# Supplementary material for: Comparison of D. melanogaster and C. elegans developmental stages, tissues, and cells by modENCODE RNA-seq data
Source: HighWire-hosted journal article supplement (doi:10.1101/gr.170100.113), 2014-07-01
Supplement: Supplemental_Files.zip [file FigureS1 illustration of fly and worm life cycles.pdf › Supplementary files/FigureS1 illustration of fly and worm life cycles.pdf]

Figure S1

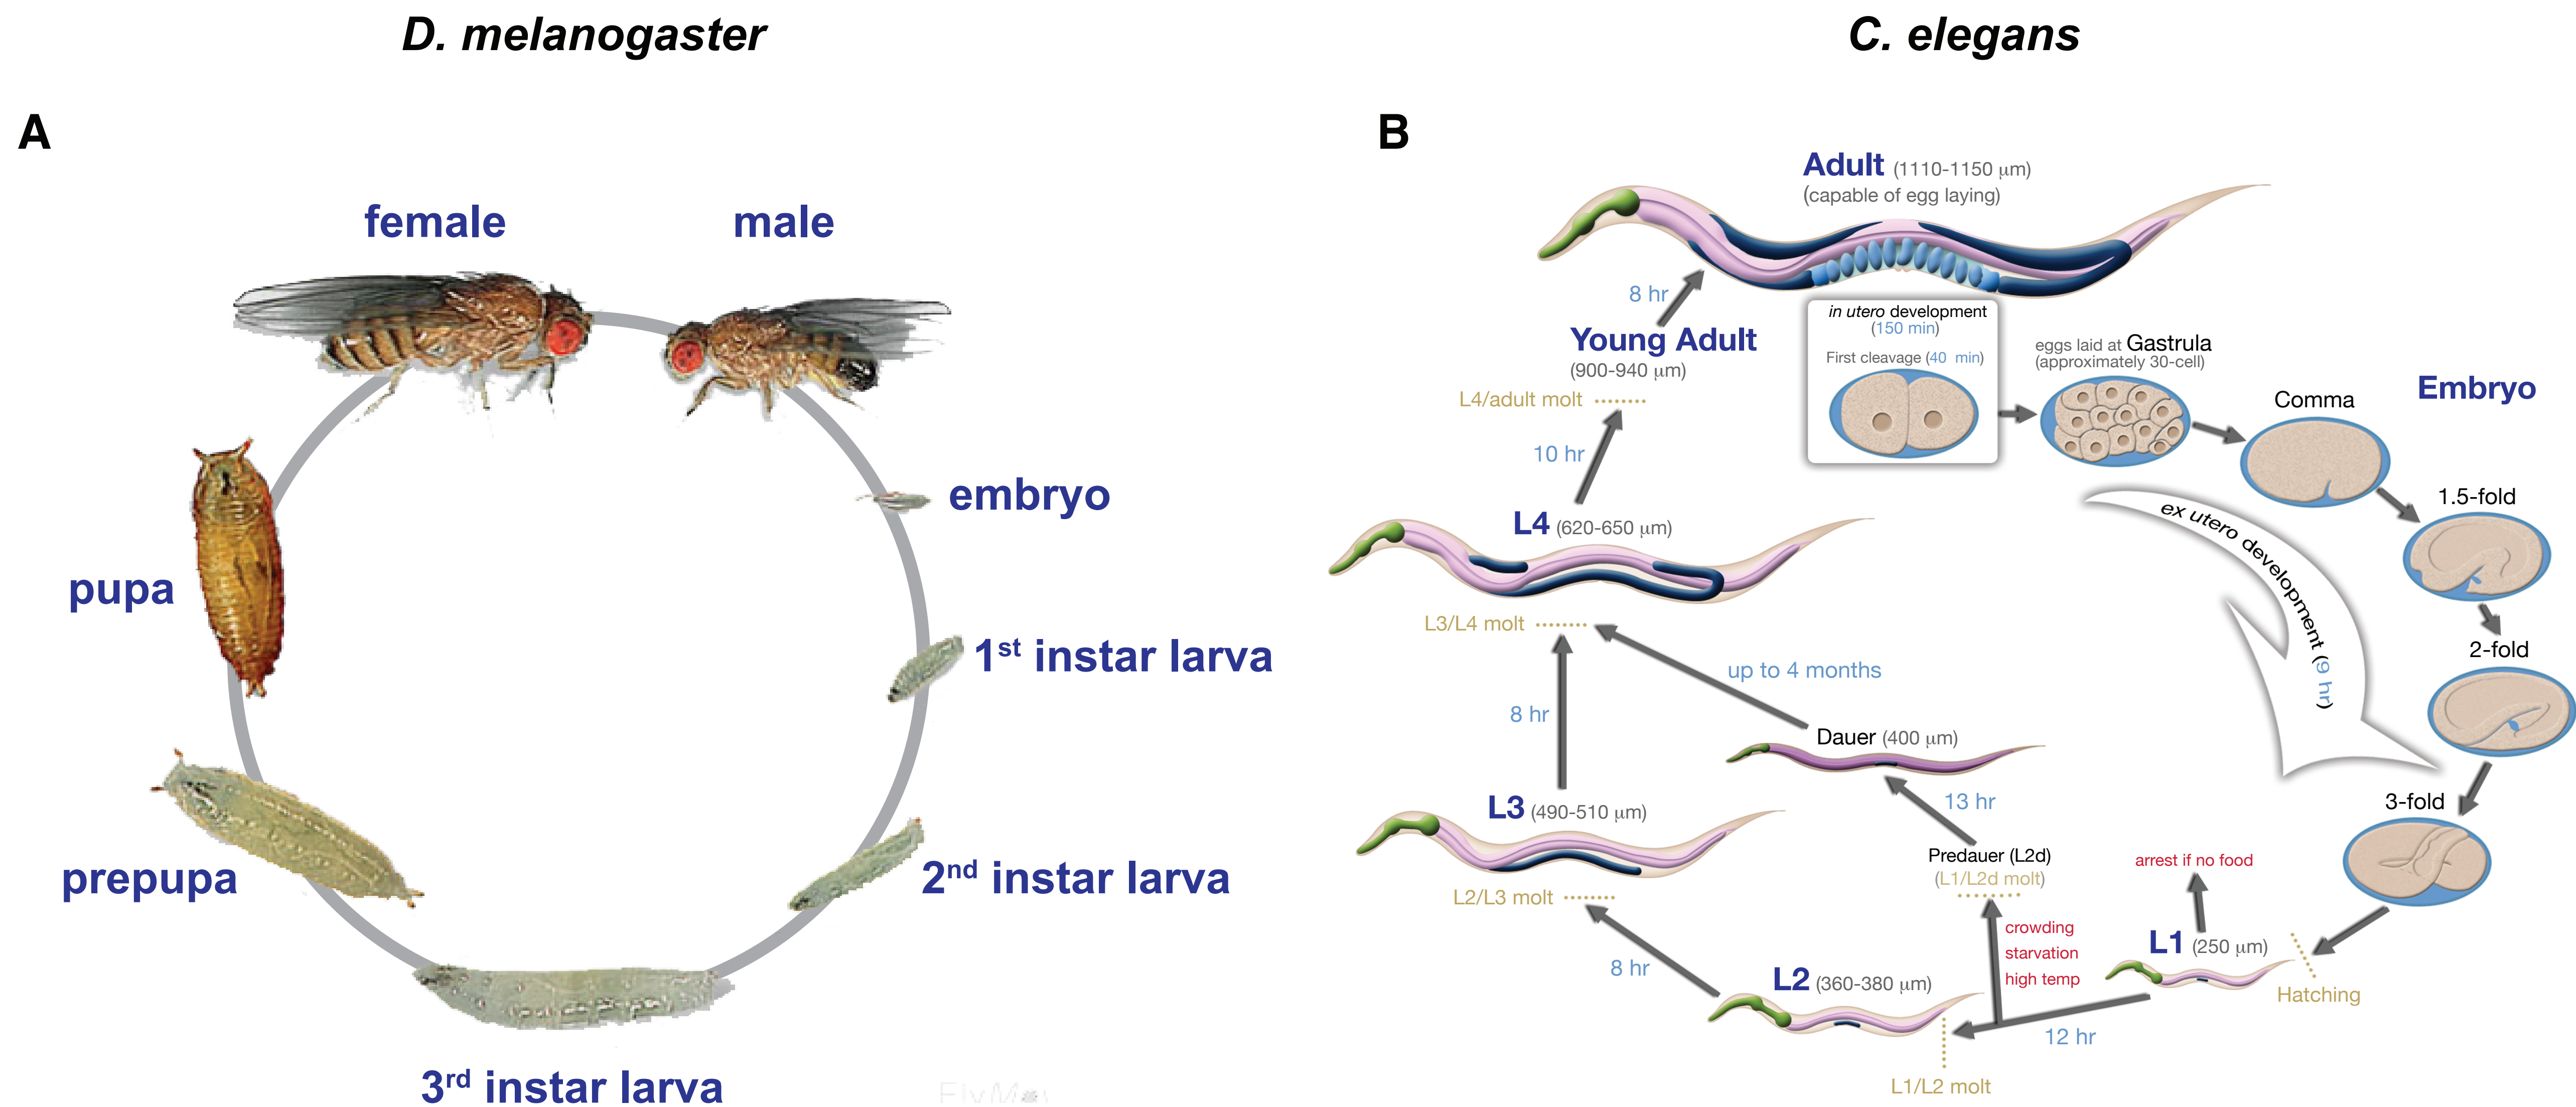

Figure S1. Life cycles of *D. melanogaster* and *C. elegans*. (A) Life cycle of *D. melanogaster* (modified with permission from FlyMove (Weigmann et al. 2003) by Dr. Christian Klämbt). (B) Life cycle of *C. elegans* (reprinted with permission from Wormatlas (Altun 2002-2012) by Dr. David H. Hall and Dr. Zeynep F. Altun).
