# Supplementary material for: Comparison of D. melanogaster and C. elegans developmental stages, tissues, and cells by modENCODE RNA-seq data
Source: HighWire-hosted journal article supplement (doi:10.1101/gr.170100.113), 2014-07-01
Supplement: Supplemental_Files.zip [file FigureS3 fly_tissues_cells_vs_classes.pdf › Supplementary files/FigureS3 fly_tissues_cells_vs_classes.pdf]

Figure S3

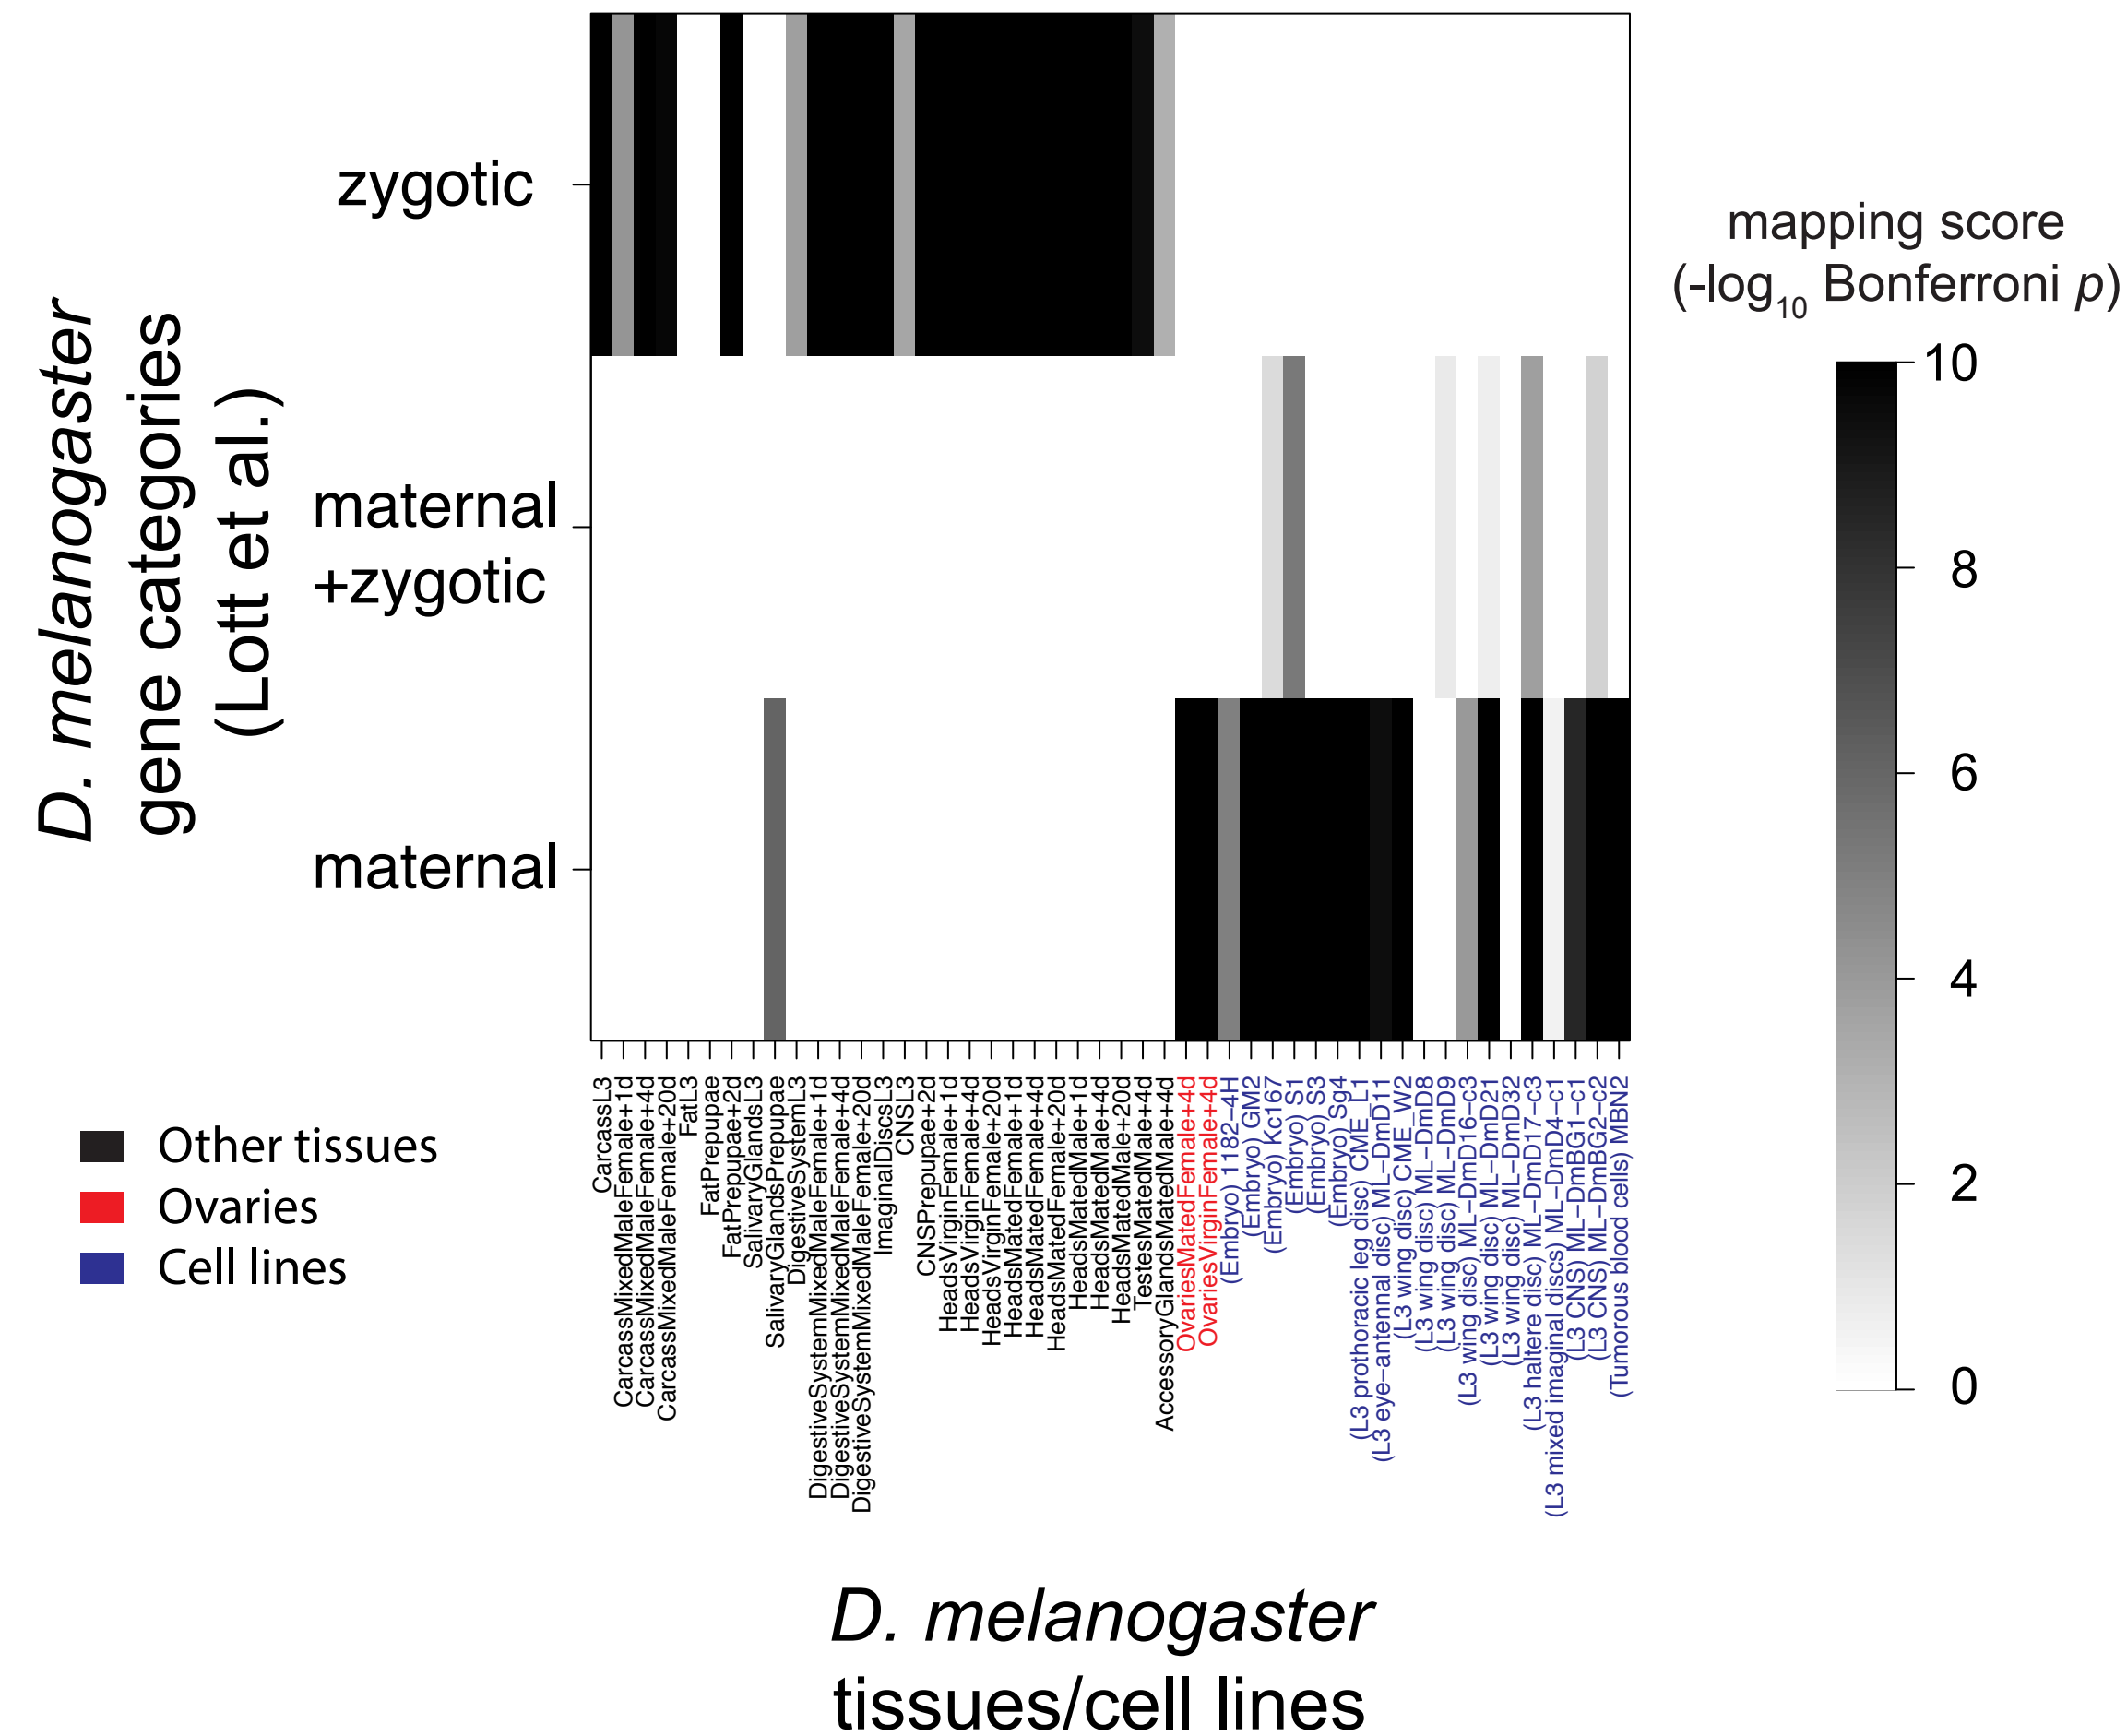

Figure S3. Comparison of *D. melanogaster* tissues and cell lines with the three gene categories (maternal, maternal/zygotic, and zygotic) defined in (Lott et al. 2011). More significant mapping scores are shown as darker color, corresponding to the scale showing  $-\log_{10}$  transformed Bonferroni corrected  $p$ -values, which are calculated from the hypergeometric test in Figure 2A. Hierarchical clustering was applied to order the tissues and cell lines.
