# Supplementary material for: Comparison of D. melanogaster and C. elegans developmental stages, tissues, and cells by modENCODE RNA-seq data
Source: HighWire-hosted journal article supplement (doi:10.1101/gr.170100.113), 2014-07-01
Supplement: Supplemental_Files.zip [file FigureS6 Fly Tissues GO terms .pdf › Supplementary files/FigureS6 Fly Tissues GO terms .pdf]

Figure S6

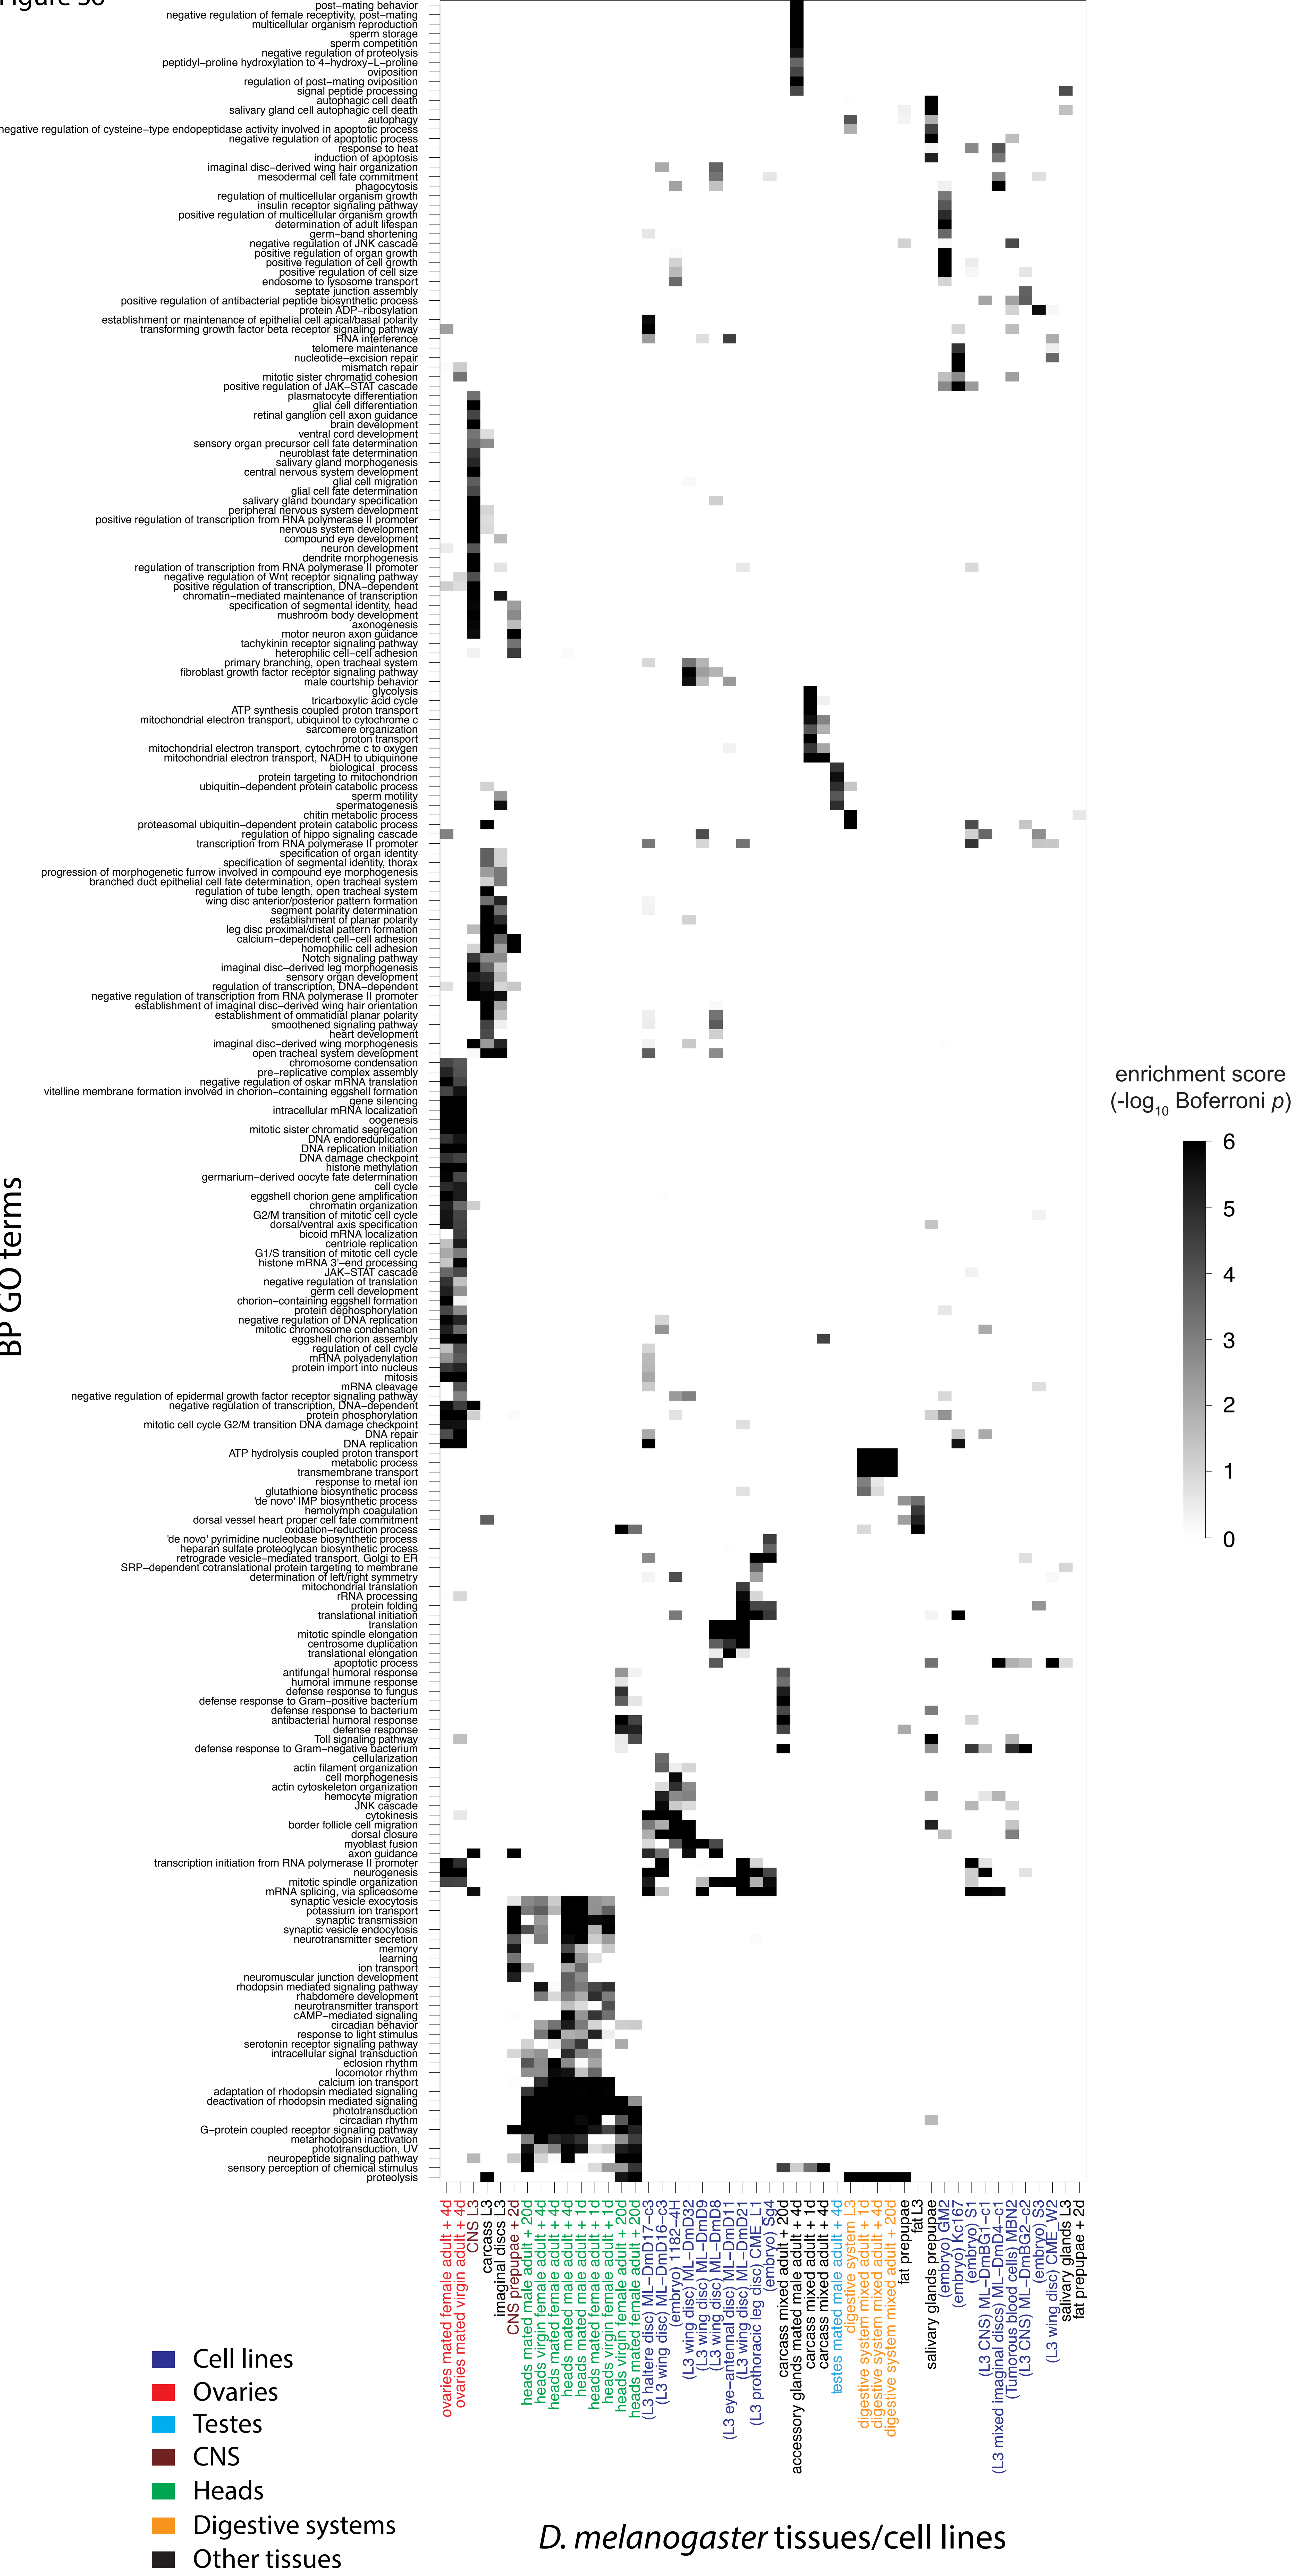

Figure S6. Enrichment patterns of top enriched biological process gene ontology (BP GO) terms across *D. melanogaster* tissues and cell lines. The enrichment scores are  $-\log_{10}$  transformed Bonferroni corrected  $p$ -values from hypergeometric tests (see Methods). Hierarchical clustering was applied to order the tissues/cell lines. Tissues from similar organs and cell lines are marked with colors. For detailed information on the stage/tissue/cell labels, please refer to Table S2.
