# Supplementary material for: Comparison of D. melanogaster and C. elegans developmental stages, tissues, and cells by modENCODE RNA-seq data
Source: HighWire-hosted journal article supplement (doi:10.1101/gr.170100.113), 2014-07-01
Supplement: Supplemental_Files.zip [file FigureS8 WormStageAll (top 10 GOterms by p-values) (all).pdf › Supplementary files/FigureS8 WormStageAll (top 10 GOterms by p-values) (all).pdf]

Figure S8

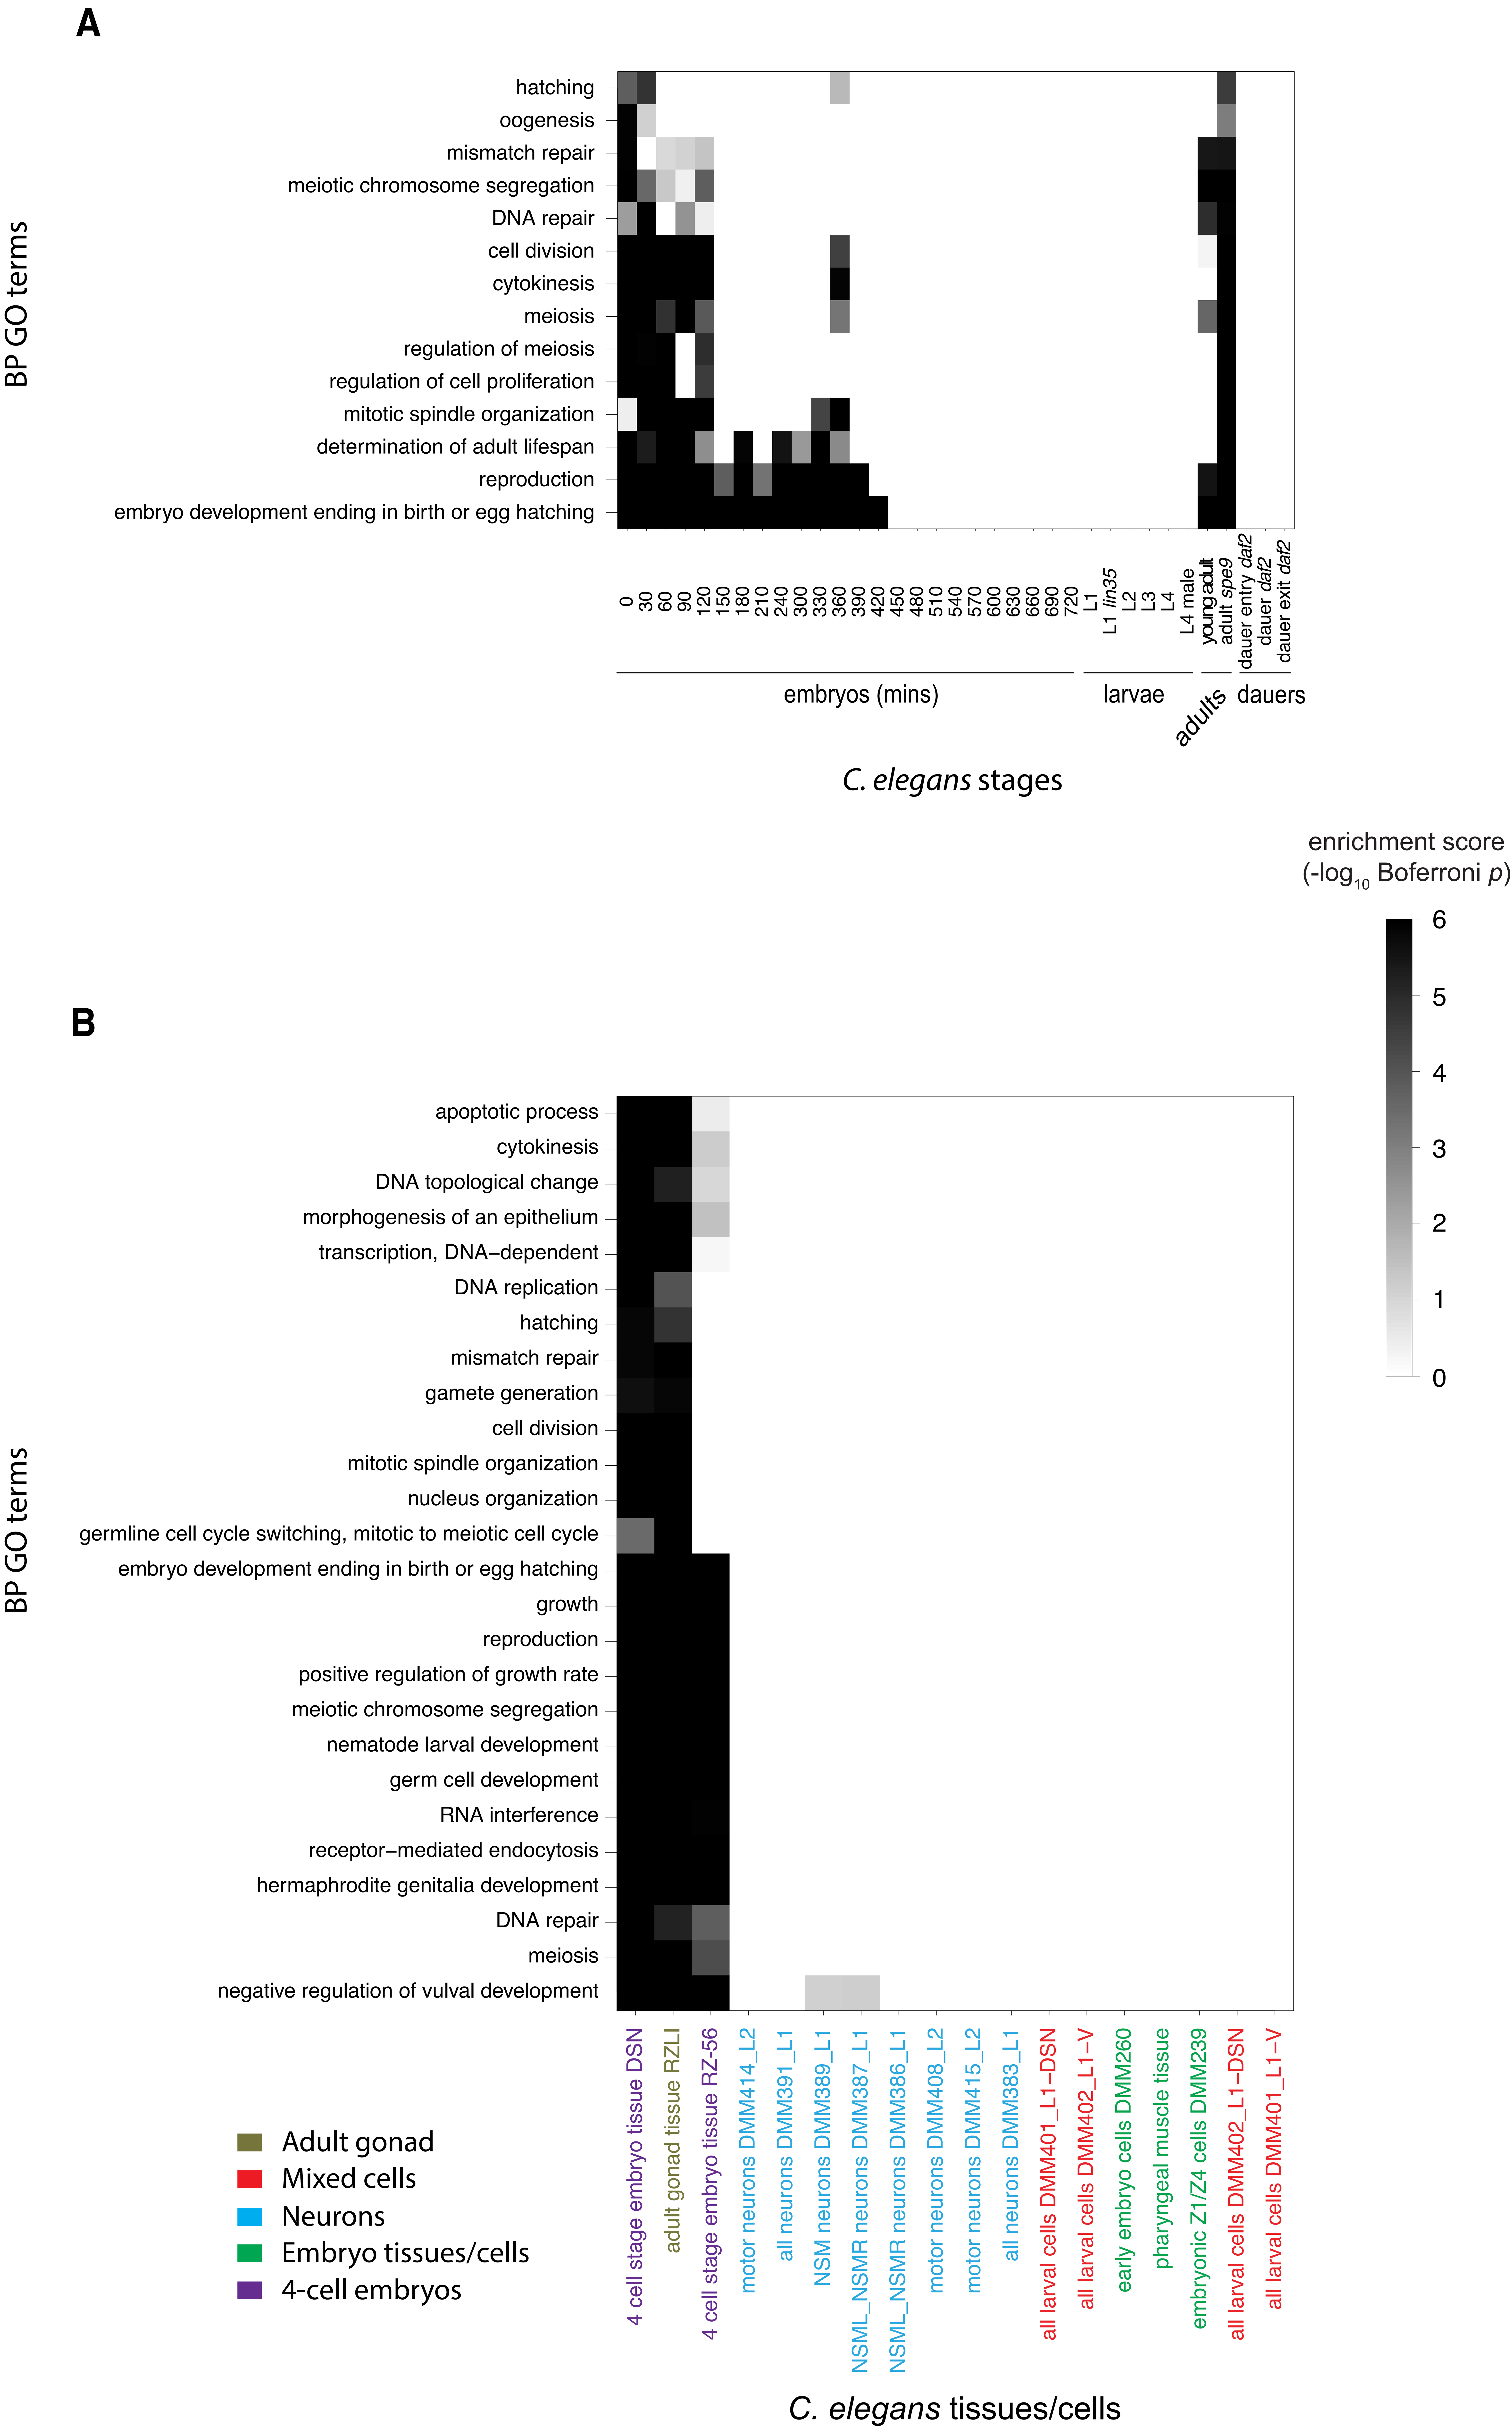

Figure S8. Enrichment patterns of top enriched biological process gene ontology terms across *C. elegans*: (A) the top enriched BP GO terms in early embryos and adults, across all developmental stages; (B) the top enriched BP GO terms in 4 cell stage embryos and adult gonad tissues, across all tissues and dissected cells. The enrichment scores are  $-\log_{10}$  transformed Bonferroni corrected  $p$ -values from hypergeometric tests (see Methods). Hierarchical clustering was applied to order the tissues/cells in (B). Tissues and dissected cells from similar organs are marked with colors. For detailed information on the stage/tissue/cell labels, please refer to Table S2.
