# Supplementary material for: Comparison of D. melanogaster and C. elegans developmental stages, tissues, and cells by modENCODE RNA-seq data
Source: HighWire-hosted journal article supplement (doi:10.1101/gr.170100.113), 2014-07-01
Supplement: Supplemental_Files.zip [file FigureS9 Worm Stages GO terms.pdf › Supplementary files/FigureS9 Worm Stages GO terms.pdf]

Figure S9

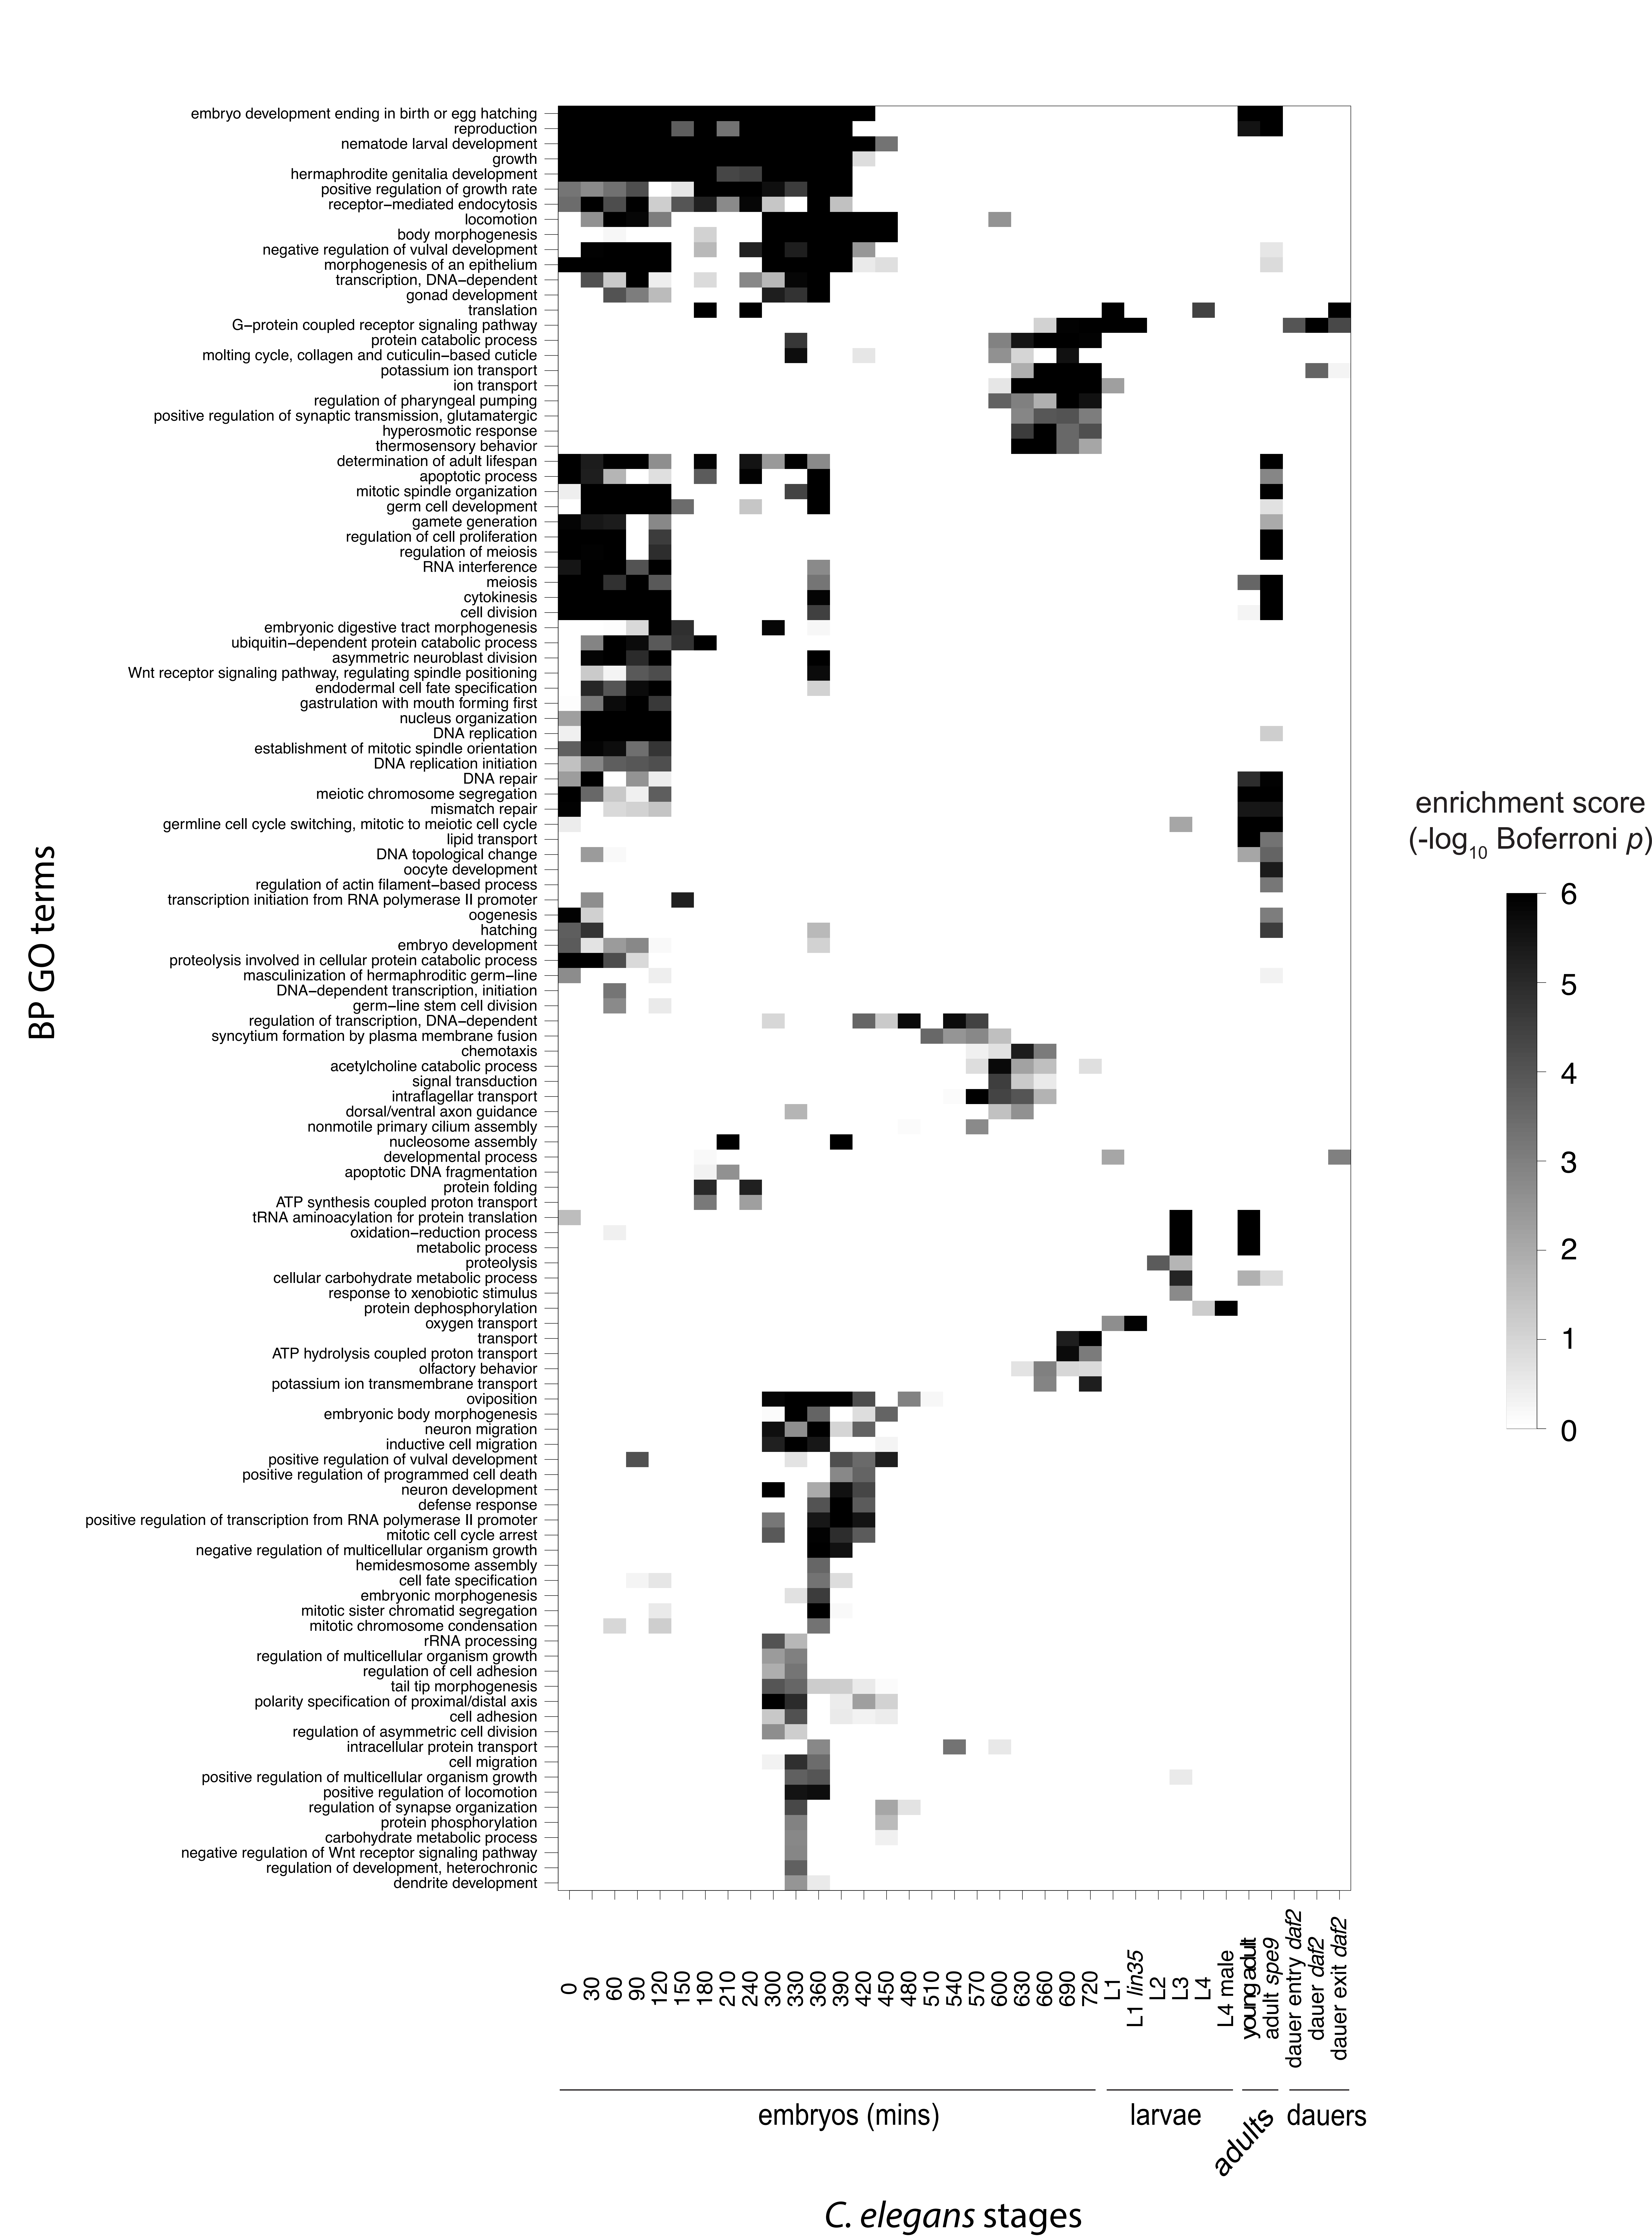

Figure S9. Enrichment patterns of top enriched biological process gene ontology (BP GO) terms across *C. elegans* developmental stages. The enrichment scores are  $-\log_{10}$  transformed Bonferroni corrected  $p$ -values from hypergeometric tests (see Methods). For detailed information on the stage/tissue/cell labels, please refer to Table S2.
