# Supplementary material for: Comparison of D. melanogaster and C. elegans developmental stages, tissues, and cells by modENCODE RNA-seq data
Source: HighWire-hosted journal article supplement (doi:10.1101/gr.170100.113), 2014-07-01
Supplement: Supplemental_Files.zip [file FigureS11 WormStageAll (top 10 clusters by p-values) (all).pdf › Supplementary files/FigureS11 WormStageAll (top 10 clusters by p-values) (all).pdf]

Figure S11

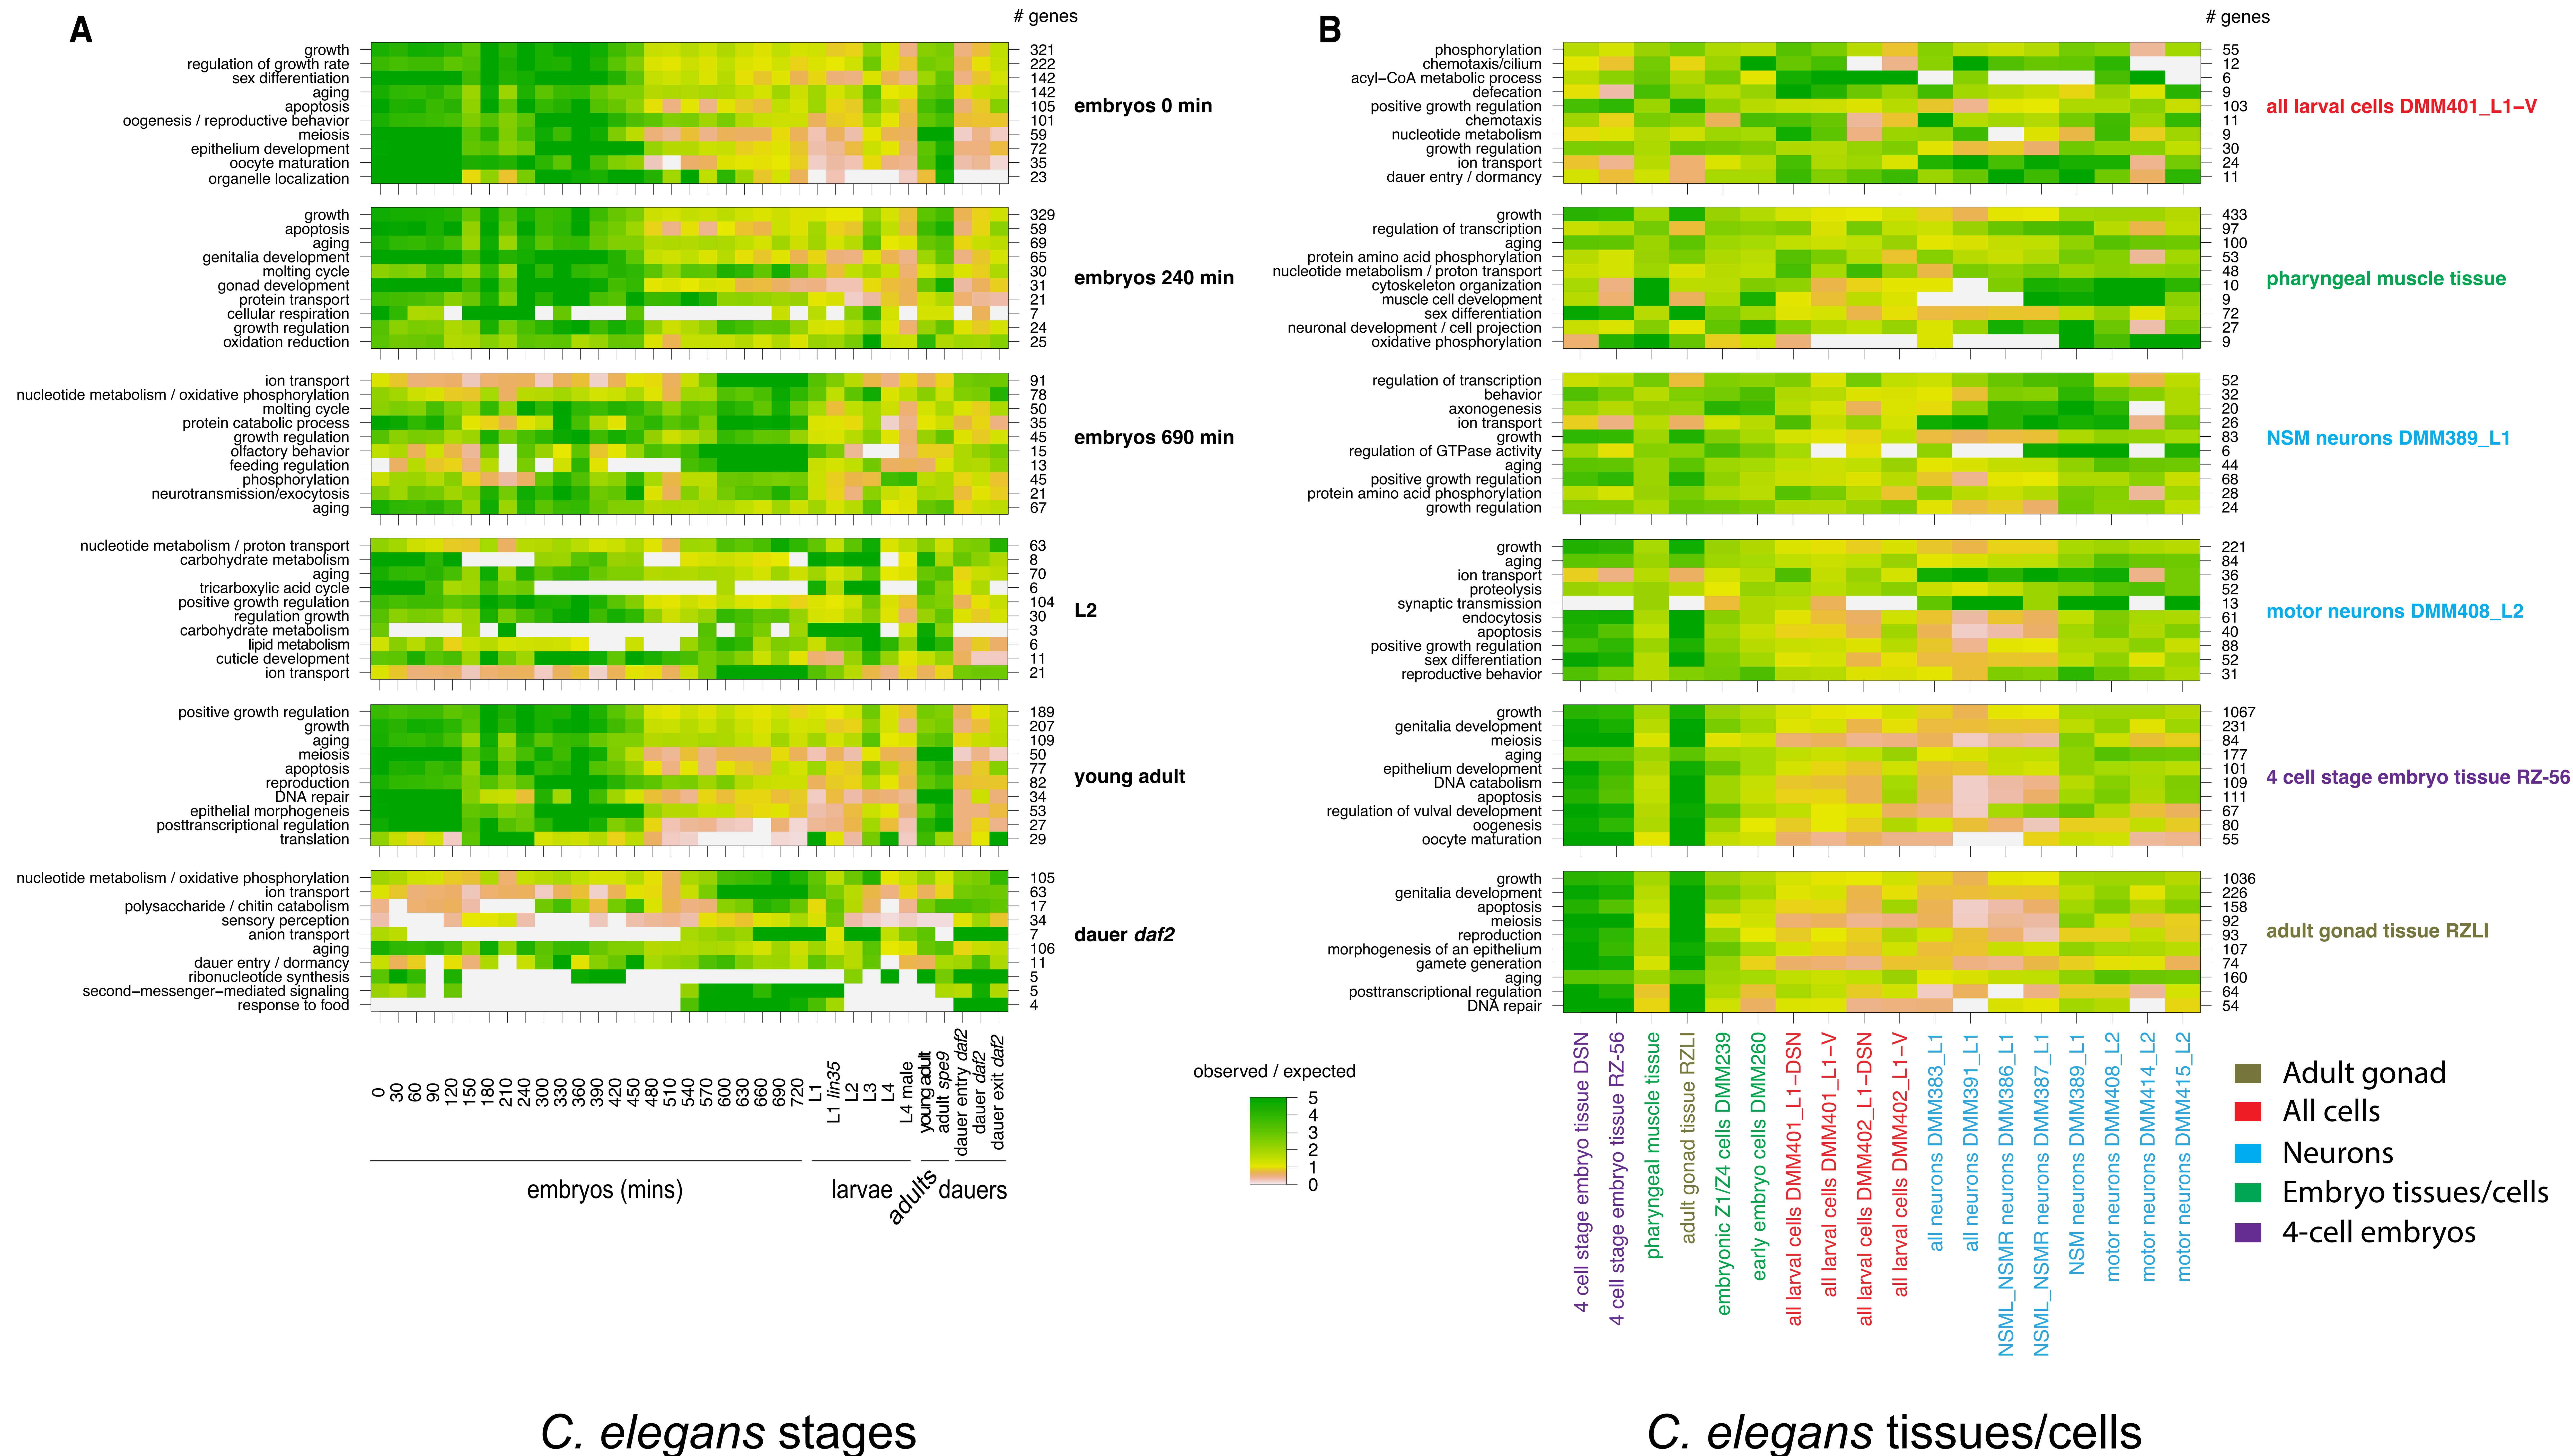

Figure S11. Top 10 enriched GO clusters in (A) six example worm developmental stages and (B) six example worm tissues/dissected cells. The heatmaps show the ratios of observed gene counts / expected gene counts of every GO cluster in every stage or tissue/dissected cell. The observed gene counts of the GO clusters in every example sample (stage or tissue/dissected cell) are also listed.
