# Supplementary material for: Comparison of D. melanogaster and C. elegans developmental stages, tissues, and cells by modENCODE RNA-seq data
Source: HighWire-hosted journal article supplement (doi:10.1101/gr.170100.113), 2014-07-01
Supplement: Supplemental_Files.zip [file FigureS12 2-to-1 fly-worm stage alignment.pdf › Supplementary files/FigureS12 2-to-1 fly-worm stage alignment.pdf]

## Figure S12

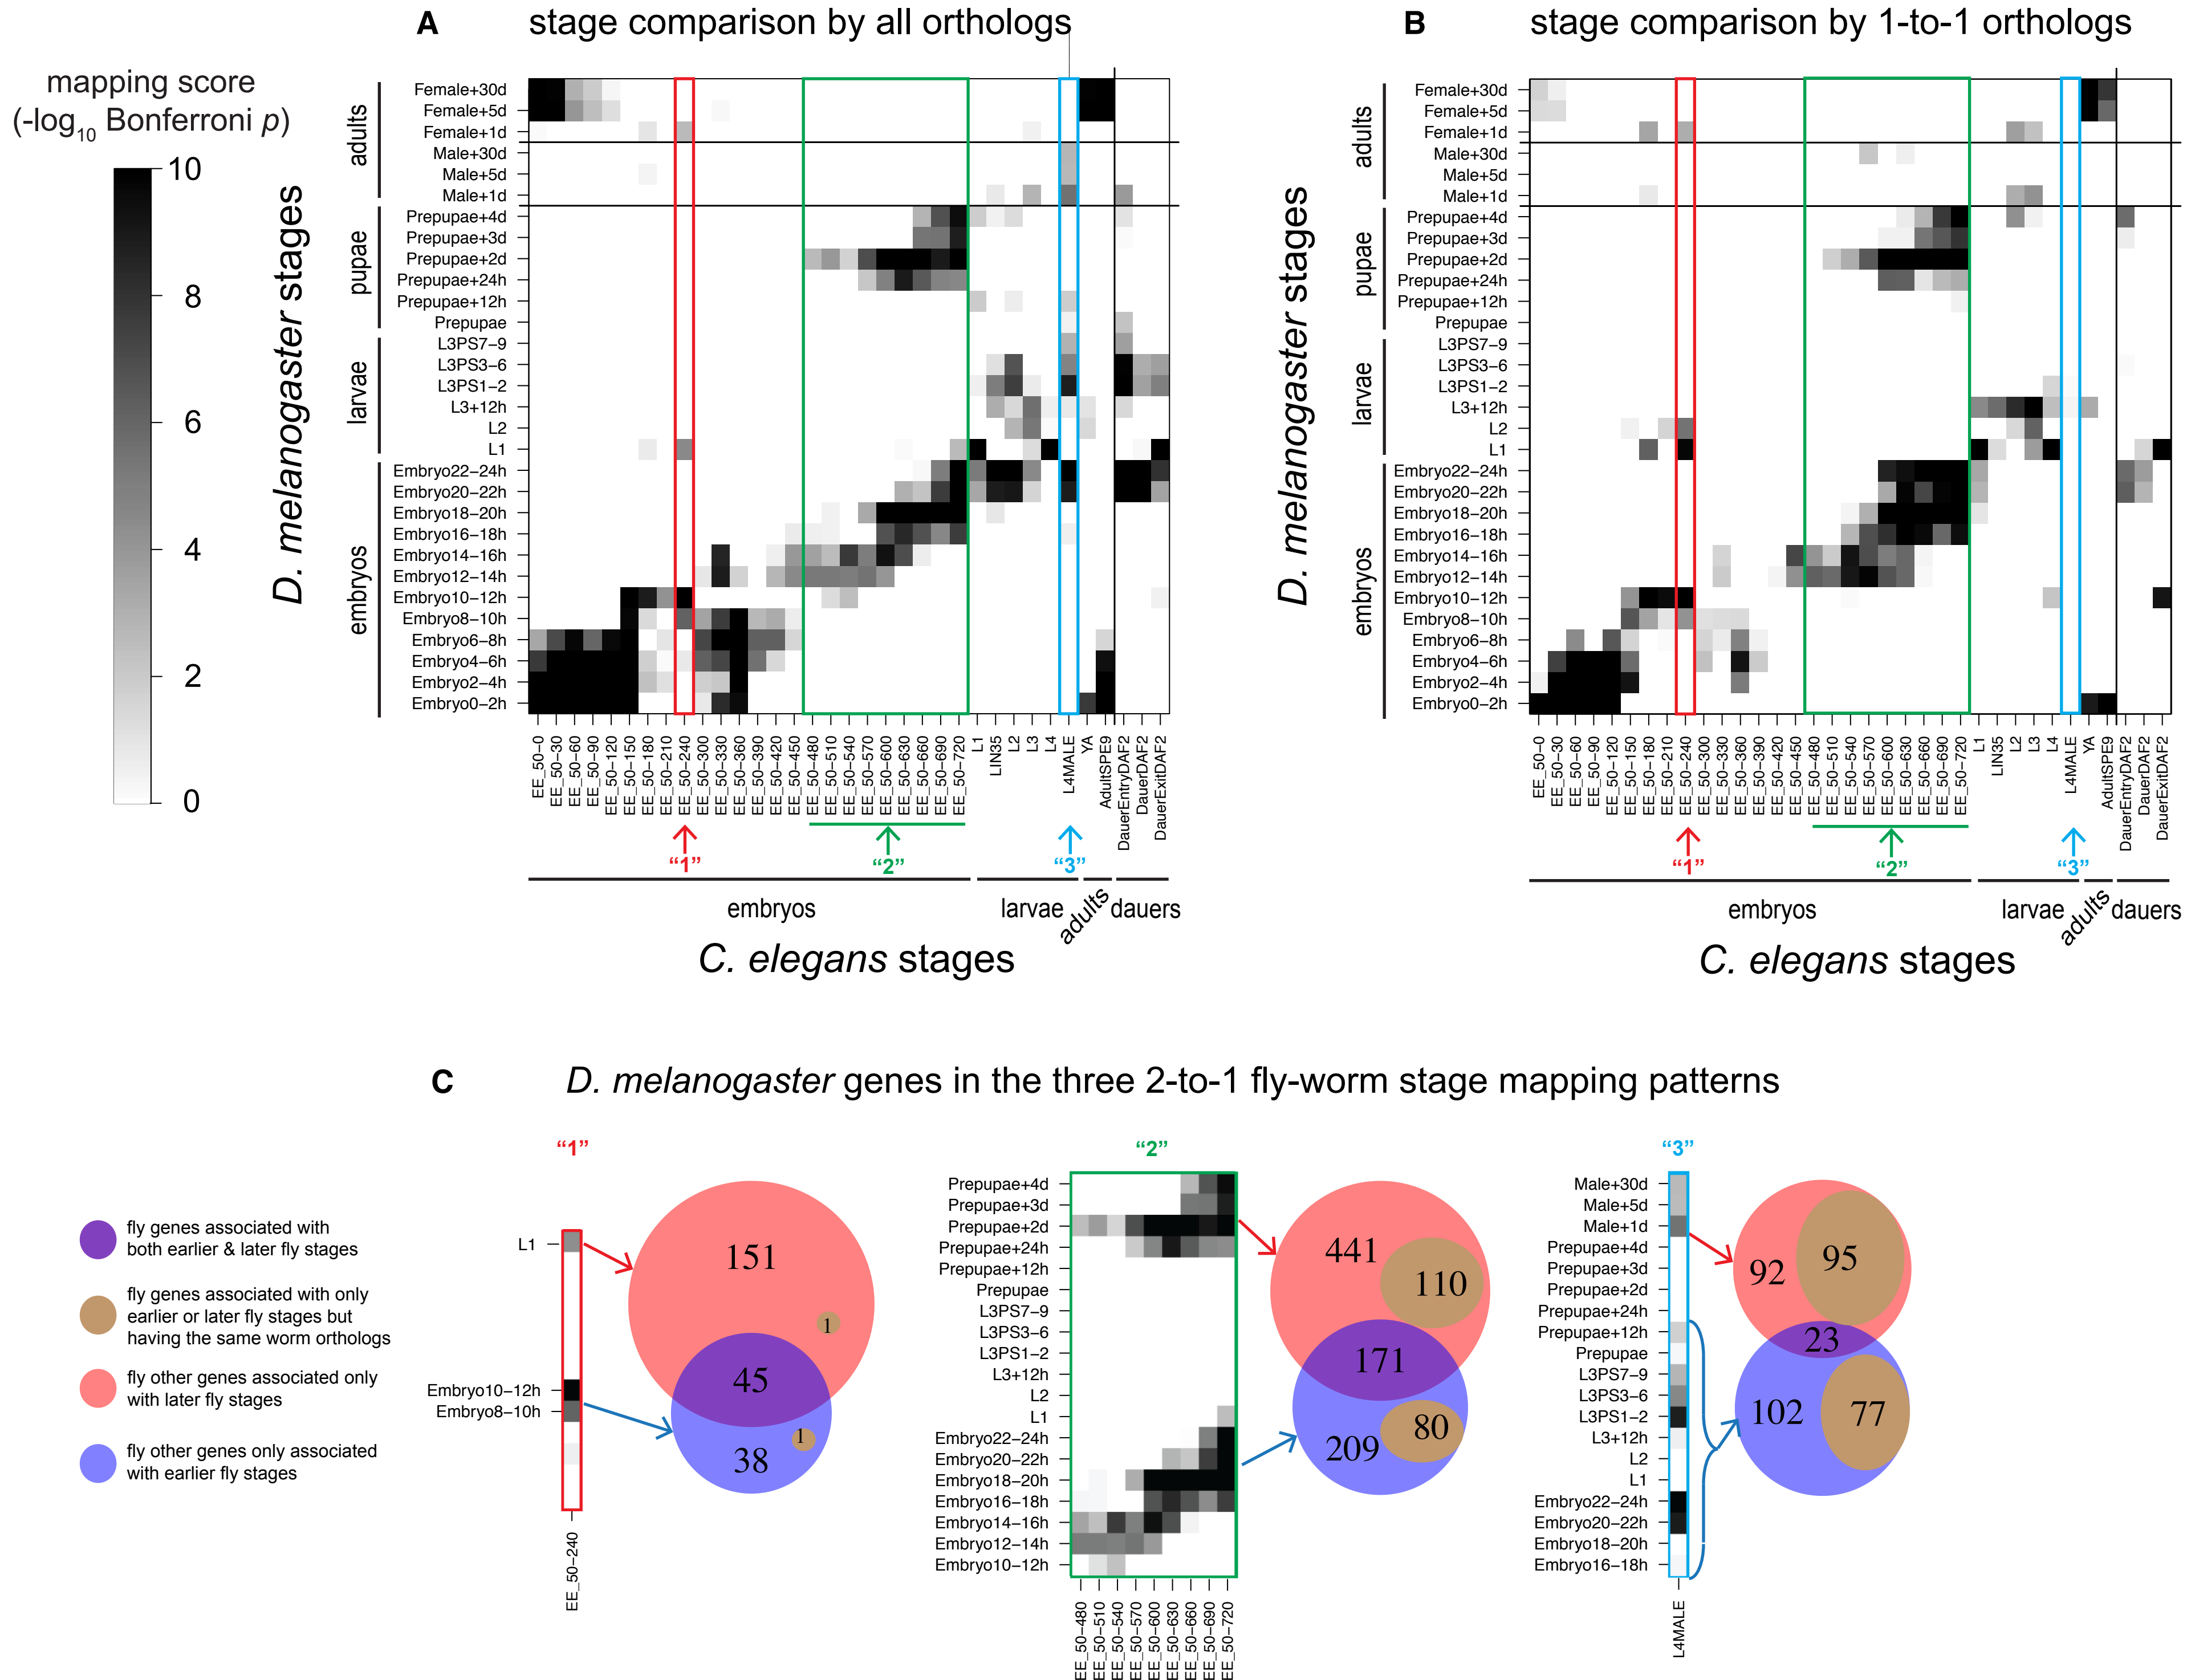

Figure S12. Interpretation of the two-to-one fly-worm stage mapping patterns. (A) Comparison between *D. melanogaster* and *C. elegans* developmental stages by using all ortholog pairs. The red, green and cyan boxes marked the three main two-to-one fly-worm stage mapping columns. (B) Comparison between *D. melanogaster* and *C. elegans* developmental stages by using only one-to-one ortholog pairs. The red, green and cyan boxes are in same positions as the corresponding boxes in (A). (C) Classification of ortholog-pairs based on their involvement in the “early mapping” (the lower block of fly stages) and “late mapping” (the upper block of fly stages) in each column (“1”, “2” or “3”) in (A).
