# Supplementary material for: Comparison of D. melanogaster and C. elegans developmental stages, tissues, and cells by modENCODE RNA-seq data
Source: HighWire-hosted journal article supplement (doi:10.1101/gr.170100.113), 2014-07-01
Supplement: Supplemental_Files.zip [file FigureS14 correlation approach(color).pdf › Supplementary files/FigureS14 correlation approach(color).pdf]

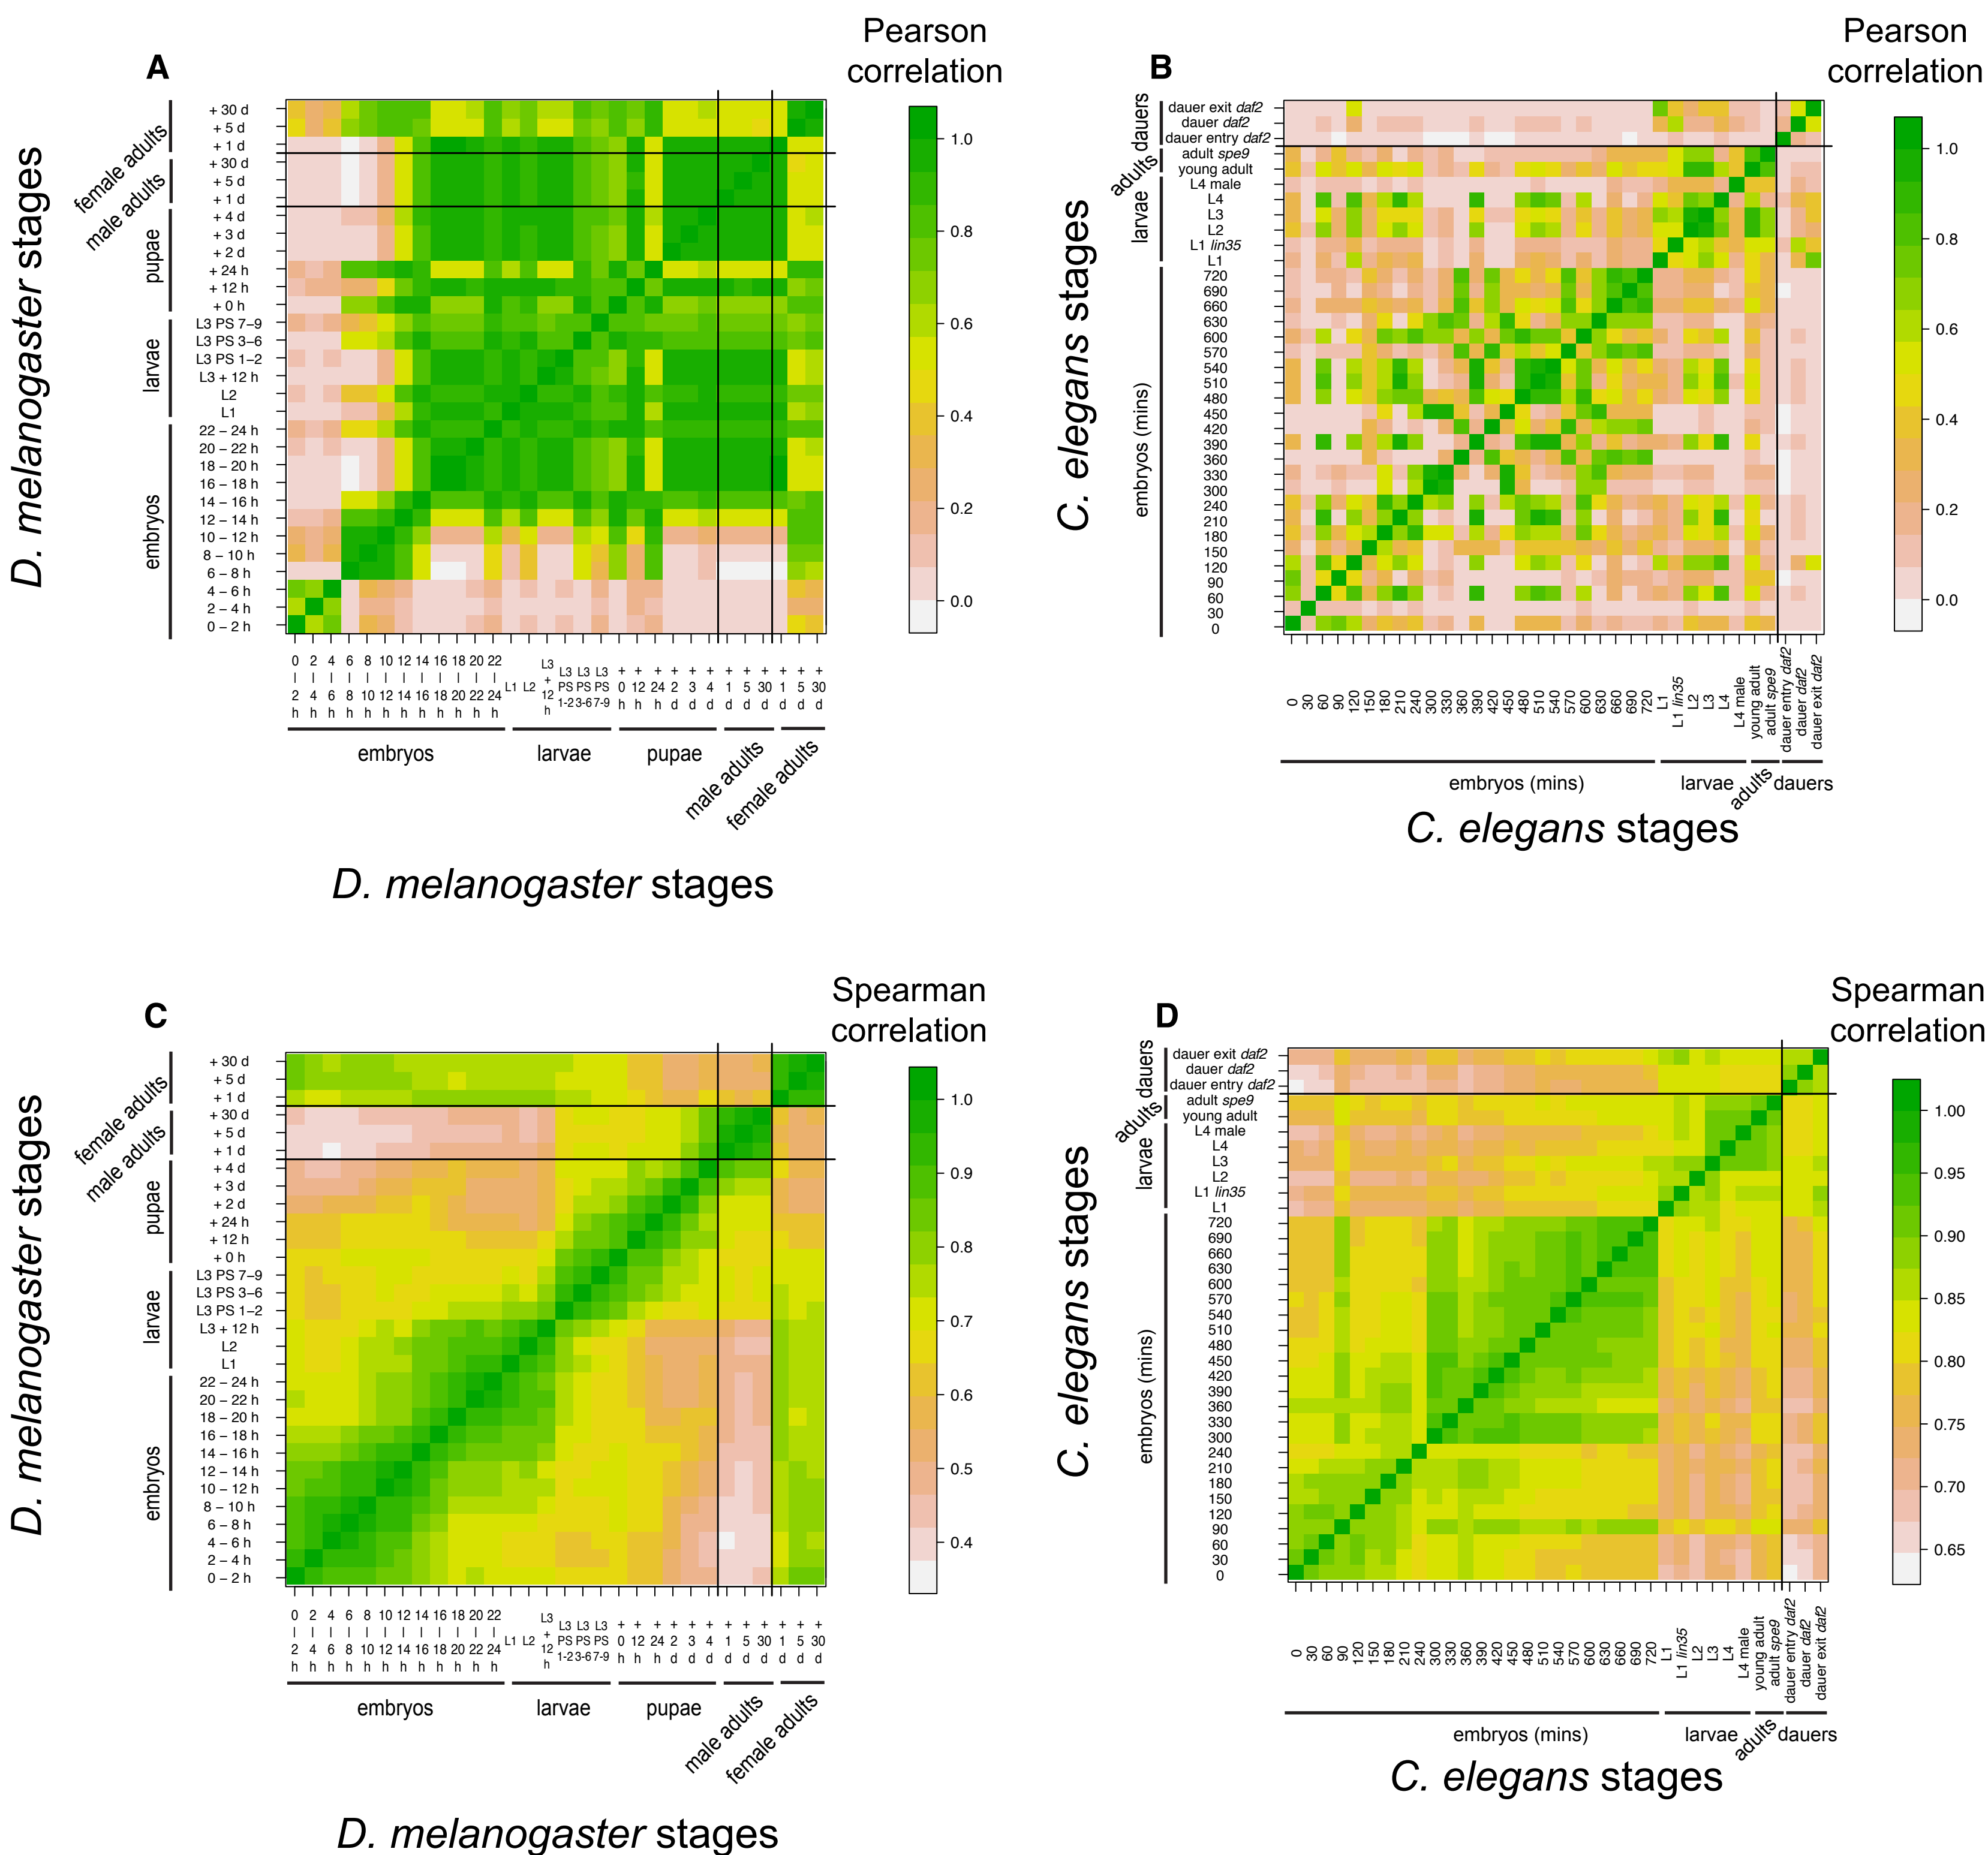

Figure S14. Correlation analysis approaches for comparing developmental stages within *D. melanogaster* and *C. elegans*. Pearson and Spearman correlations are calculated based on all protein-coding gene expression levels in *D. melanogaster* or *C. elegans*. Larger correlations are shown as darker color, corresponding to the scale next to each panel. (A) Pearson correlation for every pair of *D. melanogaster* stages. (B) Pearson correlation for every pair of *C. elegans* stages. (C) Spearman correlation for every pair of *D. melanogaster* stages. (D) Spearman correlation for every pair of *C. elegans* stages. For detailed information on the stage labels, please refer to Table S2.
