# Supplementary material for: Comparison of D. melanogaster and C. elegans developmental stages, tissues, and cells by modENCODE RNA-seq data
Source: HighWire-hosted journal article supplement (doi:10.1101/gr.170100.113), 2014-07-01
Supplement: Supplemental_Files.zip [file FigureS15 StageMappingByTreeFam.pdf › Supplementary files/FigureS15 StageMappingByTreeFam.pdf]

Figure S15

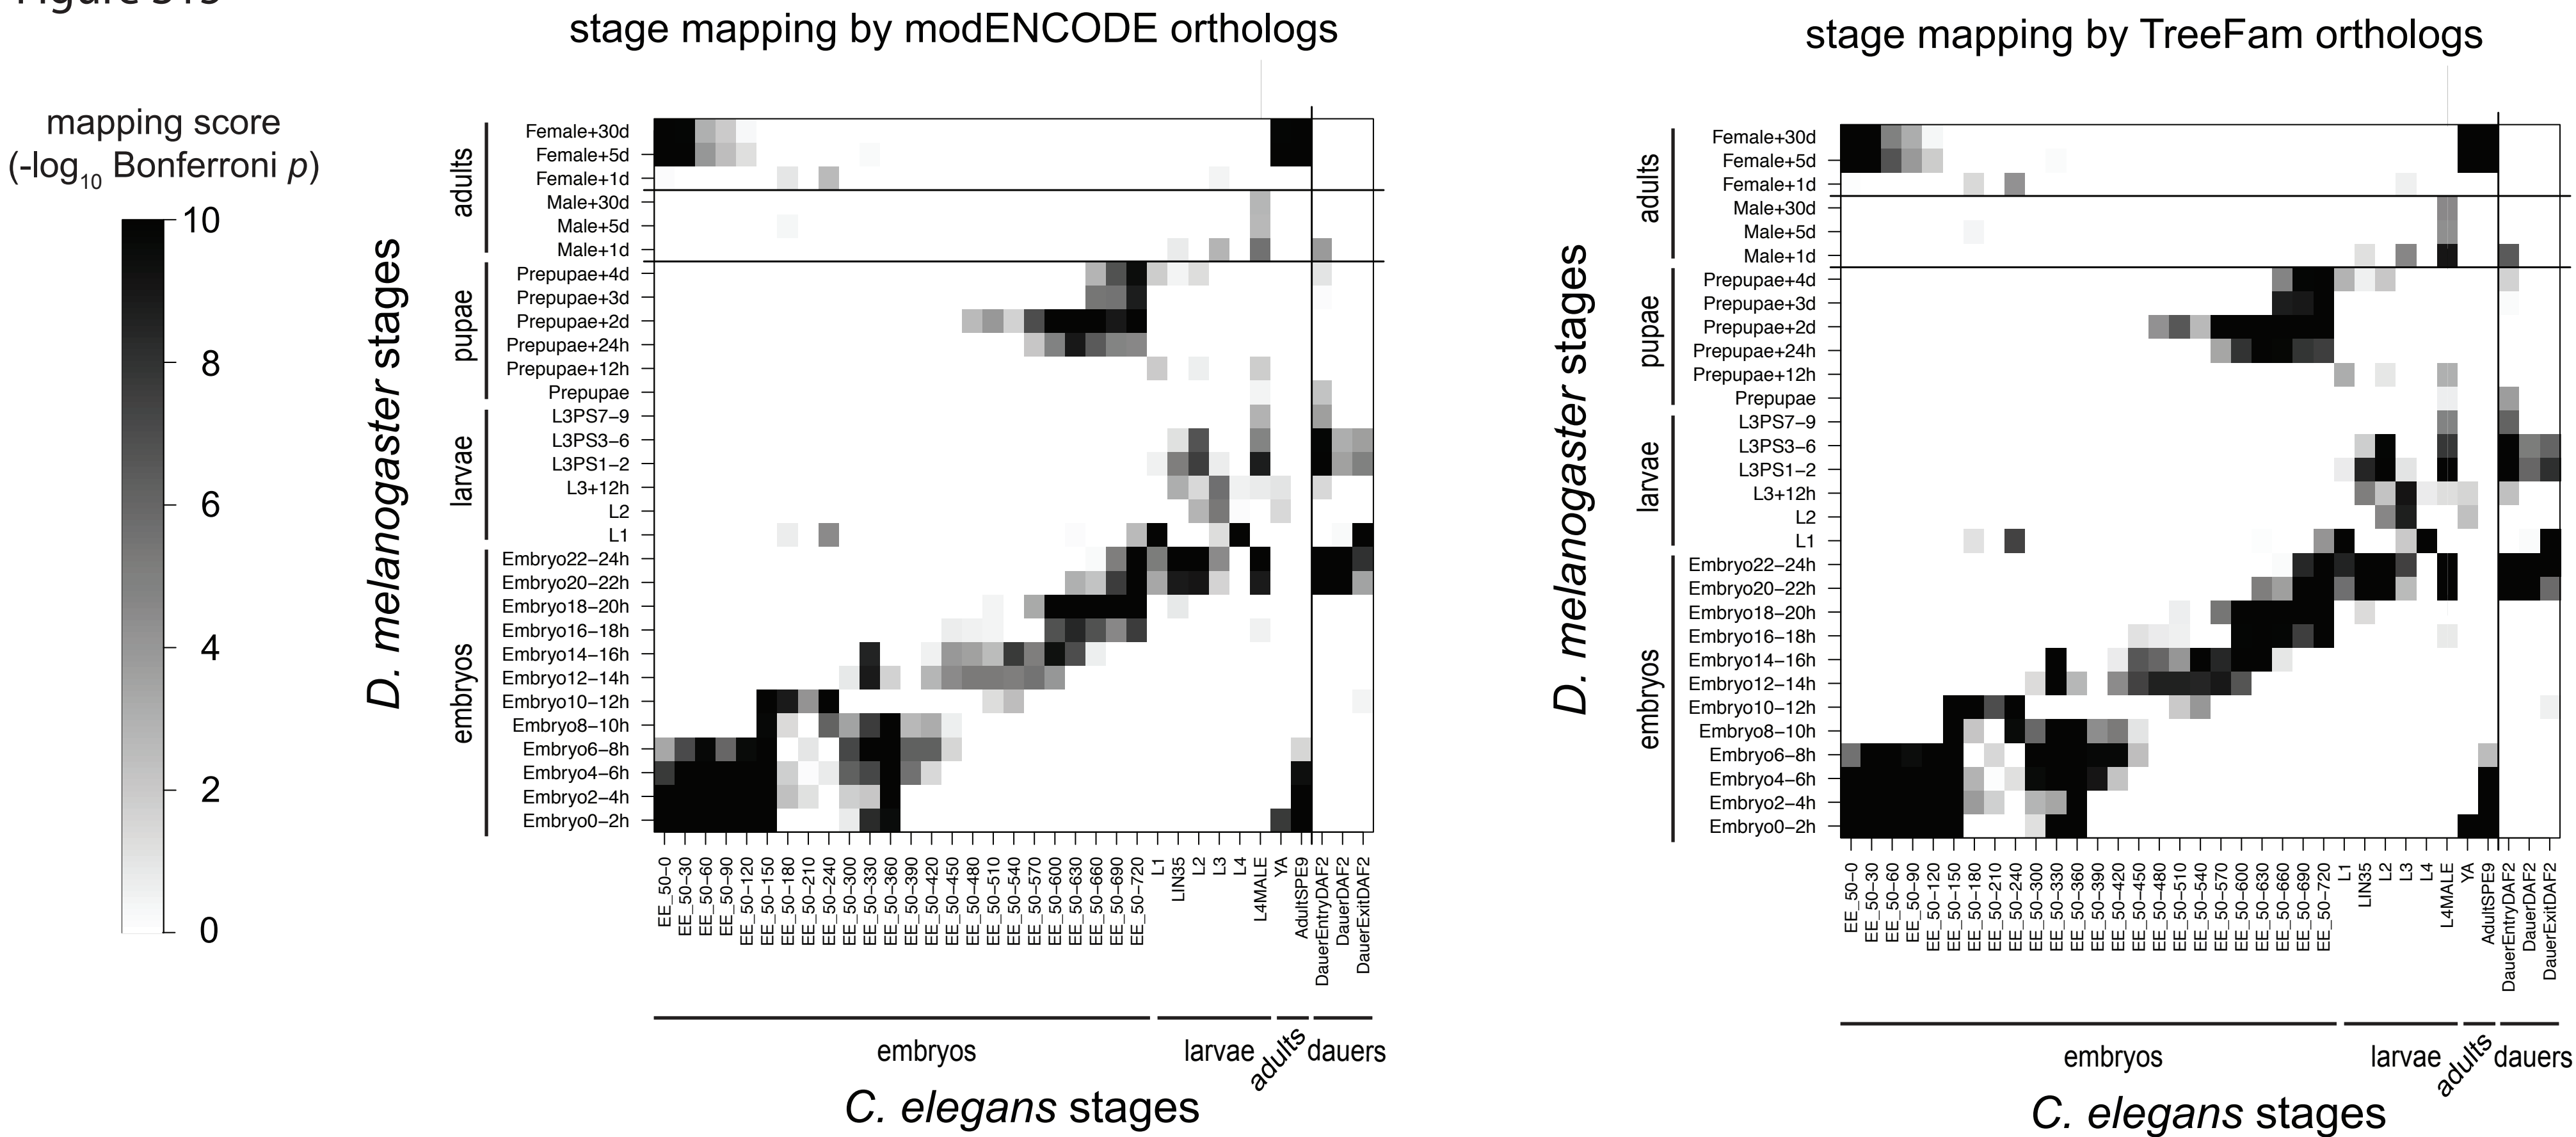

Figure S15. Comparison results of different developmental stages between *D. melanogaster* and *C. elegans* based on (A) modENCODE orthologs, same as Figure 5A, or (B) TreeFam (Li et al., 2006) orthologs. The results are highly similar.
