# Supplementary material for: Comparison of D. melanogaster and C. elegans developmental stages, tissues, and cells by modENCODE RNA-seq data
Source: HighWire-hosted journal article supplement (doi:10.1101/gr.170100.113), 2014-07-01
Supplement: Supplemental_Files.zip [file Supplementary materials.doc]

**Supplementary Materials**

**SUPPLEMENTARY RESULTS**

**More functional analyses on *D. melanogaster* stage, tissue, and cell-associated genes**

In addition to the function analysis results in the main paper, we further studied the biological processes involved in fly stages, tissues, and cell lines by looking at clusters of GO terms, which constitute a better summary of biological functions than individual GO terms do. We identified enriched clusters of biological process Gene Ontology (GO) terms in the associated genes of every fly stage, tissue, and cell line (see SUPPLEMENTARY METHODS for detail) (Tables S5A and S5B). For demonstration purpose, we selected six representative developmental stages and six representative tissues/cell lines; Figure S7 lists the top 10 most enriched GO clusters in each of the representative stages or tissues/cell lines, and show the enrichment patterns of these GO clusters across either all stages (Figure S7A) or all tissues/cell lines (Figure S7B). Given a representative stage or tissue/cell line, the top 10 enriched GO clusters exhibit stage- or tissue/cell line-specific enrichment patterns. First, these results provide strong functional support for our within-fly stage and tissue/cell alignments. Similar enriched GO clusters are shared between aligned developmental stages and between aligned tissues/cell lines. For example, GO clusters related to cell division are highly enriched in both 0-2 hr. embryos and female adults (Figures S4A and S7A); in heads, ovaries, and the digestive system, different isolates of each tissue share GO clusters related to neuronal/eye functions, cell division, and metabolic processes respectively (Figures S4B and S7B). Second, our results provide a uniquely detailed annotation of the biological functions enriched in each fly developmental stage and tissue/cell line. Pleasingly, many functions are enriched in expected stages, such as cell division in 0-2 hr. embryos and adult females; regulation of gene expression in 8-10 hr. embryos; locomotion and behavior in 22-24 hr. embryos; histolysis and catabolism in prepupae; and mating in adult males. In addition, less obvious processes are also found to be stage enriched. For example, we are not aware of any previous evidence that immune response genes would be most highly expressed in prepupae or that carbohydrate metabolism and energy production would be particularly prevalent in adult males. To allow further analysis, we have provided a complete list of stage, tissue, and cell-associated genes (Table S3) and enriched GO clusters (Tables S5A-B) for all fly developmental stages and tissues/cell lines.

**More functional analyses on *C. elegans* stage, tissue, and cell-associated genes**

We conducted similar additional functional analysis to study biological processes involved in worm stages/tissues/cell lines. We picked six representative developmental stages (Figure S11A) and six representative tissues/cells (Figure S11B), and identified the 10 most enriched GO clusters in each of these representative samples. The enrichment of these GO clusters in either all worm developmental stages or all worm tissues/cell lines are summarized in Figures S11. Like the analysis in *Drosophila*, these results provide strong support for our alignments as well as providing a detailed functional annotation of genes highly enriched in different developmental stages and tissues/cell lines. For example, early embryos and young adults are both enriched with GO clusters related to growth and reproduction as are 4 cell stage embryos and adult gonad tissue; GO clusters related to dauer entry and response to food are among the 10 most enriched functions in dauers, but are also well enriched in late stage embryos and L1 larva; 240 minute embryos are enriched for genes annotated for gonad development; and 690 minute embryos are enriched in neurogenesis genes. A complete list of associated genes and enriched GO clusters at every worm developmental stage or tissue/cell is given in Tables S3 and S6A-B.

**More functional analyses on mapped fly-worm stage pairs**

To discover the biological processes involved in the fly-worm stage mapping (Figure 5A), for every worm stage, we picked either the fly stage it was most strongly mapped to (if the worm stage was not involved in the two parallel patterns) or the most strongly mapped early and late fly stages (if the worm stage was involved in the parallel patterns). A complete summary of the fly and orthologous worm associated genes that are co-expressed in each stage pair and their GO terms are given in Table S7A. We then analyzed the enriched GO clusters involved in all of these stage-pairs, limiting our analysis to the fly GO terms associated with each orthologous gene pair to provide a single language for each stage-pair (Table S7B).

To illustrate a representative subset of the data, Table S7C lists the ten top enriched GO clusters in each of nine representative stage-pairs, including two each for the early and late mapping of columns “1”, “2” and “3” (Figure 5A inset). As expected, the biological functions involved in most stage-pairs are quite distinct from those of others, except between the three sets of early and late mappings of fly stages to a single worm stage, when many GO clusters are related. For column “1”, translation and RNA processing genes are common in the early and late mappings; for column “2”, ion transport, neuronal function and behavior; and for column “3” ion transport and protein phosphorylation (Table S7C). Interestingly, the genes common in the early and late mappings of column “1” include many ribosomal proteins, two fold reductions in the expression of which have been long known to significantly lower cell division rates in a cell autonomous manner (Ashburner, Golic, & Hawley, 2005). Thus our observations that these and other general metabolic genes show stage specific increases in expression imply that even the regulation of relatively general housekeeping genes could play a key role in important developmental processes.

**More detailed analysis on the fly-worm orthologs leading to the two-to-one fly-worm stage mapping patterns**

To more fully characterize the two-to-one fly-worm stage mapping patterns, we first addressed the question: given a worm stage, are the two blocks of fly stages in its “early mapping” and “late mapping” mapped to each other in the within-fly stage comparison? By comparing the three columns “1”, “2” and “3” in Figure 5A (inset) with the stage comparison results in Figure 3A, we found that the two fly stage blocks in column “1” (middle embryos and L1 larvae) were moderately mapped within fly, and so were the two fly stage blocks in column “2” (middle to late embryos and pupae). However, the two fly stage blocks in column “3” (late embryos to prepupae and male adults) were not mapped within fly, suggesting that the off-diagonal stage mappings in Figure 3A cannot fully explain all of the two-to-one fly-worm stage mapping patterns in Figure 5A. This discovery brought up the second question: were the “early mapping” and “late mapping” in a column due to the expression of the same fly-worm ortholog pairs? To answer this question, we classified all fly-worm ortholog pairs based on their involvement in the “early mapping” and “late mapping” of a column. For example, suppose that we have a worm stage *W* mapped to two fly stages *FE* (the earlier stage) and *FL* (the later stage), i.e., the “early mapping” is *W*
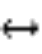
*FE*, and the “late mapping” is *W*
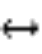
*FL*. Also suppose that *W* has stage-associated genes *w*1, *w*2, *w*3, *w*4; *FE* has stage associated genes *f*1, *f*2, *f*4; *FL* has stage associated genes *f*1, *f*3, *f*5. Fly-worm ortholog pairs are *w*1
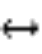
*f*1, *w*2
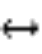
*f*2, *w*3
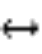
*f*3, and *w*4
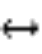
*f*4/*f*5. Hence, the ortholog pairs involved in the “early mapping” are *w*1
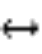
*f*1, *w*2
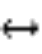
*f*2, and *w*4
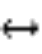
*f*4; the ortholog pairs involved in the “late mapping” are *w*1
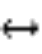
*f*1, *w*3
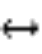
*f*3, and *w*4
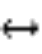
*f*5. Using this approach, we can thus classify ortholog pairs involved in any two-to-one fly-worm stage mappings into four categories: 1) ortholog pairs where both worm and fly genes are only involved in the “early mapping” (e.g. *w*2
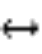
*f*2), 2) ortholog pairs where both worm and fly genes are only involved in the “late mapping” (e.g. *w*3
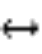
*f*3), 3) ortholog pairs involved in both “early mapping” and “late mapping” (e.g. *w*1
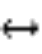
*f*1), and 4) ortholog pairs where the same worm gene but different fly genes are involved in the “early mapping” and “late mapping” respectively (e.g. *w*4
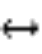
*f*4/*f*5). We did this classification for each of the columns “1”, “2” and “3” in Figure 5A (same as in Figure S12A) and summarized the results in Figure S12C, which shows that orthologs in all the four categories have contributed to the observed two-to-one fly-worm stage mappings. Hence, the answer to the second question is no: the “early mapping” and “late mapping” in a column are not due to the expression of the same fly-worm ortholog pairs. This again confirms that the genes in the purple category (Figure S12C), which would contribute to the within-fly stage mappings, are not the only reason for these two-to-one fly-worm stage mappings, and in fact the contribution of the purple category decreases from columns “1” and “2” to column “3”. Figure S12C also shows that the contribution of the brown category, i.e. many-to-one fly-worm orthologs, increases from column “1” to “3”. Since the fly genes in the brown category would not result in within-fly stage mappings, their roles in these two-to-one fly-worm stage mappings imply subfunctionalization of fly genes after duplication. To further quantify the contribution of the brown category to the two-to-one fly-worm stage mappings, we compared the fly and worm stages by using only one-to-one fly-worm orthologs, and the results are shown in Figure S12B. By comparing Figures S12A and S12B, we can see that their stage alignment results are generally the same but with slight differences. The main difference is that column “3” became negligible in Figure S12B, because its “early mapping” and “late mapping” in Figure S12A were largely attributable to the orthologs in category 4, which had no effect in Figure S12B. On the contrary, columns “1” and “2” become strengthened in Figure S12B, implying that they were mainly resulted from one-to-one fly-worm orthologs.

**SUPPLEMENTARY METHODS**

**Gene functional analysis**

We found major biological functions in our identified stage, tissue, and cell-associated genes by using the “Functional Annotation Clustering” feature of “the Database for Annotation, Visualization and Integrated Discovery” (DAVID v 6.7) (Huang, Sherman, & Lempicki, 2009). Given a gene list and background, e.g. stage-associated genes of fly embryo 0-2h stage (the gene list) and all fly protein-coding genes (the background), the enriched Biological Process (BP) Gene Ontology (GO) terms in the gene list were identified and clustered into functional clusters by DAVID. The clustering was based on a GO term distance measure defined as the similarity of the corresponding genes of any two GO terms. Given the GO clusters output by DAVID, we counted the observed number of genes associated with each GO cluster (i.e., gene count) in the gene list, and calculated an expected gene count by assuming that the gene list is a random sample from all genes. We then calculated a *p*-value for each GO cluster based on the null hypothesis that the observed gene count follows a hypergeometric distribution, and ranked the GO clusters by their *p*-values. Within each GO cluster, we also calculated the observed gene count, the expected gene count and the *p*-value for every GO term, and ranked the GO terms by their *p*-values. The GO clusters were named as the shortest GO term in the cluster. For the top 10 enriched GO terms we listed in Figures S7 and S11 and Tables S5A-B and S6A-B, some of the GO cluster names were manually curated (e.g., GO clusters with terms related to spindle organization and elongation were renamed as “translation”).

**FIGURE LEGENDS**

Figure S1. Life cycles of *D. melanogaster* and *C. elegans*. (A) Life cycle of *D. melanogaster* (modified with permission from FlyMove (Weigmann et al., 2003) by Dr. Christian Klämbt). (B) Life cycle of *C. elegans* (reprinted with permission from Wormatlas (Altun, Herndon, Crocker, Lints, & Hall, 2002) by Dr. David H. Hall and Dr. Zeynep F. Altun).

Figure S2. Distribution of the number of stage/tissue/cell-associated genes across different developmental stages, tissues and cells of *D. melanogaster* and *C. elegans*. The top panel (A-D) shows the number of associated genes (A) across all *D. melanogaster* developmental stages, (B) across all *C. elegans* developmental stages, (C) across all *D. melanogaster* tissues and cell lines, (D) across all *C. elegans* tissues and dissected cells. The bottom panel (E-G) shows the number of fly/worm associated genes that have orthologs in worm/fly (E) across all *D. melanogaster* developmental stages, (F) across all *C. elegans* developmental stages, (G) across all *D. melanogaster* tissues and cell lines, (H) across all *C. elegans* tissues and dissected cells. The gray scale shading of bars indicates the categorization of the associated genes based on the numbers of biological samples they are associated with. For detailed information on the stage, tissue, and cell labels, please refer to Table S2.

Figure S3. Comparison of *D. melanogaster* tissues and cell lines with the three gene categories (maternal, maternal/zygotic, and zygotic) defined in . More significant mapping scores are shown as darker color, corresponding to the scale showing –log10 transformed Bonferroni corrected *p*-values, which are calculated from the hypergeometric test in Figure 2A. Hierarchical clustering was applied to order the tissues and cell lines.

Figure S4. Enrichment patterns of biological process gene ontology (BP GO) terms in *D. melanogaster*: (A) the top enriched BP GO terms in early embryos and female adults, across all developmental stages; (B) the top enriched BP GO terms in ovaries (in red box), heads (in green box) or digestive system tissues (in orange box), across all tissues and cell lines. The enrichment scores are –log10 transformed Bonferroni corrected *p*-values from hypergeometric tests (see Methods). Hierarchical clustering was applied to order the tissues/cell lines in (B). Tissues from similar organs and cell lines are marked with colors. For detailed information on the stage/tissue/cell labels, please refer to Table S2.

Figure S5. Enrichment patterns of top enriched biological process gene ontology (BP GO) terms across *D. melanogaster* developmental stages. The enrichment scores are –log10 transformed Bonferroni corrected *p*-values from hypergeometric tests (see Methods). For detailed information on the stage/tissue/cell labels, please refer to Table S2.

Figure S6. Enrichment patterns of top enriched biological process gene ontology (BP GO) terms across *D. melanogaster* tissues and cell lines. The enrichment scores are –log10 transformed Bonferroni corrected *p*-values from hypergeometric tests (see Methods). Hierarchical clustering was applied to order the tissues/cell lines. Tissues from similar organs and cell lines are marked with colors. For detailed information on the stage/tissue/cell labels, please refer to Table S2.

Figure S7. Top 10 enriched GO clusters in (A) six example fly developmental stages and (B) six example fly tissues/cell lines. The heatmaps show the ratios of observed gene counts / expected gene counts of every GO cluster in every stage or tissue/cell line. The observed gene counts of the GO clusters in every example sample (stage or tissue/cell line) are also listed.

Figure S8. Enrichment patterns of top enriched biological process gene ontology terms across *C. elegans*: (A) the top enriched BP GO terms in early embryos and adults, across all developmental stages; (B) the top enriched BP GO terms in 4 cell stage embryos and adult gonad tissues, across all tissues and dissected cells. The enrichment scores are –log10 transformed Bonferroni corrected *p*-values from hypergeometric tests (see Methods). Hierarchical clustering was applied to order the tissues/cells in (B). Tissues and dissected cells from similar organs are marked with colors. For detailed information on the stage/tissue/cell labels, please refer to Table S2.

Figure S9. Enrichment patterns of top enriched biological process gene ontology (BP GO) terms across *C. elegans* developmental stages. The enrichment scores are –log10 transformed Bonferroni corrected *p*-values from hypergeometric tests (see Methods). For detailed information on the stage/tissue/cell labels, please refer to Table S2.

Figure S10. Enrichment patterns of top enriched biological process gene ontology (BP GO) terms across *C. elegans* tissues and dissected cells. The enrichment scores are –log10 transformed Bonferroni corrected *p*-values from hypergeometric tests (see Methods). Hierarchical clustering was applied to order the tissues/cells. Tissues and dissected cells from similar organs are marked with colors. For detailed information on the stage/tissue/cell labels, please refer to Table S2.

Figure S11. Top 10 enriched GO clusters in (A) six example worm developmental stages and (B) six example worm tissues/dissected cells. The heatmaps show the ratios of observed gene counts / expected gene counts of every GO cluster in every stage or tissue/dissected cell. The observed gene counts of the GO clusters in every example sample (stage or tissue/dissected cell) are also listed.

Figure S12. Interpretation of the two-to-one fly-worm stage mapping patterns. (A) Comparison between *D. melanogaster* and *C. elegans* developmental stages by using all ortholog pairs. The red, green and cyan boxes marked the three main two-to-one fly-worm stage mapping columns. (B) Comparison between *D. melanogaster* and *C. elegans* developmental stages by using only one-to-one ortholog pairs. The red, green and cyan boxes are in same positions as the corresponding boxes in (A). (C) Classification of ortholog-pairs based on their involvement in the “early mapping” (the lower block of fly stages) and “late mapping” (the upper block of fly stages) in each column (“1”, “2” or “3”) in (A).

Figure S13. Comparison results of developmental stages based on gene ontology (GO). Mapping scores shown in the heatmaps are –log10 transformed Bonferroni corrected *p*-values, whose calculation is described in Methods. (A) Stage comparison within *D. melanogaster*. (B) Stage comparison within *C. elegans*. (C) Stage comparison between *D. melanogaster* and *C. elegans*. For detailed information on the stage labels, please refer to Table S2.

Figure S14. Correlation analysis approaches for comparing developmental stages within *D. melanogaster* and *C. elegans*. Pearson and Spearman correlations are calculated based on all protein-coding gene expression levels in *D. melanogaster* or *C. elegans*. Larger correlations are shown as darker color, corresponding to the scale next to each panel. (A) Pearson correlation for every pair of *D. melanogaster* stages. (B) Pearson correlation for every pair of *C. elegans* stages. (C) Spearman correlation for every pair of *D. melanogaster* stages. (D) Spearman correlation for every pair of *C. elegans* stages. For detailed information on the stage labels, please refer to Table S2.

Figure S15. Comparison results of different developmental stages between *D. melanogaster* and *C. elegans* based on (A) modENCODE orthologs, same as Figure 5A, or (B) TreeFam (Li et al., 2006) orthologs. The results are highly similar.

**REFERENCES**

Altun, Z. F., Herndon, L. A., Crocker, C., Lints, R., & Hall, D. H. (2002). WormAtlas. Retrieved from http://www.wormatlas.org

Ashburner, M., Golic, K., & Hawley, R. S. (2005). Drosophila: A Laboratory Handbook. *Cold Spring Harbor Laboratory Press, Cold Spring Harbor, N.Y.* Retrieved May 14, 2014, from http://www.amazon.com/Drosophila-Laboratory-Handbook-Michael-Ashburner/dp/1936113694

Huang, D. W., Sherman, B. T., & Lempicki, R. A. (2009). Systematic and integrative analysis of large gene lists using DAVID bioinformatics resources. *Nature Protocols*, *4*(1), 44–57. doi:10.1038/nprot.2008.211

Li, H., Coghlan, A., Ruan, J., Coin, L. J., Hériché, J.-K., Osmotherly, L., … Durbin, R. (2006). TreeFam: a curated database of phylogenetic trees of animal gene families. *Nucleic Acids Research*, *34*(Database issue), D572–80. doi:10.1093/nar/gkj118

Weigmann, K., Klapper, R., Strasser, T., Rickert, C., Technau, G., Jäckle, H., … Klämbt, C. (2003). FlyMove--a new way to look at development of Drosophila. *Trends in Genetics : TIG*, *19*, 310–311. doi:10.1016/S0168-9525(03)00050-7
