# Supplementary material for: Comparison of D. melanogaster and C. elegans developmental stages, tissues, and cells by modENCODE RNA-seq data
Source: HighWire-hosted journal article supplement (doi:10.1101/gr.170100.113), 2014-07-01
Supplement: Supplemental_Files.zip [file TableS2 modENCODE RNA-Seq datasets (renamed).xlsx]

## Sheet: fly developmental stages
Species	Sample Name	SRA accesssion	Sample Description	Organ/Tissue	Age	Sex	Sample Type	Sequencing platform	Single- vs paired-end	Reads sequenced (M)	URL for mapped reads
D. melanogaster	Embryo0-2h	SRS004668	Embyros, 0-2 hour after egg laying	Whole organism	Embryo	Mixed Male/Female	RNA-seq	Illumina	paired	101	http://submit.modencode.org/submit/public/get_file/2898/extracted/BS40_all.SAM.gz
D. melanogaster	Embryo2-4h	SRS004669	Embyros, 2-4 hours after egg laying	Whole organism	Embryo	Mixed Male/Female	RNA-seq	Illumina	paired	80	http://submit.modencode.org/submit/public/get_file/2899/extracted/BS43_all.SAM.gz
D. melanogaster	Embryo4-6h	SRS004670	Embyros, 4-6 hours after egg laying	Whole organism	Embryo	Mixed Male/Female	RNA-seq	Illumina	paired	193	http://submit.modencode.org/submit/public/get_file/2900/extracted/BS46_all.SAM.gz
D. melanogaster	Embryo6-8h	SRS004671	Embyros, 6-8 hours after egg laying	Whole organism	Embryo	Mixed Male/Female	RNA-seq	Illumina	paired	119	http://submit.modencode.org/submit/public/get_file/2901/extracted/BS49_all.SAM.gz
D. melanogaster	Embryo8-10h	SRS004672	Embyros, 8-10 hours after egg laying	Whole organism	Embryo	Mixed Male/Female	RNA-seq	Illumina	paired	108	http://submit.modencode.org/submit/public/get_file/2902/extracted/BS54_all.SAM.gz
D. melanogaster	Embryo10-12h	SRS004673	Embyros, 10-12 hours after egg laying	Whole organism	Embryo	Mixed Male/Female	RNA-seq	Illumina	paired	139	http://submit.modencode.org/submit/public/get_file/2903/extracted/BS55_all.SAM.gz
D. melanogaster	Embryo12-14h	SRS004674	Embyros, 12-14 hours after egg laying	Whole organism	Embryo	Mixed Male/Female	RNA-seq	Illumina	paired	180	http://submit.modencode.org/submit/public/get_file/2904/extracted/BS58_all.SAM.gz
D. melanogaster	Embryo14-16h	SRS004675	Embyros, 14-16 hours after egg laying	Whole organism	Embryo	Mixed Male/Female	RNA-seq	Illumina	paired	137	http://submit.modencode.org/submit/public/get_file/2905/extracted/BS62_all.SAM.gz
D. melanogaster	Embryo16-18h	SRS004676	Embyros, 16-18 hours after egg laying	Whole organism	Embryo	Mixed Male/Female	RNA-seq	Illumina	paired	117	http://submit.modencode.org/submit/public/get_file/2906/extracted/BS66_all.SAM.gz
D. melanogaster	Embryo18-20h	SRS004677	Embyros, 18-20 hours after egg laying	Whole organism	Embryo	Mixed Male/Female	RNA-seq	Illumina	paired	127	http://submit.modencode.org/submit/public/get_file/2907/extracted/BS67_all.SAM.gz
D. melanogaster	Embryo20-22h	SRS004678	Embyros, 20-22 hours after egg laying	Whole organism	Embryo	Mixed Male/Female	RNA-seq	Illumina	paired	74	http://submit.modencode.org/submit/public/get_file/2908/extracted/BS71_all.SAM.gz
D. melanogaster	Embryo22-24h	SRS004679	Embyros, 22-24 hours after egg laying	Whole organism	Embryo	Mixed Male/Female	RNA-seq	Illumina	paired	155	http://submit.modencode.org/submit/public/get_file/2909/extracted/BS73_all.SAM.gz
D. melanogaster	L1	SRS004680	L1 stage larvae	Whole organism	L1	Mixed Male/Female	RNA-seq	Illumina	paired	126	http://submit.modencode.org/submit/public/get_file/2919/extracted/BS107_all.SAM.gz
D. melanogaster	L2	SRS004681	L2 stage larvae	Whole organism	L2	Mixed Male/Female	RNA-seq	Illumina	paired	189	http://submit.modencode.org/submit/public/get_file/2910/extracted/BS111_all.SAM.gz
D. melanogaster	L3+12h	SRS004682	L3 stage larvae, 12 hr post-molt	Whole organism	L3	Mixed Male/Female	RNA-seq	Illumina	paired	73	http://submit.modencode.org/submit/public/get_file/2911/extracted/BS113_all.SAM.gz
D. melanogaster	L3PS1-2	SRS004686	L3 stage larvae, dark blue gut, puff stage 1-2	Whole organism	L4	Mixed Male/Female	RNA-seq	Illumina	paired	80	http://submit.modencode.org/submit/public/get_file/2920/extracted/BS196_all.SAM.gz
D. melanogaster	L3PS3-6	SRS004687	L3 stage larvae, light blue gut, puff stage 3-6	Whole organism	L5	Mixed Male/Female	RNA-seq	Illumina	paired	73	http://submit.modencode.org/submit/public/get_file/2921/extracted/BS200_all.SAM.gz
D. melanogaster	L3PS7-9	SRS004867	L3 stage larvae, clear gut puff stage 7-9	Whole organism	L6	Mixed Male/Female	RNA-seq	Illumina	paired	103	http://submit.modencode.org/submit/public/get_file/2912/extracted/BS203_all.SAM.gz
D. melanogaster	Prepupae	SRS004868	White prepupae	Whole organism	Pupa	Mixed Male/Female	RNA-seq	Illumina	paired	114	http://submit.modencode.org/submit/public/get_file/2927/extracted/BS129_all.SAM.gz
D. melanogaster	Prepupae+12h	SRS004701	Pupae, 12 hours after white prepupae	Whole organism	Pupa	Mixed Male/Female	RNA-seq	Illumina	paired	129	http://submit.modencode.org/submit/public/get_file/2922/extracted/BS133_all.SAM.gz
D. melanogaster	Prepupae+24h	SRS004702	Pupae, 24 hours after white prepupae	Whole organism	Pupa	Mixed Male/Female	RNA-seq	Illumina	paired	105	http://submit.modencode.org/submit/public/get_file/2923/extracted/BS136_all.SAM.gz
D. melanogaster	Prepupae+2d	SRS004869	Pupae, 2 days after white prepupae	Whole organism	Pupa	Mixed Male/Female	RNA-seq	Illumina	paired	117	http://submit.modencode.org/submit/public/get_file/2924/extracted/BS137_all.SAM.gz
D. melanogaster	Prepupae+3d	SRS004870	Pupae, 3 days after white prepupae	Whole organism	Pupa	Mixed Male/Female	RNA-seq	Illumina	paired	154	http://submit.modencode.org/submit/public/get_file/2925/extracted/BS140_all.SAM.gz
D. melanogaster	Prepupae+4d	SRS004703	Pupae, 4 days after white prepupae	Whole organism	Pupa	Mixed Male/Female	RNA-seq	Illumina	paired	106	http://submit.modencode.org/submit/public/get_file/2926/extracted/BS143_all.SAM.gz
D. melanogaster	Male+1d	SRS004695	Adult male, one day after eclosion	Whole organism	Adult	Male	RNA-seq	Illumina	paired	112	http://submit.modencode.org/submit/public/get_file/2916/extracted/BS150_all.SAM.gz
D. melanogaster	Male+5d	SRS004696	Adult male, 5 days after eclosion	Whole organism	Adult	Male	RNA-seq	Illumina	paired	123	http://submit.modencode.org/submit/public/get_file/2918/extracted/BS156_all.SAM.gz
D. melanogaster	Male+30d	SRS004697	Adult male, 30 days after eclosion	Whole organism	Adult	Male	RNA-seq	Illumina	paired	104	http://submit.modencode.org/submit/public/get_file/2917/extracted/BS162_all.SAM.gz
D. melanogaster	Female+1d	SRS004689	Adult female, one day after eclosion	Whole organism	Adult	Female	RNA-seq	Illumina	paired	122	http://submit.modencode.org/submit/public/get_file/2913/extracted/BS153_all.SAM.gz
D. melanogaster	Female+5d	SRS004693	Adult female, 5 days after eclosion	Whole organism	Adult	Female	RNA-seq	Illumina	paired	91	http://submit.modencode.org/submit/public/get_file/2915/extracted/BS159_all.SAM.gz
D. melanogaster	Female+30d	SRS004692	Adult female, 30 days after eclosion	Whole organism	Adult	Female	RNA-seq	Illumina	paired	90	http://submit.modencode.org/submit/public/get_file/2914/extracted/BS165_all.SAM.gz

## Sheet: fly tissues and cell lines
Species	Sample Name	SRA accesssion	Sample Description	Tissue/Cell Line	Organ/Tissue	Age	Sex	Sample Type	Sequencing platform	Single- vs paired-end	Reads sequenced (M)	URL for mapped reads
D. melanogaster	CarcassL3	SRR100269, SRR070426	third instar larvae, wandering stage, carcass	tissue	Muscle	L3	Mixed Male/Female	RNA-seq	Illumina	paired	88	http://submit.modencode.org/submit/public/get_file/3465/extracted/BS312_61KE0AAXX_lane5_all.sorted.bam; http://submit.modencode.org/submit/public/get_file/3465/extracted/BS311_6137YAAXX_lane6_all.sorted.bam
D. melanogaster	CarcassMixedMaleFemale+1d	SRR070395, SRR070399	mixed males and females, eclosion + 1 day, carcass	tissue	Muscle	Adult	Mixed Male/Female	RNA-seq	Illumina	paired	115	http://submit.modencode.org/submit/public/get_file/3446/extracted/BS250_61FGCAAXX_lane2_all.sorted.bam; http://submit.modencode.org/submit/public/get_file/3446/extracted/BS249_61F4LAAXX_lane2_all.sorted.bam
D. melanogaster	CarcassMixedMaleFemale+4d	SRR070387, SRR070402	mixed males and females, eclosion + 4 days, carcass	tissue	Muscle	Adult	Mixed Male/Female	RNA-seq	Illumina	paired	92	http://submit.modencode.org/submit/public/get_file/3455/extracted/BS282_61FGCAAXX_lane5_all.sorted.bam; http://submit.modencode.org/submit/public/get_file/3455/extracted/BS281_61F2CAAXX_lane2_all.sorted.bam
D. melanogaster	CarcassMixedMaleFemale+20d	SRR070391, SRR070404	mixed males and females, eclosion + 20 days, carcass	tissue	Muscle	Adult	Mixed Male/Female	RNA-seq	Illumina	paired	64	http://submit.modencode.org/submit/public/get_file/3460/extracted/BS296_61F2CAAXX_lane6_all.sorted.bam; http://submit.modencode.org/submit/public/get_file/3460/extracted/BS297_61FGCAAXX_lane7_all.sorted.bam
D. melanogaster	FatL3	SRR070405, SRR070406	third instar larvae, wandering stage, fat body	tissue	Endocrine/Liver	L3	Mixed Male/Female	RNA-seq	Illumina	paired	61	http://submit.modencode.org/submit/public/get_file/3461/extracted/BS301_61FGYAAXX_lane1_all.sorted.bam; http://submit.modencode.org/submit/public/get_file/3461/extracted/BS300_61FGCAAXX_lane8_all.sorted.bam
D. melanogaster	FatPrepupae	SRR070411, SRR070428	white prepupae, fat body	tissue	Endocrine/Liver	L4/Pupa	Mixed Male/Female	RNA-seq	Illumina	paired	93	http://submit.modencode.org/submit/public/get_file/3468/extracted/BS320_61FGYAAXX_lane6_all.sorted.bam; http://submit.modencode.org/submit/public/get_file/3468/extracted/BS321_61KE0AAXX_lane7_all.sorted.bam
D. melanogaster	FatPrepupae+2d	SRR070429,SRR070413	pupae, white prepupae+2d, fat	tissue	Endocrine/Liver	L4/Pupa	Mixed Male/Female	RNA-seq	Illumina	paired	55	http://submit.modencode.org/submit/public/get_file/3470/extracted/BS326_61KE0AAXX_lane8_all.sorted.bam; http://submit.modencode.org/submit/public/get_file/3470/extracted/BS327_61FGYAAXX_lane8_all.sorted.bam
D. melanogaster	SalivaryGlandsL3	SRR070425, SRR070407	third instar larvae, wandering stage, salivary glands	tissue	Exocrine gland	L3	Mixed Male/Female	RNA-seq	Illumina	paired	83	http://submit.modencode.org/submit/public/get_file/3463/extracted/BS305_61KE0AAXX_lane4_all.sorted.bam; http://submit.modencode.org/submit/public/get_file/3463/extracted/BS306_61FGYAAXX_lane2_all.sorted.bam
D. melanogaster	SalivaryGlandsPrepupae	SRR070427, SRR100270	white prepupae, salivary glands	tissue	Exocrine gland	L4/Pupa	Mixed Male/Female	RNA-seq	Illumina	paired	94	http://submit.modencode.org/submit/public/get_file/3467/extracted/BS318_6137YAAXX_lane7_all.sorted.bam; http://submit.modencode.org/submit/public/get_file/3467/extracted/BS317_61KE0AAXX_lane6_all.sorted.bam
D. melanogaster	DigestiveSystemL3	SRR100268, SRR070408	third instar larvae, wandering stage, digestive system	tissue	Gut	L3	Mixed Male/Female	RNA-seq	Illumina	paired	94	http://submit.modencode.org/submit/public/get_file/3464/extracted/BS308_6137YAAXX_lane5_all.sorted.bam; http://submit.modencode.org/submit/public/get_file/3464/extracted/BS309_61FGYAAXX_lane3_all.sorted.bam
D. melanogaster	DigestiveSystemMixedMaleFemale+1d	SRR070394, SRR070398	mixed males and females, eclosion + 1 day, digestive system	tissue	Gut	Adult	Mixed Male/Female	RNA-seq	Illumina	paired	60	http://submit.modencode.org/submit/public/get_file/3445/extracted/BS247_61FGCAAXX_lane1_all.sorted.bam; http://submit.modencode.org/submit/public/get_file/3445/extracted/BS246_61F4LAAXX_lane1_all.sorted.bam
D. melanogaster	DigestiveSystemMixedMaleFemale+4d	SRR070401, SRR070386, SRR111878, SRR111879	mixed males and females, eclosion + 4 days, digestive system	tissue	Gut	Adult	Mixed Male/Female	RNA-seq	Illumina	paired	165	http://submit.modencode.org/submit/public/get_file/3454/extracted/BS279_61F2CAAXX_lane1_all.sorted.bam; http://submit.modencode.org/submit/public/get_file/3454/extracted/BS278_61FGCAAXX_lane4_all.sorted.bam; http://submit.modencode.org/submit/public/get_file/3454/extracted/BS279_6274BAAXX_lane2_all.sorted.bam; http://submit.modencode.org/submit/public/get_file/3454/extracted/BS279_6274BAAXX_lane1…
D. melanogaster	DigestiveSystemMixedMaleFemale+20d	SRR070403, SRR070390, SRR111883	mixed males and females, eclosion + 20 days, digestive system	tissue	Gut	Adult	Mixed Male/Female	RNA-seq	Illumina	paired	106	http://submit.modencode.org/submit/public/get_file/3459/extracted/BS293_61FGCAAXX_lane6_all.sorted.bam; http://submit.modencode.org/submit/public/get_file/3459/extracted/BS294_61F2CAAXX_lane5_all.sorted.bam; http://submit.modencode.org/submit/public/get_file/3459/extracted/BS294_6274BAAXX_lane6_all.sorted.bam
D. melanogaster	ImaginalDiscsL3	SRR070392, SRR111884, SRR350962, SRR070393, SRR111885, SRR350963	third instar larvae, wandering stage, imaginal discs	tissue	Epithelial	L3	Mixed Male/Female	RNA-seq	Illumina	paired	415	http://submit.modencode.org/submit/public/get_file/3462/extracted/BS304_61F2CAAXX_lane8_all.sorted.bam; http://submit.modencode.org/submit/public/get_file/3462/extracted/BS303_6274BAAXX_lane7_all.sorted.bam; http://submit.modencode.org/submit/public/get_file/3462/extracted/BS303_61F2CAAXX_lane7_all.sorted.bam; http://submit.modencode.org/submit/public/get_file/3462/extracted/BS304_6274BAAXX_lane8…
D. melanogaster	CNSL3	SRR070409, SRR070410	third instar larvae, CNS	tissue	Neural	L3	Mixed Male/Female	RNA-seq	Illumina	paired	62	http://submit.modencode.org/submit/public/get_file/3466/extracted/BS314_61FGYAAXX_lane4_all.sorted.bam; http://submit.modencode.org/submit/public/get_file/3466/extracted/BS315_61FGYAAXX_lane5_all.sorted.bam
D. melanogaster	CNSPrepupae+2d	SRR100271, SRR070412	pupae, white prepupae+2d, CNS	tissue	Neural	L4/Pupa	Mixed Male/Female	RNA-seq	Illumina	paired	104	http://submit.modencode.org/submit/public/get_file/3469/extracted/BS323_6137YAAXX_lane8_all.sorted.bam; http://submit.modencode.org/submit/public/get_file/3469/extracted/BS324_61FGYAAXX_lane7_all.sorted.bam
D. melanogaster	HeadsVirginFemale+1d	SRR070436, SRR070437, SRR100281	virgin female, eclosion + 1 day, heads	tissue	Neural	Adult	Female	RNA-seq	Illumina	paired	278	http://submit.modencode.org/submit/public/get_file/3442/extracted/BS234_61RWKAAXX_lane8_all.sorted.bam; http://submit.modencode.org/submit/public/get_file/3442/extracted/BS234_61RWKAAXX_lane7_all.sorted.bam; http://submit.modencode.org/submit/public/get_file/3442/extracted/BS235_B80DRJABXX_lane3_all.sorted.bam
D. melanogaster	HeadsVirginFemale+4d	SRR070430, SRR100278, SRR100282	virgin female, eclosion + 4 days, heads	tissue	Neural	Adult	Female	RNA-seq	Illumina	paired	253	http://submit.modencode.org/submit/public/get_file/3447/extracted/BS252_61RWKAAXX_lane1_all.sorted.bam; http://submit.modencode.org/submit/public/get_file/3447/extracted/BS252_62JBPAAXX_lane8_all.sorted.bam; http://submit.modencode.org/submit/public/get_file/3447/extracted/BS253_B80DRJABXX_lane4_all.sorted.bam
D. melanogaster	HeadsVirginFemale+20d	SRR070388, SRR070419, SRR100275	virgin female, eclosion + 20 days, heads	tissue	Neural	Adult	Female	RNA-seq	Illumina	paired	114	http://submit.modencode.org/submit/public/get_file/3456/extracted/BS284_61F2CAAXX_lane3_all.sorted.bam; http://submit.modencode.org/submit/public/get_file/3456/extracted/BS285_61KDLAAXX_lane6_all.sorted.bam; http://submit.modencode.org/submit/public/get_file/3456/extracted/BS285_62JBPAAXX_lane5_all.sorted.bam
D. melanogaster	HeadsMatedFemale+1d	SRR070434, SRR070435, SRR100279	mated female, eclosion + 1 day, heads	tissue	Neural	Adult	Female	RNA-seq	Illumina	paired	264	http://submit.modencode.org/submit/public/get_file/3443/extracted/BS238_61RWKAAXX_lane5_all.sorted.bam; http://submit.modencode.org/submit/public/get_file/3443/extracted/BS238_61RWKAAXX_lane6_all.sorted.bam; http://submit.modencode.org/submit/public/get_file/3443/extracted/BS239_B80DRJABXX_lane1_all.sorted.bam
D. melanogaster	HeadsMatedFemale+4d	SRR070414, SRR070415	mated female, eclosion + 4 days, heads	tissue	Neural	Adult	Female	RNA-seq	Illumina	paired	138	http://submit.modencode.org/submit/public/get_file/3448/extracted/BS258_61KDLAAXX_lane2_all.sorted.bam; http://submit.modencode.org/submit/public/get_file/3448/extracted/BS257_61KDLAAXX_lane1_all.sorted.bam
D. melanogaster	HeadsMatedFemale+20d	SRR116383, SRR111882, SRR070420, SRR100274	mated female, eclosion + 20 days, heads	tissue	Neural	Adult	Female	RNA-seq	Illumina	paired	71	http://submit.modencode.org/submit/public/get_file/3457/extracted/BS287_61F2CAAXX_lane4_all.sorted.bam; http://submit.modencode.org/submit/public/get_file/3457/extracted/BS287_6274BAAXX_lane5_all.sorted.bam; http://submit.modencode.org/submit/public/get_file/3457/extracted/BS288_61KDLAAXX_lane7_all.sorted.bam; http://submit.modencode.org/submit/public/get_file/3457/extracted/BS288_62JBPAAXX_lane4…
D. melanogaster	HeadsMatedMale+1d	SRR070432, SRR070433, SRR100280	mated male, eclosion + 1 day, heads	tissue	Neural	Adult	Male	RNA-seq	Illumina	paired	196	http://submit.modencode.org/submit/public/get_file/3444/extracted/BS242_61RWKAAXX_lane3_all.sorted.bam; http://submit.modencode.org/submit/public/get_file/3444/extracted/BS242_61RWKAAXX_lane4_all.sorted.bam; http://submit.modencode.org/submit/public/get_file/3444/extracted/BS243_B80DRJABXX_lane2_all.sorted.bam
D. melanogaster	HeadsMatedMale+4d	SRR070416, SRR070400	mated male, eclosion + 4 days, heads	tissue	Neural	Adult	Male	RNA-seq	Illumina	paired	127	http://submit.modencode.org/submit/public/get_file/3449/extracted/BS261_61FGCAAXX_lane3_all.sorted.bam; http://submit.modencode.org/submit/public/get_file/3449/extracted/BS260_61KDLAAXX_lane3_all.sorted.bam
D. melanogaster	HeadsMatedMale+20d	SRR070421, SRR070424	mated male, eclosion + 20 days, heads	tissue	Neural	Adult	Male	RNA-seq	Illumina	paired	105	http://submit.modencode.org/submit/public/get_file/3458/extracted/BS290_61KDLAAXX_lane8_all.sorted.bam; http://submit.modencode.org/submit/public/get_file/3458/extracted/BS291_61KE0AAXX_lane3_all.sorted.bam
D. melanogaster	OvariesVirginFemale+4d	SRR070396, SRR070417	virgin female, eclosion + 4 days, ovaries	tissue	Gonad	Adult	Female	RNA-seq	Illumina	paired	115	http://submit.modencode.org/submit/public/get_file/3450/extracted/BS264_61F4LAAXX_lane3_all.sorted.bam; http://submit.modencode.org/submit/public/get_file/3450/extracted/BS265_61KDLAAXX_lane4_all.sorted.bam
D. melanogaster	OvariesMatedFemale+4d	SRR070431, SRR100277, SRR100283	mated female, eclosion + 4 days, ovaries	tissue	Gonad	Adult	Female	RNA-seq	Illumina	paired	273	http://submit.modencode.org/submit/public/get_file/3451/extracted/BS268_62JBPAAXX_lane7_all.sorted.bam; http://submit.modencode.org/submit/public/get_file/3451/extracted/BS268_61RWKAAXX_lane2_all.sorted.bam; http://submit.modencode.org/submit/public/get_file/3451/extracted/BS269_B80DRJABXX_lane5_all.sorted.bam
D. melanogaster	TestesMatedMale+4d	SRR070422, SRR350960, SRR070423, SRR100276, SRR350961	mated male, eclosion + 4 days, testes	tissue	Gonad	Adult	Male	RNA-seq	Illumina	paired	473	http://submit.modencode.org/submit/public/get_file/3452/extracted/BS273_62JBPAAXX_lane6_all.sorted.bam; http://submit.modencode.org/submit/public/get_file/3452/extracted/BS273_61KE0AAXX_lane2_all.sorted.bam; http://submit.modencode.org/submit/public/get_file/3452/extracted/BS272_61KE0AAXX_lane1_all.sorted.bam
D. melanogaster	AccessoryGlandsMatedMale+4d	SRR070397, SRR111880, SRR182357, SRR070418, SRR100272, SRR100273, SRR111881, SRR182358, SRR350959	mated male, eclosion + 4 days, accessory glands	tissue	Gonad	Adult	Male	RNA-seq	Illumina	paired	107	http://submit.modencode.org/submit/public/get_file/3453/extracted/BS275_61F4LAAXX_lane4_all.sorted.bam; http://submit.modencode.org/submit/public/get_file/3453/extracted/BS275_61PLYAAXX_lane1_all.sorted.bam; http://submit.modencode.org/submit/public/get_file/3453/extracted/BS275_6274BAAXX_lane3_all.sorted.bam; http://submit.modencode.org/submit/public/get_file/3453/extracted/BS276_61KDLAAXX_lane5…
D. melanogaster	(Embryo) 1182-4H	SRR070272	cell line 1182-4H from embryos	cell line	N.D.	Embryo	N.D.	RNA-seq	Illumina	paired	50	http://submit.modencode.org/submit/public/get_file/3471/extracted/1182-4H_61D99AAXX_lane2_all.sorted.bam
D. melanogaster	(Embryo) GM2	SRR070278, SRR070265, SRR070263	cell line GM2 from embryos	cell line	N.D.	Embryo	N.D.	RNA-seq	Illumina	single/paired	65	http://submit.modencode.org/submit/public/get_file/3473/extracted/GM2_61F2JAAXX_1_all.sorted.bam; http://submit.modencode.org/submit/public/get_file/3473/extracted/GM2_615JCAAXX_lane2_all.sorted.bam
D. melanogaster	(Embryo) Kc167	SRR070261, SRR070269, SRR111873, SRR070292	cell line Kc167 from embryos	cell line	N.D.	Embryo	Female	RNA-seq	Illumina	single/paired	56	http://submit.modencode.org/submit/public/get_file/3493/extracted/Kc167_62Y4MAAXX_lane7_all.sorted.bam; http://submit.modencode.org/submit/public/get_file/3493/extracted/Kc167_42UJ9AAXX_7_all.sorted.bam; http://submit.modencode.org/submit/public/get_file/3493/extracted/Kc167_615JCAAXX_lane6_all.sorted.bam
D. melanogaster	(Embryo) S1	SRR070280, SRR070286, SRR111877	cell line S1 from embryos	cell line	N.D.	Embryo	N.D.	RNA-seq	Illumina	single/paired	48	http://submit.modencode.org/submit/public/get_file/3486/extracted/S1_61K8TAAXX_1_all.sorted.bam; http://submit.modencode.org/submit/public/get_file/3486/extracted/S1_61K8WAAXX_lane1_all.sorted.bam; http://submit.modencode.org/submit/public/get_file/3486/extracted/S1_70GEEAAXX_lane3_all.sorted.bam
D. melanogaster	(Embryo) S3	SRR070259, SRR111872, SRR189834, SRR189835	cell line S3 from embryos	cell line	N.D.	Embryo	N.D.	RNA-seq	Illumina	single/paired	132	http://submit.modencode.org/submit/public/get_file/3494/extracted/S3_62W20AAXX_lane7_all.sorted.bam; http://submit.modencode.org/submit/public/get_file/3494/extracted/S3_62W20AAXX_lane8_all.sorted.bam; http://submit.modencode.org/submit/public/get_file/3494/extracted/S3_42UJ9AAXX_5_all.sorted.bam; http://submit.modencode.org/submit/public/get_file/3494/extracted/S3_62Y4MAAXX_lane6_all.sorted.bam
D. melanogaster	(Embryo) Sg4	SRR070271	cell line Sg4 from embryos	cell line	N.D.	Embryo	N.D.	RNA-seq	Illumina	paired	44	http://submit.modencode.org/submit/public/get_file/3488/extracted/Sg4_61D99AAXX_lane1_all.sorted.bam
D. melanogaster	(L3 prothoracic leg disc) CME_L1	SRR070282, SRR070288	cell line CME_L1 from L3 larva prothoracic leg discs	cell line	ventral prothoracic disc	L3	N.D.	RNA-seq	Illumina	single/paired	84	http://submit.modencode.org/submit/public/get_file/3476/extracted/CME_L1_61K8TAAXX_3_all.sorted.bam; http://submit.modencode.org/submit/public/get_file/3476/extracted/CME_L1_61K8WAAXX_lane3_all.sorted.bam
D. melanogaster	(L3 eye-antennal disc) ML-DmD11	SRR070284, SRR070290, SRR111874	cell line ML-DmD11 from L3 larva eye-antennal discs	cell line	eye-antennal disc	L3	N.D.	RNA-seq	Illumina	single/paired	43	http://submit.modencode.org/submit/public/get_file/3478/extracted/ML-DmD11_61K8TAAXX_5_all.sorted.bam; http://submit.modencode.org/submit/public/get_file/3478/extracted/ML-DmD11_62Y4MAAXX_lane8_all.sorted.bam; http://submit.modencode.org/submit/public/get_file/3478/extracted/ML-DmD11_61K8WAAXX_lane5_all.sorted.bam
D. melanogaster	(L3 wing disc) CME_W2	SRR070260, SRR070268, SRR111868	cell line CME_W2 from L3 larva wing discs	cell line	dorsal mesothoracic disc	L3	N.D.	RNA-seq	Illumina	single/paired	77	http://submit.modencode.org/submit/public/get_file/3472/extracted/CME_W2_42UJ9AAXX_6_all.sorted.bam; http://submit.modencode.org/submit/public/get_file/3472/extracted/CME_W2_615JCAAXX_lane5_all.sorted.bam; http://submit.modencode.org/submit/public/get_file/3472/extracted/CME_W2_62Y4MAAXX_lane1_all.sorted.bam
D. melanogaster	(L3 wing disc) ML-DmD8	SRR070277	cell line ML-DmD8 from L3 larva wing discs	cell line	dorsal mesothoracic disc	L3	N.D.	RNA-seq	Illumina	paired	37	http://submit.modencode.org/submit/public/get_file/3484/extracted/ML-DmD8_61D99AAXX_lane7_all.sorted.bam
D. melanogaster	(L3 wing disc) ML-DmD9	SRR070274	cell line ML-DmD9 from L3 larva wing discs	cell line	dorsal mesothoracic disc	L3	N.D.	RNA-seq	Illumina	paired	56	http://submit.modencode.org/submit/public/get_file/3485/extracted/ML-DmD9_61D99AAXX_lane4_all.sorted.bam
D. melanogaster	(L3 wing disc) ML-DmD16-c3	SRR070283, SRR070289	cell line ML-DmD16-c3 from L3 larva wing discs	cell line	dorsal mesothoracic disc	L3	N.D.	RNA-seq	Illumina	single/paired	56	http://submit.modencode.org/submit/public/get_file/3479/extracted/ML-DmD16-c3_61K8WAAXX_lane4_all.sorted.bam; http://submit.modencode.org/submit/public/get_file/3479/extracted/ML-DmD16-c3_61K8TAAXX_4_all.sorted.bam
D. melanogaster	(L3 wing disc) ML-DmD21	SRR070276	cell line ML-DmD21 from L3 larva wing discs	cell line	dorsal mesothoracic disc	L3	N.D.	RNA-seq	Illumina	paired	55	http://submit.modencode.org/submit/public/get_file/3481/extracted/ML-DmD21_61D99AAXX_lane6_all.sorted.bam
D. melanogaster	(L3 wing disc) ML-DmD32	SRR070281, SRR070287, SRR111875	cell line ML-DmD32 from L3 larva wing discs	cell line	dorsal mesothoracic disc	L3	N.D.	RNA-seq	Illumina	single/paired	38	http://submit.modencode.org/submit/public/get_file/3482/extracted/ML-DmD32_61K8WAAXX_lane2_all.sorted.bam; http://submit.modencode.org/submit/public/get_file/3482/extracted/ML-DmD32_61K8TAAXX_2_all.sorted.bam; http://submit.modencode.org/submit/public/get_file/3482/extracted/ML-DmD32_70GEEAAXX_lane1_all.sorted.bam
D. melanogaster	(L3 haltere disc) ML-DmD17-c3	SRR070285, SRR070291	cell line ML-DmD17-c3 from L3 larva haltere discs	cell line	dorsal metathoracic disc	L3	N.D.	RNA-seq	Illumina	single/paired	87	http://submit.modencode.org/submit/public/get_file/3480/extracted/ML-DmD17-c3_61K8TAAXX_6_all.sorted.bam; http://submit.modencode.org/submit/public/get_file/3480/extracted/ML-DmD17-c3_61K8WAAXX_lane6_all.sorted.bam
D. melanogaster	(L3 mixed imaginal discs) ML-DmD4-c1	SRR070273, SRR111876	cell line ML-DmD4-c1 from L3 larva mixed imaginal discs	cell line	imaginal disc	L3	N.D.	RNA-seq	Illumina	paired	116	http://submit.modencode.org/submit/public/get_file/3483/extracted/ML-DmD4-c1_70GEEAAXX_lane2_all.sorted.bam; http://submit.modencode.org/submit/public/get_file/3483/extracted/ML-DmD4-c1_61D99AAXX_lane3_all.sorted.bam
D. melanogaster	(L3 CNS) ML-DmBG1-c1	SRR070275	cell line ML-DmBG1-c1 from L3 larva CNS	cell line	central nervous system	L3	N.D.	RNA-seq	Illumina	paired	36	http://submit.modencode.org/submit/public/get_file/3477/extracted/ML-DmBG1-c1_61D99AAXX_lane5_all.sorted.bam
D. melanogaster	(L3 CNS) ML-DmBG2-c2	SRR070262, SRR070270, SRR111870	cell line ML-DmBG2-c2 from L3 larva CNS	cell line	central nervous system	L3	N.D.	RNA-seq	Illumina	single/paired	35	http://submit.modencode.org/submit/public/get_file/3474/extracted/ML-DmBG2-c2_42UJ9AAXX_8_all.sorted.bam; http://submit.modencode.org/submit/public/get_file/3474/extracted/ML-DmBG2-c2_615JCAAXX_lane7_all.sorted.bam; http://submit.modencode.org/submit/public/get_file/3474/extracted/ML-DmBG2-c2_62Y4MAAXX_lane3_all.sorted.bam
D. melanogaster	(Tumorous blood cells) MBN2	SRR070258, SRR111869, SRR189833	cell line MBN2 from tumorous blood cells	cell line	larval circulatory system - tumorous blood cell	L3	N.D.	RNA-seq	Illumina	single/paired	75	http://submit.modencode.org/submit/public/get_file/3492/extracted/MBN2_62Y4MAAXX_lane2_all.sorted.bam; http://submit.modencode.org/submit/public/get_file/3492/extracted/MBN2_62W20AAXX_lane6_all.sorted.bam; http://submit.modencode.org/submit/public/get_file/3492/extracted/MBN2_42UJ9AAXX_4_all.sorted.bam

## Sheet: worm developmental stages
Species	Sample Name	Annotated Name	SRA accesssion	Sample Description	Organ/Tissue	Age	Sex	Sample Type	Sequencing platform	Single- vs paired-end	Reads sequenced (M)	URL for mapped reads
C. elegans	EE_50-0	embryo 0 mins	SRS258165	N2 embryonic time point data, polyA+ RNAseq - make eggs, hatch in absence of food to L1 arrest, add food, wait 50 hours, harvest eggs, incubate 0 minutes	Whole organism	Embryo	hermaphrodite	RNA-seq	Illumina	paired	34	http://submit.modencode.org/submit/public/get_file/3981/extracted/N2_EE_50-0.sam.gz
C. elegans	EE_50-30	embryo 30 mins	SRS258085	N2 embryonic time point data, polyA+ RNAseq - make eggs, hatch in absence of food to L1 arrest, add food, wait 50 hours, harvest eggs, incubate 30 minutes	Whole organism	Embryo	hermaphrodite	RNA-seq	Illumina	paired	21	http://submit.modencode.org/submit/public/get_file/3982/extracted/N2_EE_50-30.sam.gz
C. elegans	EE_50-60	embryo 60 mins	SRS242229	N2 embryonic time point data, polyA+ RNAseq - make eggs, hatch in absence of food to L1 arrest, add food, wait 50 hours, harvest eggs, incubate 60 minutes	Whole organism	Embryo	hermaphrodite	RNA-seq	Illumina	paired	19	http://submit.modencode.org/submit/public/get_file/3983/extracted/N2_EE_50-60.sam.gz
C. elegans	EE_50-90	embryo 90 mins	SRS258166	N2 embryonic time point data, polyA+ RNAseq - make eggs, hatch in absence of food to L1 arrest, add food, wait 50 hours, harvest eggs, incubate 90 minutes	Whole organism	Embryo	hermaphrodite	RNA-seq	Illumina	paired	44	http://submit.modencode.org/submit/public/get_file/3984/extracted/N2_EE_50-90.sam.gz
C. elegans	EE_50-120	embryo 120 mins	SRS242382	N2 embryonic time point data, polyA+ RNAseq - make eggs, hatch in absence of food to L1 arrest, add food, wait 50 hours, harvest eggs, incubate 120 minutes	Whole organism	Embryo	hermaphrodite	RNA-seq	Illumina	paired	28	http://submit.modencode.org/submit/public/get_file/3985/extracted/N2_EE_50-120.sam.gz
C. elegans	EE_50-150	embryo 150 mins	SRS266274	N2 embryonic time point data, polyA+ RNAseq - make eggs, hatch in absence of food to L1 arrest, add food, wait 50 hours, harvest eggs, incubate 150 minutes	Whole organism	Embryo	hermaphrodite	RNA-seq	Illumina	paired	24	http://submit.modencode.org/submit/public/get_file/3986/extracted/N2_EE_50-150.sam.gz
C. elegans	EE_50-180	embryo 180 mins	SRS266269	N2 embryonic time point data, polyA+ RNAseq - make eggs, hatch in absence of food to L1 arrest, add food, wait 50 hours, harvest eggs, incubate 180 minutes	Whole organism	Embryo	hermaphrodite	RNA-seq	Illumina	paired	44	http://submit.modencode.org/submit/public/get_file/3987/extracted/N2_EE_50-180.sam.gz
C. elegans	EE_50-210	embryo 210 mins	SRS266275	N2 embryonic time point data, polyA+ RNAseq - make eggs, hatch in absence of food to L1 arrest, add food, wait 50 hours, harvest eggs, incubate 210 minutes	Whole organism	Embryo	hermaphrodite	RNA-seq	Illumina	paired	17	http://submit.modencode.org/submit/public/get_file/6440/extracted/N2_EE_50-210.1112.sam.gz.bam.sorted.bam
C. elegans	EE_50-240	embryo 240 mins	SRS266270	N2 embryonic time point data, polyA+ RNAseq - make eggs, hatch in absence of food to L1 arrest, add food, wait 50 hours, harvest eggs, incubate 240 minutes	Whole organism	Embryo	hermaphrodite	RNA-seq	Illumina	paired	17	http://submit.modencode.org/submit/public/get_file/3989/extracted/N2_EE_50-240.sam.gz
C. elegans	EE_50-300	embryo 300 mins	SRS266880	N2 embryonic time point data, polyA+ RNAseq - make eggs, hatch in absence of food to L1 arrest, add food, wait 50 hours, harvest eggs, incubate 300 minutes	Whole organism	Embryo	hermaphrodite	RNA-seq	Illumina	paired	22	http://submit.modencode.org/submit/public/get_file/3991/extracted/N2_EE_50-300.sam.gz
C. elegans	EE_50-330	embryo 330 mins	SRS266265	N2 embryonic time point data, polyA+ RNAseq - make eggs, hatch in absence of food to L1 arrest, add food, wait 50 hours, harvest eggs, incubate 330 minutes	Whole organism	Embryo	hermaphrodite	RNA-seq	Illumina	paired	20	http://submit.modencode.org/submit/public/get_file/3992/extracted/N2_EE_50-330.sam.gz
C. elegans	EE_50-360	embryo 360 mins	SRS266266	N2 embryonic time point data, polyA+ RNAseq - make eggs, hatch in absence of food to L1 arrest, add food, wait 50 hours, harvest eggs, incubate 360 minutes	Whole organism	Embryo	hermaphrodite	RNA-seq	Illumina	paired	19	http://submit.modencode.org/submit/public/get_file/3993/extracted/N2_EE_50-360.sam.gz
C. elegans	EE_50-390	embryo 390 mins	SRS266267	N2 embryonic time point data, polyA+ RNAseq - make eggs, hatch in absence of food to L1 arrest, add food, wait 50 hours, harvest eggs, incubate 390 minutes	Whole organism	Embryo	hermaphrodite	RNA-seq	Illumina	paired	19	http://submit.modencode.org/submit/public/get_file/3994/extracted/N2_EE_50-390.sam.gz
C. elegans	EE_50-420	embryo 420 mins	SRS266268	N2 embryonic time point data, polyA+ RNAseq - make eggs, hatch in absence of food to L1 arrest, add food, wait 50 hours, harvest eggs, incubate 420 minutes	Whole organism	Embryo	hermaphrodite	RNA-seq	Illumina	paired	21	http://submit.modencode.org/submit/public/get_file/3995/extracted/N2_EE_50-420.sam.gz
C. elegans	EE_50-450	embryo 450 mins	SRS266277	N2 embryonic time point data, polyA+ RNAseq - make eggs, hatch in absence of food to L1 arrest, add food, wait 50 hours, harvest eggs, incubate 450 minutes	Whole organism	Embryo	hermaphrodite	RNA-seq	Illumina	paired	34	http://submit.modencode.org/submit/public/get_file/3996/extracted/N2_EE_50-450.sam.gz
C. elegans	EE_50-480	embryo 480 mins	SRS266271	N2 embryonic time point data, polyA+ RNAseq - make eggs, hatch in absence of food to L1 arrest, add food, wait 50 hours, harvest eggs, incubate 480 minutes	Whole organism	Embryo	hermaphrodite	RNA-seq	Illumina	paired	32	http://submit.modencode.org/submit/public/get_file/3997/extracted/N2_EE_50-480.sam.gz
C. elegans	EE_50-510	embryo 510 mins	SRS266278	N2 embryonic time point data, polyA+ RNAseq - make eggs, hatch in absence of food to L1 arrest, add food, wait 50 hours, harvest eggs, incubate 510 minutes	Whole organism	Embryo	hermaphrodite	RNA-seq	Illumina	paired	29	http://submit.modencode.org/submit/public/get_file/6446/extracted/N2_EE_50-510.1112.sam.gz.bam.sorted.bam
C. elegans	EE_50-540	embryo 540 mins	SRS266272	N2 embryonic time point data, polyA+ RNAseq - make eggs, hatch in absence of food to L1 arrest, add food, wait 50 hours, harvest eggs, incubate 540 minutes	Whole organism	Embryo	hermaphrodite	RNA-seq	Illumina	paired	33	http://submit.modencode.org/submit/public/get_file/3999/extracted/N2_EE_50-540.sam.gz
C. elegans	EE_50-570	embryo 570 mins	SRS266261	N2 embryonic time point data, polyA+ RNAseq - make eggs, hatch in absence of food to L1 arrest, add food, wait 50 hours, harvest eggs, incubate 570 minutes	Whole organism	Embryo	hermaphrodite	RNA-seq	Illumina	paired	30	http://submit.modencode.org/submit/public/get_file/4000/extracted/N2_EE_50-570.sam.gz
C. elegans	EE_50-600	embryo 600 mins	SRS266262	N2 embryonic time point data, polyA+ RNAseq - make eggs, hatch in absence of food to L1 arrest, add food, wait 50 hours, harvest eggs, incubate 600 minutes	Whole organism	Embryo	hermaphrodite	RNA-seq	Illumina	paired	27	http://submit.modencode.org/submit/public/get_file/4001/extracted/N2_EE_50-600.sam.gz
C. elegans	EE_50-630	embryo 630 mins	SRS266263	N2 embryonic time point data, polyA+ RNAseq - make eggs, hatch in absence of food to L1 arrest, add food, wait 50 hours, harvest eggs, incubate 630 minutes	Whole organism	Embryo	hermaphrodite	RNA-seq	Illumina	paired	31	http://submit.modencode.org/submit/public/get_file/4002/extracted/N2_EE_50-630.sam.gz
C. elegans	EE_50-660	embryo 660 mins	SRS266264	N2 embryonic time point data, polyA+ RNAseq - make eggs, hatch in absence of food to L1 arrest, add food, wait 50 hours, harvest eggs, incubate 660 minutes	Whole organism	Embryo	hermaphrodite	RNA-seq	Illumina	paired	28	http://submit.modencode.org/submit/public/get_file/4003/extracted/N2_EE_50-660.sam.gz
C. elegans	EE_50-690	embryo 690 mins	SRS266273	N2 embryonic time point data, polyA+ RNAseq - make eggs, hatch in absence of food to L1 arrest, add food, wait 50 hours, harvest eggs, incubate 690 minutes	Whole organism	Embryo	hermaphrodite	RNA-seq	Illumina	paired	22	http://submit.modencode.org/submit/public/get_file/4004/extracted/N2_EE_50-690.sam.gz
C. elegans	EE_50-720	embryo 720 mins	SRS266279	N2 embryonic time point data, polyA+ RNAseq - make eggs, hatch in absence of food to L1 arrest, add food, wait 50 hours, harvest eggs, incubate 720 minutes	Whole organism	Embryo	hermaphrodite	RNA-seq	Illumina	paired	27	http://submit.modencode.org/submit/public/get_file/4005/extracted/N2_EE_50-720.sam.gz
C. elegans	L1	larva L1	SRS003005,SRS151153	combined set containing N2 L1 larva polyA+ biological replicates	Whole organism	L1	hermaphrodite	RNA-seq	Illumina	single/paired	152	http://submit.modencode.org/submit/public/get_file/3882/extracted/L1.alignments.sam.gz; http://submit.modencode.org/submit/public/get_file/3882/extracted/3527.merged.sam.gz
C. elegans	LIN35	larva L1 lin35	SRS002999	lin-35(n745) mid-L1 larva polyA+	Whole organism	L1	hermaphrodite	RNA-seq	Illumina	single	29	http://submit.modencode.org/submit/public/get_file/4166/extracted/LIN35.sam.gz
C. elegans	L2	larva L2	SRS001788,SRS174229	combined set containing N2 L2 larva polyA+ biological replicates	Whole organism	L2	hermaphrodite	RNA-seq	Illumina	single	44	http://submit.modencode.org/submit/public/get_file/3881/extracted/3528.merged.sam.gz; http://submit.modencode.org/submit/public/get_file/3881/extracted/L2.sam.gz
C. elegans	L3	larva L3	SRS001790,SRS150938	combined set containing N2 L3 larva polyA+ biological replicates	Whole organism	L3	hermaphrodite	RNA-seq	Illumina	single	76	http://submit.modencode.org/submit/public/get_file/3880/extracted/L3.sam.gz; http://submit.modencode.org/submit/public/get_file/3880/extracted/3529.merged.sam.gz
C. elegans	L4	larva L4	SRS001791,SRS004864	combined set containing N2 L4 larva polyA+ replicates	Whole organism	L4	hermaphrodite	RNA-seq	Illumina	single	40	http://submit.modencode.org/submit/public/get_file/3879/extracted/L4.sam.gz; http://submit.modencode.org/submit/public/get_file/4045/extracted/L4b.sam.gz
C. elegans	L4MALE	larva L4 male	SRS003000,SRS174140	combined set containing N2 L4 larva males polyA+ biological replicates	Whole organism	L4	hermaphrodite	RNA-seq	Illumina	single	61	http://submit.modencode.org/submit/public/get_file/3909/extracted/L4MALE.sam.gz
C. elegans	YA	young adult	SRS001789,SRS178501	combined set containing N2 young adult (pre-gravid) polyA+ biological replicates	Whole organism	Young adult	hermaphrodite	RNA-seq	Illumina	single	43	http://submit.modencode.org/submit/public/get_file/4131/extracted/YA.sam.gz; http://submit.modencode.org/submit/public/get_file/4131/extracted/N2_Yad-1.sam.gz
C. elegans	AdultSPE9	adult spe9	SRS004857	Adult spe-9 polyA+	Whole organism	Adult	hermaphrodite	RNA-seq	Illumina	single	65	http://submit.modencode.org/submit/public/get_file/3901/extracted/AdultSPE9.sam.gz
C. elegans	DauerEntryDAF2	DauerEntryDAF2	SRS004860,SRS269109,SRS174141,SRS269110	combined set containing dauer entry daf-2(e1370) polyA+ biological replicates	Whole organism	Dauer entry	hermaphrodite	RNA-seq	Illumina	single/paired	105	http://submit.modencode.org/submit/public/get_file/4141/extracted/DauerEntryDAF2.sam.gz; http://submit.modencode.org/submit/public/get_file/4142/extracted/DauerEntryDAF2-1-1.sam.gz; http://submit.modencode.org/submit/public/get_file/4143/extracted/DauerEntryDAF2-2.sam.gz; http://submit.modencode.org/submit/public/get_file/4144/extracted/DauerEntryDAF2-4-1.sam.gz; http://submit.modencode.org/submi…
C. elegans	DauerDAF2	DauerDAF2	SRS004859,SRS269390,SRS269389,SRS269391	combined set containing dauer daf-2(el370) polyA+ biological replicates	Whole organism	Dauer	hermaphrodite	RNA-seq	Illumina	single/paired	158	http://submit.modencode.org/submit/public/get_file/4137/extracted/DauerDAF2.sam.gz; http://submit.modencode.org/submit/public/get_file/4139/extracted/DauerDAF2-2-1.sam.gz; http://submit.modencode.org/submit/public/get_file/4140/extracted/DauerDAF2-5-1.sam.gz
C. elegans	DauerExitDAF2	DauerExitDAF2	SRS004861,SRS151144,SRS269108,SRS269111	combined set containing dauer exit daf-2(e1370) polyA+ biological replicates	Whole organism	Dauer exit	hermaphrodite	RNA-seq	Illumina	single/paired	67	http://submit.modencode.org/submit/public/get_file/4145/extracted/DauerExitDAF2.sam.gz; http://submit.modencode.org/submit/public/get_file/4147/extracted/DauerExitDAF2-3-1.sam.gz; http://submit.modencode.org/submit/public/get_file/4148/extracted/DauerExitDAF2-6-1.sam.gz

## Sheet: worm tissues and cells
Species	Sample Name	Annotated Name	SRA accesssion	Sample Description	Tissue or Cells	Organ/Tissue	Age	Sex	Sample Type	Sequencing platform	Single- vs paired-end	Reads sequenced (M)	URL for mapped reads
C. elegans	DSN-Negative-Positive	4 cell stage embryo tissue DSN	SRS242383,SRS242384	N2 hand-picked 4 cell embryos DSN-Negative and DSN-Positive, total RNA	tissue	4 cell stage	EE	hermaphrodite	RNA-seq	Illumina	single	12	https://aspera.gs.washington.edu/aspera/user/modENCODE/C_elegans/20120601FreezeAlignments
C. elegans	N2_4cell_EE_RZ-56	4 cell stage embryo tissue RZ-56	SRS311761	N2 hand-picked 4 cell embryos, ribo-zero treated total RNA library	tissue	4 cell stage	EE	hermaphrodite	RNA-seq	Illumina	paired	15	Please email LaDeana Hillier <lhillier@watson.wustl.edu> for data request
C. elegans	PharyngealMuscle	PharyngealMuscle tissue	SRS242498	N2 pharyngeal muscle. Pharyngeal muscle, late embryo, total RNA	tissue	pharyngeal muscle	LE	hermaphrodite	RNA-seq	Illumina	paired	20
C. elegans	N2_Ad_gonad-1-RZLI	Adult gonad tissue RZLI	SRS344182	N2 adult gonad Ad_gonad-1 ribozero low input treated, total RNA, RNAseq random fragment library	tissue	gonad	Adult	hermaphrodite	RNA-seq	Illumina	single/paired	15
C. elegans	DMM239_Z1Z4_Em	Embryonic Z1/Z4 cells DMM239	SRS344160	DZ685 embryonic Z1/Z4 cells library FGSR239, total RNA, DSN treated, RNAseq random fragment library	cells	Z1/Z4 cells	Embryo	hermaphrodite	RNA-seq	Illumina	single/paired	11
C. elegans	DMM260_N2ref_EE	Early embryo cells DMM260	SRS344159	N2 early embryo reference cells library FGSR260, total RNA, DSN treated, RNAseq random fragment library	cells	Whole organism	EE	hermaphrodite	RNA-seq	Illumina	single/paired	10
C. elegans	DMM401_N2all_L1-DSN	All larval cells DMM401_L1-DSN	SRS311684	Illumina sequencing of C. elegans N2 larval L1 all cell library FGSR401 total RNA RNAseq random fragment library	cells	Whole organism	L1	hermaphrodite	RNA-seq	Illumina	paired	22
C. elegans	DMM401-N2all_L1-V	All larval cells DMM401_ L1-V	SRS311747	N2 larval L1 all cell library FGSR401, total RNA, RNAseq random fragment library	cells	Whole organism	L1	hermaphrodite	RNA-seq	Illumina	paired	209
C. elegans	DMM402_N2all_L1-DSN	All larval cells DMM402_L1-DSN	SRS311687	Illumina sequencing of C. elegans N2 larval L1 all cell library FGSR402 total RNA RNAseq random fragment library	cells	Whole organism	L1	hermaphrodite	RNA-seq	Illumina	paired	35
C. elegans	DMM402-N2all_L1-V	All larval cells DMM402_L1-V	SRS311750	N2 larval L1 all cell library FGSR402, total RNA, RNAseq random fragment library	cells	Whole organism	L1	hermaphrodite	RNA-seq	Illumina	paired	367
C. elegans	DMM383-all-nrn_L1-V	All neurons DMM383_L1	SRS311746	NW1229 larval L1 all neurons library FGSR383, total RNA, RNAseq random fragment library	cells	all neurons	L1	hermaphrodite	RNA-seq	Illumina	paired	90
C. elegans	DMM391-all-nrn_L1-V	All neurons DMM391_L1	SRS311749	NW1229 larval L1 all neurons library FGSR391, total RNA, RNAseq random fragment library	cells	all neurons	L1	hermaphrodite	RNA-seq	Illumina	paired	30
C. elegans	DMM386-NSML_NSMR-nrn_L1	NSML_NSMR neurons DMM386-L1	SRS308486	LX837 larval L1 NSML and NSMR neurons, total RNA, DSN treated	cells	NSML, NSMR neurons	L1	hermaphrodite	RNA-seq	Illumina	paired	9
C. elegans	DMM387-NSML_NSMR-nrn_L1-V	NSML_NSMR neurons DMM387-L1	SRS311748	LX837 larval L1 NSML and NSMR neurons library FGSR387, total RNA, RNAseq random fragment library	cells	NSML, NSMR neurons	L1	hermaphrodite	RNA-seq	Illumina	paired	14
C. elegans	DMM389_NSM_L1	NSM neurons DMM389_L1	SRS344181	LX837 larval L1 NSM neuron library FGSR389, total RNA, DSN treated, RNAseq random fragment library	cells	NSM neuron	L1	hermaphrodite	RNA-seq	Illumina	paired	15
C. elegans	DMM408_Amot_nrn_L2-DSN	Motor neurons DMM408_L2	SRS311688	Illumina sequencing of C. elegans larval L2 A motor neuron library FGSR408 DSN treated RNAseq random fragment library	cells	A motor neuron	L2	hermaphrodite	RNA-seq	Illumina	paired	14
C. elegans	DMM414_Amot_nrn_L2-DSN	Motor neurons DMM414_L2	SRS311689	Illumina sequencing of C. elegans larval L2 A motor neuron library FGSR414 DSN treated RNAseq random fragment library	cells	A motor neuron	L2	hermaphrodite	RNA-seq	Illumina	paired	14
C. elegans	DMM415_Amot_nrn_L2-DSN	Motor neuron DMM415_L2	SRS311690	Illumina sequencing of C. elegans larval L2 A motor neuron library FGSR415 DSN treated RNAseq random fragment library	cells	A motor neuron	L2	hermaphrodite	RNA-seq	Illumina	paired	16
