# Supplementary material for: Comparison of D. melanogaster and C. elegans developmental stages, tissues, and cells by modENCODE RNA-seq data
Source: HighWire-hosted journal article supplement (doi:10.1101/gr.170100.113), 2014-07-01
Supplement: Supplemental_Files.zip [file TableS3 all associated genes.xlsx]

## Sheet: fly stage-associated genes
Embryo0-2h		Embryo2-4h		Embryo4-6h		Embryo6-8h		Embryo8-10h		Embryo10-12h		Embryo12-14h		Embryo14-16h		Embryo16-18h		Embryo18-20h		Embryo20-22h		Embryo22-24h		L1		L2		L3+12h		L3PS1-2		L3PS3-6		L3PS7-9		Prepupae		Prepupae+12h		Prepupae+24h		Prepupae+2d		Prepupae+3d		Prepupae+4d		Male+1d
ID	Name	ID	Name	ID	Name	ID	Name	ID	Name	ID	Name	ID	Name	ID	Name	ID	Name	ID	Name	ID	Name	ID	Name	ID	Name	ID	Name	ID	Name	ID	Name	ID	Name	ID	Name	ID	Name	ID	Name	ID	Name	ID	Name	ID	Name	ID	Name	ID	Name
FBgn0031217	CG11377	FBgn0002121	l(2)gl	FBgn0002121	l(2)gl	FBgn0031229	CG3436	FBgn0031216	CG11376	FBgn0031224	CG11454	FBgn0002121	l(2)gl	FBgn0031239	CG17075	FBgn0002121	l(2)gl	FBgn0031219	CG13694	FBgn0005278	Sam-S	FBgn0005278	Sam-S	FBgn0005278	Sam-S	FBgn0051975	CG31975	FBgn0031219	CG13694	FBgn0031248	CG11912	FBgn0001142	Gs1	FBgn0031209	Ir21a	FBgn0031220	CG4822	FBgn0051973	Cda5	FBgn0031214	CG11374	FBgn0031208	CG11023	FBgn0031209	Ir21a	FBgn0031228	CG11455	FBgn0031208	CG11023
FBgn0026787	Nhe1	FBgn0002931	net	FBgn0002931	net	FBgn0031224	CG11454	FBgn0031224	CG11454	FBgn0031231	mRpL10	FBgn0067779	dbr	FBgn0000061	al	FBgn0031219	CG13694	FBgn0025686	CG11592	FBgn0053127	CG33127	FBgn0025683	CG3164	FBgn0051975	CG31975	FBgn0051974	CG31974	FBgn0051974	CG31974	FBgn0031249	CG11911	FBgn0031248	CG11912	FBgn0031213	galectin	FBgn0001142	Gs1	FBgn0025683	CG3164	FBgn0004583	ex	FBgn0067779	dbr	FBgn0051973	Cda5	FBgn0031261	nAcRbeta-21C	FBgn0031214	CG11374
FBgn0031227	CG3709	FBgn0031233	CG11490	FBgn0031216	CG11376	FBgn0016977	spen	FBgn0016977	spen	FBgn0022246	Rpp30	FBgn0031216	CG11376	FBgn0031255	BBS8	FBgn0259818	CG42399	FBgn0043364	cbt	FBgn0028481	CG4341	FBgn0004611	Plc21C	FBgn0051974	CG31974	FBgn0031231	mRpL10	FBgn0086031	snoRNA:Me28S-U1230	FBgn0031263	CG2789	FBgn0263081	CG43349	FBgn0031220	CG4822	FBgn0051976	CG31976	FBgn0015924	crq	FBgn0260933	rempA	FBgn0031214	CG11374	FBgn0031228	CG11455	FBgn0000442	Pkg21D	FBgn0031228	CG11455
FBgn0053635	CG33635	FBgn0086902	kis	FBgn0031229	CG3436	FBgn0086902	kis	FBgn0022246	Rpp30	FBgn0031245	CG3625	FBgn0031227	CG3709	FBgn0031257	CG4133	FBgn0031232	CG11617	FBgn0000442	Pkg21D	FBgn0031294	IA-2	FBgn0053127	CG33127	FBgn0053127	CG33127	FBgn0031307	MFS3	FBgn0002563	Lsp1beta	FBgn0259229	CG42329	FBgn0053128	CG33128	FBgn0001142	Gs1	FBgn0025686	CG11592	FBgn0005660	Ets21C	FBgn0013323	Ptth	FBgn0031235	CG13693	FBgn0031232	CG11617	FBgn0020304	drongo	FBgn0031235	CG13693
FBgn0031231	mRpL10	FBgn0086912	mbm	FBgn0031224	CG11454	FBgn0022246	Rpp30	FBgn0031245	CG3625	FBgn0000061	al	FBgn0016977	spen	FBgn0031260	Spp	FBgn0031239	CG17075	FBgn0086031	snoRNA:Me28S-U1230	FBgn0031306	CG4577	FBgn0031276	CG12506	FBgn0003278	RpI135	FBgn0031308	CG4749	FBgn0000579	Eno	FBgn0053128	CG33128	FBgn0040718	CG15353	FBgn0031248	CG11912	FBgn0031248	CG11912	FBgn0013323	Ptth	FBgn0000497	ds	FBgn0031239	CG17075	FBgn0031235	CG13693	FBgn0262177	mir-375	FBgn0031240	CG3345
FBgn0031233	CG11490	FBgn0086856	CG11555	FBgn0259818	CG42399	FBgn0031238	CG3645	FBgn0003278	RpI135	FBgn0031255	BBS8	FBgn0086856	CG11555	FBgn0005660	Ets21C	FBgn0025686	CG11592	FBgn0028481	CG4341	FBgn0031322	CG5001	FBgn0031277	CG13947	FBgn0002593	RpLP1	FBgn0031357	mRpL48	FBgn0001125	Got2	FBgn0040718	CG15353	FBgn0031389	CG4259	FBgn0031250	Ent1	FBgn0031250	Ent1	FBgn0020304	drongo	FBgn0031283	CG15880	FBgn0031254	CG13692	FBgn0031264	CG11835	FBgn0031289	CG13950	FBgn0031247	CG11562
FBgn0031238	CG3645	FBgn0003444	smo	FBgn0086902	kis	FBgn0086912	mbm	FBgn0004583	ex	FBgn0031256	CG4164	FBgn0031245	CG3625	FBgn0029095	aru	FBgn0031254	CG13692	FBgn0031322	CG5001	FBgn0263080	CG43348	FBgn0031306	CG4577	FBgn0021874	Nle	FBgn0000579	Eno	FBgn0040718	CG15353	FBgn0040717	Nplp4	FBgn0031471	CG3117	FBgn0031253	CG11885	FBgn0031251	CG4213	FBgn0031313	CG5080	FBgn0053526	PNUTS	FBgn0031264	CG11835	FBgn0002936	ninaA	FBgn0031299	CG4629	FBgn0051920
FBgn0086856	CG11555	FBgn0017457	U2af38	FBgn0031238	CG3645	FBgn0086855	CG17078	FBgn0031256	CG4164	FBgn0262510	CR43080	FBgn0031250	Ent1	FBgn0046113	GluRIIC	FBgn0031258	CG4297	FBgn0031324	CG14342	FBgn0263081	CG43349	FBgn0031322	CG5001	FBgn0031275	GABA-B-R3	FBgn0051664	CG31664	FBgn0040717	Nplp4	FBgn0259230	lectin-22C	FBgn0051698	CG31698	FBgn0031267	Ipk2	FBgn0015924	crq	FBgn0031324	CG14342	FBgn0003916	snRNA:U1:21D	FBgn0013323	Ptth	FBgn0259229	CG42329	FBgn0016926	Pino	FBgn0045202
FBgn0086855	CG17078	FBgn0023444		FBgn0086855	CG17078	FBgn0017457	U2af38	FBgn0262510	CR43080	FBgn0031257	CG4133	FBgn0000061	al	FBgn0041097	robo3	FBgn0046113	GluRIIC	FBgn0041097	robo3	FBgn0040723	CG5011	FBgn0263080	CG43348	FBgn0031277	CG13947	FBgn0259230	lectin-22C	FBgn0259230	lectin-22C	FBgn0031389	CG4259	FBgn0031512	CG15404	FBgn0002563	Lsp1beta	FBgn0031298	Atg4	FBgn0031327	CG5397	FBgn0031313	CG5080	FBgn0031283	CG15880	FBgn0031373	CG15358	FBgn0031322	CG5001	FBgn0051921	CG31921
FBgn0024352	Hop	FBgn0031252	CG13690	FBgn0003444	smo	FBgn0003278	RpI135	FBgn0003963	ush	FBgn0031260	Spp	FBgn0003278	RpI135	FBgn0261509	haf	FBgn0028481	CG4341	FBgn0086758	chinmo	FBgn0051664	CG31664	FBgn0040723	CG5011	FBgn0031282	Pex12	FBgn0051668	CG31668	FBgn0031389	CG4259	FBgn0031412	CG16995	FBgn0031515	CG9664	FBgn0003916	snRNA:U1:21D	FBgn0016926	Pino	FBgn0053126	NLaz	FBgn0024314	Plap	FBgn0020304	drongo	FBgn0053543	CG33543	FBgn0031327	CG5397	FBgn0031261	nAcRbeta-21C
FBgn0020622	Pi3K21B	FBgn0031256	CG4164	FBgn0017457	U2af38	FBgn0031256	CG4164	FBgn0031260	Spp	FBgn0260933	rempA	FBgn0031255	BBS8	FBgn0031374	CG7337	FBgn0031324	CG14342	FBgn0051665	wry	FBgn0051665	wry	FBgn0051664	CG31664	FBgn0020545	kraken	FBgn0053124	CG33124	FBgn0051668	CG31668	FBgn0031471	CG3117	FBgn0259950	CG42460	FBgn0031298	Atg4	FBgn0024314	Plap	FBgn0051935	CG31935	FBgn0051922	CG31922	FBgn0053526	PNUTS	FBgn0085201	CG34172	FBgn0021906	RFeSP	FBgn0023489	Pph13
FBgn0004611	Plc21C	FBgn0262510	CR43080	FBgn0031252	CG13690	FBgn0027592	MED15	FBgn0021874	Nle	FBgn0021874	Nle	FBgn0004583	ex	FBgn0259192	CG42296	FBgn0041097	robo3	FBgn0031374	CG7337	FBgn0051668	CG31668	FBgn0051665	wry	FBgn0031294	IA-2	FBgn0259717	CG42371	FBgn0031418	CG3609	FBgn0031533	CG2772	FBgn0261560	Thor	FBgn0031317	CG5118	FBgn0031317	CG5118	FBgn0031362		FBgn0031319	CG4896	FBgn0031302	CG14340	FBgn0031414	eys	FBgn0031373	CG15358	FBgn0040106	lectin-21Cb
FBgn0015567		FBgn0027592	MED15	FBgn0027592	MED15	FBgn0003963	ush	FBgn0010323	Gsc	FBgn0031268	cold	FBgn0031257	CG4133	FBgn0262126	gho	FBgn0086758	chinmo	FBgn0051668	CG31668	FBgn0053124	CG33124	FBgn0031374	CG7337	FBgn0031306	CG4577	FBgn0262126	gho	FBgn0019830	colt	FBgn0031547	Sr-CIV	FBgn0031547	Sr-CIV	FBgn0262148	CR42874	FBgn0053126	NLaz	FBgn0031381	Npc2a	FBgn0051935	CG31935	FBgn0261458	capt	FBgn0031426	CG18641	FBgn0004507	GlyP	FBgn0040107	lectin-21Ca
FBgn0023444		FBgn0010602	lwr	FBgn0003963	ush	FBgn0010602	lwr	FBgn0031270	CG13689	FBgn0031270	CG13689	FBgn0031258	CG4297	FBgn0051690	CG31690	FBgn0010704	l(2)s5379	FBgn0053124	CG33124	FBgn0031418	CG3609	FBgn0053124	CG33124	FBgn0031307	MFS3	FBgn0031418	CG3609	FBgn0027571	CG3523	FBgn0031558	CG16704	FBgn0031558	CG16704	FBgn0040718	CG15353	FBgn0051935	CG31935	FBgn0262148	CR42874	FBgn0051933	CG31933	FBgn0031331	CG5440	FBgn0026395	Or23a	FBgn0085201	CG34172	FBgn0031273	CG2839
FBgn0031252	CG13690	FBgn0031266	CG2807	FBgn0010602	lwr	FBgn0021874	Nle	FBgn0000497	ds	FBgn0031286	CG3862	FBgn0031260	Spp	FBgn0031474	CG2991	FBgn0031424	VGlut	FBgn0031424	VGlut	FBgn0031424	VGlut	FBgn0031418	CG3609	FBgn0031308	CG4749	FBgn0019830	colt	FBgn0053281	CG33281	FBgn0263096	CR43364	FBgn0263096	CR43364	FBgn0010288	Uch	FBgn0031381	Npc2a	FBgn0031412	CG16995	FBgn0262275	mir-2280	FBgn0031372	CG7295	FBgn0004242	Syt1	FBgn0031405	CG4267	FBgn0011244	Hsp60B
FBgn0015924	crq	FBgn0051658	Nnf1b	FBgn0021874	Nle	FBgn0031266	CG2807	FBgn0031287	CG4291	FBgn0031287	CG4291	FBgn0260933	rempA	FBgn0031488	CG17265	FBgn0031426	CG18641	FBgn0085477	CG34448	FBgn0031461	daw	FBgn0031424	VGlut	FBgn0031321	Tgt	FBgn0031467	Cpr23B	FBgn0031522	CG3285	FBgn0262721	CG43165	FBgn0262721	CG43165	FBgn0031405	CG4267	FBgn0262148	CR42874	FBgn0014010	Rab5	FBgn0053673	CG33673	FBgn0053673	CG33673	FBgn0031473	CG3104	FBgn0031417	CG3597	FBgn0026438	Eaat2
FBgn0031267	Ipk2	FBgn0086130	KH1	FBgn0031266	CG2807	FBgn0010323	Gsc	FBgn0020305	dbe	FBgn0029095	aru	FBgn0031268	cold	FBgn0031530	pgant2	FBgn0051690	CG31690	FBgn0031449	CG31689	FBgn0031473	CG3104	FBgn0004242	Syt1	FBgn0263080	CG43348	FBgn0031479	Prx6005	FBgn0031538	CG3246	FBgn0051778	CG31778	FBgn0051778	CG31778	FBgn0031412	CG16995	FBgn0031395	CG10874	FBgn0031432	Cyp309a1	FBgn0031375	erm	FBgn0053543	CG33543	FBgn0010263	Rbp9	FBgn0085477	CG34448	FBgn0031276	CG12506
FBgn0051658	Nnf1b	FBgn0031281	Saf6	FBgn0010323	Gsc	FBgn0000497	ds	FBgn0003310	S	FBgn0020305	dbe	FBgn0031270	CG13689	FBgn0051777	CG31777	FBgn0031466	CG3119	FBgn0031461	daw	FBgn0027571	CG3523	FBgn0031461	daw	FBgn0053128	CG33128	FBgn0031497	CG17259	FBgn0031542	CG15414	FBgn0031580	CG15423	FBgn0031580	CG15423	FBgn0014010	Rab5	FBgn0010288	Uch	FBgn0031457	CG3077	FBgn0041337	Cyp309a2	FBgn0261523	CG42658	FBgn0031504	CG15403	FBgn0031436	CG3214	FBgn0031279	CG3544
FBgn0086130	KH1	FBgn0031284	CG3876	FBgn0031270	CG13689	FBgn0031281	Saf6	FBgn0031317	CG5118	FBgn0031313	CG5080	FBgn0010583	dock	FBgn0010473	tutl	FBgn0031467	Cpr23B	FBgn0031466	CG3119	FBgn0031514	CG3332	FBgn0027571	CG3523	FBgn0031357	mRpL48	FBgn0053281	CG33281	FBgn0051954	CG31954	FBgn0020376	Sr-CIII	FBgn0031581		FBgn0031450	Hrs	FBgn0031405	CG4267	FBgn0031468	CG2975	FBgn0031440	CG15395	FBgn0051949	CG31949	FBgn0031505	CG12400	FBgn0031449	CG31689	FBgn0031288	CG13949
FBgn0031281	Saf6	FBgn0015621	Clp	FBgn0031281	Saf6	FBgn0031287	CG4291	FBgn0031318	CG4887	FBgn0051922	CG31922	FBgn0029095	aru	FBgn0053003	CG33003	FBgn0031468	CG2975	FBgn0031467	Cpr23B	FBgn0031518	CG3277	FBgn0085422	CG34393	FBgn0260648	Rrp40	FBgn0031522	CG3285	FBgn0031560	CG16713	FBgn0003372	Sgs1	FBgn0031589	CG3714	FBgn0031471	CG3117	FBgn0031412	CG16995	FBgn0031469	CG18558	FBgn0031442	Prosbeta4R1	FBgn0031442	Prosbeta4R1	FBgn0031526	CG8838	FBgn0031478	CG8814	FBgn0031292	CG15824
FBgn0031284	CG3876	FBgn0010583	dock	FBgn0015621	Clp	FBgn0086031	snoRNA:Me28S-U1230	FBgn0002543	lea	FBgn0003926	snRNA:U3:22A	FBgn0031313	CG5080	FBgn0031630	CG15629	FBgn0031474	CG2991	FBgn0031468	CG2975	FBgn0031520	CG8837	FBgn0031514	CG3332	FBgn0051664	CG31664	FBgn0031538	CG3246	FBgn0031561	CG16712	FBgn0031653	Jon25Biii	FBgn0003372	Sgs1	FBgn0051694	CG31694	FBgn0014010	Rab5	FBgn0031470	CG18557	FBgn0031457	CG3077	FBgn0031463	CG15400	FBgn0031542	CG15414	FBgn0031505	CG12400	FBgn0031295	CG4375
FBgn0015621	Clp	FBgn0003916	snRNA:U1:21D	FBgn0010583	dock	FBgn0020305	dbe	FBgn0086698	frtz	FBgn0261509	haf	FBgn0051922	CG31922	FBgn0031639	mRpS2	FBgn0051694	CG31694	FBgn0085422	CG34393	FBgn0031548	CG8852	FBgn0031518	CG3277	FBgn0051665	wry	FBgn0051954	CG31954	FBgn0031564	CG2816	FBgn0031654	Jon25Bii	FBgn0031653	Jon25Biii	FBgn0051698	CG31698	FBgn0031432	Cyp309a1	FBgn0031489	CG17224	FBgn0031463	CG15400	FBgn0031465	CG3123	FBgn0031559	CG3513	FBgn0031515	CG9664	FBgn0031301	CG14339
FBgn0031286	CG3862	FBgn0031308	CG4749	FBgn0020304	drongo	FBgn0003310	S	FBgn0031361	CG17652	FBgn0031361	CG17652	FBgn0261509	haf	FBgn0260451	CG14042	FBgn0024947	NTPase	FBgn0031518	CG3277	FBgn0000721	for	FBgn0031520	CG8837	FBgn0051663	CG31663	FBgn0031544	CG17593	FBgn0020376	Sr-CIII	FBgn0020906	Jon25Bi	FBgn0031678	CG31918	FBgn0031512	CG15404	FBgn0031450	Hrs	FBgn0031491	alpha4GT1	FBgn0031465	CG3123	FBgn0031488	CG17265	FBgn0051772		FBgn0021967	Pdsw	FBgn0031302	CG14340
FBgn0031287	CG4291	FBgn0031309	Tfb4	FBgn0031287	CG4291	FBgn0031318	CG4887	FBgn0000097	aop	FBgn0027597	CG17712	FBgn0259717	CG42371	FBgn0031702	fusl	FBgn0031530	pgant2	FBgn0031530	pgant2	FBgn0031560	CG16713	FBgn0031548	CG8852	FBgn0001125	Got2	FBgn0053003	CG33003	FBgn0053196	dp	FBgn0031678	CG31918	FBgn0083028	snoRNA:Psi18S-525k	FBgn0031515	CG9664	FBgn0031491	alpha4GT1	FBgn0031516	CG9663	FBgn0031469	CG18558	FBgn0031489	CG17224	FBgn0051774	fred	FBgn0051954	CG31954	FBgn0031305	Iris
FBgn0003310	S	FBgn0031310	CG4764	FBgn0020305	dbe	FBgn0002543	lea	FBgn0031403	CG15387	FBgn0031376	Der-1	FBgn0010704	l(2)s5379	FBgn0016660	H15	FBgn0015663	Dot	FBgn0051956	pgant4	FBgn0031561	CG16712	FBgn0031560	CG16713	FBgn0040717	Nplp4	FBgn0031619	CG3355	FBgn0031629	Clect27	FBgn0031693	Cyp4ac1	FBgn0031695	Cyp4ac3	FBgn0053282	CG33282	FBgn0053282	CG33282	FBgn0261560	Thor	FBgn0031470	CG18557	FBgn0031490	CG17264	FBgn0031585	CG2955	FBgn0031560	CG16713	FBgn0031323	CG5139
FBgn0015905	ast	FBgn0261458	capt	FBgn0003310	S	FBgn0031356	CG17660	FBgn0000490	dpp	FBgn0010704	l(2)s5379	FBgn0262126	gho	FBgn0051915	CG31915	FBgn0051777	CG31777	FBgn0031563	CG10031	FBgn0031563	CG10031	FBgn0031561	CG16712	FBgn0051668	CG31668	FBgn0031639	mRpS2	FBgn0031653	Jon25Biii	FBgn0031695	Cyp4ac3	FBgn0000052	ade2	FBgn0020445	E23	FBgn0020445	E23	FBgn0031558	CG16704	FBgn0031496	CG17258	FBgn0031496	CG17258	FBgn0260428	CG42523	FBgn0031564	CG2816	FBgn0011294	a5
FBgn0261938	mtRNApol	FBgn0031314	CG4785	FBgn0031309	Tfb4	FBgn0086698	frtz	FBgn0031453	CG9894	FBgn0031403	CG15387	FBgn0051690	CG31690	FBgn0031730	CG7236	FBgn0051959		FBgn0051777	CG31777	FBgn0003386	Shaw	FBgn0031563	CG10031	FBgn0053124	CG33124	FBgn0031651	mRpL24	FBgn0031654	Jon25Bii	FBgn0041719	snRNA:U4:25F	FBgn0262317	mir-966	FBgn0259950	CG42460	FBgn0259950	CG42460	FBgn0031562	CG3604	FBgn0031513	CG3347	FBgn0015600	toc	FBgn0031634	Ir25a	FBgn0031574	CG3964	FBgn0026141	Cdlc2
FBgn0031308	CG4749	FBgn0031315	CG14341	FBgn0031318	CG4887	FBgn0260648	Rrp40	FBgn0031454	CG9960	FBgn0015816	Slh	FBgn0031474	CG2991	FBgn0015381	dsf	FBgn0010473	tutl	FBgn0003386	Shaw	FBgn0051959		FBgn0003386	Shaw	FBgn0031418	CG3609	FBgn0031654	Jon25Bii	FBgn0020906	Jon25Bi	FBgn0031732	CG11149	FBgn0031791	CG9486	FBgn0031534	Snx1	FBgn0031534	Snx1	FBgn0051955	CG31955	FBgn0051776	CG31776	FBgn0031504	CG15403	FBgn0031646	CG2837	FBgn0028482	CG16857	FBgn0031332	CG5556
FBgn0031309	Tfb4	FBgn0031318	CG4887	FBgn0002543	lea	FBgn0031375	erm	FBgn0026324	Taf10b	FBgn0031454	CG9960	FBgn0031494	CG17219	FBgn0031762	CG9098	FBgn0031627	CG15630	FBgn0051959		FBgn0085205	CG34176	FBgn0051774	fred	FBgn0031424	VGlut	FBgn0020906	Jon25Bi	FBgn0262467	Scox	FBgn0031805	CG9505	FBgn0259716	CG42370	FBgn0261560	Thor	FBgn0031535	CG12795	FBgn0014033	Sr-CI	FBgn0085369	CG34340	FBgn0031513	CG3347	FBgn0031651	mRpL24	FBgn0031602	CG15431	FBgn0031333	CG5561
FBgn0031310	CG4764	FBgn0001174	halo	FBgn0031344	CG7420	FBgn0028952	Kebab	FBgn0004584	Rrp1	FBgn0026324	Taf10b	FBgn0243513	cnir	FBgn0001170	H2.0	FBgn0031629	Clect27	FBgn0031589	CG3714	FBgn0031579	CG15422	FBgn0031579	CG15422	FBgn0015521	RpS21	FBgn0262467	Scox	FBgn0031662	CG3792	FBgn0259716	CG42370	FBgn0025595	GRHR	FBgn0015663	Dot	FBgn0015663	Dot	FBgn0040102	lectin-24Db	FBgn0051955	CG31955	FBgn0031515	CG9664	FBgn0031660	mRpL28	FBgn0085380	CG34351	FBgn0051924	CG31924
FBgn0261458	capt	FBgn0011570	cpb	FBgn0026398	Or22a	FBgn0000097	aop	FBgn0031484	CG3165	FBgn0015521	RpS21	FBgn0003934	snRNA:U5:23D	FBgn0028419	Kr-h2	FBgn0031630	CG15629	FBgn0010473	tutl	FBgn0031580	CG15423	FBgn0031580	CG15423	FBgn0028970	betaggt-II	FBgn0031660	mRpL28	FBgn0065104	snmRNA:158	FBgn0031813	CG9527	FBgn0000053	ade3	FBgn0263096	CR43364	FBgn0051778	CG31778	FBgn0031717	Oscillin	FBgn0004893	bowl	FBgn0031526	CG8838	FBgn0261836	Msp-300	FBgn0031652	jet	FBgn0031335	CG5565
FBgn0031312	Tango14	FBgn0031361	CG17652	FBgn0011570	cpb	FBgn0031403	CG15387	FBgn0031516	CG9663	FBgn0051950	CG31950	FBgn0031530	pgant2	FBgn0031779	CG9175	FBgn0051660	pog	FBgn0031602	CG15431	FBgn0031602	CG15431	FBgn0031602	CG15431	FBgn0031497	CG17259	FBgn0031662	CG3792	FBgn0031689	Cyp28d1	FBgn0031821	CG9542	FBgn0031937	CG13795	FBgn0051778	CG31778	FBgn0051777	CG31777	FBgn0031735	CG11029	FBgn0051960	CG31960	FBgn0031530	pgant2	FBgn0031692	TpnC25D	FBgn0031684	CG8680	FBgn0051659	CG31659
FBgn0031314	CG4785	FBgn0028952	Kebab	FBgn0260648	Rrp40	FBgn0031421		FBgn0004892	sob	FBgn0031497	CG17259	FBgn0024244	drm	FBgn0085409	CG34380	FBgn0031646	CG2837	FBgn0053196	dp	FBgn0085380	CG34351	FBgn0019982	Gs1l	FBgn0031514	CG3332	FBgn0031688	Cyp28d2	FBgn0031693	Cyp4ac1	FBgn0025595	GRHR	FBgn0011230	poe	FBgn0031566	CG2818	FBgn0051955	CG31955	FBgn0031752	CG9044	FBgn0051958	CG31958	FBgn0031531	CG8840	FBgn0031700	CG14022	FBgn0261836	Msp-300	FBgn0031337	CG14346
FBgn0031315	CG14341	FBgn0031390	tho2	FBgn0031361	CG17652	FBgn0000490	dpp	FBgn0004893	bowl	FBgn0243513	cnir	FBgn0015663	Dot	FBgn0011722	Tig	FBgn0031650	CG14044	FBgn0031627	CG15630	FBgn0051660	pog	FBgn0085380	CG34351	FBgn0053281	CG33281	FBgn0031703	CG12512	FBgn0031703	CG12512	FBgn0031930	CG7025	FBgn0040958	Peritrophin-15b	FBgn0031581		FBgn0031566	CG2818	FBgn0031760	Tsp26A	FBgn0021800	l(2)k16918	FBgn0051776	CG31776	FBgn0262097	CG42850	FBgn0031692	TpnC25D	FBgn0031343	CG18131
FBgn0024314	Plap	FBgn0031391	CG11723	FBgn0031375	erm	FBgn0026778	Rad1	FBgn0000547	ed	FBgn0031537	sec5	FBgn0085369	CG34340	FBgn0031816	CG16947	FBgn0016075	vkg	FBgn0031629	Clect27	FBgn0031649	hoe2	FBgn0031627	CG15630	FBgn0031538	CG3246	FBgn0051648	CG31648	FBgn0031737	obst-E	FBgn0031937	CG13795	FBgn0040959	Peritrophin-15a	FBgn0040102	lectin-24Db	FBgn0040104	lectin-24A	FBgn0001089	Gal	FBgn0040102	lectin-24Db	FBgn0031554	CG15418	FBgn0031708	CG7382	FBgn0015031	cype	FBgn0031345	CG18132
FBgn0031320	CG5126	FBgn0031393	CG15382	FBgn0028952	Kebab	FBgn0031437	p16-ARC	FBgn0014033	Sr-CI	FBgn0031544	CG17593	FBgn0031571	CG3921	FBgn0031850	Tsp	FBgn0000299	Cg25C	FBgn0051660	pog	FBgn0016075	vkg	FBgn0051660	pog	FBgn0031548	CG8852	FBgn0031777	CG9154	FBgn0040950	Muc26B	FBgn0003961	Uro	FBgn0032074	Tsp29Fa	FBgn0031589	CG3714	FBgn0086032	snoRNA:Me28S-C437	FBgn0031765	CG9109	FBgn0053196	dp	FBgn0031559	CG3513	FBgn0031716	CG14015	FBgn0031700	CG14022	FBgn0031347	CG10869
FBgn0031321	Tgt	FBgn0085203	CG34174	FBgn0031390	tho2	FBgn0031453	CG9894	FBgn0001075	ft	FBgn0024244	drm	FBgn0000547	ed	FBgn0051632	sens-2	FBgn0031682	CG5828	FBgn0031646	CG2837	FBgn0000299	Cg25C	FBgn0031649	hoe2	FBgn0003386	Shaw	FBgn0040950	Muc26B	FBgn0031801	CG9498	FBgn0032024	CG14273	FBgn0000640	Fbp2	FBgn0020762	Atet	FBgn0020376	Sr-CIII	FBgn0051641	stai	FBgn0031613	HP6	FBgn0031568	CG10019	FBgn0031726	Cyp6a16Psi	FBgn0085410	TrissinR	FBgn0021906	RFeSP
FBgn0031344	CG7420	FBgn0031398	CG10880	FBgn0031391	CG11723	FBgn0026324	Taf10b	FBgn0026319	Traf4	FBgn0004892	sob	FBgn0086032	snoRNA:Me28S-C437	FBgn0031879	uif	FBgn0031702	fusl	FBgn0031650	CG14044	FBgn0031688	Cyp28d2	FBgn0031650	CG14044	FBgn0051959		FBgn0026755	Ugt37b1	FBgn0011722	Tig	FBgn0040958	Peritrophin-15b	FBgn0040064	yip2	FBgn0031645	CG3036	FBgn0040102	lectin-24Db	FBgn0259714	CG42368	FBgn0031623	Taf12L	FBgn0051774	fred	FBgn0031775	CG9150	FBgn0001128	Gpdh	FBgn0031359	CG18317
FBgn0031351	CG14352	FBgn0031399	mio	FBgn0000097	aop	FBgn0028398	Taf10	FBgn0031597	CG17612	FBgn0004893	bowl	FBgn0001075	ft	FBgn0010453	Wnt4	FBgn0016920	nompC	FBgn0016075	vkg	FBgn0031689	Cyp28d1	FBgn0031688	Cyp28d2	FBgn0085205	CG34176	FBgn0031791	CG9486	FBgn0031821	CG9542	FBgn0040959	Peritrophin-15a	FBgn0032170	CG4658	FBgn0003372	Sgs1	FBgn0020762	Atet	FBgn0031808	CG9507	FBgn0031643	CG3008	FBgn0031585	CG2955	FBgn0261699	CR42735	FBgn0029161	slmo	FBgn0000579	Eno
FBgn0031356	CG17660	FBgn0031413	CG9967	FBgn0085203	CG34174	FBgn0004584	Rrp1	FBgn0031601	Dim1	FBgn0031600	CG3652	FBgn0031600	CG3652	FBgn0261800	LanB1	FBgn0016660	H15	FBgn0000299	Cg25C	FBgn0031697	CG14024	FBgn0031689	Cyp28d1	FBgn0031579	CG15422	FBgn0031792	CG13983	FBgn0031824	CG9547	FBgn0032066	CG9463	FBgn0032284	CG7294	FBgn0053995	CG33995	FBgn0053995	CG33995	FBgn0259716	CG42370	FBgn0031675	CG9121	FBgn0031620	CG11929	FBgn0259715	CG42369	FBgn0085209	CG34180	FBgn0031364	CG17648
FBgn0086698	frtz	FBgn0261647	Axud1	FBgn0031398	CG10880	FBgn0031484	CG3165	FBgn0031603	CG15432	FBgn0031603	CG15432	FBgn0053003	CG33003	FBgn0031970	CG7227	FBgn0051915	CG31915	FBgn0260470	SP555	FBgn0016920	nompC	FBgn0031697	CG14024	FBgn0031580	CG15423	FBgn0031801	CG9498	FBgn0085339	CG34310	FBgn0032067	CG9465	FBgn0032286	CG7300	FBgn0031674	CG31919	FBgn0031674	CG31919	FBgn0031814	retm	FBgn0016660	H15	FBgn0031623	Taf12L	FBgn0031811	CG13982	FBgn0031771	CG9140	FBgn0031367	c-cup
FBgn0031377	CG15356	FBgn0031419	CG15390	FBgn0031399	mio	FBgn0031485	CG9643	FBgn0015834	Trip1	FBgn0025684	MFS18	FBgn0025684	MFS18	FBgn0031985	mon2	FBgn0031730	CG7236	FBgn0031697	CG14024	FBgn0004620	GluRIIA	FBgn0016920	nompC	FBgn0031581		FBgn0011722	Tig	FBgn0031860	CG11236	FBgn0032068	CG9466	FBgn0024740	Lip2	FBgn0031678	CG31918	FBgn0028694	Rpn11	FBgn0259749	mmy	FBgn0031715	tomb	FBgn0260428	CG42523	FBgn0031821	CG9542	FBgn0031800	CG9497	FBgn0051663	CG31663
FBgn0031384	CG4238	FBgn0031420	CG9866	FBgn0031403	CG15387	FBgn0031492	CG3542	FBgn0031657	CG3756	FBgn0031607	CG15440	FBgn0053113	Rtnl1	FBgn0032031	CG13390	FBgn0031734	CG11147	FBgn0031702	fusl	FBgn0051646	CG31646	FBgn0004620	GluRIIA	FBgn0003941	RpL40	FBgn0031813	CG9527	FBgn0031877	CG10399	FBgn0032069	CG9468	FBgn0263087	CG43355	FBgn0028694	Rpn11	FBgn0083028	snoRNA:Psi18S-525k	FBgn0028990	Spn27A	FBgn0031760	Tsp26A	FBgn0031634	Ir25a	FBgn0031854	TTLL3A	FBgn0031808	CG9507	FBgn0031372	CG7295
FBgn0003557	Su(dx)	FBgn0031429	CG15393	FBgn0031419	CG15390	FBgn0031493	CG3605	FBgn0010607	l(2)05714	FBgn0261606	RpL27A	FBgn0260451	CG14042	FBgn0016122	Acer	FBgn0031738	CG9171	FBgn0016920	nompC	FBgn0031732	CG11149	FBgn0031725	CG14010	FBgn0031602	CG15431	FBgn0086357	Sec61alpha	FBgn0003961	Uro	FBgn0032074	Tsp29Fa	FBgn0028490	CG31705	FBgn0031682	CG5828	FBgn0031747	CG9021	FBgn0031855	CG11221	FBgn0001089	Gal	FBgn0028572	qtc	FBgn0031857	CG11321	FBgn0031830	CoVb	FBgn0031378	CG15362
FBgn0028952	Kebab	FBgn0031434	insv	FBgn0031420	CG9866	FBgn0085435	CG34406	FBgn0031673	CG31650	FBgn0053002	mRpL27	FBgn0260470	SP555	FBgn0011259	Sema-1a	FBgn0026755	Ugt37b1	FBgn0016660	H15	FBgn0031763	CG13996	FBgn0051646	CG31646	FBgn0031604	Elp3	FBgn0031824	CG9547	FBgn0032002	CG8353	FBgn0032075	Tsp29Fb	FBgn0032400	CG6770	FBgn0031695	Cyp4ac3	FBgn0043362	bchs	FBgn0003046	Pcp	FBgn0031765	CG9109	FBgn0031681	pgant5	FBgn0031869	CG18304	FBgn0051635	CG31635	FBgn0043539	Obp22a
FBgn0031391	CG11723	FBgn0031435	CG9883	FBgn0031421		FBgn0031516	CG9663	FBgn0022023	eIF-3p40	FBgn0053113	Rtnl1	FBgn0031675	CG9121	FBgn0041092	tai	FBgn0011722	Tig	FBgn0004620	GluRIIA	FBgn0031770	CG13995	FBgn0031762	CG9098	FBgn0019982	Gs1l	FBgn0085339	CG34310	FBgn0032024	CG14273	FBgn0032076	CG9510	FBgn0262160	CG9932	FBgn0031717	Oscillin	FBgn0031752	CG9044	FBgn0031888	Pvf2	FBgn0051641	stai	FBgn0016076	vri	FBgn0263026	CG43321	FBgn0031857	CG11321	FBgn0053516	dpr3
FBgn0027509	CG7261	FBgn0031452	Cwc25	FBgn0000490	dpp	FBgn0005616	msl-2	FBgn0014857	His3.3A	FBgn0031670	CG3887	FBgn0003716	tkv	FBgn0259712	CG42366	FBgn0031850	Tsp	FBgn0031725	CG14010	FBgn0031791	CG9486	FBgn0031763	CG13996	FBgn0053002	mRpL27	FBgn0031860	CG11236	FBgn0040959	Peritrophin-15a	FBgn0032087	CG9568	FBgn0001961	Sop2	FBgn0031741	CG11034	FBgn0000308	chic	FBgn0085407	Pvf3	FBgn0053531	Ddr	FBgn0262097	CG42850	FBgn0002938	ninaC	FBgn0031896	CG4502	FBgn0004507	GlyP
FBgn0031392	AIF	FBgn0031456	Trn-SR	FBgn0031429	CG15393	FBgn0031540	CG3238	FBgn0003716	tkv	FBgn0260451	CG14042	FBgn0016076	vri	FBgn0011584	Trp1	FBgn0051632	sens-2	FBgn0051646	CG31646	FBgn0031835	CG11319	FBgn0031770	CG13995	FBgn0011603	ine	FBgn0031877	CG10399	FBgn0001114	Glt	FBgn0000640	Fbp2	FBgn0053306	CG33306	FBgn0031747	CG9021	FBgn0031760	Tsp26A	FBgn0031894	CG4496	FBgn0259714	CG42368	FBgn0086033	snoRNA:Me28S-A2486	FBgn0031908	CG5177	FBgn0002938	ninaC	FBgn0085201	CG34172
FBgn0031395	CG10874	FBgn0031458	aph-1	FBgn0026778	Rad1	FBgn0031549	Spindly	FBgn0261963	mid	FBgn0031673	CG31650	FBgn0031702	fusl	FBgn0041723	rho-5	FBgn0031887	CG11289	FBgn0031737	obst-E	FBgn0031865	Nha1	FBgn0040950	Muc26B	FBgn0085380	CG34351	FBgn0263133	ico	FBgn0032067	CG9465	FBgn0032131	CG3841	FBgn0028920	CG8997	FBgn0043362	bchs	FBgn0001089	Gal	FBgn0031897	CG13784	FBgn0031811	CG13982	FBgn0031716	CG14015	FBgn0031918	CG6055	FBgn0031906	CG5160	FBgn0031401	papi
FBgn0010288	Uch	FBgn0026324	Taf10b	FBgn0031437	p16-ARC	FBgn0024244	drm	FBgn0002525	Lam	FBgn0031675	CG9121	FBgn0261963	mid	FBgn0032252	CG6232	FBgn0031914	CG5973	FBgn0031738	CG9171	FBgn0031887	CG11289	FBgn0031791	CG9486	FBgn0031639	mRpS2	FBgn0262453	mir-275	FBgn0032068	CG9466	FBgn0032144	CG17633	FBgn0028533	CG7953	FBgn0031752	CG9044	FBgn0000052	ade2	FBgn0051909	CG31909	FBgn0051638	CG31638	FBgn0031730	CG7236	FBgn0031926	CG6739	FBgn0031912	CG5261	FBgn0051679	Tengl3
FBgn0085203	CG34174	FBgn0028398	Taf10	FBgn0031452	Cwc25	FBgn0004892	sob	FBgn0031726	Cyp6a16Psi	FBgn0022023	eIF-3p40	FBgn0051915	CG31915	FBgn0051721	Trim9	FBgn0020880	CG7179	FBgn0015381	dsf	FBgn0259111	Ndae1	FBgn0031835	CG11319	FBgn0051660	pog	FBgn0031929	CG18585	FBgn0032076	CG9510	FBgn0040064	yip2	FBgn0028936	nimB5	FBgn0000308	chic	FBgn0262317	mir-966	FBgn0031903	Wnt10	FBgn0086034	snoRNA:Me28S-G2743	FBgn0031765	CG9109	FBgn0031927		FBgn0260479	CG31904	FBgn0052463	Tengl2
FBgn0031398	CG10880	FBgn0031459	CG2862	FBgn0031453	CG9894	FBgn0002985	odd	FBgn0031736	CG11030	FBgn0014857	His3.3A	FBgn0020429	GluRIIB	FBgn0023496	Lip1	FBgn0031948	CG7149	FBgn0031762	CG9098	FBgn0011283	Pbprp5	FBgn0015776	nrv1	FBgn0031650	CG14044	FBgn0031930	CG7025	FBgn0012036	Aldh	FBgn0032160	CG4598	FBgn0028430	He	FBgn0031760	Tsp26A	FBgn0051641	stai	FBgn0031907	CG5171	FBgn0031866	neuroligin	FBgn0053531	Ddr	FBgn0031957	TwdlE	FBgn0031940	CG7214	FBgn0051682	Tengl1
FBgn0031413	CG9967	FBgn0031479	Prx6005	FBgn0031458	aph-1	FBgn0004893	bowl	FBgn0001942	eIF-4a	FBgn0003716	tkv	FBgn0031736	CG11030	FBgn0027550	CG6495	FBgn0031955	CG14535	FBgn0031763	CG13996	FBgn0040299	Myo28B1	FBgn0031865	Nha1	FBgn0031651	mRpL24	FBgn0020880	CG7179	FBgn0032136	CG15828	FBgn0032161	CG4594	FBgn0259896	nimC1	FBgn0000052	ade2	FBgn0259716	CG42370	FBgn0031914	CG5973	FBgn0031872	ihog	FBgn0261699	CR42735	FBgn0083970	CG34134	FBgn0083970	CG34134	FBgn0262106	CR42859
FBgn0261647	Axud1	FBgn0024947	NTPase	FBgn0026324	Taf10b	FBgn0003430	slp1	FBgn0025742	mtm	FBgn0261963	mid	FBgn0031745	CG8965	FBgn0032343	CG6201	FBgn0263256	CG43394	FBgn0031770	CG13995	FBgn0031929	CG18585	FBgn0031887	CG11289	FBgn0031654	Jon25Bii	FBgn0083968	CG34132	FBgn0032160	CG4598	FBgn0262428	mir-87	FBgn0028939	nimC2	FBgn0031791	CG9486	FBgn0051634	Oatp26F	FBgn0031923	CG13791	FBgn0051907	CG31907	FBgn0259714	CG42368	FBgn0031999	CG8419	FBgn0032023	CG14274	FBgn0031407	CG4270
FBgn0031419	CG15390	FBgn0041111	lilli	FBgn0028398	Taf10	FBgn0004567	slp2	FBgn0031769	CG9135	FBgn0051915	CG31915	FBgn0043362	bchs	FBgn0032362	spz4	FBgn0032002	CG8353	FBgn0026755	Ugt37b1	FBgn0031930	CG7025	FBgn0031893	CG4495	FBgn0020906	Jon25Bi	FBgn0032015	CG7830	FBgn0032161	CG4594	FBgn0032235	CG5096	FBgn0028537	CG31775	FBgn0259716	CG42370	FBgn0051636	CG31636	FBgn0262880	CG43235	FBgn0031888	Pvf2	FBgn0259715	CG42369	FBgn0032013	Scgalpha	FBgn0001137	grk	FBgn0054049	CG34049
FBgn0031420	CG9866	FBgn0260639	gammaTub23C	FBgn0031479	Prx6005	FBgn0000547	ed	FBgn0085409	CG34380	FBgn0002525	Lam	FBgn0031762	CG9098	FBgn0015400	kek2	FBgn0032006	Pvr	FBgn0011722	Tig	FBgn0031945	CG7191	FBgn0259111	Ndae1	FBgn0031657	CG3756	FBgn0032024	CG14273	FBgn0032162	CG4592	FBgn0262782	Mdh1	FBgn0085195	CG34166	FBgn0028703	Nhe3	FBgn0025595	GRHR	FBgn0041182	TepII	FBgn0085407	Pvf3	FBgn0031811	CG13982	FBgn0032021	CG7781	FBgn0032083	CG9541	FBgn0250841	CG17242
FBgn0031422	CG9870	FBgn0025109	Bem46	FBgn0024947	NTPase	FBgn0086032	snoRNA:Me28S-C437	FBgn0086357	Sec61alpha	FBgn0031717	Oscillin	FBgn0001170	H2.0	FBgn0032394	CG6746	FBgn0032029	CG17292	FBgn0031835	CG11319	FBgn0020880	CG7179	FBgn0045495	Gr28b	FBgn0031660	mRpL28	FBgn0027094	Aats-ala	FBgn0032184	CG13135	FBgn0027611	CG6206	FBgn0260955	CG42587	FBgn0025595	GRHR	FBgn0086034	snoRNA:Me28S-G2743	FBgn0031939	CG13796	FBgn0031894	CG4496	FBgn0031821	CG9542	FBgn0032023	CG14274	FBgn0015316	Try29F	FBgn0031409	CG4271
FBgn0011818	oaf	FBgn0002989	okr	FBgn0004584	Rrp1	FBgn0014033	Sr-CI	FBgn0051638	CG31638	FBgn0031736	CG11030	FBgn0031776	CG13993	FBgn0015797	Rab6	FBgn0032040	CG13386	FBgn0031854	TTLL3A	FBgn0025687	LKR	FBgn0260486	CG42533	FBgn0031662	CG3792	FBgn0032033	CG13392	FBgn0032205	CG4957	FBgn0032281	CG17107	FBgn0028886	CG15279	FBgn0000053	ade3	FBgn0000053	ade3	FBgn0040099	lectin-28C	FBgn0051909	CG31909	FBgn0051637	CG31637	FBgn0001137	grk	FBgn0052982	CG32982	FBgn0261523	CG42658
FBgn0026778	Rad1	FBgn0031492	CG3542	FBgn0260639	gammaTub23C	FBgn0001075	ft	FBgn0000320	eya	FBgn0031745	CG8965	FBgn0028419	Kr-h2	FBgn0262475	bru-2	FBgn0263314	CG43400	FBgn0051632	sens-2	FBgn0045038	Proct	FBgn0011283	Pbprp5	FBgn0022023	eIF-3p40	FBgn0032053	mRpL51	FBgn0054043	CG34043	FBgn0032283	CG7296	FBgn0028518	CG18480	FBgn0003046	Pcp	FBgn0040954	CG13779	FBgn0031957	TwdlE	FBgn0031903	Wnt10	FBgn0031850	Tsp	FBgn0040963	CG18662	FBgn0026439	Eaat1	FBgn0031410	CG17237
FBgn0031435	CG9883	FBgn0031493	CG3605	FBgn0031484	CG3165	FBgn0031590	CG3702	FBgn0031832	CG9596	FBgn0001942	eIF-4a	FBgn0028420	Kr-h1	FBgn0032436	CG5418	FBgn0001114	Glt	FBgn0031887	CG11289	FBgn0031975	Tg	FBgn0040299	Myo28B1	FBgn0065104	snmRNA:158	FBgn0032057	CG9287	FBgn0262782	Mdh1	FBgn0032286	CG7300	FBgn0041183	TepI	FBgn0040954	CG13779	FBgn0031888	Pvf2	FBgn0031959	spz3	FBgn0031923	CG13791	FBgn0031866	neuroligin	FBgn0051609	CG31609	FBgn0032129	jp	FBgn0028570	robl22E
FBgn0026479	Drp1	FBgn0031495	GABPI	FBgn0031485	CG9643	FBgn0026319	Traf4	FBgn0026585		FBgn0001170	H2.0	FBgn0261697	tectonic	FBgn0261812	CG42754	FBgn0032059	PrBP	FBgn0259111	Ndae1	FBgn0032022	CG14275	FBgn0031929	CG18585	FBgn0031697	CG14024	FBgn0032058	CG9289	FBgn0032247	CG5188	FBgn0024740	Lip2	FBgn0028514	CG4793	FBgn0031894	CG4496	FBgn0031896	CG4502	FBgn0085450	Snoo	FBgn0041182	TepII	FBgn0031869	CG18304	FBgn0028433	Ggamma30A	FBgn0032147	IP3K1	FBgn0051949	CG31949
FBgn0031449	CG31689	FBgn0003934	snRNA:U5:23D	FBgn0025109	Bem46	FBgn0031601	Dim1	FBgn0051634	Oatp26F	FBgn0031764	CG9107	FBgn0085409	CG34380	FBgn0262194	mir-2489	FBgn0032084	CG13101	FBgn0031914	CG5973	FBgn0032048	Dh31	FBgn0031930	CG7025	FBgn0031703	CG12512	FBgn0032068	CG9466	FBgn0032282	CG7299	FBgn0262683	CG43153	FBgn0028515	EndoGI	FBgn0031908	CG5177	FBgn0031897	CG13784	FBgn0031968	CG7231	FBgn0031939	CG13796	FBgn0031879	uif	FBgn0262036	CG42847	FBgn0032178	Spn31A	FBgn0031417	CG3597
FBgn0031452	Cwc25	FBgn0011648	Mad	FBgn0002989	okr	FBgn0031603	CG15432	FBgn0031851	CG11188	FBgn0025742	mtm	FBgn0031816	CG16947	FBgn0051813	CG31813	FBgn0032087	CG9568	FBgn0260486	CG42533	FBgn0032075	Tsp29Fb	FBgn0041181	TepIII	FBgn0051646	CG31646	FBgn0032088	CG13102	FBgn0032283	CG7296	FBgn0028490	CG31705	FBgn0032615	CG6012	FBgn0031910	CG15818	FBgn0031907	CG5171	FBgn0031970	CG7227	FBgn0040099	lectin-28C	FBgn0263026	CG43321	FBgn0032125	Cpr30B	FBgn0032181	CG13133	FBgn0031423	CG3557
FBgn0031456	Trn-SR	FBgn0085435	CG34406	FBgn0031492	CG3542	FBgn0027609	morgue	FBgn0026196	nop5	FBgn0028419	Kr-h2	FBgn0086357	Sec61alpha	FBgn0027929	nimB1	FBgn0032088	CG13102	FBgn0011283	Pbprp5	FBgn0011705	rost	FBgn0031945	CG7191	FBgn0031763	CG13996	FBgn0012036	Aldh	FBgn0032287	CG6415	FBgn0032373	Vha100-5	FBgn0040985	CG6115	FBgn0031913	CG5958	FBgn0031910	CG15818	FBgn0031971	CG7224	FBgn0085450	Snoo	FBgn0051907	CG31907	FBgn0032129	jp	FBgn0083945	CG34109	FBgn0051948	CG31948
FBgn0031459	CG2862	FBgn0031519	CG3326	FBgn0031493	CG3605	FBgn0031607	CG15440	FBgn0031873	Gas41	FBgn0028420	Kr-h1	FBgn0031829	osm-6	FBgn0054003	nimB3	FBgn0051708	CG31708	FBgn0041181	TepIII	FBgn0032085	CG9555	FBgn0020880	CG7179	FBgn0031765	CG9109	FBgn0028479	Mtpalpha	FBgn0004363	porin	FBgn0263234	Phae1	FBgn0032639	CG18563	FBgn0025697	santa-maria	FBgn0031913	CG5958	FBgn0031973	Spn28D	FBgn0031968	CG7231	FBgn0085407	Pvf3	FBgn0051709	CG31709	FBgn0032266	CG18302	FBgn0085476	CG34447
FBgn0031464	Duox	FBgn0031529	CG9662	FBgn0031494	CG17219	FBgn0031631	CG3225	FBgn0020616	SA	FBgn0031779	CG9175	FBgn0051634	Oatp26F	FBgn0028542	nimB4	FBgn0032100	CG13108	FBgn0020880	CG7179	FBgn0032086	CG17906	FBgn0031948	CG7149	FBgn0031770	CG13995	FBgn0040070	Trx-2	FBgn0040211	hgo	FBgn0032436	CG5418	FBgn0032652	CG6870	FBgn0031939	CG13796	FBgn0025697	santa-maria	FBgn0261822	Bsg	FBgn0031971	CG7224	FBgn0051909	CG31909	FBgn0032135	GlcAT-S	FBgn0040496	CG17104	FBgn0031428	CG9886
FBgn0051694	CG31694	FBgn0005616	msl-2	FBgn0085435	CG34406	FBgn0031635	CG15626	FBgn0026170	smt3	FBgn0031781	Arc-p20	FBgn0031842	Tango1	FBgn0028904	CG16879	FBgn0041092	tai	FBgn0031948	CG7149	FBgn0085395	Shawl	FBgn0025687	LKR	FBgn0031777	CG9154	FBgn0032136	CG15828	FBgn0262683	CG43153	FBgn0001961	Sop2	FBgn0051741	CG31741	FBgn0011230	poe	FBgn0260486	CG42533	FBgn0263256	CG43394	FBgn0261831	CG42763	FBgn0031903	Wnt10	FBgn0000273	Pka-C1	FBgn0051869	CG31869	FBgn0031430	CG3528
FBgn0031478	CG8814	FBgn0031540	CG3238	FBgn0031516	CG9663	FBgn0031655	Marcal1	FBgn0016978	snRNP-U1-70K	FBgn0261697	tectonic	FBgn0015776	nrv1	FBgn0028906	CG17341	FBgn0040070	Trx-2	FBgn0025687	LKR	FBgn0032116	CG3759	FBgn0031955	CG14535	FBgn0040950	Muc26B	FBgn0025700	CG5885	FBgn0262203	mir-967	FBgn0053307	CG33307	FBgn0032669	CG15155	FBgn0261822	Bsg	FBgn0031923	CG13791	FBgn0032017	CG7810	FBgn0051606	CG31606	FBgn0031918	CG6055	FBgn0051876	Cpr30F	FBgn0262599	CG43129	FBgn0031436	CG3214
FBgn0031479	Prx6005	FBgn0002985	odd	FBgn0031519	CG3326	FBgn0015834	Trip1	FBgn0085407	Pvf3	FBgn0031814	retm	FBgn0015777	nrv2	FBgn0263038	CG43333	FBgn0051710	CG31710	FBgn0031955	CG14535	FBgn0028704	Nckx30C	FBgn0045038	Proct	FBgn0031824	CG9547	FBgn0032160	CG4598	FBgn0032449	CG17036	FBgn0053306	CG33306	FBgn0262456	mir-125	FBgn0031992	CG8498	FBgn0041182	TepII	FBgn0032018	CG7806	FBgn0027932	Akap200	FBgn0260486	CG42533	FBgn0083945	CG34109	FBgn0010612	l(2)06225	FBgn0250835	CG15394
FBgn0041111	lilli	FBgn0000721	for	FBgn0005616	msl-2	FBgn0010607	l(2)05714	FBgn0010453	Wnt4	FBgn0086357	Sec61alpha	FBgn0051632	sens-2	FBgn0261563	wb	FBgn0028675	Sur	FBgn0031959	spz3	FBgn0032151	nAcRalpha-30D	FBgn0031974	CG12560	FBgn0031835	CG11319	FBgn0032166	CG4619	FBgn0004191	snRNA:U2:34ABa	FBgn0028920	CG8997	FBgn0051789	CG31789	FBgn0032000	CG8372	FBgn0031939	CG13796	FBgn0032036	CG13384	FBgn0262029	d	FBgn0031926	CG6739	FBgn0032192	CG5731	FBgn0032337	Ast-CC	FBgn0053125	CG33125
FBgn0024920	Ts	FBgn0031573	CG3407	FBgn0031540	CG3238	FBgn0031661	Gmd	FBgn0004009	wg	FBgn0027496	epsilonCOP	FBgn0010453	Wnt4	FBgn0004858	elB	FBgn0032209	Hand	FBgn0031975	Tg	FBgn0032167	CG5853	FBgn0031975	Tg	FBgn0026196	nop5	FBgn0032195	CG4908	FBgn0032498	CG6108	FBgn0028534	CG7916	FBgn0032704	Jwa	FBgn0032005	Snx6	FBgn0027515	CG7115	FBgn0027932	Akap200	FBgn0053194	CheA29a	FBgn0031934	Ntl	FBgn0032205	CG4957	FBgn0259822	Ca-beta	FBgn0026395	Or23a
FBgn0260639	gammaTub23C	FBgn0051957	CG31957	FBgn0031549	Spindly	FBgn0031664	CG8892	FBgn0031902	Wnt6	FBgn0000320	eya	FBgn0031907	CG5171	FBgn0003016	osp	FBgn0027491	Cdk5alpha	FBgn0263256	CG43394	FBgn0053301	CG33301	FBgn0261822	Bsg	FBgn0031877	CG10399	FBgn0032205	CG4957	FBgn0053307	CG33307	FBgn0028533	CG7953	FBgn0260228	CG42502	FBgn0032018	CG7806	FBgn0031959	spz3	FBgn0028394	CG17834	FBgn0085427	CG34398	FBgn0031941	CG7211	FBgn0260750	Mulk	FBgn0051706	CG31706	FBgn0031443	Prosbeta4R2
FBgn0031483	CG9641	FBgn0051961	CG31961	FBgn0002985	odd	FBgn0031673	CG31650	FBgn0031904	CG5149	FBgn0031829	osm-6	FBgn0031937	CG13795	FBgn0000317	ck	FBgn0041723	rho-5	FBgn0013442	fos28F	FBgn0053302	Cpr31A	FBgn0031990	CG8552	FBgn0263133	ico	FBgn0260750	Mulk	FBgn0032538	CG16885	FBgn0028532	CG7968	FBgn0015808	ScpX	FBgn0051901	Mur29B	FBgn0031968	CG7231	FBgn0003209	raw	FBgn0040964	CG18661	FBgn0262546	CG43100	FBgn0032210	CYLD	FBgn0032381	Mal-B1	FBgn0031444	CG9879
FBgn0031484	CG3165	FBgn0031592	Art2	FBgn0015376	cutlet	FBgn0014857	His3.3A	FBgn0085403	Rapgap1	FBgn0026585		FBgn0261800	LanB1	FBgn0024183	vig	FBgn0032252	CG6232	FBgn0032002	CG8353	FBgn0032180	CG31714	FBgn0263256	CG43394	FBgn0011283	Pbprp5	FBgn0053303	CG33303	FBgn0028544	CG16884	FBgn0028543	nimB2	FBgn0053120	CG33120	FBgn0040958	Peritrophin-15b	FBgn0031976	CG7367	FBgn0261630	CG42713	FBgn0051609	CG31609	FBgn0040099	lectin-28C	FBgn0032221	CG5375	FBgn0261805	CG42751	FBgn0031451	CG9961
FBgn0250786	Chd1	FBgn0031597	CG17612	FBgn0003430	slp1	FBgn0083028	snoRNA:Psi18S-525k	FBgn0031937	CG13795	FBgn0051634	Oatp26F	FBgn0083968	CG34132	FBgn0028879	CG15270	FBgn0051719	RluA-1	FBgn0032022	CG14275	FBgn0032181	CG13133	FBgn0013442	fos28F	FBgn0031945	CG7191	FBgn0032247	CG5188	FBgn0028543	nimB2	FBgn0054003	nimB3	FBgn0032727	CG10623	FBgn0026718	fu12	FBgn0011230	poe	FBgn0052982	CG32982	FBgn0032104	aust	FBgn0031971	CG7224	FBgn0032233	dpr19	FBgn0032402	CG14945	FBgn0250906	Pgk
FBgn0025109	Bem46	FBgn0261976	Psf2	FBgn0004567	slp2	FBgn0003716	tkv	FBgn0031951	r2d2	FBgn0031851	CG11188	FBgn0031970	CG7227	FBgn0028878	CG15269	FBgn0051721	Trim9	FBgn0032029	CG17292	FBgn0262032	CG42843	FBgn0032021	CG7781	FBgn0025687	LKR	FBgn0032261	CG6094	FBgn0054003	nimB3	FBgn0028936	nimB5	FBgn0032733	CG15170	FBgn0028394	CG17834	FBgn0261822	Bsg	FBgn0032130	CG3838	FBgn0262033	CG42844	FBgn0031986	CG8673	FBgn0032247	CG5188	FBgn0029137	Patsas	FBgn0031462	CG2964
FBgn0002989	okr	FBgn0031601	Dim1	FBgn0051957	CG31957	FBgn0261963	mid	FBgn0261800	LanB1	FBgn0015777	nrv2	FBgn0031974	CG12560	FBgn0028862	dao	FBgn0051871	CG31871	FBgn0262001	CG42819	FBgn0032187	CG4839	FBgn0032022	CG14275	FBgn0020618	Rack1	FBgn0032282	CG7299	FBgn0028936	nimB5	FBgn0028430	He	FBgn0046302	CG10650	FBgn0003209	raw	FBgn0031992	CG8498	FBgn0032140	CG13117	FBgn0032132	CG4382	FBgn0261831	CG42763	FBgn0032260	CG13144	FBgn0051862	CG31862	FBgn0031472	CG2983
FBgn0025681	CG3558	FBgn0031606	CG15439	FBgn0031590	CG3702	FBgn0051989	Cap-D3	FBgn0054010	CG34010	FBgn0031873	Gas41	FBgn0054010	CG34010	FBgn0051823	CG31823	FBgn0040496	CG17104	FBgn0032040	CG13386	FBgn0051720	CG31720	FBgn0032023	CG14274	FBgn0045038	Proct	FBgn0032286	CG7300	FBgn0028526	CG15293	FBgn0028940	Cyp28a5	FBgn0032774	CG17549	FBgn0032074	Tsp29Fa	FBgn0032005	Snx6	FBgn0032167	CG5853	FBgn0032140	CG13117	FBgn0051606	CG31606	FBgn0032261	CG6094	FBgn0020368	Vha68-1	FBgn0031476	CG8813
FBgn0031491	alpha4GT1	FBgn0031607	CG15440	FBgn0026319	Traf4	FBgn0014189	Hel25E	FBgn0031977	baf	FBgn0016978	snRNP-U1-70K	FBgn0020240	Mcr	FBgn0040079	pkaap	FBgn0023496	Lip1	FBgn0263314	CG43400	FBgn0024248	chico	FBgn0263314	CG43400	FBgn0031980	RpL36A	FBgn0032304	CG17134	FBgn0051769	CG31769	FBgn0085195	CG34166	FBgn0032824	CG13962	FBgn0041092	tai	FBgn0032006	Pvr	FBgn0027600	obst-B	FBgn0042174	CR18854	FBgn0031992	CG8498	FBgn0085190	CG34161	FBgn0032484	kek4	FBgn0010263	Rbp9
FBgn0031492	CG3542	FBgn0031609	CG15443	FBgn0031598	CG3338	FBgn0002525	Lam	FBgn0031981	CG7466	FBgn0010453	Wnt4	FBgn0031985	mon2	FBgn0001995	mRpL4	FBgn0032297	CG17124	FBgn0001114	Glt	FBgn0086347	Myo31DF	FBgn0032048	Dh31	FBgn0065055	snoRNA:Psi28S-2648	FBgn0004363	porin	FBgn0261534	l(2)34Fc	FBgn0086691	UK114	FBgn0083034	snoRNA:Psi18S-525e	FBgn0000640	Fbp2	FBgn0032017	CG7810	FBgn0053301	CG33301	FBgn0051712	CG31712	FBgn0032013	Scgalpha	FBgn0032299	CG17127	FBgn0032494	CG5945	FBgn0031501	CG17261
FBgn0031495	GABPI	FBgn0031610	CG15436	FBgn0261976	Psf2	FBgn0031726	Cyp6a16Psi	FBgn0010287	Trf	FBgn0031909	CG5181	FBgn0032006	Pvr	FBgn0062978	CG31808	FBgn0032299	CG17127	FBgn0261629	CG42712	FBgn0032284	CG7294	FBgn0032075	Tsp29Fb	FBgn0013442	fos28F	FBgn0032373	Vha100-5	FBgn0028871	Cpr35B	FBgn0028945	CG7631	FBgn0083032	snoRNA:Psi18S-525g	FBgn0004868	Gdi	FBgn0032018	CG7806	FBgn0024320	Npc1a	FBgn0032175	CG13131	FBgn0262598	mtsh	FBgn0004363	porin	FBgn0032497	CG6043	FBgn0042627	v(2)k05816
FBgn0031498	CG17260	FBgn0000227	Bsg25A	FBgn0031601	Dim1	FBgn0024191	sip1	FBgn0020240	Mcr	FBgn0031951	r2d2	FBgn0003502	Btk29A	FBgn0032598	ChLD3	FBgn0032343	CG6201	FBgn0032083	CG9541	FBgn0011676	Nos	FBgn0032084	CG13101	FBgn0032021	CG7781	FBgn0032399	CG6785	FBgn0000055	Adh	FBgn0028518	CG18480	FBgn0032945	CG8665	FBgn0032124	CG17855	FBgn0032024	CG14273	FBgn0032202	CG18619	FBgn0032188	CG13137	FBgn0032032	CG17294	FBgn0262599	CG43129	FBgn0028406	Drep-4	FBgn0003934	snRNA:U5:23D
FBgn0243513	cnir	FBgn0031621	CG15634	FBgn0031603	CG15432	FBgn0031736	CG11030	FBgn0261830	CG42762	FBgn0261800	LanB1	FBgn0032015	CG7830	FBgn0086673	CG13272	FBgn0015400	kek2	FBgn0032084	CG13101	FBgn0261871	dpr2	FBgn0011705	rost	FBgn0032024	CG14273	FBgn0032407	Pex19	FBgn0028537	CG31775	FBgn0028514	CG4793	FBgn0000546	EcR	FBgn0042174	CR18854	FBgn0032025	CG7778	FBgn0032213	CG5390	FBgn0032213	CG5390	FBgn0032040	CG13386	FBgn0261871	dpr2	FBgn0032502		FBgn0005779	PpD6
FBgn0011648	Mad	FBgn0031628	CG3294	FBgn0031607	CG15440	FBgn0031740	CG7239	FBgn0031993	Piezo	FBgn0020618	Rack1	FBgn0041717	snRNA:U6atac:29B	FBgn0032614	CG13284	FBgn0032422	atilla	FBgn0051708	CG31708	FBgn0032322	CG16743	FBgn0032085	CG9555	FBgn0010265	RpS13	FBgn0263235	Phae2	FBgn0086691	UK114	FBgn0028515	EndoGI	FBgn0033093	CG3270	FBgn0040064	yip2	FBgn0051901	Mur29B	FBgn0032297	CG17124	FBgn0032221	CG5375	FBgn0085427	CG34398	FBgn0032337	Ast-CC	FBgn0032504		FBgn0031504	CG15403
FBgn0260817	gkt	FBgn0031631	CG3225	FBgn0031609	CG15443	FBgn0031745	CG8965	FBgn0015299	Ssb-c31a	FBgn0083968	CG34132	FBgn0014417	CG13397	FBgn0032629	beat-IIIc	FBgn0032435	Oatp33Eb	FBgn0032100	CG13108	FBgn0032336	Ast-C	FBgn0032086	CG17906	FBgn0032031	CG13390	FBgn0032449	CG17036	FBgn0028945	CG7631	FBgn0047133	pncr003:2L	FBgn0033112	Spn42Db	FBgn0032170	CG4658	FBgn0026718	fu12	FBgn0261983	l(2)gd1	FBgn0027568	Cand1	FBgn0032094	CG12439	FBgn0259822	Ca-beta	FBgn0032511	CG9306	FBgn0031505	CG12400
FBgn0051953	CR31953	FBgn0031632	CG15628	FBgn0031628	CG3294	FBgn0001942	eIF-4a	FBgn0003502	Btk29A	FBgn0054010	CG34010	FBgn0016122	Acer	FBgn0015609	CadN	FBgn0032436	CG5418	FBgn0041092	tai	FBgn0028490	CG31705	FBgn0051708	CG31708	FBgn0041717	snRNA:U6atac:29B	FBgn0032453	CG6180	FBgn0051780	CG31780	FBgn0032615	CG6012	FBgn0033113	Spn42Dc	FBgn0051720	CG31720	FBgn0028394	CG17834	FBgn0032358	Ppt2	FBgn0032230	lft	FBgn0051609	CG31609	FBgn0051706	CG31706	FBgn0261855		FBgn0031517	CG15406
FBgn0014906	Hydr2	FBgn0031633	CG2976	FBgn0031631	CG3225	FBgn0031764	CG9107	FBgn0261020	wol	FBgn0031980	RpL36A	FBgn0011259	Sema-1a	FBgn0000636	Fas3	FBgn0032437	CR17024	FBgn0032116	CG3759	FBgn0032373	Vha100-5	FBgn0085395	Shawl	FBgn0032048	Dh31	FBgn0020367		FBgn0020414	Idgf3	FBgn0032639	CG18563	FBgn0033129	Tsp42Eh	FBgn0051717	CG31717	FBgn0003209	raw	FBgn0032366	CG14930	FBgn0032233	dpr19	FBgn0032100	CG13108	FBgn0085191	CG34162	FBgn0263206	CG43376	FBgn0031522	CG3285
FBgn0085435	CG34406	FBgn0031636	CG12194	FBgn0031632	CG15628	FBgn0025742	mtm	FBgn0032020	CG7787	FBgn0065055	snoRNA:Psi28S-2648	FBgn0032079	CG31886	FBgn0032681	CG10283	FBgn0262353	CG43051	FBgn0028704	Nckx30C	FBgn0259225	Pde1c	FBgn0032116	CG3759	FBgn0032053	mRpL51	FBgn0032477	CG5287	FBgn0086783		FBgn0002939	ninaD	FBgn0033133	Tsp42Ek	FBgn0032200	CG5676	FBgn0261630	CG42713	FBgn0262786	CG43167	FBgn0032246	CG5168	FBgn0032104	aust	FBgn0028412	Mst33A	FBgn0000153	b	FBgn0031523	CG15408
FBgn0031519	CG3326	FBgn0031638	CG11927	FBgn0031635	CG15626	FBgn0031769	CG9135	FBgn0011259	Sema-1a	FBgn0020240	Mcr	FBgn0032119	CG3769	FBgn0032685	CG10211	FBgn0051729	CG31729	FBgn0032151	nAcRalpha-30D	FBgn0010497	dmGlut	FBgn0000273	Pka-C1	FBgn0032086	CG17906	FBgn0260407	mRpS23	FBgn0000406	Cyt-b5-r	FBgn0051741	CG31741	FBgn0033137	Tsp42Ep	FBgn0032202	CG18619	FBgn0032078	C1GalTA	FBgn0032400	CG6770	FBgn0032294	Vha16-5	FBgn0262033	CG42844	FBgn0261805	CG42751	FBgn0032536	Ance-3	FBgn0031526	CG8838
FBgn0020445	E23	FBgn0031640	CG11926	FBgn0031645	CG3036	FBgn0031781	Arc-p20	FBgn0032078	C1GalTA	FBgn0031992	CG8498	FBgn0002973	numb	FBgn0032692	CG15161	FBgn0028546	ics	FBgn0262428	mir-87	FBgn0051760	CG31760	FBgn0028704	Nckx30C	FBgn0032088	CG13102	FBgn0028532	CG7968	FBgn0032603	CG17928	FBgn0032669	CG15155	FBgn0033139	Tsp42Er	FBgn0032216	CG5384	FBgn0000640	Fbp2	FBgn0032405	CG14946	FBgn0032297	CG17124	FBgn0085210	CG34181	FBgn0005664	Cry	FBgn0261514	nimA	FBgn0031528	CG15412
FBgn0085423	CG34394	FBgn0031643	CG3008	FBgn0031655	Marcal1	FBgn0031782	WDR79	FBgn0032079	CG31886	FBgn0032000	CG8372	FBgn0032123	Oatp30B	FBgn0263079	CG43338	FBgn0051814	CG31814	FBgn0053301	CG33301	FBgn0032422	atilla	FBgn0032151	nAcRalpha-30D	FBgn0051708	CG31708	FBgn0028855	CG15282	FBgn0040260	Ugt36Bc	FBgn0051789	CG31789	FBgn0015039	Cyp9b2	FBgn0051715	CG31715	FBgn0004868	Gdi	FBgn0043841	vir-1	FBgn0051869	CG31869	FBgn0085395	Shawl	FBgn0032385	CG16964	FBgn0016930	smi35A	FBgn0259949	Sfp23F
FBgn0031529	CG9662	FBgn0083961	CG34125	FBgn0015834	Trip1	FBgn0085409	CG34380	FBgn0032082	CG18088	FBgn0032020	CG7787	FBgn0014179	gcm	FBgn0045852	ham	FBgn0051813	CG31813	FBgn0053302	Cpr31A	FBgn0032433	Oatp33Ea	FBgn0063391	snoRNA:U14:30Eb	FBgn0085395	Shawl	FBgn0028537	CG31775	FBgn0047133	pncr003:2L	FBgn0032704	Jwa	FBgn0033170	sPLA2	FBgn0032246	CG5168	FBgn0032124	CG17855	FBgn0259176	bun	FBgn0032305	CG6700	FBgn0262036	CG42847	FBgn0029137	Patsas	FBgn0261534	l(2)34Fc	FBgn0085204	CG34175
FBgn0016698	Ptpa	FBgn0015834	Trip1	FBgn0010607	l(2)05714	FBgn0021873	Gef26	FBgn0032123	Oatp30B	FBgn0010265	RpS13	FBgn0019809	gcm2	FBgn0032741	Side	FBgn0028938	CG16886	FBgn0032180	CG31714	FBgn0032435	Oatp33Eb	FBgn0032167	CG5853	FBgn0012036	Aldh	FBgn0028948	CG15253	FBgn0032668	CG17681	FBgn0260228	CG42502	FBgn0033221	CG12825	FBgn0032305	CG6700	FBgn0051710	CG31710	FBgn0032451	spict	FBgn0032330	Samuel	FBgn0032117	FucTB	FBgn0032415	rho-6	FBgn0032546	pburs	FBgn0031531	CG8840
FBgn0031535	CG12795	FBgn0010607	l(2)05714	FBgn0031661	Gmd	FBgn0031822	CG9548	FBgn0014179	gcm	FBgn0032035		FBgn0032136	CG15828	FBgn0032753	CG17572	FBgn0027929	nimB1	FBgn0028675	Sur	FBgn0032437	CR17024	FBgn0053302	Cpr31A	FBgn0032116	CG3759	FBgn0028945	CG7631	FBgn0032715	CG17597	FBgn0032715	CG17597	FBgn0033222	CG12824	FBgn0027363	Stam	FBgn0032140	CG13117	FBgn0015399	kek1	FBgn0032337	Ast-CC	FBgn0051709	CG31709	FBgn0032419	CG17217	FBgn0086711	mol	FBgn0051952	CG31952
FBgn0031536	Cog3	FBgn0031663	CG8891	FBgn0031664	CG8892	FBgn0051638	CG31638	FBgn0019809	gcm2	FBgn0001084	fy	FBgn0063449	Uhg2	FBgn0002023	Lim3	FBgn0054003	nimB3	FBgn0027491	Cdk5alpha	FBgn0032442	CG15485	FBgn0032180	CG31714	FBgn0040070	Trx-2	FBgn0051821	CG31821	FBgn0032729	CG10639	FBgn0015808	ScpX	FBgn0029093	cathD	FBgn0032330	Samuel	FBgn0042174	CR18854	FBgn0028406	Drep-4	FBgn0032338	CG16854	FBgn0032132	CG4382	FBgn0051862	CG31862	FBgn0028853	CG15263	FBgn0021967	Pdsw
FBgn0031537	sec5	FBgn0031668	CG31917	FBgn0031668	CG31917	FBgn0000320	eya	FBgn0032138	CG4364	FBgn0014417	CG13397	FBgn0063391	snoRNA:U14:30Eb	FBgn0000075	amd	FBgn0028542	nimB4	FBgn0041723	rho-5	FBgn0032456	MRP	FBgn0262032	CG42843	FBgn0032136	CG15828	FBgn0027779	VhaSFD	FBgn0032773	fon	FBgn0053120	CG33120	FBgn0002531	Lcp1	FBgn0261983	l(2)gd1	FBgn0040064	yip2	FBgn0028932	CG16890	FBgn0000287	salr	FBgn0053299	CG33299	FBgn0032462	CG16800	FBgn0001989	l(2)35Di	FBgn0014396	tim
FBgn0031540	CG3238	FBgn0031670	CG3887	FBgn0031670	CG3887	FBgn0031832	CG9596	FBgn0022720	zf30C	FBgn0032053	mRpL51	FBgn0063392	snoRNA:U14:30Ea	FBgn0032798	CG10132	FBgn0028904	CG16879	FBgn0032252	CG6232	FBgn0020367		FBgn0032187	CG4839	FBgn0015393	hoip	FBgn0000406	Cyt-b5-r	FBgn0032790	CG10194	FBgn0032733	CG15170	FBgn0002533	Lcp2	FBgn0032350	CG6287	FBgn0032172	CG5850	FBgn0019890	Smg5	FBgn0032366	CG14930	FBgn0051710	CG31710	FBgn0020368	Vha68-1	FBgn0028507	CG3793	FBgn0031545	CG3213
FBgn0053123	CG33123	FBgn0031673	CG31650	FBgn0031673	CG31650	FBgn0026585		FBgn0011291	Taf11	FBgn0260861	Trs23	FBgn0025881	snoRNA:Me18S-A1576	FBgn0032800	CG10137	FBgn0028906	CG17341	FBgn0051719	RluA-1	FBgn0026760	Tehao	FBgn0051720	CG31720	FBgn0028704	Nckx30C	FBgn0040260	Ugt36Bc	FBgn0032801	CG10165	FBgn0046302	CG10650	FBgn0002534	Lcp3	FBgn0032358	Ppt2	FBgn0024320	Npc1a	FBgn0261628	CG42711	FBgn0085191	CG34162	FBgn0032143	CG4017	FBgn0032484	kek4	FBgn0051826	CG31826	FBgn0031546	CG8851
FBgn0031544	CG17593	FBgn0262213	mir-2495	FBgn0022023	eIF-3p40	FBgn0031836	CG11050	FBgn0032149	CG4036	FBgn0032119	CG3769	FBgn0053300	Muc30E	FBgn0032811	CG10268	FBgn0263038	CG43333	FBgn0086347	Myo31DF	FBgn0051814	CG31814	FBgn0024248	chico	FBgn0025117	und	FBgn0086673	CG13272	FBgn0041180	TepIV	FBgn0032773	fon	FBgn0002535	Lcp4	FBgn0263087	CG43355	FBgn0250843	Pros35	FBgn0261514	nimA	FBgn0032368	spag4	FBgn0259713	CG42367	FBgn0032495	CG16820	FBgn0261999	CG42817	FBgn0031550	Che-13
FBgn0031549	Spindly	FBgn0046776	CR14033	FBgn0014857	His3.3A	FBgn0017551	Rca1	FBgn0032150	CG13123	FBgn0002973	numb	FBgn0025700	CG5885	FBgn0032821	CdGAPr	FBgn0004858	elB	FBgn0032264	Lip4	FBgn0028540	CG9008	FBgn0032205	CG4957	FBgn0032151	nAcRalpha-30D	FBgn0032643	CG6453	FBgn0032820	fbp	FBgn0032774	CG17549	FBgn0033292	Cyp4ad1	FBgn0032400	CG6770	FBgn0051720	CG31720	FBgn0003255	rk	FBgn0262786	CG43167	FBgn0051712	CG31712	FBgn0051846		FBgn0020415	Idgf2	FBgn0259951	Sfp24Ba
FBgn0000721	for	FBgn0000228	Bsg25D	FBgn0262213	mir-2495	FBgn0086451	l(2)k09022	FBgn0032153	CG4537	FBgn0014179	gcm	FBgn0032163	TbCMF46	FBgn0260966		FBgn0028871	Cpr35B	FBgn0051871	CG31871	FBgn0027348	bgm	FBgn0027491	Cdk5alpha	FBgn0063449	Uhg2	FBgn0032644	CG5131	FBgn0014000	Hf	FBgn0032787	CG10195	FBgn0050359	Mal-A5	FBgn0032402	CG14945	FBgn0051717	CG31717	FBgn0001967	nimC3	FBgn0020309	crol	FBgn0027600	obst-B	FBgn0261855		FBgn0032587	CG5953	FBgn0259953	CG42463
FBgn0015376	cutlet	FBgn0031696	Bub1	FBgn0046776	CR14033	FBgn0031868	Rat1	FBgn0063391	snoRNA:U14:30Eb	FBgn0019809	gcm2	FBgn0259712	CG42366	FBgn0043021	snRNA:U5:38ABb	FBgn0260955	CG42587	FBgn0040496	CG17104	FBgn0028875	nAcRalpha-34E	FBgn0032218	CG5381	FBgn0025881	snoRNA:Me18S-A1576	FBgn0032668	CG17681	FBgn0083022	snoRNA:Psi18S-640e	FBgn0032809	CG13078	FBgn0033373	CG8080	FBgn0262353	CG43051	FBgn0032202	CG18619	FBgn0052971	CG32971	FBgn0042126	CG18788	FBgn0032192	CG5731	FBgn0028546	ics	FBgn0032593	trpgamma	FBgn0259952	Sfp24Bb
FBgn0031573	CG3407	FBgn0031698	Ncoa6	FBgn0003716	tkv	FBgn0028554	x16	FBgn0053300	Muc30E	FBgn0032138	CG4364	FBgn0032166	CG4619	FBgn0032825		FBgn0028879	CG15270	FBgn0027550	CG6495	FBgn0020258	ppk	FBgn0032221	CG5375	FBgn0010520	Bka	FBgn0032679	bsf	FBgn0083020	snoRNA:Psi18S-640g	FBgn0032824	CG13962	FBgn0050345	CG30345	FBgn0032445	CG6153	FBgn0032216	CG5384	FBgn0261566	CG42680	FBgn0032414	CG17211	FBgn0032210	CYLD	FBgn0004407	DNApol-gamma35	FBgn0000409	Cyt-c-p	FBgn0261054	Sfp24Bc
FBgn0051957	CG31957	FBgn0031711	CG6907	FBgn0261963	mid	FBgn0052829	CG32829	FBgn0024285	Srp54	FBgn0011291	Taf11	FBgn0011584	Trp1	FBgn0053117	Victoria	FBgn0062978	CG31808	FBgn0011676	Nos	FBgn0028855	CG15282	FBgn0019932	SamDC	FBgn0004867	RpS2	FBgn0032720	mRpL13	FBgn0032889	CG9331	FBgn0014000	Hf	FBgn0017558	Pdk	FBgn0032467	CG9934	FBgn0051715	CG31715	FBgn0032549	CG4650	FBgn0051861	CG31861	FBgn0032211	CG13138	FBgn0032535	Ance-2	FBgn0032603	CG17928	FBgn0051779	Acp24A4
FBgn0051961	CG31961	FBgn0014189	Hel25E	FBgn0031711	CG6907	FBgn0026196	nop5	FBgn0015664	Dref	FBgn0032149	CG4036	FBgn0032192	CG5731	FBgn0040995		FBgn0032598	ChLD3	FBgn0261871	dpr2	FBgn0085194	CG34165	FBgn0032235	CG5096	FBgn0032166	CG4619	FBgn0032729	CG10639	FBgn0051673	CG31673	FBgn0003141	pr	FBgn0033541	CG12934	FBgn0041720	snRNA:U2:34ABc	FBgn0032230	lft	FBgn0032551	CG18636	FBgn0041195	Pkd2	FBgn0032221	CG5375	FBgn0028938	CG16886	FBgn0040260	Ugt36Bc	FBgn0259954	CG42464
FBgn0031597	CG17612	FBgn0031718	CG14014	FBgn0051989	Cap-D3	FBgn0004838	Hrb27C	FBgn0043456	CG4747	FBgn0032150	CG13123	FBgn0032193	CG5727	FBgn0032856	CG16798	FBgn0032601	yellow-b	FBgn0032322	CG16743	FBgn0028537	CG31775	FBgn0032243	Klp31E	FBgn0011272	RpL13	FBgn0051792	CG31792	FBgn0032904	Mtp	FBgn0262096		FBgn0033582	CG9084	FBgn0051728	CG31728	FBgn0032242	CG5355	FBgn0053310	CG33310	FBgn0032428	CG6405	FBgn0032230	lft	FBgn0261628	CG42711	FBgn0051781	CR31781	FBgn0259955	CG42465
FBgn0031598	CG3338	FBgn0031719	CG18269	FBgn0014189	Hel25E	FBgn0031872	ihog	FBgn0032193	CG5727	FBgn0032153	CG4537	FBgn0032196	CG5708	FBgn0262879	CG43234	FBgn0040262	Ugt36Ba	FBgn0015400	kek2	FBgn0259213	CG42313	FBgn0086347	Myo31DF	FBgn0032180	CG31714	FBgn0002031	l(2)37Cc	FBgn0053510	CG33510	FBgn0259998	CG17571	FBgn0050029	CR30029	FBgn0028539	CG31731	FBgn0032249	CG5337	FBgn0045842	yuri	FBgn0032429	CG5446	FBgn0032233	dpr19	FBgn0032538	CG16885	FBgn0032670	CG5783	FBgn0259956	Sfp24C1
FBgn0261976	Psf2	FBgn0024191	sip1	FBgn0002525	Lam	FBgn0031873	Gas41	FBgn0032196	CG5708	FBgn0063449	Uhg2	FBgn0032197	CG5694	FBgn0054007	CG34007	FBgn0032614	CG13284	FBgn0032422	atilla	FBgn0028949	CG15254	FBgn0011676	Nos	FBgn0032181	CG13133	FBgn0032790	CG10194	FBgn0051626	CG31626	FBgn0083038	snoRNA:Psi18S-525a	FBgn0085256	CG34227	FBgn0027844	CAH1	FBgn0032253	CG5322	FBgn0051780	CG31780	FBgn0032434	CG5421	FBgn0032260	CG13144	FBgn0028544	CG16884	FBgn0032673	CG7180	FBgn0259957	CG42467
FBgn0031600	CG3652	FBgn0031736	CG11030	FBgn0024191	sip1	FBgn0020616	SA	FBgn0032197	CG5694	FBgn0010520	Bka	FBgn0051720	CG31720	FBgn0250785	vari	FBgn0011274	Dif	FBgn0032435	Oatp33Eb	FBgn0028948	CG15253	FBgn0032304	CG17134	FBgn0262032	CG42843	FBgn0032799	CG10166	FBgn0042701	CR12628	FBgn0032881	CG9319	FBgn0010425	epsilonTry	FBgn0001961	Sop2	FBgn0032305	CG6700	FBgn0261924	CG42791	FBgn0032439	Ref2	FBgn0021953	Fatp	FBgn0003255	rk	FBgn0085370	Pde11	FBgn0262621	CG43145
FBgn0022153	l(2)k05819	FBgn0031739	CG14005	FBgn0031740	CG7239	FBgn0031874	CG13775	FBgn0000229	bsk	FBgn0004867	RpS2	FBgn0024248	chico	FBgn0023091	dimm	FBgn0015609	CadN	FBgn0032437	CR17024	FBgn0028863	CG4587	FBgn0261871	dpr2	FBgn0032184	CG13135	FBgn0032801	CG10165	FBgn0085229	CG34200	FBgn0032913	CG9259	FBgn0010359	gammaTry	FBgn0028920	CG8997	FBgn0027363	Stam	FBgn0261925	CG42792	FBgn0032455	CG5792	FBgn0085190	CG34161	FBgn0261582	CG42692	FBgn0032707	CG10348	FBgn0031574	CG3964
FBgn0027609	morgue	FBgn0001941	ifc	FBgn0001942	eIF-4a	FBgn0026170	smt3	FBgn0011305	Rsf1	FBgn0053300	Muc30E	FBgn0000229	bsk	FBgn0261802	CG42748	FBgn0032685	CG10211	FBgn0259176	bun	FBgn0028645	beat-Ib	FBgn0032322	CG16743	FBgn0005593	RpL7	FBgn0032820	fbp	FBgn0033061	CG14590	FBgn0032945	CG8665	FBgn0050031	CG30031	FBgn0028534	CG7916	FBgn0261983	l(2)gd1	FBgn0041183	TepI	FBgn0015399	kek1	FBgn0032289	CG6431	FBgn0028875	nAcRalpha-34E	FBgn0032772	CG17350	FBgn0031575	Cep97
FBgn0031604	Elp3	FBgn0031759	lid	FBgn0031764	CG9107	FBgn0016978	snRNP-U1-70K	FBgn0260749	Utx	FBgn0025700	CG5885	FBgn0010407	Ror	FBgn0263109	CG43366	FBgn0263079	CG43338	FBgn0262203	mir-967	FBgn0028644	beat-Ic	FBgn0032336	Ast-C	FBgn0032195	CG4908	FBgn0032849	mRpS18B	FBgn0033079	Fmo-2	FBgn0032981	CG3635	FBgn0050025	CG30025	FBgn0028533	CG7953	FBgn0010197	Gyc32E	FBgn0024734	PRL-1	FBgn0040506	ACXE	FBgn0032299	CG17127	FBgn0032546	pburs	FBgn0041789	Pax	FBgn0000256	capu
FBgn0025684	MFS18	FBgn0031764	CG9107	FBgn0085208	CG34179	FBgn0051908	CG31908	FBgn0032215	CG5385	FBgn0032163	TbCMF46	FBgn0026379	Pten	FBgn0033049	CG14471	FBgn0086909	CG31751	FBgn0032456	MRP	FBgn0020416	Idgf1	FBgn0040211	hgo	FBgn0032222	CG5037	FBgn0083029	snoRNA:Psi18S-525j	FBgn0010482	l(2)01289	FBgn0039970	CG17508	FBgn0010358	deltaTry	FBgn0019890	Smg5	FBgn0032350	CG6287	FBgn0032612	CG13282	FBgn0021796	Tor	FBgn0032330	Samuel	FBgn0003016	osp	FBgn0032783	CG10237	FBgn0051773	CG31773
FBgn0031606	CG15439	FBgn0031766	CG9117	FBgn0031768	CG12393	FBgn0031883	CG11266	FBgn0032240	CG17768	FBgn0259712	CG42366	FBgn0032209	Hand	FBgn0262867	Ptr	FBgn0045852	ham	FBgn0262160	CG9932	FBgn0020415	Idgf2	FBgn0010197	Gyc32E	FBgn0003942	RpS27A	FBgn0032889	CG9331	FBgn0042083	CG3267	FBgn0033065	Cyp6w1	FBgn0015001	iotaTry	FBgn0012037	Ance	FBgn0032358	Ppt2	FBgn0032638	CG6639	FBgn0032470	CG5142	FBgn0032337	Ast-CC	FBgn0250834	CG33308	FBgn0032797	CG10186	FBgn0031585	CG2955
FBgn0031608	CG15435	FBgn0051643	CG31643	FBgn0031769	CG9135	FBgn0010453	Wnt4	FBgn0025366	Ip259	FBgn0262428	mir-87	FBgn0027491	Cdk5alpha	FBgn0050446	Tdc2	FBgn0032719	CG17321	FBgn0003935	snRNA:U5:34A	FBgn0086038	snoRNA:Me28S-C1237	FBgn0015400	kek2	FBgn0032287	CG6415	FBgn0051673	CG31673	FBgn0000473	Cyp6a2	FBgn0085244	CG34215	FBgn0011987	tRNA:SeC	FBgn0028430	He	FBgn0263087	CG43355	FBgn0262356	CG43054	FBgn0004192	snRNA:U2:34ABb	FBgn0032338	CG16854	FBgn0053309	CG33309	FBgn0032833	CoIV	FBgn0031591	CG15425
FBgn0031609	CG15443	FBgn0085208	CG34179	FBgn0031781	Arc-p20	FBgn0004009	wg	FBgn0004915	TfIIB	FBgn0032168	CG13126	FBgn0032215	CG5385	FBgn0033115	Spn42De	FBgn0000075	amd	FBgn0032495	CG16820	FBgn0027779	VhaSFD	FBgn0032373	Vha100-5	FBgn0032298	CG6724	FBgn0051674	CG31674	FBgn0085244	CG34215	FBgn0033112	Spn42Db	FBgn0033624	CG12384	FBgn0028939	nimC2	FBgn0032400	CG6770	FBgn0032666	CG5758	FBgn0041720	snRNA:U2:34ABc	FBgn0032359	Osi21	FBgn0032553	CG4480	FBgn0032838		FBgn0028482	CG16857
FBgn0031610	CG15436	FBgn0031768	CG12393	FBgn0031782	WDR79	FBgn0031902	Wnt6	FBgn0032258	CG7456	FBgn0011272	RpL13	FBgn0032217	CG4972	FBgn0016032	lbm	FBgn0032798	CG10132	FBgn0051729	CG31729	FBgn0040260	Ugt36Bc	FBgn0259225	Pde1c	FBgn0011676	Nos	FBgn0053510	CG33510	FBgn0261856	CR42785	FBgn0042086	Tsp42Eb	FBgn0033659	Damm	FBgn0003255	rk	FBgn0032402	CG14945	FBgn0263049	CR43344	FBgn0051728	CG31728	FBgn0000287	salr	FBgn0028888	CG4168	FBgn0040995		FBgn0031596	CG15429
FBgn0031611	CG17840	FBgn0031773	Fbw5	FBgn0021873	Gef26	FBgn0031904	CG5149	FBgn0032264	Lip4	FBgn0011584	Trp1	FBgn0032223	GATAd	FBgn0027558	pgant3	FBgn0032825		FBgn0028546	ics	FBgn0051810	CG31810	FBgn0032381	Mal-B1	FBgn0032304	CG17134	FBgn0262116	CG40127	FBgn0024293	Spn43Ab	FBgn0033133	Tsp42Ek	FBgn0033679	CG8888	FBgn0028872	CG18095	FBgn0028425	JhI-21	FBgn0262463	mir-100	FBgn0032506	CG9395	FBgn0032362	spz4	FBgn0028862	dao	FBgn0015803	rtGEF	FBgn0027560	Tps1
FBgn0031633	CG2976	FBgn0031781	Arc-p20	FBgn0031822	CG9548	FBgn0028387	chm	FBgn0024740	Lip2	FBgn0032193	CG5727	FBgn0032225	CG5022	FBgn0028642		FBgn0083037	snoRNA:Psi18S-525b	FBgn0051814	CG31814	FBgn0053179	beat-IIIb	FBgn0010497	dmGlut	FBgn0004363	porin	FBgn0085229	CG34200	FBgn0033221	CG12825	FBgn0033137	Tsp42Ep	FBgn0040759	CG13177	FBgn0032549	CG4650	FBgn0032429	CG5446	FBgn0032682	CG10176	FBgn0032522	CG16848	FBgn0085191	CG34162	FBgn0028880	CG15256	FBgn0026756	Ugt37a1	FBgn0262357	CG43055
FBgn0031635	CG15626	FBgn0031782	WDR79	FBgn0051638	CG31638	FBgn0085403	Rapgap1	FBgn0032298	CG6724	FBgn0000229	bsk	FBgn0032236	mRpS7	FBgn0033142		FBgn0032860	CG15130	FBgn0028938	CG16886	FBgn0032627	beat-IIIa	FBgn0051760	CG31760	FBgn0261871	dpr2	FBgn0033038	CG7791	FBgn0013308	Odc2	FBgn0033139	Tsp42Er	FBgn0085261	CG34232	FBgn0028886	CG15279	FBgn0262353	CG43051	FBgn0085370	Pde11	FBgn0004407	DNApol-gamma35	FBgn0028412	Mst33A	FBgn0028370	kek3	FBgn0032857	CG10947	FBgn0085207	CG34178
FBgn0031640	CG11926	FBgn0031799	Pez	FBgn0000320	eya	FBgn0031947	CG7154	FBgn0032321	YL-1	FBgn0010407	Ror	FBgn0022268	KdelR	FBgn0003090	pk	FBgn0040998		FBgn0028544	CG16884	FBgn0261089	Sytalpha	FBgn0032433	Oatp33Ea	FBgn0015756	RpL9	FBgn0263109	CG43366	FBgn0028563	sut1	FBgn0015038	Cyp9b1	FBgn0025454	Cyp6g1	FBgn0040228	dyn-p25	FBgn0032445	CG6153	FBgn0032689	CG10413	FBgn0261514	nimA	FBgn0032369	CG6614	FBgn0028901	CG18109	FBgn0032911	tadr	FBgn0262358	CG43056
FBgn0000286	Cf2	FBgn0043854	slam	FBgn0031836	CG11050	FBgn0004177	mts	FBgn0032346	Csl4	FBgn0011305	Rsf1	FBgn0032256	RluA-2	FBgn0003174	pwn	FBgn0032895	CG9335	FBgn0027929	nimB1	FBgn0262018	CadN2	FBgn0032435	Oatp33Eb	FBgn0032329	Art8	FBgn0262736	Vha16-1	FBgn0086021	snoRNA:MeU6-C68	FBgn0015039	Cyp9b2	FBgn0050046	CG30046	FBgn0041713	yellow-c	FBgn0032467	CG9934	FBgn0032693	Cyp310a1	FBgn0261582	CG42692	FBgn0262786	CG43167	FBgn0051735	CG31735	FBgn0010100	Acon	FBgn0259958	Sfp24F
FBgn0031643	CG3008	FBgn0031822	CG9548	FBgn0017551	Rca1	FBgn0031961	CG7102	FBgn0259750		FBgn0032209	Hand	FBgn0032258	CG7456	FBgn0033166	Eaf	FBgn0051675	CG31675	FBgn0028542	nimB4	FBgn0032663	CG15153	FBgn0032437	CR17024	FBgn0032336	Ast-C	FBgn0026761	Trap1	FBgn0002534	Lcp3	FBgn0033170	sPLA2	FBgn0033717	CG8839	FBgn0001977	l(2)35Bg	FBgn0028932	CG16890	FBgn0032713	CG17323	FBgn0001967	nimC3	FBgn0032385	CG16964	FBgn0028857	CG12448	FBgn0058006	CG40006	FBgn0040705	CG15434
FBgn0041150	hoe1	FBgn0031836	CG11050	FBgn0086451	l(2)k09022	FBgn0261790	SmE	FBgn0261648	salm	FBgn0032225	CG5022	FBgn0051721	Trim9	FBgn0003460	so	FBgn0032914	CG14397	FBgn0259896	nimC1	FBgn0032665	CG15152	FBgn0032442	CG15485	FBgn0040211	hgo	FBgn0033079	Fmo-2	FBgn0002571	Mal-A3	FBgn0050495	CG30495	FBgn0053013	CR33013	FBgn0028947	CG11865	FBgn0028539	CG31731	FBgn0032726	CG10621	FBgn0052971	CG32971	FBgn0032406	CG14947	FBgn0028858	CG10839	FBgn0013348	TpnC41C	FBgn0083938	BG642163
FBgn0015000	betaggt-I	FBgn0051633	CG31633	FBgn0031868	Rat1	FBgn0031977	baf	FBgn0003313	sala	FBgn0032231	CG5056	FBgn0032297	CG17124	FBgn0040513	kappaB-Ras	FBgn0051626	CG31626	FBgn0028875	nAcRalpha-34E	FBgn0001301	kel	FBgn0032456	MRP	FBgn0263234	Phae1	FBgn0033085	CG15908	FBgn0082928	snoRNA:Me28S-G3255a	FBgn0033221	CG12825	FBgn0033777	CG17574	FBgn0028518	CG18480	FBgn0027844	CAH1	FBgn0032731	CG10641	FBgn0262354	CG43052	FBgn0032414	CG17211	FBgn0001991	Ca-alpha1D	FBgn0033027	TpnC4	FBgn0031617	CG15635
FBgn0031652	jet	FBgn0031848	CG11329	FBgn0028554	x16	FBgn0044323	Cka	FBgn0032361	CG6488	FBgn0032236	mRpS7	FBgn0027550	CG6495	FBgn0050502	fa2h	FBgn0023091	dimm	FBgn0028906	CG17341	FBgn0261804	CG42750	FBgn0020367		FBgn0263235	Phae2	FBgn0259977	Tdc1	FBgn0015037	Cyp4p1	FBgn0033222	CG12824	FBgn0033809	CG4630	FBgn0041183	TepI	FBgn0000153	b	FBgn0032734	CG15169	FBgn0261566	CG42680	FBgn0051861	CG31861	FBgn0028893	CG31819	FBgn0033054	CG14591	FBgn0031620	CG11929
FBgn0031655	Marcal1	FBgn0025777	homer	FBgn0052829	CG32829	FBgn0031981	CG7466	FBgn0032387	CG16965	FBgn0032240	CG17768	FBgn0053129	CG33129	FBgn0033199	CG17985	FBgn0050441	CG30441	FBgn0261534	l(2)34Fc	FBgn0032719	CG17321	FBgn0032498	CG6108	FBgn0051760	CG31760	FBgn0033096	ZIP1	FBgn0033397	Cyp4p3	FBgn0002531	Lcp1	FBgn0033821	CG10799	FBgn0028514	CG4793	FBgn0028533	CG7953	FBgn0032773	fon	FBgn0261571	CG42685	FBgn0032419	CG17217	FBgn0261999	CG42817	FBgn0085240	CG34211	FBgn0031626	CG15631
FBgn0083961	CG34125	FBgn0086451	l(2)k09022	FBgn0026196	nop5	FBgn0013531	MED20	FBgn0085192	CG34163	FBgn0003942	RpS27A	FBgn0259750		FBgn0033271	CG8708	FBgn0033033	scaf	FBgn0020258	ppk	FBgn0051792	CG31792	FBgn0026760	Tehao	FBgn0032430	CG6388	FBgn0042083	CG3267	FBgn0027580	CG1516	FBgn0002533	Lcp2	FBgn0033826	CG4734	FBgn0028515	EndoGI	FBgn0019890	Smg5	FBgn0016675	Lectin-galC1	FBgn0032549	CG4650	FBgn0263088	CR43356	FBgn0028899	CG31817	FBgn0010482	l(2)01289	FBgn0260428	CG42523
FBgn0262467	Scox	FBgn0031868	Rat1	FBgn0004838	Hrb27C	FBgn0010287	Trf	FBgn0032390	dgt2	FBgn0025366	Ip259	FBgn0261648	salm	FBgn0033275	CG14756	FBgn0033049	CG14471	FBgn0004858	elB	FBgn0032774	CG17549	FBgn0028546	ics	FBgn0032442	CG15485	FBgn0033100	CG3420	FBgn0033465	CG12140	FBgn0002534	Lcp3	FBgn0083006	snoRNA:Psi28S-1153	FBgn0000339	cni	FBgn0012037	Ance	FBgn0032783	CG10237	FBgn0032551	CG18636	FBgn0041195	Pkd2	FBgn0032585	CG4580	FBgn0028579	phtf	FBgn0031644	CG15625
FBgn0010607	l(2)05714	FBgn0011737	wee	FBgn0031872	ihog	FBgn0020240	Mcr	FBgn0032404	RpL7-like	FBgn0262601	SmB	FBgn0003313	sala	FBgn0033359	CG8213	FBgn0262867	Ptr	FBgn0028871	Cpr35B	FBgn0041789	Pax	FBgn0051814	CG31814	FBgn0032449	CG17036	FBgn0000473	Cyp6a2	FBgn0263260	sel	FBgn0002535	Lcp4	FBgn0033926	Arc1	FBgn0051812	CG31812	FBgn0028939	nimC2	FBgn0032785	CG10026	FBgn0053309	CG33309	FBgn0032439	Ref2	FBgn0032593	trpgamma	FBgn0014028	SdhB	FBgn0083960	CG34124
FBgn0031659	CG14043	FBgn0028554	x16	FBgn0031873	Gas41	FBgn0031993	Piezo	FBgn0085193	CG34164	FBgn0022268	KdelR	FBgn0032361	CG6488	FBgn0085379	CG34350	FBgn0050446	Tdc2	FBgn0260955	CG42587	FBgn0032810	CG13077	FBgn0028540	CG9008	FBgn0020367		FBgn0033162	CG1707	FBgn0033480	mRpL42	FBgn0033292	Cyp4ad1	FBgn0262881	CG43236	FBgn0032596	CG17331	FBgn0003255	rk	FBgn0000529	bsh	FBgn0028887	CG3491	FBgn0040508	ACXC	FBgn0032601	yellow-b	FBgn0033109	coro	FBgn0260470	SP555
FBgn0031661	Gmd	FBgn0052829	CG32829	FBgn0020616	SA	FBgn0003607	Su(var)205	FBgn0032408	CG6712	FBgn0004915	TfIIB	FBgn0020309	crol	FBgn0033362	CG8172	FBgn0029508	Tsp42Ea	FBgn0259213	CG42313	FBgn0260000	CG17570	FBgn0259896	nimC1	FBgn0032498	CG6108	FBgn0050495	CG30495	FBgn0033494	KCNQ	FBgn0014469	Cyp4e2	FBgn0034005	alphaPS4	FBgn0032601	yellow-b	FBgn0028872	CG18095	FBgn0044811	TotF	FBgn0053310	CG33310	FBgn0040509	ACXB	FBgn0086673	CG13272	FBgn0033132	Tsp42Ej	FBgn0031684	CG8680
FBgn0031663	CG8891	FBgn0004838	Hrb27C	FBgn0031874	CG13775	FBgn0015299	Ssb-c31a	FBgn0028707	Mt2	FBgn0032258	CG7456	FBgn0032398	CG6766	FBgn0033365	CG8170	FBgn0029506	Tsp42Ee	FBgn0260446	GABA-B-R1	FBgn0032889	CG9331	FBgn0027348	bgm	FBgn0032504		FBgn0033208	mRpL52	FBgn0033541	CG12934	FBgn0033294	Mal-A4	FBgn0262965	CR43276	FBgn0032615	CG6012	FBgn0016930	smi35A	FBgn0020303		FBgn0028888	CG4168	FBgn0032462	CG16800	FBgn0032612	CG13282	FBgn0015038	Cyp9b1	FBgn0031690	CG7742
FBgn0031664	CG8892	FBgn0031871	CG10158	FBgn0031875	CG3430	FBgn0261020	wol	FBgn0032409	Ced-12	FBgn0051721	Trim9	FBgn0032399	CG6785	FBgn0033367	PO45	FBgn0033134	Tsp42El	FBgn0028862	dao	FBgn0051674	CG31674	FBgn0028875	nAcRalpha-34E	FBgn0032518	RpL24	FBgn0013308	Odc2	FBgn0050016	CG30016	FBgn0050359	Mal-A5	FBgn0260429	CG42524	FBgn0040985	CG6115	FBgn0032549	CG4650	FBgn0051683	CG31683	FBgn0262875	CG43230	FBgn0051728	CG31728	FBgn0032624	CG6304	FBgn0024293	Spn43Ab	FBgn0250847	CG14034
FBgn0083962	CG34126	FBgn0031873	Gas41	FBgn0031876	Atac1	FBgn0032016	CG7818	FBgn0032420	CG6583	FBgn0024740	Lip2	FBgn0015797	Rab6	FBgn0033408	CG8800	FBgn0016032	lbm	FBgn0028370	kek3	FBgn0032891	Oseg5	FBgn0020258	ppk	FBgn0026760	Tehao	FBgn0050373	CG30373	FBgn0061356	CG18003	FBgn0033302	Cyp6a14	FBgn0050091	CG30091	FBgn0261671	tweek	FBgn0041713	yellow-c	FBgn0042175	CG18858	FBgn0041103	nht	FBgn0051851	CG31851	FBgn0051784	CG31784	FBgn0044011	Spn43Ad	FBgn0031694	Cyp4ac2
FBgn0031676	CG14040	FBgn0031876	Atac1	FBgn0031878	sip2	FBgn0032030	Wdr82	FBgn0032421	crok	FBgn0032292	CG6750	FBgn0032414	CG17211	FBgn0033412	CG13955	FBgn0027558	pgant3	FBgn0028863	CG4587	FBgn0032895	CG9335	FBgn0028855	CG15282	FBgn0027348	bgm	FBgn0050360	Mal-A6	FBgn0033573	Obp47a	FBgn0001285	Jon44E	FBgn0053460	CG33460	FBgn0026150	ApepP	FBgn0001977	l(2)35Bg	FBgn0032900	CG14401	FBgn0028901	CG18109	FBgn0040973	CG16824	FBgn0083942	CG34106	FBgn0002930	nec	FBgn0015031	cype
FBgn0031677	CG14036	FBgn0026170	smt3	FBgn0026170	smt3	FBgn0032036	CG13384	FBgn0040286	SC35	FBgn0027550	CG6495	FBgn0032420	CG6583	FBgn0025286	RpL31	FBgn0033158	CG12164	FBgn0028644	beat-Ic	FBgn0032897	CG9336	FBgn0085194	CG34165	FBgn0028875	nAcRalpha-34E	FBgn0033297	Mal-A8	FBgn0050489	Cyp12d1-p	FBgn0033367	PO45	FBgn0053461	CG33461	FBgn0032639	CG18563	FBgn0028947	CG11865	FBgn0083972	CG34136	FBgn0262150	CG42876	FBgn0032506	CG9395	FBgn0032632	CG6380	FBgn0033153	Gadd45	FBgn0262097	CG42850
FBgn0028694	Rpn11	FBgn0016978	snRNP-U1-70K	FBgn0016978	snRNP-U1-70K	FBgn0001084	fy	FBgn0032446	CG5780	FBgn0053129	CG33129	FBgn0262475	bru-2	FBgn0033481	CG12920	FBgn0050502	fa2h	FBgn0020415	Idgf2	FBgn0032899	CG9338	FBgn0259213	CG42313	FBgn0261535	l(2)34Fd	FBgn0263120	Acsl	FBgn0053503	Cyp12d1-d	FBgn0033397	Cyp4p3	FBgn0053465	CG33465	FBgn0032642	CG5110	FBgn0028518	CG18480	FBgn0032922	CG9249	FBgn0028900	CG18518	FBgn0032522	CG16848	FBgn0051804	CG31804	FBgn0033170	sPLA2	FBgn0031720	CG14013
FBgn0031682	CG5828	FBgn0051908	CG31908	FBgn0051908	CG31908	FBgn0027932	Akap200	FBgn0021796	Tor	FBgn0041781	SCAR	FBgn0021796	Tor	FBgn0033497	CG12912	FBgn0033194	Vps13	FBgn0086038	snoRNA:Me28S-C1237	FBgn0051675	CG31675	FBgn0260446	GABA-B-R1	FBgn0020258	ppk	FBgn0001285	Jon44E	FBgn0040764	CG13230	FBgn0033423	CG1809	FBgn0034052	CG8299	FBgn0032652	CG6870	FBgn0041183	TepI	FBgn0032923	CG9248	FBgn0261925	CG42792	FBgn0261992	CG42810	FBgn0032644	CG5131	FBgn0033188	CG1600	FBgn0031721	CG14017
FBgn0046776	CR14033	FBgn0031883	CG11266	FBgn0031883	CG11266	FBgn0027490	D12	FBgn0032479	CG16974	FBgn0015756	RpL9	FBgn0032470	CG5142	FBgn0033502	CG12910	FBgn0033214	CG1941	FBgn0062978	CG31808	FBgn0032908	CG9270	FBgn0028949	CG15254	FBgn0259213	CG42313	FBgn0043576	PGRP-SC1a	FBgn0033588	CG13228	FBgn0050339	CG30339	FBgn0034063	CG8389	FBgn0032684	CG10178	FBgn0024734	PRL-1	FBgn0000099	ap	FBgn0028856	CG18063	FBgn0051814	CG31814	FBgn0032652	CG6870	FBgn0033196	CG1358	FBgn0041719	snRNA:U4:25F
FBgn0031696	Bub1	FBgn0262872	milt	FBgn0031886	Nuf2	FBgn0262029	d	FBgn0032509	CG6523	FBgn0032346	Csl4	FBgn0051855	CG31855	FBgn0026403	Ndg	FBgn0040780	CG12821	FBgn0032601	yellow-b	FBgn0032940	Mio	FBgn0028948	CG15253	FBgn0024183	vig	FBgn0033327	PGRP-SC1b	FBgn0033589	CG13227	FBgn0033451	CG1665	FBgn0034110	Atg9	FBgn0032689	CG10413	FBgn0011708	Syx5	FBgn0033049	CG14471	FBgn0005677	dac	FBgn0004407	DNApol-gamma35	FBgn0262356	CG43054	FBgn0001091	Gapdh1	FBgn0031722	CG14011
FBgn0031698	Ncoa6	FBgn0031886	Nuf2	FBgn0031897	CG13784	FBgn0032050	CG13096	FBgn0051855	CG31855	FBgn0259750		FBgn0032524	CG9267	FBgn0033524	Cyp49a1	FBgn0033252	CG12769	FBgn0086783		FBgn0041244		FBgn0028863	CG4587	FBgn0028516	ZnT35C	FBgn0033351	CG8235	FBgn0033594	CG13226	FBgn0033541	CG12934	FBgn0262816	CG43187	FBgn0051789	CG31789	FBgn0000339	cni	FBgn0033051	dream	FBgn0032585	CG4580	FBgn0261582	CG42692	FBgn0051788	CG31788	FBgn0042173	CG18853	FBgn0031723	CG7251
FBgn0031710	CG7371	FBgn0031893	CG4495	FBgn0004009	wg	FBgn0032052	CG13089	FBgn0032512	CG9305	FBgn0003313	sala	FBgn0053640	CG33640	FBgn0033578	BBS4	FBgn0033257	CG8713	FBgn0040262	Ugt36Ba	FBgn0033033	scaf	FBgn0028645	beat-Ib	FBgn0028863	CG4587	FBgn0033357	Tom7	FBgn0033598	Cpr47Eb	FBgn0033543	CG12338	FBgn0053459	CG33459	FBgn0032694	MESR3	FBgn0005677	dac	FBgn0033052	SCAP	FBgn0259735	CG42389	FBgn0001967	nimC3	FBgn0032680	Ntf-2r	FBgn0033229	CG12822	FBgn0031724	CG18266
FBgn0031711	CG6907	FBgn0031895	CG4497	FBgn0028387	chm	FBgn0011259	Sema-1a	FBgn0032514	CG9302	FBgn0032361	CG6488	FBgn0262194	mir-2489	FBgn0016047	nompA	FBgn0033307	CG14752	FBgn0032614	CG13284	FBgn0033058	CCHa2r	FBgn0028644	beat-Ic	FBgn0051821	CG31821	FBgn0033359	CG8213	FBgn0033600	Cpr47Ec	FBgn0050016	CG30016	FBgn0034139	CG4927	FBgn0086909	CG31751	FBgn0086038	snoRNA:Me28S-C1237	FBgn0033072	CG17994	FBgn0051807	CG31807	FBgn0028875	nAcRalpha-34E	FBgn0086681	Mst36Fa	FBgn0033249	CG11191	FBgn0031728	Hsp60C
FBgn0051989	Cap-D3	FBgn0031896	CG4502	FBgn0085403	Rapgap1	FBgn0029123	SoxN	FBgn0025724	beta'Cop	FBgn0085192	CG34163	FBgn0028527	CG18507	FBgn0021795	Tapdelta	FBgn0033362	CG8172	FBgn0032627	beat-IIIa	FBgn0262736	Vha16-1	FBgn0024734	PRL-1	FBgn0028645	beat-Ib	FBgn0085379	CG34350	FBgn0010423	TpnC47D	FBgn0050489	Cyp12d1-p	FBgn0034140	CG8317	FBgn0032704	Jwa	FBgn0262430	mir-9c	FBgn0028985	Spn4	FBgn0053552	CG33552	FBgn0052971	CG32971	FBgn0032707	CG10348	FBgn0085246	CG34217	FBgn0031729	CG12511
FBgn0051648	CG31648	FBgn0031909	CG5181	FBgn0031947	CG7154	FBgn0032078	C1GalTA	FBgn0032517	CG7099	FBgn0032407	Pex19	FBgn0028541	TM9SF4	FBgn0033645	CG13196	FBgn0033365	CG8170	FBgn0011274	Dif	FBgn0259977	Tdc1	FBgn0020416	Idgf1	FBgn0028644	beat-Ic	FBgn0082942	snoRNA:Me28S-A982b	FBgn0086519	Cpr47Eg	FBgn0053503	Cyp12d1-d	FBgn0000078	Amy-d	FBgn0260228	CG42502	FBgn0032596	CG17331	FBgn0028988	Spn1	FBgn0051812	CG31812	FBgn0262354	CG43052	FBgn0261806	CG42752	FBgn0033308	CG8736	FBgn0031733	CG14006
FBgn0031719	CG18269	FBgn0031945	CG7191	FBgn0004177	mts	FBgn0032079	CG31886	FBgn0032521	CG7110	FBgn0015797	Rab6	FBgn0028509	cenG1A	FBgn0033652	ths	FBgn0083977	CG34141	FBgn0262018	CadN2	FBgn0010482	l(2)01289	FBgn0020415	Idgf2	FBgn0027779	VhaSFD	FBgn0262515	VhaAC45	FBgn0033608	CG13220	FBgn0033582	CG9084	FBgn0034197	Cda9	FBgn0032713	CG17323	FBgn0032615	CG6012	FBgn0029507	Tsp42Ed	FBgn0051805	CG31805	FBgn0032546	pburs	FBgn0027074	CG17324	FBgn0033312	CG8642	FBgn0031734	CG11147
FBgn0024191	sip1	FBgn0031947	CG7154	FBgn0031961	CG7102	FBgn0032082	CG18088	FBgn0053640	CG33640	FBgn0032420	CG6583	FBgn0028519	CG4500	FBgn0033654	Sobp	FBgn0033405	CG13954	FBgn0032663	CG15153	FBgn0033101	CG9436	FBgn0027779	VhaSFD	FBgn0032595	CG17996	FBgn0033397	Cyp4p3	FBgn0259238	CG42336	FBgn0050029	CR30029	FBgn0034200	CG11395	FBgn0032727	CG10623	FBgn0261671	tweek	FBgn0029506	Tsp42Ee	FBgn0032627	beat-IIIa	FBgn0003016	osp	FBgn0032720	mRpL13	FBgn0033321	CG8738	FBgn0051913	CG31913
FBgn0031739	CG14005	FBgn0031951	r2d2	FBgn0261790	SmE	FBgn0032105	borr	FBgn0259984	kuz	FBgn0032421	crok	FBgn0028904	CG16879	FBgn0262423	mir-281-2	FBgn0033408	CG8800	FBgn0261804	CG42750	FBgn0028954	CG3287	FBgn0032602	CG13278	FBgn0000406	Cyt-b5-r	FBgn0010549	l(2)03659	FBgn0050022	CG30022	FBgn0085256	CG34227	FBgn0034219	mthl4	FBgn0032733	CG15170	FBgn0026150	ApepP	FBgn0053914	CG33914	FBgn0085198	CG34169	FBgn0261571	CG42685	FBgn0032744	Ttc19	FBgn0086784	stmA	FBgn0262999	CG43307
FBgn0031740	CG7239	FBgn0004177	mts	FBgn0031972	Wwox	FBgn0010314	Cks30A	FBgn0028541	TM9SF4	FBgn0032430	CG6388	FBgn0028906	CG17341	FBgn0033699	RpS11	FBgn0016078	wun	FBgn0263079	CG43338	FBgn0033107	koi	FBgn0040262	Ugt36Ba	FBgn0053179	beat-IIIb	FBgn0033423	CG1809	FBgn0054054	CG34054	FBgn0011554	etaTry	FBgn0028956	mthl3	FBgn0046302	CG10650	FBgn0032638	CG6639	FBgn0033137	Tsp42Ep	FBgn0032636	CG5043	FBgn0261567	CG42681	FBgn0032749	Phlpp	FBgn0027585	CG8740	FBgn0051644	CG31644
FBgn0001941	ifc	FBgn0261790	SmE	FBgn0031977	baf	FBgn0002973	numb	FBgn0012037	Ance	FBgn0040286	SC35	FBgn0263037	CG43332	FBgn0033702	CG8854	FBgn0033412	CG13955	FBgn0259201	CG42305	FBgn0033109	coro	FBgn0051810	CG31810	FBgn0032631	CG15140	FBgn0033428	Updo	FBgn0086658	snoRNA:Psi28S-1180	FBgn0011555	thetaTry	FBgn0034221	CG10764	FBgn0261396	Rpn3	FBgn0032639	CG18563	FBgn0002930	nec	FBgn0032638	CG6639	FBgn0032549	CG4650	FBgn0032798	CG10132	FBgn0011286	Rya-r44F	FBgn0259959	Sfp26Ac
FBgn0031759	lid	FBgn0031972	Wwox	FBgn0044323	Cka	FBgn0014179	gcm	FBgn0028519	CG4500	FBgn0032446	CG5780	FBgn0261563	wb	FBgn0033721	CG13159	FBgn0050338	CG30338	FBgn0032719	CG17321	FBgn0050158	CG30158	FBgn0053179	beat-IIIb	FBgn0262400	mir-287	FBgn0050338	CG30338	FBgn0085257	CG34228	FBgn0010425	epsilonTry	FBgn0034225	veil	FBgn0000422	Ddc	FBgn0032642	CG5110	FBgn0026602	Ady43A	FBgn0032649	CG15145	FBgn0053309	CG33309	FBgn0003931	snRNA:U4:38AB	FBgn0003074	Pgi	FBgn0262814	CG43185
FBgn0031766	CG9117	FBgn0010287	Trf	FBgn0031981	CG7466	FBgn0032138	CG4364	FBgn0260011	nimC4	FBgn0032470	CG5142	FBgn0261882	l(2)35Bc	FBgn0033739	Dyb	FBgn0033443	CG1698	FBgn0002023	Lim3	FBgn0029508	Tsp42Ea	FBgn0261815	CG42757	FBgn0262018	CadN2	FBgn0050339	CG30339	FBgn0010516	wal	FBgn0010359	gammaTry	FBgn0261501	CG42649	FBgn0024230	Hs2st	FBgn0032656	CG5674	FBgn0033153	Gadd45	FBgn0262356	CG43054	FBgn0032553	CG4480	FBgn0032850	Kua	FBgn0053199	CG33199	FBgn0002856	Acp26Ab
FBgn0051643	CG31643	FBgn0031990	CG8552	FBgn0013531	MED20	FBgn0022720	zf30C	FBgn0263037	CG43332	FBgn0032480	Edem2	FBgn0000317	ck	FBgn0033753	Cyp301a1	FBgn0033464	CG1441	FBgn0032798	CG10132	FBgn0042086	Tsp42Eb	FBgn0261089	Sytalpha	FBgn0261804	CG42750	FBgn0033448	hebe	FBgn0033703	CG13170	FBgn0050031	CG30031	FBgn0034288	CG5084	FBgn0032787	CG10195	FBgn0032663	CG15153	FBgn0263240	Coop	FBgn0262017	CG42830	FBgn0053310	CG33310	FBgn0040998		FBgn0033358	CG8216	FBgn0002855	Acp26Aa
FBgn0085208	CG34179	FBgn0263256	CG43394	FBgn0010287	Trf	FBgn0011291	Taf11	FBgn0261563	wb	FBgn0032499	Uvrag	FBgn0024183	vig	FBgn0008654	Su(z)2	FBgn0033501	CG12911	FBgn0260966		FBgn0261856	CR42785	FBgn0262018	CadN2	FBgn0261597	RpS26	FBgn0027580	CG1516	FBgn0263020	CG43315	FBgn0050025	CG30025	FBgn0034289	CG10910	FBgn0003923	snRNA:U2:38ABb	FBgn0032673	CG7180	FBgn0033188	CG1600	FBgn0032656	CG5674	FBgn0028888	CG4168	FBgn0262879	CG43234	FBgn0033368	CG13743	FBgn0031749	CG14000
FBgn0031768	CG12393	FBgn0031996	CG8460	FBgn0261830	CG42762	FBgn0032149	CG4036	FBgn0001970	Pgant35A	FBgn0032509	CG6523	FBgn0028879	CG15270	FBgn0033791	Drl-2	FBgn0033504	CAP	FBgn0032838		FBgn0050160	CG30160	FBgn0032665	CG15152	FBgn0032679	bsf	FBgn0033465	CG12140	FBgn0263021	CG43316	FBgn0010358	deltaTry	FBgn0034290	CG5773	FBgn0045064	bwa	FBgn0263049	CR43344	FBgn0004133	blow	FBgn0032658	CG5681	FBgn0041103	nht	FBgn0032867	CG15475	FBgn0027561	CG18659	FBgn0031751	CG9016
FBgn0031769	CG9135	FBgn0003607	Su(var)205	FBgn0031993	Piezo	FBgn0032150	CG13123	FBgn0005771	noc	FBgn0051855	CG31855	FBgn0028878	CG15269	FBgn0053007		FBgn0033508	Obp46a	FBgn0040995		FBgn0033124	Tsp42Ec	FBgn0001301	kel	FBgn0032701	CG10341	FBgn0027619	Adam	FBgn0053012	CG33012	FBgn0015001	iotaTry	FBgn0034291	CG5770	FBgn0083025	snoRNA:Psi18S-640b	FBgn0262456	mir-125	FBgn0033212	CG1399	FBgn0051742	CG31742	FBgn0259922	CG42448	FBgn0014859	Hr38	FBgn0028955	CG8788	FBgn0261055	Sfp26Ad
FBgn0031773	Fbw5	FBgn0032000	CG8372	FBgn0003607	Su(var)205	FBgn0032153	CG4537	FBgn0028926	NC2beta	FBgn0025724	beta'Cop	FBgn0001981	esg	FBgn0020391	Nrk	FBgn0026403	Ndg	FBgn0260000	CG17570	FBgn0033128	Tsp42Eg	FBgn0032670	CG5783	FBgn0259201	CG42305	FBgn0263260	sel	FBgn0033720	CG13160	FBgn0033624	CG12384	FBgn0034292	CG5767	FBgn0032864	CG2493	FBgn0032682	CG10176	FBgn0033215	CG1942	FBgn0032660	elfless	FBgn0028880	CG15256	FBgn0032879	CG9317	FBgn0033387	CG8008	FBgn0001128	Gpdh
FBgn0031776	CG13993	FBgn0003502	Btk29A	FBgn0261020	wol	FBgn0063391	snoRNA:U14:30Eb	FBgn0001981	esg	FBgn0032518	RpL24	FBgn0051823	CG31823	FBgn0033827	CG17047	FBgn0033524	Cyp49a1	FBgn0032860	CG15130	FBgn0033130	Tsp42Ei	FBgn0261804	CG42750	FBgn0032729	CG10639	FBgn0033481	CG12920	FBgn0033729	Cpr49Af	FBgn0050022	CG30022	FBgn0034356	CG10924	FBgn0032884	Pomp	FBgn0032684	CG10178	FBgn0033234	CG8791	FBgn0243486	rdo	FBgn0028370	kek3	FBgn0051676	CG31676	FBgn0002567	ltd	FBgn0031757	Ucp4C
FBgn0031779	CG9175	FBgn0261020	wol	FBgn0032016	CG7818	FBgn0025881	snoRNA:Me18S-A1576	FBgn0001983	wor	FBgn0032524	CG9267	FBgn0013433	beat-Ia	FBgn0033874	CG6347	FBgn0261862	whd	FBgn0011202	dia	FBgn0033134	Tsp42El	FBgn0032699	CG10383	FBgn0051792	CG31792	FBgn0033482	CG1371	FBgn0033730	Cpr49Ag	FBgn0033659	Damm	FBgn0004240	Dpt	FBgn0032935	CG8678	FBgn0085370	Pde11	FBgn0050380	CG30380	FBgn0032666	CG5758	FBgn0028901	CG18109	FBgn0032911	tadr	FBgn0017558	Pdk	FBgn0085209	CG34180
FBgn0031782	WDR79	FBgn0032014	CG7840	FBgn0261437	CSN8	FBgn0024285	Srp54	FBgn0001987	Gli	FBgn0028527	CG18507	FBgn0024734	PRL-1	FBgn0262739	AGO1	FBgn0005586	Rab3	FBgn0032895	CG9335	FBgn0033135	Tsp42En	FBgn0032719	CG17321	FBgn0086710	RpL30	FBgn0004907	14-3-3zeta	FBgn0033761	CG8778	FBgn0085261	CG34232	FBgn0034407	DptB	FBgn0261239	Hr39	FBgn0032689	CG10413	FBgn0050379	CG30379	FBgn0051785	CG31785	FBgn0262150	CG42876	FBgn0053509	CG33509	FBgn0259678	sqa	FBgn0031771	CG9140
FBgn0021873	Gef26	FBgn0032016	CG7818	FBgn0032030	Wdr82	FBgn0051712	CG31712	FBgn0028375	heix	FBgn0028541	TM9SF4	FBgn0040079	pkaap	FBgn0033887	St4	FBgn0033587	CG13218	FBgn0051675	CG31675	FBgn0033138	Tsp42Eq	FBgn0032729	CG10639	FBgn0002031	l(2)37Cc	FBgn0033524	Cyp49a1	FBgn0033787	CG13321	FBgn0050047	CG30047	FBgn0262569	CG43109	FBgn0000370	crc	FBgn0032694	MESR3	FBgn0033240	CG2906	FBgn0085200	CG34171	FBgn0028900	CG18518	FBgn0032914	CG14397	FBgn0033443	CG1698	FBgn0031774	CG9147
FBgn0031799	Pez	FBgn0261437	CSN8	FBgn0032034	Rcd4	FBgn0032169	CG4709	FBgn0015338	CG5861	FBgn0024846	p38b	FBgn0028375	heix	FBgn0033913	CG8468	FBgn0085252	CG34223	FBgn0032910	CG9265	FBgn0044011	Spn43Ad	FBgn0051792	CG31792	FBgn0086447	l(2)37Cg	FBgn0033541	CG12934	FBgn0033788	CG13323	FBgn0050043	CG30043	FBgn0034470	Obp56d	FBgn0032949	Lamp1	FBgn0086909	CG31751	FBgn0040778	CG17977	FBgn0032680	Ntf-2r	FBgn0261925	CG42792	FBgn0032922	CG9249	FBgn0022382	Pka-R2	FBgn0031784	CG9222
FBgn0263278	l(2)k11101	FBgn0260439	Pp2A-29B	FBgn0032035		FBgn0015664	Dref	FBgn0087041	CG42231	FBgn0004407	DNApol-gamma35	FBgn0051782		FBgn0085473	CG34444	FBgn0033590	CG13217	FBgn0051626	CG31626	FBgn0033170	sPLA2	FBgn0051793	CG31793	FBgn0032779	CG16771	FBgn0050018	mthl13	FBgn0033789	CG13324	FBgn0053012	CG33012	FBgn0050148	CG30148	FBgn0032955	CG2201	FBgn0032713	CG17323	FBgn0053087	LRP1	FBgn0263049	CR43344	FBgn0051735	CG31735	FBgn0263051	CG43346	FBgn0040773	CoVIIc	FBgn0031785	CG13991
FBgn0031815	frj	FBgn0032030	Wdr82	FBgn0032036	CG13384	FBgn0000180	bib	FBgn0028506	CG4455	FBgn0026373	RpII33	FBgn0062978	CG31808	FBgn0033943	CG12869	FBgn0033614	Obp47b	FBgn0032940	Mio	FBgn0050502	fa2h	FBgn0032772	CG17350	FBgn0032819	CG10463	FBgn0033547	CG12935	FBgn0002789	Mp20	FBgn0033720	CG13160	FBgn0043536	Obp57d	FBgn0262631	CR43148	FBgn0032727	CG10623	FBgn0050375	CG30375	FBgn0262463	mir-100	FBgn0028645	beat-Ib	FBgn0010100	Acon	FBgn0003071	Pfk	FBgn0051639	CG31639
FBgn0031818	CG9536	FBgn0032034	Rcd4	FBgn0041717	snRNA:U6atac:29B	FBgn0051875	CG31875	FBgn0025678	CaBP1	FBgn0028509	cenG1A	FBgn0051812	CG31812	FBgn0020269	mspo	FBgn0016047	nompA	FBgn0023091	dimm	FBgn0033192	Corin	FBgn0041789	Pax	FBgn0032820	fbp	FBgn0033573	Obp47a	FBgn0033879	CG6543	FBgn0033729	Cpr49Af	FBgn0034517	Cpr57A	FBgn0262886	CR43241	FBgn0032731	CG10641	FBgn0033307	CG14752	FBgn0032682	CG10176	FBgn0028857	CG12448	FBgn0026255	clumsy	FBgn0033520	Prx2540-1	FBgn0031786	CG13989
FBgn0031820	DLP	FBgn0041717	snRNA:U6atac:29B	FBgn0051898	CG31898	FBgn0043456	CG4747	FBgn0001185	her	FBgn0012037	Ance	FBgn0004797	mdy	FBgn0001319	kn	FBgn0033638	CG9005	FBgn0033033	scaf	FBgn0033204	CG2065	FBgn0032805	CG10337	FBgn0032849	mRpS18B	FBgn0040764	CG13230	FBgn0033904	CG18327	FBgn0033742	CG8550	FBgn0034543	CG30152	FBgn0032986	CG3262	FBgn0261396	Rpn3	FBgn0033308	CG8736	FBgn0032717	CG10600	FBgn0028856	CG18063	FBgn0000370	crc	FBgn0033521	CG12896	FBgn0260452	CG13984
FBgn0031822	CG9548	FBgn0051898	CG31898	FBgn0020497	emb	FBgn0000229	bsk	FBgn0032620	CG12288	FBgn0028519	CG4500	FBgn0051809	CG31809	FBgn0033973	HPS1	FBgn0033645	CG13196	FBgn0033058	CCHa2r	FBgn0033207	CG12826	FBgn0032810	CG13077	FBgn0011638	La	FBgn0085252	CG34223	FBgn0082930	snoRNA:Me28S-G2703b	FBgn0033777	CG17574	FBgn0065059	snoRNA:660	FBgn0250907	Cht3	FBgn0032770	CG13086	FBgn0033310	rgr	FBgn0051752	CG31752	FBgn0028858	CG10839	FBgn0261586	CG42696	FBgn0033538	CG11883	FBgn0015623	Cpr
FBgn0031834	CG13766	FBgn0020497	emb	FBgn0027490	D12	FBgn0011305	Rsf1	FBgn0027885	Aac11	FBgn0260011	nimC4	FBgn0032620	CG12288	FBgn0033983	CG10253	FBgn0033652	ths	FBgn0033072	CG17994	FBgn0033246	ACC	FBgn0032845	CG10747	FBgn0083022	snoRNA:Psi18S-640e	FBgn0033591	CG13216	FBgn0033949	CG10131	FBgn0033809	CG4630	FBgn0034583	CG10527	FBgn0262293	mir-2490	FBgn0032780	CG13085	FBgn0033313	Cirl	FBgn0032726	CG10621	FBgn0028884	CG4892	FBgn0032943	Tsp39D	FBgn0033558	CG12344	FBgn0259715	CG42369
FBgn0051635	CG31635	FBgn0043002	Chrac-14	FBgn0043002	Chrac-14	FBgn0004106	cdc2	FBgn0032651	Oli	FBgn0028906	CG17341	FBgn0032629	beat-IIIc	FBgn0015371	chn	FBgn0033658	TwdlBeta	FBgn0259977	Tdc1	FBgn0033269		FBgn0260000	CG17570	FBgn0083031	snoRNA:Psi18S-525h	FBgn0033598	Cpr47Eb	FBgn0033968	CG10200	FBgn0033821	CG10799	FBgn0034612	CG10505	FBgn0040005	CG17883	FBgn0032787	CG10195	FBgn0033321	CG8738	FBgn0032730	CG10431	FBgn0028893	CG31819	FBgn0023090	dtr	FBgn0033570	CG7712	FBgn0031817	CG9531
FBgn0031842	Tango1	FBgn0027780	U26	FBgn0032050	CG13096	FBgn0000413	da	FBgn0041184	Socs36E	FBgn0263037	CG43332	FBgn0262856	CG43220	FBgn0034012	Hr51	FBgn0033668	CG13188	FBgn0050446	Tdc2	FBgn0002571	Mal-A3	FBgn0026756	Ugt37a1	FBgn0032889	CG9331	FBgn0033601	Cpr47Ed	FBgn0016684	NaPi-T	FBgn0033826	CG4734	FBgn0082963	snoRNA:Psi28S-3378	FBgn0033010	Atf6	FBgn0003231	ref(2)P	FBgn0033355	CG13748	FBgn0032734	CG15169	FBgn0032582	CG13258	FBgn0032946	nrv3	FBgn0050021	metro	FBgn0031826	CG9550
FBgn0051633	CG31633	FBgn0029173	fu2	FBgn0032052	CG13089	FBgn0032240	CG17768	FBgn0032671	CG7200	FBgn0001970	Pgant35A	FBgn0003187	qua	FBgn0262565	CR43105	FBgn0033679	CG8888	FBgn0028954	CG3287	FBgn0050361	mtt	FBgn0083021	snoRNA:Psi18S-640f	FBgn0051674	CG31674	FBgn0033608	CG13220	FBgn0033981	Cyp6a21	FBgn0033906	CG8331	FBgn0050288	CG30288	FBgn0039969	Fis1	FBgn0032805	CG10337	FBgn0033366	Ance-4	FBgn0032741	Side	FBgn0001992	Cyp303a1	FBgn0023416	Ac3	FBgn0033602	Cpr47Ee	FBgn0031830	CoVb
FBgn0028467	CG11070	FBgn0032050	CG13096	FBgn0032054	CG13090	FBgn0025366	Ip259	FBgn0032683	kon	FBgn0005771	noc	FBgn0032651	Oli	FBgn0034022	CG12964	FBgn0262394	mir-281-1	FBgn0033107	koi	FBgn0033302	Cyp6a14	FBgn0032860	CG15130	FBgn0032891	Oseg5	FBgn0259238	CG42336	FBgn0013772	Cyp6a8	FBgn0053469	CG33469	FBgn0069056	CG33226	FBgn0000099	ap	FBgn0032838		FBgn0028955	CG8788	FBgn0032770	CG13086	FBgn0032585	CG4580	FBgn0032969	CG2528	FBgn0033631	Sod3	FBgn0085374	CG34345
FBgn0000392	cup	FBgn0032051	CG13097	FBgn0016122	Acer	FBgn0262601	SmB	FBgn0032688	CG15160	FBgn0028926	NC2beta	FBgn0015609	CadN	FBgn0024754	Flo-1	FBgn0033702	CG8854	FBgn0033109	coro	FBgn0259226	CG42326	FBgn0011202	dia	FBgn0040297	Nhe2	FBgn0011556	zetaTry	FBgn0262512	Vha14-1	FBgn0262881	CG43236	FBgn0053225	CG33225	FBgn0025693	CG11163	FBgn0045064	bwa	FBgn0033388	CG8046	FBgn0016675	Lectin-galC1	FBgn0259735	CG42389	FBgn0085202	CG34173	FBgn0033635	CG7777	FBgn0263200	Galt
FBgn0000351	cort	FBgn0032052	CG13089	FBgn0032059	PrBP	FBgn0032264	Lip4	FBgn0032691	Atac2	FBgn0261882	l(2)35Bc	FBgn0023096	btv	FBgn0262403	mir-278	FBgn0033721	CG13159	FBgn0050158	CG30158	FBgn0025709	CG8083	FBgn0032889	CG9331	FBgn0032919	CG9253	FBgn0011554	etaTry	FBgn0034045	CG8249	FBgn0015714	Cyp6a17	FBgn0034710	CG3292	FBgn0033050	Pngl	FBgn0020303		FBgn0033402	Myd88	FBgn0032785	CG10026	FBgn0032588	CG5968	FBgn0013348	TpnC41C	FBgn0050035	Tret1-1	FBgn0031849	CG11327
FBgn0031848	CG11329	FBgn0032054	CG13090	FBgn0261629	CG42712	FBgn0032293	Dpy-30L1	FBgn0032701	CG10341	FBgn0024183	vig	FBgn0032671	CG7200	FBgn0023441	fus	FBgn0262840	CG43204	FBgn0029508	Tsp42Ea	FBgn0262515	VhaAC45	FBgn0051674	CG31674	FBgn0063368	Gpb5	FBgn0011555	thetaTry	FBgn0020236	ATPCL	FBgn0033981	Cyp6a21	FBgn0034712	CG3264	FBgn0033051	dream	FBgn0083038	snoRNA:Psi18S-525a	FBgn0004360	Wnt2	FBgn0032813	CG10262	FBgn0032593	trpgamma	FBgn0259247	laccase2	FBgn0040491	Buffy	FBgn0031853	TTLL3B
FBgn0028703	Nhe3	FBgn0085470	CG34441	FBgn0029123	SoxN	FBgn0027868	Nup107	FBgn0003896	tup	FBgn0028878	CG15269	FBgn0000636	Fas3	FBgn0003425		FBgn0033739	Dyb	FBgn0050159	CG30159	FBgn0033395	Cyp4p2	FBgn0032891	Oseg5	FBgn0022288	l(2)09851	FBgn0010425	epsilonTry	FBgn0034131	CG15712	FBgn0262965	CR43276	FBgn0050277	Oatp58Da	FBgn0033093	CG3270	FBgn0083026	snoRNA:Psi18S-640a	FBgn0033438	Mmp2	FBgn0000464	Lar	FBgn0051807	CG31807	FBgn0033027	TpnC4	FBgn0026176	skpB	FBgn0051910	CG31910
FBgn0025777	homer	FBgn0032059	PrBP	FBgn0013746	alien	FBgn0032296	CG6729	FBgn0032724	CG10428	FBgn0001981	esg	FBgn0262463	mir-100	FBgn0034056	CG15699	FBgn0050053	CG30053	FBgn0033127	Tsp42Ef	FBgn0033402	Myd88	FBgn0032895	CG9335	FBgn0085229	CG34200	FBgn0021795	Tapdelta	FBgn0020506	Amyrel	FBgn0050091	CG30091	FBgn0034756	Cyp6d2	FBgn0033113	Spn42Dc	FBgn0083036	snoRNA:Psi18S-525c	FBgn0033439	CG1773	FBgn0032817	CG10631	FBgn0053552	CG33552	FBgn0033031	CG8245	FBgn0033685	CG13178	FBgn0031857	CG11321
FBgn0046704	Liprin-alpha	FBgn0029123	SoxN	FBgn0052982	CG32982	FBgn0032298	CG6724	FBgn0051800	CG31800	FBgn0001987	Gli	FBgn0032683	kon	FBgn0020236	ATPCL	FBgn0261545	CG42663	FBgn0033128	Tsp42Eg	FBgn0033405	CG13954	FBgn0032897	CG9336	FBgn0033058	CCHa2r	FBgn0015872	Drip	FBgn0085487	CG34458	FBgn0050082	CG30082	FBgn0050196	CG30196	FBgn0033133	Tsp42Ek	FBgn0083024	snoRNA:Psi18S-640c	FBgn0033440	CG10459	FBgn0000529	bsh	FBgn0032598	ChLD3	FBgn0085414	dpr12	FBgn0261611	CG42700	FBgn0031858	CG17378
FBgn0017551	Rca1	FBgn0013746	alien	FBgn0032105	borr	FBgn0024227	ial	FBgn0263198	Acn	FBgn0013433	beat-Ia	FBgn0032692	CG15161	FBgn0034072	Dg	FBgn0025692	CG3814	FBgn0033129	Tsp42Eh	FBgn0010549	l(2)03659	FBgn0032899	CG9338	FBgn0033060	CG7849	FBgn0086712	Egm	FBgn0013763	CG5210	FBgn0050090	CG30090	FBgn0263031	CG43326	FBgn0033137	Tsp42Ep	FBgn0083023	snoRNA:Psi18S-640d	FBgn0033443	CG1698	FBgn0032851	CG13970	FBgn0032602	CG13278	FBgn0085240	CG34211	FBgn0033710	CG17739	FBgn0042189	CG17376
FBgn0042092	CG13773	FBgn0032101	CG9586	FBgn0010314	Cks30A	FBgn0032321	YL-1	FBgn0032751	CG17343	FBgn0028375	heix	FBgn0032693	Cyp310a1	FBgn0083983	mRpL34	FBgn0033791	Drl-2	FBgn0033130	Tsp42Ei	FBgn0017558	Pdk	FBgn0051675	CG31675	FBgn0262736	Vha16-1	FBgn0085257	CG34228	FBgn0034160	CG5550	FBgn0053460	CG33460	FBgn0034758	CG13510	FBgn0033139	Tsp42Er	FBgn0083033	snoRNA:Psi18S-525f	FBgn0033450	Lsm11	FBgn0083972	CG34136	FBgn0086673	CG13272	FBgn0033061	CG14590	FBgn0033734	CG8520	FBgn0031859	CG17377
FBgn0011737	wee	FBgn0032105	borr	FBgn0032130	CG3838	FBgn0021761	Nup154	FBgn0086446	l(2)37Ce	FBgn0028894	CG5869	FBgn0086200	CG42490	FBgn0086676	spin	FBgn0033808	CG4627	FBgn0016032	lbm	FBgn0259246	brp	FBgn0032908	CG9270	FBgn0026761	Trap1	FBgn0033645	CG13196	FBgn0026754	Ugt37c1	FBgn0053461	CG33461	FBgn0262142	CG42868	FBgn0028687	Rpt1	FBgn0083032	snoRNA:Psi18S-525g	FBgn0033452	CG1599	FBgn0023388	Dap160	FBgn0085342	CG34313	FBgn0033085	CG15908	FBgn0050334	CG30334	FBgn0031860	CG11236
FBgn0004838	Hrb27C	FBgn0022720	zf30C	FBgn0014179	gcm	FBgn0032329	Art8	FBgn0086447	l(2)37Cg	FBgn0015338	CG5861	FBgn0045852	ham	FBgn0259718	CG42372	FBgn0033850	CG13331	FBgn0033135	Tsp42En	FBgn0033423	CG1809	FBgn0032910	CG9265	FBgn0033079	Fmo-2	FBgn0010516	wal	FBgn0026721	fat-spondin	FBgn0034052	CG8299	FBgn0034784	CG9826	FBgn0033207	CG12826	FBgn0032864	CG2493	FBgn0033463	CG1513	FBgn0032923	CG9248	FBgn0051805	CG31805	FBgn0033086	CG9410	FBgn0004435	Galpha49B	FBgn0031861	CG17375
FBgn0031871	CG10158	FBgn0011291	Taf11	FBgn0032138	CG4364	FBgn0032346	Csl4	FBgn0015380	drl	FBgn0000339	cni	FBgn0003896	tup	FBgn0010611	Hmgs	FBgn0000633	fas	FBgn0033136	Tsp42Eo	FBgn0050340	CG30340	FBgn0032940	Mio	FBgn0259977	Tdc1	FBgn0085261	CG34232	FBgn0034191	CG6984	FBgn0034063	CG8389	FBgn0263084	CG43352	FBgn0033212	CG1399	FBgn0032871	CG2611	FBgn0033476	oys	FBgn0032943	Tsp39D	FBgn0053179	beat-IIIb	FBgn0010482	l(2)01289	FBgn0050054	CG30054	FBgn0262877	CG43232
FBgn0020616	SA	FBgn0024285	Srp54	FBgn0022720	zf30C	FBgn0032348	CG4751	FBgn0024245	dnt	FBgn0001995	mRpL4	FBgn0051800	CG31800	FBgn0034131	CG15712	FBgn0033873	CG6337	FBgn0033138	Tsp42Eq	FBgn0050339	CG30339	FBgn0041244		FBgn0042083	CG3267	FBgn0262889	CG43244	FBgn0034197	Cda9	FBgn0001124	Got1	FBgn0034856	yellow-d2	FBgn0042135	CG18812	FBgn0051678	CG31678	FBgn0003660	Syb	FBgn0023090	dtr	FBgn0032624	CG6304	FBgn0050158	CG30158	FBgn0033769	CG8768	FBgn0262616	CR43142
FBgn0031875	CG3430	FBgn0051713	Apf	FBgn0032150	CG13123	FBgn0259750		FBgn0032793	CG10189	FBgn0025678	CaBP1	FBgn0002022	Catsup	FBgn0034142	CG8306	FBgn0033874	CG6347	FBgn0044011	Spn43Ad	FBgn0033437	CG12926	FBgn0032946	nrv3	FBgn0261856	CR42785	FBgn0050203	CG30203	FBgn0050458	CG30458	FBgn0028424	JhI-26	FBgn0050414	CG30414	FBgn0033222	CG12824	FBgn0032884	Pomp	FBgn0033520	Prx2540-1	FBgn0262620	CG43144	FBgn0032626	CG12620	FBgn0033131	CR12842	FBgn0011227	ox	FBgn0263026	CG43321
FBgn0021944	Coprox	FBgn0032169	CG4709	FBgn0085212	CG34183	FBgn0040232	cmet	FBgn0005672	spi	FBgn0028841	jhamt	FBgn0002023	Lim3	FBgn0034145	CG5065	FBgn0050069	CG30069	FBgn0033158	CG12164	FBgn0033448	hebe	FBgn0023416	Ac3	FBgn0033124	Tsp42Ec	FBgn0050047	CG30047	FBgn0050457	CG30457	FBgn0034110	Atg9	FBgn0011296	l(2)efl	FBgn0029093	cathD	FBgn0040297	Nhe2	FBgn0033521	CG12896	FBgn0032957	CG2225	FBgn0051784	CG31784	FBgn0033158	CG12164	FBgn0033778	CG3790	FBgn0051907	CG31907
FBgn0263027	CG43322	FBgn0015664	Dref	FBgn0032153	CG4537	FBgn0261648	salm	FBgn0032816	Nf-YB	FBgn0032597	CG17904	FBgn0015380	drl	FBgn0262432	mir-8	FBgn0033911	VGAT	FBgn0050502	fa2h	FBgn0050011	gem	FBgn0063368	Gpb5	FBgn0033138	Tsp42Eq	FBgn0050049	CG30049	FBgn0028956	mthl3	FBgn0053459	CG33459	FBgn0034997	CG3376	FBgn0050379	CG30379	FBgn0032935	CG8678	FBgn0053144	CG33144	FBgn0032967	CG1428	FBgn0032627	beat-IIIa	FBgn0050491	CG30491	FBgn0085468	CG34439	FBgn0002938	ninaC
FBgn0051908	CG31908	FBgn0000180	bib	FBgn0032157	Etl1	FBgn0003313	sala	FBgn0032821	CdGAPr	FBgn0261068	LSm7	FBgn0032799	CG10166	FBgn0026721	fat-spondin	FBgn0033913	CG8468	FBgn0033194	Vps13	FBgn0033494	KCNQ	FBgn0262116	CG40127	FBgn0050503	CG30503	FBgn0033720	CG13160	FBgn0260763	CG42561	FBgn0034140	CG8317	FBgn0034999	CG3394	FBgn0040778	CG17977	FBgn0003930	snRNA:U4:39B	FBgn0033574	Spn47C	FBgn0051600	CG31600	FBgn0083942	CG34106	FBgn0033208	mRpL52	FBgn0033807	AQP	FBgn0031905	CG5155
FBgn0031882	Rab30	FBgn0051875	CG31875	FBgn0024285	Srp54	FBgn0032361	CG6488	FBgn0032822	CG10466	FBgn0004797	mdy	FBgn0032803	CG13082	FBgn0261642	mbl	FBgn0085214	CG34185	FBgn0033214	CG1941	FBgn0033502	CG12910	FBgn0033033	scaf	FBgn0025885	Inos	FBgn0033732	CG13157	FBgn0260764	CG42562	FBgn0013763	CG5210	FBgn0035040	CG4741	FBgn0033259	CG11210	FBgn0000370	crc	FBgn0262817	CG43188	FBgn0028979	tio	FBgn0261815	CG42757	FBgn0050380	CG30380	FBgn0033817	CG4688	FBgn0262453	mir-275
FBgn0262872	milt	FBgn0051755	SoYb	FBgn0051713	Apf	FBgn0086036	snoRNA:Me18S-A934	FBgn0260966		FBgn0051809	CG31809	FBgn0032815	CG10462	FBgn0263197	Patronin	FBgn0033942	Cpr51A	FBgn0033252	CG12769	FBgn0033504	CAP	FBgn0085414	dpr12	FBgn0033192	Corin	FBgn0033761	CG8778	FBgn0034276	CG6385	FBgn0000078	Amy-d	FBgn0015801	Reg-5	FBgn0033261	CG18316	FBgn0032986	CG3262	FBgn0033602	Cpr47Ee	FBgn0261802	CG42748	FBgn0085198	CG34169	FBgn0033268	Obp44a	FBgn0002789	Mp20	FBgn0031912	CG5261
FBgn0031885	Mnn1	FBgn0043456	CG4747	FBgn0032169	CG4709	FBgn0032388	CG6686	FBgn0043022	snRNA:U5:38ABa	FBgn0032620	CG12288	FBgn0032821	CdGAPr	FBgn0085223	CG34194	FBgn0010397	LamC	FBgn0033257	CG8713	FBgn0053474	CG33474	FBgn0033048	CG7881	FBgn0033207	CG12826	FBgn0026741	mRpL18	FBgn0034288	CG5084	FBgn0034197	Cda9	FBgn0035090	CG2736	FBgn0033289	CG2121	FBgn0250907	Cht3	FBgn0033627	CG13204	FBgn0259683	Ir40a	FBgn0051804	CG31804	FBgn0033274	CG14757	FBgn0259219	CG42319	FBgn0031920	CG6441
FBgn0031886	Nuf2	FBgn0032189	Ripalpha	FBgn0015664	Dref	FBgn0032390	dgt2	FBgn0032847	Taf13	FBgn0032629	beat-IIIc	FBgn0260966		FBgn0034253	CG10936	FBgn0033943	CG12869	FBgn0050371	CG30371	FBgn0001122	G-oalpha47A	FBgn0033058	CCHa2r	FBgn0033208	mRpL52	FBgn0025692	CG3814	FBgn0034289	CG10910	FBgn0034200	CG11395	FBgn0085582	CG41257	FBgn0002531	Lcp1	FBgn0040005	CG17883	FBgn0050026	CG30026	FBgn0262947	CG43266	FBgn0051803	CG31803	FBgn0015034	Cyp4e1	FBgn0050062	CG30062	FBgn0083141	Spn7
FBgn0031893	CG4495	FBgn0085188	CG34159	FBgn0000180	bib	FBgn0032404	RpL7-like	FBgn0011638	La	FBgn0032640	Sgt	FBgn0032825		FBgn0063385	snoRNA:Me28S-A3407a	FBgn0082926	snoRNA:Me28S-U1848	FBgn0033289	CG2121	FBgn0033538	CG11883	FBgn0262736	Vha16-1	FBgn0033214	CG1941	FBgn0033787	CG13321	FBgn0064237	Idgf5	FBgn0262563	CG43103	FBgn0002564	Lsp1gamma	FBgn0050359	Mal-A5	FBgn0033010	Atf6	FBgn0033639	CG9003	FBgn0250907	Cht3	FBgn0032636	CG5043	FBgn0033308	CG8736	FBgn0261990	CG42808	FBgn0031925	Cyp4d21
FBgn0031895	CG4497	FBgn0250843	Pros35	FBgn0051875	CG31875	FBgn0085193	CG34164	FBgn0262455	mir-1	FBgn0032642	CG5110	FBgn0053117	Victoria	FBgn0261362	proPO-A1	FBgn0020269	mspo	FBgn0002571	Mal-A3	FBgn0005586	Rab3	FBgn0259977	Tdc1	FBgn0013307	Odc1	FBgn0033788	CG13323	FBgn0063499	GstE10	FBgn0065048	snoRNA:U3:54Aa	FBgn0063924	Kaz1-ORFA	FBgn0033301	CG12780	FBgn0039969	Fis1	FBgn0040491	Buffy	FBgn0262887	CR43242	FBgn0003187	qua	FBgn0011286	Rya-r44F	FBgn0033869	Cpr50Cb	FBgn0024290
FBgn0031896	CG4502	FBgn0032196	CG5708	FBgn0043456	CG4747	FBgn0032408	CG6712	FBgn0259936	Uhg3	FBgn0032651	Oli	FBgn0032838		FBgn0034301	CG5756	FBgn0001319	kn	FBgn0050361	mtt	FBgn0027525	CG7686	FBgn0010482	l(2)01289	FBgn0013308	Odc2	FBgn0033789	CG13324	FBgn0034335	GstE1	FBgn0034219	mthl4	FBgn0262035	CG42846	FBgn0033310	rgr	FBgn0000099	ap	FBgn0033667	CG13183	FBgn0260798	Gprk1	FBgn0032647	CG15143	FBgn0033347	CG8248	FBgn0033872	CG6329	FBgn0031934	Ntl
FBgn0028387	chm	FBgn0032198	eEF1delta	FBgn0085188	CG34159	FBgn0028707	Mt2	FBgn0032877	CG2617	FBgn0000636	Fas3	FBgn0262096		FBgn0083054	snoRNA:Psi18S-1347a	FBgn0033978	Cyp6a23	FBgn0259226	CG42326	FBgn0033579	CG13229	FBgn0028954	CG3287	FBgn0028563	sut1	FBgn0027079	Aats-val	FBgn0063495	GstE5	FBgn0028956	mthl3	FBgn0035146	CG13893	FBgn0040777	CG14767	FBgn0025693	CG11163	FBgn0033724	CG8501	FBgn0262970	CR43281	FBgn0032648	CG15144	FBgn0033358	CG8216	FBgn0033876	synaptogyrin	FBgn0053296	CG33296
FBgn0031947	CG7154	FBgn0260749	Utx	FBgn0032197	CG5694	FBgn0032409	Ced-12	FBgn0032880	CG9318	FBgn0261597	RpS26	FBgn0086040	snoRNA:Me28S-A3365	FBgn0083053	snoRNA:Psi18S-1347b	FBgn0085216	CG34187	FBgn0033307	CG14752	FBgn0003396	shn	FBgn0033107	koi	FBgn0028562	sut2	FBgn0033816	CG4679	FBgn0063494	GstE6	FBgn0034229	CG4847	FBgn0016715	Reg-2	FBgn0033340	CG13751	FBgn0033050	Pngl	FBgn0033750	CG13151	FBgn0000099	ap	FBgn0032649	CG15145	FBgn0033381	CG11784	FBgn0033880	CG6553	FBgn0031935	CG13793
FBgn0031951	r2d2	FBgn0005322	nmd	FBgn0032200	CG5676	FBgn0040286	SC35	FBgn0250867	CG42238	FBgn0262456	mir-125	FBgn0032856	CG16798	FBgn0086600	snoRNA:Psi18S-1347c	FBgn0034012	Hr51	FBgn0027585	CG8740	FBgn0033589	CG13227	FBgn0033109	coro	FBgn0050373	CG30373	FBgn0033827	CG17047	FBgn0034356	CG10924	FBgn0260764	CG42562	FBgn0035154	CG3344	FBgn0033373	CG8080	FBgn0000043	Act42A	FBgn0033755	ClC-b	FBgn0085414	dpr12	FBgn0262356	CG43054	FBgn0083977	CG34141	FBgn0013733	shot	FBgn0031936	CG13794
FBgn0027515	CG7115	FBgn0003087	pim	FBgn0026379	Pten	FBgn0085424	nub	FBgn0032915	CG12050	FBgn0032692	CG15161	FBgn0083026	snoRNA:Psi18S-640a	FBgn0027835	Dp1	FBgn0262565	CR43105	FBgn0011746	ana	FBgn0010423	TpnC47D	FBgn0050158	CG30158	FBgn0002571	Mal-A3	FBgn0033830	CG10814	FBgn0000566	Eip55E	FBgn0034276	CG6385	FBgn0004430	LysS	FBgn0086656	shrb	FBgn0033051	dream	FBgn0033756	CG17760	FBgn0000546	EcR	FBgn0262876	CG43231	FBgn0033403	CG13739	FBgn0033919	CG8547	FBgn0260479	CG31904
FBgn0261790	SmE	FBgn0032234	gny	FBgn0011305	Rsf1	FBgn0004394	pdm2	FBgn0032919	CG9253	FBgn0032700	CG10338	FBgn0083037	snoRNA:Psi18S-525b	FBgn0034345	CG5174	FBgn0034022	CG12964	FBgn0010114	hig	FBgn0086519	Cpr47Eg	FBgn0029508	Tsp42Ea	FBgn0033294	Mal-A4	FBgn0024556	EfTuM	FBgn0034390	CG15093	FBgn0261362	proPO-A1	FBgn0035251	CG7967	FBgn0050344	CG30344	FBgn0014009	Rab2	FBgn0033763	CG8646	FBgn0085421	Epac	FBgn0262018	CadN2	FBgn0033422	Or45b	FBgn0028428		FBgn0014454	Acp1
FBgn0031969	pes	FBgn0004106	cdc2	FBgn0260749	Utx	FBgn0032452	CG15484	FBgn0024371	E2f2	FBgn0045852	ham	FBgn0083036	snoRNA:Psi18S-525c	FBgn0034354	CG5224	FBgn0034025	GalNAc-T1	FBgn0083977	CG34141	FBgn0043470	lambdaTry	FBgn0033124	Tsp42Ec	FBgn0050361	mtt	FBgn0033873	CG6337	FBgn0010053	Jheh1	FBgn0034288	CG5084	FBgn0035300	CG1139	FBgn0050345	CG30345	FBgn0028985	Spn4	FBgn0026619	Taz	FBgn0033108	CG15236	FBgn0262017	CG42830	FBgn0033426	CG1814	FBgn0033935	Sin1	FBgn0031941	CG7211
FBgn0031972	Wwox	FBgn0051716	Cnot4	FBgn0051715	CG31715	FBgn0032454	CG5787	FBgn0032921	Mpp6	FBgn0032713	CG17323	FBgn0083034	snoRNA:Psi18S-525e	FBgn0050115	GEFmeso	FBgn0034030	CG8192	FBgn0033405	CG13954	FBgn0011556	zetaTry	FBgn0033128	Tsp42Eg	FBgn0033317	CG8635	FBgn0033879	CG6543	FBgn0034426	CG10476	FBgn0034289	CG10910	FBgn0035311	CR15821	FBgn0016078	wun	FBgn0033133	Tsp42Ek	FBgn0033775	Cyp9h1	FBgn0028988	Spn1	FBgn0032658	CG5681	FBgn0022382	Pka-R2	FBgn0033936	CG17386	FBgn0031942	CG7203
FBgn0013531	MED20	FBgn0032242	CG5355	FBgn0003087	pim	FBgn0021796	Tor	FBgn0262631	CR43148	FBgn0003896	tup	FBgn0083023	snoRNA:Psi18S-640d	FBgn0034362	CG5323	FBgn0034053	Cyp4aa1	FBgn0033412	CG13955	FBgn0054054	CG34054	FBgn0033130	Tsp42Ei	FBgn0050349	CG30349	FBgn0033903	CG8323	FBgn0034428	CG18606	FBgn0034290	CG5773	FBgn0035312	CG15820	FBgn0029092	ced-6	FBgn0033139	Tsp42Er	FBgn0013305	Nmda1	FBgn0033131	CR12842	FBgn0051742	CG31742	FBgn0033480	mRpL42	FBgn0050197	CG30197	FBgn0031944	CG7196
FBgn0010287	Trf	FBgn0032243	Klp31E	FBgn0032234	gny	FBgn0028965	A16	FBgn0022893	Df31	FBgn0032724	CG10428	FBgn0083033	snoRNA:Psi18S-525f	FBgn0034391	CG15080	FBgn0034070	SP2353	FBgn0259246	brp	FBgn0033657	Sln	FBgn0033134	Tsp42El	FBgn0033347	CG8248	FBgn0033904	CG18327	FBgn0034429	CG18607	FBgn0034291	CG5770	FBgn0052304	obst-I	FBgn0050000	CG30000	FBgn0033188	CG1600	FBgn0002069	Aats-asp	FBgn0028642		FBgn0243486	rdo	FBgn0028560	sut4	FBgn0033961	CG12859	FBgn0031946	CG7164
FBgn0031988	CG8668	FBgn0262601	SmB	FBgn0004106	cdc2	FBgn0032479	CG16974	FBgn0003866	tsh	FBgn0032726	CG10621	FBgn0083032	snoRNA:Psi18S-525g	FBgn0034396	CG15097	FBgn0034072	Dg	FBgn0033448	hebe	FBgn0085261	CG34232	FBgn0033135	Tsp42En	FBgn0033357	Tom7	FBgn0033906	CG8331	FBgn0054045	CG34045	FBgn0034292	CG5767	FBgn0052302	CG32302	FBgn0033439	CG1773	FBgn0028687	Rpt1	FBgn0013955		FBgn0024294	Spn43Aa	FBgn0032664	CG5755	FBgn0033497	CG12912	FBgn0033980	Cyp6a20	FBgn0031950	Herp
FBgn0261064	Rbsn-5	FBgn0004915	TfIIB	FBgn0000413	da	FBgn0032487	Ski6	FBgn0262886	CR43241	FBgn0086710	RpL30	FBgn0083022	snoRNA:Psi18S-640e	FBgn0034417	CG15117	FBgn0259718	CG42372	FBgn0033464	CG1441	FBgn0050047	CG30047	FBgn0033138	Tsp42Eq	FBgn0033368	CG13743	FBgn0033907	mRpS16	FBgn0034436	CG11961	FBgn0028983	Spn6	FBgn0262368	mir-282	FBgn0033452	CG1599	FBgn0033203	CG2070	FBgn0053007		FBgn0033149	CG11060	FBgn0032666	CG5758	FBgn0033500	CG12913	FBgn0033982	Cyp317a1	FBgn0031952	cdc14
FBgn0031996	CG8460	FBgn0032250	holn1	FBgn0025366	Ip259	FBgn0032488	CG16812	FBgn0032979	CG1832	FBgn0051800	CG31800	FBgn0083031	snoRNA:Psi18S-525h	FBgn0010434	cora	FBgn0085428	Nox	FBgn0001291	Jra	FBgn0033720	CG13160	FBgn0044011	Spn43Ad	FBgn0025709	CG8083	FBgn0001220	Hsc70-5	FBgn0034440	CG10073	FBgn0260401	MED9	FBgn0035427	ckd	FBgn0023175	Prosalpha7	FBgn0033212	CG1399	FBgn0033799	GLaz	FBgn0026602	Ady43A	FBgn0051785	CG31785	FBgn0263271	CG43397	FBgn0027596	CG10249	FBgn0262546	CG43100
FBgn0031997	CG8455	FBgn0027052	CHIP	FBgn0032242	CG5355	FBgn0032489	CG15480	FBgn0032987	RpL21	FBgn0002022	Catsup	FBgn0083030	snoRNA:Psi18S-525i	FBgn0004873		FBgn0034128	CG4409	FBgn0033495	CG12214	FBgn0033760	CG8785	FBgn0033170	sPLA2	FBgn0262515	VhaAC45	FBgn0085472	CG34443	FBgn0034441	CG10081	FBgn0034318	CG14500	FBgn0035438	PHGPx	FBgn0261014	TER94	FBgn0042135	CG18812	FBgn0033813	fsd	FBgn0033154	CG1850	FBgn0261804	CG42750	FBgn0033580	CG13231	FBgn0262868		FBgn0031954	CG14537
FBgn0015299	Ssb-c31a	FBgn0032251	CG13142	FBgn0032244	RfC3	FBgn0032490	CG16813	FBgn0064225	RpL5	FBgn0032746	CG10470	FBgn0083029	snoRNA:Psi18S-525j	FBgn0013325	RpL11	FBgn0034131	CG15712	FBgn0033501	CG12911	FBgn0050053	CG30053	FBgn0050502	fa2h	FBgn0033405	CG13954	FBgn0010638	Sec61beta	FBgn0040729	CG15126	FBgn0064237	Idgf5	FBgn0035496	CG14990	FBgn0033476	oys	FBgn0033222	CG12824	FBgn0053470	CG33470	FBgn0263240	Coop	FBgn0051802	CG31802	FBgn0050021	metro	FBgn0085347		FBgn0051902	Spn28Da
FBgn0032005	Snx6	FBgn0032256	RluA-2	FBgn0262601	SmB	FBgn0032509	CG6523	FBgn0040010	CG17493	FBgn0002021	l(2)37Bb	FBgn0054007	CG34007	FBgn0260934	par-1	FBgn0034136	DAT	FBgn0033502	CG12910	FBgn0033782	sug	FBgn0033192	Corin	FBgn0010549	l(2)03659	FBgn0033949	CG10131	FBgn0034470	Obp56d	FBgn0034365	CG5335	FBgn0035515	CG14997	FBgn0263271	CG43397	FBgn0029093	cathD	FBgn0260964	Vmat	FBgn0004133	blow	FBgn0051788	CG31788	FBgn0085254	CG34225	FBgn0262403	mir-278	FBgn0053121	Spn28Db
FBgn0032014	CG7840	FBgn0026431	Grip75	FBgn0004915	TfIIB	FBgn0051855	CG31855	FBgn0262947	CG43266	FBgn0032749	Phlpp	FBgn0259936	Uhg3	FBgn0010411	RpS18	FBgn0034143	CG8303	FBgn0033504	CAP	FBgn0033786	CG3884	FBgn0033194	Vps13	FBgn0033423	CG1809	FBgn0033968	CG10200	FBgn0034490	CG9864	FBgn0034406	Jheh3	FBgn0041630	Hexo1	FBgn0033541	CG12934	FBgn0033240	CG2906	FBgn0033853	CG6145	FBgn0033232	CG12159	FBgn0085200	CG34171	FBgn0033597	Cpr47Ea	FBgn0083919	Zasp52	FBgn0031986	CG8673
FBgn0032016	CG7818	FBgn0032259	CG6144	FBgn0032250	holn1	FBgn0032512	CG9305	FBgn0002566	lt	FBgn0032751	CG17343	FBgn0032880	CG9318	FBgn0034500	CG11200	FBgn0013763	CG5210	FBgn0033508	Obp46a	FBgn0033787	CG13321	FBgn0050495	CG30495	FBgn0025286	RpL31	FBgn0033970	CG10205	FBgn0050148	CG30148	FBgn0262481	CG43071	FBgn0052249	CG32249	FBgn0033543	CG12338	FBgn0033259	CG11210	FBgn0027581	CG6191	FBgn0026393	Or43b	FBgn0032680	Ntf-2r	FBgn0033602	Cpr47Ee	FBgn0022160	Gpo-1	FBgn0031995	CG8475
FBgn0032020	CG7787	FBgn0032290	CG6443	FBgn0026431	Grip75	FBgn0032514	CG9302	FBgn0086683	Spf45	FBgn0002023	Lim3	FBgn0250785	vari	FBgn0034520	lms	FBgn0034159	CG15615	FBgn0026403	Ndg	FBgn0033792	CG13325	FBgn0033204	CG2065	FBgn0050339	CG30339	FBgn0053506	CG33506	FBgn0034517	Cpr57A	FBgn0262569	CG43109	FBgn0035550	CG11349	FBgn0033544	CG7220	FBgn0033261	CG18316	FBgn0085265	CG34236	FBgn0033236	CG14764	FBgn0032681	CG10283	FBgn0033603	Cpr47Ef	FBgn0013988	Strn-Mlck	FBgn0031998	CG8451
FBgn0032026	CG7627	FBgn0032293	Dpy-30L1	FBgn0010398	Lrr47	FBgn0032516	CG9293	FBgn0262115	CG17683	FBgn0086446	l(2)37Ce	FBgn0032904	Mtp	FBgn0034530	Rcd6	FBgn0026721	fat-spondin	FBgn0261862	whd	FBgn0002789	Mp20	FBgn0033205	CG2064	FBgn0033454	CG1671	FBgn0033981	Cyp6a21	FBgn0022700	Cht4	FBgn0034428	CG18606	FBgn0083044	snoRNA:Psi18S-1397	FBgn0029134	Prosbeta5	FBgn0053087	LRP1	FBgn0033875	CG6357	FBgn0085459	CG34430	FBgn0032694	MESR3	FBgn0033608	CG13220	FBgn0034067	CG8399	FBgn0031999	CG8419
FBgn0032030	Wdr82	FBgn0027868	Nup107	FBgn0032290	CG6443	FBgn0032517	CG7099	FBgn0260799	p120ctn	FBgn0015380	drl	FBgn0010395	betaInt-nu	FBgn0034540	Lrt	FBgn0261642	mbl	FBgn0005586	Rab3	FBgn0052843	Dh31-R1	FBgn0033207	CG12826	FBgn0027580	CG1516	FBgn0013772	Cyp6a8	FBgn0034582	Cht9	FBgn0034429	CG18607	FBgn0250815	Jon65Aiv	FBgn0033582	CG9084	FBgn0050359	Mal-A5	FBgn0033880	CG6553	FBgn0085460	CG34431	FBgn0086200	CG42490	FBgn0033628	CG13203	FBgn0034076	Jhedup	FBgn0032001	CG8360
FBgn0027094	Aats-ala	FBgn0032295	CG12299	FBgn0027868	Nup107	FBgn0032521	CG7110	FBgn0261387	CG17528	FBgn0032793	CG10189	FBgn0032949	Lamp1	FBgn0020617	Rx	FBgn0050101	CG30101	FBgn0033579	CG13229	FBgn0033851	CG13332	FBgn0033214	CG1941	FBgn0033484	CG2269	FBgn0033989	CG7639	FBgn0034583	CG10527	FBgn0054045	CG34045	FBgn0035665	Jon65Aiii	FBgn0033592	CG13215	FBgn0033310	rgr	FBgn0013770	Cp1	FBgn0033240	CG2906	FBgn0086681	Mst36Fa	FBgn0033633	CG7759	FBgn0034089	CG8446	FBgn0032003	CG8349
FBgn0032033	CG13392	FBgn0015320	UbcD2	FBgn0032298	CG6724	FBgn0053640	CG33640	FBgn0033000	CG14464	FBgn0032799	CG10166	FBgn0262631	CR43148	FBgn0000044	Act57B	FBgn0085223	CG34194	FBgn0033587	CG13218	FBgn0033876	synaptogyrin	FBgn0040780	CG12821	FBgn0033485	RpLP0-like	FBgn0034001	mRpL41	FBgn0034603	Glycogenin	FBgn0034437	CG10051	FBgn0035666	Jon65Aii	FBgn0033605	CG9067	FBgn0033321	CG8738	FBgn0005613	Sox15	FBgn0033249	CG11191	FBgn0032707	CG10348	FBgn0260499	qvr	FBgn0261612	Cng	FBgn0032004	CG8292
FBgn0032034	Rcd4	FBgn0027453	Dnz1	FBgn0024227	ial	FBgn0259984	kuz	FBgn0261429	CR42646	FBgn0032813	CG10262	FBgn0003866	tsh	FBgn0083951	CG34115	FBgn0263029	CG43324	FBgn0033589	CG13227	FBgn0013733	shot	FBgn0033246	ACC	FBgn0033494	KCNQ	FBgn0034011	CG8160	FBgn0027073	CG4302	FBgn0034488	CG11208	FBgn0035667	Jon65Ai	FBgn0033624	CG12384	FBgn0040777	CG14767	FBgn0261269	conv	FBgn0040778	CG17977	FBgn0261806	CG42752	FBgn0086712	Egm	FBgn0050100	CG30100	FBgn0028987	Spn2
FBgn0051898	CG31898	FBgn0024227	ial	FBgn0032321	YL-1	FBgn0028541	TM9SF4	FBgn0033029	l(2)NC136	FBgn0032816	Nf-YB	FBgn0262886	CR43241	FBgn0034567	CG15651	FBgn0034253	CG10936	FBgn0085252	CG34223	FBgn0033913	CG8468	FBgn0033250	CG14762	FBgn0033500	CG12913	FBgn0022097	Vha36-1	FBgn0034624	CG17974	FBgn0050148	CG30148	FBgn0035711	CG8519	FBgn0015872	Drip	FBgn0033373	CG8080	FBgn0028428		FBgn0033265	coil	FBgn0051752	CG31752	FBgn0260007	CG42493	FBgn0034117	CG7997	FBgn0262943	CR43262
FBgn0001084	fy	FBgn0032321	YL-1	FBgn0026148	CG12253	FBgn0028931	CG16863	FBgn0033032	kune	FBgn0083037	snoRNA:Psi18S-525b	FBgn0261802	CG42748	FBgn0034570	CG10543	FBgn0034279	CG18635	FBgn0033590	CG13217	FBgn0010241	Mdr50	FBgn0028562	sut2	FBgn0028426	JhI-1	FBgn0262512	Vha14-1	FBgn0050289	CG30289	FBgn0034517	Cpr57A	FBgn0041194	Prat2	FBgn0033639	CG9003	FBgn0027561	CG18659	FBgn0085408	Shroom	FBgn0033268	Obp44a	FBgn0015772	Nak	FBgn0259832	CG34229	FBgn0053458	CG33458	FBgn0032008	CG14277
FBgn0014417	CG13397	FBgn0000146	aub	FBgn0021761	Nup154	FBgn0028658	adat	FBgn0004603	Src42A	FBgn0083035	snoRNA:Psi18S-525d	FBgn0032986	CG3262	FBgn0050291	CG30291	FBgn0028740	CG6362	FBgn0010423	TpnC47D	FBgn0027538	beta4GalNAcTA	FBgn0002571	Mal-A3	FBgn0033540	Elp2	FBgn0020236	ATPCL	FBgn0017482	T3dh	FBgn0034538	CG16799	FBgn0035780	CG18417	FBgn0044020	Roc2	FBgn0028955	CG8788	FBgn0033926	Arc1	FBgn0053087	LRP1	FBgn0032785	CG10026	FBgn0033658	TwdlBeta	FBgn0053459	CG33459	FBgn0262359	CG43057
FBgn0032042	CG13398	FBgn0250837	dUTPase	FBgn0032329	Art8	FBgn0001965	Sos	FBgn0000043	Act42A	FBgn0083031	snoRNA:Psi18S-525h	FBgn0032988	Tif-IA	FBgn0082972	snoRNA:Psi28S-3316a	FBgn0028743	CG5036	FBgn0033614	Obp47b	FBgn0033919	CG8547	FBgn0050361	mtt	FBgn0033548	CG7637	FBgn0027091	Aats-cys	FBgn0085475	CG34446	FBgn0034553	CG9993	FBgn0035781	CG8560	FBgn0040759	CG13177	FBgn0086656	shrb	FBgn0033927	CR10102	FBgn0261588	pdm3	FBgn0032803	CG13082	FBgn0260436	CG42531	FBgn0034137	CG4945	FBgn0262598	mtsh
FBgn0027490	D12	FBgn0032335	CG14915	FBgn0250837	dUTPase	FBgn0015271	Orc5	FBgn0033059	CG7845	FBgn0083020	snoRNA:Psi18S-640g	FBgn0064225	RpL5	FBgn0086669	snoRNA:Psi18S-841a	FBgn0034281	CG14490	FBgn0016047	nompA	FBgn0033931	Obp50e	FBgn0033302	Cyp6a14	FBgn0033557	CG12325	FBgn0010611	Hmgs	FBgn0085474	CG34445	FBgn0000044	Act57B	FBgn0035789	mthl6	FBgn0033697	Cyp6t3	FBgn0050344	CG30344	FBgn0033942	Cpr51A	FBgn0033313	Cirl	FBgn0032804	CG13081	FBgn0033668	CG13188	FBgn0034151	CG15617	FBgn0262002	CG42820
FBgn0043002	Chrac-14	FBgn0032340	Ge-1	FBgn0032346	Csl4	FBgn0012037	Ance	FBgn0050431	CG30431	FBgn0054007	CG34007	FBgn0040010	CG17493	FBgn0083018	snoRNA:Psi18S-841b	FBgn0034286	dpr13	FBgn0033638	CG9005	FBgn0033932	Dh44-R1	FBgn0259226	CG42326	FBgn0033562		FBgn0034131	CG15712	FBgn0050196	CG30196	FBgn0034583	CG10527	FBgn0035811	CG12262	FBgn0033698	CG8858	FBgn0033388	CG8046	FBgn0050197	CG30197	FBgn0033320	CG8586	FBgn0032811	CG10268	FBgn0050039	CG30039	FBgn0010213	Sod2	FBgn0015583	Acp29AB
FBgn0002887	mus201	FBgn0032343	CG6201	FBgn0262647	Nup160	FBgn0028519	CG4500	FBgn0086655	jing	FBgn0262425	mir-288	FBgn0058439	CG40439	FBgn0082969	snoRNA:Psi28S-3316d	FBgn0034301	CG5756	FBgn0033649	pyr	FBgn0010397	LamC	FBgn0033368	CG13743	FBgn0061356	CG18003	FBgn0024315	Picot	FBgn0263031	CG43326	FBgn0034603	Glycogenin	FBgn0035813	CG8492	FBgn0033708	CG8850	FBgn0033402	Myd88	FBgn0053468	CG33468	FBgn0033326	CG14743	FBgn0000464	Lar	FBgn0026176	skpB	FBgn0262307	mir-990	FBgn0040098	lectin-29Ca
FBgn0027780	U26	FBgn0041246	Gr32a	FBgn0032348	CG4751	FBgn0260011	nimC4	FBgn0050443	Opbp	FBgn0259936	Uhg3	FBgn0041004	CG17715	FBgn0082968	snoRNA:Psi28S-3316e	FBgn0063498	GstE2	FBgn0033658	TwdlBeta	FBgn0053468	CG33468	FBgn0025709	CG8083	FBgn0033573	Obp47a	FBgn0085487	CG34458	FBgn0050187	CG30187	FBgn0034612	CG10505	FBgn0035886	Jon66Ci	FBgn0050046	CG30046	FBgn0016078	wun	FBgn0033949	CG10131	FBgn0011300	babo	FBgn0032821	CdGAPr	FBgn0033690	EndoG	FBgn0034182	CG9640	FBgn0032039	CG13385
FBgn0029173	fu2	FBgn0032346	Csl4	FBgn0032354	CG4788	FBgn0261563	wb	FBgn0033095	CG3409	FBgn0032880	CG9318	FBgn0002566	lt	FBgn0010470	Fkbp13	FBgn0034417	CG15117	FBgn0033667	CG13183	FBgn0050479	CG30479	FBgn0082928	snoRNA:Me28S-G3255a	FBgn0010423	TpnC47D	FBgn0010213	Sod2	FBgn0261584	CG42694	FBgn0034624	CG17974	FBgn0035887	Jon66Cii	FBgn0033717	CG8839	FBgn0050000	CG30000	FBgn0262881	CG43236	FBgn0004360	Wnt2	FBgn0003923	snRNA:U2:38ABb	FBgn0033702	CG8854	FBgn0010226	GstS1	FBgn0032047	CG13088
FBgn0032051	CG13097	FBgn0028700	RfC38	FBgn0040232	cmet	FBgn0261535	l(2)34Fd	FBgn0033104	CG15237	FBgn0250785	vari	FBgn0086683	Spf45	FBgn0260477	CG30283	FBgn0034436	CG11961	FBgn0033668	CG13188	FBgn0050480	CG30480	FBgn0033391	CG8026	FBgn0011556	zetaTry	FBgn0040743	CG15919	FBgn0034819	CG9877	FBgn0034628	Acox57D-p	FBgn0035904	CG6776	FBgn0053013	CR33013	FBgn0033438	Mmp2	FBgn0012042	AttA	FBgn0033431	CG1827	FBgn0262543	CR43097	FBgn0054021	CG34021	FBgn0065048	snoRNA:U3:54Aa	FBgn0032055	CG13091
FBgn0032052	CG13089	FBgn0262647	Nup160	FBgn0052831	CG33695	FBgn0001970	Pgant35A	FBgn0022224	ubl	FBgn0032904	Mtp	FBgn0058042	CG40042	FBgn0085397	Fili	FBgn0034446	CG7735	FBgn0033679	CG8888	FBgn0033958	CG12858	FBgn0262515	VhaAC45	FBgn0086712	Egm	FBgn0085220	CG34191	FBgn0050410	Rpi	FBgn0050288	CG30288	FBgn0040321	GNBP3	FBgn0033724	CG8501	FBgn0033439	CG1773	FBgn0003328	scb	FBgn0033438	Mmp2	FBgn0044811	TotF	FBgn0050045	Cpr49Aa	FBgn0034218	CG18467	FBgn0032061	CG9314
FBgn0032054	CG13090	FBgn0032348	CG4751	FBgn0032358	Ppt2	FBgn0005771	noc	FBgn0022960	vimar	FBgn0032921	Mpp6	FBgn0262115	CG17683	FBgn0034697	GM130	FBgn0034481	CG11041	FBgn0050203	CG30203	FBgn0033968	CG10200	FBgn0033395	Cyp4p2	FBgn0033657	Sln	FBgn0034191	CG6984	FBgn0034885	CG4019	FBgn0050289	CG30289	FBgn0023479	Tequila	FBgn0033725	Cpr49Ac	FBgn0033452	CG1599	FBgn0050472	CG30472	FBgn0033440	CG10459	FBgn0032840	sNPF	FBgn0050042	Cpr49Ab	FBgn0034245	CG14482	FBgn0032065	CG12438
FBgn0085470	CG34441	FBgn0032354	CG4788	FBgn0003313	sala	FBgn0028926	NC2beta	FBgn0033160	CG11107	FBgn0261239	Hr39	FBgn0262116	CG40127	FBgn0029147	NtR	FBgn0034484	CG11044	FBgn0033730	Cpr49Ag	FBgn0015714	Cyp6a17	FBgn0015037	Cyp4p1	FBgn0033661	CG13185	FBgn0034197	Cda9	FBgn0034899	CG13560	FBgn0069056	CG33226	FBgn0035964	Dhpr	FBgn0033756	CG17760	FBgn0023175	Prosalpha7	FBgn0019968	Khc-73	FBgn0033447	dila	FBgn0032856	CG16798	FBgn0033723	CG13155	FBgn0082922	snoRNA:Or-aca4	FBgn0032066	CG9463
FBgn0260861	Trs23	FBgn0052831	CG33695	FBgn0032378	CycY	FBgn0001983	wor	FBgn0003460	so	FBgn0032949	Lamp1	FBgn0262117	IntS3	FBgn0034717	CG5819	FBgn0034499	Cpr56F	FBgn0262840	CG43204	FBgn0033978	Cyp6a23	FBgn0033405	CG13954	FBgn0010339	128up	FBgn0262563	CG43103	FBgn0034901	CG11300	FBgn0053225	CG33225	FBgn0035985	Cpr67B	FBgn0033777	CG17574	FBgn0033460	sec24	FBgn0050471	CG30471	FBgn0033484	CG2269	FBgn0040998		FBgn0033728	Cpr49Ae	FBgn0050106	CCHa1r	FBgn0032067	CG9465
FBgn0004914	Hnf4	FBgn0020270	mre11	FBgn0000588	esc	FBgn0003448	sna	FBgn0033169	CG11123	FBgn0262886	CR43241	FBgn0260798	Gprk1	FBgn0034720	Liprin-gamma	FBgn0034530	Rcd6	FBgn0033739	Dyb	FBgn0033982	Cyp317a1	FBgn0010549	l(2)03659	FBgn0085261	CG34232	FBgn0034259	P32	FBgn0023477	Tal	FBgn0000326	clt	FBgn0086076	snoRNA:MeU2-A31	FBgn0013305	Nmda1	FBgn0033463	CG1513	FBgn0050088	CG30088	FBgn0003660	Syb	FBgn0262878	CG43233	FBgn0033730	Cpr49Ag	FBgn0034267	CG4984	FBgn0032068	CG9466
FBgn0032084	CG13101	FBgn0032377	CG14937	FBgn0032388	CG6686	FBgn0001986	l(2)35Df	FBgn0033185	CG1603	FBgn0032979	CG1832	FBgn0040007	RpL38	FBgn0034724	babos	FBgn0034540	Lrt	FBgn0050044	s-cup	FBgn0013467	igl	FBgn0017558	Pdk	FBgn0010621	Cct5	FBgn0034290	CG5773	FBgn0022708	Adk2	FBgn0034710	CG3292	FBgn0003378	Sgs8	FBgn0010488	NAT1	FBgn0261014	TER94	FBgn0050087	CG30087	FBgn0024836	stan	FBgn0262455	mir-1	FBgn0033731	Cpr49Ah	FBgn0085225	CG34196	FBgn0261627	CG42710
FBgn0040964	CG18661	FBgn0032378	CycY	FBgn0085192	CG34163	FBgn0001987	Gli	FBgn0033187	CG2144	FBgn0032987	RpL21	FBgn0260799	p120ctn	FBgn0003175	px	FBgn0034558	CG9236	FBgn0027356	Amph	FBgn0034002	CG8079	FBgn0050340	CG30340	FBgn0033690	EndoG	FBgn0034294	Muc55B	FBgn0260770	CG42568	FBgn0034712	CG3264	FBgn0003377	Sgs7	FBgn0033798	CG15870	FBgn0033476	oys	FBgn0053462	CG33462	FBgn0033542	CG12309	FBgn0051678	CG31678	FBgn0027356	Amph	FBgn0063496	GstE4	FBgn0052986	CG32986
FBgn0032101	CG9586	FBgn0032388	CG6686	FBgn0261266	zuc	FBgn0001994	crp	FBgn0004132	boca	FBgn0064225	RpL5	FBgn0032997	CG17486	FBgn0083004	snoRNA:Psi28S-1175b	FBgn0020617	Rx	FBgn0050053	CG30053	FBgn0083959	trpm	FBgn0050339	CG30339	FBgn0033699	RpS11	FBgn0028983	Spn6	FBgn0035002	CG3419	FBgn0017482	T3dh	FBgn0003373	Sgs3	FBgn0033809	CG4630	FBgn0001291	Jra	FBgn0050083	CG30083	FBgn0017414	cag	FBgn0014859	Hr38	FBgn0033769	CG8768	FBgn0050121	CR30121	FBgn0052987	CG32987
FBgn0032105	borr	FBgn0261266	zuc	FBgn0032390	dgt2	FBgn0028894	CG5869	FBgn0004133	blow	FBgn0040010	CG17493	FBgn0040005	CG17883	FBgn0053143	CG33143	FBgn0034563	CG15649	FBgn0033782	sug	FBgn0034010	CG8157	FBgn0033437	CG12926	FBgn0033708	CG8850	FBgn0063499	GstE10	FBgn0016687	Nurf-38	FBgn0034756	Cyp6d2	FBgn0036181	Muc68Ca	FBgn0040754	CG17059	FBgn0000448	Hr46	FBgn0050089	CG30089	FBgn0262817	CG43188	FBgn0053322	CG33322	FBgn0033778	CG3790	FBgn0034382	CG18609	FBgn0052988	CG32988
FBgn0010314	Cks30A	FBgn0051866	Ada1-2	FBgn0032395	CG6734	FBgn0001086	fzy	FBgn0033204	CG2065	FBgn0058439	CG40439	FBgn0026401	Nipped-B	FBgn0040091	Ugt58Fa	FBgn0083951	CG34115	FBgn0033786	CG3884	FBgn0034011	CG8160	FBgn0033448	hebe	FBgn0050049	CG30049	FBgn0063497	GstE3	FBgn0015040	Cyp9c1	FBgn0050196	CG30196	FBgn0262366	CG43064	FBgn0085265	CG34236	FBgn0003660	Syb	FBgn0013988	Strn-Mlck	FBgn0033578	BBS4	FBgn0051676	CG31676	FBgn0050487	CG30487	FBgn0034412	abba	FBgn0052983	CG32983
FBgn0011232	scat	FBgn0042127	CG18789	FBgn0032398	CG6766	FBgn0040984	CG4440	FBgn0033215	CG1942	FBgn0262947	CG43266	FBgn0039994	CG17082	FBgn0085475	CG34446	FBgn0034565	CG15650	FBgn0033787	CG13321	FBgn0034020		FBgn0033484	CG2269	FBgn0053012	CG33012	FBgn0063495	GstE5	FBgn0035044	CG3663	FBgn0263031	CG43326	FBgn0036226	CG7252	FBgn0033886	CG13349	FBgn0033543	CG12338	FBgn0010052	Jhe	FBgn0003396	shn	FBgn0053318	CR33318	FBgn0033799	GLaz	FBgn0034420	CG10737	FBgn0032072	CG9483
FBgn0032120	CG33298	FBgn0051864	Qtzl	FBgn0032401	CG6792	FBgn0087041	CG42231	FBgn0033216	CG1946	FBgn0041004	CG17715	FBgn0250830	CG12547	FBgn0263030	CG43325	FBgn0034567	CG15651	FBgn0033791	Drl-2	FBgn0022097	Vha36-1	FBgn0004907	14-3-3zeta	FBgn0033720	CG13160	FBgn0063494	GstE6	FBgn0050163	Cpr60D	FBgn0262142	CG42868	FBgn0036227	CG17826	FBgn0013770	Cp1	FBgn0033544	CG7220	FBgn0262026	CG42837	FBgn0033599	CG13223	FBgn0032914	CG14397	FBgn0085341	CG34312	FBgn0261439	SdhA	FBgn0032080	CG9525
FBgn0032130	CG3838	FBgn0051865	Ada1-1	FBgn0032404	RpL7-like	FBgn0028506	CG4455	FBgn0003317	sax	FBgn0086683	Spf45	FBgn0261387	CG17528	FBgn0259179	CG42284	FBgn0085425	CG34396	FBgn0033799	GLaz	FBgn0262512	Vha14-1	FBgn0050011	gem	FBgn0050053	CG30053	FBgn0063492	GstE8	FBgn0025578	Lcp9	FBgn0034769	Obp58c	FBgn0036228	obst-G	FBgn0005613	Sox15	FBgn0053144	CG33144	FBgn0034095	CG15701	FBgn0033627	CG13204	FBgn0083972	CG34136	FBgn0033808	CG4627	FBgn0034446	CG7735	FBgn0052985	CG32985
FBgn0028479	Mtpalpha	FBgn0042125	CG18787	FBgn0085193	CG34164	FBgn0025678	CaBP1	FBgn0050383	CG30383	FBgn0040007	RpL38	FBgn0033000	CG14464	FBgn0050274	CG30274	FBgn0034602	Lapsyn	FBgn0260964	Vmat	FBgn0083919	Zasp52	FBgn0033494	KCNQ	FBgn0050052	Obp49a	FBgn0034362	CG5323	FBgn0035083	Tina-1	FBgn0034783	CG9825	FBgn0036234		FBgn0085408	Shroom	FBgn0029134	Prosbeta5	FBgn0034094	Tsf3	FBgn0050026	CG30026	FBgn0023388	Dap160	FBgn0259219	CG42319	FBgn0034484	CG11044	FBgn0040963	CG18662
FBgn0032135	GlcAT-S	FBgn0032395	CG6734	FBgn0032406	CG14947	FBgn0028523	CG5888	FBgn0027788	Hey	FBgn0260799	p120ctn	FBgn0033005	CG3107	FBgn0050413	CG30413	FBgn0085426	Rgk3	FBgn0033850	CG13331	FBgn0034045	CG8249	FBgn0033504	CAP	FBgn0026741	mRpL18	FBgn0000566	Eip55E	FBgn0035090	CG2736	FBgn0034784	CG9826	FBgn0000594	Est-P	FBgn0033926	Arc1	FBgn0050489	Cyp12d1-p	FBgn0034117	CG7997	FBgn0044020	Roc2	FBgn0032922	CG9249	FBgn0033863	CG13337	FBgn0034497	CG9090	FBgn0032090	CG9582
FBgn0011207	pelo	FBgn0032401	CG6792	FBgn0032408	CG6712	FBgn0001185	her	FBgn0033260	Cul-4	FBgn0261387	CG17528	FBgn0026238	gus	FBgn0034870	CG13559	FBgn0083017	snoRNA:Psi18S-841c	FBgn0033851	CG13332	FBgn0034092	CG7798	FBgn0053474	CG33474	FBgn0086904	Nacalpha	FBgn0034390	CG15093	FBgn0002564	Lsp1gamma	FBgn0050187	CG30187	FBgn0036318	Wbp2	FBgn0050074	Obp50d	FBgn0033592	CG13215	FBgn0050098	CG30098	FBgn0033716	Den1	FBgn0032923	CG9248	FBgn0033864	CG18368	FBgn0085228	CG34199	FBgn0051609	CG31609
FBgn0022720	zf30C	FBgn0028425	JhI-21	FBgn0028707	Mt2	FBgn0015391	glu	FBgn0005648	Pabp2	FBgn0033000	CG14464	FBgn0033010	Atf6	FBgn0050181	CG30181	FBgn0086025	snoRNA:Me28S-A2589c	FBgn0000633	fas	FBgn0262511	Vha44	FBgn0001122	G-oalpha47A	FBgn0000181	bic	FBgn0010551	l(2)03709	FBgn0063924	Kaz1-ORFA	FBgn0085453	CG34424	FBgn0052107	CG32107	FBgn0033931	Obp50e	FBgn0033605	CG9067	FBgn0053960		FBgn0050048	CG30048	FBgn0261586	CG42696	FBgn0033869	Cpr50Cb	FBgn0086604	CG12484	FBgn0028433	Ggamma30A
FBgn0011291	Taf11	FBgn0003145	prd	FBgn0032409	Ced-12	FBgn0032600	CG17912	FBgn0010109	dpn	FBgn0261403	sxc	FBgn0053554	Nipped-A	FBgn0034887	St1	FBgn0034622	CG15666	FBgn0033873	CG6337	FBgn0024232	gprs	FBgn0033538	CG11883	FBgn0033787	CG13321	FBgn0010053	Jheh1	FBgn0262035	CG42846	FBgn0034856	yellow-d2	FBgn0052115	CG32115	FBgn0033945	CG12868	FBgn0015872	Drip	FBgn0034126	CG4398	FBgn0033748	vis	FBgn0032943	Tsp39D	FBgn0261041	stj	FBgn0034509	Obp57c	FBgn0040097	lectin-30A
FBgn0029174	FKBP59	FBgn0032408	CG6712	FBgn0040286	SC35	FBgn0032620	CG12288	FBgn0013726	pnut	FBgn0050441	CG30441	FBgn0261403	sxc	FBgn0034888	St3	FBgn0260477	CG30283	FBgn0033876	synaptogyrin	FBgn0024315	Picot	FBgn0005586	Rab3	FBgn0033788	CG13323	FBgn0034406	Jheh3	FBgn0016715	Reg-2	FBgn0050414	CG30414	FBgn0029167	Hml	FBgn0262881	CG43236	FBgn0033639	CG9003	FBgn0053458	CG33458	FBgn0033749	achi	FBgn0023090	dtr	FBgn0033872	CG6329	FBgn0043534	Obp57b	FBgn0262033	CG42844
FBgn0085212	CG34183	FBgn0032409	Ced-12	FBgn0085424	nub	FBgn0032633	Lrch	FBgn0033277	CG14760	FBgn0033032	kune	FBgn0033017	CG10465	FBgn0034889	CG11293	FBgn0085397	Fili	FBgn0013733	shot	FBgn0034160	CG5550	FBgn0050018	mthl13	FBgn0033789	CG13324	FBgn0034426	CG10476	FBgn0083057	snoRNA:Psi18S-110	FBgn0034884	CG17662	FBgn0036393	CG17362	FBgn0028689	Rpn6	FBgn0044020	Roc2	FBgn0034162	CG6426	FBgn0033750	CG13151	FBgn0023416	Ac3	FBgn0050484	CG30484	FBgn0028622	qsm	FBgn0032109	CG17005
FBgn0032154	CG5924	FBgn0027081	Aats-thr	FBgn0004394	pdm2	FBgn0027885	Aac11	FBgn0014469	Cyp4e2	FBgn0033038	CG7791	FBgn0050441	CG30441	FBgn0011236	ken	FBgn0034693	CG11073	FBgn0033905	CG18324	FBgn0262432	mir-8	FBgn0027525	CG7686	FBgn0027079	Aats-val	FBgn0034429	CG18607	FBgn0035189	CG9119	FBgn0011296	l(2)efl	FBgn0036394	CG9040	FBgn0033962	CG10153	FBgn0033654	Sobp	FBgn0046999	CG6429	FBgn0033755	ClC-b	FBgn0032957	CG2225	FBgn0262215	mir-989	FBgn0034552	CG17999	FBgn0032110	CG3748
FBgn0032157	Etl1	FBgn0051759	CG31759	FBgn0032452	CG15484	FBgn0041184	Socs36E	FBgn0003892	ptc	FBgn0004603	Src42A	FBgn0261429	CR42646	FBgn0034928	CG13562	FBgn0020307	dve	FBgn0050069	CG30069	FBgn0026754	Ugt37c1	FBgn0033579	CG13229	FBgn0033816	CG4679	FBgn0034432	CG7461	FBgn0004430	LysS	FBgn0034899	CG13560	FBgn0036410	CG8100	FBgn0033999	CG8093	FBgn0040759	CG13177	FBgn0034166	CG6472	FBgn0033767	CG13148	FBgn0051619	CG31619	FBgn0261276	opa1-like	FBgn0000044	Act57B	FBgn0263082	CG43350
FBgn0032160	CG4598	FBgn0032429	CG5446	FBgn0032454	CG5787	FBgn0032671	CG7200	FBgn0024189	sns	FBgn0000043	Act42A	FBgn0050440	CG30440	FBgn0034931	CG2812	FBgn0034717	CG5819	FBgn0033911	VGAT	FBgn0004580	Cbp53E	FBgn0033589	CG13227	FBgn0052843	Dh31-R1	FBgn0034437	CG10051	FBgn0053965	CG33965	FBgn0034902	CG5532	FBgn0036422	CG3868	FBgn0034005	alphaPS4	FBgn0033698	CG8858	FBgn0034179	CG6805	FBgn0033770	wuc	FBgn0032966	CG1421	FBgn0033917	CG8503	FBgn0050296	RIC-3	FBgn0032115	CG4438
FBgn0032161	CG4594	FBgn0032452	CG15484	FBgn0021796	Tor	FBgn0032688	CG15160	FBgn0033339	sec31	FBgn0033088	CG3271	FBgn0039969	Fis1	FBgn0034956	CG4324	FBgn0034724	babos	FBgn0033919	CG8547	FBgn0034194	CG15611	FBgn0085252	CG34223	FBgn0024556	EfTuM	FBgn0034441	CG10081	FBgn0053966	CG33966	FBgn0035040	CG4741	FBgn0003388	shd	FBgn0262965	CR43276	FBgn0033708	CG8850	FBgn0034184	CG9646	FBgn0040755	CG17580	FBgn0051600	CG31600	FBgn0047303		FBgn0034576	CG9350	FBgn0262036	CG42847
FBgn0262428	mir-87	FBgn0032454	CG5787	FBgn0028965	A16	FBgn0032690	CG10333	FBgn0004921	Ggamma1	FBgn0259483	Mob4	FBgn0027507	CG1344	FBgn0034972	CG10339	FBgn0053143	CG33143	FBgn0085214	CG34185	FBgn0065047	snoRNA:U3:54Ab	FBgn0010423	TpnC47D	FBgn0033876	synaptogyrin	FBgn0034468	Obp56a	FBgn0035252	CG7970	FBgn0015040	Cyp9c1	FBgn0036454	CG17839	FBgn0262815	CR43186	FBgn0050046	CG30046	FBgn0050456	CG30456	FBgn0033775	Cyp9h1	FBgn0032969	CG2528	FBgn0053506	CG33506	FBgn0034588	CG9394	FBgn0032117	FucTB
FBgn0032168	CG13126	FBgn0032475	Sfmbt	FBgn0024291	Sir2	FBgn0032691	Atac2	FBgn0050349	CG30349	FBgn0022224	ubl	FBgn0033029	l(2)NC136	FBgn0041582	tamo	FBgn0040091	Ugt58Fa	FBgn0033931	Obp50e	FBgn0050457	CG30457	FBgn0043470	lambdaTry	FBgn0033903	CG8323	FBgn0046880	Obp56b	FBgn0035286	CG13924	FBgn0050163	Cpr60D	FBgn0036471	CG13460	FBgn0034031	CG12963	FBgn0033717	CG8839	FBgn0034199	Gbp	FBgn0003975	vg	FBgn0051601	CG31601	FBgn0033985	CG10257	FBgn0034618	CG9485	FBgn0085211	RpS28-like
FBgn0032169	CG4709	FBgn0032476	CG5439	FBgn0032476	CG5439	FBgn0032701	CG10341	FBgn0033354	FANCI	FBgn0033115	Spn42De	FBgn0033032	kune	FBgn0034997	CG3376	FBgn0085475	CG34446	FBgn0033932	Dh44-R1	FBgn0034204	CG10953	FBgn0011556	zetaTry	FBgn0033907	mRpS16	FBgn0046879	Obp56c	FBgn0035298	CG1140	FBgn0027590	CG16936	FBgn0036493	CG7255	FBgn0034032	CG8195	FBgn0033724	CG8501	FBgn0065047	snoRNA:U3:54Ab	FBgn0008654	Su(z)2	FBgn0085202	CG34173	FBgn0013467	igl	FBgn0082963	snoRNA:Psi28S-3378	FBgn0032122	CG31883
FBgn0032171	CG5846	FBgn0051849	CG31849	FBgn0032479	CG16974	FBgn0032702	CG10376	FBgn0027607	CG8230	FBgn0003090	pk	FBgn0263109	CG43366	FBgn0005636	nvy	FBgn0085474	CG34445	FBgn0033942	Cpr51A	FBgn0263076	Klp54D	FBgn0054054	CG34054	FBgn0033911	VGAT	FBgn0034490	CG9864	FBgn0035309	CG15879	FBgn0025578	Lcp9	FBgn0000565	Eip71CD	FBgn0260429	CG42524	FBgn0033755	ClC-b	FBgn0262570	CG43110	FBgn0053007		FBgn0260996	CG42597	FBgn0034020		FBgn0034642	CG15674	FBgn0051709	CG31709
FBgn0032170	CG4658	FBgn0032488	CG16812	FBgn0032487	Ski6	FBgn0032706	Irk3	FBgn0033372	CG13742	FBgn0033160	CG11107	FBgn0004603	Src42A	FBgn0003888	betaTub60D	FBgn0263030	CG43325	FBgn0010397	LamC	FBgn0050106	CCHa1r	FBgn0033649	pyr	FBgn0001220	Hsc70-5	FBgn0034500	CG11200	FBgn0052304	obst-I	FBgn0035090	CG2736	FBgn0261682	CG42729	FBgn0261538	CG42662	FBgn0033756	CG17760	FBgn0034246	Dcr-2	FBgn0033830	CG10814	FBgn0261802	CG42748	FBgn0034027	CG8187	FBgn0260720	CR42547	FBgn0032131	CG3841
FBgn0032172	CG5850	FBgn0032489	CG15480	FBgn0032488	CG16812	FBgn0003896	tup	FBgn0010220	Dbp45A	FBgn0003460	so	FBgn0033049	CG14471	FBgn0005638	slbo	FBgn0260768	CG42566	FBgn0033943	CG12869	FBgn0034262	swi2	FBgn0033665	CG13189	FBgn0047303		FBgn0034545	CG13438	FBgn0035359	CG1143	FBgn0063924	Kaz1-ORFA	FBgn0262529	CG43083	FBgn0050083	CG30083	FBgn0033760	CG8785	FBgn0034253	CG10936	FBgn0033834	CG4744	FBgn0250907	Cht3	FBgn0034030	CG8192	FBgn0034645	CG10320	FBgn0051882	CG31882
FBgn0051875	CG31875	FBgn0032490	CG16813	FBgn0032489	CG15480	FBgn0263198	Acn	FBgn0033376	CG8777	FBgn0050499	CG30499	FBgn0033095	CG3409	FBgn0035039	CG3608	FBgn0050273	CG30273	FBgn0020269	mspo	FBgn0028743	CG5036	FBgn0262820	CG43191	FBgn0085214	CG34185	FBgn0085230	CG34201	FBgn0035409	CG14963	FBgn0063923	Kaz1-ORFB	FBgn0262530	CG43084	FBgn0053465	CG33465	FBgn0026619	Taz	FBgn0034272	Ir54a	FBgn0000119	arr	FBgn0084049	CR41440	FBgn0083919	Zasp52	FBgn0034647	pirk	FBgn0032139	CG13116
FBgn0051755	SoYb	FBgn0032491	CG16815	FBgn0032490	CG16813	FBgn0032751	CG17343	FBgn0015838	Vang	FBgn0004132	boca	FBgn0033115	Spn42De	FBgn0035056	spz6	FBgn0259179	CG42284	FBgn0050480	CG30480	FBgn0034281	CG14490	FBgn0000253	Cam	FBgn0033932	Dh44-R1	FBgn0085231	CG34202	FBgn0035410	CG14964	FBgn0262035	CG42846	FBgn0004592	Eig71Ee	FBgn0034063	CG8389	FBgn0033775	Cyp9h1	FBgn0027572	CG5009	FBgn0004638	drk	FBgn0259247	laccase2	FBgn0022160	Gpo-1	FBgn0034656	CG17922	FBgn0015035	Cyp4e3
FBgn0011823	Pen	FBgn0032493	CG15479	FBgn0032493	CG15479	FBgn0086444	l(2)37Cb	FBgn0033378	tsu	FBgn0004133	blow	FBgn0003090	pk	FBgn0035077	CG9083	FBgn0050274	CG30274	FBgn0033958	CG12858	FBgn0011589	elk	FBgn0050203	CG30203	FBgn0019938	RpI1	FBgn0034548	CG13443	FBgn0260026	CG42494	FBgn0016715	Reg-2	FBgn0036550	CG17026	FBgn0010590	Prosbeta1	FBgn0013305	Nmda1	FBgn0026309	aft	FBgn0033865	CG6220	FBgn0050440	CG30440	FBgn0013988	Strn-Mlck	FBgn0034660	lox2	FBgn0032156	CG13124
FBgn0032189	Ripalpha	FBgn0022069	Nnp-1	FBgn0032499	Uvrag	FBgn0086446	l(2)37Ce	FBgn0033379	Mys45A	FBgn0033205	CG2064	FBgn0003460	so	FBgn0035084	CG15861	FBgn0034797	nahoda	FBgn0033978	Cyp6a23	FBgn0034286	dpr13	FBgn0050047	CG30047	FBgn0082929	snoRNA:Me28S-G2703c	FBgn0034550		FBgn0052284	CG32284	FBgn0035154	CG3344	FBgn0036553	CG17027	FBgn0034068	casp	FBgn0002069	Aats-asp	FBgn0003520	stau	FBgn0033875	CG6357	FBgn0033031	CG8245	FBgn0034067	CG8399	FBgn0243516	Vrp1	FBgn0032176	CG13127
FBgn0032191	CG5734	FBgn0032514	CG9302	FBgn0022069	Nnp-1	FBgn0010300	brat	FBgn0259728	CG42382	FBgn0033225	CG1550	FBgn0050502	fa2h	FBgn0035085	CG3770	FBgn0050413	CG30413	FBgn0033982	Cyp317a1	FBgn0054005	CG34005	FBgn0050049	CG30049	FBgn0050479	CG30479	FBgn0034551	CG15225	FBgn0260430	CG42525	FBgn0035169	CG13890	FBgn0261633	CG42716	FBgn0014020	Rho1	FBgn0010488	NAT1	FBgn0027836	Dgp-1	FBgn0033885	DJ-1alpha	FBgn0085414	dpr12	FBgn0034075	Asph	FBgn0050281	CG30281	FBgn0083945	CG34109
FBgn0032194	CG4901	FBgn0032517	CG7099	FBgn0032509	CG6523	FBgn0015380	drl	FBgn0015561	unpg	FBgn0027788	Hey	FBgn0033199	CG17985	FBgn0003715	CG16778	FBgn0050411	CG30411	FBgn0027596	CG10249	FBgn0034294	Muc55B	FBgn0050043	CG30043	FBgn0033958	CG12858	FBgn0083951	CG34115	FBgn0035413	CG14958	FBgn0004425	LysB	FBgn0036576	CG5151	FBgn0034085	Ptp52F	FBgn0020370	TppII	FBgn0034315	CG5721	FBgn0002643	mam	FBgn0263109	CG43366	FBgn0034081	CG10731	FBgn0050280	CG30280	FBgn0051874	CG31874
FBgn0250843	Pros35	FBgn0023407	B4	FBgn0032514	CG9302	FBgn0024245	dnt	FBgn0033400	CG2063	FBgn0025469	slv	FBgn0040780	CG12821	FBgn0020386	Pdk1	FBgn0034870	CG13559	FBgn0034012	Hr51	FBgn0085415	CG34386	FBgn0033720	CG13160	FBgn0033968	CG10200	FBgn0050291	CG30291	FBgn0086069	snoRNA:Me28S-C3351	FBgn0004427	LysD	FBgn0043578	PGRP-SB1	FBgn0034093	CG15706	FBgn0033798	CG15870	FBgn0034317	CG14499	FBgn0005613	Sox15	FBgn0033061	CG14590	FBgn0034082	CG10734	FBgn0085236	CG34207	FBgn0054043	CG34043
FBgn0032197	CG5694	FBgn0259984	kuz	FBgn0032516	CG9293	FBgn0003732	Top2	FBgn0028473	CG8801	FBgn0033266	Socs44A	FBgn0027788	Hey	FBgn0035104	CG13875	FBgn0034883	CG17664	FBgn0262964	CR43275	FBgn0034335	GstE1	FBgn0027356	Amph	FBgn0016684	NaPi-T	FBgn0034579	mRpL54	FBgn0035427	ckd	FBgn0004430	LysS	FBgn0023197	Jon74E	FBgn0034110	Atg9	FBgn0033853	CG6145	FBgn0034328	IM23	FBgn0085408	Shroom	FBgn0050432	CG30432	FBgn0034089	CG8446	FBgn0085237	CG34208	FBgn0032219	CG4995
FBgn0004419	me31B	FBgn0028919	CG16865	FBgn0032517	CG7099	FBgn0032793	CG10189	FBgn0041087	wun2	FBgn0005648	Pabp2	FBgn0005648	Pabp2	FBgn0083014	snoRNA:Psi18S-996	FBgn0034888	St3	FBgn0262565	CR43105	FBgn0063497	GstE3	FBgn0033760	CG8785	FBgn0033972	Ciao1	FBgn0022700	Cht4	FBgn0052266	CG32266	FBgn0053965	CG33965	FBgn0262531	CG43085	FBgn0262816	CG43187	FBgn0083006	snoRNA:Psi28S-1153	FBgn0013983	imd	FBgn0033933	CG10104	FBgn0085421	Epac	FBgn0034103	CG15704	FBgn0034723	CG13506	FBgn0032229	CG5045
FBgn0026379	Pten	FBgn0004406	tam	FBgn0032521	CG7110	FBgn0053116	CG33116	FBgn0033421	CG1888	FBgn0033272	RagC	FBgn0086021	snoRNA:MeU6-C68	FBgn0262139	trh	FBgn0011236	ken	FBgn0034025	GalNAc-T1	FBgn0063493	GstE7	FBgn0050053	CG30053	FBgn0033989	CG7639	FBgn0034582	Cht9	FBgn0027552	CG10863	FBgn0035252	CG7970	FBgn0085280	CG34251	FBgn0034139	CG4927	FBgn0261989	CG42807	FBgn0003067	Pepck	FBgn0033957		FBgn0033108	CG15236	FBgn0034104	CG15705	FBgn0034766	Obp59a	FBgn0032248	CG5343
FBgn0259482	Mob3	FBgn0026373	RpII33	FBgn0259984	kuz	FBgn0005672	spi	FBgn0010316	dap	FBgn0086021	snoRNA:MeU6-C68	FBgn0033275	CG14756	FBgn0083057	snoRNA:Psi18S-110	FBgn0025334	PHDP	FBgn0262403	mir-278	FBgn0062961	pncr016:2R	FBgn0033782	sug	FBgn0034001	mRpL41	FBgn0034583	CG10527	FBgn0035480	CG14984	FBgn0035309	CG15879	FBgn0052191	CG32191	FBgn0034140	CG8317	FBgn0085265	CG34236	FBgn0262103	Sik3	FBgn0033963	CG12857	FBgn0033121	Cyp6u1	FBgn0085428	Nox	FBgn0028371	jbug	FBgn0021953	Fatp
FBgn0032204	CG4953	FBgn0019890	Smg5	FBgn0028541	TM9SF4	FBgn0262449	mir-2b-2	FBgn0033454	CG1671	FBgn0033275	CG14756	FBgn0014469	Cyp4e2	FBgn0054056	CG34056	FBgn0034938	CG3803	FBgn0034053	Cyp4aa1	FBgn0034397	CG15082	FBgn0033792	CG13325	FBgn0034010	CG8157	FBgn0034588	CG9394	FBgn0035484	CG11594	FBgn0035312	CG15820	FBgn0036782	CG7320	FBgn0034180	Ehbp1	FBgn0033886	CG13349	FBgn0010651	l(2)08717	FBgn0029082	hbs	FBgn0050157	CG30157	FBgn0034135	Syn2	FBgn0011211	blw	FBgn0032265	CG18301
FBgn0003751	trk	FBgn0028530	mTTF	FBgn0028931	CG16863	FBgn0027949	msb1l	FBgn0011241	cbx	FBgn0033277	CG14760	FBgn0015034	Cyp4e1	FBgn0040281	Aplip1	FBgn0034943	Fmo-1	FBgn0034067	CG8399	FBgn0034399	CG15083	FBgn0002789	Mp20	FBgn0034011	CG8160	FBgn0027073	CG4302	FBgn0035513	Cpr64Ad	FBgn0040507	ACXD	FBgn0036805	Chmp1	FBgn0024252		FBgn0013770	Cp1	FBgn0034398	CG15098	FBgn0050081	Ir51b	FBgn0033131	CR12842	FBgn0034156	CG5348	FBgn0001263	inaD	FBgn0032266	CG18302
FBgn0032208	CG5604	FBgn0261535	l(2)34Fd	FBgn0028658	adat	FBgn0032812	Hakai	FBgn0033458	CG18446	FBgn0022027	Vps25	FBgn0024189	sns	FBgn0054022		FBgn0259209	Mlp60A	FBgn0034070	SP2353	FBgn0004168	5-HT1A	FBgn0052843	Dh31-R1	FBgn0034020		FBgn0034624	CG17974	FBgn0035515	CG14997	FBgn0052304	obst-I	FBgn0036821	CG3961	FBgn0023172	RhoGEF2	FBgn0085408	Shroom	FBgn0034405	Jheh2	FBgn0259878	Fs	FBgn0028642		FBgn0034157	resilin	FBgn0034808	CG9896	FBgn0032268	CG6138
FBgn0005322	nmd	FBgn0086711	mol	FBgn0001965	Sos	FBgn0032816	Nf-YB	FBgn0033459	CG12744	FBgn0024189	sns	FBgn0033339	sec31	FBgn0260963		FBgn0034972	CG10339	FBgn0261612	Cng	FBgn0034437	CG10051	FBgn0033851	CG13332	FBgn0022097	Vha36-1	FBgn0034629	Acox57D-d	FBgn0035517	CG1265	FBgn0052302	CG32302	FBgn0036831	CG6839	FBgn0010591	Sply	FBgn0033926	Arc1	FBgn0262481	CG43071	FBgn0050472	CG30472	FBgn0033142		FBgn0025833	CG8910	FBgn0250838	CG30415	FBgn0032269	w-cup
FBgn0032214	CG4968	FBgn0040228	dyn-p25	FBgn0015271	Orc5	FBgn0032819	CG10463	FBgn0011656	Mef2	FBgn0021825	Dmn	FBgn0004921	Ggamma1	FBgn0035192	CG9194	FBgn0034974	CG16786	FBgn0034128	CG4409	FBgn0012051	CalpA	FBgn0033876	synaptogyrin	FBgn0262512	Vha14-1	FBgn0000326	clt	FBgn0035545	CG12607	FBgn0052284	CG32284	FBgn0036843	CG6812	FBgn0016697	Prosalpha5	FBgn0033931	Obp50e	FBgn0004240	Dpt	FBgn0085217	CG34188	FBgn0026602	Ady43A	FBgn0004784	inaC	FBgn0050185	CG30185	FBgn0250826	CG34160
FBgn0032216	CG5384	FBgn0261881	l(2)35Be	FBgn0026373	RpII33	FBgn0032821	CdGAPr	FBgn0033466	Pal1	FBgn0033339	sec31	FBgn0085379	CG34350	FBgn0035199	CG9134	FBgn0050419	CG30419	FBgn0034136	DAT	FBgn0040730	CG15127	FBgn0013733	shot	FBgn0034045	CG8249	FBgn0034712	CG3264	FBgn0035546	CG11345	FBgn0035427	ckd	FBgn0262027	CR42838	FBgn0034219	mthl4	FBgn0033945	CG12868	FBgn0034418	CG15118	FBgn0019968	Khc-73	FBgn0003174	pwn	FBgn0003091	Pkc53E	FBgn0034876	wmd	FBgn0085190	CG34161
FBgn0011703	RnrL	FBgn0028926	NC2beta	FBgn0019890	Smg5	FBgn0032822	CG10466	FBgn0033471	CG12134	FBgn0004921	Ggamma1	FBgn0083124	Uhg4	FBgn0025682	scf	FBgn0005638	slbo	FBgn0034143	CG8303	FBgn0085227	CG34198	FBgn0033905	CG18324	FBgn0034065	Rrp42	FBgn0034727	mRpS29	FBgn0052241	CG32241	FBgn0035438	PHGPx	FBgn0036940	obst-J	FBgn0028956	mthl3	FBgn0033957		FBgn0034434	Rgk1	FBgn0050466	CG30466	FBgn0040513	kappaB-Ras	FBgn0034182	CG9640	FBgn0034877	levy	FBgn0032271	CG7329
FBgn0032223	GATAd	FBgn0001974	l(2)35Bd	FBgn0028519	CG4500	FBgn0014127	barr	FBgn0033474	CG1407	FBgn0027607	CG8230	FBgn0086603	snoRNA:Or-CD2	FBgn0035203	CG9149	FBgn0259707	CG42361	FBgn0024232	gprs	FBgn0034553	CG9993	FBgn0050069	CG30069	FBgn0034069	CG8401	FBgn0034733	CG4752	FBgn0052248	CG32248	FBgn0035484	CG11594	FBgn0036947	obst-F	FBgn0034221	CG10764	FBgn0028689	Rpn6	FBgn0034443	cer	FBgn0050087	CG30087	FBgn0050491	CG30491	FBgn0034183	CG9642	FBgn0250870	CG42241	FBgn0051872	CG31872
FBgn0032224	Sps2	FBgn0004837	Su(H)	FBgn0028530	mTTF	FBgn0003978	vls	FBgn0013435	cdc2rk	FBgn0083124	Uhg4	FBgn0086672	snoRNA:Or-aca5	FBgn0035208	CG9184	FBgn0035039	CG3608	FBgn0050463	CG30463	FBgn0000044	Act57B	FBgn0033913	CG8468	FBgn0083983	mRpL34	FBgn0026261	bonsai	FBgn0035552	CG11350	FBgn0035496	CG14990	FBgn0036949	CG7290	FBgn0034225	veil	FBgn0033962	CG10153	FBgn0040732	CG16926	FBgn0050083	CG30083	FBgn0263046	CG43341	FBgn0010226	GstS1	FBgn0034911	CG5549	FBgn0043825	CG18284
FBgn0027568	Cand1	FBgn0000317	ck	FBgn0261535	l(2)34Fd	FBgn0004374	neb	FBgn0033485	RpLP0-like	FBgn0033375	CG8078	FBgn0015838	Vang	FBgn0041342	Cct1	FBgn0053988	CG33988	FBgn0262307	mir-990	FBgn0065059	snoRNA:660	FBgn0010241	Mdr50	FBgn0001124	Got1	FBgn0034769	Obp58c	FBgn0052237	CG32237	FBgn0035515	CG14997	FBgn0036950	CG6996	FBgn0262570	CG43110	FBgn0003328	scb	FBgn0034507	CG11192	FBgn0050089	CG30089	FBgn0050380	CG30380	FBgn0034202	CG17287	FBgn0020372	TM4SF	FBgn0032275	CG17097
FBgn0003087	pim	FBgn0010422	TfIIS	FBgn0015546	spel1	FBgn0032847	Taf13	FBgn0033491	CG18011	FBgn0082981	snoRNA:Psi28S-2949	FBgn0020621	Pkn	FBgn0250789	alpha-Spec	FBgn0085442	NKAIN	FBgn0026721	fat-spondin	FBgn0034638	CG10433	FBgn0027538	beta4GalNAcTA	FBgn0034092	CG7798	FBgn0034770	Obp58d	FBgn0035582	CG13705	FBgn0035517	CG1265	FBgn0036951	CG7017	FBgn0050104	NT5E-2	FBgn0034005	alphaPS4	FBgn0050154	CG30154	FBgn0034054	CG8366	FBgn0085460	CG34431	FBgn0262882	CG43237	FBgn0034920	CG5597	FBgn0032276	CG17098
FBgn0032231	CG5056	FBgn0001978	stc	FBgn0005771	noc	FBgn0032848	nesd	FBgn0050009	CR30009	FBgn0086672	snoRNA:Or-aca5	FBgn0033408	CG8800	FBgn0261723	Dbx	FBgn0035076	Ance-5	FBgn0034194	CG15611	FBgn0034662	CG13492	FBgn0033919	CG8547	FBgn0259718	CG42372	FBgn0034782	CG12490	FBgn0028699	Rh50	FBgn0053514	CG33514	FBgn0036952	CG6933	FBgn0085222	CG34193	FBgn0262815	CR43186	FBgn0034518	CG13430	FBgn0010052	Jhe	FBgn0040778	CG17977	FBgn0050101	CG30101	FBgn0263006	Ca-P60A	FBgn0032291	CG17118
FBgn0032234	gny	FBgn0259982	l(2)35Cc	FBgn0040228	dyn-p25	FBgn0011638	La	FBgn0033507	CG12909	FBgn0082928	snoRNA:Me28S-G3255a	FBgn0053774	CG33774	FBgn0035308	CG15822	FBgn0035077	CG9083	FBgn0034201	CG17290	FBgn0034709	Swim	FBgn0047303		FBgn0262511	Vha44	FBgn0034783	CG9825	FBgn0035588	CG10672	FBgn0052241	CG32241	FBgn0260393	CG17147	FBgn0250868	CG42239	FBgn0050471	CG30471	FBgn0028622	qsm	FBgn0034081	CG10731	FBgn0033268	Obp44a	FBgn0034218	CG18467	FBgn0053519	Unc-89	FBgn0051870	CG31870
FBgn0000413	da	FBgn0003448	sna	FBgn0028926	NC2beta	FBgn0083037	snoRNA:Psi18S-525b	FBgn0033518	Prx2540-2	FBgn0015838	Vang	FBgn0033412	CG13955	FBgn0035313	CG13810	FBgn0043792	CG30427	FBgn0050458	CG30458	FBgn0034718	wdp	FBgn0033924	CG8613	FBgn0003274	RpLP2	FBgn0261584	CG42694	FBgn0035587	CG4623	FBgn0052249	CG32249	FBgn0036985	zye	FBgn0016701	Rab4	FBgn0034031	CG12963	FBgn0034532	CG13436	FBgn0034103	CG15704	FBgn0010504	kermit	FBgn0034267	CG4984	FBgn0011695	PebIII	FBgn0260453	CG17140
FBgn0051716	Cnot4	FBgn0010382	CycE	FBgn0001974	l(2)35Bd	FBgn0083036	snoRNA:Psi18S-525c	FBgn0033539	Git	FBgn0050342	Prp38	FBgn0033447	dila	FBgn0035325	CG13806	FBgn0035086	CG12851	FBgn0050457	CG30457	FBgn0085236	CG34207	FBgn0085214	CG34185	FBgn0024232	gprs	FBgn0041712	yellow-d	FBgn0035612	CG10625	FBgn0035550	CG11349	FBgn0036996	mag	FBgn0050108	CG30108	FBgn0050088	CG30088	FBgn0034580	Cht8	FBgn0262946	CG43265	FBgn0033277	CG14760	FBgn0034278	CG14488	FBgn0053527	IFa	FBgn0069354	Porin2
FBgn0032244	RfC3	FBgn0001986	l(2)35Df	FBgn0010422	TfIIS	FBgn0083025	snoRNA:Psi18S-640b	FBgn0033540	Elp2	FBgn0259728	CG42382	FBgn0033459	CG12744	FBgn0035338	CG13800	FBgn0035089	Phk-3	FBgn0034204	CG10953	FBgn0034731	CG10384	FBgn0033931	Obp50e	FBgn0020506	Amyrel	FBgn0034893	mRpL43	FBgn0029118	Sucb	FBgn0035607	CG4835	FBgn0037065	CG12974	FBgn0034275	CG5002	FBgn0050083	CG30083	FBgn0003748	Treh	FBgn0085428	Nox	FBgn0261588	pdm3	FBgn0050325	CG30325	FBgn0020521	pio	FBgn0032312	CG14071
FBgn0005683	pie	FBgn0001990	wek	FBgn0027559	Pol32	FBgn0083034	snoRNA:Psi18S-525e	FBgn0024836	stan	FBgn0015561	unpg	FBgn0033474	CG1407	FBgn0261602	RpL8	FBgn0010435	emp	FBgn0010620	Sip1	FBgn0034733	CG4752	FBgn0033932	Dh44-R1	FBgn0024315	Picot	FBgn0034901	CG11300	FBgn0086073	snoRNA:Me18S-A1494	FBgn0029118	Sucb	FBgn0037067	Cpr78Ca	FBgn0026316	UbcD10	FBgn0053465	CG33465	FBgn0086025	snoRNA:Me28S-A2589c	FBgn0034113	CG8060	FBgn0262988	CG43296	FBgn0050110	CG30110	FBgn0035032	CG4692	FBgn0032314	CG7309
FBgn0027052	CHIP	FBgn0002673	twe	FBgn0259982	l(2)35Cc	FBgn0083022	snoRNA:Psi18S-640e	FBgn0033548	CG7637	FBgn0053774	CG33774	FBgn0263260	sel	FBgn0011828	Pxn	FBgn0003715	CG16778	FBgn0050101	CG30101	FBgn0260866	dnr1	FBgn0010397	LamC	FBgn0262432	mir-8	FBgn0025336	CG4882	FBgn0035632	Ppat-Dpck	FBgn0040060	yip7	FBgn0037083	CG5656	FBgn0034291	CG5770	FBgn0034068	casp	FBgn0026369	Sara	FBgn0053960		FBgn0033301	CG12780	FBgn0085225	CG34196	FBgn0035046	CG3683	FBgn0032315	CG14069
FBgn0032251	CG13142	FBgn0001994	crp	FBgn0001981	esg	FBgn0032873	CG2614	FBgn0033551	CG7222	FBgn0033412	CG13955	FBgn0013435	cdc2rk	FBgn0052296	Mrtf	FBgn0035094	CG9380	FBgn0263076	Klp54D	FBgn0050195	CG30195	FBgn0053469	CG33469	FBgn0026754	Ugt37c1	FBgn0023477	Tal	FBgn0002440	l(3)mbn	FBgn0250815	Jon65Aiv	FBgn0037114	Cpr78E	FBgn0034293	CG14495	FBgn0034071	CG8405	FBgn0050286	CG30286	FBgn0053458	CG33458	FBgn0262812	CG43183	FBgn0063498	GstE2	FBgn0035049	Mmp1	FBgn0032318	CG14072
FBgn0026431	Grip75	FBgn0028375	heix	FBgn0001983	wor	FBgn0032880	CG9318	FBgn0033555	RpS15Ab	FBgn0033421	CG1888	FBgn0033482	CG1371	FBgn0086068	snoRNA:Or-CD12	FBgn0035103	Vdup1	FBgn0034253	CG10936	FBgn0085474	CG34445	FBgn0053468	CG33468	FBgn0025833	CG8910	FBgn0034938	CG3803	FBgn0086611	Lcp65Ag3	FBgn0035665	Jon65Aiii	FBgn0010225	Gel	FBgn0034296	CG10912	FBgn0014020	Rho1	FBgn0050287	CG30287	FBgn0034133	CG7813	FBgn0033313	Cirl	FBgn0034383	CG17821	FBgn0010435	emp	FBgn0010612	l(2)06225
FBgn0032259	CG6144	FBgn0001086	fzy	FBgn0003448	sna	FBgn0032906	RPA2	FBgn0033556	CG12343	FBgn0033428	Updo	FBgn0004907	14-3-3zeta	FBgn0035428	CG14960	FBgn0035131	mthl9	FBgn0034279	CG18635	FBgn0034755	CG3746	FBgn0050479	CG30479	FBgn0262307	mir-990	FBgn0034940	CG16787	FBgn0020637	Lcp65Ag2	FBgn0035666	Jon65Aii	FBgn0085334	CG34305	FBgn0260392	CG42518	FBgn0034075	Asph	FBgn0034636	CG10440	FBgn0034156	CG5348	FBgn0033320	CG8586	FBgn0034391	CG15080	FBgn0020908	Scp1	FBgn0026147	CG16833
FBgn0032262	CG7384	FBgn0000250	cact	FBgn0010382	CycE	FBgn0250867	CG42238	FBgn0033557	CG12325	FBgn0033429	CG12929	FBgn0000448	Hr46	FBgn0035430	CG12009	FBgn0082973	snoRNA:Psi28S-3308	FBgn0028740	CG6362	FBgn0034768	Obp58b	FBgn0050480	CG30480	FBgn0004580	Cbp53E	FBgn0034951	CG3860	FBgn0020638	Lcp65Ag1	FBgn0035667	Jon65Ai	FBgn0086608	CG34112	FBgn0034312	CG10916	FBgn0034085	Ptp52F	FBgn0262888	CG43243	FBgn0053544	Vkor	FBgn0033326	CG14743	FBgn0262480	CG43070	FBgn0040688	CG12483	FBgn0040096	lectin-33A
FBgn0010398	Lrr47	FBgn0014092	CG4278	FBgn0001986	l(2)35Df	FBgn0032915	CG12050	FBgn0027525	CG7686	FBgn0025286	RpL31	FBgn0050009	CR30009	FBgn0035431	CG14968	FBgn0054056	CG34056	FBgn0028743	CG5036	FBgn0259145	CG42260	FBgn0033958	CG12858	FBgn0050457	CG30457	FBgn0022708	Adk2	FBgn0020639	Lcp65Af	FBgn0035670	CG10472	FBgn0262605	CG43131	FBgn0034315	CG5721	FBgn0034093	CG15706	FBgn0259710	CG42364	FBgn0034162	CG6426	FBgn0261267	CG42615	FBgn0034438	CG9416	FBgn0035113	pyx	FBgn0032331	CG14913
FBgn0032292	CG6750	FBgn0040984	CG4440	FBgn0001990	wek	FBgn0032919	CG9253	FBgn0033571	Rpb5	FBgn0010316	dap	FBgn0033521	CG12896	FBgn0035432	ZnT63C	FBgn0040281	Aplip1	FBgn0034281	CG14490	FBgn0050265	CG30265	FBgn0033968	CG10200	FBgn0034214	CG6550	FBgn0034971	CG3209	FBgn0020640	Lcp65Ae	FBgn0035679	CG10467	FBgn0263018	snRNA:U4atac:82E	FBgn0053198	pen-2	FBgn0034095	CG15701	FBgn0034656	CG17922	FBgn0034202	CG17287	FBgn0033347	CG8248	FBgn0034460	CG18367	FBgn0035134	CG1231	FBgn0027582	CG6230
FBgn0032293	Dpy-30L1	FBgn0087041	CG42231	FBgn0041627	Ku80	FBgn0024371	E2f2	FBgn0040765	luna	FBgn0033447	dila	FBgn0001122	G-oalpha47A	FBgn0262260	mir-2282	FBgn0035192	CG9194	FBgn0034286	dpr13	FBgn0034782	CG12490	FBgn0015714	Cyp6a17	FBgn0034215	CG4802	FBgn0019643	Dat	FBgn0052405	Cpr65Av	FBgn0002440	l(3)mbn	FBgn0260462	CG12163	FBgn0013983	imd	FBgn0034094	Tsf3	FBgn0034670	CG13488	FBgn0050104	NT5E-2	FBgn0033355	CG13748	FBgn0262824	CG43195	FBgn0035147	Gale	FBgn0032345	CG14921
FBgn0027868	Nup107	FBgn0000307	chif	FBgn0001994	crp	FBgn0032921	Mpp6	FBgn0085253	CG34224	FBgn0011241	cbx	FBgn0033529	CG17765	FBgn0263239	dar1	FBgn0035245	GC	FBgn0053958	CG33958	FBgn0034783	CG9825	FBgn0033978	Cyp6a23	FBgn0085223	CG34194	FBgn0035002	CG3419	FBgn0020642	Lcp65Ac	FBgn0052404	Cpr65Aw	FBgn0037304	CG1113	FBgn0034356	CG10924	FBgn0262816	CG43187	FBgn0259142	Snp	FBgn0050103	CG30103	FBgn0033359	CG8213	FBgn0261580	CG42690	FBgn0082973	snoRNA:Psi28S-3308	FBgn0051867	CG31867
FBgn0032295	CG12299	FBgn0028523	CG5888	FBgn0028895	CG17328	FBgn0263050	CG43345	FBgn0033609	fbl6	FBgn0011656	Mef2	FBgn0033539	Git	FBgn0011653	mas	FBgn0035287	CG13937	FBgn0040737	Tango8	FBgn0034819	CG9877	FBgn0033980	Cyp6a20	FBgn0010409	RpL18A	FBgn0035006	CG4563	FBgn0020643	Lcp65Ab2	FBgn0020643	Lcp65Ab2	FBgn0037370	CG1236	FBgn0034366	Atg7	FBgn0053960		FBgn0034694	CG6613	FBgn0262720	CG43164	FBgn0085379	CG34350	FBgn0261581	CG42691	FBgn0052333	CG32333	FBgn0032360	CG14926
FBgn0032296	CG6729	FBgn0032586	Tpr2	FBgn0028894	CG5869	FBgn0011829	Ret	FBgn0033615	CG7741	FBgn0033471	CG12134	FBgn0024836	stan	FBgn0035504	Teh4	FBgn0261723	Dbx	FBgn0063498	GstE2	FBgn0034828	CG13545	FBgn0013772	Cyp6a8	FBgn0263076	Klp54D	FBgn0016687	Nurf-38	FBgn0086900	Cpr65Ax1	FBgn0020644	Lcp65Ab1	FBgn0261503	CG42651	FBgn0034368	CG5482	FBgn0034139	CG4927	FBgn0034709	Swim	FBgn0034230	CG4853	FBgn0033362	CG8172	FBgn0034480	CG16898	FBgn0011361	mtacp1	FBgn0032364	CG4970
FBgn0015320	UbcD2	FBgn0262191	mir-2497	FBgn0001086	fzy	FBgn0026577	CG8677	FBgn0082585	sprt	FBgn0033474	CG1407	FBgn0033551	CG7222	FBgn0035508	CG15005	FBgn0052311	zormin	FBgn0028496	CG30116	FBgn0034862		FBgn0033982	Cyp317a1	FBgn0050106	CCHa1r	FBgn0035039	CG3608	FBgn0020644	Lcp65Ab1	FBgn0020645	Lcp65Aa	FBgn0037465	CG1105	FBgn0034372	Gint3	FBgn0034180	Ehbp1	FBgn0034741	CG4269	FBgn0034251	CG11423	FBgn0033363	CG13744	FBgn0034484	CG11044	FBgn0035237	CG13917	FBgn0032365	CG14929
FBgn0027453	Dnz1	FBgn0002652	squ	FBgn0040984	CG4440	FBgn0032955	CG2201	FBgn0040503	CG7763	FBgn0263260	sel	FBgn0017414	cag	FBgn0035522	CG1273	FBgn0035313	CG13810	FBgn0003067	Pepck	FBgn0085401		FBgn0013467	igl	FBgn0034259	P32	FBgn0035044	CG3663	FBgn0042118	Cpr65Ax2	FBgn0085300	Cpr65Ay	FBgn0051496	CG31496	FBgn0034379	CG15073	FBgn0024252		FBgn0034744	Vps20	FBgn0034272	Ir54a	FBgn0033365	CG8170	FBgn0034499	Cpr56F	FBgn0035241	CG12105	FBgn0261707	CR42743
FBgn0000018	abo	FBgn0032596	CG17331	FBgn0087041	CG42231	FBgn0022893	Df31	FBgn0001269	inv	FBgn0013435	cdc2rk	FBgn0040765	luna	FBgn0066365	dyl	FBgn0035325	CG13806	FBgn0262569	CG43109	FBgn0034884	CG17662	FBgn0034002	CG8079	FBgn0034262	swi2	FBgn0261373	CG33228	FBgn0020645	Lcp65Aa	FBgn0001258	ImpL3	FBgn0042102	CG18745	FBgn0034396	CG15097	FBgn0023172	RhoGEF2	FBgn0034758	CG13510	FBgn0027572	CG5009	FBgn0033403	CG13739	FBgn0050154	CG30154	FBgn0025712	CG13920	FBgn0028412	Mst33A
FBgn0041781	SCAR	FBgn0032597	CG17904	FBgn0000307	chif	FBgn0003866	tsh	FBgn0000577	en	FBgn0033485	RpLP0-like	FBgn0025373	Fpps	FBgn0261526	NT1	FBgn0035331	DmsR-1	FBgn0004168	5-HT1A	FBgn0034885	CG4019	FBgn0083959	trpm	FBgn0034276	CG6385	FBgn0035064	CG16912	FBgn0261631	CG42714	FBgn0035718	CG14820	FBgn0037518	CG2641	FBgn0034398	CG15098	FBgn0010591	Sply	FBgn0034759	CG13511	FBgn0026309	aft	FBgn0033434	CG1902	FBgn0034539	CG11159	FBgn0035255	RabX5	FBgn0046212	CG15841
FBgn0004872	piwi	FBgn0015391	glu	FBgn0028506	CG4455	FBgn0025674	CycK	FBgn0000556	Ef1alpha48D	FBgn0000448	Hr46	FBgn0003382	sha	FBgn0035557	CG11353	FBgn0011828	Pxn	FBgn0034420	CG10737	FBgn0034900	CG12491	FBgn0034010	CG8157	FBgn0034286	dpr13	FBgn0022343	CG3760	FBgn0035742	CG8629	FBgn0035734	CG14823	FBgn0037560	CR18228	FBgn0034400	CG15099	FBgn0034199	Gbp	FBgn0034761	CG4250	FBgn0003520	stau	FBgn0033440	CG10459	FBgn0040726	dpr	FBgn0027790	GV1	FBgn0032369	CG6614
FBgn0026148	CG12253	FBgn0032600	CG17912	FBgn0025678	CaBP1	FBgn0032979	CG1832	FBgn0004839	otk	FBgn0050009	CR30009	FBgn0021795	Tapdelta	FBgn0035577	CG13708	FBgn0035371	CG9977	FBgn0010434	cora	FBgn0034911	CG5549	FBgn0034011	CG8160	FBgn0034289	CG10910	FBgn0262204	mir-2279	FBgn0035743	CG15829	FBgn0035742	CG8629	FBgn0051464	CG31464	FBgn0262481	CG43071	FBgn0016697	Prosalpha5	FBgn0262141	CG42867	FBgn0027836	Dgp-1	FBgn0027589	CG1688	FBgn0085425	CG34396	FBgn0086906	sls	FBgn0032370	CG12307
FBgn0000146	aub	FBgn0051739	CG31739	FBgn0028523	CG5888	FBgn0040010	CG17493	FBgn0033674	CG8964	FBgn0033502	CG12910	FBgn0033633	CG7759	FBgn0005775	Con	FBgn0035379	spz5	FBgn0034436	CG11961	FBgn0034920	CG5597	FBgn0262964	CR43275	FBgn0034290	CG5773	FBgn0027786	Mtch	FBgn0250836	CG8628	FBgn0035743	CG15829	FBgn0037592	CG11737	FBgn0004240	Dpt	FBgn0034219	mthl4	FBgn0034785	CG3649	FBgn0034345	CG5174	FBgn0028560	sut4	FBgn0003162	Pu	FBgn0052311	zormin	FBgn0032371	CG4983
FBgn0021761	Nup154	FBgn0026150	ApepP	FBgn0001185	her	FBgn0261429	CR42646	FBgn0262820	CG43191	FBgn0033518	Prx2540-2	FBgn0040503	CG7763	FBgn0035592	CG10674	FBgn0035388	CG2162	FBgn0034454	CG15120	FBgn0261794	kcc	FBgn0262565	CR43105	FBgn0034292	CG5767	FBgn0035121	Tudor-SN	FBgn0010387	Dbi	FBgn0035780	CG18417	FBgn0037601	Cyp313b1	FBgn0034443	cer	FBgn0028956	mthl3	FBgn0034786	CG13531	FBgn0003067	Pepck	FBgn0085250	CG34221	FBgn0034603	Glycogenin	FBgn0035343	CG16762	FBgn0032372	CG4988
FBgn0250837	dUTPase	FBgn0032634	Rpb11	FBgn0032597	CG17904	FBgn0033029	l(2)NC136	FBgn0004463	RpIII128	FBgn0033521	CG12896	FBgn0033649	pyr	FBgn0035586	CG10671	FBgn0003938	snRNA:U5:63BC	FBgn0040730	CG15127	FBgn0029105	alpha-catenin-related	FBgn0262815	CR43186	FBgn0054005	CG34005	FBgn0261636	CG42719	FBgn0035787	CG8543	FBgn0035781	CG8560	FBgn0259992	CG42489	FBgn0002716	mei-W68	FBgn0034221	CG10764	FBgn0004896	fd59A	FBgn0085419	Rgk2	FBgn0000448	Hr46	FBgn0085426	Rgk3	FBgn0035344	Cyp4d20	FBgn0259960	CG42470
FBgn0032339	CG4705	FBgn0032635	CG15141	FBgn0015391	glu	FBgn0033032	kune	FBgn0027504	CG8878	FBgn0033529	CG17765	FBgn0259832	CG34229	FBgn0010747	Srp54k	FBgn0035398	Cht7	FBgn0034481	CG11041	FBgn0022708	Adk2	FBgn0034020		FBgn0085415	CG34386	FBgn0052483	CG32483	FBgn0035788	CG8541	FBgn0035789	mthl6	FBgn0040532	CG8369	FBgn0034470	Obp56d	FBgn0262570	CG43110	FBgn0034788	CG13532	FBgn0034377	CG15071	FBgn0033500	CG12913	FBgn0043070	MESK2	FBgn0262593	Shab	FBgn0259961	CG42471
FBgn0032340	Ge-1	FBgn0032640	Sgt	FBgn0032600	CG17912	FBgn0025458		FBgn0033691	CG8860	FBgn0033539	Git	FBgn0004839	otk	FBgn0065097	snmRNA:357	FBgn0052270	CG32270	FBgn0034484	CG11044	FBgn0034971	CG3209	FBgn0022097	Vha36-1	FBgn0053958	CG33958	FBgn0086064	snoRNA:Me28S-G3113b	FBgn0052374	CG32374	FBgn0035790	Cyp316a1	FBgn0051100	CG31100	FBgn0034494	CG10444	FBgn0050104	NT5E-2	FBgn0034796	CG3700	FBgn0034398	CG15098	FBgn0024836	stan	FBgn0259727	CG42381	FBgn0035404	CG12079	FBgn0259962	Sfp33A1
FBgn0032341	Reps	FBgn0024689	fws	FBgn0051739	CG31739	FBgn0002774	mle	FBgn0033693	CG13175	FBgn0033548	CG7637	FBgn0033674	CG8964	FBgn0086073	snoRNA:Me18S-A1494	FBgn0035431	CG14968	FBgn0034499	Cpr56F	FBgn0259209	Mlp60A	FBgn0262512	Vha14-1	FBgn0063499	GstE10	FBgn0035189	CG9119	FBgn0052376	CG32376	FBgn0015033	Cyp4d8	FBgn0037672	sage	FBgn0043536	Obp57d	FBgn0085222	CG34193	FBgn0261564	CG42678	FBgn0034408	sano	FBgn0053144	CG33144	FBgn0034651	CG15676	FBgn0052271	CG32271	FBgn0032375	CG14932
FBgn0261983	l(2)gd1	FBgn0262856	CG43220	FBgn0026150	ApepP	FBgn0004603	Src42A	FBgn0033741	CG8545	FBgn0033555	RpS15Ab	FBgn0262820	CG43191	FBgn0035636	Cralbp	FBgn0035432	ZnT63C	FBgn0034501	CG13868	FBgn0050419	CG30419	FBgn0034045	CG8249	FBgn0063496	GstE4	FBgn0004425	LysB	FBgn0001208	Hn	FBgn0035811	CG12262	FBgn0037683	CG18473	FBgn0034517	Cpr57A	FBgn0250868	CG42239	FBgn0034804	CG3831	FBgn0034416	CG15109	FBgn0086898	dgo	FBgn0027360	Tim10	FBgn0052283	dro3	FBgn0261056	Sfp33A4
FBgn0028700	RfC38	FBgn0001301	kel	FBgn0032629	beat-IIIc	FBgn0033059	CG7845	FBgn0033744	Dh44-R2	FBgn0033556	CG12343	FBgn0262423	mir-281-2	FBgn0035643	CG13287	FBgn0064227	Rdh	FBgn0034541	CG13437	FBgn0000037	mAcR-60C	FBgn0034053	Cyp4aa1	FBgn0063495	GstE5	FBgn0004426	LysC	FBgn0035856	CG13679	FBgn0001208	Hn	FBgn0037684	CG8129	FBgn0034542	Fem-1	FBgn0016701	Rab4	FBgn0261584	CG42694	FBgn0034418	CG15118	FBgn0262817	CG43188	FBgn0034666	CG9294	FBgn0035439	CG14961	FBgn0259963	Sfp33A2
FBgn0032354	CG4788	FBgn0032671	CG7200	FBgn0032633	Lrch	FBgn0050431	CG30431	FBgn0033751	CG8818	FBgn0017414	cag	FBgn0262394	mir-281-1	FBgn0035676	CG6619	FBgn0035504	Teh4	FBgn0034558	CG9236	FBgn0010414	SerT	FBgn0262511	Vha44	FBgn0050118	CG30118	FBgn0004427	LysD	FBgn0035858	CG13674	FBgn0035886	Jon66Ci	FBgn0037730	CG9444	FBgn0034543	CG30152	FBgn0034246	Dcr-2	FBgn0040660	CG13551	FBgn0034423	CG7229	FBgn0033578	BBS4	FBgn0085399	CG34370	FBgn0004888	Scsalpha	FBgn0259964	Sfp33A3
FBgn0040232	cmet	FBgn0086707	ncm	FBgn0032634	Rpb11	FBgn0086655	jing	FBgn0011592	fra	FBgn0040765	luna	FBgn0033691	CG8860	FBgn0035677	CG13293	FBgn0035508	CG15005	FBgn0020617	Rx	FBgn0035002	CG3419	FBgn0034136	DAT	FBgn0034351	CG5190	FBgn0004428	LysE	FBgn0035859	CG13678	FBgn0035887	Jon66Cii	FBgn0037783	Npc2c	FBgn0261394	Pros29	FBgn0050108	CG30108	FBgn0015372	chrw	FBgn0034434	Rgk1	FBgn0003382	sha	FBgn0085234	CG34205	FBgn0035490	CG1136	FBgn0051704	CG31704
FBgn0052831	CG33695	FBgn0003270	amos	FBgn0032635	CG15141	FBgn0050443	Opbp	FBgn0033754	Ak6	FBgn0041174	Vhl	FBgn0083988	snoRNA:Me28S-C3420a	FBgn0061492	loj	FBgn0035511	Cpr64Ab	FBgn0034567	CG15651	FBgn0035006	CG4563	FBgn0040505	Alk	FBgn0262476	CG43066	FBgn0004430	LysS	FBgn0001248	Idh	FBgn0000116	Argk	FBgn0037786	CG5361	FBgn0034573	CG3295	FBgn0034275	CG5002	FBgn0034894	CG4091	FBgn0085226		FBgn0033629	Tsp47F	FBgn0034725	CG6044	FBgn0004516	Gad1	FBgn0259989	CG42486
FBgn0020270	mre11	FBgn0032690	CG10333	FBgn0027885	Aac11	FBgn0033081	geminin	FBgn0086532	Spt-I	FBgn0021795	Tapdelta	FBgn0033721	CG13159	FBgn0005658	Ets65A	FBgn0035513	Cpr64Ad	FBgn0085425	CG34396	FBgn0035022	CG11413	FBgn0024232	gprs	FBgn0034360	CG10927	FBgn0053966	CG33966	FBgn0035906	CG6673	FBgn0023479	Tequila	FBgn0037817	Cyp12e1	FBgn0034577	cpa	FBgn0026316	UbcD10	FBgn0034897	Sesn	FBgn0034462	CG15905	FBgn0050026	CG30026	FBgn0034730	ppk12	FBgn0035501	CG1299	FBgn0032381	Mal-B1
FBgn0032363	CG6509	FBgn0005617	msl-1	FBgn0015609	CadN	FBgn0000054	Adf1	FBgn0033802	CG17724	FBgn0082585	sprt	FBgn0011592	fra	FBgn0035685	CG13297	FBgn0035521	VhaM9.7-a	FBgn0034602	Lapsyn	FBgn0035041	CG13594	FBgn0024315	Picot	FBgn0034362	CG5323	FBgn0035203	CG9149	FBgn0035911	CG6638	FBgn0085485	CG34456	FBgn0040251	Ugt86Di	FBgn0003162	Pu	FBgn0034296	CG10912	FBgn0034913	usnp	FBgn0034468	Obp56a	FBgn0260007	CG42493	FBgn0034737	CG11362	FBgn0035505	Teh2	FBgn0032382	Mal-B2
FBgn0032374	CG14931	FBgn0032702	CG10376	FBgn0001301	kel	FBgn0259483	Mob4	FBgn0028991	seq	FBgn0033633	CG7759	FBgn0033754	Ak6	FBgn0002526	LanA	FBgn0035543	CG15020	FBgn0085426	Rgk3	FBgn0035043	CG4781	FBgn0034155	unc-104	FBgn0000566	Eip55E	FBgn0010246	Myo61F	FBgn0035926	CG5804	FBgn0035985	Cpr67B	FBgn0040250	Ugt86Dj	FBgn0003891	tud	FBgn0260392	CG42518	FBgn0034943	Fmo-1	FBgn0050447	CG30447	FBgn0085259	CG34230	FBgn0034785	CG3649	FBgn0040697	Teh3	FBgn0261805	CG42751
FBgn0000588	esc	FBgn0032703	CG10343	FBgn0041184	Socs36E	FBgn0033095	CG3409	FBgn0011763	Dp	FBgn0040503	CG7763	FBgn0025692	CG3814	FBgn0001258	ImpL3	FBgn0035547	CG15022	FBgn0082970	snoRNA:Psi28S-3316c	FBgn0053988	CG33988	FBgn0259738	CG42392	FBgn0034390	CG15093	FBgn0035272	mRpL46	FBgn0035929	CG13311	FBgn0053926	CG33926	FBgn0262972	CR43283	FBgn0034602	Lapsyn	FBgn0034312	CG10916	FBgn0005612	Sox14	FBgn0034502	CG13871	FBgn0260436	CG42531	FBgn0034821	CG9876	FBgn0035510	Cpr64Aa	FBgn0032385	CG16964
FBgn0261266	zuc	FBgn0025608	Faf	FBgn0032671	CG7200	FBgn0027066	Eb1	FBgn0004638	drk	FBgn0001269	inv	FBgn0003975	vg	FBgn0086680	vvl	FBgn0014073	Tie	FBgn0034644	CG10082	FBgn0028738	ETH	FBgn0053544	Vkor	FBgn0010651	l(2)08717	FBgn0035286	CG13924	FBgn0085455	CG34426	FBgn0036024	CG18180	FBgn0260744	Tango9	FBgn0050392	CG30392	FBgn0034315	CG5721	FBgn0019948	Phm	FBgn0034510	CG13426	FBgn0033668	CG13188	FBgn0085452	CG34423	FBgn0035512	Cpr64Ac	FBgn0263107	bft
FBgn0032390	dgt2	FBgn0027070	CG17322	FBgn0086707	ncm	FBgn0033104	CG15237	FBgn0000662	fl(2)d	FBgn0259832	CG34229	FBgn0010488	NAT1	FBgn0035719	tow	FBgn0035557	CG11353	FBgn0034692	CG13502	FBgn0004055	uzip	FBgn0034160	CG5550	FBgn0010551	l(2)03709	FBgn0000109	Aprt	FBgn0085456	CG34427	FBgn0052068	CG32068	FBgn0037975	CG3397	FBgn0034623	CG9822	FBgn0053198	pen-2	FBgn0034990	CG11406	FBgn0050154	CG30154	FBgn0050039	CG30039	FBgn0034856	yellow-d2	FBgn0035538	DopEcR	FBgn0032387	CG16965
FBgn0032391	escl	FBgn0032723	ssp3	FBgn0262456	mir-125	FBgn0022224	ubl	FBgn0086356	tum	FBgn0033663	ERp60	FBgn0033785	Sans	FBgn0035736	Cpr65Eb	FBgn0035577	CG13708	FBgn0020307	dve	FBgn0035092	Nplp1	FBgn0026754	Ugt37c1	FBgn0034397	CG15082	FBgn0035298	CG1140	FBgn0035931	CG13312	FBgn0052071	CG32071	FBgn0038009	CG17738	FBgn0050286	CG30286	FBgn0013983	imd	FBgn0019886	Letm1	FBgn0262690	CR43160	FBgn0262300	mir-988	FBgn0034861	CG9815	FBgn0035539	slow	FBgn0014019	Rh5
FBgn0042127	CG18789	FBgn0032724	CG10428	FBgn0032688	CG15160	FBgn0260991	Incenp	FBgn0261975	CG42806	FBgn0033665	CG13189	FBgn0033791	Drl-2	FBgn0035750	CG14826	FBgn0035583	CG13704	FBgn0034718	wdp	FBgn0262679	CG43149	FBgn0025833	CG8910	FBgn0263116	5-HT1B	FBgn0035309	CG15879	FBgn0000116	Argk	FBgn0003378	Sgs8	FBgn0038037	Cyp9f2	FBgn0034636	CG10440	FBgn0034356	CG10924	FBgn0035022	CG11413	FBgn0034580	Cht8	FBgn0054021	CG34021	FBgn0034862		FBgn0035542	DOR	FBgn0032397	Tom70
FBgn0051864	Qtzl	FBgn0032725	Nedd8	FBgn0032690	CG10333	FBgn0033159	Dscam	FBgn0033902	Tango7	FBgn0004839	otk	FBgn0013955		FBgn0035771	sec63	FBgn0040842	CG15212	FBgn0034720	Liprin-gamma	FBgn0025592	Gyk	FBgn0003091	Pkc53E	FBgn0004168	5-HT1A	FBgn0035334	CG8993	FBgn0023479	Tequila	FBgn0003377	Sgs7	FBgn0000455	Dip-C	FBgn0034647	pirk	FBgn0003067	Pepck	FBgn0035023	itp	FBgn0086024	snoRNA:Me28S-A2589b	FBgn0050048	CG30048	FBgn0000241	bw	FBgn0262870	axo	FBgn0027505	rab3-GAP
FBgn0042125	CG18787	FBgn0032728	Tango6	FBgn0032691	Atac2	FBgn0033160	CG11107	FBgn0000289	cg	FBgn0033674	CG8964	FBgn0053007		FBgn0035798	frac	FBgn0035592	CG10674	FBgn0034723	CG13506	FBgn0085296	CG34267	FBgn0004580	Cbp53E	FBgn0034426	CG10476	FBgn0035355	CG16985	FBgn0036023	CG18179	FBgn0003373	Sgs3	FBgn0038053	CG18549	FBgn0259708	CG42362	FBgn0034366	Atg7	FBgn0020521	pio	FBgn0000395	cv-2	FBgn0033731	Cpr49Ah	FBgn0034889	CG11293	FBgn0035575	CG7509	FBgn0051861	CG31861
FBgn0032395	CG6734	FBgn0032730	CG10431	FBgn0032693	Cyp310a1	FBgn0033169	CG11123	FBgn0033912	RpS23	FBgn0033677	CG8321	FBgn0020391	Nrk	FBgn0261788	Ank2	FBgn0004380	Klp64D	FBgn0034731	CG10384	FBgn0085297	CG34268	FBgn0034194	CG15611	FBgn0034427	CG10474	FBgn0035359	CG1143	FBgn0036024	CG18180	FBgn0036181	Muc68Ca	FBgn0040493	grsm	FBgn0034688	CG11474	FBgn0034368	CG5482	FBgn0015040	Cyp9c1	FBgn0034627	EfSec	FBgn0033736	CG13154	FBgn0020372	TM4SF	FBgn0035600	CG4769	FBgn0051860	CG31860
FBgn0028425	JhI-21	FBgn0001202	hk	FBgn0032698	CG10336	FBgn0033178	CG11127	FBgn0033915	CG8485	FBgn0014184	Oda	FBgn0033827	CG17047	FBgn0052369	CG32369	FBgn0035611	CG13285	FBgn0260866	dnr1	FBgn0261636	CG42719	FBgn0050457	CG30457	FBgn0050127	CG30127	FBgn0035374	mRpS35	FBgn0044048	Ilp5	FBgn0036225	CG5883	FBgn0041710	yellow-f	FBgn0034694	CG6613	FBgn0034372	Gint3	FBgn0035049	Mmp1	FBgn0050287	CG30287	FBgn0033753	Cyp301a1	FBgn0261794	kcc	FBgn0065097	snmRNA:357	FBgn0032419	CG17217
FBgn0027081	Aats-thr	FBgn0002022	Catsup	FBgn0032701	CG10341	FBgn0015929	dpa	FBgn0033934	CG17385	FBgn0262394	mir-281-1	FBgn0083006	snoRNA:Psi28S-1153	FBgn0016694	Pdp1	FBgn0015766	Msr-110	FBgn0050195	CG30195	FBgn0052483	CG32483	FBgn0034204	CG10953	FBgn0054045	CG34045	FBgn0260430	CG42525	FBgn0052068	CG32068	FBgn0036226	CG7252	FBgn0003308	ry	FBgn0034705	CG11170	FBgn0259202	CG42306	FBgn0035057	CG3880	FBgn0034636	CG10440	FBgn0061359	CG33671	FBgn0034940	CG16787	FBgn0035625	Blimp-1	FBgn0032424	CG17010
FBgn0000114	aret	FBgn0263198	Acn	FBgn0032702	CG10376	FBgn0033185	CG1603	FBgn0019938	RpI1	FBgn0033691	CG8860	FBgn0053155	CG33155	FBgn0001253	ImpE1	FBgn0260458	PGRP-LD	FBgn0085474	CG34445	FBgn0024277	trio	FBgn0010620	Sip1	FBgn0034441	CG10081	FBgn0047135	CG32276	FBgn0036108	Cpr67Fa1	FBgn0036227	CG17826	FBgn0038113	CG11668	FBgn0050279	CG30279	FBgn0053998	CG33998	FBgn0035065	CG3589	FBgn0050222	CG30222	FBgn0033763	CG8646	FBgn0034942	CG13566	FBgn0259164	CG42269	FBgn0032431	CG5435
FBgn0051759	CG31759	FBgn0032748	CG10492	FBgn0032725	Nedd8	FBgn0033187	CG2144	FBgn0050077	blos1	FBgn0033699	RpS11	FBgn0261975	CG42806	FBgn0260442	rhea	FBgn0035636	Cralbp	FBgn0034755	CG3746	FBgn0035187	Trh	FBgn0263076	Klp54D	FBgn0013325	RpL11	FBgn0086068	snoRNA:Or-CD12	FBgn0036109	Cpr67Fa2	FBgn0036228	obst-G	FBgn0038139	CG8795	FBgn0034706	CG11275	FBgn0034398	CG15098	FBgn0035070	CG3650	FBgn0259710	CG42364	FBgn0261673	nemy	FBgn0053519	Unc-89	FBgn0005626	ple	FBgn0051858	t-cup
FBgn0020443	Elf	FBgn0032752	CG10702	FBgn0015772	Nak	FBgn0261385	scra	FBgn0003742	tra2	FBgn0083988	snoRNA:Me28S-C3420a	FBgn0020766	Aats-phe	FBgn0060292	snoRNA:U49:66Da	FBgn0259167	CG42272	FBgn0263030	CG43325	FBgn0035189	CG9119	FBgn0034247	CG6484	FBgn0082987	snoRNA:Psi28S-2444	FBgn0035428	CG14960	FBgn0036110	Cpr67Fb	FBgn0036234		FBgn0041711	yellow-e	FBgn0050277	Oatp58Da	FBgn0034400	CG15099	FBgn0050424	CG30424	FBgn0034659	CG4021	FBgn0261545	CG42663	FBgn0034959	CG11388	FBgn0053556	form3	FBgn0032448	CG5781
FBgn0032444	CG5525	FBgn0086445	l(2)37Cd	FBgn0032728	Tango6	FBgn0033210	U2A	FBgn0083123	Uhg5	FBgn0033751	CG8818	FBgn0085471	CG34442	FBgn0035921	CG13305	FBgn0003984	vn	FBgn0260768	CG42566	FBgn0010246	Myo61F	FBgn0050106	CCHa1r	FBgn0040730	CG15127	FBgn0035430	CG12009	FBgn0052073	CG32073	FBgn0036262	CG6910	FBgn0038172	Adgf-D	FBgn0034741	CG4269	FBgn0262481	CG43071	FBgn0035089	Phk-3	FBgn0042098	CG18735	FBgn0040755	CG17580	FBgn0050172	CG30172	FBgn0035795	CG16998	FBgn0032457	CG15483
FBgn0032446	CG5780	FBgn0086446	l(2)37Ce	FBgn0001202	hk	FBgn0033215	CG1942	FBgn0050476	ave	FBgn0086904	Nacalpha	FBgn0085472	CG34443	FBgn0035922	Pex7	FBgn0052406	CG32406	FBgn0050269	CG30269	FBgn0053230	CG33230	FBgn0034262	swi2	FBgn0085227	CG34198	FBgn0262269	mir-955	FBgn0014368	nol	FBgn0036300	CG10688	FBgn0038173	Adgf-C	FBgn0034742	CG4294	FBgn0034434	Rgk1	FBgn0010435	emp	FBgn0034667	comr	FBgn0003975	vg	FBgn0034974	CG16786	FBgn0035802	CG33275	FBgn0040508	ACXC
FBgn0032450	CG5776	FBgn0024245	dnt	FBgn0051800	CG31800	FBgn0003317	sax	FBgn0015602	BEAF-32	FBgn0000181	bic	FBgn0085473	CG34444	FBgn0035936	Tsp66E	FBgn0052405	Cpr65Av	FBgn0028371	jbug	FBgn0035244	ABCB7	FBgn0260764	CG42562	FBgn0040729	CG15126	FBgn0035471	Sc2	FBgn0052074	CG32074	FBgn0052107	CG32107	FBgn0260226	CG42500	FBgn0034744	Vps20	FBgn0034439	CG10062	FBgn0035091	CG3829	FBgn0034670	CG13488	FBgn0033785	Sans	FBgn0259210	prom	FBgn0035816	CG13685	FBgn0040509	ACXB
FBgn0032451	spict	FBgn0003346	RanGap	FBgn0263198	Acn	FBgn0050383	CG30383	FBgn0029082	hbs	FBgn0020391	Nrk	FBgn0261613	Oaz	FBgn0035941	CG13313	FBgn0035685	CG13297	FBgn0259145	CG42260	FBgn0082944	snoRNA:Me28S-A2634c	FBgn0034279	CG18635	FBgn0046880	Obp56b	FBgn0027552	CG10863	FBgn0036138	CG14143	FBgn0036321	CG14120	FBgn0262983	CG43291	FBgn0053143	CG33143	FBgn0034443	cer	FBgn0085582	CG41257	FBgn0005778	PpD5	FBgn0050487	CG30487	FBgn0053527	IFa	FBgn0035817	CG7409	FBgn0040510	ACXA
FBgn0032452	CG15484	FBgn0003732	Top2	FBgn0032751	CG17343	FBgn0003082	phr	FBgn0033998	row	FBgn0086532	Spt-I	FBgn0001332	L	FBgn0002528	LanB2	FBgn0002526	LanA	FBgn0259179	CG42284	FBgn0035265	CG18173	FBgn0028743	CG5036	FBgn0046879	Obp56c	FBgn0035513	Cpr64Ad	FBgn0036157	CG7560	FBgn0036361	CG10154	FBgn0038214	CG9616	FBgn0034756	Cyp6d2	FBgn0002716	mei-W68	FBgn0085638	CG41378	FBgn0034705	CG11170	FBgn0008654	Su(z)2	FBgn0050161	CG30161	FBgn0052369	CG32369	FBgn0032464	Vha68-3
FBgn0032455	CG5792	FBgn0003231	ref(2)P	FBgn0086444	l(2)37Cb	FBgn0025360	Optix	FBgn0013750	Arf51F	FBgn0033842	cbc	FBgn0050077	blos1	FBgn0036039	Naa60	FBgn0035710	SP1173	FBgn0050274	CG30274	FBgn0250789	alpha-Spec	FBgn0034281	CG14490	FBgn0034475	Obp56h	FBgn0035534	mRpS6	FBgn0262021	CG42832	FBgn0036362	CG10725	FBgn0038241	CG8087	FBgn0034758	CG13510	FBgn0028622	qsm	FBgn0052475	mthl8	FBgn0050279	CG30279	FBgn0085341	CG34312	FBgn0035046	CG3683	FBgn0040832	CG8012	FBgn0020368	Vha68-1
FBgn0032465	CG12404	FBgn0027949	msb1l	FBgn0010300	brat	FBgn0020279	lig	FBgn0034013	unc-5	FBgn0024556	EfTuM	FBgn0033945	CG12868	FBgn0000451	ect	FBgn0035719	tow	FBgn0050265	CG30265	FBgn0035293	CG5687	FBgn0011589	elk	FBgn0034488	CG11208	FBgn0035551	CG7465	FBgn0036181	Muc68Ca	FBgn0029167	Hml	FBgn0038242	CG14852	FBgn0262142	CG42868	FBgn0262370	mir-7	FBgn0035099	CG6845	FBgn0034706	CG11275	FBgn0033818	CG4712	FBgn0035050	ST6Gal	FBgn0035858	CG13674	FBgn0262352	CG43050
FBgn0021796	Tor	FBgn0032812	Hakai	FBgn0024245	dnt	FBgn0033260	Cul-4	FBgn0034029	eIF2B-gamma	FBgn0014877	Roe1	FBgn0010638	Sec61beta	FBgn0036121	CG6310	FBgn0035735	Cpr65Ea	FBgn0034789	PIP5K59B	FBgn0035358	CG14949	FBgn0034286	dpr13	FBgn0061362	CG33785	FBgn0035592	CG10674	FBgn0086254	CG6084	FBgn0036393	CG17362	FBgn0038260	CG14855	FBgn0050273	CG30273	FBgn0034543	CG30152	FBgn0035107	mri	FBgn0034737	CG11362	FBgn0033834	CG4744	FBgn0040666	CG12848	FBgn0035888	CG7120	FBgn0032471	CG5122
FBgn0028965	A16	FBgn0005590	scw	FBgn0003346	RanGap	FBgn0050372	Asap1	FBgn0053464		FBgn0083006	snoRNA:Psi28S-1153	FBgn0083123	Uhg5	FBgn0052073	CG32073	FBgn0035736	Cpr65Eb	FBgn0034797	nahoda	FBgn0035360	CG1246	FBgn0054005	CG34005	FBgn0034541	CG13437	FBgn0035588	CG10672	FBgn0036208	CG10361	FBgn0036394	CG9040	FBgn0038312	CG4334	FBgn0040658	CG13516	FBgn0261394	Pros29	FBgn0053229	CG33229	FBgn0034739	CG3927	FBgn0050065	CG30065	FBgn0085434	NaCP60E	FBgn0086348	se	FBgn0032472	CG9928
FBgn0024291	Sir2	FBgn0032818	CG10628	FBgn0003732	Top2	FBgn0005648	Pabp2	FBgn0003425		FBgn0053155	CG33155	FBgn0082951	snoRNA:Me18S-C1366	FBgn0052082	CG32082	FBgn0035756	unc-13-4A	FBgn0050194	CG30194	FBgn0035364		FBgn0034293	CG14495	FBgn0034553	CG9993	FBgn0035619	CG10592	FBgn0036211	CG5946	FBgn0000639	Fbp1	FBgn0038365	CG9593	FBgn0034784	CG9826	FBgn0034573	CG3295	FBgn0262109	CR42862	FBgn0034742	CG4294	FBgn0033866	CG6280	FBgn0043792	CG30427	FBgn0262508	CG43078	FBgn0040972	CG16978
FBgn0032475	Sfmbt	FBgn0032822	CG10466	FBgn0032793	CG10189	FBgn0021995	Rs1	FBgn0034049	bdg	FBgn0261975	CG42806	FBgn0082926	snoRNA:Me28S-U1848	FBgn0036139	CG6216	FBgn0035777	CG8563	FBgn0050413	CG30413	FBgn0263177		FBgn0034294	Muc55B	FBgn0011824	CG4038	FBgn0035620	CG5150	FBgn0036227	CG17826	FBgn0036422	CG3868	FBgn0051183	CG31183	FBgn0034786	CG13531	FBgn0034577	cpa	FBgn0085483	CG34454	FBgn0034753	CG2852	FBgn0033867	Cpr50Ca	FBgn0262566	CG43106	FBgn0035914	CG6282	FBgn0032474	DnaJ-H
FBgn0032476	CG5439	FBgn0004811	fs(2)ltoPP43	FBgn0032796	CG10188	FBgn0011659	Mlh1	FBgn0034057	CG8314	FBgn0020766	Aats-phe	FBgn0082952	snoRNA:Me18S-A1061	FBgn0036147	Plod	FBgn0259935	CG42458	FBgn0028497	CG3530	FBgn0262593	Shab	FBgn0085415	CG34386	FBgn0027073	CG4302	FBgn0035630	CG10576	FBgn0036234		FBgn0003388	shd	FBgn0038431	CG10405	FBgn0046253	CG3502	FBgn0022700	Cht4	FBgn0085482	CG34453	FBgn0034740	nsr	FBgn0261041	stj	FBgn0050429	CG30429	FBgn0035917	Zasp66	FBgn0032481	CG16972
FBgn0051849	CG31849	FBgn0003978	vls	FBgn0053116	CG33116	FBgn0010109	dpn	FBgn0034059	CG8320	FBgn0040751	CG13018	FBgn0082931	snoRNA:Me28S-G2703a	FBgn0036152	CG6175	FBgn0035785	CG8546	FBgn0050411	CG30411	FBgn0052280	CG32280	FBgn0028983	Spn6	FBgn0082970	snoRNA:Psi28S-3316c	FBgn0261631	CG42714	FBgn0085271	CG34242	FBgn0036471	CG13460	FBgn0028381	decay	FBgn0040660	CG13551	FBgn0003162	Pu	FBgn0024806	DIP2	FBgn0034761	CG4250	FBgn0050484	CG30484	FBgn0069969	CG40498	FBgn0035921	CG13305	FBgn0032482	Pect
FBgn0032480	Edem2	FBgn0003141	pr	FBgn0005672	spi	FBgn0013726	pnut	FBgn0029175	Ext2	FBgn0033907	mRpS16	FBgn0082919	snoRNA:Or-CD4	FBgn0036168	CG7512	FBgn0035792	CG7548	FBgn0034862		FBgn0260430	CG42525	FBgn0260401	MED9	FBgn0083017	snoRNA:Psi18S-841c	FBgn0001258	ImpL3	FBgn0036337	CG11255	FBgn0036493	CG7255	FBgn0004577	Pxd	FBgn0034860	CG9812	FBgn0034602	Lapsyn	FBgn0052845	CG32845	FBgn0262141	CG42867	FBgn0033885	DJ-1alpha	FBgn0262123	l(2)41Ab	FBgn0003149	Prm	FBgn0032483	CG15482
FBgn0004192	snRNA:U2:34ABb	FBgn0004374	neb	FBgn0027949	msb1l	FBgn0262316	mir-986	FBgn0034083	lbk	FBgn0033912	RpS23	FBgn0033960	CG10151	FBgn0003292	rt	FBgn0035798	frac	FBgn0085401		FBgn0085294	CG34265	FBgn0034335	GstE1	FBgn0034624	CG17974	FBgn0035736	Cpr65Eb	FBgn0040813	Nplp2	FBgn0000565	Eip71CD	FBgn0038484	CG5246	FBgn0000241	bw	FBgn0085426	Rgk3	FBgn0035132	mthl10	FBgn0034785	CG3649	FBgn0033887	St4	FBgn0040017		FBgn0052023	CG32023	FBgn0027586	CG5867
FBgn0032485	CG9426	FBgn0032847	Taf13	FBgn0032812	Hakai	FBgn0022027	Vps25	FBgn0034086	CG8441	FBgn0033917	CG8503	FBgn0001319	kn	FBgn0036198	crim	FBgn0261788	Ank2	FBgn0034883	CG17664	FBgn0004167	kst	FBgn0063498	GstE2	FBgn0260223	CG42497	FBgn0035742	CG8629	FBgn0053263	CG33263	FBgn0261682	CG42729	FBgn0085308	CG34279	FBgn0050181	CG30181	FBgn0050392	CG30392	FBgn0023000	mth	FBgn0034788	CG13532	FBgn0002643	mam	FBgn0020908	Scp1	FBgn0035931	CG13312	FBgn0032494	CG5945
FBgn0032486	CG5705	FBgn0015803	rtGEF	FBgn0032816	Nf-YB	FBgn0003892	ptc	FBgn0034087	clu	FBgn0033934	CG17385	FBgn0033983	CG10253	FBgn0036202	CG6024	FBgn0035815	Snmp2	FBgn0034886	Pde8	FBgn0262260	mir-2282	FBgn0063497	GstE3	FBgn0085399	CG34370	FBgn0250836	CG8628	FBgn0036359	CG14105	FBgn0262529	CG43083	FBgn0038508	CG5866	FBgn0041234	Gr59f	FBgn0083018	snoRNA:Psi18S-841b	FBgn0035140	CG17180	FBgn0261564	CG42678	FBgn0261269	conv	FBgn0260995	CG42596	FBgn0052024	CG32024	FBgn0051851	CG31851
FBgn0003935	snRNA:U5:34A	FBgn0083038	snoRNA:Psi18S-525a	FBgn0032818	CG10628	FBgn0033341	MrgBP	FBgn0024249	cato	FBgn0261613	Oaz	FBgn0262954	Rpb12	FBgn0259140	CG42255	FBgn0052369	CG32369	FBgn0025334	PHDP	FBgn0052264	CG32264	FBgn0063496	GstE4	FBgn0034727	mRpS29	FBgn0035750	CG14826	FBgn0036361	CG10154	FBgn0262530	CG43084	FBgn0053333	CG33333	FBgn0011296	l(2)efl	FBgn0083045	snoRNA:Psi18S-1389b	FBgn0035160	CG13897	FBgn0052835	CR32835	FBgn0050076	CG30076	FBgn0035097	CG13405	FBgn0035948	CG5644	FBgn0051730	CG31730
FBgn0032499	Uvrag	FBgn0051687	CG31687	FBgn0032819	CG10463	FBgn0050349	CG30349	FBgn0050096	CG30096	FBgn0001332	L	FBgn0050081	Ir51b	FBgn0036237	viaf	FBgn0035833	CG7565	FBgn0029105	alpha-catenin-related	FBgn0064227	Rdh	FBgn0063495	GstE5	FBgn0034731	CG10384	FBgn0035751	CG14829	FBgn0036362	CG10725	FBgn0004592	Eig71Ee	FBgn0262023	CG42834	FBgn0034902	CG5532	FBgn0026369	Sara	FBgn0086065	snoRNA:Me28S-G3113a	FBgn0261614	CG42703	FBgn0033963	CG12857	FBgn0035103	Vdup1	FBgn0035949	CG13314	FBgn0040973	CG16824
FBgn0051852	Tap42	FBgn0032863	cdc23	FBgn0032822	CG10466	FBgn0033349	CG8243	FBgn0262560	wcd	FBgn0010638	Sec61beta	FBgn0013750	Arf51F	FBgn0041096	rols	FBgn0035844	CG13676	FBgn0034943	Fmo-1	FBgn0035476	CG12766	FBgn0063493	GstE7	FBgn0083005	snoRNA:Psi28S-1175a	FBgn0028648	mRpL50	FBgn0029167	Hml	FBgn0085481	CG34452	FBgn0262024	CG42835	FBgn0034903	CG9850	FBgn0050286	CG30286	FBgn0035173	CG13907	FBgn0034829	CG9899	FBgn0020767	Spred	FBgn0035104	CG13875	FBgn0001223	Hsp22	FBgn0032503	CG16825
FBgn0032512	CG9305	FBgn0032864	CG2493	FBgn0004811	fs(2)ltoPP43	FBgn0033354	FANCI	FBgn0011260	Sema-2a	FBgn0083123	Uhg5	FBgn0262565	CR43105	FBgn0250876	Sema-5c	FBgn0035865	CG7201	FBgn0259209	Mlp60A	FBgn0035477	CG14982	FBgn0063492	GstE8	FBgn0085475	CG34446	FBgn0259203	CG42307	FBgn0036393	CG17362	FBgn0085480	CG34451	FBgn0038509	CG14332	FBgn0034906	CG13561	FBgn0050287	CG30287	FBgn0035176	CG13905	FBgn0040063	yip3	FBgn0033973	HPS1	FBgn0035112	CG13877	FBgn0035982	CG4461	FBgn0032511	CG9306
FBgn0032513	CG6565	FBgn0032870	CG2608	FBgn0014127	barr	FBgn0033372	CG13742	FBgn0034138	RpS15	FBgn0082926	snoRNA:Me28S-U1848	FBgn0034025	GalNAc-T1	FBgn0036271	Pbgs	FBgn0035875	Cpr66Cb	FBgn0034972	CG10339	FBgn0016013	Faa	FBgn0262476	CG43066	FBgn0034755	CG3746	FBgn0015298	Srp19	FBgn0036467	CG12310	FBgn0036553	CG17027	FBgn0038523	CG7587	FBgn0034914	CG5554	FBgn0034636	CG10440	FBgn0024277	trio	FBgn0263084	CG43352	FBgn0027596	CG10249	FBgn0035113	pyx	FBgn0023129	aay	FBgn0032519	CG16957
FBgn0032517	CG7099	FBgn0032876	Cen	FBgn0003978	vls	FBgn0010220	Dbp45A	FBgn0016131	Cdk4	FBgn0050476	ave	FBgn0034027	CG8187	FBgn0036274	CG4328	FBgn0035879	CG7112	FBgn0034985	CG3328	FBgn0004516	Gad1	FBgn0085419	Rgk2	FBgn0034768	Obp58b	FBgn0035787	CG8543	FBgn0036471	CG13460	FBgn0261633	CG42716	FBgn0003375	Sgs5	FBgn0085242	CG34213	FBgn0050290	Ppcdc	FBgn0004870	bab1	FBgn0034859	CG3520	FBgn0033985	CG10257	FBgn0035134	CG1231	FBgn0019644	ATPsyn-b	FBgn0032520	CG10859
FBgn0023407	B4	FBgn0032877	CG2617	FBgn0003141	pr	FBgn0086672	snoRNA:Or-aca5	FBgn0034168	CG15614	FBgn0033960	CG10151	FBgn0024754	Flo-1	FBgn0052105	CG32105	FBgn0035896	CG6983	FBgn0050419	CG30419	FBgn0035495	CG14989	FBgn0062961	pncr016:2R	FBgn0034769	Obp58c	FBgn0035788	CG8541	FBgn0053986	CG33986	FBgn0036575	CG5157	FBgn0040565	CG7606	FBgn0005612	Sox14	FBgn0034674	CG9304	FBgn0004431	LysX	FBgn0034869	CG13558	FBgn0259737	CG42391	FBgn0035161	CG13898	FBgn0036044	CG14168	FBgn0032525	Hsp60D
FBgn0024846	p38b	FBgn0032882	ns4	FBgn0004374	neb	FBgn0033376	CG8777	FBgn0085219	CG34190	FBgn0001319	kn	FBgn0023441	fus	FBgn0036282	Smyd4	FBgn0035903	CG6765	FBgn0050418	nord	FBgn0035498	Fit1	FBgn0034399	CG15083	FBgn0034770	Obp58d	FBgn0035792	CG7548	FBgn0261682	CG42729	FBgn0010424	TpnC73F	FBgn0038643	CG14300	FBgn0034958	CG3907	FBgn0259142	Snp	FBgn0004426	LysC	FBgn0034897	Sesn	FBgn0259878	Fs	FBgn0035170	dpr20	FBgn0044328	CG32052	FBgn0261992	CG42810
FBgn0028919	CG16865	FBgn0032884	Pomp	FBgn0032846	CG10721	FBgn0015838	Vang	FBgn0026402	NiPp1	FBgn0033972	Ciao1	FBgn0050080	CG30080	FBgn0036287	CG10663	FBgn0260442	rhea	FBgn0005636	nvy	FBgn0003206	Ras64B	FBgn0263116	5-HT1B	FBgn0259145	CG42260	FBgn0052374	CG32374	FBgn0053983	obst-H	FBgn0023197	Jon74E	FBgn0085311	CG34282	FBgn0011726	tsr	FBgn0034688	CG11474	FBgn0035193	CG9192	FBgn0034902	CG5532	FBgn0050472	CG30472	FBgn0035178		FBgn0053205		FBgn0051846
FBgn0001965	Sos	FBgn0032886	CG9328	FBgn0032847	Taf13	FBgn0033378	tsu	FBgn0022029	l(2)k01209	FBgn0033983	CG10253	FBgn0003130	Poxn	FBgn0036294	CG10654	FBgn0052029	Cpr66D	FBgn0000037	mAcR-60C	FBgn0035517	CG1265	FBgn0004168	5-HT1A	FBgn0010078	RpL23	FBgn0035805	CG7506	FBgn0085481	CG34452	FBgn0262531	CG43085	FBgn0038647	CG14302	FBgn0034965	CG13568	FBgn0034694	CG6613	FBgn0035199	CG9134	FBgn0034950	Pask	FBgn0085217	CG34188	FBgn0052320	CG32320	FBgn0052050		FBgn0028943	CG15638
FBgn0004406	tam	FBgn0032907	CG9272	FBgn0032848	nesd	FBgn0033379	Mys45A	FBgn0034217	Lhr	FBgn0033987	ckn	FBgn0003425		FBgn0036298	nst	FBgn0261259	Fhos	FBgn0010414	SerT	FBgn0053514	CG33514	FBgn0034436	CG11961	FBgn0003062	Fib	FBgn0042112	mRpL36	FBgn0085480	CG34451	FBgn0085280	CG34251	FBgn0038681	Cyp12a4	FBgn0034989	CG3356	FBgn0085235	CG34206	FBgn0262937	Rabex-5	FBgn0003353	sei	FBgn0034022	CG12964	FBgn0035272	mRpL46	FBgn0026404	Nc	FBgn0032530	CG9263
FBgn0015271	Orc5	FBgn0032925	CG9246	FBgn0032858	CG10949	FBgn0050342	Prp38	FBgn0263233	robls54B	FBgn0029082	hbs	FBgn0034059	CG8320	FBgn0036299	Tsf2	FBgn0035928	CG13310	FBgn0035010	CG13579	FBgn0035544	CG15021	FBgn0034437	CG10051	FBgn0065073	snoRNA:229	FBgn0035865	CG7201	FBgn0036532	CG13445	FBgn0036766	CG5506	FBgn0038716	CG7342	FBgn0034996	CG13575	FBgn0034705	CG11170	FBgn0035207	CG9153	FBgn0034965	CG13568	FBgn0034030	CG8192	FBgn0027790	GV1	FBgn0036094	CG14153	FBgn0028941	CG16853
FBgn0026373	RpII33	FBgn0263050	CG43345	FBgn0032864	CG2493	FBgn0033389	Rad51C	FBgn0024196	robl	FBgn0034001	mRpL41	FBgn0034061	CG8386	FBgn0083978	CG17672	FBgn0035936	Tsp66E	FBgn0259707	CG42361	FBgn0035545	CG12607	FBgn0012051	CalpA	FBgn0034819	CG9877	FBgn0001248	Idh	FBgn0036547	CG17032	FBgn0036782	CG7320	FBgn0038717	CG17751	FBgn0034997	CG3376	FBgn0034706	CG11275	FBgn0035211	CG2211	FBgn0034996	CG13575	FBgn0050466	CG30466	FBgn0035279	Cpr62Ba	FBgn0053493	CG33493	FBgn0028513	CG9254
FBgn0260407	mRpS23	FBgn0000239	bur	FBgn0032871	CG2611	FBgn0259728	CG42382	FBgn0034224	CG6520	FBgn0013750	Arf51F	FBgn0034072	Dg	FBgn0036351	CG14107	FBgn0043806	CG32032	FBgn0035041	CG13594	FBgn0035546	CG11345	FBgn0040730	CG15127	FBgn0034828	CG13545	FBgn0035906	CG6673	FBgn0036551	CG17029	FBgn0052198	CG32198	FBgn0038719	CG16727	FBgn0034999	CG3394	FBgn0050277	Oatp58Da	FBgn0003295	ru	FBgn0035023	itp	FBgn0050087	CG30087	FBgn0035280	Cpr62Bb	FBgn0047038	CG6463	FBgn0028848	CG7311
FBgn0028916	CG33090	FBgn0032929	Mcm10	FBgn0086657	ik2	FBgn0015561	unpg	FBgn0034232	CG4866	FBgn0034025	GalNAc-T1	FBgn0014020	Rho1	FBgn0001256	ImpL1	FBgn0035966		FBgn0035043	CG4781	FBgn0035551	CG7465	FBgn0085227	CG34198	FBgn0034862		FBgn0035909	ergic53	FBgn0036563	CG13075	FBgn0036820	CG6852	FBgn0038783	CG4367	FBgn0002787	Mov34	FBgn0013272	Gp150	FBgn0035237	CG13917	FBgn0020521	pio	FBgn0050089	CG30089	FBgn0035281	Cpr62Bc	FBgn0036101	NijA	FBgn0028847	CG9014
FBgn0001970	Pgant35A	FBgn0032934	CG8679	FBgn0032877	CG2617	FBgn0033400	CG2063	FBgn0034237	eIF3-S9	FBgn0034029	eIF2B-gamma	FBgn0029175	Ext2	FBgn0036352	CG14110	FBgn0035967		FBgn0053988	CG33988	FBgn0052237	CG32237	FBgn0046880	Obp56b	FBgn0085401		FBgn0035911	CG6638	FBgn0040799	CG13051	FBgn0036831	CG6839	FBgn0038784	CG4362	FBgn0035023	itp	FBgn0034744	Vps20	FBgn0035246	CG13928	FBgn0015040	Cyp9c1	FBgn0010052	Jhe	FBgn0035287	CG13937	FBgn0036115		FBgn0263206	CG43376
FBgn0015546	spel1	FBgn0026577	CG8677	FBgn0032906	RPA2	FBgn0028473	CG8801	FBgn0034243	ns2	FBgn0024754	Flo-1	FBgn0034087	clu	FBgn0260049	flr	FBgn0052040	CG32040	FBgn0028738	ETH	FBgn0035582	CG13705	FBgn0046879	Obp56c	FBgn0050185	CG30185	FBgn0011509	SrpRbeta	FBgn0040798	CG13069	FBgn0036833	CG3819	FBgn0046689	Takl1	FBgn0035040	CG4741	FBgn0053143	CG33143	FBgn0035248	CG13919	FBgn0050161	CG30161	FBgn0050095	CG30095	FBgn0259701	CG42355	FBgn0036116	CG7888	FBgn0051845	CR31845
FBgn0086711	mol	FBgn0021856	l(2)k14505	FBgn0250867	CG42238	FBgn0041087	wun2	FBgn0034258	eIF3-S8	FBgn0013762	Cdk5	FBgn0028424	JhI-26	FBgn0036377	CG10710	FBgn0052037	CG32037	FBgn0035076	Ance-5	FBgn0035583	CG13704	FBgn0034475	Obp56h	FBgn0034884	CG17662	FBgn0035926	CG5804	FBgn0036588	CG13068	FBgn0036875	CG9449	FBgn0028396	TotA	FBgn0035065	CG3589	FBgn0034761	CG4250	FBgn0035251	CG7967	FBgn0035057	CG3880	FBgn0050094	CG30094	FBgn0086906	sls	FBgn0036143	CG14142	FBgn0032533	CG16888
FBgn0261881	l(2)35Be	FBgn0032938	CG8671	FBgn0032915	CG12050	FBgn0004360	Wnt2	FBgn0016059	Sema-1b	FBgn0034035	CG8207	FBgn0050096	CG30096	FBgn0262350		FBgn0036017	CG3280	FBgn0060296	pain	FBgn0035587	CG4623	FBgn0034481	CG11041	FBgn0034885	CG4019	FBgn0085456	CG34427	FBgn0036589	CG13067	FBgn0036942	CG7328	FBgn0011672	Mvl	FBgn0000157	Dll	FBgn0262141	CG42867	FBgn0027594	drpr	FBgn0000157	Dll	FBgn0034081	CG10731	FBgn0035410	CG14964	FBgn0036145	CG7607	FBgn0025115	Acyp
FBgn0001974	l(2)35Bd	FBgn0022893	Df31	FBgn0040297	Nhe2	FBgn0033421	CG1888	FBgn0045800	Uhg1	FBgn0050080	CG30080	FBgn0011260	Sema-2a	FBgn0043550	Tsp68C	FBgn0002528	LanB2	FBgn0035094	CG9380	FBgn0035607	CG4835	FBgn0034501	CG13868	FBgn0262728	Pal2	FBgn0011787	mRpL12	FBgn0040797	CG13066	FBgn0036947	obst-F	FBgn0039015	Takl2	FBgn0050423	CG30423	FBgn0262142	CG42868	FBgn0022702	Cht2	FBgn0035070	CG3650	FBgn0034082	CG10734	FBgn0035427	ckd	FBgn0261553	CG42671	FBgn0032536	Ance-3
FBgn0004837	Su(H)	FBgn0000559	Ef2b	FBgn0032919	CG9253	FBgn0010342	Map60	FBgn0034264	CG10933	FBgn0003130	Poxn	FBgn0034142	CG8306	FBgn0036381	CG8745	FBgn0085411	CG34382	FBgn0035103	Vdup1	FBgn0035610	Lkr	FBgn0034541	CG13437	FBgn0034893	mRpL43	FBgn0035947	Srp68	FBgn0036594	CG13047	FBgn0036949	CG7290	FBgn0039031	CG17244	FBgn0060296	pain	FBgn0034784	CG9826	FBgn0027790	GV1	FBgn0035086	CG12851	FBgn0034091	mrj	FBgn0052283	dro3	FBgn0259481	Mob2	FBgn0261582	CG42692
FBgn0010422	TfIIS	FBgn0032961	CG1416	FBgn0024371	E2f2	FBgn0010316	dap	FBgn0022740	HLH54F	FBgn0034050	CG8297	FBgn0034145	CG5065	FBgn0036382	CG13737	FBgn0052057	dpr10	FBgn0259744		FBgn0035611	CG13285	FBgn0040726	dpr	FBgn0002174	l(2)tid	FBgn0036046	Ilp2	FBgn0261635	CG42718	FBgn0036950	CG6996	FBgn0262975	cnc	FBgn0050424	CG30424	FBgn0034786	CG13531	FBgn0035285	CG12025	FBgn0035091	CG3829	FBgn0034103	CG15704	FBgn0262535	CG43089	FBgn0036183	CG6083	FBgn0028526	CG15293
FBgn0262526	vas	FBgn0051612	CG31612	FBgn0032921	Mpp6	FBgn0050001	CG30001	FBgn0028744	CG5033	FBgn0034057	CG8314	FBgn0034168	CG15614	FBgn0042630	Sox21b	FBgn0036102	CG12523	FBgn0035131	mthl9	FBgn0035648	CG13288	FBgn0034552	CG17999	FBgn0083941	CG34105	FBgn0052069	CG32069	FBgn0036608	CG13040	FBgn0036952	CG6933	FBgn0039114	Lsd-1	FBgn0005634	zip	FBgn0034796	CG3700	FBgn0035290	CG1887	FBgn0262566	CG43106	FBgn0262946	CG43265	FBgn0035473	mge	FBgn0052085	CG32085	FBgn0051769	CG31769
FBgn0001978	stc	FBgn0025674	CycK	FBgn0263050	CG43345	FBgn0033454	CG1671	FBgn0259211	grh	FBgn0034059	CG8320	FBgn0085219	CG34190	FBgn0036433	CG9628	FBgn0036112	CG14147	FBgn0085296	CG34267	FBgn0052406	CG32406	FBgn0034553	CG9993	FBgn0034900	CG12491	FBgn0036135	mRpL2	FBgn0042137	CG18814	FBgn0036953	CG17145	FBgn0039151	CG13607	FBgn0085732	CR40190	FBgn0261584	CG42694	FBgn0000543	ecd	FBgn0262123	l(2)41Ab	FBgn0034128	CG4409	FBgn0004910	Eip63F-1	FBgn0262291	mir-956	FBgn0261529	ms(2)34Fe
FBgn0027559	Pol32	FBgn0083973	CG34137	FBgn0026577	CG8677	FBgn0033458	CG18446	FBgn0040465	Dip3	FBgn0034061	CG8386	FBgn0085220	CG34191	FBgn0259175	ome	FBgn0036117	CG6321	FBgn0085297	CG34268	FBgn0086611	Lcp65Ag3	FBgn0034558	CG9236	FBgn0034911	CG5549	FBgn0014368	nol	FBgn0036717	CG13731	FBgn0260393	CG17147	FBgn0039154	Npc2f	FBgn0043842	Yeti	FBgn0034854	CG3493	FBgn0010909	msn	FBgn0085638	CG41378	FBgn0053458	CG33458	FBgn0004911	Eip63F-2	FBgn0262401	mir-285	FBgn0028531	CG15286
FBgn0259982	l(2)35Cc	FBgn0032979	CG1832	FBgn0021856	l(2)k14505	FBgn0033459	CG12744	FBgn0261619	pAbp	FBgn0034065	Rrp42	FBgn0034177	CG6796	FBgn0053257	CG33257	FBgn0036121	CG6310	FBgn0263039	CR43334	FBgn0020637	Lcp65Ag2	FBgn0034602	Lapsyn	FBgn0034915	eIF6	FBgn0052074	CG32074	FBgn0036749	CG7460	FBgn0036996	mag	FBgn0019952	Orct	FBgn0085638	CG41378	FBgn0040660	CG13551	FBgn0035385	FR	FBgn0260995	CG42596	FBgn0034133	CG7813	FBgn0052260	CG32260	FBgn0022709	Adk1	FBgn0028844	CG15283
FBgn0002524	lace	FBgn0040009	CG17490	FBgn0032938	CG8671	FBgn0033466	Pal1	FBgn0260401	MED9	FBgn0083983	mRpL34	FBgn0034184	CG9646	FBgn0036621	roq	FBgn0036139	CG6216	FBgn0035147	Gale	FBgn0020638	Lcp65Ag1	FBgn0027073	CG4302	FBgn0261794	kcc	FBgn0036138	CG14143	FBgn0052191	CG32191	FBgn0037067	Cpr78Ca	FBgn0039178	CG6356	FBgn0035099	CG6845	FBgn0034860	CG9812	FBgn0035390	scramb2	FBgn0052475	mthl8	FBgn0034135	Syn2	FBgn0003710	tipE	FBgn0036273	CG10426	FBgn0250844	CG4218
FBgn0010382	CycE	FBgn0040011	CG17494	FBgn0032949	Lamp1	FBgn0033471	CG12134	FBgn0000658	fj	FBgn0029175	Ext2	FBgn0261642	mbl	FBgn0261799	dsx-c73A	FBgn0036147	Plod	FBgn0035157	CG13894	FBgn0020642	Lcp65Ac	FBgn0034605	CG15661	FBgn0034940	CG16787	FBgn0036173	CG7394	FBgn0052195	CG32195	FBgn0037070	CG11309	FBgn0045980	niki	FBgn0052476	mthl14	FBgn0034861	CG9815	FBgn0035392	CG1271	FBgn0035099	CG6845	FBgn0085486	CG34457	FBgn0035505	Teh2	FBgn0036278	GRHRII	FBgn0028913	CG3473
FBgn0028507	CG3793	FBgn0041004	CG17715	FBgn0032955	CG2201	FBgn0033474	CG1407	FBgn0027835	Dp1	FBgn0034083	lbk	FBgn0022029	l(2)k01209	FBgn0036725	CG18265	FBgn0036177	CG33268	FBgn0035187	Trh	FBgn0004513	Mdr65	FBgn0086023	snoRNA:Me28S-A2589a	FBgn0029105	alpha-catenin-related	FBgn0036176	CG7377	FBgn0052196	CG32196	FBgn0037083	CG5656	FBgn0262722	CG43166	FBgn0035132	mthl10	FBgn0000241	bw	FBgn0035398	Cht7	FBgn0262109	CR42862	FBgn0050463	CG30463	FBgn0040697	Teh3	FBgn0052103	CG32103	FBgn0000055	Adh
FBgn0001990	wek	FBgn0058005	CG40005	FBgn0022893	Df31	FBgn0013435	cdc2rk	FBgn0034360	CG10927	FBgn0015754	Lis-1	FBgn0034224	CG6520	FBgn0036749	CG7460	FBgn0036196	CG11658	FBgn0035192	CG9194	FBgn0004619	Glu-RI	FBgn0034638	CG10433	FBgn0034951	CG3860	FBgn0086254	CG6084	FBgn0052198	CG32198	FBgn0037090	Est-Q	FBgn0039238	CG7016	FBgn0023000	mth	FBgn0050181	CG30181	FBgn0026189	prominin-like	FBgn0024806	DIP2	FBgn0034156	CG5348	FBgn0035538	DopEcR	FBgn0052121	CG32121	FBgn0260953	CG42585
FBgn0041627	Ku80	FBgn0000384	cta	FBgn0032956	Cul-2	FBgn0033485	RpLP0-like	FBgn0050122	CG30122	FBgn0034087	clu	FBgn0034230	CG4853	FBgn0052187	CG32187	FBgn0259140	CG42255	FBgn0035199	CG9134	FBgn0035710	SP1173	FBgn0262888	CG43243	FBgn0022708	Adk2	FBgn0036210	CG14130	FBgn0036806	Cyp12c1	FBgn0052448	CG32448	FBgn0039239	CG13641	FBgn0035146	CG13893	FBgn0041233	Gr59e	FBgn0035425	CG17746	FBgn0027111	miple	FBgn0053544	Vkor	FBgn0035543	CG15020	FBgn0086708	stv	FBgn0028870	CG4691
FBgn0000182	BicC	FBgn0039958	CG12567	FBgn0003866	tsh	FBgn0033486	CG11866	FBgn0023214	edl	FBgn0028424	JhI-26	FBgn0263197	Patronin	FBgn0036773	CG13698	FBgn0036220	CG5897	FBgn0013342	n-syb	FBgn0035719	tow	FBgn0259708	CG42362	FBgn0034968	RpL12	FBgn0036211	CG5946	FBgn0036820	CG6852	FBgn0037166	CG11426	FBgn0039241	CG11089	FBgn0035165	CG13887	FBgn0041234	Gr59f	FBgn0035436	CG12016	FBgn0029002	miple2	FBgn0034159	CG15615	FBgn0000038	nAcRbeta-64B	FBgn0026376	Rgl	FBgn0028838	CSN1a
FBgn0002673	twe	FBgn0262115	CG17683	FBgn0032979	CG1832	FBgn0033491	CG18011	FBgn0034392	MFS15	FBgn0050096	CG30096	FBgn0085223	CG34194	FBgn0036780	CG7330	FBgn0036235	CG6938	FBgn0035255	RabX5	FBgn0035733	CG8641	FBgn0034662	CG13492	FBgn0021875	Zfrp8	FBgn0036225	CG5883	FBgn0036824	CG3902	FBgn0010225	Gel	FBgn0039299	CG11854	FBgn0261914		FBgn0034894	CG4091	FBgn0052268	dro6	FBgn0052845	CG32845	FBgn0085488	CG34459	FBgn0035544	CG15021	FBgn0001216	Hsc70-1	FBgn0028868	CG4701
FBgn0028897	CG4935	FBgn0262117	IntS3	FBgn0040010	CG17493	FBgn0033507	CG12909	FBgn0014269	prod	FBgn0034138	RpS15	FBgn0016059	Sema-1b	FBgn0036781	CG13699	FBgn0250876	Sema-5c	FBgn0035265	CG18173	FBgn0010387	Dbi	FBgn0085399	CG34370	FBgn0019643	Dat	FBgn0036226	CG7252	FBgn0036857	CG9629	FBgn0085334	CG34305	FBgn0039311	CG10513	FBgn0004431	LysX	FBgn0034909	CG4797	FBgn0010381	Drs	FBgn0259744		FBgn0025833	CG8910	FBgn0035554	CG13721	FBgn0013563	Pex1	FBgn0250834	CG33308
FBgn0040079	pkaap	FBgn0046692	Stlk	FBgn0032997	CG17486	FBgn0262114	RanBPM	FBgn0041702	CG15107	FBgn0034139	CG4927	FBgn0027872	rdgBbeta	FBgn0086661	snoRNA:Psi28S-2566	FBgn0260941	app	FBgn0027790	GV1	FBgn0040837	CG8620	FBgn0034709	Swim	FBgn0260770	CG42568	FBgn0036233		FBgn0036871	CG14096	FBgn0086608	CG34112	FBgn0051102	CG31102	FBgn0035236	CG12004	FBgn0034914	CG5554	FBgn0035444	CG12012	FBgn0023000	mth	FBgn0262513	Vha16-4	FBgn0014073	Tie	FBgn0086690	cp309	FBgn0261568	CG42682
FBgn0028895	CG17328	FBgn0250830	CG12547	FBgn0053554	Nipped-A	FBgn0033527	CG11777	FBgn0034422	CG7137	FBgn0003274	RpLP2	FBgn0045800	Uhg1	FBgn0036825	RpL26	FBgn0036274	CG4328	FBgn0035287	CG13937	FBgn0035756	unc-13-4A	FBgn0034718	wdp	FBgn0034985	CG3328	FBgn0004926	eIF-2beta	FBgn0052214	CG32214	FBgn0262605	CG43131	FBgn0051370	CG31370	FBgn0035248	CG13919	FBgn0005612	Sox14	FBgn0035445	CG12014	FBgn0035140	CG17180	FBgn0034177	CG6796	FBgn0260657	CG42540	FBgn0036542	pHCl	FBgn0032553	CG4480
FBgn0028525	c(2)M	FBgn0261387	CG17528	FBgn0033015	d4	FBgn0033528	trsn	FBgn0004003	wbl	FBgn0034168	CG15614	FBgn0063382	snoRNA:U29:54Ed	FBgn0036899	tey	FBgn0036287	CG10663	FBgn0261723	Dbx	FBgn0035770	pst	FBgn0034723	CG13506	FBgn0034986	mRpS17	FBgn0085271	CG34242	FBgn0052208	825-Oak	FBgn0037440	CG1041	FBgn0039323	CG10559	FBgn0035251	CG7967	FBgn0034958	CG3907	FBgn0005640	Eip63E	FBgn0035144	CG17181	FBgn0034182	CG9640	FBgn0035575	CG7509	FBgn0036541	CG12486	FBgn0032554	CG15278
FBgn0011708	Syx5	FBgn0033000	CG14464	FBgn0033017	CG10465	FBgn0263102	psq	FBgn0003254	rib	FBgn0085219	CG34190	FBgn0022740	HLH54F	FBgn0261341	verm	FBgn0036288	CG10660	FBgn0035313	CG13810	FBgn0035779	CG8562	FBgn0034733	CG4752	FBgn0026169	snoRNA:Psi18S-1820	FBgn0036300	CG10688	FBgn0036872	CG12519	FBgn0037465	CG1105	FBgn0051439	Muc96D	FBgn0035283	CG12024	FBgn0011726	tsr	FBgn0035452	CG10359	FBgn0025676	CkIIalpha-i3	FBgn0034183	CG9642	FBgn0052232	CG32232	FBgn0036560	CG5895	FBgn0013300	Mst35Ba
FBgn0000250	cact	FBgn0033005	CG3107	FBgn0033019	CG10395	FBgn0033539	Git	FBgn0034430	mip40	FBgn0085220	CG34191	FBgn0261362	proPO-A1	FBgn0260653	serp	FBgn0036289	CG10657	FBgn0035325	CG13806	FBgn0259935	CG42458	FBgn0050195	CG30195	FBgn0050418	nord	FBgn0036334	CG11267	FBgn0036873	CG18294	FBgn0014863	Mlp84B	FBgn0039428	CG14237	FBgn0035300	CG1139	FBgn0025806	Rap2l	FBgn0035468	Gr63a	FBgn0035160	CG13897	FBgn0034202	CG17287	FBgn0035603	CG10635	FBgn0052154		FBgn0013301	Mst35Bb
FBgn0014092	CG4278	FBgn0026238	gus	FBgn0033021	CG10417	FBgn0033548	CG7637	FBgn0040273	Spt5	FBgn0026402	NiPp1	FBgn0040465	Dip3	FBgn0262393	mir-33	FBgn0036319	Ent3	FBgn0035331	DmsR-1	FBgn0035785	CG8546	FBgn0034755	CG3746	FBgn0000037	mAcR-60C	FBgn0036335	mRpL20	FBgn0052213	CG32213	FBgn0051496	CG31496	FBgn0051072	Lerp	FBgn0035312	CG15820	FBgn0034989	CG3356	FBgn0003943	Ubi-p63E	FBgn0035167	Gr61a	FBgn0034205	CG10950	FBgn0085447	sif	FBgn0036584	CG13054	FBgn0259965	Sfp35C
FBgn0261278	grp	FBgn0033015	d4	FBgn0261429	CR42646	FBgn0033549	mms4	FBgn0034476	Toll-7	FBgn0034179	CG6805	FBgn0083054	snoRNA:Psi18S-1347a	FBgn0013799	Deaf1	FBgn0023095	caps	FBgn0035338	CG13800	FBgn0035797	CG14837	FBgn0260768	CG42566	FBgn0010414	SerT	FBgn0040813	Nplp2	FBgn0036876	CG9451	FBgn0015575	alpha-Est7	FBgn0003267	ro	FBgn0052304	obst-I	FBgn0034990	CG11406	FBgn0035478	CG10853	FBgn0035168	CG13889	FBgn0262882	CG43237	FBgn0035657	alphaKap4	FBgn0036588	CG13068	FBgn0263089	CR43357
FBgn0002652	squ	FBgn0261403	sxc	FBgn0033029	l(2)NC136	FBgn0033556	CG12343	FBgn0004364	18w	FBgn0024196	robl	FBgn0083053	snoRNA:Psi18S-1347b	FBgn0020389	Papss	FBgn0260049	flr	FBgn0035358	CG14949	FBgn0041156	exex	FBgn0034768	Obp58b	FBgn0035002	CG3419	FBgn0036350	CG14111	FBgn0260653	serp	FBgn0015572	alpha-Est4	FBgn0051075	CG31075	FBgn0052302	CG32302	FBgn0034996	CG13575	FBgn0035480	CG14984	FBgn0035171	CG12502	FBgn0034206	CG18469	FBgn0020765	Acp65Aa	FBgn0085277	CG34248	FBgn0262875	CG43230
FBgn0051782		FBgn0033017	CG10465	FBgn0033039	gp210	FBgn0033557	CG12325	FBgn0034523	Nnf1a	FBgn0034224	CG6520	FBgn0086600	snoRNA:Psi18S-1347c	FBgn0052227	gogo	FBgn0036377	CG10710	FBgn0035360	CG1246	FBgn0035903	CG6765	FBgn0034769	Obp58c	FBgn0035006	CG4563	FBgn0036351	CG14107	FBgn0262393	mir-33	FBgn0015570	alpha-Est2	FBgn0051076	CG31076	FBgn0044452	Atg2	FBgn0034997	CG3376	FBgn0024179	wit	FBgn0035173	CG13907	FBgn0262568	CG43108	FBgn0035686	Cpr65Az	FBgn0036589	CG13067	FBgn0261268	Cul-3
FBgn0032596	CG17331	FBgn0033019	CG10395	FBgn0025458		FBgn0033562		FBgn0015907	bl	FBgn0034232	CG4866	FBgn0027835	Dp1	FBgn0036979	CG13247	FBgn0262350		FBgn0035364		FBgn0035929	CG13311	FBgn0034770	Obp58d	FBgn0035010	CG13579	FBgn0036361	CG10154	FBgn0036909	CG15881	FBgn0015568	alpha-Est1	FBgn0039473	CG17191	FBgn0035409	CG14963	FBgn0005638	slbo	FBgn0035501	CG1299	FBgn0054056	CG34056	FBgn0261642	mbl	FBgn0262985	CG43293	FBgn0036590	CG13065	FBgn0028853	CG15263
FBgn0015391	glu	FBgn0033021	CG10417	FBgn0002774	mle	FBgn0050020	CG30020	FBgn0034534	maf-S	FBgn0085223	CG34194	FBgn0034345	CG5174	FBgn0037014	CG13251	FBgn0043550	Tsp68C	FBgn0263177		FBgn0085455	CG34426	FBgn0259145	CG42260	FBgn0016687	Nurf-38	FBgn0036362	CG10725	FBgn0036947	obst-F	FBgn0042102	CG18745	FBgn0039474	CG6283	FBgn0035412	CG14957	FBgn0002787	Mov34	FBgn0035539	slow	FBgn0035176	CG13905	FBgn0034218	CG18467	FBgn0047000	pncr008:3L	FBgn0250814	CG4169	FBgn0028850	CG15260
FBgn0261068	LSm7	FBgn0027507	CG1344	FBgn0004603	Src42A	FBgn0033571	Rpb5	FBgn0011674	insc	FBgn0034258	eIF3-S8	FBgn0034354	CG5224	FBgn0037044	CG10585	FBgn0052132		FBgn0035371	CG9977	FBgn0035934	TrpA1	FBgn0050274	CG30274	FBgn0259707	CG42361	FBgn0036422	CG3868	FBgn0036951	CG7017	FBgn0042105	CG18748	FBgn0039475	CG6277	FBgn0263246	CG43389	FBgn0019886	Letm1	FBgn0035553	CG13722	FBgn0035179	CG12038	FBgn0022987	qkr54B	FBgn0035730	CG17744	FBgn0036659	CG9701	FBgn0011239	ms(2)35Ci
FBgn0022213	Cas	FBgn0259978	vlc	FBgn0033059	CG7845	FBgn0040765	luna	FBgn0034564	CG9344	FBgn0085224	CG34195	FBgn0023214	edl	FBgn0037094	CG7611	FBgn0036382	CG13737	FBgn0035379	spz5	FBgn0043806	CG32032	FBgn0050265	CG30265	FBgn0035040	CG4741	FBgn0036427	CG4613	FBgn0036977	CG5665	FBgn0037518	CG2641	FBgn0039476	CG6271	FBgn0262368	mir-282	FBgn0035023	itp	FBgn0052243	CG32243	FBgn0004870	bab1	FBgn0034272	Ir54a	FBgn0261537	CG42661	FBgn0036665	CG13024	FBgn0032563	CG15258
FBgn0051739	CG31739	FBgn0033039	gp210	FBgn0033060	CG7849	FBgn0033581	CG12391	FBgn0001133	grau	FBgn0022740	HLH54F	FBgn0034392	MFS15	FBgn0037099	CG7173	FBgn0036433	CG9628	FBgn0035398	Cht7	FBgn0004244	Rdl	FBgn0034782	CG12490	FBgn0035041	CG13594	FBgn0026409	Mpcp	FBgn0036992	CG11796	FBgn0042101	CG18744	FBgn0039482	CG14258	FBgn0035427	ckd	FBgn0035065	CG3589	FBgn0035578	CG13707	FBgn0035207	CG9153	FBgn0034278	CG14488	FBgn0035800	CG7716	FBgn0261565	Lmpt	FBgn0028892	CG4161
FBgn0032635	CG15141	FBgn0025458		FBgn0033062	Ars2	FBgn0085253	CG34224	FBgn0034572	CG9346	FBgn0261362	proPO-A1	FBgn0034408	sano	FBgn0053292		FBgn0259175	ome	FBgn0052280	CG32280	FBgn0028431		FBgn0034783	CG9825	FBgn0035044	CG3663	FBgn0259175	ome	FBgn0036997	CG5955	FBgn0037548	CG7900	FBgn0243514	eater	FBgn0035438	PHGPx	FBgn0015801	Reg-5	FBgn0040842	CG15212	FBgn0035211	CG2211	FBgn0259211	grh	FBgn0035805	CG7506	FBgn0052170	CG32170	FBgn0020371	Tim17b2
FBgn0260632	dl	FBgn0033055	tbce	FBgn0050431	CG30431	FBgn0041174	Vhl	FBgn0003391	shg	FBgn0040465	Dip3	FBgn0010434	cora	FBgn0037130	Syn1	FBgn0259099	DCX-EMAP	FBgn0053160	CG33160	FBgn0040305	MTF-1	FBgn0034819	CG9877	FBgn0035050	ST6Gal	FBgn0036467	CG12310	FBgn0037057	CG10512	FBgn0051464	CG31464	FBgn0040609	CG3348	FBgn0052274	Drs-l	FBgn0050423	CG30423	FBgn0040843	CG15213	FBgn0003295	ru	FBgn0050323	CG30323	FBgn0035816	CG13685	FBgn0036680	Cpr73D	FBgn0259922	CG42448
FBgn0000183	BicD	FBgn0033059	CG7845	FBgn0086655	jing	FBgn0033609	fbl6	FBgn0011824	CG4038	FBgn0261619	pAbp	FBgn0004003	wbl	FBgn0037153	olf413	FBgn0036466	CG18581	FBgn0052270	CG32270	FBgn0036013	CG14177	FBgn0034828	CG13545	FBgn0053988	CG33988	FBgn0065051	snoRNA:MeU5-U42	FBgn0012034	AcCoAS	FBgn0051463	CG31463	FBgn0039519	Cyp6a18	FBgn0010381	Drs	FBgn0060296	pain	FBgn0035612	CG10625	FBgn0052320	CG32320	FBgn0011589	elk	FBgn0010350	CdsA	FBgn0010352	Nc73EF	FBgn0028880	CG15256
FBgn0024689	fws	FBgn0033062	Ars2	FBgn0042085	Bap170	FBgn0033615	CG7741	FBgn0015721	king-tubby	FBgn0083053	snoRNA:Psi18S-1347b	FBgn0034438	CG9416	FBgn0004449	Ten-m	FBgn0036481	CG16959	FBgn0086069	snoRNA:Me28S-C3351	FBgn0053696	CG33696	FBgn0085401		FBgn0040666	CG12848	FBgn0036488	CG6878	FBgn0027945	ppl	FBgn0062412	Ctr1B	FBgn0039543	CG12428	FBgn0035444	CG12012	FBgn0050424	CG30424	FBgn0035623	mthl2	FBgn0053971	Ir62a	FBgn0050325	CG30325	FBgn0035844	CG13676	FBgn0011293	a10	FBgn0028950	CG15255
FBgn0032643	CG6453	FBgn0262867	Ptr	FBgn0033081	geminin	FBgn0082585	sprt	FBgn0002736	mago	FBgn0086600	snoRNA:Psi18S-1347c	FBgn0004873		FBgn0037164	CG11438	FBgn0036485	FucTA	FBgn0035432	ZnT63C	FBgn0036043	CG8177	FBgn0025334	PHDP	FBgn0035063	Eap	FBgn0040805	CG12355	FBgn0037067	Cpr78Ca	FBgn0037601	Cyp313b1	FBgn0262588	CG43125	FBgn0035449	CG14971	FBgn0005634	zip	FBgn0263106	DnaJ-1	FBgn0035246	CG13928	FBgn0050110	CG30110	FBgn0035845	CG13675	FBgn0040793	CG7630	FBgn0028944	CG11864
FBgn0032644	CG5131	FBgn0033072	CG17994	FBgn0000054	Adf1	FBgn0001269	inv	FBgn0050390	Sgf29	FBgn0000658	fj	FBgn0020440	Fak56D	FBgn0037223	TwdlU	FBgn0004228	mex1	FBgn0014388	sty	FBgn0025866	CalpB	FBgn0261794	kcc	FBgn0035064	CG16912	FBgn0004228	mex1	FBgn0037069	Cpr78Cc	FBgn0259992	CG42489	FBgn0262587	CG43124	FBgn0035452	CG10359	FBgn0050428	CG30428	FBgn0020641	Lcp65Ad	FBgn0035251	CG7967	FBgn0034352	CG17669	FBgn0035865	CG7201	FBgn0036726	CG7603	FBgn0001989	l(2)35Di
FBgn0003187	qua	FBgn0042085	Bap170	FBgn0033089	CG17266	FBgn0000577	en	FBgn0016726	RpL29	FBgn0261700	CG42736	FBgn0082987	snoRNA:Psi28S-2444	FBgn0037224	TwdlF	FBgn0053983	obst-H	FBgn0262260	mir-2282	FBgn0085385	CG34356	FBgn0029105	alpha-catenin-related	FBgn0022343	CG3760	FBgn0053986	CG33986	FBgn0037078	CG12971	FBgn0085330	CG34301	FBgn0085465	CG34436	FBgn0263239	dar1	FBgn0003256	rl	FBgn0035691	CG7386	FBgn0035260	CG7991	FBgn0034364	CG5493	FBgn0262361	CG43059	FBgn0036727	CG7589	FBgn0051826	CG31826
FBgn0032656	CG5674	FBgn0033081	geminin	FBgn0259483	Mob4	FBgn0033636	tou	FBgn0034631	CG10496	FBgn0013983	imd	FBgn0260934	par-1	FBgn0051531		FBgn0036544	sff	FBgn0052266	CG32266	FBgn0052054	CG32054	FBgn0034951	CG3860	FBgn0035083	Tina-1	FBgn0261682	CG42729	FBgn0037100	capaR	FBgn0040532	CG8369	FBgn0085466	CG34437	FBgn0035469	CG14977	FBgn0043842	Yeti	FBgn0035692	CG13298	FBgn0035282	CG13936	FBgn0034372	Gint3	FBgn0250833	CG34461	FBgn0036728	CG7580	FBgn0028901	CG18109
FBgn0032688	CG15160	FBgn0013732	sced	FBgn0014009	Rab2	FBgn0086658	snoRNA:Psi28S-1180	FBgn0034654	CG10306	FBgn0034350	CG5189	FBgn0034476	Toll-7	FBgn0027570	Nep2	FBgn0036592	CG13049	FBgn0064227	Rdh	FBgn0262008	CG42826	FBgn0034958	CG3907	FBgn0002607	RpL19	FBgn0036515	CG12304	FBgn0262417		FBgn0037672	sage	FBgn0082958	snoRNA:Psi28S-3405c	FBgn0004910	Eip63F-1	FBgn0085638	CG41378	FBgn0260660	mp	FBgn0262110	CG42863	FBgn0053136	CG33136	FBgn0085491	CG34462	FBgn0000567	Eip74EF	FBgn0028903	CG13243
FBgn0015553	tos	FBgn0027066	Eb1	FBgn0027066	Eb1	FBgn0260932	cuff	FBgn0010228	HmgZ	FBgn0034354	CG5224	FBgn0034486	CG13869	FBgn0001311	kkv	FBgn0036593	CG13048	FBgn0035477	CG14982	FBgn0036099	CG11811	FBgn0022708	Adk2	FBgn0035092	Nplp1	FBgn0085481	CG34452	FBgn0037127	CG14566	FBgn0037678	CG16749	FBgn0039670	CG7567	FBgn0035499	Chd64	FBgn0035101	p130CAS	FBgn0035737	Cpr65Ec	FBgn0035299	CG11815	FBgn0034377	CG15071	FBgn0035875	Cpr66Cb	FBgn0036742	CG7497	FBgn0028902	Tektin-A
FBgn0005617	msl-1	FBgn0033104	CG15237	FBgn0033104	CG15237	FBgn0026573	CG8290	FBgn0004362	HmgD	FBgn0034360	CG10927	FBgn0034500	CG11200	FBgn0010051	Itp-r83A	FBgn0036594	CG13047	FBgn0035490	CG1136	FBgn0053500	CG33500	FBgn0050172	CG30172	FBgn0262679	CG43149	FBgn0011016	SsRbeta	FBgn0037131	CG14564	FBgn0037683	CG18473	FBgn0039671	CG11470	FBgn0035501	CG1299	FBgn0052476	mthl14	FBgn0023001	melt	FBgn0000543	ecd	FBgn0034391	CG15080	FBgn0035888	CG7120	FBgn0036756	cln3	FBgn0028935	CG7653
FBgn0032698	CG10336	FBgn0033122	CG17002	FBgn0022224	ubl	FBgn0004463	RpIII128	FBgn0025186	ari-2	FBgn0034361	mRpS28	FBgn0034520	lms	FBgn0023023	CRMP	FBgn0036596	CG13045	FBgn0035495	CG14989	FBgn0053272	CG33272	FBgn0034971	CG3209	FBgn0025592	Gyk	FBgn0036596	CG13045	FBgn0037167	CG11425	FBgn0037684	CG8129	FBgn0039685	Obp99b	FBgn0259986	nab	FBgn0024806	DIP2	FBgn0035767	CG8596	FBgn0259199	CG42303	FBgn0034396	CG15097	FBgn0086348	se	FBgn0001134	Grd	FBgn0051735	CG31735
FBgn0032700	CG10338	FBgn0033155	Br140	FBgn0033117	CG3358	FBgn0086677	jeb	FBgn0034716	Oatp58Dc	FBgn0023214	edl	FBgn0034530	Rcd6	FBgn0037351	RpL13A	FBgn0036601	CG13063	FBgn0035498	Fit1	FBgn0053271	CG33271	FBgn0034972	CG10339	FBgn0035122	mRpL17	FBgn0260460	mRpS34	FBgn0037181	CG11370	FBgn0037743	CG8412	FBgn0262112	sro	FBgn0041630	Hexo1	FBgn0052845	CG32845	FBgn0035772	Sh3beta	FBgn0052846	CG32846	FBgn0262479	CG43069	FBgn0262508	CG43078	FBgn0036762	CG7430	FBgn0032577	CG13244
FBgn0032703	CG10343	FBgn0260991	Incenp	FBgn0260991	Incenp	FBgn0027504	CG8878	FBgn0053200	ventrally-expressed-protein-D	FBgn0034392	MFS15	FBgn0015524	otp	FBgn0086051	snoRNA:Me28S-U2134a	FBgn0036605	CG13041	FBgn0004574	Rop	FBgn0053270	CG33270	FBgn0050419	CG30419	FBgn0052483	CG32483	FBgn0042137	CG18814	FBgn0054031	CG34031	FBgn0037779	CG12811	FBgn0039714	CG7816	FBgn0035528	CG15012	FBgn0035132	mthl10	FBgn0014011	Rac2	FBgn0004372	aly	FBgn0262480	CG43070	FBgn0017429	CG5989	FBgn0000568	Eip75B	FBgn0028857	CG12448
FBgn0025608	Faf	FBgn0000352	cos	FBgn0033159	Dscam	FBgn0033688	Prp8	FBgn0022984	qkr58E-3	FBgn0034408	sano	FBgn0020617	Rx	FBgn0037374	jagn	FBgn0036606	CG13060	FBgn0003206	Ras64B	FBgn0263247	CG43390	FBgn0050418	nord	FBgn0082973	snoRNA:Psi28S-3308	FBgn0036622	CG4753	FBgn0058002	CG40002	FBgn0037782	Npc2d	FBgn0003357	Jon99Ciii	FBgn0035529	CG1319	FBgn0023000	mth	FBgn0035791	CG8539	FBgn0035390	scramb2	FBgn0034423	CG7229	FBgn0052029	Cpr66D	FBgn0003997	W	FBgn0028858	CG10839
FBgn0032705	Grip71	FBgn0033160	CG11107	FBgn0000352	cos	FBgn0023167	SmD3	FBgn0034736	CG6018	FBgn0034422	CG7137	FBgn0034570	CG10543	FBgn0051559	CG31559	FBgn0040795	CG13038	FBgn0003710	tipE	FBgn0263248	CG43391	FBgn0000037	mAcR-60C	FBgn0083058	snoRNA:Psi18S-1086	FBgn0260960	Baldspot	FBgn0037222	CG14642	FBgn0037783	Npc2c	FBgn0003356	Jon99Cii	FBgn0035540	Syx17	FBgn0035142	hipk	FBgn0035795	CG16998	FBgn0026189	prominin-like	FBgn0050127	CG30127	FBgn0040828	CG13306	FBgn0036817	CG6865	FBgn0085196	CG34167
FBgn0027070	CG17322	FBgn0033162	CG1707	FBgn0033160	CG11107	FBgn0033691	CG8860	FBgn0034743	RpS16	FBgn0004003	wbl	FBgn0050394	CG30394	FBgn0037409	Osi24	FBgn0036610	CG13058	FBgn0035504	Teh4	FBgn0053269	CG33269	FBgn0010414	SerT	FBgn0035170	dpr20	FBgn0036678	CG11905	FBgn0085334	CG34305	FBgn0037786	CG5361	FBgn0039742	CG15528	FBgn0052423	shep	FBgn0035146	CG13893	FBgn0035806	PGRP-SD	FBgn0052283	dro3	FBgn0085226		FBgn0261259	Fhos	FBgn0036821	CG3961	FBgn0045827	CG13245
FBgn0032717	CG10600	FBgn0033166	Eaf	FBgn0033169	CG11123	FBgn0033693	CG13175	FBgn0034748	CG17807	FBgn0003254	rib	FBgn0082972	snoRNA:Psi28S-3316a	FBgn0037413	Osi5	FBgn0036612	CG4998	FBgn0035511	Cpr64Ab	FBgn0052091	CG32091	FBgn0035006	CG4563	FBgn0035187	Trh	FBgn0036749	CG7460	FBgn0037239	CG11739	FBgn0037817	Cyp12e1	FBgn0051028	CG31028	FBgn0016031	lama	FBgn0035165	CG13887	FBgn0052368	CG32368	FBgn0035437	CG11526	FBgn0034456	Ir56b	FBgn0035932	CG13308	FBgn0036834	CG6836	FBgn0051820	CG31820
FBgn0032721	CG10602	FBgn0033169	CG11123	FBgn0033178	CG11127	FBgn0083989	snoRNA:Me28S-C3420b	FBgn0034750	CG3732	FBgn0034430	mip40	FBgn0082971	snoRNA:Psi28S-3316b	FBgn0027527	Osi6	FBgn0010424	TpnC73F	FBgn0035513	Cpr64Ad	FBgn0036223	CG14126	FBgn0035041	CG13594	FBgn0063667	CG32335	FBgn0036774	mRpS26	FBgn0037250	CG1074	FBgn0022359	Sodh-2	FBgn0039760	CG9682	FBgn0035623	mthl2	FBgn0035173	CG13907	FBgn0026263	bip1	FBgn0035445	CG12014	FBgn0003435	sm	FBgn0035943	CG5653	FBgn0036844	Mkp3	FBgn0028884	CG4892
FBgn0032723	ssp3	FBgn0033177	CG11141	FBgn0259745	wech	FBgn0083988	snoRNA:Me28S-C3420a	FBgn0261596	RpS24	FBgn0034438	CG9416	FBgn0086669	snoRNA:Psi18S-841a	FBgn0037414	Osi7	FBgn0036698	CG7724	FBgn0035543	CG15020	FBgn0036229	CG7248	FBgn0035043	CG4781	FBgn0035189	CG9119	FBgn0052195	CG32195	FBgn0037251	CG9804	FBgn0026315	Ugt35a	FBgn0015222	Fer1HCH	FBgn0035631	Txl	FBgn0261914		FBgn0035844	CG13676	FBgn0259224	CG42324	FBgn0034461	CG15124	FBgn0011206	bol	FBgn0036851	CG14082	FBgn0085197	CG34168
FBgn0032724	CG10428	FBgn0033178	CG11127	FBgn0263240	Coop	FBgn0010238	Lac	FBgn0005631	robo	FBgn0004873		FBgn0082963	snoRNA:Psi28S-3378	FBgn0037417	Osi10	FBgn0036711	CG13727	FBgn0035545	CG12607	FBgn0028573	prc	FBgn0028738	ETH	FBgn0004427	LysD	FBgn0036780	CG7330	FBgn0037354	CG12171	FBgn0040250	Ugt86Dj	FBgn0015221	Fer2LCH	FBgn0035632	Ppat-Dpck	FBgn0004431	LysX	FBgn0035849	ERR	FBgn0001254	ImpE2	FBgn0262824	CG43195	FBgn0052036	CG32036	FBgn0020277	lush	FBgn0028893	CG31819
FBgn0015772	Nak	FBgn0259745	wech	FBgn0015929	dpa	FBgn0033741	CG8545	FBgn0050272	CG30272	FBgn0013325	RpL11	FBgn0083017	snoRNA:Psi18S-841c	FBgn0037421	CG15594	FBgn0086080	snoRNA:Me28S-A576	FBgn0035546	CG11345	FBgn0036235	CG6938	FBgn0035083	Tina-1	FBgn0004428	LysE	FBgn0036781	CG13699	FBgn0051548	CG31548	FBgn0037913	fabp	FBgn0039778	Jon99Fi	FBgn0260936	scny	FBgn0052333	CG32333	FBgn0035856	CG13679	FBgn0035468	Gr63a	FBgn0261580	CG42690	FBgn0036044	CG14168	FBgn0036891	CG9372	FBgn0028899	CG31817
FBgn0032730	CG10431	FBgn0033185	CG1603	FBgn0033185	CG1603	FBgn0033744	Dh44-R2	FBgn0034795	MED23	FBgn0082987	snoRNA:Psi28S-2444	FBgn0083016	snoRNA:Psi18S-841d	FBgn0040279	Osi14	FBgn0036769	Tsp74F	FBgn0035548	CG15023	FBgn0027843	CAH2	FBgn0004055	uzip	FBgn0035244	ABCB7	FBgn0052196	CG32196	FBgn0037358	elm	FBgn0037934	CG6830	FBgn0026190	PH4alphaMP	FBgn0035663	CG6462	FBgn0262937	Rabex-5	FBgn0035859	CG13678	FBgn0035470	CG14980	FBgn0261581	CG42691	FBgn0044328	CG32052	FBgn0004623	Gbeta76C	FBgn0259151	CG42266
FBgn0032732	CG15168	FBgn0033186	CG1602	FBgn0004132	boca	FBgn0033751	CG8818	FBgn0010622	l(2)06496	FBgn0034476	Toll-7	FBgn0083046	snoRNA:Psi18S-1389a	FBgn0037424	Osi15	FBgn0036780	CG7330	FBgn0040699	CG15024	FBgn0036274	CG4328	FBgn0035092	Nplp1	FBgn0013342	n-syb	FBgn0052198	CG32198	FBgn0046878	Obp83cd	FBgn0037935	CG6834	FBgn0039798	CG11313	FBgn0035666	Jon65Aii	FBgn0086670	snoRNA:Psi28S-2622	FBgn0027569	cert	FBgn0024179	wit	FBgn0050447	CG30447	FBgn0052050		FBgn0005633	fln	FBgn0051816	CG31816
FBgn0032746	CG10470	FBgn0022772	Orc1	FBgn0261385	scra	FBgn0011592	fra	FBgn0003062	Fib	FBgn0010411	RpS18	FBgn0083045	snoRNA:Psi18S-1389b	FBgn0051561	Osi16	FBgn0036781	CG13699	FBgn0014073	Tie	FBgn0260945	Atg1	FBgn0035094	CG9380	FBgn0026372	RpL23A	FBgn0036820	CG6852	FBgn0046875	Obp83g	FBgn0038005	Cyp313a5	FBgn0039800	Npc2g	FBgn0259164	CG42269	FBgn0261243	Psa	FBgn0035868	CG7194	FBgn0052259	CG32259	FBgn0034478	CG10822	FBgn0085411	CG34382	FBgn0036939	CG7365	FBgn0032588	CG5968
FBgn0032748	CG10492	FBgn0050499	CG30499	FBgn0033210	U2A	FBgn0033754	Ak6	FBgn0085400	CG34371	FBgn0034500	CG11200	FBgn0034622	CG15666	FBgn0037427	Osi17	FBgn0001078	ftz-f1	FBgn0035577	CG13708	FBgn0261674	CG42709	FBgn0069969	CG40498	FBgn0035286	CG13924	FBgn0036824	CG3902	FBgn0037420	CG15597	FBgn0038006	Cyp313a2	FBgn0039817	CG15553	FBgn0035711	CG8519	FBgn0035236	CG12004	FBgn0087039	Sbp2	FBgn0259986	nab	FBgn0034491	CG11055	FBgn0085385	CG34356	FBgn0052225	CG32225	FBgn0051815	CG31815
FBgn0032750	CG10495	FBgn0004132	boca	FBgn0003317	sax	FBgn0022764	Sin3A	FBgn0015903	apt	FBgn0034520	lms	FBgn0010470	Fkbp13	FBgn0037428	Osi18	FBgn0036822	CG11637	FBgn0035583	CG13704	FBgn0036322		FBgn0085793	CR41510	FBgn0035298	CG1140	FBgn0036833	CG3819	FBgn0037440	CG1041	FBgn0038009	CG17738	FBgn0086917	spok	FBgn0041194	Prat2	FBgn0035248	CG13919	FBgn0035877	CG7083	FBgn0041630	Hexo1	FBgn0027529	CG8920	FBgn0052061	CG32061	FBgn0262057	Spn77Ba	FBgn0032590	CG4631
FBgn0032752	CG10702	FBgn0261385	scra	FBgn0050383	CG30383	FBgn0028683	spt4	FBgn0021895	ytr	FBgn0034534	maf-S	FBgn0260477	CG30283	FBgn0037430	Osi20	FBgn0036834	CG6836	FBgn0054047	CR34047	FBgn0036359	CG14105	FBgn0262124	uex	FBgn0035335	mRpL23	FBgn0036853	mRpL21	FBgn0004777	Ccp84Ag	FBgn0038037	Cyp9f2	FBgn0004648	svr	FBgn0035772	Sh3beta	FBgn0035251	CG7967	FBgn0035879	CG7112	FBgn0052243	CG32243	FBgn0034502	CG13871	FBgn0262592	CG43127	FBgn0037001	CG6020	FBgn0086907	Cyt-c-d
FBgn0086445	l(2)37Cd	FBgn0033199	CG17985	FBgn0003082	phr	FBgn0011604	Iswi	FBgn0024234	gbb	FBgn0011674	insc	FBgn0085397	Fili	FBgn0037447	Neurochondrin	FBgn0036836	CG11619	FBgn0035594	CG4597	FBgn0036367	CG10116	FBgn0262679	CG43149	FBgn0261602	RpL8	FBgn0036857	CG9629	FBgn0004778	Ccp84Af	FBgn0038038	CG5167	FBgn0000210	br	FBgn0063083	pncr015:3L	FBgn0027594	drpr	FBgn0053057	CG33057	FBgn0035571	CG12493	FBgn0034510	CG13426	FBgn0036093	CG14154	FBgn0259243	Pka-R1	FBgn0000409	Cyt-c-p
FBgn0086443	Aats-asn	FBgn0003733	tor	FBgn0023171	rnh1	FBgn0033766	CG8771	FBgn0025790	TBPH	FBgn0015524	otp	FBgn0034697	GM130	FBgn0037448	CG15186	FBgn0003089	pip	FBgn0040842	CG15212	FBgn0085429		FBgn0025592	Gyk	FBgn0035359	CG1143	FBgn0036861	CG14089	FBgn0004779	Ccp84Ae	FBgn0000455	Dip-C	FBgn0026088	CG14818	FBgn0028582	lqf	FBgn0035283	CG12024	FBgn0011577		FBgn0261797	Dhc64C	FBgn0050154	CG30154	FBgn0052082	CG32082	FBgn0052432	CG32432	FBgn0032603	CG17928
FBgn0010300	brat	FBgn0050496	CG30496	FBgn0026722	drosha	FBgn0003326	sca	FBgn0003008	or	FBgn0020617	Rx	FBgn0029147	NtR	FBgn0002522	lab	FBgn0036870	CG14095	FBgn0040843	CG15213	FBgn0036390	CG13738	FBgn0052476	mthl14	FBgn0035364		FBgn0036909	CG15881	FBgn0004780	Ccp84Ad	FBgn0038082	CG5724	FBgn0026878	CG4325	FBgn0035811	CG12262	FBgn0035285	CG12025	FBgn0040321	GNBP3	FBgn0035578	CG13707	FBgn0034513	CG13423	FBgn0036143	CG14142	FBgn0040637	CG11458	FBgn0032609	CG13280
FBgn0032763	CG17568	FBgn0085245	CG34216	FBgn0033241	CG2915	FBgn0005624	Psc	FBgn0034945	CG10904	FBgn0034564	CG9344	FBgn0000008	a	FBgn0037467	CG1104	FBgn0036872	CG12519	FBgn0035611	CG13285	FBgn0259099	DCX-EMAP	FBgn0027111	miple	FBgn0263177		FBgn0036927	CG7433	FBgn0004782	Ccp84Ab	FBgn0038113	CG11668	FBgn0025624	CG4025	FBgn0035813	CG8492	FBgn0035346	CG1146	FBgn0035975	PGRP-LA	FBgn0052232	CG32232	FBgn0050147	Hil	FBgn0036145	CG7607	FBgn0037045	CG10584	FBgn0032613	CG13283
FBgn0010097	gammaTub37C	FBgn0050497	CG30497	FBgn0026361	2013-09-05	FBgn0259876	Cap-G	FBgn0034946	CG3065	FBgn0050291	CG30291	FBgn0025186	ari-2	FBgn0037537	CG2767	FBgn0052213	CG32213	FBgn0065097	snmRNA:357	FBgn0261090	Sytbeta	FBgn0085296	CG34267	FBgn0035374	mRpS35	FBgn0036947	obst-F	FBgn0004783	Ccp84Aa	FBgn0038115	CG7966	FBgn0005670	Cyp4d1	FBgn0052368	CG32368	FBgn0035348	CG16758	FBgn0035976	PGRP-LC	FBgn0035585	CG12027	FBgn0040726	dpr	FBgn0036146	CG14141	FBgn0053054	CG33054	FBgn0051781	CR31781
FBgn0010309	pigeon	FBgn0003317	sax	FBgn0027548	nito	FBgn0086532	Spt-I	FBgn0061198	HSPC300	FBgn0001133	grau	FBgn0020307	dve	FBgn0037541	CG2747	FBgn0261341	verm	FBgn0015806	S6k	FBgn0036468	CG13461	FBgn0085297	CG34268	FBgn0260026	CG42494	FBgn0036948	CG7298	FBgn0261504	7SLRNA:CR42652	FBgn0038135	CG8773	FBgn0023549	Mct1	FBgn0035839	CG7550	FBgn0044452	Atg2	FBgn0035977	PGRP-LF	FBgn0035608	blanks	FBgn0262690	CR43160	FBgn0036153	CG7573	FBgn0053056	CG33056	FBgn0052832	CG32832
FBgn0032781	CG9987	FBgn0263121	Prosalpha1	FBgn0033247	Nup44A	FBgn0033802	CG17724	FBgn0034961	CG3163	FBgn0034572	CG9346	FBgn0034717	CG5819	FBgn0260386	mtg	FBgn0260653	serp	FBgn0052412	QC	FBgn0036469	CG18649	FBgn0261636	CG42719	FBgn0260430	CG42525	FBgn0036949	CG7290	FBgn0000003	7SLRNA:CR32864	FBgn0262844	CG43208	FBgn0040393	CG14265	FBgn0027569	cert	FBgn0052280	CG32280	FBgn0052039	CG32039	FBgn0035647	CG10486	FBgn0034590	Magi	FBgn0036210	CG14130	FBgn0262854	CG43218	FBgn0260758	CG42556
FBgn0032783	CG10237	FBgn0050382	CG30382	FBgn0020279	lig	FBgn0028991	seq	FBgn0034963	CG13567	FBgn0002736	mago	FBgn0025878	wrapper	FBgn0037565	CG9626	FBgn0052218	CR32218	FBgn0035649	CG10483	FBgn0036470	CG13463	FBgn0035170	dpr20	FBgn0035413	CG14958	FBgn0036951	CG7017	FBgn0024289	Sodh-1	FBgn0261819	CG42761	FBgn0003086	Pig1	FBgn0035868	CG7194	FBgn0035409	CG14963	FBgn0085484	CG34455	FBgn0053993	CG33993	FBgn0003891	tud	FBgn0036223	CG14126	FBgn0037097		FBgn0262355	CG43053
FBgn0024230	Hs2st	FBgn0015509	lin19	FBgn0033260	Cul-4	FBgn0053182	Kdm4B	FBgn0034967	eIF-5A	FBgn0021872	Xbp1	FBgn0034724	babos	FBgn0003886	alphaTub85E	FBgn0036927	CG7433	FBgn0052406	CG32406	FBgn0047178	CG32147	FBgn0035178		FBgn0027552	CG10863	FBgn0036952	CG6933	FBgn0051248	CG31248	FBgn0003060	CG9757	FBgn0003374	Sgs4	FBgn0035877	CG7083	FBgn0035412	CG14957	FBgn0001229	Hsp67Bc	FBgn0035691	CG7386	FBgn0010470	Fkbp13	FBgn0011455	l(3)neo18	FBgn0037128	CG14572	FBgn0051806	CG31806
FBgn0032790	CG10194	FBgn0026393	Or43b	FBgn0050372	Asap1	FBgn0011763	Dp	FBgn0025806	Rap2l	FBgn0034599	CG9437	FBgn0022984	qkr58E-3	FBgn0028401	Snap24	FBgn0036945	CG6981	FBgn0020637	Lcp65Ag2	FBgn0261681	CG42728	FBgn0024277	trio	FBgn0016013	Faa	FBgn0036990	mRpL15	FBgn0037485	CG14606	FBgn0038173	Adgf-C	FBgn0029795	CG15773	FBgn0035879	CG7112	FBgn0035425	CG17746	FBgn0001228	Hsp67Bb	FBgn0035693	CG8219	FBgn0050287	CG30287	FBgn0036282	Smyd4	FBgn0037129	CG14565	FBgn0032624	CG6304
FBgn0032791	CG18094	FBgn0033233	Kdm4A	FBgn0033264	Nup50	FBgn0033815	CG4676	FBgn0023081	gek	FBgn0261067	LSm1	FBgn0003175	px	FBgn0037758	CG9467	FBgn0262022	CG42833	FBgn0020638	Lcp65Ag1	FBgn0036563	CG13075	FBgn0035187	Trh	FBgn0004516	Gad1	FBgn0036998	CG5969	FBgn0015576	alpha-Est8	FBgn0260226	CG42500	FBgn0029848	Btd	FBgn0053057	CG33057	FBgn0263246	CG43389	FBgn0001225	Hsp26	FBgn0035699	CG13300	FBgn0034636	CG10440	FBgn0052112	CG32112	FBgn0000045	Act79B	FBgn0051784	CG31784
FBgn0002044	swm	FBgn0023171	rnh1	FBgn0260398	Pbp49	FBgn0000119	arr	FBgn0034975	enok	FBgn0050392	CG30392	FBgn0034736	CG6018	FBgn0263097	Glut4EF	FBgn0036956	CG13813	FBgn0052405	Cpr65Av	FBgn0036575	CG5157	FBgn0010246	Myo61F	FBgn0035495	CG14989	FBgn0037010	CG4825	FBgn0015575	alpha-Est7	FBgn0038214	CG9616	FBgn0030013	GIIIspla2	FBgn0035904	CG6776	FBgn0262368	mir-282	FBgn0001227	Hsp67Ba	FBgn0261801	CG42747	FBgn0050222	CG30222	FBgn0052106	CG32106	FBgn0037197	CG13239	FBgn0083942	CG34106
FBgn0040268	Top3alpha	FBgn0026722	drosha	FBgn0021995	Rs1	FBgn0033845	mars	FBgn0041706	CG3253	FBgn0016726	RpL29	FBgn0083005	snoRNA:Psi28S-1175a	FBgn0041105	nerfin-2	FBgn0036984	CG13248	FBgn0020642	Lcp65Ac	FBgn0036598	CG4982	FBgn0053230	CG33230	FBgn0004574	Rop	FBgn0040634	CG4186	FBgn0261393	alpha-Est5	FBgn0051321	CG31321	FBgn0030029	CG15343	FBgn0035917	Zasp66	FBgn0052279	dro2	FBgn0001224	Hsp23	FBgn0035720	CG10077	FBgn0259710	CG42364	FBgn0261674	CG42709	FBgn0037230	CG9780	FBgn0032632	CG6380
FBgn0032796	CG10188	FBgn0033236	CG14764	FBgn0011659	Mlh1	FBgn0033846	mip120	FBgn0021875	Zfrp8	FBgn0082972	snoRNA:Psi28S-3316a	FBgn0083004	snoRNA:Psi28S-1175b	FBgn0020379	Rfx	FBgn0036986	CG5282	FBgn0004619	Glu-RI	FBgn0036599	CG13044	FBgn0035244	ABCB7	FBgn0004552	Akh	FBgn0037057	CG10512	FBgn0037513	pyd3	FBgn0038241	CG8087	FBgn0030051	spirit	FBgn0040321	GNBP3	FBgn0035434	dro5	FBgn0001226	Hsp27	FBgn0035730	CG17744	FBgn0050263	CG30263	FBgn0036324	CG12520	FBgn0087012	5-HT2	FBgn0085199	CG34170
FBgn0003231	ref(2)P	FBgn0033241	CG2915	FBgn0013726	pnut	FBgn0033855	CG13333	FBgn0260456	CG4806	FBgn0082971	snoRNA:Psi28S-3316b	FBgn0083003	snoRNA:Psi28S-1175c	FBgn0259938	cwo	FBgn0052428	CG32428	FBgn0035710	SP1173	FBgn0036616	CG4893	FBgn0082945	snoRNA:Me28S-A2634b	FBgn0035538	DopEcR	FBgn0028663	VhaM9.7-b	FBgn0042101	CG18744	FBgn0051313	CG31313	FBgn0030097	CG12115	FBgn0035964	Dhpr	FBgn0035436	CG12016	FBgn0035983	CG4080	FBgn0023001	melt	FBgn0034659	CG4021	FBgn0052121	CG32121	FBgn0051530	CG31530	FBgn0262884	CR43239
FBgn0032812	Hakai	FBgn0026361	2013-09-05	FBgn0028836	CSN7	FBgn0000662	fl(2)d	FBgn0035059	CG3894	FBgn0086669	snoRNA:Psi18S-841a	FBgn0082925	snoRNA:Or-aca1	FBgn0037838	CG4089	FBgn0037014	CG13251	FBgn0035711	CG8519	FBgn0042137	CG18814	FBgn0035265	CG18173	FBgn0035551	CG7465	FBgn0037100	capaR	FBgn0037548	CG7900	FBgn0038243	CG8066	FBgn0030098	CG12057	FBgn0035975	PGRP-LA	FBgn0035438	PHGPx	FBgn0015296	Shc	FBgn0263218	Dscam2	FBgn0042098	CG18735	FBgn0036364	CG14109	FBgn0087005	rtp	FBgn0051804	CG31804
FBgn0032814	CG10366	FBgn0027548	nito	FBgn0022027	Vps25	FBgn0086356	tum	FBgn0035063	Eap	FBgn0082969	snoRNA:Psi28S-3316d	FBgn0040091	Ugt58Fa	FBgn0037849	CG4596	FBgn0086913	Rab26	FBgn0035719	tow	FBgn0036622	CG4753	FBgn0035293	CG5687	FBgn0028699	Rh50	FBgn0037102	CG7172	FBgn0037563	CG11672	FBgn0038290	CG6912	FBgn0030105	CG15369	FBgn0052039	CG32039	FBgn0010381	Drs	FBgn0053926	CG33926	FBgn0053278	CG33278	FBgn0034661	CG4386	FBgn0036365	CG10732	FBgn0037315	Cerk	FBgn0020503	CLIP-190
FBgn0032815	CG10462	FBgn0027054	CSN4	FBgn0033315	beta3GalTII	FBgn0262739	AGO1	FBgn0262902	CR43257	FBgn0083017	snoRNA:Psi18S-841c	FBgn0005631	robo	FBgn0037852	Tpc1	FBgn0053288	CG33288	FBgn0260660	mp	FBgn0036627	Grp	FBgn0027547	CG1927	FBgn0035591	CG4611	FBgn0000100	RpLP0	FBgn0040529	CG9603	FBgn0038291	CG3984	FBgn0054026	CG34026	FBgn0001224	Hsp23	FBgn0035444	CG12012	FBgn0035995	CG3529	FBgn0035799	CG14838	FBgn0034666	CG9294	FBgn0036368	CG10738	FBgn0037324	Orco	FBgn0051803	CG31803
FBgn0032817	CG10631	FBgn0033247	Nup44A	FBgn0003892	ptc	FBgn0033899	CG13016	FBgn0035073	CG16896	FBgn0082968	snoRNA:Psi28S-3316e	FBgn0004896	fd59A	FBgn0020910	RpL3	FBgn0037130	Syn1	FBgn0035733	CG8641	FBgn0263131	CG43373	FBgn0262107	CR42860	FBgn0035590	CG10673	FBgn0037164	CG11438	FBgn0037607	CG8036	FBgn0038292	CG3987	FBgn0259741	CG42395	FBgn0001226	Hsp27	FBgn0035445	CG12014	FBgn0036020	CG8336	FBgn0035802	CG33275	FBgn0034667	comr	FBgn0036380	CG8757	FBgn0261261	plx	FBgn0032637	CG5050
FBgn0032818	CG10628	FBgn0020279	lig	FBgn0033341	MrgBP	FBgn0033902	Tango7	FBgn0085442	NKAIN	FBgn0083046	snoRNA:Psi18S-1389a	FBgn0034821	CG9876	FBgn0065064	snoRNA:Psi28S-291	FBgn0004449	Ten-m	FBgn0035735	Cpr65Ea	FBgn0036639	CG4229	FBgn0035331	DmsR-1	FBgn0035588	CG10672	FBgn0037167	CG11425	FBgn0085330	CG34301	FBgn0038299	Spn88Eb	FBgn0052698	CG32698	FBgn0035983	CG4080	FBgn0035449	CG14971	FBgn0045823	vsg	FBgn0035806	PGRP-SD	FBgn0085399	CG34370	FBgn0001216	Hsc70-1	FBgn0261561	CG42675	FBgn0032646	CG6412
FBgn0004811	fs(2)ltoPP43	FBgn0033264	Nup50	FBgn0033348	CG8247	FBgn0000289	cg	FBgn0066084	RpL41	FBgn0010470	Fkbp13	FBgn0085400	CG34371	FBgn0263316	Mrp4	FBgn0037197	CG13239	FBgn0040837	CG8620	FBgn0026061	Mipp1	FBgn0035338	CG13800	FBgn0035587	CG4623	FBgn0037175	CG14455	FBgn0037687	CG8132	FBgn0085345	CG34316	FBgn0040941	CG15308	FBgn0035985	Cpr67B	FBgn0001254	ImpE2	FBgn0044051	Ilp1	FBgn0026263	bip1	FBgn0000008	a	FBgn0052141	CG32141	FBgn0037386	CG1208	FBgn0013810	Dhc36C
FBgn0014127	barr	FBgn0033265	coil	FBgn0033349	CG8243	FBgn0033915	CG8485	FBgn0001147	gsb-n	FBgn0260477	CG30283	FBgn0034854	CG3493	FBgn0037940	CG14720	FBgn0053169	CG33169	FBgn0035755	CG14830	FBgn0010223	Galpha73B	FBgn0250911	CG42245	FBgn0035610	Lkr	FBgn0037176	CG14456	FBgn0037697	CG9363	FBgn0038312	CG4334	FBgn0040850	CG15210	FBgn0035995	CG3529	FBgn0005640	Eip63E	FBgn0044050	Ilp3	FBgn0260967	CG42590	FBgn0034737	CG11362	FBgn0262891	CG43246	FBgn0037387	CG1213	FBgn0032647	CG15143
FBgn0019686	lok	FBgn0260398	Pbp49	FBgn0033352	CG8232	FBgn0261270	SelD	FBgn0050428	CG30428	FBgn0034654	CG10306	FBgn0086659	snoRNA:Psi18S-176	FBgn0037956	CG6959	FBgn0037217	CG14636	FBgn0035756	unc-13-4A	FBgn0036717	CG13731	FBgn0035358	CG14949	FBgn0085447	sif	FBgn0037181	CG11370	FBgn0037709	CG8199	FBgn0038348	CG18519	FBgn0003366	sev	FBgn0011327	Uch-L3	FBgn0263239	dar1	FBgn0036058	CG6707	FBgn0035861	CG7213	FBgn0034739	CG3927	FBgn0262581	CG43121	FBgn0037391	CG2017	FBgn0032648	CG15144
FBgn0004374	neb	FBgn0021995	Rs1	FBgn0033353	CG13749	FBgn0013725	phyl	FBgn0085732	CR40190	FBgn0085397	Fili	FBgn0034931	CG2812	FBgn0037992	CG4702	FBgn0037223	TwdlU	FBgn0019662	qm	FBgn0085279	CG34250	FBgn0035360	CG1246	FBgn0035630	CG10576	FBgn0053169	CG33169	FBgn0037714	CG9396	FBgn0038414	CG6901	FBgn0030262	Vago	FBgn0036030	CG6767	FBgn0035469	CG14977	FBgn0026404	Nc	FBgn0263219	Dscam4	FBgn0034742	CG4294	FBgn0259175	ome	FBgn0014863	Mlp84B	FBgn0262996	CR43304
FBgn0032858	CG10949	FBgn0010109	dpn	FBgn0033354	FANCI	FBgn0261823	Asx	FBgn0046706	Haspin	FBgn0034697	GM130	FBgn0001123	G-salpha60A	FBgn0003651	svp	FBgn0037224	TwdlF	FBgn0035777	CG8563	FBgn0036759	CG5577	FBgn0263177		FBgn0083044	snoRNA:Psi18S-1397	FBgn0037223	TwdlU	FBgn0037724	Fst	FBgn0028381	decay	FBgn0028686	Rpt3	FBgn0040475	SH3PX1	FBgn0003943	Ubi-p63E	FBgn0052055	CG32055	FBgn0035891	Oseg1	FBgn0053143	CG33143	FBgn0036440	CG17177	FBgn0015576	alpha-Est8	FBgn0032650	CG7094
FBgn0032859	Arc-p34	FBgn0013726	pnut	FBgn0033372	CG13742	FBgn0019938	RpI1	FBgn0035099	CG6845	FBgn0029147	NtR	FBgn0003008	or	FBgn0038017	CG4115	FBgn0037225	TwdlG	FBgn0035779	CG8562	FBgn0036760	CG5567	FBgn0262593	Shab	FBgn0086660	snoRNA:Psi28S-1837a	FBgn0037224	TwdlF	FBgn0037743	CG8412	FBgn0004577	Pxd	FBgn0030310	PGRP-SA	FBgn0044050	Ilp3	FBgn0035499	Chd64	FBgn0036101	NijA	FBgn0035892	exo70	FBgn0028371	jbug	FBgn0036441	CG13476	FBgn0010401	Os-C	FBgn0032654	CG15147
FBgn0083025	snoRNA:Psi18S-640b	FBgn0028836	CSN7	FBgn0010220	Dbp45A	FBgn0050077	blos1	FBgn0083992	Mkp	FBgn0025186	ari-2	FBgn0034956	CG4324	FBgn0038042	Scgbeta	FBgn0037227	TwdlV	FBgn0259935	CG42458	FBgn0036789	AlCR2	FBgn0035385	FR	FBgn0035648	CG13288	FBgn0037225	TwdlG	FBgn0037744	CG8417	FBgn0261847	CG42779	FBgn0262850	CR43214	FBgn0044048	Ilp5	FBgn0261274	Ero1L	FBgn0041094	scyl	FBgn0262719	CG43163	FBgn0259145	CG42260	FBgn0047338	CG32148	FBgn0037544	CG11035	FBgn0262356	CG43054
FBgn0083023	snoRNA:Psi18S-640d	FBgn0033316	CG14749	FBgn0033375	CG8078	FBgn0003742	tra2	FBgn0052344	CG32344	FBgn0025878	wrapper	FBgn0034967	eIF-5A	FBgn0038045	Sas	FBgn0037228	CG1092	FBgn0014011	Rac2	FBgn0036806	Cyp12c1	FBgn0052280	CG32280	FBgn0086611	Lcp65Ag3	FBgn0037227	TwdlV	FBgn0037801	CG3999	FBgn0038479	CG17477	FBgn0002562	Lsp1alpha	FBgn0052056	scramb1	FBgn0035528	CG15012	FBgn0036155	CG6163	FBgn0011577		FBgn0086408	stl	FBgn0086690	cp309	FBgn0037565	CG9626	FBgn0262876	CG43231
FBgn0051688		FBgn0003892	ptc	FBgn0033376	CG8777	FBgn0026427	Su(var)2-HP2	FBgn0052343	Atac3	FBgn0034724	babos	FBgn0023170	RpL39	FBgn0038070	CG6753	FBgn0051522	CG31522	FBgn0035785	CG8546	FBgn0052204	CG32204	FBgn0260430	CG42525	FBgn0020645	Lcp65Aa	FBgn0037232	CG9791	FBgn0024957	Irp-1B	FBgn0051269	CG31269	FBgn0020513	ade5	FBgn0036101	NijA	FBgn0035529	CG1319	FBgn0052091	CG32091	FBgn0035935	mfr	FBgn0034788	CG13532	FBgn0036479	CG13458	FBgn0037577	CG7443	FBgn0040989	CG5693
FBgn0051687	CG31687	FBgn0021825	Dmn	FBgn0033378	tsu	FBgn0082951	snoRNA:Me18S-C1366	FBgn0262139	trh	FBgn0034736	CG6018	FBgn0025806	Rap2l	FBgn0038073	CG14395	FBgn0051523	CG31523	FBgn0035792	CG7548	FBgn0036851	CG14082	FBgn0085294	CG34265	FBgn0085300	Cpr65Ay	FBgn0037330	mRpL44	FBgn0020385	pug	FBgn0038481	CG17475	FBgn0030443	CG12715	FBgn0036107	CG7949	FBgn0053514	CG33514	FBgn0040817	CG14132	FBgn0040321	GNBP3	FBgn0261564	CG42678	FBgn0036488	CG6878	FBgn0261108	Atg13	FBgn0261531	CG42659
FBgn0032863	cdc23	FBgn0033341	MrgBP	FBgn0033379	Mys45A	FBgn0082929	snoRNA:Me28S-G2703c	FBgn0035144	CG17181	FBgn0034743	RpS16	FBgn0023081	gek	FBgn0001296	kar	FBgn0037275	CG14655	FBgn0261788	Ank2	FBgn0036860	CG14086	FBgn0004167	kst	FBgn0004513	Mdr65	FBgn0037341	CG12746	FBgn0051272	CG31272	FBgn0038482	CG4053	FBgn0030509	CG11162	FBgn0036126	CG6272	FBgn0035539	slow	FBgn0262366	CG43064	FBgn0035970	CG4483	FBgn0052835	CR32835	FBgn0036497	ran-like	FBgn0037615	CG11760	FBgn0261358	CG42635
FBgn0016054	phr6-4	FBgn0033352	CG8232	FBgn0003612	Su(var)2-10	FBgn0033951	CG10139	FBgn0263042	CG43337	FBgn0083004	snoRNA:Psi28S-1175b	FBgn0003888	betaTub60D	FBgn0038095	Cyp304a1	FBgn0037323	CG2663	FBgn0035815	Snmp2	FBgn0052206	CG32206	FBgn0035476	CG12766	FBgn0001258	ImpL3	FBgn0015324	Vha26	FBgn0037842	CG6567	FBgn0051266	CG31266	FBgn0030521	CtsB1	FBgn0036136	Ufd1-like	FBgn0035540	Syx17	FBgn0262986	CG43294	FBgn0001227	Hsp67Ba	FBgn0261705	CG42741	FBgn0260777	CG42571	FBgn0037613	Cks85A	FBgn0051740	CG31740
FBgn0032870	CG2608	FBgn0033372	CG13742	FBgn0050342	Prp38	FBgn0015602	BEAF-32	FBgn0035152	CG3386	FBgn0083003	snoRNA:Psi28S-1175c	FBgn0035056	spz6	FBgn0260793	2mit	FBgn0261261	plx	FBgn0024187	syd	FBgn0036875	CG9449	FBgn0035490	CG1136	FBgn0004619	Glu-RI	FBgn0051548	CG31548	FBgn0011768	Fdh	FBgn0051267	CG31267	FBgn0052626	CG32626	FBgn0061469	Ube3a	FBgn0052243	CG32243	FBgn0046296	CG11534	FBgn0001226	Hsp27	FBgn0021979	l(2)k09913	FBgn0260776	CG42570	FBgn0037643	skap	FBgn0032660	elfless
FBgn0261787	bru	FBgn0033378	tsu	FBgn0033389	Rad51C	FBgn0027783	SMC2	FBgn0035158	CG13895	FBgn0082925	snoRNA:Or-aca1	FBgn0035085	CG3770	FBgn0040551	CG11686	FBgn0037395	CG10280	FBgn0035845	CG13675	FBgn0036878	Cpr76Ba	FBgn0016013	Faa	FBgn0035722	CG10075	FBgn0037356	CG12170	FBgn0022359	Sodh-2	FBgn0038484	CG5246	FBgn0030544	CG13403	FBgn0003378	Sgs8	FBgn0052423	shep	FBgn0036259	CG9760	FBgn0261555	CG42673	FBgn0261614	CG42703	FBgn0036542	pHCl	FBgn0037715	CG9399	FBgn0002939	ninaD
FBgn0032873	CG2614	FBgn0033379	Mys45A	FBgn0033400	CG2063	FBgn0022063	Pcf11	FBgn0035159	CG13896	FBgn0261596	RpS24	FBgn0003715	CG16778	FBgn0038132	CG15887	FBgn0026077	Gasp	FBgn0035849	ERR	FBgn0005564	Shal	FBgn0004516	Gad1	FBgn0035733	CG8641	FBgn0037358	elm	FBgn0037890	CG17734	FBgn0085308	CG34279	FBgn0030574	CG9413	FBgn0003377	Sgs7	FBgn0016031	lama	FBgn0052109	CG32109	FBgn0036017	CG3280	FBgn0034826	CG13544	FBgn0036552	CG17028	FBgn0037747	CG8481	FBgn0032664	CG5755
FBgn0086657	ik2	FBgn0033381	CG11784	FBgn0026326	Mad1	FBgn0029082	hbs	FBgn0000575	emc	FBgn0034753	CG2852	FBgn0050428	CG30428	FBgn0038156	CG14372	FBgn0046875	Obp83g	FBgn0035856	CG13679	FBgn0261360	CG42637	FBgn0035498	Fit1	FBgn0035753	RpL18	FBgn0028436	ECSIT	FBgn0262972	CR43283	FBgn0038508	CG5866	FBgn0020508	Ag5r2	FBgn0003373	Sgs3	FBgn0035623	mthl2	FBgn0036323	CG14118	FBgn0036020	CG8336	FBgn0034829	CG9899	FBgn0005536	Mbs	FBgn0037761	CG8534	FBgn0051802	CG31802
FBgn0032876	Cen	FBgn0050342	Prp38	FBgn0028473	CG8801	FBgn0015371	chn	FBgn0035162	CG13900	FBgn0050272	CG30272	FBgn0003256	rl	FBgn0085412	CG34383	FBgn0037410	Osi2	FBgn0035858	CG13674	FBgn0261688	Gyc76C	FBgn0035499	Chd64	FBgn0028648	mRpL50	FBgn0037395	CG10280	FBgn0037912	sea	FBgn0038523	CG7587	FBgn0030586	CG12539	FBgn0036205	CG14131	FBgn0035625	Blimp-1	FBgn0052115	CG32115	FBgn0045823	vsg	FBgn0085452	CG34423	FBgn0052154		FBgn0262419	mir-277	FBgn0051788	CG31788
FBgn0032877	CG2617	FBgn0015477	Rme-8	FBgn0053774	CG33774	FBgn0033998	row	FBgn0028999	nerfin-1	FBgn0010078	RpL23	FBgn0085732	CR40190	FBgn0013998	Nsf2	FBgn0040279	Osi14	FBgn0035859	CG13678	FBgn0004852	Ac76E	FBgn0003206	Ras64B	FBgn0035756	unc-13-4A	FBgn0046878	Obp83cd	FBgn0037973	CG18547	FBgn0003375	Sgs5	FBgn0030597	Eo	FBgn0262366	CG43064	FBgn0035631	Txl	FBgn0036360	CG10713	FBgn0036040	CG6749	FBgn0034859	CG3520	FBgn0036583	CG13055	FBgn0261817	CG42759	FBgn0051787	CG31787
FBgn0262743	Fs(2)Ket	FBgn0033392	CG8027	FBgn0041087	wun2	FBgn0050081	Ir51b	FBgn0025525	bab2	FBgn0004896	fd59A	FBgn0058191	CG40191	FBgn0038205	Kif19A	FBgn0037424	Osi15	FBgn0027569	cert	FBgn0036934	sNPF-R	FBgn0003710	tipE	FBgn0035779	CG8562	FBgn0037410	Osi2	FBgn0042206	GstD10	FBgn0040565	CG7606	FBgn0027601	pdgy	FBgn0036228	obst-G	FBgn0260936	scny	FBgn0036363	CG10140	FBgn0044051	Ilp1	FBgn0000241	bw	FBgn0036585	CG13071	FBgn0086359	Invadolysin	FBgn0263094	CG43362
FBgn0032882	ns4	FBgn0050343	CG30343	FBgn0033421	CG1888	FBgn0034013	unc-5	FBgn0035186	CG13912	FBgn0010622	l(2)06496	FBgn0043842	Yeti	FBgn0020299	stumps	FBgn0037428	Osi18	FBgn0035877	CG7083	FBgn0261556	CG42674	FBgn0035504	Teh4	FBgn0035785	CG8546	FBgn0027527	Osi6	FBgn0001149	GstD1	FBgn0262794	CG43175	FBgn0000535	eag	FBgn0053265	Muc68E	FBgn0035663	CG6462	FBgn0086708	stv	FBgn0044050	Ilp3	FBgn0260761	CG42559	FBgn0036590	CG13065	FBgn0261928	CG42795	FBgn0261057	Sfp36F
FBgn0000251	cad	FBgn0033400	CG2063	FBgn0010342	Map60	FBgn0000996	dup	FBgn0063667	CG32335	FBgn0003062	Fib	FBgn0039959	CG17514	FBgn0261859	CG42788	FBgn0037430	Osi20	FBgn0035879	CG7112	FBgn0036945	CG6981	FBgn0035517	CG1265	FBgn0035805	CG7506	FBgn0037417	Osi10	FBgn0010038	GstD2	FBgn0000477	DNaseII	FBgn0030688	CG8952	FBgn0036234		FBgn0035666	Jon65Aii	FBgn0262145	CR42871	FBgn0052055	CG32055	FBgn0262845	CG43209	FBgn0036591	CG13050	FBgn0262617	CG43143	FBgn0263090	CR43358
FBgn0032884	Pomp	FBgn0026326	Mad1	FBgn0050001	CG30001	FBgn0261538	CG42662	FBgn0052318	CG32318	FBgn0065073	snoRNA:229	FBgn0020660	eIF-4B	FBgn0051344	CG31344	FBgn0002522	lab	FBgn0035903	CG6765	FBgn0036948	CG7298	FBgn0053514	CG33514	FBgn0262442	mir-2501	FBgn0040279	Osi14	FBgn0010042	GstD6	FBgn0038643	CG14300	FBgn0003920	snRNA:U2:14B	FBgn0036240	CG6928	FBgn0035667	Jon65Ai	FBgn0036402	CG6650	FBgn0011569	can	FBgn0034897	Sesn	FBgn0036593	CG13048	FBgn0051373	CG31373	FBgn0032677	CG5790
FBgn0032901	sky	FBgn0028408	Drep-2	FBgn0023180	Orc6	FBgn0003130	Poxn	FBgn0025682	scf	FBgn0034821	CG9876	FBgn0262124	uex	FBgn0259823	CG42404	FBgn0004777	Ccp84Ag	FBgn0260442	rhea	FBgn0036960	CG13814	FBgn0035544	CG15021	FBgn0042112	mRpL36	FBgn0037424	Osi15	FBgn0010043	GstD7	FBgn0085311	CG34282	FBgn0030753	rngo	FBgn0002565	Lsp2	FBgn0259164	CG42269	FBgn0052138	CG32138	FBgn0085267	CG34238	FBgn0034928	CG13562	FBgn0036597	CG4962	FBgn0020439	fau	FBgn0263086	CG43354
FBgn0032906	RPA2	FBgn0259234	Camta	FBgn0033454	CG1671	FBgn0053464		FBgn0010333	Rac1	FBgn0085400	CG34371	FBgn0046706	Haspin	FBgn0019925	Surf4	FBgn0004781	Ccp84Ac	FBgn0001168	h	FBgn0052225	CG32225	FBgn0052237	CG32237	FBgn0001248	Idh	FBgn0051561	Osi16	FBgn0038038	CG5167	FBgn0038647	CG14302	FBgn0030756	CG9903	FBgn0036257	RhoGAP68F	FBgn0035678	CG10469	FBgn0000639	Fbp1	FBgn0036089	CG14151	FBgn0034950	Pask	FBgn0036602	CG13042	FBgn0037847	SelR	FBgn0011559	Acp36DE
FBgn0032907	CG9272	FBgn0085436	Not1	FBgn0011241	cbx	FBgn0003425		FBgn0035213	CG2199	FBgn0015277	Pi3K59F	FBgn0035104	CG13875	FBgn0262483	Rbp	FBgn0250732	gfzf	FBgn0035928	CG13310	FBgn0036978	Toll-9	FBgn0035582	CG13705	FBgn0035911	CG6638	FBgn0051556	CG31556	FBgn0038063	Octbeta2R	FBgn0038680	Cyp12a5	FBgn0052573	CG32573	FBgn0052099	eap	FBgn0035679	CG10467	FBgn0036419	CG13482	FBgn0260644	CG42536	FBgn0034956	CG4324	FBgn0052160	CR32160	FBgn0261808	cu	FBgn0263078	CG43339
FBgn0032916	CG9257	FBgn0033427	CG1868	FBgn0033458	CG18446	FBgn0034049	bdg	FBgn0029514	CG9166	FBgn0034913	usnp	FBgn0085482	CG34453	FBgn0038339	CG6118	FBgn0002306	sas	FBgn0035934	TrpA1	FBgn0037015	cmpy	FBgn0035583	CG13704	FBgn0017579	RpL14	FBgn0051560	CG31560	FBgn0038074	CG6188	FBgn0038681	Cyp12a4	FBgn0030777	CG9672	FBgn0000594	Est-P	FBgn0035692	CG13298	FBgn0053260	CG33260	FBgn0260643	CG42535	FBgn0034959	CG11388	FBgn0036603	CG13062	FBgn0037873	SdhC	FBgn0261349	Mst36Fb
FBgn0086251	del	FBgn0010342	Map60	FBgn0033459	CG12744	FBgn0034050	CG8297	FBgn0004635	rho	FBgn0024234	gbb	FBgn0083014	snoRNA:Psi18S-996	FBgn0038348	CG18519	FBgn0037487	CG14608	FBgn0043806	CG32032	FBgn0259243	Pka-R1	FBgn0035587	CG4623	FBgn0060292	snoRNA:U49:66Da	FBgn0037428	Osi18	FBgn0038076	Cyp313a4	FBgn0038701	CG18493	FBgn0030836	CG8664	FBgn0036264	CG11529	FBgn0005626	ple	FBgn0036461	CG10006	FBgn0083068	pncr011:3L	FBgn0050172	CG30172	FBgn0011693	Pdh	FBgn0037891	CG5214	FBgn0086681	Mst36Fa
FBgn0024371	E2f2	FBgn0050000	CG30000	FBgn0050007	CG30007	FBgn0034054	CG8366	FBgn0035247	metl	FBgn0025790	TBPH	FBgn0085292	CG34263	FBgn0051291	CG31291	FBgn0015569	alpha-Est10	FBgn0035966		FBgn0037057	CG10512	FBgn0035607	CG4835	FBgn0035914	CG6282	FBgn0026565	CG1315	FBgn0038082	CG5724	FBgn0038717	CG17751	FBgn0030837	CG8661	FBgn0052100	CG32100	FBgn0041194	Prat2	FBgn0036463	Reck	FBgn0036155	CG6163	FBgn0003353	sei	FBgn0036619	Cpr72Ec	FBgn0037895	CG6723	FBgn0032706	Irk3
FBgn0032921	Mpp6	FBgn0050001	CG30001	FBgn0033467	CG15863	FBgn0034065	Rrp42	FBgn0013753	Bgb	FBgn0034931	CG2812	FBgn0029002	miple2	FBgn0085304	CG34275	FBgn0051146	Nlg1	FBgn0035967		FBgn0028427	Ilk	FBgn0035610	Lkr	FBgn0035929	CG13311	FBgn0004778	Ccp84Af	FBgn0038107	CG17327	FBgn0038718	CG17752	FBgn0052557	CG32557	FBgn0052109	CG32109	FBgn0261445	sgl	FBgn0036516	CG7656	FBgn0036156	CG11726	FBgn0034966	CG13563	FBgn0036620	CG4842	FBgn0051116	ClC-a	FBgn0261806	CG42752
FBgn0032924	Nbr	FBgn0033450	Lsm11	FBgn0033466	Pal1	FBgn0029175	Ext2	FBgn0025725	alphaCop	FBgn0003008	or	FBgn0262139	trh	FBgn0085305	CG34276	FBgn0037519	CG3014	FBgn0004244	Rdl	FBgn0012034	AcCoAS	FBgn0035611	CG13285	FBgn0085455	CG34426	FBgn0051248	CG31248	FBgn0038115	CG7966	FBgn0038719	CG16727	FBgn0030876	CG6762	FBgn0036309	Hip1	FBgn0035767	CG8596	FBgn0014849	Eig71Ei	FBgn0036165	chrb	FBgn0034974	CG16786	FBgn0036655	CG13031	FBgn0019624	CoVa	FBgn0032709	CG15167
FBgn0000239	bur	FBgn0033453	CG1667	FBgn0033469	CG12133	FBgn0034083	lbk	FBgn0083121	Uhg7	FBgn0034945	CG10904	FBgn0263042	CG43337	FBgn0013334	Sap47	FBgn0037534	CG2781	FBgn0028431		FBgn0037065	CG12974	FBgn0065058	snoRNA:684	FBgn0085456	CG34427	FBgn0015569	alpha-Est10	FBgn0038130	CG8630	FBgn0038761	CG17190	FBgn0030880	CG6788	FBgn0036316	CG10960	FBgn0035772	Sh3beta	FBgn0014850	Eig71Ej	FBgn0053267	CG33267	FBgn0034985	CG3328	FBgn0261565	Lmpt	FBgn0013275	Hsp70Aa	FBgn0051752	CG31752
FBgn0032929	Mcm10	FBgn0023175	Prosalpha7	FBgn0262169	magu	FBgn0262166	calypso	FBgn0035257	CG12011	FBgn0061198	HSPC300	FBgn0025676	CkIIalpha-i3	FBgn0038391	GATAe	FBgn0260386	mtg	FBgn0035977	PGRP-LF	FBgn0037068	Cpr78Cb	FBgn0035648	CG13288	FBgn0011787	mRpL12	FBgn0261393	alpha-Est5	FBgn0038136	CG8774	FBgn0038783	CG4367	FBgn0030927	CG15046	FBgn0036318	Wbp2	FBgn0063083	pncr015:3L	FBgn0014851	Eig71Ek	FBgn0053490	CG33490	FBgn0034996	CG13575	FBgn0036676	CG13028	FBgn0013276	Hsp70Ab	FBgn0262095	CG42848
FBgn0032934	CG8679	FBgn0033463	CG1513	FBgn0033486	CG11866	FBgn0024249	cato	FBgn0035264	Oseg4	FBgn0013764	Chi	FBgn0035159	CG13896	FBgn0038394	CG10264	FBgn0037565	CG9626	FBgn0052037	CG32037	FBgn0037069	Cpr78Cc	FBgn0035649	CG10483	FBgn0004244	Rdl	FBgn0042101	CG18744	FBgn0052473	CG32473	FBgn0038784	CG4362	FBgn0030929	CG15043	FBgn0052115	CG32115	FBgn0035791	CG8539	FBgn0036529	pgant8	FBgn0052091	CG32091	FBgn0003888	betaTub60D	FBgn0036679	CG13022	FBgn0261714	Cpn	FBgn0028569	robl37BC
FBgn0026577	CG8677	FBgn0033467	CG15863	FBgn0033491	CG18011	FBgn0034114	CG4282	FBgn0035267	CG13921	FBgn0034968	RpL12	FBgn0000575	emc	FBgn0052855	CG32855	FBgn0051259	CG31259	FBgn0036013	CG14177	FBgn0086913	Rab26	FBgn0052406	CG32406	FBgn0028431		FBgn0037529	mRpS9	FBgn0262844	CG43208	FBgn0038845	CG10827	FBgn0030993	Mec2	FBgn0036341	Syx13	FBgn0028582	lqf	FBgn0036549	CG10516	FBgn0052088	CG32088	FBgn0035000	CG13578	FBgn0036680	Cpr73D	FBgn0037997	CG14742	FBgn0032740	CG15172
FBgn0021856	l(2)k14505	FBgn0033466	Pal1	FBgn0028426	JhI-1	FBgn0262560	wcd	FBgn0035295	Cnb	FBgn0023170	RpL39	FBgn0086064	snoRNA:Me28S-G3113b	FBgn0038402	Fer2	FBgn0261552	ps	FBgn0036017	CG3280	FBgn0261258	rgn	FBgn0035674	CG13295	FBgn0011769	Fdxh	FBgn0014930	CG2846	FBgn0027610	Dic1	FBgn0051343	CG31343	FBgn0031037	CG14207	FBgn0036360	CG10713	FBgn0035806	PGRP-SD	FBgn0036587	CG4950	FBgn0036206	CG5964	FBgn0035010	CG13579	FBgn0036688	Fit2	FBgn0038001	CG17404	FBgn0032755	CG17344
FBgn0032938	CG8671	FBgn0000606	eve	FBgn0033507	CG12909	FBgn0011260	Sema-2a	FBgn0250911	CG42245	FBgn0034982	CG4065	FBgn0086065	snoRNA:Me28S-G3113a	FBgn0038439	Cad89D	FBgn0037736	CG12950	FBgn0052057	dpr10	FBgn0037123	CG14569	FBgn0086611	Lcp65Ag3	FBgn0005533	RpS17	FBgn0037566	mRpL1	FBgn0040553	CG14374	FBgn0039006	Cyp6d4	FBgn0031092	CG9577	FBgn0036363	CG10140	FBgn0052368	CG32368	FBgn0036589	CG13067	FBgn0036212	CG11597	FBgn0035016	CG4612	FBgn0260943	Rbp6	FBgn0038002	CG12256	FBgn0002036	CG10561
FBgn0053805	His-Psi:CR33805	FBgn0033475	CG12129	FBgn0033519	CG11825	FBgn0016131	Cdk4	FBgn0035375	pgant6	FBgn0026169	snoRNA:Psi18S-1820	FBgn0083057	snoRNA:Psi18S-110	FBgn0259244	CG42342	FBgn0263097	Glut4EF	FBgn0052062	A2bp1	FBgn0037139	CG14563	FBgn0020637	Lcp65Ag2	FBgn0082953	snoRNA:Psi28S-612	FBgn0040529	CG9603	FBgn0038148	CG14377	FBgn0039015	Takl2	FBgn0031178	CG10918	FBgn0036364	CG14109	FBgn0024187	syd	FBgn0036595	CG13046	FBgn0085449	CG34420	FBgn0035020	CG13585	FBgn0052174	CG32174	FBgn0085431	CG34402	FBgn0261578	CG42688
FBgn0262620	CG43144	FBgn0033479	CG2292	FBgn0053474	CG33474	FBgn0034158	CG5522	FBgn0035376		FBgn0005636	nvy	FBgn0083058	snoRNA:Psi18S-1086	FBgn0014141	cher	FBgn0041105	nerfin-2	FBgn0036094	CG14153	FBgn0085291	CR34262	FBgn0085300	Cpr65Ay	FBgn0053696	CG33696	FBgn0051454	CG31454	FBgn0003060	CG9757	FBgn0039031	CG17244	FBgn0085520	CG40801	FBgn0086785	Vps36	FBgn0035839	CG7550	FBgn0036618	Cpr72Eb	FBgn0036221	CG11588	FBgn0053527	IFa	FBgn0036732	Oatp74D	FBgn0053098	CG33098	FBgn0040994	CR17567
FBgn0032956	Cul-2	FBgn0033483	egr	FBgn0033523	CG12895	FBgn0025830	IntS8	FBgn0035378		FBgn0003888	betaTub60D	FBgn0028999	nerfin-1	FBgn0038516	CG5840	FBgn0086359	Invadolysin	FBgn0036102	CG12523	FBgn0004514	Oct-TyrR	FBgn0261631	CG42714	FBgn0036046	Ilp2	FBgn0051259	CG31259	FBgn0051321	CG31321	FBgn0039045	CG17119			FBgn0036381	CG8745	FBgn0027569	cert	FBgn0036626	CG13036	FBgn0036230	CG11570	FBgn0015040	Cyp9c1	FBgn0001134	Grd	FBgn0038053	CG18549	FBgn0051797	CG31797
FBgn0086779	step	FBgn0033519	CG11825	FBgn0033527	CG11777	FBgn0025832	Fen1	FBgn0035393	CG16753	FBgn0035033	CG3548	FBgn0024277	trio	FBgn0085448		FBgn0262617	CG43143	FBgn0036110	Cpr67Fb	FBgn0037163	laza	FBgn0035695	CG10226	FBgn0085385	CG34356	FBgn0051450	mRpS18A	FBgn0085302	CG34273	FBgn0039049	CG6726			FBgn0036394	CG9040	FBgn0035868	CG7194	FBgn0036627	Grp	FBgn0262986	CG43294	FBgn0050161	CG30161	FBgn0036769	Tsp74F	FBgn0013277	Hsp70Ba	FBgn0032768	CG17564
FBgn0032961	CG1416	FBgn0033523	CG12895	FBgn0033528	trsn	FBgn0014870	Psi	FBgn0052486	CG32486	FBgn0050423	CG30423	FBgn0025525	bab2	FBgn0262562	CG43102	FBgn0259938	cwo	FBgn0036112	CG14147	FBgn0037165	CG11437	FBgn0004513	Mdr65	FBgn0263251	vnc	FBgn0037602	CG8021	FBgn0038239	CG14850	FBgn0039086	CG16732			FBgn0036410	CG8100	FBgn0035877	CG7083	FBgn0036628	CG13035	FBgn0041096	rols	FBgn0035056	spz6	FBgn0052192	CG32192	FBgn0051354	Hsp70Bbb	FBgn0032769	CG10750
FBgn0051612	CG31612	FBgn0033526	Caf1-105	FBgn0005630	lola	FBgn0034176	ste24a	FBgn0035405	pfk	FBgn0066084	RpL41	FBgn0260963		FBgn0261649	tinc	FBgn0037832	Desi	FBgn0036117	CG6321	FBgn0037177	CG14454	FBgn0004619	Glu-RI	FBgn0036096	CG8003	FBgn0037607	CG8036	FBgn0038240	CG14851	FBgn0039091	CG10182			FBgn0054039	CG34039	FBgn0035904	CG6776	FBgn0003515	st	FBgn0036242	CG6793	FBgn0015801	Reg-5	FBgn0259739	CG42393	FBgn0013278	Hsp70Bb	FBgn0032770	CG13086
FBgn0032974	CG3651	FBgn0033527	CG11777	FBgn0263102	psq	FBgn0026402	NiPp1	FBgn0052278	CG32278	FBgn0035085	CG3770	FBgn0004426	LysC	FBgn0000363		FBgn0263316	Mrp4	FBgn0036128	Elo68beta	FBgn0037178	CG12546	FBgn0035710	SP1173	FBgn0052073	CG32073	FBgn0037608	mRpL19	FBgn0038241	CG8087	FBgn0051148	CG31148			FBgn0003388	shd	FBgn0011577		FBgn0036665	CG13024	FBgn0002565	Lsp2	FBgn0000157	Dll	FBgn0262100	CG42853	FBgn0013279	Hsp70Bc	FBgn0032771	CG17349
FBgn0025674	CycK	FBgn0005630	lola	FBgn0033539	Git	FBgn0034210	CG6568	FBgn0052281	CG32281	FBgn0002607	RpL19	FBgn0025682	scf	FBgn0259934		FBgn0042110	CG18765	FBgn0036139	CG6216	FBgn0037179	CG14453	FBgn0035718	CG14820	FBgn0036131	CG12522	FBgn0085330	CG34301	FBgn0051313	CG31313	FBgn0039114	Lsd-1			FBgn0036436	CG4914	FBgn0040321	GNBP3	FBgn0036678	CG11905	FBgn0036259	CG9760	FBgn0085434	NaCP60E	FBgn0020300	gk	FBgn0038063	Octbeta2R	FBgn0051798	CG31798
FBgn0032979	CG1832	FBgn0263102	psq	FBgn0027499	wde	FBgn0022029	l(2)k01209	FBgn0035423	CG17737	FBgn0001147	gsb-n	FBgn0010333	Rac1	FBgn0003499	sr	FBgn0038017	CG4115	FBgn0053500	CG33500	FBgn0037180	CG14452	FBgn0035733	CG8641	FBgn0036135	mRpL2	FBgn0037671	VhaM8.9	FBgn0038257	smp-30	FBgn0039151	CG13607			FBgn0036448	mop	FBgn0035964	Dhpr	FBgn0261547	Exn	FBgn0052111	CG32111	FBgn0035086	CG12851	FBgn0036790	star1	FBgn0038072	CG6225	FBgn0053533	lectin-37Db
FBgn0032988	Tif-IA	FBgn0027499	wde	FBgn0033549	mms4	FBgn0025716	Bap55	FBgn0027616	YT521-B	FBgn0058191	CG40191	FBgn0035208	CG9184	FBgn0038579	CG14313	FBgn0038042	Scgbeta	FBgn0036177	CG33268	FBgn0052453	CG32453	FBgn0040837	CG8620	FBgn0036173	CG7394	FBgn0043791	CG8147	FBgn0038290	CG6912	FBgn0039154	Npc2f			FBgn0036461	CG10006	FBgn0035975	PGRP-LA	FBgn0036684	CG3764	FBgn0036305	CG10984	FBgn0262566	CG43106	FBgn0036821	CG3961	FBgn0038079	CG14394	FBgn0032797	CG10186
FBgn0039972	CG17018	FBgn0033551	CG7222	FBgn0033551	CG7222	FBgn0034217	Lhr	FBgn0013751	Awh	FBgn0035107	mri	FBgn0004635	rho	FBgn0011701	repo	FBgn0038045	Sas	FBgn0036196	CG11658	FBgn0037204	CG11131	FBgn0035756	unc-13-4A	FBgn0053271	CG33271	FBgn0014023	Rlc1	FBgn0038291	CG3984	FBgn0046322	p38c			FBgn0023174	Prosbeta2	FBgn0035976	PGRP-LC	FBgn0036685	CG6664	FBgn0052110	CG32110	FBgn0054038	CG34038	FBgn0262351	CG43049	FBgn0038105	yellow-f2	FBgn0051697	CG31697
FBgn0040009	CG17490	FBgn0029134	Prosbeta5	FBgn0086898	dgo	FBgn0028953	CG14478	FBgn0004880	scrt	FBgn0083014	snoRNA:Psi18S-996	FBgn0035232	CG12099	FBgn0038592	CG18599	FBgn0250910	Octbeta3R	FBgn0085449	CG34420	FBgn0037222	CG14642	FBgn0019662	qm	FBgn0036176	CG7377	FBgn0037709	CG8199	FBgn0038294	Mf	FBgn0039156	CG6178			FBgn0000565	Eip71CD	FBgn0052039	CG32039	FBgn0052185	edin	FBgn0036317	CG10948	FBgn0050429	CG30429	FBgn0036839	CG18136	FBgn0038126	CG8483	FBgn0032833	CoIV
FBgn0040011	CG17494	FBgn0033554	Lsm10	FBgn0033554	Lsm10	FBgn0034223	Tes	FBgn0028664	VhaM9.7-c	FBgn0035122	mRpL17	FBgn0035246	CG13928	FBgn0038596	CG14312	FBgn0038070	CG6753	FBgn0036220	CG5897	FBgn0041605	cpx	FBgn0035770	pst	FBgn0036177	CG33268	FBgn0037714	CG9396	FBgn0038299	Spn88Eb	FBgn0039239	CG13641			FBgn0087035	AGO2	FBgn0001229	Hsp67Bc	FBgn0036742	CG7497	FBgn0036323	CG14118	FBgn0069969	CG40498	FBgn0052206	CG32206	FBgn0000046	Act87E	FBgn0054051	CG34051
FBgn0041004	CG17715	FBgn0033556	CG12343	FBgn0033556	CG12343	FBgn0034224	CG6520	FBgn0001257	ImpL2	FBgn0085292	CG34263	FBgn0025725	alphaCop	FBgn0038603	PKD	FBgn0038084	beat-Vc	FBgn0028573	prc	FBgn0037239	CG11739	FBgn0035779	CG8562	FBgn0036179	CG7368	FBgn0037718	P58IPK	FBgn0038302	CG4210	FBgn0039299	CG11854			FBgn0036509	CG7739	FBgn0001224	Hsp23	FBgn0052182	CG32182	FBgn0036325	CG10752	FBgn0085793	CR41510	FBgn0036879	Cpr76Bb	FBgn0002937	ninaB	FBgn0262140	CG42866
FBgn0058005	CG40005	FBgn0010356	Taf5	FBgn0027525	CG7686	FBgn0034231	Apc10	FBgn0035520	CG11586	FBgn0035144	CG17181	FBgn0025712	CG13920	FBgn0051235	CG31235	FBgn0038087	beat-Va	FBgn0036235	CG6938	FBgn0085386	CG34357	FBgn0259935	CG42458	FBgn0262021	CG42832	FBgn0037724	Fst	FBgn0085345	CG34316	FBgn0039311	CG10513			FBgn0036516	CG7656	FBgn0001226	Hsp27	FBgn0036768	CG7402	FBgn0036327	CG10748	FBgn0262123	l(2)41Ab	FBgn0036881	Cpr76Bd	FBgn0038172	Adgf-D	FBgn0032834	CG13965
FBgn0000384	cta	FBgn0033566	CG18004	FBgn0010356	Taf5	FBgn0034237	eIF3-S9	FBgn0035524	CG11583	FBgn0263042	CG43337	FBgn0083121	Uhg7	FBgn0038610	CG7675	FBgn0038095	Cyp304a1	FBgn0036274	CG4328	FBgn0085335	CG34306	FBgn0035785	CG8546	FBgn0086254	CG6084	FBgn0037743	CG8412	FBgn0003721	Tm1	FBgn0051087	CG31087			FBgn0259236	comm3	FBgn0035983	CG4080	FBgn0052194	CR32194	FBgn0036338	CG11253	FBgn0040017		FBgn0036882	CG9279	FBgn0038181	CG9297	FBgn0032835	CG16772
FBgn0086683	Spf45	FBgn0050020	CG30020	FBgn0033566	CG18004	FBgn0028382	cyp33	FBgn0035541	CG15019	FBgn0035152	CG3386	FBgn0082944	snoRNA:Me28S-A2634c	FBgn0038621	CG10864	FBgn0260793	2mit	FBgn0036279	Ncc69	FBgn0051547	CG31547	FBgn0035797	CG14837	FBgn0036199	Bmcp	FBgn0037744	CG8417	FBgn0004117	Tm2	FBgn0051439	Muc96D			FBgn0262529	CG43083	FBgn0035995	CG3529	FBgn0085282	CG34253	FBgn0040814	CG14113	FBgn0085638	CG41378	FBgn0052219	CG32219	FBgn0038197	foxo	FBgn0032836	CG10680
FBgn0039958	CG12567	FBgn0033571	Rpb5	FBgn0050020	CG30020	FBgn0034243	ns2	FBgn0010894	sinu	FBgn0035153	ebd1	FBgn0035257	CG12011	FBgn0038638	CG7702	FBgn0038132	CG15887	FBgn0036287	CG10663	FBgn0010399	Nmdar1	FBgn0035813	CG8492	FBgn0036208	CG10361	FBgn0037772	Spn85F	FBgn0038326	CG5044	FBgn0051380	CG31380			FBgn0262530	CG43084	FBgn0016081	fry	FBgn0011706	rpr	FBgn0250848	26-29-p	FBgn0260995	CG42596	FBgn0053710	CG33710	FBgn0038201	Pk1r	FBgn0042129	OS9
FBgn0046692	Stlk	FBgn0033581	CG12391	FBgn0033571	Rpb5	FBgn0034249	RhoGAP54D	FBgn0035626	lin-28	FBgn0035158	CG13895	FBgn0250789	alpha-Spec	FBgn0038676	CG6026	FBgn0259831	CG34309	FBgn0036289	CG10657	FBgn0037340	CG14671	FBgn0016694	Pdp1	FBgn0036211	CG5946	FBgn0037782	Npc2d	FBgn0038337	CG6125	FBgn0051091	CG31091			FBgn0004592	Eig71Ee	FBgn0036022	CG8329	FBgn0040323	GNBP1	FBgn0262145	CR42871	FBgn0052475	mthl8	FBgn0052220	Csas	FBgn0051326	CG31326	FBgn0032839	CG10659
FBgn0039994	CG17082	FBgn0033584	CG7737	FBgn0033581	CG12391	FBgn0034258	eIF3-S8	FBgn0052418	vito	FBgn0000575	emc	FBgn0262107	CR42860	FBgn0038679	CG6040	FBgn0038144	CG8870	FBgn0036321	CG14120	FBgn0015324	Vha26	FBgn0010350	CdsA	FBgn0036213	RpL10Ab	FBgn0024957	Irp-1B	FBgn0027657	glob1	FBgn0051089	CG31089			FBgn0036531	CG6244	FBgn0036023	CG18179	FBgn0036813	Aut1	FBgn0036402	CG6650	FBgn0035097	CG13405	FBgn0005633	fln	FBgn0038224	CG3321	FBgn0032843	CG10730
FBgn0026238	gus	FBgn0085253	CG34224	FBgn0085253	CG34224	FBgn0034264	CG10933	FBgn0035643	CG13287	FBgn0083057	snoRNA:Psi18S-110	FBgn0035308	CG15822	FBgn0260003	Dys	FBgn0051337	CG31337	FBgn0036322		FBgn0260002	snoRNA:Me28S-U2134b	FBgn0035903	CG6765	FBgn0036223	CG14126	FBgn0051278	CG31278	FBgn0038400	CG5903	FBgn0002578	m1			FBgn0036550	CG17026	FBgn0036030	CG6767	FBgn0036817	CG6865	FBgn0041161	blue	FBgn0035104	CG13875	FBgn0013303	Nca	FBgn0051313	CG31313	FBgn0032853	CG10651
FBgn0033015	d4	FBgn0033605	CG9067	FBgn0033605	CG9067	FBgn0034266	CG4975	FBgn0052409	CG32409	FBgn0028999	nerfin-1	FBgn0010909	msn	FBgn0038725	CG6184	FBgn0085412	CG34383	FBgn0023095	caps	FBgn0037354	CG12171	FBgn0001168	h	FBgn0036225	CG5883	FBgn0051272	CG31272	FBgn0020907	Scp2	FBgn0085320	CG34291			FBgn0036553	CG17027	FBgn0040475	SH3PX1	FBgn0036849	CG14079	FBgn0052138	CG32138	FBgn0262109	CR42862	FBgn0036931	CG14183	FBgn0038250	CG3505	FBgn0250817	CR40465
FBgn0033019	CG10395	FBgn0033607	CG9062	FBgn0041174	Vhl	FBgn0003545	sub	FBgn0053993	CG33993	FBgn0025525	bab2	FBgn0035375	pgant6	FBgn0038727	CG7432	FBgn0038202	CG12402	FBgn0036367	CG10116	FBgn0083949	CG34113	FBgn0035929	CG13311	FBgn0036226	CG7252	FBgn0261380	mRpL37	FBgn0038463	CG3534	FBgn0262577	CG43117			FBgn0036571	CG12272	FBgn0045823	vsg	FBgn0036871	CG14096	FBgn0036421	CG13481	FBgn0027111	miple	FBgn0004366	rdgC	FBgn0038268	CG3631	FBgn0040996	CG12617
FBgn0033028	CG11665	FBgn0025373	Fpps	FBgn0033609	fbl6	FBgn0022740	HLH54F	FBgn0035656	CG10479	FBgn0035186	CG13912	FBgn0052486	CG32486	FBgn0038803	CG5191	FBgn0038205	Kif19A	FBgn0086708	stv	FBgn0046878	Obp83cd	FBgn0085455	CG34426	FBgn0036233		FBgn0037842	CG6567	FBgn0261847	CG42779	FBgn0039428	CG14237			FBgn0036573		FBgn0044050	Ilp3	FBgn0052214	CG32214	FBgn0036423	CG3919	FBgn0259744		FBgn0052228	CG32228	FBgn0038271	CG3731	FBgn0003475	spir
FBgn0027507	CG1344	FBgn0001276	ix	FBgn0033615	CG7741	FBgn0028744	CG5033	FBgn0028980	tan	FBgn0025682	scf	FBgn0026189	prominin-like	FBgn0038814	CG15923	FBgn0261859	CG42788	FBgn0262350		FBgn0037408	NPFR1	FBgn0035934	TrpA1	FBgn0036294	CG10654	FBgn0037846	CG6574	FBgn0051269	CG31269	FBgn0039454	CG14247			FBgn0036576	CG5151	FBgn0044048	Ilp5	FBgn0036891	CG9372	FBgn0054039	CG34039	FBgn0259743		FBgn0001247	Ide	FBgn0038285	CG6974	FBgn0032857	CG10947
FBgn0259979	CG17337	FBgn0024188	san	FBgn0025373	Fpps	FBgn0259211	grh	FBgn0035687	CG13296	FBgn0010333	Rac1	FBgn0052278	CG32278	FBgn0051201	GluRIIE	FBgn0028984	Spn5	FBgn0052132		FBgn0037448	CG15186	FBgn0043806	CG32032	FBgn0004926	eIF-2beta	FBgn0040253	Ugt86Dg	FBgn0051265	CG31265	FBgn0051075	CG31075			FBgn0053687	CG33687	FBgn0036058	CG6707	FBgn0003744	trc	FBgn0036439	CG13474	FBgn0035134	CG1231	FBgn0036985	zye	FBgn0038286	CG6966	FBgn0051677	CG31677
FBgn0259978	vlc	FBgn0000581	E(Pc)	FBgn0000581	E(Pc)	FBgn0034282	Mapmodulin	FBgn0022699	D19B	FBgn0035208	CG9184	FBgn0052281	CG32281	FBgn0028422	KaiRIA	FBgn0259823	CG42404	FBgn0085429		FBgn0026565	CG1315	FBgn0035967		FBgn0085271	CG34242	FBgn0037890	CG17734	FBgn0038481	CG17475	FBgn0039470	CG6296			FBgn0036577	CG13073	FBgn0052056	scramb1	FBgn0250791	Snap	FBgn0053260	CG33260	FBgn0001316	klar	FBgn0036995	CG5195	FBgn0038293	CG6904	FBgn0032867	CG15475
FBgn0033050	Pngl	FBgn0033636	tou	FBgn0000577	en	FBgn0003520	stau	FBgn0002526	LanA	FBgn0029514	CG9166	FBgn0047135	CG32276	FBgn0038837	CG3822	FBgn0038312	CG4334	FBgn0036390	CG13738	FBgn0002522	lab	FBgn0004244	Rdl	FBgn0036319	Ent3	FBgn0037892	mRpL40	FBgn0038482	CG4053	FBgn0039482	CG14258			FBgn0036587	CG4950	FBgn0262439	mir-276a	FBgn0001259	in	FBgn0036447	CG17173	FBgn0035142	hipk	FBgn0261832	CG42764	FBgn0038294	Mf	FBgn0032868	CG17472
FBgn0033052	SCAP	FBgn0044020	Roc2	FBgn0033636	tou	FBgn0083054	snoRNA:Psi18S-1347a	FBgn0035699	CG13300	FBgn0004635	rho	FBgn0086068	snoRNA:Or-CD12	FBgn0000083	AnnIX	FBgn0262483	Rbp	FBgn0259099	DCX-EMAP	FBgn0015577	alpha-Est9	FBgn0035968	Slc45-1	FBgn0036334	CG11267	FBgn0037898	CG18643	FBgn0051266	CG31266	FBgn0085322	CG34293			FBgn0036623	CG4729	FBgn0036101	NijA	FBgn0036988	CG5262	FBgn0036463	Reck	FBgn0035161	CG13898	FBgn0040634	CG4186	FBgn0038309	CG6499	FBgn0051680	CG31680
FBgn0033055	tbce	FBgn0033653	CG13192	FBgn0033652	ths	FBgn0034304	CG5742	FBgn0086680	vvl	FBgn0035238	CG12104	FBgn0035423	CG17737	FBgn0038852	CG7056	FBgn0038341	CG14869	FBgn0261090	Sytbeta	FBgn0083963	CG34127	FBgn0028431		FBgn0036335	mRpL20	FBgn0037912	sea	FBgn0051267	CG31267	FBgn0039519	Cyp6a18			FBgn0028399	TMS1	FBgn0036107	CG7949	FBgn0082948	snoRNA:Me18S-U1356b	FBgn0036481	CG16959	FBgn0261914		FBgn0052432	CG32432	FBgn0016691	Oscp	FBgn0261058	Sfp38D
FBgn0021847	l(2)k14710	FBgn0033656	S2P	FBgn0033653	CG13192	FBgn0022238	lolal	FBgn0035721	CG9948	FBgn0035247	metl	FBgn0035428	CG14960	FBgn0038853	RhoGAP93B	FBgn0038366	CG4576	FBgn0036466	CG18581	FBgn0042104	CG18747	FBgn0035977	PGRP-LF	FBgn0036337	CG11255	FBgn0042110	CG18765	FBgn0038485	CG5255	FBgn0039537	CG5590			FBgn0028693	Rpn12	FBgn0036136	Ufd1-like	FBgn0037007	CG5059	FBgn0036492	Best3	FBgn0035178		FBgn0037037	CG10588	FBgn0003721	Tm1	FBgn0032869	CG17470
FBgn0263144	bin3	FBgn0013756	Mtor	FBgn0013756	Mtor	FBgn0034307	CG10914	FBgn0001104	G-ialpha65A	FBgn0013753	Bgb	FBgn0035430	CG12009	FBgn0015790	Rab11	FBgn0051291	CG31291	FBgn0036470	CG13463	FBgn0042102	CG18745	FBgn0040305	MTF-1	FBgn0260441	RpS12	FBgn0037940	CG14720	FBgn0051262	CG31262	FBgn0039543	CG12428			FBgn0025558	CG4101	FBgn0061469	Ube3a	FBgn0037013	CG13250	FBgn0036496	CG7804	FBgn0035179	CG12038	FBgn0037046	CG10581	FBgn0004117	Tm2	FBgn0042133	CG18810
FBgn0033075	Pld	FBgn0033663	ERp60	FBgn0033661	CG13185	FBgn0000658	fj	FBgn0035761	RhoGEF4	FBgn0025725	alphaCop	FBgn0263239	dar1	FBgn0038876	CG5919	FBgn0085304	CG34275	FBgn0036481	CG16959	FBgn0042103	CG18746	FBgn0036013	CG14177	FBgn0011284	RpS4	FBgn0037973	CG18547	FBgn0262003	CG42821	FBgn0262588	CG43125			FBgn0021768	nudC	FBgn0040817	CG14132	FBgn0053056	CG33056	FBgn0036498	CG13455	FBgn0004870	bab1	FBgn0053054	CG33054	FBgn0038321	CG6218	FBgn0032878	CG9316
FBgn0042085	Bap170	FBgn0000556	Ef1alpha48D	FBgn0260932	cuff	FBgn0034346	CG12263	FBgn0035763	CG8602	FBgn0025712	CG13920	FBgn0013751	Awh	FBgn0002941	slou	FBgn0085305	CG34276	FBgn0053985	CG33985	FBgn0037517	CG10086	FBgn0053696	CG33696	FBgn0086601	snoRNA:Psi28S-3327c	FBgn0038017	CG4115	FBgn0262004	CG42822	FBgn0262587	CG43124			FBgn0023197	Jon74E	FBgn0262366	CG43064	FBgn0000551	Edg78E	FBgn0036534	Dcp2	FBgn0054022		FBgn0262855	CG43219	FBgn0017567	ND23	FBgn0032879	CG9317
FBgn0029131	debcl	FBgn0033665	CG13189	FBgn0026573	CG8290	FBgn0050120	CG30120	FBgn0035765		FBgn0026372	RpL23A	FBgn0004880	scrt	FBgn0038926	CG13409	FBgn0038391	GATAe	FBgn0053983	obst-H	FBgn0042101	CG18744	FBgn0036043	CG8177	FBgn0036342	CG11279	FBgn0001149	GstD1	FBgn0038519	Prx3	FBgn0085465	CG34436			FBgn0000567	Eip74EF	FBgn0053265	Muc68E	FBgn0037069	Cpr78Cc	FBgn0036549	CG10516	FBgn0260963		FBgn0262854	CG43218	FBgn0051183	CG31183	FBgn0032883	CG9323
FBgn0050443	Opbp	FBgn0026573	CG8290	FBgn0050036	CG30036	FBgn0261119	Prp19	FBgn0035767	CG8596	FBgn0035256	CG13930	FBgn0004895	fd64A	FBgn0017397		FBgn0038394	CG10264	FBgn0040799	CG13051	FBgn0014930	CG2846	FBgn0025866	CalpB	FBgn0036362	CG10725	FBgn0010038	GstD2	FBgn0038525	CG14329	FBgn0085466	CG34437			FBgn0036740	CG6259	FBgn0036240	CG6928	FBgn0037074	CG7324	FBgn0036567	CG13074	FBgn0004426	LysC	FBgn0261258	rgn	FBgn0038385	CG4221	FBgn0053322	CG33322
FBgn0033081	geminin	FBgn0053145	CG33145	FBgn0011704	RnrS	FBgn0050122	CG30122	FBgn0035769	CTCF	FBgn0035257	CG12011	FBgn0016013	Faa	FBgn0085405	CG34376	FBgn0038422	CG14880	FBgn0040798	CG13069	FBgn0243512	puc	FBgn0085385	CG34356	FBgn0085272		FBgn0010043	GstD7	FBgn0085310	CG34281	FBgn0039591	CG9988			FBgn0036756	cln3	FBgn0002565	Lsp2	FBgn0037094	CG7611	FBgn0036568	CG5389	FBgn0052333	CG32333	FBgn0037101	CG7634	FBgn0038400	CG5903	FBgn0032888	CheB38c
FBgn0013732	sced	FBgn0259985	Mppe	FBgn0085260	CG34231	FBgn0023214	edl	FBgn0082598	akirin	FBgn0035264	Oseg4	FBgn0011653	mas	FBgn0038977	CG5376	FBgn0038487	TwdlW	FBgn0036588	CG13068	FBgn0037563	CG11672	FBgn0052054	CG32054	FBgn0052132		FBgn0010044	GstD8	FBgn0038527	CG14324	FBgn0039670	CG7567			FBgn0085282	CG34253	FBgn0046296	CG11534	FBgn0037126	CG14567	FBgn0036577	CG13073	FBgn0035206	CG9186	FBgn0037107	CG7166	FBgn0038404	CG8925	FBgn0028986	Spn3
FBgn0033083	Dpit47	FBgn0024732	Drep-1	FBgn0004463	RpIII128	FBgn0034379	CG15073	FBgn0052372	ltl	FBgn0261562	CG42676	FBgn0035522	CG1273	FBgn0046114	Gclm	FBgn0262871	lute	FBgn0085277	CG34248	FBgn0020249	stck	FBgn0052057	dpr10	FBgn0085429		FBgn0038038	CG5167	FBgn0038528	CG14326	FBgn0039671	CG11470			FBgn0036782	CG7320	FBgn0036257	RhoGAP68F	FBgn0037127	CG14566	FBgn0036584	CG13054	FBgn0003295	ru	FBgn0037138	P5CDh1	FBgn0038407	CG6126	FBgn0032894	CG14402
FBgn0033087	Hsepi	FBgn0027495	CG8378	FBgn0033686	Hen1	FBgn0034380	CG15087	FBgn0035824	CG8281	FBgn0261723	Dbx	FBgn0035533	Cip4	FBgn0039025	CG7023	FBgn0262004	CG42822	FBgn0040797	CG13066	FBgn0259182		FBgn0036099	CG11811	FBgn0036393	CG17362	FBgn0028374	hug	FBgn0000477	DNaseII	FBgn0051041	CG31041			FBgn0052196	CG32196	FBgn0052099	eap	FBgn0037128	CG14572	FBgn0040801	CG13053	FBgn0052320	CG32320	FBgn0000045	Act79B	FBgn0020907	Scp2	FBgn0032896	CG14400
FBgn0033088	CG3271	FBgn0033686	Hen1	FBgn0027504	CG8878	FBgn0014269	prod	FBgn0035827	Srp9	FBgn0035335	mRpL23	FBgn0035541	CG15019	FBgn0039026	CG7029	FBgn0038526	CG14327	FBgn0036592	CG13049	FBgn0259181		FBgn0036116	CG7888	FBgn0026418	Hsc70Cb	FBgn0262383	mir-284	FBgn0004652	fru	FBgn0039685	Obp99b			FBgn0036805	Chmp1	FBgn0000594	Est-P	FBgn0037129	CG14565	FBgn0085276	CG34247	FBgn0053971	Ir62a	FBgn0037174	CG14457	FBgn0027562	CG10345	FBgn0053318	CR33318
FBgn0033092	CG9422	FBgn0027504	CG8878	FBgn0033688	Prp8	FBgn0041702	CG15107	FBgn0035829	HP4	FBgn0261602	RpL8	FBgn0261526	NT1	FBgn0039038	CG6688	FBgn0038541	TyrRII	FBgn0036593	CG13048	FBgn0051454	CG31454	FBgn0263241	Mocs1	FBgn0026409	Mpcp	FBgn0038074	CG6188	FBgn0038643	CG14300	FBgn0262112	sro			FBgn0036843	CG6812	FBgn0052109	CG32109	FBgn0037131	CG14564	FBgn0036586	CG13070	FBgn0035234	CG12003	FBgn0053170	CG33170	FBgn0051217	modSP	FBgn0053319	CR33319
FBgn0033089	CG17266	FBgn0023167	SmD3	FBgn0023167	SmD3	FBgn0034422	CG7137	FBgn0011817	nmo	FBgn0035374	mRpS35	FBgn0005775	Con	FBgn0039043	CG17121	FBgn0262562	CG43102	FBgn0036594	CG13047	FBgn0051259	CG31259	FBgn0053500	CG33500	FBgn0028418	Lk	FBgn0016693	Past1	FBgn0085311	CG34282	FBgn0003357	Jon99Ciii			FBgn0036846	MESR6	FBgn0052113	CG32113	FBgn0037140	CG7442	FBgn0040796	CG13064	FBgn0035237	CG13917	FBgn0262509	nrm	FBgn0015011	Ahcy89E	FBgn0032911	tadr
FBgn0033101	CG9436	FBgn0000426	SmF	FBgn0000426	SmF	FBgn0003254	rib	FBgn0262716	Arp66B	FBgn0035375	pgant6	FBgn0010747	Srp54k	FBgn0039064	CG4467	FBgn0000363		FBgn0036595	CG13046	FBgn0261929	CG42796	FBgn0053272	CG33272	FBgn0029148	NHP2	FBgn0038082	CG5724	FBgn0038645	CG7714	FBgn0003356	Jon99Cii			FBgn0036849	CG14079	FBgn0036309	Hip1	FBgn0029091	CS-2	FBgn0040794	CG13056	FBgn0035243	CG13926	FBgn0052230	CG32230	FBgn0038460	CG18622	FBgn0053509	CG33509
FBgn0033104	CG15237	FBgn0020377	Sr-CII	FBgn0020377	Sr-CII	FBgn0013954	FK506-bp2	FBgn0062463		FBgn0052486	CG32486	FBgn0085371	CG34342	FBgn0039068	CG13827	FBgn0003499	sr	FBgn0036598	CG4982	FBgn0037671	VhaM8.9	FBgn0053271	CG33271	FBgn0036460	CG5114	FBgn0038098	CG7381	FBgn0038646	CG7715	FBgn0086355	Tpi			FBgn0260857	Bet1	FBgn0036316	CG10960	FBgn0037171	CG14459	FBgn0036617	Cpr72Ea	FBgn0035260	CG7991	FBgn0058298	CG40298	FBgn0038570	Prx5	FBgn0032913	CG9259
FBgn0033117	CG3358	FBgn0000253	Cam	FBgn0033712	CG13163	FBgn0034430	mip40	FBgn0017579	RpL14	FBgn0035401	CG1291	FBgn0010894	sinu	FBgn0039075	CG4393	FBgn0038596	CG14312	FBgn0036599	CG13044	FBgn0037697	CG9363	FBgn0053270	CG33270	FBgn0002778	mnd	FBgn0002354	l(3)87Df	FBgn0038674	CG14285	FBgn0039760	CG9682			FBgn0062928	pncr009:3L	FBgn0036320	CG10943	FBgn0262951	CR43270	FBgn0036627	Grp	FBgn0035258	CG13931	FBgn0040056	CG17698	FBgn0262559	Mdh2	FBgn0263051	CG43346
FBgn0053558	mim	FBgn0033712	CG13163	FBgn0033718	ana3	FBgn0040273	Spt5	FBgn0060291	snoRNA:U49:66Db	FBgn0052278	CG32278	FBgn0035621	CG10591	FBgn0039099	CG10157	FBgn0051235	CG31235	FBgn0036600	CG13043	FBgn0000244	by	FBgn0263247	CG43390	FBgn0261090	Sytbeta	FBgn0038135	CG8773	FBgn0038680	Cyp12a5	FBgn0015222	Fer1HCH			FBgn0022774	Oat	FBgn0036333	MICAL-like	FBgn0027339	jim	FBgn0036628	CG13035	FBgn0262624	Tmhs	FBgn0058470	CG40470	FBgn0038654	CG14298	FBgn0010100	Acon
FBgn0033121	Cyp6u1	FBgn0033715	CG8490	FBgn0010238	Lac	FBgn0003887	betaTub56D	FBgn0011509	SrpRbeta	FBgn0047135	CG32276	FBgn0035626	lin-28	FBgn0039106	CG10301	FBgn0038610	CG7675	FBgn0036601	CG13063	FBgn0037723	SpdS	FBgn0263248	CG43391	FBgn0036467	CG12310	FBgn0038136	CG8774	FBgn0038681	Cyp12a4	FBgn0015221	Fer2LCH			FBgn0028695	Rpn1	FBgn0036341	Syx13	FBgn0028993	scro	FBgn0014163	fax	FBgn0262110	CG42863	FBgn0058053	CG40053	FBgn0003248	Rh2	FBgn0051627	CG31627
FBgn0022960	vimar	FBgn0033737	Nup54	FBgn0033740	dgt5	FBgn0002716	mei-W68	FBgn0086706	pix	FBgn0035423	CG17737	FBgn0082994	snoRNA:Psi28S-1837c	FBgn0001205		FBgn0038621	CG10864	FBgn0036605	CG13041	FBgn0037724	Fst	FBgn0053269	CG33269	FBgn0036468	CG13461	FBgn0052473	CG32473	FBgn0038701	CG18493	FBgn0039769	CG15534			FBgn0036921	RhoGDI	FBgn0036360	CG10713	FBgn0040001	CG17374	FBgn0262732	mbf1	FBgn0035299	CG11815	FBgn0011288	Snap25	FBgn0085313	CG34284	FBgn0051988	CG31988
FBgn0033122	CG17002	FBgn0010238	Lac	FBgn0033741	CG8545	FBgn0004364	18w	FBgn0035956	Doc2	FBgn0014388	sty	FBgn0082995	snoRNA:Psi28S-1837b	FBgn0039111	Plip	FBgn0038642	Muc91C	FBgn0036606	CG13060	FBgn0260463	Unc-115b	FBgn0052091	CG32091	FBgn0036488	CG6878	FBgn0262844	CG43208	FBgn0038718	CG17752	FBgn0039777	Jon99Fii			FBgn0036929	CG7668	FBgn0036364	CG14109	FBgn0260997	CG42598	FBgn0036648	CG4098	FBgn0259701	CG42355	FBgn0058064	ARY	FBgn0038658	CG14292	FBgn0261586	CG42696
FBgn0033155	Br140	FBgn0033741	CG8545	FBgn0033751	CG8818	FBgn0005655	mus209	FBgn0028789	Doc1	FBgn0013751	Awh	FBgn0035643	CG13287	FBgn0051140	CG31140	FBgn0015323	VAChT	FBgn0261635	CG42718	FBgn0051352	Unc-115a	FBgn0036205	CG14131	FBgn0040805	CG12355	FBgn0027610	Dic1	FBgn0038730	CG6300	FBgn0039778	Jon99Fi			FBgn0036940	obst-J	FBgn0086785	Vps36	FBgn0051516	CG31516	FBgn0036677	CG13023	FBgn0262107	CR42860	FBgn0260008	Ucrh	FBgn0038662	CG14290	FBgn0023090	dtr
FBgn0260991	Incenp	FBgn0033752	CG8569	FBgn0011592	fra	FBgn0034503	MED8	FBgn0035986	CG4022	FBgn0035482	CG14985	FBgn0052407	CG32407	FBgn0039159	mRpS24	FBgn0038653	CG18208	FBgn0036607	CG13059	FBgn0028401	Snap24	FBgn0036220	CG5897	FBgn0053986	CG33986	FBgn0044511	mRpS21	FBgn0038731	CG11659	FBgn0026190	PH4alphaMP			FBgn0262022	CG42833	FBgn0036381	CG8745	FBgn0027930	MP1	FBgn0036678	CG11905	FBgn0035308	CG15822	FBgn0069977	CG40467	FBgn0027785	NP15.6	FBgn0016919	nompB
FBgn0000352	cos	FBgn0022764	Sin3A	FBgn0022764	Sin3A	FBgn0034504	CG8929	FBgn0035993	Nf-YA	FBgn0004895	fd64A	FBgn0053993	CG33993	FBgn0039167	CG17786	FBgn0051475	CG31475	FBgn0040795	CG13038	FBgn0037747	CG8481	FBgn0036225	CG5883	FBgn0053985	CG33985	FBgn0038194	Cyp6d5	FBgn0038753	CG4459	FBgn0039780	PH4alphaNE1			FBgn0036950	CG6996	FBgn0262145	CR42871	FBgn0037235	CG1103	FBgn0036685	CG6664	FBgn0035321	CG1275	FBgn0058178	CG40178	FBgn0016120	ATPsyn-d	FBgn0032964	CG11630
FBgn0033166	Eaf	FBgn0011604	Iswi	FBgn0028683	spt4	FBgn0034523	Nnf1a	FBgn0036018	CG3335	FBgn0004574	Rop	FBgn0035656	CG10479	FBgn0262389	mir-1017	FBgn0260003	Dys	FBgn0036610	CG13058	FBgn0037750	Whamy	FBgn0036229	CG7248	FBgn0261682	CG42729	FBgn0010340	140up	FBgn0038761	CG17190	FBgn0051015	PH4alphaPV			FBgn0250791	Snap	FBgn0036410	CG8100	FBgn0051522	CG31522	FBgn0261872	scaf6	FBgn0259200	CG42304	FBgn0260997	CG42598	FBgn0038679	CG6040	FBgn0032965	CG11629
FBgn0033177	CG11141	FBgn0033762	CG8632	FBgn0011604	Iswi	FBgn0015907	bl	FBgn0036035	CG18178	FBgn0259986	nab	FBgn0035676	CG6619	FBgn0039217	CG13627	FBgn0038725	CG6184	FBgn0036612	CG4998	FBgn0037766	Teh1	FBgn0028573	prc	FBgn0261681	CG42728	FBgn0038207	CG14356	FBgn0038783	CG4367	FBgn0039798	CG11313			FBgn0036975	CG5618	FBgn0036416	CG7924	FBgn0051530	CG31530	FBgn0260943	Rbp6	FBgn0052487	CG32487	FBgn0053294	CR33294	FBgn0003011	ort	FBgn0032966	CG1421
FBgn0033179	p47	FBgn0003326	sca	FBgn0033766	CG8771	FBgn0034537	DMAP1	FBgn0036036	CG14174	FBgn0035533	Cip4	FBgn0035677	CG13293	FBgn0040600	CG13631	FBgn0038727	CG7432	FBgn0036616	CG4893	FBgn0004575	Syn	FBgn0036233		FBgn0036515	CG12304	FBgn0038234	mRpL11	FBgn0038784	CG4362	FBgn0039800	Npc2g			FBgn0027565	CG5498	FBgn0085273	CG34244	FBgn0037279	CG1129	FBgn0052185	edin	FBgn0035398	Cht7	FBgn0037217	CG14636	FBgn0024963	GluClalpha	FBgn0032968	CG11634
FBgn0033183	CG1620	FBgn0033781	CG13319	FBgn0003326	sca	FBgn0034540	Lrt	FBgn0004390	Gap1	FBgn0027085	Aats-leu	FBgn0061492	loj	FBgn0039224	CG13634	FBgn0038803	CG5191	FBgn0263131	CG43373	FBgn0259938	cwo	FBgn0036235	CG6938	FBgn0036547	CG17032	FBgn0038257	smp-30	FBgn0038795	CG4335	FBgn0039817	CG15553			FBgn0036988	CG5262	FBgn0036417	CG7906	FBgn0250839	CG2016	FBgn0036771	CG14353	FBgn0035399	CG14955	FBgn0041605	cpx	FBgn0038732	CG11391	FBgn0032969	CG2528
FBgn0015929	dpa	FBgn0004512	Mdr49	FBgn0005624	Psc	FBgn0011674	insc	FBgn0052062	A2bp1	FBgn0005775	Con	FBgn0005658	Ets65A	FBgn0051118	RabX4	FBgn0038814	CG15923	FBgn0036638	CG13033	FBgn0004841	Takr86C	FBgn0027843	CAH2	FBgn0036551	CG17029	FBgn0038290	CG6912	FBgn0262146	MtnE	FBgn0039840	CG11340			FBgn0037000	CG5130	FBgn0036419	CG13482	FBgn0037290	CG1124	FBgn0086081	snoRNA:Me28S-A30	FBgn0026189	prominin-like	FBgn0037238	CG1090	FBgn0038733	CG11407	FBgn0051693	CG31693
FBgn0025185	az2	FBgn0005624	Psc	FBgn0259876	Cap-G	FBgn0034564	CG9344	FBgn0036096	CG8003	FBgn0035590	CG10673	FBgn0002526	LanA	FBgn0039264	CG11786	FBgn0051201	GluRIIE	FBgn0036639	CG4229	FBgn0020439	fau	FBgn0036273	CG10426	FBgn0036599	CG13044	FBgn0038302	CG4210	FBgn0038804	CG10877	FBgn0025837	CG17636			FBgn0037007	CG5059	FBgn0087007	bbg	FBgn0037291	CG14662	FBgn0259739	CG42393	FBgn0035426	CG12078	FBgn0051525	CG31525	FBgn0038744	CG4733	FBgn0053987	CR33987
FBgn0033185	CG1603	FBgn0033806	FLASH	FBgn0033802	CG17724	FBgn0034572	CG9346	FBgn0262890	CG43245	FBgn0010747	Srp54k	FBgn0035699	CG13300	FBgn0039272	CG11836	FBgn0028422	KaiRIA	FBgn0026061	Mipp1	FBgn0037832	Desi	FBgn0036274	CG4328	FBgn0260460	mRpS34	FBgn0085345	CG34316	FBgn0083055	snoRNA:Psi18S-1295	FBgn0040383	CG5254			FBgn0037009	CG5104	FBgn0036436	CG4914	FBgn0013576	mtd	FBgn0262898	CG43253	FBgn0035429	CG12017	FBgn0052945	CG32945	FBgn0038761	CG17190	FBgn0051601	CG31601
FBgn0033186	CG1602	FBgn0011763	Dp	FBgn0028991	seq	FBgn0003391	shg	FBgn0013469	klu	FBgn0260856	membrin	FBgn0020251	sfl	FBgn0022800	Cad96Ca	FBgn0053094	Synd	FBgn0036665	CG13024	FBgn0037853	CG14696	FBgn0261674	CG42709	FBgn0042137	CG18814	FBgn0019925	Surf4	FBgn0038858	CG5793	FBgn0025620	CG13360			FBgn0037013	CG13250	FBgn0053260	CG33260	FBgn0037313	CG1161	FBgn0052194	CR32194	FBgn0262544	CG43098	FBgn0037275	CG14655	FBgn0003249	Rh3	FBgn0085202	CG34173
FBgn0033187	CG2144	FBgn0033814	CG4670	FBgn0033806	FLASH	FBgn0011824	CG4038	FBgn0052069	CG32069	FBgn0035603	CG10635	FBgn0035751	CG14829	FBgn0039294	Cad96Cb	FBgn0038837	CG3822	FBgn0036688	Fit2	FBgn0040256	Ugt86Dd	FBgn0036322		FBgn0036627	Grp	FBgn0038326	CG5044	FBgn0038866	CG5810	FBgn0026088	CG14818			FBgn0037016	CG13252	FBgn0036448	mop	FBgn0001311	kkv	FBgn0262100	CG42853	FBgn0262535	CG43089	FBgn0085335	CG34306	FBgn0038774	CG5023	FBgn0260996	CG42597
FBgn0022772	Orc1	FBgn0033836	CG18278	FBgn0033810	CG4646	FBgn0015721	king-tubby	FBgn0052075	CG32075	FBgn0085371	CG34342	FBgn0035762	CG8605	FBgn0039344	CG4582	FBgn0038876	CG5919	FBgn0010424	TpnC73F	FBgn0040257	Ugt86Dc	FBgn0036359	CG14105	FBgn0027080	Aats-tyr	FBgn0038346	CG14872	FBgn0038924	CG6028	FBgn0026878	CG4325			FBgn0045474	Gr77a	FBgn0036461	CG10006	FBgn0037321		FBgn0003997	W	FBgn0004910	Eip63F-1	FBgn0037323	CG2663	FBgn0067783	att-ORFA	FBgn0032971	ttm3
FBgn0050499	CG30499	FBgn0260475	CG30059	FBgn0040754	CG17059	FBgn0020312	CG4050	FBgn0020412	JIL-1	FBgn0010894	sinu	FBgn0035763	CG8602	FBgn0027508	tankyrase	FBgn0038894	CG15497	FBgn0036698	CG7724	FBgn0040259	Ugt86Da	FBgn0036367	CG10116	FBgn0263131	CG43373	FBgn0038354	CG5404	FBgn0038942	CG13862	FBgn0025624	CG4025			FBgn0040636	CG13255	FBgn0023174	Prosbeta2	FBgn0014342	mia	FBgn0011706	rpr	FBgn0004911	Eip63F-2	FBgn0037326	CG14669	FBgn0024944	Oamb	FBgn0051703	CG31703
FBgn0033195	CG1360	FBgn0033842	cbc	FBgn0011763	Dp	FBgn0002736	mago	FBgn0261813	CG42755	FBgn0029118	Sucb	FBgn0035765		FBgn0263118	tx	FBgn0038926	CG13409	FBgn0036711	CG13727	FBgn0040253	Ugt86Dg	FBgn0036390	CG13738	FBgn0004465	Su(P)	FBgn0038387	blp	FBgn0038945	CG5386	FBgn0005670	Cyp4d1			FBgn0037065	CG12974	FBgn0047178	CG32147	FBgn0044823	Spec2	FBgn0262969	CR43280	FBgn0035481	CG12605	FBgn0037330	mRpL44	FBgn0262185	mir-995	FBgn0040519	CG15219
FBgn0261385	scra	FBgn0033845	mars	FBgn0033815	CG4676	FBgn0034590	Magi	FBgn0036165	chrb	FBgn0035621	CG10591	FBgn0015298	Srp19	FBgn0039466	CG5521	FBgn0017397		FBgn0036717	CG13731	FBgn0040255	Ugt86De	FBgn0036449	bmm	FBgn0010223	Galpha73B	FBgn0038394	CG10264	FBgn0038973	Pebp1	FBgn0011576	Cyp4d2			FBgn0037067	Cpr78Ca	FBgn0036484	Pex3	FBgn0037350	CG2911	FBgn0040323	GNBP1	FBgn0024179	wit	FBgn0037380		FBgn0051199	CG31199	FBgn0032972	CG10834
FBgn0033199	CG17985	FBgn0033855	CG13333	FBgn0000119	arr	FBgn0034598	CG4266	FBgn0036169	Fuca	FBgn0035622	CG10590	FBgn0035771	sec63	FBgn0039479	CG14257	FBgn0038941	CG7080	FBgn0052183	Ccn	FBgn0040250	Ugt86Dj	FBgn0261090	Sytbeta	FBgn0036713	Mip	FBgn0038426	mRpS33	FBgn0038974	CG5377	FBgn0040336	Seipin			FBgn0037083	CG5656	FBgn0000565	Eip71CD	FBgn0037370	CG1236	FBgn0036848	CG10424	FBgn0052259	CG32259	FBgn0051555		FBgn0051200	CG31200	FBgn0032973	CG6675
FBgn0028687	Rpt1	FBgn0033859	CG6197	FBgn0040477	cid	FBgn0034606	ASPP	FBgn0036188	CG7339	FBgn0035626	lin-28	FBgn0053276	CG33276	FBgn0039500	CG5984	FBgn0038967	CG13847	FBgn0036769	Tsp74F	FBgn0040252	Ugt86Dh	FBgn0036466	CG18581	FBgn0036749	CG7460	FBgn0027109	npf	FBgn0260942	bond	FBgn0029648	CG3603			FBgn0086377	Syx7	FBgn0262893	CG43248	FBgn0027608	CG2082	FBgn0036849	CG14079	FBgn0011653	mas	FBgn0085316	CG34287	FBgn0027493	CG17273	FBgn0013348	TpnC41C
FBgn0033206	CG12042	FBgn0000662	fl(2)d	FBgn0004638	drk	FBgn0034611	MFS16	FBgn0036198	crim	FBgn0263106	DnaJ-1	FBgn0035827	Srp9	FBgn0039507	mrt	FBgn0038983	CG5326	FBgn0036789	AlCR2	FBgn0037870	CG18577	FBgn0036468	CG13461	FBgn0261997	CG42815	FBgn0022344	CG10340	FBgn0039031	CG17244	FBgn0010294	ng2			FBgn0015239	Hr78	FBgn0004396	CrebA	FBgn0026077	Gasp	FBgn0036858	CG14088	FBgn0035505	Teh2	FBgn0028436	ECSIT	FBgn0002921	Atpalpha	FBgn0084008	CR41443
FBgn0033209	CG12107	FBgn0262739	AGO1	FBgn0033845	mars	FBgn0050390	Sgf29	FBgn0011335	l(3)j2D3	FBgn0083044	snoRNA:Psi18S-1397	FBgn0041156	exex	FBgn0016061	side	FBgn0039008	CG6972	FBgn0001078	ftz-f1	FBgn0037895	CG6723	FBgn0036469	CG18649	FBgn0052188	CG32188	FBgn0038468	CG5225	FBgn0051052		FBgn0010295	ng3			FBgn0015283	Pros54	FBgn0087035	AGO2	FBgn0046876	Obp83ef	FBgn0036868	CG14087	FBgn0035508	CG15005	FBgn0026077	Gasp	FBgn0013995	Calx	FBgn0033020	CG10396
FBgn0033210	U2A	FBgn0033889	CG6701	FBgn0033846	mip120	FBgn0020306	dom	FBgn0036249	CG11560	FBgn0082994	snoRNA:Psi28S-1837c	FBgn0015793	Rab-RP3	FBgn0039527	CG5639	FBgn0039025	CG7023	FBgn0036817	CG6865	FBgn0037906	PGRP-LB	FBgn0036470	CG13463	FBgn0052189	CG32189	FBgn0051268	CG31268	FBgn0039049	CG6726	FBgn0002933	ng1			FBgn0037114	Cpr78E	FBgn0036509	CG7739	FBgn0260645	CG42537	FBgn0036874	brv1	FBgn0035512	Cpr64Ac	FBgn0037422	Osi13	FBgn0051189	CG31189	FBgn0050438	CG30438
FBgn0003733	tor	FBgn0033891	CG8067	FBgn0033855	CG13333	FBgn0082972	snoRNA:Psi28S-3316a	FBgn0022959	yps	FBgn0082995	snoRNA:Psi28S-1837b	FBgn0035909	ergic53	FBgn0039555	mRpS22	FBgn0039026	CG7029	FBgn0052204	CG32204	FBgn0037908	dpr5	FBgn0047178	CG32147	FBgn0036772	CG5290	FBgn0038474	mRpS11	FBgn0039068	CG13827	FBgn0003086	Pig1			FBgn0052448	CG32448	FBgn0036516	CG7656	FBgn0037442	CG10277	FBgn0036890	CG9368	FBgn0066365	dyl	FBgn0037424	Osi15	FBgn0051207	CG31207	FBgn0033027	TpnC4
FBgn0050496	CG30496	FBgn0020620	RN-tre	FBgn0033859	CG6197	FBgn0082971	snoRNA:Psi28S-3316b	FBgn0036254	CG5645	FBgn0086660	snoRNA:Psi28S-1837a	FBgn0260442	rhea	FBgn0003279	RpL4	FBgn0039038	CG6688	FBgn0036836	CG11619	FBgn0042110	CG18765	FBgn0004228	mex1	FBgn0036774	mRpS26	FBgn0051265	CG31265	FBgn0039094	CG10184	FBgn0003374	Sgs4			FBgn0020518	snoRNA:Me28S-G764	FBgn0004588	Eig71Ea	FBgn0037443	CG1021	FBgn0260874	Ir76a	FBgn0000038	nAcRbeta-64B	FBgn0037428	Osi18	FBgn0038849	CG7079	FBgn0033031	CG8245
FBgn0085245	CG34216	FBgn0033897	Rcd1	FBgn0086356	tum	FBgn0086669	snoRNA:Psi18S-841a	FBgn0036258	CG5642	FBgn0035639	CG5537	FBgn0262387	mir-190	FBgn0085391	CG34362	FBgn0039053	CG6738	FBgn0036851	CG14082	FBgn0037996	CG4830	FBgn0053985	CG33985	FBgn0036789	AlCR2	FBgn0038481	CG17475	FBgn0001098	Gdh	FBgn0261927	CG42794			FBgn0259697	nvd	FBgn0004589	Eig71Eb	FBgn0000552	Edg84A	FBgn0052221	CG32221	FBgn0035555	CG13720	FBgn0037429	Osi19	FBgn0038850	CG17279	FBgn0033047	CG7882
FBgn0050497	CG30497	FBgn0086895	pea	FBgn0086895	pea	FBgn0083018	snoRNA:Psi18S-841b	FBgn0000625	eyg	FBgn0035643	CG13287	FBgn0060292	snoRNA:U49:66Da	FBgn0051051	CG31051	FBgn0039064	CG4467	FBgn0036870	CG14095	FBgn0038007	Cyp313a3	FBgn0261681	CG42728	FBgn0036824	CG3902	FBgn0038482	CG4053	FBgn0039145	CG6000	FBgn0029795	CG15773			FBgn0040001	CG17374	FBgn0004590	Eig71Ec	FBgn0063127	pncr002:3R	FBgn0001324	kto	FBgn0261526	NT1	FBgn0037430	Osi20	FBgn0260004	Snmp1	FBgn0033056	CG7856
FBgn0015614	CanB2	FBgn0033901	O-fut1	FBgn0033899	CG13016	FBgn0083016	snoRNA:Psi18S-841d	FBgn0027936	vih	FBgn0052409	CG32409	FBgn0035916	GAPsec	FBgn0003137	Ppn	FBgn0039068	CG13827	FBgn0036871	CG14096	FBgn0042206	GstD10	FBgn0053983	obst-H	FBgn0086661	snoRNA:Psi28S-2566	FBgn0051266	CG31266	FBgn0039180	CG5715	FBgn0052750	CG32750			FBgn0058160	CG40160	FBgn0004591	Eig71Ed	FBgn0004783	Ccp84Aa	FBgn0052219	CG32219	FBgn0014073	Tie	FBgn0037433	CG17919	FBgn0038878	CG3301	FBgn0033063	CG14589
FBgn0033224	Nop17l	FBgn0033902	Tango7	FBgn0033901	O-fut1	FBgn0010415	Sdc	FBgn0002466	sti	FBgn0052407	CG32407	FBgn0035921	CG13305	FBgn0082974	snoRNA:Psi28S-3305c	FBgn0039085	CG10170	FBgn0052214	CG32214	FBgn0010040	GstD4	FBgn0036544	sff	FBgn0036825	RpL26	FBgn0051267	CG31267	FBgn0039309	CG11891	FBgn0052751	CG32751			FBgn0024804	Dbp80	FBgn0004593	Eig71Ef	FBgn0037465	CG1105	FBgn0053710	CG33710	FBgn0260657	CG42540	FBgn0037456	CG1138	FBgn0038880	SIFR	FBgn0033069	CG8335
FBgn0002891	mus205	FBgn0000289	cg	FBgn0033902	Tango7	FBgn0034631	CG10496	FBgn0262524	ver	FBgn0053993	CG33993	FBgn0035922	Pex7	FBgn0015589	Apc	FBgn0039087	CG10168	FBgn0052208	825-Oak	FBgn0010044	GstD8	FBgn0036556	CG5830	FBgn0036833	CG3819	FBgn0038485	CG5255	FBgn0051288	CG31288	FBgn0040069	vanin-like			FBgn0010225	Gel	FBgn0004594	Eig71Eg	FBgn0037472	CG10098	FBgn0261506	CG42654	FBgn0052238	CG32238	FBgn0051286	CG31286	FBgn0038879	CG17298	FBgn0033074	tomboy40
FBgn0003317	sax	FBgn0261270	SelD	FBgn0000289	cg	FBgn0003731	Egfr	FBgn0036299	Tsf2	FBgn0035656	CG10479	FBgn0011509	SrpRbeta	FBgn0039641	CG14511	FBgn0051414	CG31414	FBgn0036872	CG12519	FBgn0038034	Cyp9f3Psi	FBgn0036563	CG13075	FBgn0052204	CG32204	FBgn0038492	Mur89F	FBgn0051087	CG31087	FBgn0030009	CG15336			FBgn0037231	vps24	FBgn0014848	Eig71Eh	FBgn0002306	sas	FBgn0259148	CG42263	FBgn0035574	Gef64C	FBgn0037463	djl	FBgn0038890	CG7956	FBgn0033086	CG9410
FBgn0003082	phr	FBgn0033921	tej	FBgn0261270	SelD	FBgn0260720	CR42547	FBgn0036301	CG4069	FBgn0035677	CG13293	FBgn0035986	CG4022	FBgn0262404	mir-996	FBgn0039106	CG10301	FBgn0036873	CG18294	FBgn0038056	CG5961	FBgn0036575	CG5157	FBgn0036835	CG14075	FBgn0038507	CG5863	FBgn0039325	CG10560	FBgn0030013	GIIIspla2			FBgn0086608	CG34112	FBgn0014849	Eig71Ei	FBgn0037503	CG14598	FBgn0036926	CG7646	FBgn0035571	CG12493	FBgn0250732	gfzf	FBgn0038894	CG15497	FBgn0033090	CG15909
FBgn0263121	Prosalpha1	FBgn0033925	CG8617	FBgn0033929	Tfb1	FBgn0034654	CG10306	FBgn0015919	caup	FBgn0061492	loj	FBgn0082953	snoRNA:Psi28S-612	FBgn0004369	Ptp99A	FBgn0001205		FBgn0052213	CG32213	FBgn0250910	Octbeta3R	FBgn0036598	CG4982	FBgn0036853	mRpL21	FBgn0262003	CG42821	FBgn0051439	Muc96D	FBgn0030029	CG15343			FBgn0027570	Nep2	FBgn0262528	CG43082	FBgn0037515	Sp7	FBgn0001259	in	FBgn0052232	CG32232	FBgn0037483	CG14609	FBgn0003867	tsl	FBgn0033093	CG3270
FBgn0033229	CG12822	FBgn0033934	CG17385	FBgn0013725	phyl	FBgn0010228	HmgZ	FBgn0036306	CG10973	FBgn0005658	Ets65A	FBgn0036008	CG3408	FBgn0039665	CG2310	FBgn0085384	CG34355	FBgn0005564	Shal	FBgn0028374	hug	FBgn0036616	CG4893	FBgn0036857	CG9629	FBgn0262004	CG42822	FBgn0039349	Ssadh	FBgn0030041	CG12116			FBgn0051530	CG31530	FBgn0036527	CG7304	FBgn0051472	CG31472	FBgn0037023	CG3698	FBgn0035585	CG12027	FBgn0037487	CG14608	FBgn0038916	dnd	FBgn0014028	SdhB
FBgn0050377	CG30377	FBgn0024698	Cpsf160	FBgn0020245	ttv	FBgn0004362	HmgD	FBgn0262714	Sap130	FBgn0035687	CG13296	FBgn0086075	snoRNA:Me28S-G3253	FBgn0039681	CG7582	FBgn0016754	sba	FBgn0261341	verm	FBgn0262383	mir-284	FBgn0036622	CG4753	FBgn0052206	CG32206	FBgn0038519	Prx3	FBgn0028833	Dak1	FBgn0030073	CG10962			FBgn0037279	CG1129	FBgn0036529	pgant8	FBgn0037553	CG18249	FBgn0011591	fng	FBgn0035608	blanks	FBgn0037488	CG14607	FBgn0038922	CG6439	FBgn0040674	CG9445
FBgn0015509	lin19	FBgn0020245	ttv	FBgn0050077	blos1	FBgn0034657	LBR	FBgn0260965	CG42588	FBgn0022699	D19B	FBgn0002528	LanB2	FBgn0039686	CG15506	FBgn0051140	CG31140	FBgn0260653	serp	FBgn0005671	Vha55	FBgn0036627	Grp	FBgn0005564	Shal	FBgn0038525	CG14329	FBgn0085320	CG34291	FBgn0030097	CG12115			FBgn0004436	UbcD6	FBgn0036553	CG17027	FBgn0003129	Poxm	FBgn0053286	CG33286	FBgn0015766	Msr-110	FBgn0001112	Gld	FBgn0019960	CG6455	FBgn0066293	CheB42b
FBgn0026393	Or43b	FBgn0026427	Su(var)2-HP2	FBgn0026427	Su(var)2-HP2	FBgn0002715	mei-S332	FBgn0036340	SRm160	FBgn0035699	CG13300	FBgn0262439	mir-276a	FBgn0039704	neo	FBgn0000036	nAcRalpha-96Aa	FBgn0036934	sNPF-R	FBgn0002719	Men	FBgn0263131	CG43373	FBgn0022774	Oat	FBgn0038613	Vha100-4	FBgn0262577	CG43117	FBgn0030098	CG12057			FBgn0037291	CG14662	FBgn0261634	CG42717	FBgn0261108	Atg13	FBgn0037042	CG12984	FBgn0259167	CG42272	FBgn0262982	CG43290	FBgn0019957	ND42	FBgn0066292	CheB42c
FBgn0033233	Kdm4A	FBgn0033951	CG10139	FBgn0033951	CG10139	FBgn0025186	ari-2	FBgn0085457	CG34428	FBgn0020251	sfl	FBgn0052062	A2bp1	FBgn0051036	CG31036	FBgn0039264	CG11786	FBgn0036935	CG14186	FBgn0038084	beat-Vc	FBgn0026061	Mipp1	FBgn0261283	HLH106	FBgn0051229	CG31229	FBgn0039428	CG14237	FBgn0030105	CG15369			FBgn0037293	CG12007	FBgn0036566	ClC-c	FBgn0037612	CG8112	FBgn0037046	CG10581	FBgn0035657	alphaKap4	FBgn0037502	wa-cup	FBgn0003178	PyK	FBgn0053348	CheB42a
FBgn0050381	CG30381	FBgn0050476	ave	FBgn0050476	ave	FBgn0034716	Oatp58Dc	FBgn0010452	trn	FBgn0035721	CG9948	FBgn0262890	CG43245	FBgn0039734	Tace	FBgn0039282	Bili	FBgn0036936	CG14185	FBgn0051345	CG31345	FBgn0010223	Galpha73B	FBgn0036934	sNPF-R	FBgn0038645	CG7714	FBgn0039435	TwdlP	FBgn0054026	CG34026			FBgn0040682	CG14664	FBgn0036571	CG12272	FBgn0037618	CG11762	FBgn0015239	Hr78	FBgn0035669	CG6592	FBgn0051146	Nlg1	FBgn0053110	CG33110	FBgn0050157	CG30157
FBgn0023171	rnh1	FBgn0015602	BEAF-32	FBgn0015602	BEAF-32	FBgn0013272	Gp150	FBgn0002573	sens	FBgn0035722	CG10075	FBgn0013469	klu	FBgn0039738	Mgat2	FBgn0022800	Cad96Ca	FBgn0036937	Ir76b	FBgn0038087	beat-Va	FBgn0036697	rogdi	FBgn0036947	obst-F	FBgn0038646	CG7715	FBgn0039438	TwdlO	FBgn0259741	CG42395			FBgn0260462	CG12163	FBgn0036573		FBgn0037635	CG9837	FBgn0261953	AP-2	FBgn0262985	CG43293	FBgn0037521	CG2993	FBgn0039022	CG4725	FBgn0050156	CG30156
FBgn0026722	drosha	FBgn0027783	SMC2	FBgn0027783	SMC2	FBgn0085236	CG34207	FBgn0025874	Meics	FBgn0045759	bin	FBgn0036121	CG6310	FBgn0015542	sima	FBgn0039290	CG13654	FBgn0261556	CG42674	FBgn0038130	CG8630	FBgn0085279	CG34250	FBgn0036948	CG7298	FBgn0038676	CG6026	FBgn0039439	TwdlK	FBgn0052698	CG32698			FBgn0037304	CG1113	FBgn0036577	CG13073	FBgn0014018	Rel	FBgn0037107	CG7166	FBgn0262787	CG43168	FBgn0037529	mRpS9	FBgn0039023	CG4723	FBgn0033129	Tsp42Eh
FBgn0033236	CG14764	FBgn0033972	Ciao1	FBgn0033988	pcs	FBgn0034722	Rtf1	FBgn0036406	CG13484	FBgn0035751	CG14829	FBgn0010741	l(3)01239	FBgn0051028	CG31028	FBgn0039332	alrm	FBgn0036945	CG6981	FBgn0038135	CG8773	FBgn0052183	Ccn	FBgn0036949	CG7290	FBgn0038678	mRpL55	FBgn0039440	TwdlJ	FBgn0040941	CG15308			FBgn0037315	Cerk	FBgn0052155		FBgn0037675	HP1e	FBgn0052446	Atox1	FBgn0261801	CG42747	FBgn0010812	unc-45	FBgn0039024	CG4721	FBgn0033132	Tsp42Ej
FBgn0027548	nito	FBgn0022063	Pcf11	FBgn0033990	CG10265	FBgn0053200	ventrally-expressed-protein-D	FBgn0005592	btl	FBgn0024542	Neos	FBgn0036147	Plod	FBgn0039754	CG9747	FBgn0051323	CG31323	FBgn0036956	CG13813	FBgn0038136	CG8774	FBgn0036759	CG5577	FBgn0036951	CG7017	FBgn0262468	vib	FBgn0051080	TwdlH	FBgn0052687	CG32687			FBgn0041191	Rheb	FBgn0036587	CG4950	FBgn0014380	RhoL	FBgn0052447	CG32447	FBgn0052397		FBgn0262362	CG43060	FBgn0040588	CG13841	FBgn0033141	CG12831
FBgn0033244	CG8726	FBgn0013773	Cyp6a22	FBgn0015371	chn	FBgn0022984	qkr58E-3	FBgn0001085	fz	FBgn0035762	CG8605	FBgn0261813	CG42755	FBgn0039756	CG9743	FBgn0039419	CG12290	FBgn0036960	CG13814	FBgn0038140	CG8784	FBgn0036760	CG5567	FBgn0036952	CG6933	FBgn0038700	CG3734	FBgn0039443	TwdlS	FBgn0030251	CG2145			FBgn0037370	CG1236	FBgn0036623	CG4729	FBgn0037721	CG9427	FBgn0037127	CG14566	FBgn0035720	CG10077	FBgn0037546	CG7918	FBgn0085404	CG34375	FBgn0015038	Cyp9b1
FBgn0027054	CSN4	FBgn0033984	Lap1	FBgn0262954	Rpb12	FBgn0022986	qkr58E-1	FBgn0036428	CG9238	FBgn0035763	CG8602	FBgn0036165	chrb	FBgn0086664	snoRNA:Psi28S-2149	FBgn0053970	CG33970	FBgn0052225	CG32225	FBgn0040553	CG14374	FBgn0052196	CG32196	FBgn0036953	CG17145	FBgn0038701	CG18493	FBgn0026562	BM-40-SPARC	FBgn0030262	Vago			FBgn0028690	Rpn5	FBgn0028399	TMS1	FBgn0037727	CG8358	FBgn0037133	CG7370	FBgn0035730	CG17744	FBgn0037615	CG11760	FBgn0039040	CG13833	FBgn0033145	CG12828
FBgn0033247	Nup44A	FBgn0261854	aPKC	FBgn0033994	CG7544	FBgn0034734	CG4554	FBgn0040318	HGTX	FBgn0035765		FBgn0036168	CG7512	FBgn0083047	snoRNA:Psi18S-1377e	FBgn0263118	tx	FBgn0036984	CG13248	FBgn0038148	CG14377	FBgn0036789	AlCR2	FBgn0260393	CG17147	FBgn0038723	CG6195	FBgn0039473	CG17191	FBgn0259101	CG42249			FBgn0037378	CG2046	FBgn0028693	Rpn12	FBgn0037730	CG9444	FBgn0262737	mub	FBgn0023001	melt	FBgn0037613	Cks85A	FBgn0039048	CG17111	FBgn0002930	nec
FBgn0033257	CG8713	FBgn0033990	CG10265	FBgn0033998	row	FBgn0003175	px	FBgn0041604	dlp	FBgn0035767	CG8596	FBgn0036169	Fuca	FBgn0083049	snoRNA:Psi18S-1377c	FBgn0039429	CG14238	FBgn0036986	CG5282	FBgn0038159	CG14369	FBgn0036806	Cyp12c1	FBgn0036960	CG13814	FBgn0038730	CG6300	FBgn0039474	CG6283	FBgn0030310	PGRP-SA			FBgn0037396	CG11459	FBgn0002284	Pros26	FBgn0053105	p24-2	FBgn0015075	Ddx1	FBgn0263218	Dscam2	FBgn0083971	CG34135	FBgn0016119	ATPsyn-Cf6	FBgn0053140	CG33140
FBgn0033260	Cul-4	FBgn0033995	CG8090	FBgn0050081	Ir51b	FBgn0083004	snoRNA:Psi28S-1175b	FBgn0013263	Trl	FBgn0015298	Srp19	FBgn0003292	rt	FBgn0004606	zfh1	FBgn0263289	scrib	FBgn0037000	CG5130	FBgn0261818	CG42760	FBgn0036816	Indy	FBgn0052225	CG32225	FBgn0038731	CG11659	FBgn0039476	CG6271	FBgn0030338	CG15741			FBgn0037442	CG10277	FBgn0025558	CG4101	FBgn0085438	CG34409	FBgn0037169	CG11404	FBgn0053278	CG33278	FBgn0046874	Pif1B	FBgn0039102	SPE	FBgn0050385	CG30385
FBgn0050372	Asap1	FBgn0033998	row	FBgn0034000	CG11808	FBgn0083003	snoRNA:Psi28S-1175c	FBgn0029148	NHP2	FBgn0035771	sec63	FBgn0036196	CG11658	FBgn0020912	Ptx1	FBgn0039437	TwdlL	FBgn0037012	Rcd2	FBgn0261819	CG42761	FBgn0052204	CG32204	FBgn0036984	CG13248	FBgn0038804	CG10877	FBgn0039486	CG6074	FBgn0030362	regucalcin			FBgn0037477	CG14610	FBgn0017572	Mo25	FBgn0053208	Mical	FBgn0037171	CG14459	FBgn0261537	CG42661	FBgn0261015	Pif1A	FBgn0039112	CG10219	FBgn0050384	CG30384
FBgn0033264	Nup50	FBgn0034000	CG11808	FBgn0004698	mus210	FBgn0082925	snoRNA:Or-aca1	FBgn0026320	Tom	FBgn0035807	CG7492	FBgn0036198	crim	FBgn0046696	RNaseP:RNA	FBgn0039444	TwdlD	FBgn0037014	CG13251	FBgn0038160	CG9759	FBgn0052206	CG32206	FBgn0036990	mRpL15	FBgn0038808	Srp14	FBgn0040609	CG3348	FBgn0030367	Cyp311a1			FBgn0259172	rn	FBgn0036655	CG13031	FBgn0037779	CG12811	FBgn0027339	jim	FBgn0262984	CG43292	FBgn0037676	CG8861	FBgn0039161	CG13606	FBgn0033164	CG11112
FBgn0033266	Socs44A	FBgn0004698	mus210	FBgn0000996	dup	FBgn0034748	CG17807	FBgn0000216	Brd	FBgn0035824	CG8281	FBgn0036199	Bmcp	FBgn0051005	qless	FBgn0243586	Tb	FBgn0037015	cmpy	FBgn0003060	CG9757	FBgn0036875	CG9449	FBgn0036992	CG11796	FBgn0038810	Srp72	FBgn0039519	Cyp6a18	FBgn0030398	Cpr11B			FBgn0051496	CG31496	FBgn0036656	CG13026	FBgn0037788	CG3940	FBgn0037206	CG12768	FBgn0035795	CG16998	FBgn0037675	HP1e	FBgn0039208	Esyt2	FBgn0033165	CG11113
FBgn0260398	Pbp49	FBgn0034009	CG8155	FBgn0019968	Khc-73	FBgn0019949	Cdk9	FBgn0040296	Ocho	FBgn0035827	Srp9	FBgn0036202	CG6024	FBgn0039838	CG3669	FBgn0039448	TwdlQ	FBgn0259239	CG42337	FBgn0038161	CG9269	FBgn0036878	Cpr76Ba	FBgn0036997	CG5955	FBgn0038821	CG17267	FBgn0039537	CG5590	FBgn0030443	CG12715			FBgn0261508	CG42656	FBgn0043577	PGRP-SB2	FBgn0001321	knk	FBgn0052461	CG32461	FBgn0035800	CG7716	FBgn0000723	Fps85D	FBgn0039239	CG13641	FBgn0262583	CG43123
FBgn0033272	RagC	FBgn0000996	dup	FBgn0034032	CG8195	FBgn0034750	CG3732	FBgn0036459	CG3349	FBgn0041156	exex	FBgn0259140	CG42255	FBgn0085376	CG34347	FBgn0026562	BM-40-SPARC	FBgn0028427	Ilk	FBgn0038197	foxo	FBgn0005564	Shal	FBgn0052425	CG32425	FBgn0262185	mir-995	FBgn0082923	snoRNA:Or-aca3	FBgn0030492	CG15754			FBgn0037515	Sp7	FBgn0036659	CG9701	FBgn0025879	Timp	FBgn0028993	scro	FBgn0035802	CG33275	FBgn0037690	Task7	FBgn0051106	CG31106	FBgn0262948	CG43267
FBgn0033273	CG2183	FBgn0050467	CG30467	FBgn0013762	Cdk5	FBgn0261596	RpS24	FBgn0036476	CG6945	FBgn0262716	Arp66B	FBgn0083015	snoRNA:Psi18S-920	FBgn0039851	mey	FBgn0039466	CG5521	FBgn0037068	Cpr78Cb	FBgn0038199	CCHa1	FBgn0036890	CG9368	FBgn0037010	CG4825	FBgn0038829	CG17271	FBgn0039564	CG5527	FBgn0030509	CG11162			FBgn0037537	CG2767	FBgn0021768	nudC	FBgn0045443	mthl11	FBgn0040001	CG17374	FBgn0035816	CG13685	FBgn0014023	Rlc1	FBgn0039321	CG10550	FBgn0033167	CG1701
FBgn0011659	Mlh1	FBgn0034035	CG8207	FBgn0034035	CG8207	FBgn0020257	ppa	FBgn0262707	CTPsyn	FBgn0042112	mRpL36	FBgn0036242	CG6793	FBgn0039852	nyo	FBgn0039469	TwdlC	FBgn0037069	Cpr78Cc	FBgn0011582	DopR	FBgn0004852	Ac76E	FBgn0037015	cmpy	FBgn0038845	CG10827	FBgn0262588	CG43125	FBgn0030519	CG11151			FBgn0037538	CG3223	FBgn0036685	CG6664	FBgn0261053	Cad86C	FBgn0058160	CG40160	FBgn0260967	CG42590	FBgn0037721	CG9427	FBgn0039323	CG10559	FBgn0033168	CG11145
FBgn0033309	CG8735	FBgn0034046	tun	FBgn0261538	CG42662	FBgn0005631	robo	FBgn0036487	Prp31	FBgn0035849	ERR	FBgn0022959	yps	FBgn0039858	CycG	FBgn0039479	CG14257	FBgn0086913	Rab26	FBgn0051321	CG31321	FBgn0036926	CG7646	FBgn0037057	CG10512	FBgn0038871	CG3337	FBgn0039591	CG9988	FBgn0030544	CG13403			FBgn0037539	CG10435	FBgn0036690	Ilp8	FBgn0259740	CG42394	FBgn0000500	Dsk	FBgn0263219	Dscam4	FBgn0262477	FoxP	FBgn0039346	CG5079	FBgn0033174	CG11125
FBgn0022027	Vps25	FBgn0050085	CG30085	FBgn0050085	CG30085	FBgn0010660	Nup214	FBgn0036489	CG7011	FBgn0035854	CG8005	FBgn0013997	Nrx-IV	FBgn0039886	CG2003	FBgn0039507	mrt	FBgn0261258	rgn	FBgn0013767	Crz	FBgn0036934	sNPF-R	FBgn0037061	CG12975	FBgn0038886	CG6475	FBgn0039609	CG14529	FBgn0020508	Ag5r2			FBgn0001255	ImpE3	FBgn0036732	Oatp74D	FBgn0037856	CG4674	FBgn0037215	CG12582	FBgn0262361	CG43059	FBgn0037753	CG12947	FBgn0039358	CG5028	FBgn0261397	didum
FBgn0033315	beta3GalTII	FBgn0034051	Mlf	FBgn0053464		FBgn0034802	CG3800	FBgn0029114	Tollo	FBgn0035871	BI-1	FBgn0036266	CG5626	FBgn0029128	tyn	FBgn0260487	CG42534	FBgn0053288	CG33288	FBgn0038237	Pde6	FBgn0261556	CG42674	FBgn0027945	ppl	FBgn0038893	CG6353	FBgn0039613	CG14527	FBgn0030597	Eo			FBgn0037560	CR18228	FBgn0036740	CG6259	FBgn0042094	Adk3	FBgn0037228	CG1092	FBgn0035875	Cpr66Cb	FBgn0037754	CG8500	FBgn0039360	CLS	FBgn0033184	CG12736
FBgn0033316	CG14749	FBgn0034057	CG8314	FBgn0003425		FBgn0010622	l(2)06496	FBgn0036494	Toll-6	FBgn0035909	ergic53	FBgn0052105	CG32105	FBgn0029531	CG13362	FBgn0016061	side	FBgn0037122	CG14570	FBgn0038262	CG14857	FBgn0036945	CG6981	FBgn0086913	Rab26	FBgn0051343	CG31343	FBgn0039671	CG11470	FBgn0030615	Cyp4s3			FBgn0037592	CG11737	FBgn0036741	CG7510	FBgn0027584	CG4757	FBgn0027930	MP1	FBgn0001253	ImpE1	FBgn0037777	CG11722	FBgn0262904	CR43259	FBgn0033190	CG2137
FBgn0033317	CG8635	FBgn0034060	CG8370	FBgn0034049	bdg	FBgn0003062	Fib	FBgn0036500	CG7275	FBgn0017579	RpL14	FBgn0036279	Ncc69	FBgn0086368	tw	FBgn0039530	Tusp	FBgn0037123	CG14569	FBgn0038267	CG17304	FBgn0036948	CG7298	FBgn0261258	rgn	FBgn0051233	CG31233	FBgn0039674	CG1907	FBgn0030688	CG8952			FBgn0037612	CG8112	FBgn0052179	Krn	FBgn0037897	CG5270	FBgn0037235	CG1103	FBgn0035892	exo70	FBgn0037789	CG6208	FBgn0000206	boss	FBgn0050493	CG30493
FBgn0005695	gcl	FBgn0010590	Prosbeta1	FBgn0034050	CG8297	FBgn0065073	snoRNA:229	FBgn0036501	CG7272	FBgn0035916	GAPsec	FBgn0036291	CG10681	FBgn0260855	Sec22	FBgn0262286	mir-1001	FBgn0037124	CG14568	FBgn0028662	VhaPPA1-1	FBgn0052225	CG32225	FBgn0037097		FBgn0051198	CG31198	FBgn0039682	Obp99c	FBgn0001092	Gapdh2			FBgn0037623	CG9801	FBgn0065088	snmRNA:641	FBgn0037901	CG6744	FBgn0052944	CG32944	FBgn0052354	CG32354	FBgn0037796	CG12814	FBgn0051324	CG31324	FBgn0033216	CG1946
FBgn0086784	stmA	FBgn0034066	CG8397	FBgn0034054	CG8366	FBgn0003977	vir	FBgn0004396	CrebA	FBgn0035922	Pex7	FBgn0036294	CG10654	FBgn0259100		FBgn0067407	Or98P	FBgn0037125	CG14573	FBgn0038282	dpr9	FBgn0036978	Toll-9	FBgn0028663	VhaM9.7-b	FBgn0038923	mRpL35	FBgn0039697	CG7834	FBgn0030724	Nipsnap			FBgn0037635	CG9837	FBgn0036761	MED19	FBgn0051374	sals	FBgn0037284	CG14659	FBgn0262719	CG43163	FBgn0083943	CG34107	FBgn0039415	CG6142	FBgn0001091	Gapdh1
FBgn0033337	CG8272	FBgn0034071	CG8405	FBgn0034060	CG8370	FBgn0261786	mi	FBgn0036510	CG7427	FBgn0011509	SrpRbeta	FBgn0036299	Tsf2	FBgn0040348	CG3703	FBgn0039564	CG5527	FBgn0037129	CG14565	FBgn0038295	Gyc88E	FBgn0036984	CG13248	FBgn0037100	capaR	FBgn0038924	CG6028	FBgn0039719	CG15515	FBgn0030731	Mfe2			FBgn0037648	CG11975	FBgn0052194	CR32194	FBgn0051363	Jupiter	FBgn0037296	Prosbeta2R2	FBgn0060291	snoRNA:U49:66Db	FBgn0261928	CG42795	FBgn0039419	CG12290	FBgn0085390	Dgk
FBgn0021825	Dmn	FBgn0050094	CG30094	FBgn0034065	Rrp42	FBgn0010501	Dcp-1	FBgn0036514	CG12301	FBgn0086706	pix	FBgn0085271	CG34242	FBgn0259144	CG42259	FBgn0085391	CG34362	FBgn0037130	Syn1	FBgn0262483	Rbp	FBgn0086082	snoRNA:Or-CD11	FBgn0037121	Rpb8	FBgn0038945	CG5386	FBgn0003356	Jon99Cii	FBgn0030734	CG9911			FBgn0051100	CG31100	FBgn0085282	CG34253	FBgn0259227	CG42327	FBgn0037307	Tim17a2	FBgn0052029	Cpr66D	FBgn0262617	CG43143	FBgn0053970	CG33970	FBgn0085460	CG34431
FBgn0033339	sec31	FBgn0029175	Ext2	FBgn0029175	Ext2	FBgn0034878	pita	FBgn0036522	CG7372	FBgn0035947	Srp68	FBgn0015904	ara	FBgn0040398	CG14629	FBgn0051051	CG31051	FBgn0037139	CG14563	FBgn0051446	CG31446	FBgn0037012	Rcd2	FBgn0037140	CG7442	FBgn0038958	CG13857	FBgn0086355	Tpi	FBgn0030756	CG9903			FBgn0026380	Prosbeta3	FBgn0036813	Aut1	FBgn0037933	Ho	FBgn0037310	Tim17b1	FBgn0040828	CG13306	FBgn0037818	CG6465	FBgn0040608	CG14246	FBgn0033238	CG11165
FBgn0027513	ana2	FBgn0034084	CG8435	FBgn0034084	CG8435	FBgn0034879	Rrp4	FBgn0041160	comm2	FBgn0035951	CG5068	FBgn0015919	caup	FBgn0040360	CG14626	FBgn0003137	Ppn	FBgn0037177	CG14454	FBgn0038353	CG5399	FBgn0037013	CG13250	FBgn0004514	Oct-TyrR	FBgn0038961	CG13850	FBgn0039747	AdoR	FBgn0030774	spheroide			FBgn0010222	Nmdmc	FBgn0000261	Cat	FBgn0037960	mthl5	FBgn0037313	CG1161	FBgn0035928	CG13310	FBgn0262717	Skeletor	FBgn0004359	T48	FBgn0050378	CG30378
FBgn0033341	MrgBP	FBgn0034086	CG8441	FBgn0034086	CG8441	FBgn0015903	apt	FBgn0010105	comm	FBgn0005533	RpS17	FBgn0014007	Ptp69D	FBgn0025641	DAAM	FBgn0039594	CG9990	FBgn0037179	CG14453	FBgn0038354	CG5404	FBgn0037015	cmpy	FBgn0000100	RpLP0	FBgn0085317	CG34288	FBgn0002773	Mlc2	FBgn0030775	CG9673			FBgn0037672	sage	FBgn0036816	Indy	FBgn0013275	Hsp70Aa	FBgn0037321		FBgn0035936	Tsp66E	FBgn0037837	CG14693	FBgn0004842	NepYr	FBgn0033243	CG14763
FBgn0033342	CG8258	FBgn0034091	mrj	FBgn0262166	calypso	FBgn0034908	CG5543	FBgn0036537	CG18081	FBgn0082953	snoRNA:Psi28S-612	FBgn0036306	CG10973	FBgn0024366	CG11409	FBgn0024273	WASp	FBgn0052453	CG32453	FBgn0051292	CR31292	FBgn0259243	Pka-R1	FBgn0037165	CG11437	FBgn0038972	CG7054	FBgn0039777	Jon99Fii	FBgn0030776	CG4653			FBgn0037677	CG12951	FBgn0036846	MESR6	FBgn0013276	Hsp70Ab	FBgn0051550	CG31550	FBgn0011206	bol	FBgn0037849	CG4596	FBgn0039481	Cpr97Eb	FBgn0033248	Dic3
FBgn0002552	lin	FBgn0025519	fidipidine	FBgn0015925	csul	FBgn0021895	ytr	FBgn0036538	CG15715	FBgn0035993	Nf-YA	FBgn0052113	CG32113	FBgn0052813	CG32813	FBgn0039620	CG1443	FBgn0037197	CG13239	FBgn0013334	Sap47	FBgn0028427	Ilk	FBgn0037167	CG11425	FBgn0038973	Pebp1	FBgn0039780	PH4alphaNE1	FBgn0030777	CG9672			FBgn0262993	CR43301	FBgn0036877	CG9452	FBgn0260744	Tango9	FBgn0010772	Xe7	FBgn0004244	Rdl	FBgn0037857	Tengl4	FBgn0039483	CG14259	FBgn0028561	sut3
FBgn0033348	CG8247	FBgn0015925	csul	FBgn0034109	CG7747	FBgn0024234	gbb	FBgn0052150	CG32150	FBgn0036008	CG3408	FBgn0260965	CG42588	FBgn0013720	pck	FBgn0039647	CG14509	FBgn0037217	CG14636	FBgn0063649	CG6006	FBgn0012034	AcCoAS	FBgn0037171	CG14459	FBgn0038974	CG5377	FBgn0039787	CG9702	FBgn0030836	CG8664			FBgn0053936		FBgn0022774	Oat	FBgn0037972	CG10005	FBgn0027608	CG2082	FBgn0035970	CG4483	FBgn0037896	ninaG	FBgn0039485	CG17189	FBgn0033258	CG8712
FBgn0033349	CG8243	FBgn0034109	CG7747	FBgn0034118	Nup62	FBgn0025790	TBPH	FBgn0000212	brm	FBgn0010408	RpS9	FBgn0036317	CG10948	FBgn0023519	mRpL16	FBgn0051036	CG31036	FBgn0037227	TwdlV	FBgn0038407	CG6126	FBgn0037065	CG12974	FBgn0037175	CG14455	FBgn0039049	CG6726	FBgn0039800	Npc2g	FBgn0030837	CG8661			FBgn0014380	RhoL	FBgn0003744	trc	FBgn0260745	mfas	FBgn0037396	CG11459	FBgn0052040	CG32040	FBgn0053512	dpr4	FBgn0039492	CG6051	FBgn0010504	kermit
FBgn0033351	CG8235	FBgn0050096	CG30096	FBgn0262560	wcd	FBgn0034923	Upf3	FBgn0000115	Arf72A	FBgn0036099	CG11811	FBgn0082967	snoRNA:Psi28S-3327a	FBgn0026087		FBgn0039728	CG7896	FBgn0037228	CG1092	FBgn0038416	CG17930	FBgn0037068	Cpr78Cb	FBgn0037176	CG14456	FBgn0039094	CG10184	FBgn0039802	dj-1beta	FBgn0030882	GS			FBgn0260722	CR42549	FBgn0028695	Rpn1	FBgn0260746	Ect3	FBgn0046876	Obp83ef	FBgn0001229	Hsp67Bc	FBgn0037936	CG6908	FBgn0029155	Men-b	FBgn0050374	CR30374
FBgn0011300	babo	FBgn0034114	CG4282	FBgn0011260	Sema-2a	FBgn0034926		FBgn0260635	th	FBgn0262890	CG43245	FBgn0082966	snoRNA:Psi28S-3327b	FBgn0260432		FBgn0015542	sima	FBgn0037230	CG9780	FBgn0038420	CG10311	FBgn0086913	Rab26	FBgn0037186	CG11241	FBgn0039111	Plip	FBgn0015032	Cyp4c3	FBgn0052495	CG32495			FBgn0037710	CG9393	FBgn0036921	RhoGDI	FBgn0037999	CG4860	FBgn0261641	CG42724	FBgn0001223	Hsp22	FBgn0025821	I-t	FBgn0039525	CG5646	FBgn0033274	CG14757
FBgn0033374	CG13741	FBgn0034118	Nup62	FBgn0034158	CG5522	FBgn0034945	CG10904	FBgn0036565	CG5235	FBgn0036118	blos2	FBgn0086601	snoRNA:Psi28S-3327c	FBgn0262297	mir-2496	FBgn0051030	CG31030	FBgn0085386	CG34357	FBgn0038435	Gyc-89Da	FBgn0261258	rgn	FBgn0037204	CG11131	FBgn0001098	Gdh	FBgn0016123	Aph-4	FBgn0030914	CG6106			FBgn0051410	Npc2e	FBgn0036929	CG7668	FBgn0038003	CG3916	FBgn0037456	CG1138	FBgn0001225	Hsp26	FBgn0037950	HisCl1	FBgn0039530	Tusp	FBgn0050369	CG30369
FBgn0033380	Phax	FBgn0262560	wcd	FBgn0025830	IntS8	FBgn0034946	CG3065	FBgn0017453		FBgn0052069	CG32069	FBgn0085457	CG34428	FBgn0025632	CG4313	FBgn0051028	CG31028	FBgn0037273	CG14654	FBgn0038436	Gyc-89Db	FBgn0028663	VhaM9.7-b	FBgn0054031	CG34031	FBgn0005674	Aats-glupro	FBgn0039820	CG15554	FBgn0085359	CG34330			FBgn0040251	Ugt86Di	FBgn0036932	CG14184	FBgn0000455	Dip-C	FBgn0037466	CG1965	FBgn0001227	Hsp67Ba	FBgn0038001	CG17404	FBgn0002772	Mlc1	FBgn0033278	CG14759
FBgn0003612	Su(var)2-10	FBgn0034158	CG5522	FBgn0025832	Fen1	FBgn0034961	CG3163	FBgn0011016	SsRbeta	FBgn0036121	CG6310	FBgn0001256	ImpL1	FBgn0025625	Sik2	FBgn0039754	CG9747	FBgn0037304	CG1113	FBgn0038466	CG8907	FBgn0037100	capaR	FBgn0037222	CG14642	FBgn0039145	CG6000	FBgn0039827	CG1544	FBgn0030993	Mec2			FBgn0262972	CR43283	FBgn0024814	Clc	FBgn0038053	CG18549	FBgn0037472	CG10098	FBgn0035989	CG3967	FBgn0053098	CG33098	FBgn0039561	mfrn	FBgn0033279	CG2291
FBgn0027561	CG18659	FBgn0026533	Dek	FBgn0014870	Psi	FBgn0013764	Chi	FBgn0003741	tra	FBgn0010741	l(3)01239	FBgn0036352	CG14110	FBgn0040395	Unc-76	FBgn0039756	CG9743	FBgn0010399	Nmdar1	FBgn0051265	CG31265	FBgn0037123	CG14569	FBgn0085334	CG34305	FBgn0051133	Slimp	FBgn0039849	CG11334	FBgn0260871	CG42581			FBgn0037901	CG6744	FBgn0250791	Snap	FBgn0013277	Hsp70Ba	FBgn0262149	CR42875	FBgn0036040	CG6749	FBgn0038052	CG5538	FBgn0053203	CG33203	FBgn0033280	CG12126
FBgn0015477	Rme-8	FBgn0014870	Psi	FBgn0028737	Ef1beta	FBgn0034964	IntS1	FBgn0004556	Dbp73D	FBgn0036126	CG6272	FBgn0262350		FBgn0011276	HLH3B	FBgn0039758	CG9737	FBgn0037340	CG14671	FBgn0038510	CG14331	FBgn0037129	CG14565	FBgn0037232	CG9791	FBgn0039175	CG5706	FBgn0039872	salt	FBgn0085360	CG34331			FBgn0262081	Csk	FBgn0036974	eRF1	FBgn0051354	Hsp70Bbb	FBgn0002306	sas	FBgn0044051	Ilp1	FBgn0038076	Cyp313a4	FBgn0259220	Doa	FBgn0050376	CG30376
FBgn0002567	ltd	FBgn0028737	Ef1beta	FBgn0034176	ste24a	FBgn0028552	gammaSnap	FBgn0004108	Nrt	FBgn0036135	mRpL2	FBgn0043550	Tsp68C	FBgn0028369	kirre	FBgn0051004	CG31004	FBgn0261261	plx	FBgn0085310	CG34281	FBgn0037133	CG7370	FBgn0037239	CG11739	FBgn0039180	CG5715	FBgn0017448	CG2187	FBgn0022770	Peritrophin-A			FBgn0037933	Ho	FBgn0036975	CG5618	FBgn0013278	Hsp70Bb	FBgn0259172	rn	FBgn0044328	CG32052	FBgn0038087	beat-Va	FBgn0039629	CG11842	FBgn0033283	CG11635
FBgn0033391	CG8026	FBgn0034172	CG6665	FBgn0026402	NiPp1	FBgn0034970	yki	FBgn0025582	Int6	FBgn0064766	CG7600	FBgn0036381	CG8745	FBgn0061173	fd3F	FBgn0051005	qless	FBgn0037386	CG1208	FBgn0038527	CG14324	FBgn0037139	CG14563	FBgn0085386	CG34357	FBgn0261993	CG42811	FBgn0039877	CG2118	FBgn0025814	Mgstl			FBgn0260744	Tango9	FBgn0001259	in	FBgn0013279	Hsp70Bc	FBgn0262982	CG43290	FBgn0052050		FBgn0038122	CG8138	FBgn0039635	CG11876	FBgn0050365	spaw
FBgn0033392	CG8027	FBgn0034176	ste24a	FBgn0034186	CG8950	FBgn0023081	gek	FBgn0036696	CG14057	FBgn0261813	CG42755	FBgn0042630	Sox21b	FBgn0029681	CG15239	FBgn0039838	CG3669	FBgn0083949	CG34113	FBgn0038528	CG14326	FBgn0004514	Oct-TyrR	FBgn0051530	CG31530	FBgn0261994	CG42812	FBgn0058198	CG40198	FBgn0031178	CG10918			FBgn0037975	CG3397	FBgn0036980	RhoBTB	FBgn0038065	Snx3	FBgn0015574	alpha-Est6	FBgn0085411	CG34382	FBgn0038123	CG8508	FBgn0014869	Pglym78	FBgn0050364	hubl
FBgn0050343	CG30343	FBgn0034181	CG8963	FBgn0034210	CG6568	FBgn0034975	enok	FBgn0015550	tap	FBgn0036169	Fuca	FBgn0013718	nuf	FBgn0262973		FBgn0039858	CycG	FBgn0046878	Obp83cd	FBgn0262794	CG43175	FBgn0037163	laza	FBgn0037273	CG14654	FBgn0053341	CG33341	FBgn0005666	bt					FBgn0038037	Cyp9f2	FBgn0036988	CG5262	FBgn0011745	Arp87C	FBgn0015831	Rtnl2	FBgn0000451	ect	FBgn0000024	Ace	FBgn0039656	CG11951	FBgn0250827	whip
FBgn0033401	CG1968	FBgn0086350	tef	FBgn0021818	cnk	FBgn0041706	CG3253	FBgn0053052	CG33052	FBgn0036188	CG7339	FBgn0001085	fz	FBgn0029692		FBgn0039862	kek6	FBgn0037408	NPFR1	FBgn0038541	TyrRII	FBgn0037176	CG14456	FBgn0085335	CG34306	FBgn0039194	CG13614	FBgn0087002	Rfabg					FBgn0000455	Dip-C	FBgn0036993	CG5910	FBgn0038079	CG14394	FBgn0037525	CG17816	FBgn0036075	CG8065	FBgn0040551	CG11686	FBgn0039667	CG2010	FBgn0050363	cola
FBgn0026326	Mad1	FBgn0016697	Prosalpha5	FBgn0022029	l(2)k01209	FBgn0021875	Zfrp8	FBgn0036725	CG18265	FBgn0036194	CG11652	FBgn0036428	CG9238	FBgn0000635	Fas2	FBgn0039883	RhoGAP100F	FBgn0037410	Osi2	FBgn0053547	Rim	FBgn0037177	CG14454	FBgn0041707	7B2	FBgn0039196	CG17781	FBgn0025837	CG17636					FBgn0086134	Pros25	FBgn0037007	CG5059	FBgn0038100	Paip2	FBgn0262362	CG43060	FBgn0011569	can	FBgn0038132	CG15887	FBgn0039681	CG7582	FBgn0050366	swif
FBgn0028408	Drep-2	FBgn0021818	cnk	FBgn0034214	CG6550	FBgn0026169	snoRNA:Psi18S-1820	FBgn0004401	Pep	FBgn0261353	CG42630	FBgn0036433	CG9628	FBgn0000179	bi	FBgn0039886	CG2003	FBgn0037436	Hr83	FBgn0038595	CG7142	FBgn0037179	CG14453	FBgn0037328	RpL35A	FBgn0039198	CG5768	FBgn0262811	CG43182					FBgn0038053	CG18549	FBgn0037013	CG13250	FBgn0041710	yellow-f	FBgn0037556	CG9636	FBgn0262592	CG43127	FBgn0259831	CG34309	FBgn0013972	Gycalpha99B	FBgn0050362	boly
FBgn0016970	l(2)k10201	FBgn0034215	CG4802	FBgn0025716	Bap55	FBgn0034987	CG3363	FBgn0052177	Ndfip	FBgn0036198	crim	FBgn0041604	dlp	FBgn0029709	CHOp24	FBgn0027341	Gfat1	FBgn0037448	CG15186	FBgn0038606	CG15803	FBgn0052453	CG32453	FBgn0010399	Nmdar1	FBgn0039199	CG13615	FBgn0023537	CG17896					FBgn0011745	Arp87C	FBgn0037016	CG13252	FBgn0038126	CG8483	FBgn0037572	CG11698	FBgn0085267	CG34238	FBgn0038143	CG9813	FBgn0039684	Obp99d	FBgn0033285	CG18449
FBgn0029092	ced-6	FBgn0025716	Bap55	FBgn0034217	Lhr	FBgn0005636	nvy	FBgn0036745	CG7484	FBgn0036199	Bmcp	FBgn0013263	Trl	FBgn0011277	HLH4C	FBgn0053978	CG33978	FBgn0053202	dpr11	FBgn0038613	Vha100-4	FBgn0037212	nAcRalpha-80B	FBgn0015324	Vha26	FBgn0039200	CG13616	FBgn0023535	arg					FBgn0038079	CG14394	FBgn0045474	Gr77a	FBgn0000024	Ace	FBgn0037612	CG8112	FBgn0036089	CG14151	FBgn0038144	CG8870	FBgn0039689	CG7598	FBgn0033286	CG2127
FBgn0259234	Camta	FBgn0027506	EDTP	FBgn0263233	robls54B	FBgn0035021	CG4622	FBgn0052182	CG32182	FBgn0036213	RpL10Ab	FBgn0036466	CG18581	FBgn0086911	rg	FBgn0039908	Asator	FBgn0002522	lab	FBgn0028670	Vha100-2	FBgn0058298	CG40298	FBgn0037351	RpL13A	FBgn0051126	CG31126	FBgn0025620	CG13360					FBgn0038083	CG5999	FBgn0086377	Syx7	FBgn0038128	Ravus	FBgn0037635	CG9837	FBgn0260644	CG42536	FBgn0044511	mRpS21	FBgn0020235	ATPsyn-gamma	FBgn0033287	CG8701
FBgn0085436	Not1	FBgn0028953	CG14478	FBgn0024196	robl	FBgn0035059	CG3894	FBgn0036754	CG5589	FBgn0083015	snoRNA:Psi18S-920	FBgn0014002	Pdi	FBgn0029771	CG12730	FBgn0004624		FBgn0004777	Ccp84Ag	FBgn0038641	CG7708	FBgn0058470	CG40470	FBgn0260002	snoRNA:Me28S-U2134b	FBgn0011336	OstStt3	FBgn0040340	TRAM					FBgn0040493	grsm	FBgn0037094	CG7611	FBgn0038129	CG8449	FBgn0037659	Kdm2	FBgn0260643	CG42535	FBgn0041711	yellow-e	FBgn0001297	kay	FBgn0015034	Cyp4e1
FBgn0033427	CG1868	FBgn0022987	qkr54B	FBgn0028953	CG14478	FBgn0035060	Eps-15	FBgn0036765	CG7408	FBgn0036237	viaf	FBgn0047178	CG32147	FBgn0029775		FBgn0024989	CG3777	FBgn0004779	Ccp84Ae	FBgn0000303	Cha	FBgn0044510	mRpS5	FBgn0037354	CG12171	FBgn0039272	CG11836	FBgn0040349	CG3699					FBgn0038100	Paip2	FBgn0015283	Pros54	FBgn0038147	CCHa2	FBgn0037675	HP1e	FBgn0083068	pncr011:3L	FBgn0000046	Act87E	FBgn0039742	CG15528	FBgn0002570	Mal-A1
FBgn0261016	clos	FBgn0034237	eIF3-S9	FBgn0034231	Apc10	FBgn0035063	Eap	FBgn0015946	grim	FBgn0041096	rols	FBgn0004396	CrebA	FBgn0046687	Tre1	FBgn0262810	CG43181	FBgn0004780	Ccp84Ad	FBgn0038653	CG18208	FBgn0058178	CG40178	FBgn0051548	CG31548	FBgn0051106	CG31106	FBgn0040350	CG3690					FBgn0041710	yellow-f	FBgn0052446	Atox1	FBgn0262323	mir-252	FBgn0011740	alpha-Man-II	FBgn0052082	CG32082	FBgn0002937	ninaB	FBgn0082983	snoRNA:Psi28S-2626	FBgn0002569	Mal-A2
FBgn0050005	CG30005	FBgn0263113	CG43370	FBgn0034232	CG4866	FBgn0262902	CR43257	FBgn0036786	skl	FBgn0036271	Pbgs	FBgn0036531	CG6244	FBgn0029804	CG3097	FBgn0052815	CG32815	FBgn0004781	Ccp84Ac	FBgn0261113	Xrp1	FBgn0028697	RpL15	FBgn0037356	CG12170	FBgn0039305	CG11858	FBgn0014903	CG14630					FBgn0038110	CG8031	FBgn0027339	jim	FBgn0038179	CG9312	FBgn0037705	mura	FBgn0036153	CG7573	FBgn0038186	CG14362	FBgn0039773	CG2224	FBgn0050360	Mal-A6
FBgn0023143	Uba1	FBgn0034240	MESR4	FBgn0034237	eIF3-S9	FBgn0023181	Orc4	FBgn0052202	CG32202	FBgn0052105	CG32105	FBgn0261722	fwe	FBgn0029807	CG3108	FBgn0040348	CG3703	FBgn0004782	Ccp84Ab	FBgn0051221	CG31221	FBgn0037222	CG14642	FBgn0037358	elm	FBgn0039315	CG13658	FBgn0025393	CG14795					FBgn0038113	CG11668	FBgn0037203	slif	FBgn0000454	Dip-B	FBgn0037712	CG16789	FBgn0036155	CG6163	FBgn0038280	CG14861	FBgn0027654	jdp	FBgn0033296	Mal-A7
FBgn0050001	CG30001	FBgn0034249	RhoGAP54D	FBgn0028382	cyp33	FBgn0035073	CG16896	FBgn0085284	blos3	FBgn0036277	CG10418	FBgn0036544	sff	FBgn0029830	Grip	FBgn0040360	CG14626	FBgn0004783	Ccp84Aa	FBgn0038720	CG6231	FBgn0041605	cpx	FBgn0037380		FBgn0051288	CG31288	FBgn0023507	CG3835					FBgn0038139	CG8795	FBgn0259697	nvd	FBgn0038198	Npc2b	FBgn0262477	FoxP	FBgn0036156	CG11726	FBgn0038281	RpL10Aa	FBgn0039807	CG15546	FBgn0033297	Mal-A8
FBgn0033449	CG1663	FBgn0029079	icln	FBgn0034240	MESR4	FBgn0085442	NKAIN	FBgn0002945	nkd	FBgn0036279	Ncc69	FBgn0036556	CG5830	FBgn0029834	CG5937	FBgn0040359	CG11380	FBgn0037487	CG14608	FBgn0026753	Vha13	FBgn0037239	CG11739	FBgn0083949	CG34113	FBgn0051087	CG31087	FBgn0004654	Pgd					FBgn0041711	yellow-e	FBgn0028993	scro	FBgn0262808	CG43179	FBgn0003886	alphaTub85E	FBgn0053267	CG33267	FBgn0038285	CG6974	FBgn0010015	CanA1	FBgn0033304	Cyp6a13
FBgn0033450	Lsm11	FBgn0050105	CG30105	FBgn0034242	CG14480	FBgn0001147	gsb-n	FBgn0016797	fz2	FBgn0036282	Smyd4	FBgn0036567	CG13074	FBgn0029838	CG4666	FBgn0040367	CG11382	FBgn0028400	Syt4	FBgn0038734	CG11453	FBgn0085386	CG34357	FBgn0046878	Obp83cd	FBgn0039325	CG10560	FBgn0023525	CG3191					FBgn0038166	CG9588	FBgn0040001	CG17374	FBgn0038221	CG3259	FBgn0037736	CG12950	FBgn0053490	CG33490	FBgn0003721	Tm1	FBgn0010808	l(3)03670	FBgn0262812	CG43183
FBgn0033453	CG1667	FBgn0029006	lack	FBgn0034243	ns2	FBgn0001148	gsb	FBgn0017578	Max	FBgn0000625	eyg	FBgn0011016	SsRbeta	FBgn0029864	CG15894	FBgn0024366	CG11409	FBgn0083963	CG34127	FBgn0038740	CG4562	FBgn0051531		FBgn0037408	NPFR1	FBgn0051437	CG31437	FBgn0029639	CG14419					FBgn0038173	Adgf-C	FBgn0058160	CG40160	FBgn0086901	cv-c	FBgn0085438	CG34409	FBgn0036196	CG11658	FBgn0004117	Tm2	FBgn0000313	chp	FBgn0263120	Acsl
FBgn0023180	Orc6	FBgn0004400	rhi	FBgn0034249	RhoGAP54D	FBgn0001325	Kr	FBgn0262027	CR42838	FBgn0036294	CG10654	FBgn0036573		FBgn0029866	CG3842	FBgn0024361	Tsp2A	FBgn0037513	pyd3	FBgn0038750	CG4465	FBgn0085335	CG34306	FBgn0037439	CG10286	FBgn0039349	Ssadh	FBgn0025643	CG3588					FBgn0260226	CG42500	FBgn0024804	Dbp80	FBgn0038243	CG8066	FBgn0037754	CG8500	FBgn0085449	CG34420	FBgn0000047	Act88F	FBgn0039830	CG1746	FBgn0050354	CG30354
FBgn0023175	Prosalpha7	FBgn0034258	eIF3-S8	FBgn0050105	CG30105	FBgn0035099	CG6845	FBgn0036886	CG9300	FBgn0036298	nst	FBgn0036579	CG5027	FBgn0062413	Ctr1A	FBgn0024897	b6	FBgn0037519	CG3014	FBgn0040571	CG17193	FBgn0037326	CG14669	FBgn0053202	dpr11	FBgn0039357	CG4743	FBgn0029645	CG14422					FBgn0038214	CG9616	FBgn0010225	Gel	FBgn0038250	CG3505	FBgn0053208	Mical	FBgn0036218	CG14128	FBgn0038359	CG5614	FBgn0010217	ATPsyn-beta	FBgn0050355	CG30355
FBgn0050010	CG30010	FBgn0003545	sub	FBgn0029006	lack	FBgn0083992	Mkp	FBgn0036888	CG9330	FBgn0036299	Tsf2	FBgn0036621	roq	FBgn0029897	RpL17	FBgn0025391	Scgdelta	FBgn0243512	puc	FBgn0038774	CG5023	FBgn0051547	CG31547	FBgn0262174	mir-993	FBgn0028833	Dak1	FBgn0029648	CG3603					FBgn0038260	CG14855	FBgn0262214	mir-929	FBgn0051314	Neu3	FBgn0037788	CG3940	FBgn0036221	CG11588	FBgn0038363	Acyp2	FBgn0029529	CG13365	FBgn0033322	CG8584
FBgn0033460	sec24	FBgn0034277	CG6370	FBgn0004400	rhi	FBgn0000541	E(bx)	FBgn0010417	Taf6	FBgn0015904	ara	FBgn0004569	aos	FBgn0259228	C3G	FBgn0025631	moody	FBgn0260386	mtg	FBgn0083975	CG34139	FBgn0010399	Nmdar1	FBgn0024289	Sodh-1	FBgn0039406	RpL34a	FBgn0010294	ng2					FBgn0051183	CG31183	FBgn0037231	vps24	FBgn0038279	CG3837	FBgn0037802	Sirt6	FBgn0041096	rols	FBgn0026059	Mhcl	FBgn0040343	CG3713	FBgn0033323	CG12376
FBgn0050007	CG30007	FBgn0028744	CG5033	FBgn0034258	eIF3-S8	FBgn0035120	wac	FBgn0036896	wnd	FBgn0015919	caup	FBgn0040512	zetaCOP	FBgn0086693	iav	FBgn0040395	Unc-76	FBgn0020249	stck	FBgn0027493	CG17273	FBgn0037340	CG14671	FBgn0065099	snRNA:7SK	FBgn0051086	CG31086	FBgn0002933	ng1					FBgn0038404	CG8925	FBgn0037235	CG1103	FBgn0028984	Spn5	FBgn0051406	CG31406	FBgn0036259	CG9760	FBgn0038405	CG8927	FBgn0053082	CG33082	FBgn0050357	CG30357
FBgn0033467	CG15863	FBgn0003701	thr	FBgn0034264	CG10933	FBgn0052344	CG32344	FBgn0040786	CG14104	FBgn0036335	mRpL20	FBgn0036678	CG11905	FBgn0004198	ct	FBgn0261451	trol	FBgn0259182		FBgn0038832	CG15695	FBgn0015324	Vha26	FBgn0261508	CG42656	FBgn0051081	TwdlR	FBgn0010296	ng4					FBgn0038431	CG10405	FBgn0037279	CG1129	FBgn0038325	CG6194	FBgn0261053	Cad86C	FBgn0052111	CG32111	FBgn0051287	CG31287	FBgn0024986	CG3719	FBgn0050356	CG30356
FBgn0261014	TER94	FBgn0034282	Mapmodulin	FBgn0034266	CG4975	FBgn0052343	Atac3	FBgn0036916	Mtr3	FBgn0260441	RpS12	FBgn0015550	tap	FBgn0029504	CHES-1-like	FBgn0029690	CG6414	FBgn0259181		FBgn0038839	CG10830	FBgn0037354	CG12171	FBgn0083963	CG34127	FBgn0039443	TwdlS	FBgn0003086	Pig1					FBgn0250754	CG42232	FBgn0004436	UbcD6	FBgn0263040	CG43335	FBgn0259740	CG42394	FBgn0052110	CG32110	FBgn0259917	CG42446	FBgn0026872	CG14777	FBgn0086784	stmA
FBgn0033473	CG12128	FBgn0062440	CG17680	FBgn0003545	sub	FBgn0262139	trh	FBgn0036922	CG14182	FBgn0082967	snoRNA:Psi28S-3327a	FBgn0036725	CG18265	FBgn0262979	CG43287	FBgn0262973		FBgn0051259	CG31259	FBgn0051191	CG31191	FBgn0037358	elm	FBgn0085413	CG34384	FBgn0243586	Tb	FBgn0040907	mRpL33					FBgn0028381	decay	FBgn0037291	CG14662	FBgn0263041	CG43336	FBgn0037843	CG4511	FBgn0036317	CG10948	FBgn0038422	CG14880	FBgn0029580	CG14778	FBgn0033330	CG8746
FBgn0033474	CG1407	FBgn0022238	lolal	FBgn0034275	CG5002	FBgn0263042	CG43337	FBgn0261574	kug	FBgn0082966	snoRNA:Psi28S-3327b	FBgn0052177	Ndfip	FBgn0029955	CG15478	FBgn0029692		FBgn0037627	CG13318	FBgn0038845	CG10827	FBgn0051555		FBgn0037529	mRpS9	FBgn0039448	TwdlQ	FBgn0029811	Cpr5C					FBgn0038446	CG14903	FBgn0037293	CG12007	FBgn0038353	CG5399	FBgn0037856	CG4674	FBgn0036323	CG14118	FBgn0038423	CG10317	FBgn0052808	CG32808	FBgn0050350	CG30350
FBgn0033475	CG12129	FBgn0003022	Ote	FBgn0034277	CG6370	FBgn0035148	CG3402	FBgn0036958	CG17233	FBgn0036342	CG11279	FBgn0052179	Krn	FBgn0004657	mys	FBgn0025613	CG3081	FBgn0037646	CAHbeta	FBgn0000083	AnnIX	FBgn0083949	CG34113	FBgn0037543	CG10903	FBgn0039453	CG6403	FBgn0052751	CG32751					FBgn0015011	Ahcy89E	FBgn0040682	CG14664	FBgn0038365	CG9593	FBgn0027584	CG4757	FBgn0036324	CG12520	FBgn0022344	CG10340	FBgn0000667	Actn	FBgn0033344	CG8252
FBgn0262169	magu	FBgn0010575	sbb	FBgn0028741	fab1	FBgn0035149	MED30	FBgn0036964	CG6480	FBgn0085457	CG34428	FBgn0036749	CG7460	FBgn0029995	CG2256	FBgn0086911	rg	FBgn0261552	ps	FBgn0025803		FBgn0046878	Obp83cd	FBgn0037546	CG7918	FBgn0039470	CG6296	FBgn0029848	Btd					FBgn0038463	CG3534	FBgn0260462	CG12163	FBgn0038366	CG4576	FBgn0051144	CR31144	FBgn0036325	CG10752	FBgn0038451	CG14893	FBgn0023540	CG3630	FBgn0003074	Pgi
FBgn0033479	CG2292	FBgn0034321	CG14502	FBgn0028744	CG5033	FBgn0035152	CG3386	FBgn0036967	CG6597	FBgn0010452	trn	FBgn0036752	Adgf-A	FBgn0030011	Gbeta5	FBgn0010014	CanB	FBgn0037698	CG16779	FBgn0038866	CG5810	FBgn0037408	NPFR1	FBgn0037561	CG9630	FBgn0040609	CG3348	FBgn0029854	CG3566					FBgn0028992	sds22	FBgn0013576	mtd	FBgn0038398	sxe2	FBgn0037885	CG17721	FBgn0036327	CG10748	FBgn0015008	Actn3	FBgn0025839	CG3621	FBgn0085248	CG34219
FBgn0033486	CG11866	FBgn0034322	CG18536	FBgn0003701	thr	FBgn0035157	CG13894	FBgn0024887	kin17	FBgn0036352	CG14110	FBgn0052187	CG32187	FBgn0030017	CG2278	FBgn0029771	CG12730	FBgn0000244	by	FBgn0038873	CG5892	FBgn0053202	dpr11	FBgn0040529	CG9603	FBgn0039537	CG5590	FBgn0259204	CG42308					FBgn0025456	CREG	FBgn0250746	Prosbeta7	FBgn0038405	CG8927	FBgn0026063	KP78b	FBgn0083978	CG17672	FBgn0004577	Pxd	FBgn0023525	CG3191	FBgn0033353	CG13749
FBgn0033491	CG18011	FBgn0034345	CG5174	FBgn0034282	Mapmodulin	FBgn0035158	CG13895	FBgn0083120	Uhg8	FBgn0042630	Sox21b	FBgn0036773	CG13698	FBgn0261873	sdt	FBgn0259150	CG42265	FBgn0037705	mura	FBgn0051233	CG31233	FBgn0026565	CG1315	FBgn0259181		FBgn0039564	CG5527	FBgn0029969	CG10932					FBgn0085308	CG34279	FBgn0037315	Cerk	FBgn0086370	sra	FBgn0051374	sals	FBgn0036343	CG14115	FBgn0038474	mRpS11	FBgn0029608	CG3091	FBgn0053199	CG33199
FBgn0028426	JhI-1	FBgn0261119	Prp19	FBgn0034299	CG5757	FBgn0000575	emc	FBgn0082949	snoRNA:Me18S-U1356a	FBgn0040318	HGTX	FBgn0015946	grim	FBgn0030027	CG1632	FBgn0029820	CG16721	FBgn0051352	Unc-115a	FBgn0051198	CG31198	FBgn0262424	mir-10	FBgn0051450	mRpS18A	FBgn0039565	CG4884	FBgn0029994	CG2254					FBgn0053333	CG33333	FBgn0037321		FBgn0040071	tara	FBgn0037910	CG14708	FBgn0053262	CG33262	FBgn0038511	CG5873	FBgn0000092	CG2650	FBgn0033364	CG13747
FBgn0261698	CG42732	FBgn0050122	CG30122	FBgn0003520	stau	FBgn0035162	CG13900	FBgn0037009	CG5104	FBgn0036433	CG9628	FBgn0036786	skl	FBgn0021767	org-1	FBgn0029834	CG5937	FBgn0003886	alphaTub85E	FBgn0038901	burs	FBgn0261508	CG42656	FBgn0261929	CG42796	FBgn0003890	betaTub97EF	FBgn0030041	CG12116					FBgn0262023	CG42834	FBgn0051547	CG31547	FBgn0038412	Zip3	FBgn0037916	CG5342	FBgn0040814	CG14113	FBgn0038516	CG5840	FBgn0029664	CG10802	FBgn0033371	CNT1
FBgn0033519	CG11825	FBgn0034380	CG15087	FBgn0062440	CG17680	FBgn0028999	nerfin-1	FBgn0001320	kni	FBgn0013263	Trl	FBgn0036787	CG4306	FBgn0030040	CG15347	FBgn0029836	CG5928	FBgn0028401	Snap24	FBgn0038929	CG13408	FBgn0015577	alpha-Est9	FBgn0037602	CG8021	FBgn0039613	CG14527	FBgn0086450	su(r)					FBgn0262024	CG42835	FBgn0082962	snoRNA:Psi28S-3385a	FBgn0040271	Sulf1	FBgn0051363	Jupiter	FBgn0036351	CG14107	FBgn0038519	Prx3	FBgn0044046	Ilp7	FBgn0082942	snoRNA:Me28S-A982b
FBgn0262114	RanBPM	FBgn0034402	CG15084	FBgn0034304	CG5742	FBgn0025525	bab2	FBgn0037025	Spc105R	FBgn0029148	NHP2	FBgn0260027	CG42495	FBgn0002968	Nrg	FBgn0029838	CG4666	FBgn0037750	Whamy	FBgn0038942	CG13862	FBgn0042104	CG18747	FBgn0037607	CG8036	FBgn0039641	CG14511	FBgn0052695	CG32695					FBgn0038509	CG14332	FBgn0082978	snoRNA:Psi28S-3091b	FBgn0038419	CG14879	FBgn0037923	CG6813	FBgn0001256	ImpL1	FBgn0038567	CG14316	FBgn0262738	norpA	FBgn0033377	Pmm45A
FBgn0033526	Caf1-105	FBgn0014269	prod	FBgn0022238	lolal	FBgn0035186	CG13912	FBgn0037026	CG3634	FBgn0036462	mRpL39	FBgn0036814	CG14073	FBgn0026411	Lim1	FBgn0029863	CG3823	FBgn0263097	Glut4EF	FBgn0085317	CG34288	FBgn0042102	CG18745	FBgn0037608	mRpL19	FBgn0039650	Mesh1	FBgn0030156	CG15247					FBgn0038523	CG7587	FBgn0082979	snoRNA:Psi28S-3091a	FBgn0027562	CG10345	FBgn0025821	I-t	FBgn0036353	CG10171	FBgn0038589	CG18598	FBgn0029720	CG3009	FBgn0033382	Hydr1
FBgn0263102	psq	FBgn0034410	Topors	FBgn0034307	CG10914	FBgn0063667	CG32335	FBgn0028402	Sin	FBgn0027088	Aats-gly	FBgn0036819	dysb	FBgn0030065	CG12075	FBgn0029864	CG15894	FBgn0041105	nerfin-2	FBgn0038980	oa2	FBgn0042105	CG18748	FBgn0037671	VhaM8.9	FBgn0051427	CG31427	FBgn0030157	CG1468					FBgn0003375	Sgs5	FBgn0082954	snoRNA:Psi28S-3571	FBgn0051217	modSP	FBgn0037949	CG17360	FBgn0052121	CG32121	FBgn0004652	fru	FBgn0028325	l(1)G0334	FBgn0033387	CG8008
FBgn0024956	Mat1	FBgn0027535	botv	FBgn0034310	Nup75	FBgn0004378	Klp61F	FBgn0037061	CG12975	FBgn0014002	Pdi	FBgn0086661	snoRNA:Psi28S-2566	FBgn0030077	CG15365	FBgn0259242	CG42340	FBgn0262419	mir-277	FBgn0039024	CG4721	FBgn0042103	CG18746	FBgn0037676	CG8861	FBgn0039674	CG1907	FBgn0026415	Idgf4					FBgn0040565	CG7606	FBgn0086662	snoRNA:Psi28S-3186	FBgn0043069	MESK4	FBgn0025802	Sbf	FBgn0036382	CG13737	FBgn0038629	CG14304	FBgn0029771	CG12730	FBgn0040775	CG12158
FBgn0027499	wde	FBgn0000578	ena	FBgn0000658	fj	FBgn0052318	CG32318	FBgn0259785	pzg	FBgn0036489	CG7011	FBgn0016797	fz2	FBgn0030107	CG15370	FBgn0029881	pigs	FBgn0037796	CG12814	FBgn0051052		FBgn0037517	CG10086	FBgn0037697	CG9363	FBgn0039697	CG7834	FBgn0040941	CG15308					FBgn0038533	CG7523	FBgn0082988	snoRNA:Psi28S-2442b	FBgn0051274	CG31274	FBgn0037956	CG6959	FBgn0250848	26-29-p	FBgn0038632	CG14301	FBgn0029799	CG15772	FBgn0260474	CG30002
FBgn0033549	mms4	FBgn0034425	CG11906	FBgn0003022	Ote	FBgn0035210	msd5	FBgn0052441	CG32441	FBgn0036500	CG7275	FBgn0017578	Max	FBgn0261260	mgl	FBgn0062413	Ctr1A	FBgn0004575	Syn	FBgn0262841		FBgn0042101	CG18744	FBgn0037698	CG16779	FBgn0039698	CG7789	FBgn0011770	Gip					FBgn0038535	alt	FBgn0044823	Spec2	FBgn0038465	Irc	FBgn0037964	CG14731	FBgn0052141	CG32141	FBgn0051230	CG31230	FBgn0029801	CG15771	FBgn0005614	trpl
FBgn0033550	CG12341	FBgn0013954	FK506-bp2	FBgn0053198	pen-2	FBgn0035213	CG2199	FBgn0037108	CG11306	FBgn0036501	CG7272	FBgn0003089	pip	FBgn0028327	l(1)G0320	FBgn0027106	inx7	FBgn0259938	cwo	FBgn0039042	CG13837	FBgn0085413	CG34384	FBgn0014023	Rlc1	FBgn0039704	neo	FBgn0083167	Neb-cGP					FBgn0038542	TyrR	FBgn0037350	CG2911	FBgn0262871	lute	FBgn0051211	CG31211	FBgn0036415	CG7768	FBgn0038654	CG14298	FBgn0029837	Tsp5D	FBgn0033442	CG1690
FBgn0086898	dgo	FBgn0034430	mip40	FBgn0050120	CG30120	FBgn0029514	CG9166	FBgn0037120	CG11247	FBgn0036510	CG7427	FBgn0036892	Lon	FBgn0052702	CG32702	FBgn0026144	CBP	FBgn0262717	Skeletor	FBgn0039051	CG17109	FBgn0014930	CG2846	FBgn0037709	CG8199	FBgn0039718	CG15517	FBgn0030239	CG17333					FBgn0038547	CG17803	FBgn0037363	CG1347	FBgn0038504	Sur-8	FBgn0260742	CG12213	FBgn0087007	bbg	FBgn0261262	CG42613	FBgn0029843	Nep1	FBgn0033446	CG1648
FBgn0029134	Prosbeta5	FBgn0034432	CG7461	FBgn0261119	Prp19	FBgn0004635	rho	FBgn0037121	Rpb8	FBgn0036515	CG12304	FBgn0036899	tey	FBgn0028341	l(1)G0232	FBgn0029950	CG9657	FBgn0004841	Takr86C	FBgn0039053	CG6738	FBgn0037536	CG2698	FBgn0037723	SpdS	FBgn0003358	Jon99Ci	FBgn0003965	v					FBgn0038577	CG12321	FBgn0037370	CG1236	FBgn0085309	CG34280	FBgn0037972	CG10005	FBgn0036426	CG9592	FBgn0038665	CG12269	FBgn0029846		FBgn0040093	lectin-46Ca
FBgn0033554	Lsm10	FBgn0040273	Spt5	FBgn0050122	CG30122	FBgn0028577	pUf68	FBgn0037153	olf413	FBgn0036519	CG7650	FBgn0262393	mir-33	FBgn0030162	CG1986	FBgn0004198	ct	FBgn0037832	Desi	FBgn0039069	CG6763	FBgn0037546	CG7918	FBgn0012344	Dh44	FBgn0039726	eIF2B-alpha	FBgn0030251	CG2145					FBgn0038638	CG7702	FBgn0262603	sec8	FBgn0262005	CG42823	FBgn0037999	CG4860	FBgn0262891	CG43246	FBgn0051475	CG31475	FBgn0086558	Ubi-p5E	FBgn0054033	CG34033
FBgn0010356	Taf5	FBgn0023211	Elongin-C	FBgn0259202	CG42306	FBgn0035235	CG7879	FBgn0028500	Rich	FBgn0010105	comm	FBgn0020389	Papss	FBgn0086045	snoRNA:Me18S-A627	FBgn0029962	CG1402	FBgn0037847	SelR	FBgn0039081	Irk2	FBgn0243512	puc	FBgn0003886	alphaTub85E	FBgn0260468	CG7950	FBgn0052667	CG32667					FBgn0038651	CG14299	FBgn0027608	CG2082	FBgn0261932	CG42798	FBgn0038002	CG12256	FBgn0262581	CG43121	FBgn0038693	unc79	FBgn0029868	CG3446	FBgn0033461	CG12923
FBgn0033566	CG18004	FBgn0003887	betaTub56D	FBgn0023214	edl	FBgn0013753	Bgb	FBgn0011771	Hem	FBgn0261722	fwe	FBgn0262518	Rab8	FBgn0030186	CG2962	FBgn0004657	mys	FBgn0083950	CG34114	FBgn0043005	prt	FBgn0037563	CG11672	FBgn0002868	MtnA	FBgn0039765	mRpS18C	FBgn0030338	CG15741					FBgn0038716	CG7342	FBgn0028690	Rpn5	FBgn0000564	Eh	FBgn0010039	GstD3	FBgn0036436	CG4914	FBgn0262839	CG43203	FBgn0261955	kdn	FBgn0050008	CG30008
FBgn0050020	CG30020	FBgn0034451	CG11242	FBgn0034380	CG15087	FBgn0035249	CG17249	FBgn0037182	ArfGAP3	FBgn0000115	Arf72A	FBgn0036921	RhoGDI	FBgn0085437	CG34408	FBgn0029995	CG2256	FBgn0040259	Ugt86Da	FBgn0039107	CG10300	FBgn0261108	Atg13	FBgn0037766	Teh1	FBgn0039768	CG15533	FBgn0030362	regucalcin					FBgn0038719	CG16727	FBgn0037378	CG2046	FBgn0004554	Edg91	FBgn0010041	GstD5	FBgn0036437	CG5048	FBgn0038705	CG11626	FBgn0085446	CG34417	FBgn0033468	CG1418
FBgn0033569	CG12942	FBgn0026378	Rep	FBgn0034402	CG15084	FBgn0035253	CG7971	FBgn0044324	Chro	FBgn0036557	mRpS31	FBgn0036926	CG7646	FBgn0030187	Ipod	FBgn0030001	cyr	FBgn0040252	Ugt86Dh	FBgn0039118	CG10208	FBgn0020249	stck	FBgn0037801	CG3999	FBgn0039769	CG15534	FBgn0030369	Cyp318a1					FBgn0038784	CG4362	FBgn0037396	CG11459	FBgn0038530	AttD	FBgn0038054	CG5509	FBgn0036440	CG17177	FBgn0038709	CG15025	FBgn0029888	CG3192	FBgn0040773	CoVIIc
FBgn0033581	CG12391	FBgn0261456	hpo	FBgn0014269	prod	FBgn0035254	CG7974	FBgn0037206	CG12768	FBgn0260635	th	FBgn0261574	kug	FBgn0028331	l(1)G0289	FBgn0030011	Gbeta5	FBgn0037908	dpr5	FBgn0051140	CG31140	FBgn0051454	CG31454	FBgn0024957	Irp-1B	FBgn0039777	Jon99Fii	FBgn0052656	Muc11A					FBgn0038809	CG16953	FBgn0046876	Obp83ef	FBgn0038533	CG7523	FBgn0038080	CG12279	FBgn0036441	CG13476	FBgn0038714	Cpr92A	FBgn0028336	l(1)G0255	FBgn0028560	sut4
FBgn0037084	Syx6	FBgn0015949	hrg	FBgn0041702	CG15107	FBgn0082944	snoRNA:Me28S-A2634c	FBgn0037207	Mes2	FBgn0017453		FBgn0052227	gogo	FBgn0263072	CG43347	FBgn0030040	CG15347	FBgn0263316	Mrp4	FBgn0051451	CR31451	FBgn0261929	CG42796	FBgn0037815	Rrp46	FBgn0039778	Jon99Fi	FBgn0030394	Cpr11A					FBgn0046689	Takl1	FBgn0037442	CG10277	FBgn0038547	CG17803	FBgn0038090	CG10909	FBgn0085274	CG34245	FBgn0083974	CG34138	FBgn0029930	CG12541	FBgn0003071	Pfk
FBgn0033607	CG9062	FBgn0034486	CG13869	FBgn0027535	botv	FBgn0035264	Oseg4	FBgn0024733	RpL10	FBgn0011016	SsRbeta	FBgn0036979	CG13247	FBgn0052677	X11Lbeta	FBgn0002968	Nrg	FBgn0037917	wkd	FBgn0013343	Syx1A	FBgn0083971	CG34135	FBgn0051278	CG31278	FBgn0039789	CG9717	FBgn0030398	Cpr11B					FBgn0028396	TotA	FBgn0037443	CG1021	FBgn0026250	eIF-1A	FBgn0038102	CG14383	FBgn0036463	Reck	FBgn0024963	GluClalpha	FBgn0029937	CG8300	FBgn0033490	CG12917
FBgn0033609	fbl6	FBgn0025720	Ate1	FBgn0000578	ena	FBgn0035267	CG13921	FBgn0053217	CG33217	FBgn0036579	CG5027	FBgn0083120	Uhg8	FBgn0052676	CG32676	FBgn0030052	CG12065	FBgn0259227	CG42327	FBgn0000036	nAcRalpha-96Aa	FBgn0037646	CAHbeta	FBgn0004841	Takr86C	FBgn0039827	CG1544	FBgn0030451	CG15717					FBgn0046763	CG17278	FBgn0037472	CG10098	FBgn0004618	gl	FBgn0038147	CCHa2	FBgn0047338	CG32148	FBgn0038735	CG4662	FBgn0029948	CheA7a	FBgn0033495	CG12214
FBgn0015582	dare	FBgn0034491	CG11055	FBgn0034422	CG7137	FBgn0035271	CG2021	FBgn0039977	CG17454	FBgn0040796	CG13064	FBgn0036999	isoQC	FBgn0030252		FBgn0030077	CG15365	FBgn0042110	CG18765	FBgn0000039	nAcRalpha-96Ab	FBgn0037671	VhaM8.9	FBgn0037842	CG6567	FBgn0039835	mRpL32	FBgn0030482	CG1673					FBgn0011672	Mvl	FBgn0086372	lap	FBgn0262846	CG43210	FBgn0038149	CG9796	FBgn0036482	CG13457	FBgn0038737	CG11447	FBgn0040922	CG15036	FBgn0005619	Hdc
FBgn0033616	CG7745	FBgn0005655	mus209	FBgn0013954	FK506-bp2	FBgn0024510	dlt	FBgn0040020	MED21	FBgn0025558	CG4101	FBgn0037008	mTerf3	FBgn0021742	C901	FBgn0052702	CG32702	FBgn0037941	CG12594	FBgn0039208	Esyt2	FBgn0037676	CG8861	FBgn0022359	Sodh-2	FBgn0039836	CG1750	FBgn0030492	CG15754					FBgn0016700	Rab1	FBgn0037515	Sp7	FBgn0262823	CG43194	FBgn0261846	CG42778	FBgn0036488	CG6878	FBgn0038744	CG4733	FBgn0262979	CG43287	FBgn0033498	CG12209
FBgn0001276	ix	FBgn0034496	CG9143	FBgn0034430	mip40	FBgn0011573	Cdc37	FBgn0058354	CR40354	FBgn0040512	zetaCOP	FBgn0037009	CG5104	FBgn0030257	CG11160	FBgn0030161	CG15249	FBgn0037993	dpr15	FBgn0004188	snRNA:U6:96Aa	FBgn0262993	CR43301	FBgn0083950	CG34114	FBgn0039838	CG3669	FBgn0030511	CG11158					FBgn0261841	pre-mod(mdg4)-AD	FBgn0037533	CD98hc	FBgn0038651	CG14299	FBgn0010258	Rbp4	FBgn0036491	Best4	FBgn0038749	Xport	FBgn0029971	CG18624	FBgn0033499	CG12914
FBgn0024188	san	FBgn0034498	CG16868	FBgn0034442	CG11257	FBgn0067864	Patj	FBgn0015331	abs	FBgn0004108	Nrt	FBgn0001323	knrl	FBgn0015245	Hsp60	FBgn0030162	CG1986	FBgn0038017	CG4115	FBgn0039209	CG13624	FBgn0037697	CG9363	FBgn0086472	RpS25	FBgn0039840	CG11340	FBgn0030518	CG11134					FBgn0083984	CG34148	FBgn0037537	CG2767	FBgn0038682	CG5835	FBgn0038165	Task6	FBgn0036496	CG7804	FBgn0262869	mun	FBgn0030013	GIIIspla2	FBgn0250822	CG34222
FBgn0033635	CG7777	FBgn0034504	CG8929	FBgn0040273	Spt5	FBgn0261562	CG42676	FBgn0037240	Cont	FBgn0025582	Int6	FBgn0037017	CG4074	FBgn0010391	Gtp-bp	FBgn0263216	CG43386	FBgn0038042	Scgbeta	FBgn0015591	Ast	FBgn0000244	by	FBgn0020910	RpL3	FBgn0039849	CG11334	FBgn0030539	CG1368					FBgn0038943	CG5391	FBgn0037538	CG3223	FBgn0260003	Dys	FBgn0038179	CG9312	FBgn0036497	ran-like	FBgn0038819	Cpr92F	FBgn0017566	ND75	FBgn0262791	CG43172
FBgn0000581	E(Pc)	FBgn0034514	CG13427	FBgn0023211	Elongin-C	FBgn0004636	R	FBgn0037241	CG14646	FBgn0036696	CG14057	FBgn0037061	CG12975	FBgn0052668	CG32668	FBgn0030167	CG15252	FBgn0250910	Octbeta3R	FBgn0039226	Ude	FBgn0037723	SpdS	FBgn0086055	snoRNA:Me18S-C1096	FBgn0039854	CG1635	FBgn0030540	CG11581					FBgn0038966	pinta	FBgn0037539	CG10435	FBgn0038720	CG6231	FBgn0038180	Cht5	FBgn0036498	CG13455	FBgn0038840	CG5621	FBgn0015519	nAcRalpha-7E	FBgn0262790	CG43171
FBgn0033638	CG9005	FBgn0015907	bl	FBgn0003887	betaTub56D	FBgn0035294	Mfap1	FBgn0086605	CG9853	FBgn0015550	tap	FBgn0037083	CG5656	FBgn0083980	CG34144	FBgn0052694	CG32694	FBgn0038084	beat-Vc	FBgn0039232	CG13636	FBgn0037724	Fst	FBgn0065064	snoRNA:Psi28S-291	FBgn0000150	awd	FBgn0052603	CG32603					FBgn0028688	Rpn7	FBgn0001255	ImpE3	FBgn0038747	RhoGAP92B	FBgn0000454	Dip-B	FBgn0036499	CG7276	FBgn0038871	CG3337	FBgn0030053	CG12081	FBgn0250840	CG12907
FBgn0062449	CG13197	FBgn0034528	CG11180	FBgn0034447	CG7744	FBgn0002872	mu2	FBgn0037249	eIF3-S10	FBgn0053051	CG33051	FBgn0037092	M6	FBgn0262740	CG11727	FBgn0263132	Cht6	FBgn0051345	CG31345	FBgn0039239	CG13641	FBgn0051352	Unc-115a	FBgn0086057	snoRNA:Me28S-G2017	FBgn0039872	salt	FBgn0030543	CG11585					FBgn0024958	Irp-1A	FBgn0037553	CG18249	FBgn0038752	CG4462	FBgn0259730	tal-1A	FBgn0036502	CG7841	FBgn0038874	ETHR	FBgn0030066	CG1885	FBgn0263271	CG43397
FBgn0033653	CG13192	FBgn0034537	DMAP1	FBgn0034452	Oseg6	FBgn0035295	Cnb	FBgn0037252	CG14650	FBgn0053052	CG33052	FBgn0037105	S1P	FBgn0004370	Ptp10D	FBgn0030186	CG2962	FBgn0038087	beat-Va	FBgn0013949	Ela	FBgn0037747	CG8481	FBgn0037883	CG14701	FBgn0003065	CG2150	FBgn0030558	CG1461					FBgn0039015	Takl2	FBgn0037560	CR18228	FBgn0002869	MtnB	FBgn0008646	E5	FBgn0001099	gdl	FBgn0038880	SIFR	FBgn0261549	rdgA	FBgn0033512	CG12902
FBgn0033656	S2P	FBgn0050295	Ipk1	FBgn0026378	Rep	FBgn0035315	CG8960	FBgn0037270	CG9769	FBgn0052174	CG32174	FBgn0037108	CG11306	FBgn0002577	m	FBgn0030187	Ipod	FBgn0038092	beat-Vb	FBgn0260229	CG42503	FBgn0037750	Whamy	FBgn0037890	CG17734	FBgn0039877	CG2118	FBgn0030593	CG9512					FBgn0262975	cnc	FBgn0062412	Ctr1B	FBgn0038804	CG10877	FBgn0038188	Art9	FBgn0262689	CR43159	FBgn0051174	CG31174	FBgn0052709		FBgn0261686	CG42733
FBgn0013756	Mtor	FBgn0008636	hbn	FBgn0261456	hpo	FBgn0016794	dos	FBgn0260794	ctrip	FBgn0036725	CG18265	FBgn0053291		FBgn0262684	CG43154	FBgn0259170	alpha-Man-I	FBgn0038095	Cyp304a1	FBgn0051103	CG31103	FBgn0037781	Fancl	FBgn0037892	mRpL40	FBgn0025837	CG17636	FBgn0053178	CG33178					FBgn0039092	CG16723	FBgn0037612	CG8112	FBgn0046689	Takl1	FBgn0038189	Art6	FBgn0260777	CG42571	FBgn0038912	CG6656	FBgn0040931	CG9034	FBgn0263270	CG43396
FBgn0260932	cuff	FBgn0001133	grau	FBgn0004364	18w	FBgn0028504	CG12182	FBgn0026417	Hus1-like	FBgn0036745	CG7484	FBgn0037117	CG11248	FBgn0001083	fw	FBgn0000711	flw	FBgn0260793	2mit	FBgn0051098	CG31098	FBgn0037789	CG6208	FBgn0037895	CG6723	FBgn0259722	CG42376	FBgn0030612	CG5599					FBgn0028691	Rpn9	FBgn0037618	CG11762	FBgn0038838	TotB	FBgn0262808	CG43179	FBgn0260776	CG42570	FBgn0038922	CG6439	FBgn0030102	CG12119	FBgn0033558	CG12344
FBgn0026573	CG8290	FBgn0034572	CG9346	FBgn0005655	mus209	FBgn0035357	MEP-1	FBgn0037282	CG14657	FBgn0036752	Adgf-A	FBgn0037120	CG11247	FBgn0030360	CG1806	FBgn0085443	spri	FBgn0038130	CG8630	FBgn0051097	CG31097	FBgn0004575	Syn	FBgn0037898	CG18643	FBgn0262811	CG43182	FBgn0030615	Cyp4s3					FBgn0028684	Tbp-1	FBgn0037623	CG9801	FBgn0044809	TotZ	FBgn0003862	trx	FBgn0005536	Mbs	FBgn0038925	Cchl	FBgn0019929	Ser7	FBgn0050016	CG30016
FBgn0053145	CG33145	FBgn0003391	shg	FBgn0034503	MED8	FBgn0250911	CG42245	FBgn0010313	corto	FBgn0052187	CG32187	FBgn0037153	olf413	FBgn0030375	CG11356	FBgn0263072	CG43347	FBgn0038140	CG8784	FBgn0039319	CG13659	FBgn0259938	cwo	FBgn0037908	dpr5	FBgn0011822	pcl	FBgn0014455	Ahcy13					FBgn0039114	Lsd-1	FBgn0037635	CG9837	FBgn0038842	CG5630	FBgn0038219	CG14839	FBgn0036577	CG13073	FBgn0019957	ND42	FBgn0030156	CG15247	FBgn0033572	CG12943
FBgn0011704	RnrS	FBgn0002736	mago	FBgn0034504	CG8929	FBgn0035370	CG1240	FBgn0037309	CR31541	FBgn0036765	CG7408	FBgn0011771	Hem	FBgn0259240	Ten-a	FBgn0030234	CG15211	FBgn0051337	CG31337	FBgn0039326	CG10562	FBgn0004841	Takr86C	FBgn0053512	dpr4	FBgn0023537	CG17896	FBgn0262409	mir-304					FBgn0053111	CG33111	FBgn0037647	RagA	FBgn0025865	Cortactin	FBgn0038221	CG3259	FBgn0036583	CG13055	FBgn0038929	CG13408	FBgn0030158	CG9686	FBgn0033574	Spn47C
FBgn0033673	CG8298	FBgn0026582	CG9418	FBgn0034514	CG13427	FBgn0035371	CG9977	FBgn0003275	RpII18	FBgn0086081	snoRNA:Me28S-A30	FBgn0004449	Ten-m	FBgn0030389	CG15927	FBgn0030244	CG2157	FBgn0038161	CG9269	FBgn0039354	Lgr3	FBgn0051272	CG31272	FBgn0037912	sea	FBgn0260855	Sec22	FBgn0030678	CG11679					FBgn0047114	CG31142	FBgn0037648	CG11975	FBgn0038897	CG5849	FBgn0024321	NK7.1	FBgn0036584	CG13054	FBgn0038956	CG5379	FBgn0030160	CG9691	FBgn0033610	CG18335
FBgn0259985	Mppe	FBgn0034598	CG4266	FBgn0034523	Nnf1a	FBgn0035375	pgant6	FBgn0037336	CG2519	FBgn0036774	mRpS26	FBgn0037165	CG11437	FBgn0052654	Sec16	FBgn0003965	v	FBgn0038165	Task6	FBgn0039380	CG5890	FBgn0037832	Desi	FBgn0037926	Elp1	FBgn0040340	TRAM	FBgn0014391	sun					FBgn0015282	Pros26.4	FBgn0026380	Prosbeta3	FBgn0003867	tsl	FBgn0051320	CG31320	FBgn0053257	CG33257	FBgn0038961	CG13850	FBgn0030163	CG1791	FBgn0040763	CG18336
FBgn0260012	pds5	FBgn0261850	Xpd	FBgn0015907	bl	FBgn0035376		FBgn0037347	CG1427	FBgn0015946	grim	FBgn0053169	CG33169	FBgn0030452	MFS10	FBgn0052668	CG32668	FBgn0038197	foxo	FBgn0051323	CG31323	FBgn0037853	CG14696	FBgn0037955	CG6950	FBgn0040349	CG3699	FBgn0001092	Gapdh2					FBgn0039130	CG5854	FBgn0010222	Nmdmc	FBgn0262331	mir-999	FBgn0086901	cv-c	FBgn0085278	CG34249	FBgn0038977	CG5376	FBgn0030164	CG1889	FBgn0260499	qvr
FBgn0033677	CG8321	FBgn0034606	ASPP	FBgn0034534	maf-S	FBgn0035378		FBgn0037352		FBgn0036786	skl	FBgn0010348	Arf79F	FBgn0052645	CG32645	FBgn0083980	CG34144	FBgn0038202	CG12402	FBgn0051086	CG31086	FBgn0083950	CG34114	FBgn0037973	CG18547	FBgn0014903	CG14630	FBgn0030737	CG9914					FBgn0039135	CG13603	FBgn0014018	Rel	FBgn0013948		FBgn0085417	CG34388	FBgn0261799	dsx-c73A	FBgn0053110	CG33110	FBgn0028342	l(1)G0230	FBgn0082993	snoRNA:Psi28S-1936
FBgn0010339	128up	FBgn0050390	Sgf29	FBgn0034537	DMAP1	FBgn0035393	CG16753	FBgn0027951	MTA1-like	FBgn0036787	CG4306	FBgn0037206	CG12768	FBgn0030459	CG12723	FBgn0030300	Sk1	FBgn0038205	Kif19A	FBgn0085320	CG34291	FBgn0040256	Ugt86Dd	FBgn0037976	Tk	FBgn0040367	CG11382	FBgn0052571	TwdlX					FBgn0015795	Rab7	FBgn0260935	ird1	FBgn0263117	CG34377	FBgn0051313	CG31313	FBgn0036677	CG13023	FBgn0039007	Ccap	FBgn0263220	Hk	FBgn0050035	Tret1-1
FBgn0024732	Drep-1	FBgn0034617	CG9754	FBgn0034540	Lrt	FBgn0052486	CG32486	FBgn0004878	cas	FBgn0260027	CG42495	FBgn0024733	RpL10	FBgn0004456	mew	FBgn0002723	Met	FBgn0262127	kibra	FBgn0263289	scrib	FBgn0040257	Ugt86Dc	FBgn0037993	dpr15	FBgn0027794	CG14786	FBgn0052574	Twdlalpha					FBgn0001230	Hsp68	FBgn0037677	CG12951	FBgn0038965	mats	FBgn0051314	Neu3	FBgn0036681	Obp73a	FBgn0039008	CG6972	FBgn0083167	Neb-cGP	FBgn0033644	Tret1-2
FBgn0027495	CG8378	FBgn0050394	CG30394	FBgn0050295	Ipk1	FBgn0003938	snRNA:U5:63BC	FBgn0037382	Hpr1	FBgn0036819	dysb	FBgn0000258		FBgn0085388	IP3K2	FBgn0004370	Ptp10D	FBgn0038267	CG17304	FBgn0039441	TwdlN	FBgn0040259	Ugt86Da	FBgn0037996	CG4830	FBgn0026089	CG14817	FBgn0083011	snoRNA:Psi28S-1135b					FBgn0039165	CG6204	FBgn0262993	CR43301	FBgn0038981	CG5346	FBgn0085433	CG34404	FBgn0260943	Rbp6	FBgn0040587	CG17618	FBgn0003360	sesB	FBgn0260007	CG42493
FBgn0033685	CG13178	FBgn0020306	dom	FBgn0008636	hbn	FBgn0035405	pfk	FBgn0003261	Rm62	FBgn0086661	snoRNA:Psi28S-2566	FBgn0053217	CG33217	FBgn0030484	CG1681	FBgn0030340	CG15740	FBgn0038282	dpr9	FBgn0250908	beat-VII	FBgn0040253	Ugt86Dg	FBgn0038007	Cyp313a3	FBgn0013432	bcn92	FBgn0030824	CG5070					FBgn0019952	Orct	FBgn0053936		FBgn0053093	CG33093	FBgn0263040	CG43335	FBgn0036712	brv2	FBgn0051281	Tpl94D	FBgn0030257	CG11160	FBgn0085259	CG34230
FBgn0033686	Hen1	FBgn0034631	CG10496	FBgn0034572	CG9346	FBgn0052281	CG32281	FBgn0261789	SmD2	FBgn0036825	RpL26	FBgn0010215	alpha-Cat	FBgn0030508	CG15760	FBgn0030345	CG1847	FBgn0261859	CG42788	FBgn0023179	amon	FBgn0040255	Ugt86De	FBgn0042206	GstD10	FBgn0023529	CG2918	FBgn0030832	CG10597					FBgn0004885	tok	FBgn0014380	RhoL	FBgn0038983	CG5326	FBgn0263041	CG43336	FBgn0036716	CG13728	FBgn0039054	CG13830	FBgn0030258	CG1552	FBgn0260436	CG42531
FBgn0027504	CG8878	FBgn0000326	clt	FBgn0003391	shg	FBgn0027616	YT521-B	FBgn0037439	CG10286	FBgn0036847	CG11577	FBgn0039977	CG17454	FBgn0261244	inaE	FBgn0030358	CG10362	FBgn0262315	mir-2493	FBgn0039453	CG6403	FBgn0026315	Ugt35a	FBgn0010040	GstD4	FBgn0040389	mRpL14	FBgn0030882	GS					FBgn0039223	CG5805	FBgn0260722	CR42549	FBgn0020278	loco	FBgn0038365	CG9593	FBgn0036732	Oatp74D	FBgn0039077	CG17380	FBgn0030270	CG15199	FBgn0260959	MCPH1
FBgn0023167	SmD3	FBgn0034646	Rae1	FBgn0015721	king-tubby	FBgn0035443	CG12010	FBgn0037446	Zif	FBgn0016797	fz2	FBgn0058045	CG40045	FBgn0030569	CG9411	FBgn0030390	CG15731	FBgn0038295	Gyc88E	FBgn0039454	CG14247	FBgn0040250	Ugt86Dj	FBgn0010042	GstD6	FBgn0003714	tko	FBgn0021765	scu					FBgn0262722	CG43166	FBgn0037710	CG9393	FBgn0261572	CG42686	FBgn0263023	CG43318	FBgn0000567	Eip74EF	FBgn0039084	CG10175	FBgn0026268	antdh	FBgn0050039	CG30039
FBgn0010621	Cct5	FBgn0259725	CG42379	FBgn0020312	CG4050	FBgn0014388	sty	FBgn0262801	twr	FBgn0260857	Bet1	FBgn0044510	mRpS5	FBgn0030570	CG12540	FBgn0011837	Tis11	FBgn0259823	CG42404	FBgn0015541	sda	FBgn0040252	Ugt86Dh	FBgn0010044	GstD8	FBgn0024996	eIF2B-beta	FBgn0030914	CG6106					FBgn0039238	CG7016	FBgn0037721	CG9427	FBgn0039006	Cyp6d4	FBgn0051088	CG31088	FBgn0052183	Ccn	FBgn0051145	CG31145	FBgn0261569	CG42683	FBgn0028407	Drep-3
FBgn0000426	SmF	FBgn0034654	CG10306	FBgn0002736	mago	FBgn0262260	mir-2282	FBgn0051481	pb	FBgn0259720	CG42374	FBgn0085810	CR41597	FBgn0030575	CG5321	FBgn0053963	CR33963	FBgn0038312	CG4334	FBgn0039464	CG6330	FBgn0037870	CG18577	FBgn0038042	Scgbeta	FBgn0024997	CG2681	FBgn0030966	CG7280					FBgn0039241	CG11089	FBgn0037727	CG8358	FBgn0039030	CG6660	FBgn0003513	ss	FBgn0052181	CG32181	FBgn0085384	CG34355	FBgn0083980	CG34144	FBgn0033680	CG13186
FBgn0033698	CG8858	FBgn0003687	Tbp	FBgn0034590	Magi	FBgn0035464	CG12006	FBgn0000071	Ama	FBgn0036856	CG9666	FBgn0028993	scro	FBgn0024753		FBgn0052645	CG32645	FBgn0004117	Tm2	FBgn0039467	CG14253	FBgn0037883	CG14701	FBgn0038056	CG5961	FBgn0250874	ttm50	FBgn0030968	CG7322					FBgn0085378	CG34349	FBgn0086663	snoRNA:Psi18S-1275	FBgn0039061	Ir	FBgn0051217	modSP	FBgn0000568	Eip75B	FBgn0039196	CG17781	FBgn0030292	CG11752	FBgn0026176	skpB
FBgn0033712	CG13163	FBgn0050290	Ppcdc	FBgn0034598	CG4266	FBgn0013751	Awh	FBgn0000439	Dfd	FBgn0003089	pip	FBgn0040022	Set1	FBgn0030587	CG9522	FBgn0030459	CG12723	FBgn0262483	Rbp	FBgn0039509	bigmax	FBgn0037890	CG17734	FBgn0250910	Octbeta3R	FBgn0040384	CG32795	FBgn0030980	CG7406					FBgn0039269	veli	FBgn0037758	CG9467	FBgn0039069	CG6763	FBgn0043069	MESK4	FBgn0052192	CG32192	FBgn0086610	CG33342	FBgn0001624	dlg1	FBgn0033692	wash
FBgn0033713	CG8841	FBgn0050404	Tango11	FBgn0034606	ASPP	FBgn0004880	scrt	FBgn0003339	Scr	FBgn0036899	tey	FBgn0040020	MED21	FBgn0030591	CG9517	FBgn0004456	mew	FBgn0038341	CG14869	FBgn0085323	CG34294	FBgn0037895	CG6723	FBgn0028374	hug	FBgn0040352	CG14416	FBgn0031010	CG8028					FBgn0004897	fd96Ca	FBgn0051410	Npc2e	FBgn0039084	CG10175	FBgn0051274	CG31274	FBgn0259739	CG42393	FBgn0004118	nAcRbeta-96A	FBgn0045502	Gr10a	FBgn0025454	Cyp6g1
FBgn0033715	CG8490	FBgn0034657	LBR	FBgn0034611	MFS16	FBgn0035482	CG14985	FBgn0260642	Antp	FBgn0040786	CG14104	FBgn0063670	CG40228	FBgn0030592	CG9514	FBgn0030484	CG1681	FBgn0038366	CG4576	FBgn0262286	mir-1001	FBgn0037906	PGRP-LB	FBgn0005671	Vha55	FBgn0040353	CG14417	FBgn0085360	CG34331					FBgn0039299	CG11854	FBgn0037788	CG3940	FBgn0039091	CG10182	FBgn0020493	Dad	FBgn0262898	CG43253	FBgn0003429	slo	FBgn0001145	Gs2	FBgn0033696	Cyp6g2
FBgn0033718	ana3	FBgn0002715	mei-S332	FBgn0034614	CG9752	FBgn0001257	ImpL2	FBgn0262897	CG43252	FBgn0020389	Papss	FBgn0260987	vtd	FBgn0030598	CG9503	FBgn0052635	Neto	FBgn0051291	CG31291	FBgn0051058	CG31058	FBgn0037908	dpr5	FBgn0038074	CG6188	FBgn0040354	CG14418	FBgn0022770	Peritrophin-A					FBgn0039312	CG10514	FBgn0037801	CG3999	FBgn0053337	CG33337	FBgn0038492	Mur89F	FBgn0052194	CR32194	FBgn0039217	CG13627	FBgn0030304	Cyp4g15	FBgn0033701	CG13171
FBgn0033737	Nup54	FBgn0034703	CG3045	FBgn0261554	CG42672	FBgn0011692	pav	FBgn0037469	Dpck	FBgn0036916	Mtr3	FBgn0028697	RpL15	FBgn0030600	hiw	FBgn0030491	CG15753	FBgn0085304	CG34275	FBgn0085382	CG34353	FBgn0263316	Mrp4	FBgn0038084	beat-Vc	FBgn0029639	CG14419	FBgn0025814	Mgstl					FBgn0039313	CG11892	FBgn0037819	CG14688	FBgn0039108	CG10232	FBgn0261046	Dscam3	FBgn0085282	CG34253	FBgn0083986	CG34150	FBgn0030309	CG1572	FBgn0033705	CG13168
FBgn0050051	CG30051	FBgn0034707	MED16	FBgn0034617	CG9754	FBgn0041171	ago	FBgn0261238	Alh	FBgn0036918	CG7770	FBgn0037232	CG9791	FBgn0030617	CG9095	FBgn0030508	CG15760	FBgn0038420	CG10311	FBgn0003890	betaTub97EF	FBgn0037934	CG6830	FBgn0038098	CG7381	FBgn0025643	CG3588	FBgn0031148	Cbs					FBgn0051102	CG31102	FBgn0020385	pug	FBgn0039109	CG10365	FBgn0038533	CG7523	FBgn0262100	CG42853	FBgn0040601	CG13643	FBgn0030311	CG11699	FBgn0033706	Vha36-2
FBgn0033740	dgt5	FBgn0034708	Vps35	FBgn0050394	CG30394	FBgn0035520	CG11586	FBgn0037478	CG2656	FBgn0036919	Grasp65	FBgn0037240	Cont	FBgn0030654	CG15643	FBgn0030510	CG12177	FBgn0038422	CG14880	FBgn0039584	beat-VI	FBgn0037935	CG6834	FBgn0038105	yellow-f2	FBgn0025644	CG14424	FBgn0031190	CG12576					FBgn0051370	CG31370	FBgn0037835	CG14687	FBgn0065098	RNaseMRP:RNA	FBgn0051360	CG31360	FBgn0020300	gk	FBgn0039264	CG11786	FBgn0030317	CG1561	FBgn0261611	CG42700
FBgn0045063	fdl	FBgn0086027	snoRNA:Or-CD1	FBgn0020306	dom	FBgn0035523	CG1311	FBgn0037489	CG1234	FBgn0036920	CG8004	FBgn0051531		FBgn0030683	CG8239	FBgn0030529	Clic	FBgn0038436	Gyc-89Db	FBgn0039595	AR-2	FBgn0037936	CG6908	FBgn0038113	CG11668	FBgn0052793	CG32793	FBgn0262237	mir-2491					FBgn0051436	CG31436	FBgn0259740	CG42394	FBgn0039114	Lsd-1	FBgn0038547	CG17803	FBgn0036781	CG13699	FBgn0039277	CG13650	FBgn0085350	inaF-C	FBgn0061197	SIP2
FBgn0033752	CG8569	FBgn0034722	Rtf1	FBgn0000395	cv-2	FBgn0035524	CG11583	FBgn0037504	CG1142	FBgn0036921	RhoGDI	FBgn0026620	tacc	FBgn0030686	mRpL3	FBgn0030541	CG11584	FBgn0038466	CG8907	FBgn0039596	CG10000	FBgn0042110	CG18765	FBgn0038136	CG8774	FBgn0025645	CG3598	FBgn0058068	CR40068					FBgn0045761	CHKov1	FBgn0037846	CG6574	FBgn0053111	CG33111	FBgn0038548	CG17806	FBgn0262998	CR43306	FBgn0039332	alrm	FBgn0250871	pot	FBgn0033710	CG17739
FBgn0003527	stil	FBgn0022986	qkr58E-1	FBgn0010415	Sdc	FBgn0015829	TfIIEbeta	FBgn0043853	snoRNA:MeU5-C46	FBgn0036922	CG14182	FBgn0037280	CG1126	FBgn0026374	Rhp	FBgn0002917	na	FBgn0038485	CG5255	FBgn0039609	CG14529	FBgn0037976	Tk	FBgn0038140	CG8784	FBgn0029643	CG14420							FBgn0039328	CHKov2	FBgn0037856	CG4674	FBgn0039130	CG5854	FBgn0038567	CG14316	FBgn0011706	rpr	FBgn0261287	ymp	FBgn0030369	Cyp318a1	FBgn0054021	CG34021
FBgn0022764	Sin3A	FBgn0022985	qkr58E-2	FBgn0034631	CG10496	FBgn0035541	CG15019	FBgn0004901	Prat	FBgn0036928	Tom20	FBgn0010051	Itp-r83A	FBgn0001105	Gbeta13F	FBgn0030569	CG9411	FBgn0038487	TwdlW	FBgn0039611	CG14528	FBgn0037993	dpr15	FBgn0027610	Dic1	FBgn0029644	CG14421							FBgn0039354	Lgr3	FBgn0040251	Ugt86Di	FBgn0039131	CG12268	FBgn0038568	CG14315	FBgn0262969	CR43280	FBgn0039358	CG5028	FBgn0259680	Pkcdelta	FBgn0033723	CG13155
FBgn0050055	CR30055	FBgn0019949	Cdk9	FBgn0003731	Egfr	FBgn0015805	Rpd3	FBgn0260723	CG42550	FBgn0024814	Clc	FBgn0250753	exba	FBgn0030701	CG16952	FBgn0030570	CG12540	FBgn0038498	beat-IIa	FBgn0039617	CG14521	FBgn0037996	CG4830	FBgn0023495	Lip3	FBgn0029646	CG14423							FBgn0039402	vps2	FBgn0262972	CR43283	FBgn0015795	Rab7	FBgn0028499	CG7985	FBgn0036790	star1	FBgn0039360	CLS	FBgn0030425	CG3775	FBgn0033733	CG8834
FBgn0033757	muskelin	FBgn0034750	CG3732	FBgn0260720	CR42547	FBgn0027914		FBgn0037543	CG10903	FBgn0052227	gogo	FBgn0082961	snoRNA:Psi28S-3385b	FBgn0042650	disco-r	FBgn0024753		FBgn0262871	lute	FBgn0039645	CG11898	FBgn0038007	Cyp313a3	FBgn0038146	CG9799	FBgn0029647	CG17959							FBgn0261833	CG42765	FBgn0037897	CG5270	FBgn0020647	KrT95D	FBgn0038581	CG14314	FBgn0036808	Dic4	FBgn0066101	LpR1	FBgn0000346	comt	FBgn0033734	CG8520
FBgn0028683	spt4	FBgn0020257	ppa	FBgn0034646	Rae1	FBgn0035626	lin-28	FBgn0037551	Gie	FBgn0036974	eRF1	FBgn0082962	snoRNA:Psi28S-3385a	FBgn0030729	CG12507	FBgn0030590	CG9518	FBgn0038507	CG5863	FBgn0015129	DopR2	FBgn0038009	CG17738	FBgn0262323	mir-252	FBgn0029648	CG3603							FBgn0051072	Lerp	FBgn0037901	CG6744	FBgn0039140	Miro	FBgn0038590	CG12320	FBgn0036814	CG14073	FBgn0039368	CG17196	FBgn0030478	CG1640	FBgn0033735	CG8525
FBgn0033761	CG8778	FBgn0034791	CG3501	FBgn0034654	CG10306	FBgn0083044	snoRNA:Psi18S-1397	FBgn0001138	grn	FBgn0001259	in	FBgn0082978	snoRNA:Psi28S-3091b	FBgn0260450	CalpC	FBgn0030591	CG9517	FBgn0038510	CG14331	FBgn0013972	Gycalpha99B	FBgn0010040	GstD4	FBgn0038159	CG14369	FBgn0029649	CG4116							FBgn0051075	CG31075	FBgn0262081	Csk	FBgn0039141	spas	FBgn0004618	gl	FBgn0085284	blos3	FBgn0039369	CG17195	FBgn0052635	Neto	FBgn0050056	CG30056
FBgn0033762	CG8632	FBgn0010660	Nup214	FBgn0003687	Tbp	FBgn0052418	vito	FBgn0262994	CR43302	FBgn0036987	CG5274	FBgn0082979	snoRNA:Psi28S-3091a	FBgn0030742	CG9919	FBgn0030592	CG9514	FBgn0085448		FBgn0086061	snoRNA:Or-CD8	FBgn0010041	GstD5	FBgn0038160	CG9759	FBgn0010296	ng4							FBgn0051076	CG31076	FBgn0259227	CG42327	FBgn0001230	Hsp68	FBgn0038612	cona	FBgn0262351	CG43049	FBgn0039379	CG5886	FBgn0030491	CG15753	FBgn0004435	Galpha49B
FBgn0033766	CG8771	FBgn0034803	CG9849	FBgn0004362	HmgD	FBgn0086694	Bre1	FBgn0037561	CG9630	FBgn0083120	Uhg8	FBgn0082954	snoRNA:Psi28S-3571	FBgn0259923	2013-09-04	FBgn0260006	drd	FBgn0038522		FBgn0039719	CG15515	FBgn0010042	GstD6	FBgn0038161	CG9269	FBgn0028665	VhaAC39-1							FBgn0039473	CG17191	FBgn0037933	Ho	FBgn0039151	CG13607	FBgn0038626	CG7691	FBgn0036839	CG18136	FBgn0039386	CG5948	FBgn0004169	up	FBgn0261625	CG42708
FBgn0033773	mos	FBgn0003900	twi	FBgn0050404	Tango11	FBgn0003984	vn	FBgn0037573	eIF4AIII	FBgn0036999	isoQC	FBgn0086662	snoRNA:Psi28S-3186	FBgn0030805	wus	FBgn0261703	gce	FBgn0038526	CG14327	FBgn0004622	Takr99D	FBgn0010044	GstD8	FBgn0038165	Task6	FBgn0040907	mRpL33							FBgn0039474	CG6283	FBgn0003312	sad	FBgn0039155	Kal1	FBgn0004876	cdi	FBgn0036848	CG10424	FBgn0039387	MCO3	FBgn0030532	CG11071	FBgn0050052	Obp49a
FBgn0033781	CG13319	FBgn0010622	l(2)06496	FBgn0034657	LBR	FBgn0052409	CG32409	FBgn0004908	Arf84F	FBgn0037009	CG5104	FBgn0082988	snoRNA:Psi28S-2442b	FBgn0030815	CG8945	FBgn0030634	CG9164	FBgn0016650	Lgr1	FBgn0015542	sima	FBgn0038034	Cyp9f3Psi	FBgn0038183	CG9286	FBgn0029716	CG3546							FBgn0039475	CG6277	FBgn0037960	mthl5	FBgn0039178	CG6356	FBgn0038747	RhoGAP92B	FBgn0036849	CG14079	FBgn0039396	CcapR	FBgn0263115	mamo	FBgn0033769	CG8768
FBgn0033783	CG17019	FBgn0034814	CG9890	FBgn0034674	CG9304	FBgn0035656	CG10479	FBgn0051460	CG31460	FBgn0037011	CG4858	FBgn0082989	snoRNA:Psi28S-2442a	FBgn0082999	snoRNA:Psi28S-1192c	FBgn0026374	Rhp	FBgn0038541	TyrRII	FBgn0051031	CG31031	FBgn0250910	Octbeta3R	FBgn0038199	CCHa1	FBgn0029804	CG3097							FBgn0039476	CG6271	FBgn0260744	Tango9	FBgn0262147		FBgn0051213	CG31213	FBgn0036860	CG14086	FBgn0000206	boss	FBgn0260482	CG32599	FBgn0011227	ox
FBgn0259876	Cap-G	FBgn0021979	l(2)k09913	FBgn0034707	MED16	FBgn0035689	CG7376	FBgn0037611	CG11755	FBgn0001323	knrl	FBgn0004878	cas	FBgn0004854	B-H2	FBgn0259110	mmd	FBgn0262562	CG43102	FBgn0039748	CG15529	FBgn0028374	hug	FBgn0011582	DopR	FBgn0259149	CG42264							FBgn0243514	eater	FBgn0037974	CG12224	FBgn0039189	CG18528	FBgn0038773	CG10887	FBgn0052206	CG32206	FBgn0039413	CG14556	FBgn0030605	CG5548	FBgn0050488	CG30488
FBgn0020370	TppII	FBgn0046253	CG3502	FBgn0013272	Gp150	FBgn0035690	CG10274	FBgn0037617	CG8145	FBgn0001320	kni	FBgn0037374	jagn	FBgn0011758	B-H1	FBgn0030729	CG12507	FBgn0053547	Rim	FBgn0039759	CG9733	FBgn0038072	CG6225	FBgn0013767	Crz	FBgn0029811	Cpr5C							FBgn0085322	CG34293	FBgn0037975	CG3397	FBgn0039203	CG13618	FBgn0038795	CG4335	FBgn0036868	CG14087	FBgn0039415	CG6142	FBgn0030610	CG9065	FBgn0050486	CG30486
FBgn0086532	Spt-I	FBgn0003977	vir	FBgn0085236	CG34207	FBgn0022699	D19B	FBgn0037621	CG9797	FBgn0037026	CG3634	FBgn0051559	CG31559	FBgn0030842		FBgn0030742	CG9919	FBgn0000363		FBgn0004573	5-HT7	FBgn0002719	Men	FBgn0085417	CG34388	FBgn0029813	CG15766							FBgn0262588	CG43125	FBgn0037998	CG4848	FBgn0004190	snRNA:U6:96Ac	FBgn0002869	MtnB	FBgn0036880	Cpr76Bc	FBgn0039420	CG6154	FBgn0030668	CG8128	FBgn0033778	CG3790
FBgn0053182	Kdm4B	FBgn0034859	CG3520	FBgn0034722	Rtf1	FBgn0035713	CG10107	FBgn0037633	CG9839	FBgn0028402	Sin	FBgn0037421	CG15594	FBgn0250788	beta-Spec	FBgn0030761	CG9784	FBgn0259934		FBgn0010015	CanA1	FBgn0038084	beat-Vc	FBgn0038234	mRpL11	FBgn0052750	CG32750							FBgn0262587	CG43124	FBgn0000455	Dip-C	FBgn0051125	CG31125	FBgn0038815	CG5466	FBgn0036882	CG9279	FBgn0263118	tx	FBgn0030718	CG9172	FBgn0050487	CG30487
FBgn0027079	Aats-val	FBgn0261786	mi	FBgn0053200	ventrally-expressed-protein-D	FBgn0035725	Mis12	FBgn0037634	CG8359	FBgn0037083	CG5656	FBgn0261972		FBgn0024184	unc-4	FBgn0030763	CG9782	FBgn0038606	CG15803	FBgn0039816	CG11317	FBgn0051345	CG31345	FBgn0038242	CG14852	FBgn0052751	CG32751							FBgn0085465	CG34436	FBgn0086134	Pros25	FBgn0004885	tok	FBgn0017557	Pros28.1A	FBgn0036890	CG9368	FBgn0029170	TwdlT	FBgn0030733	CG3560	FBgn0033794	CG13326
FBgn0005654	lat	FBgn0010501	Dcp-1	FBgn0022984	qkr58E-3	FBgn0001104	G-ialpha65A	FBgn0262614	pyd	FBgn0037087	CG7519	FBgn0037447	Neurochondrin	FBgn0030870	CG6398	FBgn0052571	TwdlX	FBgn0038641	CG7708	FBgn0039818	CG11318	FBgn0038087	beat-Va	FBgn0038257	smp-30	FBgn0040069	vanin-like							FBgn0053346	CG33346	FBgn0001296	kar	FBgn0039236	CG13639	FBgn0038828	CG17270	FBgn0260874	Ir76a	FBgn0039480	Cpr97Ea	FBgn0015336	CG15865	FBgn0085468	CG34439
FBgn0033806	FLASH	FBgn0034878	pita	FBgn0022986	qkr58E-1	FBgn0045759	bin	FBgn0037644	CG11964	FBgn0037092	M6	FBgn0085326	CG34297	FBgn0030887	CG6867	FBgn0052570	TwdlY	FBgn0015323	VAChT	FBgn0039820	CG15554	FBgn0038092	beat-Vb	FBgn0038267	CG17304	FBgn0029848	Btd							FBgn0039593	CG9989	FBgn0011745	Arp87C	FBgn0039239	CG13641	FBgn0038837	CG3822	FBgn0036909	CG15881	FBgn0039481	Cpr97Eb	FBgn0000152	Axs	FBgn0053138	CG33138
FBgn0033810	CG4646	FBgn0004795	retn	FBgn0034734	CG4554	FBgn0259173	corn	FBgn0027503	CG11970	FBgn0052441	CG32441	FBgn0261638	CR42721	FBgn0030947	CG6696	FBgn0052569	TwdlZ	FBgn0038653	CG18208	FBgn0013973	Gycbeta100B	FBgn0038130	CG8630	FBgn0028662	VhaPPA1-1	FBgn0029854	CG3566							FBgn0039595	AR-2	FBgn0038079	CG14394	FBgn0039265	CG11790	FBgn0038838	TotB	FBgn0052219	CG32219	FBgn0039483	CG14259	FBgn0030804	CG13002	FBgn0085341	CG34312
FBgn0043010	Fsn	FBgn0034908	CG5543	FBgn0003175	px	FBgn0261111	BHD	FBgn0040534	CG11985	FBgn0037108	CG11306	FBgn0000439	Dfd	FBgn0010383	Cyp18a1	FBgn0001250	if	FBgn0085313	CG34284	FBgn0051004	CG31004	FBgn0038135	CG8773	FBgn0038282	dpr9	FBgn0259204	CG42308							FBgn0027578	CG14526	FBgn0038083	CG5999	FBgn0039297	CG11852	FBgn0044809	TotZ	FBgn0085287	CG34258	FBgn0243514	eater	FBgn0052563	CG32563	FBgn0033807	AQP
FBgn0033812	Pex13	FBgn0028411	Nxt1	FBgn0019949	Cdk9	FBgn0035761	RhoGEF4	FBgn0037656	CG11986	FBgn0053291		FBgn0003339	Scr	FBgn0030961	CG7058	FBgn0024941	RSG7	FBgn0038659	endoA	FBgn0039833	CG15564	FBgn0038136	CG8774	FBgn0038306	Art3	FBgn0029942	CG2059							FBgn0039632	Cul-5	FBgn0041710	yellow-f	FBgn0051370	CG31370	FBgn0038861	CG7009	FBgn0053710	CG33710	FBgn0039518	CG13978	FBgn0030826	CG12995	FBgn0033817	CG4688
FBgn0033836	CG18278	FBgn0034921	Dcp1	FBgn0034750	CG3732	FBgn0035763	CG8602	FBgn0037657	hyx	FBgn0037120	CG11247	FBgn0260642	Antp	FBgn0052541		FBgn0030798	CG13003	FBgn0038734	CG11453	FBgn0039856	CG1774	FBgn0262844	CG43208	FBgn0085345	CG34316	FBgn0085366	CG34337							FBgn0028692	Rpn2	FBgn0038110	CG8031	FBgn0053494	CG33494	FBgn0038870	Oga	FBgn0261507	CG42655	FBgn0051057	tau	FBgn0030829	CG12998	FBgn0033818	CG4712
FBgn0260475	CG30059	FBgn0034923	Upf3	FBgn0020257	ppa	FBgn0011640	lark	FBgn0037659	Kdm2	FBgn0037121	Rpb8	FBgn0037467	CG1104	FBgn0261461	RhoGAP18B	FBgn0085355	CG34326	FBgn0083975	CG34139	FBgn0039873	Smvt	FBgn0038140	CG8784	FBgn0001219	Hsc70-4	FBgn0029969	CG10932							FBgn0014427	CG11899	FBgn0038113	CG11668	FBgn0262319	mir-1000	FBgn0038881	CG16791	FBgn0261506	CG42654	FBgn0051058	CG31058	FBgn0030830	CG5172	FBgn0033819	CG4714
FBgn0086757	cbs	FBgn0034926		FBgn0050265	CG30265	FBgn0035767	CG8596	FBgn0037669	CG9740	FBgn0052448	CG32448	FBgn0261238	Alh	FBgn0030992	CG33253	FBgn0030884	CG6847	FBgn0038814	CG15923	FBgn0040370	CG13375	FBgn0040553	CG14374	FBgn0038319	mRpL9	FBgn0030007	CG2263							FBgn0263236	SP1029	FBgn0038114	CG11670	FBgn0262904	CR43259	FBgn0261841	pre-mod(mdg4)-AD	FBgn0259148	CG42263	FBgn0002772	Mlc1	FBgn0085356	CG34327	FBgn0033820	CG4716
FBgn0040477	cid	FBgn0034933	CG3735	FBgn0034795	MED23	FBgn0035769	CTCF	FBgn0037670	CG8436	FBgn0046301	CG7148	FBgn0051146	Nlg1	FBgn0031016	kek5	FBgn0030887	CG6867	FBgn0051201	GluRIIE	FBgn0011822	pcl	FBgn0038148	CG14377	FBgn0038326	CG5044	FBgn0030026	sni							FBgn0039670	CG7567	FBgn0038166	CG9588	FBgn0002632	m6	FBgn0038887	CG7907	FBgn0036926	CG7646	FBgn0039577	CG12516	FBgn0040877	CG12994	FBgn0033828	CG17048
FBgn0033844	bbc	FBgn0034939	thoc5	FBgn0034796	CG3700	FBgn0082598	akirin	FBgn0037680	CG8121	FBgn0000100	RpLP0	FBgn0037537	CG2767	FBgn0052532	CG32532	FBgn0052547	CG32547	FBgn0038818	Nep4	FBgn0040349	CG3699	FBgn0051337	CG31337	FBgn0262483	Rbp	FBgn0020653	Trxr-1							FBgn0039671	CG11470	FBgn0000454	Dip-B	FBgn0039402	vps2	FBgn0008651	lbl	FBgn0013303	Nca	FBgn0039620	CG1443	FBgn0030839	CG5613	FBgn0033831
FBgn0033845	mars	FBgn0003008	or	FBgn0010660	Nup214	FBgn0052372	ltl	FBgn0260010	rump	FBgn0037165	CG11437	FBgn0037541	CG2747	FBgn0261593	RpS10b	FBgn0030947	CG6696	FBgn0024944	Oamb	FBgn0040364	CG11378	FBgn0038159	CG14369	FBgn0038337	CG6125	FBgn0030041	CG12116							FBgn0085325	CG34296	FBgn0259731	tal-2A	FBgn0039415	CG6142	FBgn0015229	glec	FBgn0036931	CG14183	FBgn0039647	CG14509	FBgn0030844	ppk23	FBgn0033832
FBgn0033846	mip120	FBgn0034948	Gadd34	FBgn0003900	twi	FBgn0035824	CG8281	FBgn0014022	Rlb1	FBgn0037182	ArfGAP3	FBgn0010812	unc-45	FBgn0052529	Hers	FBgn0010383	Cyp18a1	FBgn0259222	CG42322	FBgn0040363	CG11384	FBgn0261818	CG42760	FBgn0038341	CG14869	FBgn0030107	CG15370							FBgn0039688	Kul	FBgn0259730	tal-1A	FBgn0053970	CG33970	FBgn0051465	CG31465	FBgn0052228	CG32228	FBgn0039648	CG14515	FBgn0030853	CG5703	FBgn0050060	CG30060
FBgn0053156	CG33156	FBgn0013764	Chi	FBgn0046253	CG3502	FBgn0035829	HP4	FBgn0037703	JHDM2	FBgn0053169	CG33169	FBgn0037552	CG7800	FBgn0031118	RhoGAP19D	FBgn0030961	CG7058	FBgn0038839	CG10830	FBgn0028550	Atf3	FBgn0261819	CG42761	FBgn0051446	CG31446	FBgn0040234	c12.2							FBgn0262112	sro	FBgn0262992	CR43300	FBgn0039430	CG5455	FBgn0038919	CG17843	FBgn0261832	CG42764	FBgn0062442	CG1458	FBgn0003380	Sh	FBgn0019928	Ser8
FBgn0033871	CG13339	FBgn0034962	MAN1	FBgn0003977	vir	FBgn0035830	CG8209	FBgn0260722	CR42549	FBgn0037199	CG11137	FBgn0037565	CG9626	FBgn0031135	CR11235	FBgn0030964	Pvf1	FBgn0051191	CG31191	FBgn0024361	Tsp2A	FBgn0038160	CG9759	FBgn0038354	CG5404	FBgn0028327	l(1)G0320							FBgn0039714	CG7816	FBgn0038214	CG9616	FBgn0039431	CG6490	FBgn0013948		FBgn0011591	fng	FBgn0039656	CG11951	FBgn0030886	CG12672	FBgn0262821	CG43192
FBgn0086356	tum	FBgn0011726	tsr	FBgn0034859	CG3520	FBgn0011817	nmo	FBgn0037708	CG9386	FBgn0037200	CG11109	FBgn0051462	CG31462	FBgn0031195	CG17600	FBgn0030980	CG7406	FBgn0002921	Atpalpha	FBgn0053513	Nmdar2	FBgn0003060	CG9757	FBgn0038400	CG5903	FBgn0011770	Gip							FBgn0039742	CG15528	FBgn0262808	CG43179	FBgn0040607	CG14244	FBgn0263117	CG34377	FBgn0037037	CG10588	FBgn0039667	CG2010	FBgn0004028	wupA	FBgn0033856	CG13334
FBgn0033882		FBgn0086129	snama	FBgn0261786	mi	FBgn0262442	mir-2501	FBgn0027950	MBD-like	FBgn0037206	CG12768	FBgn0037645	CG11966	FBgn0031196	CG17599	FBgn0261461	RhoGAP18B	FBgn0038894	CG15497	FBgn0025393	CG14795	FBgn0038161	CG9269	FBgn0063649	CG6006	FBgn0052687	CG32687							FBgn0015221	Fer2LCH	FBgn0038250	CG3505	FBgn0003267	ro	FBgn0038958	CG13857	FBgn0037040	CG12983	FBgn0013972	Gycalpha99B	FBgn0053639	CG33639	FBgn0033860	S-Lap5
FBgn0033884	CG13344	FBgn0034975	enok	FBgn0010501	Dcp-1	FBgn0035854	CG8005	FBgn0037720	CG8312	FBgn0037207	Mes2	FBgn0037659	Kdm2	FBgn0040030	CG2893	FBgn0030992	CG33253	FBgn0038901	burs	FBgn0025391	Scgdelta	FBgn0038194	Cyp6d5	FBgn0038407	CG6126	FBgn0052669	CG32669							FBgn0026190	PH4alphaMP	FBgn0051314	Neu3	FBgn0003495	spz	FBgn0053093	CG33093	FBgn0053286	CG33286	FBgn0024841	Pcd	FBgn0030928	CG15044	FBgn0033861	CG12464
FBgn0033886	CG13349	FBgn0034987	CG3363	FBgn0034878	pita	FBgn0035872	CG7185	FBgn0005585	Crc	FBgn0024733	RpL10	FBgn0037664	CG8420			FBgn0030997	CG7990	FBgn0003867	tsl	FBgn0023541	Cyp4d14	FBgn0038199	CCHa1	FBgn0040237	bor	FBgn0030239	CG17333							FBgn0039788	Rpt6R	FBgn0011217	eff	FBgn0039480	Cpr97Ea	FBgn0039002	CG17625	FBgn0037042	CG12984	FBgn0051038	CG31038	FBgn0030935	CG15048	FBgn0033862	CG6209
FBgn0033890	Ctf4	FBgn0034988	CG3362	FBgn0034879	Rrp4	FBgn0010825	Gug	FBgn0037728	CG16817	FBgn0058045	CG40045	FBgn0261241	Vps16A			FBgn0052532	CG32532	FBgn0013759	CASK	FBgn0004397	Vinc	FBgn0011582	DopR	FBgn0038414	CG6901	FBgn0030244	CG2157							FBgn0000416	Sap-r	FBgn0038321	CG6218	FBgn0039481	Cpr97Eb	FBgn0039006	Cyp6d4	FBgn0037046	CG10581	FBgn0003861	trp	FBgn0030941	wgn	FBgn0033863	CG13337
FBgn0033891	CG8067	FBgn0035001	slik	FBgn0015277	Pi3K59F	FBgn0035900	ZC3H3	FBgn0037737	Pnn	FBgn0063670	CG40228	FBgn0037680	CG8121			FBgn0027358	Tim9b	FBgn0038926	CG13409	FBgn0261451	trol	FBgn0051321	CG31321	FBgn0038431	CG10405	FBgn0003965	v							FBgn0039817	CG15553	FBgn0041188	Atx2	FBgn0039494	grass	FBgn0039030	CG6660	FBgn0020294	ko	FBgn0002773	Mlc2	FBgn0030976	CG7378	FBgn0033864	CG18368
FBgn0020620	RN-tre	FBgn0035021	CG4622	FBgn0015903	apt	FBgn0017430	Nelf-E	FBgn0051514	CR31514	FBgn0037213	CG12581	FBgn0014022	Rlb1			FBgn0031064	CG12531	FBgn0259736	CG42390	FBgn0024997	CG2681	FBgn0013767	Crz	FBgn0038435	Gyc-89Da	FBgn0030251	CG2145							FBgn0039818	CG11318	FBgn0038341	CG14869	FBgn0039495	CG5909	FBgn0041225	Gr94a	FBgn0037050	CG10566	FBgn0039758	CG9737	FBgn0047095	pncr004:X	FBgn0033868	S-Lap7
FBgn0040752	Prosap	FBgn0035025	uri	FBgn0016762	angel	FBgn0020633	Mcm7	FBgn0037802	Sirt6	FBgn0037240	Cont	FBgn0260722	CR42549			FBgn0052528	CG32528	FBgn0038983	CG5326	FBgn0024980	Syx4	FBgn0038237	Pde6	FBgn0038436	Gyc-89Db	FBgn0259101	CG42249							FBgn0039844	CG1607	FBgn0038365	CG9593	FBgn0046247	CG5938	FBgn0039059	CG13829	FBgn0037060	CG10508	FBgn0261704	CG42740	FBgn0031002	CG14196	FBgn0050484	CG30484
FBgn0033897	Rcd1	FBgn0035027	CG3511	FBgn0010278	Ssrp	FBgn0035954	Doc3	FBgn0037809	CG12818	FBgn0086605	CG9853	FBgn0037708	CG9386			FBgn0031097	obst-A	FBgn0038986	CG5278	FBgn0040384	CG32795	FBgn0038243	CG8066	FBgn0027109	npf	FBgn0015245	Hsp60							FBgn0086378	Alg-2	FBgn0003319	Sb	FBgn0262613	CG43139	FBgn0011596	fzo	FBgn0004865	Eip78C	FBgn0039765	mRpS18C	FBgn0031021	CG12203	FBgn0050485	CG30485
FBgn0086895	pea	FBgn0035028	Start1	FBgn0034908	CG5543	FBgn0035956	Doc2	FBgn0037816	CG6345	FBgn0037251	CG9804	FBgn0005585	Crc			FBgn0022770	Peritrophin-A	FBgn0039009	CG13842	FBgn0029639	CG14419	FBgn0038246	CG14853	FBgn0022344	CG10340	FBgn0027359	Tim8							FBgn0086917	spok	FBgn0038412	Zip3	FBgn0005659	Ets98B	FBgn0039089	beat-IV	FBgn0037107	CG7166	FBgn0027654	jdp	FBgn0027291	l(1)G0156	FBgn0033880	CG6553
FBgn0033899	CG13016	FBgn0259742	CG42360	FBgn0028411	Nxt1	FBgn0028789	Doc1	FBgn0051390	MED7	FBgn0037261	CG9775	FBgn0037737	Pnn			FBgn0259162	RunxB	FBgn0039024	CG4721	FBgn0025643	CG3588	FBgn0038262	CG14857	FBgn0015019	Cctgamma	FBgn0030305	CG1749							FBgn0039890	CG2316	FBgn0038428	CG14894	FBgn0261618	larp	FBgn0053337	CG33337	FBgn0053291		FBgn0083991	CG34155	FBgn0004057	Zw	FBgn0033883	CG16935
FBgn0033901	O-fut1	FBgn0085243	CG34214	FBgn0021895	ytr	FBgn0035968	Slc45-1	FBgn0037831	Cap-H2	FBgn0037270	CG9769	FBgn0037739	CG12948			FBgn0083981	RunxA	FBgn0039038	CG6688	FBgn0040393	CG14265	FBgn0028662	VhaPPA1-1	FBgn0085307	CG34278	FBgn0001218	Hsc70-3							FBgn0051999	CG31999	FBgn0051217	modSP	FBgn0053346	CG33346	FBgn0039092	CG16723	FBgn0053292		FBgn0039807	CG15546	FBgn0031066	CoVIb	FBgn0033888	CG18568
FBgn0000289	cg	FBgn0260456	CG4806	FBgn0024234	gbb	FBgn0004379	Klp67A	FBgn0260944	Rbp1	FBgn0026620	tacc	FBgn0261599	RpS29			FBgn0085387	shakB	FBgn0039048	CG17111	FBgn0262656	dm	FBgn0038282	dpr9	FBgn0261847	CG42779	FBgn0030411	CG2540							FBgn0026777	Rad23	FBgn0015011	Ahcy89E	FBgn0051048		FBgn0039109	CG10365	FBgn0037126	CG14567	FBgn0053773	CG33773	FBgn0031089	CG9572	FBgn0033893	CG18371
FBgn0261276	opa1-like	FBgn0086908	egg	FBgn0025790	TBPH	FBgn0035981	CG4452	FBgn0037841	CG4565	FBgn0026417	Hus1-like	FBgn0086663	snoRNA:Psi18S-1275			FBgn0031196	CG17599	FBgn0039054	CG13830	FBgn0028665	VhaAC39-1	FBgn0038295	Gyc88E	FBgn0051265	CG31265	FBgn0030433	mRpL49							FBgn0052850	CG32850	FBgn0038460	CG18622	FBgn0039612	CG14523	FBgn0039124	CG13597	FBgn0037133	CG7370	FBgn0000313	chp	FBgn0031117	CG1702	FBgn0259183	CG42287
FBgn0033915	CG8485	FBgn0041205	key	FBgn0034921	Dcp1	FBgn0035987	CG3689	FBgn0037848	Tsp86D	FBgn0037279	CG1129	FBgn0051514	CR31514			FBgn0052499	Cda4	FBgn0039053	CG6738	FBgn0025613	CG3081	FBgn0038346	CG14872	FBgn0038481	CG17475	FBgn0030459	CG12723							FBgn0016126	CaMKI	FBgn0038465	Irc	FBgn0027578	CG14526	FBgn0039137	CG13604	FBgn0000560	eg	FBgn0039835	mRpL32	FBgn0083956	CG34120	FBgn0259184	CG42288
FBgn0033916	CG8494	FBgn0035073	CG16896	FBgn0262619	DNA-ligI	FBgn0015296	Shc	FBgn0037874	Tctp	FBgn0037280	CG1126	FBgn0037758	CG9467			FBgn0262237	mir-2491	FBgn0039087	CG10168	FBgn0260971	CG42594	FBgn0051446	CG31446	FBgn0051266	CG31266	FBgn0040309	Jafrac1							FBgn0026199	myo	FBgn0028992	sds22	FBgn0259220	Doa	FBgn0020647	KrT95D	FBgn0052448	CG32448	FBgn0054046	CR34046	FBgn0024251	bbx	FBgn0262215	mir-989
FBgn0261270	SelD	FBgn0035082	CG2811	FBgn0034926		FBgn0036000	CG3434	FBgn0037876	CG4820	FBgn0004183	snRNA:U1:82Eb	FBgn0262419	mir-277			FBgn0040030	CG2893	FBgn0039089	beat-IV	FBgn0029746	CG15465	FBgn0038353	CG5399	FBgn0051267	CG31267	FBgn0030480	Tim9a							FBgn0039927	CG11155	FBgn0025456	CREG	FBgn0039637	CG11880	FBgn0001230	Hsp68	FBgn0262737	mub	FBgn0000557	Ef1alpha100E	FBgn0025882	snoRNA:MeU6-A47	FBgn0033900	CG8257
FBgn0033921	tej	FBgn0027599	CG2790	FBgn0034939	thoc5	FBgn0036018	CG3335	FBgn0004595	pros	FBgn0037299	CG1115	FBgn0001235	hth			FBgn0085779	CR40963	FBgn0039106	CG10301	FBgn0029748	CG15464	FBgn0038380	CG14877	FBgn0038505	CG17283	FBgn0052633	CG32633							FBgn0039924	CG17471	FBgn0038504	Sur-8	FBgn0039642	CG11882	FBgn0039149	CG18428	FBgn0037164	CG11438	FBgn0003065	CG2150	FBgn0031187	CG14619	FBgn0033904	CG18327
FBgn0033925	CG8617	FBgn0035088	CG3776	FBgn0034961	CG3163	FBgn0036035	CG18178	FBgn0026064	KP78a	FBgn0037312	CG11999	FBgn0037831	Cap-H2			FBgn0085828	CR42195	FBgn0039107	CG10300	FBgn0259150	CG42265	FBgn0013334	Sap47	FBgn0038507	CG5863	FBgn0030511	CG11158							FBgn0058469	CR40469	FBgn0038530	AttD	FBgn0014427	CG11899	FBgn0039155	Kal1	FBgn0037169	CG11404	FBgn0024891	ferrochelatase	FBgn0069973	CG40485	FBgn0050073	Obp50b
FBgn0033928	Arc2	FBgn0003715	CG16778	FBgn0034964	IntS1	FBgn0036036	CG14174	FBgn0037899	RpL24-like	FBgn0003275	RpII18	FBgn0261380	mRpL37					FBgn0039108	CG10232	FBgn0029826	CG6041	FBgn0262028	CR42839	FBgn0038510	CG14331	FBgn0030518	CG11134							FBgn0029523	CR18275	FBgn0038535	alt	FBgn0039684	Obp99d	FBgn0039157	Myo95E	FBgn0037171	CG14459	FBgn0039886	CG2003	FBgn0016975	stnB	FBgn0033952	Adgf-E
FBgn0033929	Tfb1	FBgn0001325	Kr	FBgn0011726	tsr	FBgn0044049	Ilp4	FBgn0037918	CG6791	FBgn0041191	Rheb	FBgn0037838	CG4089					FBgn0065098	RNaseMRP:RNA	FBgn0029827	CG6048	FBgn0063649	CG6006	FBgn0038541	TyrRII	FBgn0030519	CG11151							FBgn0004648	svr	FBgn0038547	CG17803	FBgn0085325	CG34296	FBgn0039179		FBgn0027339	jim	FBgn0069923	CG41128			FBgn0033953	CG12861
FBgn0033934	CG17385	FBgn0020660	eIF-4B	FBgn0028552	gammaSnap	FBgn0004390	Gap1	FBgn0037926	Elp1	FBgn0082962	snoRNA:Psi28S-3385a	FBgn0086056	snoRNA:Me18S-A425					FBgn0016754	sba	FBgn0029846		FBgn0038407	CG6126	FBgn0053547	Rim	FBgn0030537	CG12480							FBgn0020381	Dredd	FBgn0038577	CG12321	FBgn0024841	Pcd	FBgn0262147		FBgn0052461	CG32461	FBgn0259821	CG42402			FBgn0033954	CG12860
FBgn0033935	Sin1	FBgn0260469	CR14578	FBgn0034967	eIF-5A	FBgn0036052	CG10809	FBgn0037931	CG18476	FBgn0082989	snoRNA:Psi28S-2442a	FBgn0086057	snoRNA:Me28S-G2017					FBgn0051140	CG31140	FBgn0029851	CG14445	FBgn0038414	CG6901	FBgn0038597	CG8064	FBgn0030539	CG1368							FBgn0000210	br	FBgn0038582	CG7988	FBgn0039690	CG1969	FBgn0039201	CG13617	FBgn0040056	CG17698	FBgn0085812	CR41601			FBgn0033955	CG12866
FBgn0001332	L	FBgn0046706	Haspin	FBgn0086129	snama	FBgn0027567	CG8108	FBgn0037937	Fer3	FBgn0037347	CG1427	FBgn0037937	Fer3					FBgn0051451	CR31451	FBgn0029864	CG15894	FBgn0038416	CG17930	FBgn0038606	CG15803	FBgn0030540	CG11581							FBgn0029584	CG11509	FBgn0026250	eIF-1A	FBgn0051028	CG31028	FBgn0039214	CG5794	FBgn0058470	CG40470	FBgn0052006	CG32006			FBgn0033961	CG12859
FBgn0024698	Cpsf160	FBgn0035102	CG7049	FBgn0034975	enok	FBgn0052053	CG32053	FBgn0037943	CG14722	FBgn0037351	RpL13A	FBgn0037940	CG14720					FBgn0039152	Rootletin	FBgn0259242	CG42340	FBgn0038419	CG14879	FBgn0038613	Vha100-4	FBgn0052603	CG32603							FBgn0261548	CG42666	FBgn0038595	CG7142	FBgn0000276	CecA1	FBgn0039237	CG13640	FBgn0058064	ARY	FBgn0051997	CG31997			FBgn0033969	CG10202
FBgn0261823	Asx	FBgn0024945	NitFhit	FBgn0034976	CG4049	FBgn0052062	A2bp1	FBgn0086910	l(3)neo38	FBgn0260002	snoRNA:Me28S-U2134b	FBgn0086910	l(3)neo38					FBgn0085319	CG34290	FBgn0027106	inx7	FBgn0038420	CG10311	FBgn0028670	Vha100-2	FBgn0030552	mRpL38							FBgn0026090	CG14812	FBgn0038651	CG14299	FBgn0000277	CecA2	FBgn0051121	CG31121	FBgn0058178	CG40178	FBgn0051999	CG31999			FBgn0013771	Cyp6a9
FBgn0020245	ttv	FBgn0035109	CG13876	FBgn0041706	CG3253	FBgn0000629	E(z)	FBgn0260742	CG12213	FBgn0037352		FBgn0025802	Sbf					FBgn0000036	nAcRalpha-96Aa	FBgn0029930	CG12541	FBgn0038435	Gyc-89Da	FBgn0051229	CG31229	FBgn0030570	CG12540							FBgn0026088	CG14818	FBgn0038682	CG5835	FBgn0000278	CecB	FBgn0039244	CG11069	FBgn0058160	CG40160	FBgn0039896	yellow-h			FBgn0040747	CG12853
FBgn0003742	tra2	FBgn0027587	CG7028	FBgn0021875	Zfrp8	FBgn0036096	CG8003	FBgn0004103	Pp1-87B	FBgn0262125	sec23	FBgn0037956	CG6959					FBgn0000039	nAcRalpha-96Ab	FBgn0085366	CG34337	FBgn0038436	Gyc-89Db	FBgn0038641	CG7708	FBgn0030572	mRpS25							FBgn0052803	CG32803	FBgn0038686	CG5555	FBgn0000279	CecC	FBgn0039255	CG13646	FBgn0260997	CG42598	FBgn0039897	CG1674			FBgn0043530	Obp51a
FBgn0026427	Su(var)2-HP2	FBgn0035110	thoc7	FBgn0034986	mRpS17	FBgn0036104	CG6418	FBgn0038057	CG12267	FBgn0004878	cas	FBgn0037998	CG4848					FBgn0004118	nAcRbeta-96A	FBgn0029504	CHES-1-like	FBgn0038466	CG8907	FBgn0000303	Cha	FBgn0030575	CG5321							FBgn0025624	CG4025	FBgn0038716	CG7342	FBgn0039774	CDase	FBgn0039257	tnc	FBgn0037217	CG14636	FBgn0053481	dpr7			FBgn0262478	CG43068
FBgn0033948	CG12863	FBgn0035121	Tudor-SN	FBgn0034987	CG3363	FBgn0013469	klu	FBgn0038071	CG6234	FBgn0261789	SmD2	FBgn0003651	svp					FBgn0039203	CG13618	FBgn0010329	Tbh	FBgn0051265	CG31265	FBgn0038645	CG7714	FBgn0030587	CG9522							FBgn0023549	Mct1	FBgn0038721	CG16718	FBgn0082582	tmod	FBgn0039265	CG11790	FBgn0261086	Syt14	FBgn0259216	RhoGAP102A			FBgn0259966	Sfp51E
FBgn0033951	CG10139	FBgn0261985	Ptpmeg	FBgn0259185	Ir60b	FBgn0020412	JIL-1	FBgn0087021	Spc25	FBgn0037439	CG10286	FBgn0038045	Sas					FBgn0039208	Esyt2	FBgn0029995	CG2256	FBgn0038482	CG4053	FBgn0038646	CG7715	FBgn0030590	CG9518							FBgn0040392	CG14050	FBgn0053192	MtnD	FBgn0027598	cindr	FBgn0004897	fd96Ca	FBgn0037238	CG1090	FBgn0042696	NfI			FBgn0259737	CG42391
FBgn0050476	ave	FBgn0035136	CG6905	FBgn0035021	CG4622	FBgn0036141	wls	FBgn0020496	CtBP	FBgn0037447	Neurochondrin	FBgn0038071	CG6234					FBgn0039209	CG13624	FBgn0040319	Gclc	FBgn0051267	CG31267	FBgn0038647	CG14302	FBgn0030593	CG9512							FBgn0003996	w	FBgn0016917	Stat92E	FBgn0039804	CG15544	FBgn0039297	CG11852	FBgn0052944	CG32944	FBgn0039900	Syt7			FBgn0033999	CG8093
FBgn0020767	Spred	FBgn0035141	Cypl	FBgn0035027	CG3511	FBgn0036150	Ir68a	FBgn0038150	yellow-e3	FBgn0262801	twr	FBgn0038073	CG14395					FBgn0086059	snoRNA:Me18S-C1280	FBgn0030005	CG2120	FBgn0038498	beat-IIa	FBgn0038653	CG18208	FBgn0030612	CG5599							FBgn0040396	CG3939	FBgn0038809	CG16953	FBgn0039805	Cpr100A	FBgn0053494	CG33494	FBgn0051525	CG31525	FBgn0259214	PMCA			FBgn0001187	Hex-C
FBgn0259112	CG42254	FBgn0035145	MED14	FBgn0260456	CG4806	FBgn0261813	CG42755	FBgn0038151	yellow-e2	FBgn0261638	CR42721	FBgn0038149	CG9796					FBgn0039226	Ude	FBgn0015519	nAcRalpha-7E	FBgn0038510	CG14331	FBgn0038674	CG14285	FBgn0030615	Cyp4s3							FBgn0003374	Sgs4	FBgn0262185	mir-995	FBgn0039808	CG12071	FBgn0002733	HLHmbeta	FBgn0052945	CG32945	FBgn0039908	Asator			FBgn0034007	CG8102
FBgn0015602	BEAF-32	FBgn0035149	MED30	FBgn0035059	CG3894	FBgn0036165	chrb	FBgn0000576	ems	FBgn0003339	Scr	FBgn0053977	CG33977					FBgn0039232	CG13636	FBgn0030040	CG15347	FBgn0085310	CG34281	FBgn0038678	mRpL55	FBgn0030678	CG11679							FBgn0085364	CR34335	FBgn0259215	Ir93a	FBgn0039811	CG15550	FBgn0039411	dys	FBgn0051531		FBgn0022361	Pur-alpha			FBgn0262868
FBgn0033971	CG10209	FBgn0035151	CG17129	FBgn0086908	egg	FBgn0036188	CG7339	FBgn0020510	Abi	FBgn0037469	Dpck	FBgn0038156	CG14372					FBgn0039249	CG11168	FBgn0030052	CG12065	FBgn0038528	CG14326	FBgn0259705	CG42359	FBgn0030686	mRpL3							FBgn0026084	cib	FBgn0028396	TotA	FBgn0039848	lox	FBgn0039431	CG6490	FBgn0051534		FBgn0039909	CG1970			FBgn0050466	CG30466
FBgn0028434	Ercc1	FBgn0035155	RabX6	FBgn0041205	key	FBgn0036207	CG10907	FBgn0003567	su(Hw)	FBgn0261238	Alh	FBgn0038170	CG14367					FBgn0039260	Smg6	FBgn0030079	CG7267	FBgn0262794	CG43175	FBgn0038701	CG18493	FBgn0030692	mRpS30							FBgn0262980	CG43288	FBgn0038846	CG5697	FBgn0002645	Map205	FBgn0040607	CG14244	FBgn0027570	Nep2	FBgn0039911	CG1909			FBgn0034037	CG8214
FBgn0053506	CG33506	FBgn0035162	CG13900	FBgn0262902	CR43257	FBgn0083015	snoRNA:Psi18S-920	FBgn0038235	CG8461	FBgn0037473	CG10068	FBgn0259731	tal-2A					FBgn0039282	Bili	FBgn0086450	su(r)	FBgn0016650	Lgr1	FBgn0051221	CG31221	FBgn0027093	Aats-arg							FBgn0029700	CG15576	FBgn0046763	CG17278	FBgn0027341	Gfat1	FBgn0004903	Rb97D	FBgn0037275	CG14655	FBgn0039915	CG1732			FBgn0022160	Gpo-1
FBgn0053505	U3-55K	FBgn0052479	CG32479	FBgn0023181	Orc4	FBgn0000404	CycA	FBgn0004629	Cys	FBgn0004901	Prat	FBgn0259730	tal-1A					FBgn0039290	CG13654	FBgn0030148	CG3106	FBgn0038542	TyrR	FBgn0026753	Vha13	FBgn0001092	Gapdh2							FBgn0029736	CG4041	FBgn0011672	Mvl	FBgn0016126	CaMKI	FBgn0039462	CG14252	FBgn0037283	CG14658	FBgn0039916	CG9935			FBgn0050093	CG30093
FBgn0013773	Cyp6a22	FBgn0004378	Klp61F	FBgn0035073	CG16896	FBgn0250876	Sema-5c	FBgn0020299	stumps	FBgn0037533	CD98hc	FBgn0013998	Nsf2					FBgn0004509	Fur1	FBgn0259147	CG42262	FBgn0053547	Rim	FBgn0038723	CG6195	FBgn0052576	CG32576							FBgn0004687	Mlc-c	FBgn0025865	Cortactin	FBgn0026199	myo	FBgn0039463	CG18472	FBgn0037284	CG14659	FBgn0005666	bt			FBgn0034076	Jhedup
FBgn0033979	Cyp6a19	FBgn0052318	CG32318	FBgn0035084	CG15861	FBgn0011335	l(3)j2D3	FBgn0003169	put	FBgn0037543	CG10903	FBgn0038195	CG3061					FBgn0039332	alrm	FBgn0052683	CG32683	FBgn0038595	CG7142	FBgn0038750	CG4465	FBgn0030746	CG9981							FBgn0029783	Sirt4	FBgn0015790	Rab11	FBgn0019650	toy	FBgn0039494	grass	FBgn0020280	laf	FBgn0019985	mGluRA			FBgn0034082	CG10734
FBgn0033984	Lap1	FBgn0035194	Psf1	FBgn0035088	CG3776	FBgn0036249	CG11560	FBgn0013981	His4r	FBgn0010812	unc-45	FBgn0020510	Abi					FBgn0039380	CG5890	FBgn0030218	CG1628	FBgn0038606	CG15803	FBgn0038753	CG4459	FBgn0030775	CG9673							FBgn0015794	Rab-RP4	FBgn0000527	e	FBgn0039927	CG11155	FBgn0004197	Ser	FBgn0085335	CG34306	FBgn0010217	ATPsyn-beta			FBgn0034089	CG8446
FBgn0261854	aPKC	FBgn0010333	Rac1	FBgn0005634	zip	FBgn0022959	yps	FBgn0038261	CG14856	FBgn0037550	CG9667	FBgn0262327	mir-2281					FBgn0259146	CG42261	FBgn0030259	CG1545	FBgn0038613	Vha100-4	FBgn0040571	CG17193	FBgn0030786	mRpL22							FBgn0262945	CR43264	FBgn0016700	Rab1	FBgn0039924	CG17471	FBgn0051064	CG31064	FBgn0037295	dpr16	FBgn0004624				FBgn0262026	CG42837
FBgn0033988	pcs	FBgn0035205	CG2469	FBgn0001148	gsb	FBgn0036254	CG5645	FBgn0038275	CG3817	FBgn0037551	Gie	FBgn0004629	Cys					FBgn0039415	CG6142	FBgn0262685	CG43155	FBgn0028670	Vha100-2	FBgn0083975	CG34139	FBgn0083007	snoRNA:Psi28S-1135f							FBgn0029823	CG3011	FBgn0043012	AP-2sigma	FBgn0025835	CG17707	FBgn0051068	CG31068	FBgn0037307	Tim17a2	FBgn0250819	CG33521			FBgn0034097	CG3687
FBgn0033990	CG10265	FBgn0035209	msd1	FBgn0001325	Kr	FBgn0036258	CG5642	FBgn0038306	Art3	FBgn0001138	grn	FBgn0020299	stumps					FBgn0051323	CG31323	FBgn0030309	CG1572	FBgn0038641	CG7708	FBgn0262869	mun	FBgn0030841	CG8568							FBgn0029826	CG6041	FBgn0038881	CG16791	FBgn0024989	CG3777	FBgn0262613	CG43139	FBgn0037313	CG1161	FBgn0025835	CG17707			FBgn0034099	CG15708
FBgn0015371	chn	FBgn0035210	msd5	FBgn0020660	eIF-4B	FBgn0036277	CG10418	FBgn0038307	mRpS10	FBgn0260939	Sgt1	FBgn0038247	Cad88C					FBgn0053970	CG33970	FBgn0002723	Met	FBgn0015323	VAChT	FBgn0002869	MtnB	FBgn0031012	CG8051							FBgn0029831	CG5966	FBgn0262405	mir-998	FBgn0052817	CG32817	FBgn0046258	CG12880	FBgn0001311	kkv	FBgn0261446	CG13377			FBgn0053017	CG33017
FBgn0033993	CG8089	FBgn0003138	Ptp61F	FBgn0046706	Haspin	FBgn0052104	CG32104	FBgn0003600		FBgn0037573	eIF4AIII	FBgn0038273	CG14860					FBgn0263118	tx	FBgn0030331	CG15221	FBgn0000303	Cha	FBgn0038799	CG4288	FBgn0044030	mRpS14							FBgn0029835	CG5921	FBgn0051176	CG31176	FBgn0029526	CR18166	FBgn0261618	larp	FBgn0037323	CG2663	FBgn0029518	CG13376			FBgn0034104	CG15705
FBgn0033994	CG7544	FBgn0028577	pUf68	FBgn0052475	mthl8	FBgn0000625	eyg	FBgn0038320	Sra-1	FBgn0003129	Poxm	FBgn0259823	CG42404					FBgn0039429	CG14238	FBgn0030332	CG9360	FBgn0038659	endoA	FBgn0262146	MtnE	FBgn0031034	CG14205							FBgn0029848	Btd	FBgn0259736	CG42390	FBgn0029524	CG3176	FBgn0027655	htt	FBgn0037326	CG14669	FBgn0040371	CG12470			FBgn0034105	CG7755
FBgn0033995	CG8090	FBgn0035235	CG7879	FBgn0035102	CG7049	FBgn0027936	vih	FBgn0038323	CG6196	FBgn0004908	Arf84F	FBgn0019925	Surf4					FBgn0263289	scrib	FBgn0030349	CG10353	FBgn0261113	Xrp1	FBgn0053192	MtnD	FBgn0031049	Sec61gamma							FBgn0003514	sqh	FBgn0038965	mats	FBgn0040383	CG5254	FBgn0015589	Apc	FBgn0051550	CG31550	FBgn0052816	CG32816			FBgn0050324	CG30324
FBgn0033996	CG11807	FBgn0035247	metl	FBgn0083992	Mkp	FBgn0002466	sti	FBgn0038324	CG5038	FBgn0263231	bel	FBgn0038324	CG5038					FBgn0039434	TwdlM	FBgn0259143	CG42258	FBgn0038700	CG3734	FBgn0038804	CG10877	FBgn0261675	Npc1b							FBgn0086558	Ubi-p5E	FBgn0038966	pinta	FBgn0259144	CG42259	FBgn0039642	CG11882	FBgn0023023	CRMP	FBgn0004034	y			FBgn0050099	CG30099
FBgn0034000	CG11808	FBgn0013753	Bgb	FBgn0024945	NitFhit	FBgn0020388	Pcaf	FBgn0085433	CG34404	FBgn0037609	CG9773	FBgn0085433	CG34404					FBgn0039435	TwdlP	FBgn0030399		FBgn0051221	CG31221	FBgn0083039	snoRNA:Psi18S-301	FBgn0025814	Mgstl							FBgn0028685	Rpt4	FBgn0028688	Rpn7	FBgn0001189	hfw	FBgn0014427	CG11899	FBgn0010772	Xe7	FBgn0023536	CG3156			FBgn0034121	CG6262
FBgn0085216	CG34187	FBgn0035249	CG17249	FBgn0035109	CG13876	FBgn0262524	ver	FBgn0053207	pxb	FBgn0037611	CG11755	FBgn0262397	mir-2c					FBgn0039436	TwdlB	FBgn0030403	CG1824	FBgn0038720	CG6231	FBgn0038811	CG4159	FBgn0064117	CG33714							FBgn0085446	CG34417	FBgn0038981	CG5346	FBgn0261548	CG42666	FBgn0051044	CR31044	FBgn0037364	Rab23	FBgn0029529	CG13365			FBgn0034122	CG15711
FBgn0034008	CG8152	FBgn0013755	Bro	FBgn0035110	thoc7	FBgn0036299	Tsf2	FBgn0038369	Arpc3A	FBgn0037634	CG8359	FBgn0038348	CG18519					FBgn0039437	TwdlL	FBgn0030411	CG2540	FBgn0026753	Vha13	FBgn0082986	snoRNA:Psi28S-2562	FBgn0261386	Gpa2							FBgn0029913	Cht11	FBgn0039008	CG6972	FBgn0026090	CG14812	FBgn0263236	SP1029	FBgn0027608	CG2082	FBgn0040892	CG14634			FBgn0029153	Menl-2
FBgn0004698	mus210	FBgn0035252	CG7970	FBgn0000541	E(bx)	FBgn0036301	CG4069	FBgn0038381	CG3303	FBgn0037645	CG11966	FBgn0038358	CG4525					FBgn0039441	TwdlN	FBgn0259171	Pde9	FBgn0051216	Naam	FBgn0027493	CG17273	FBgn0085828	CR42195							FBgn0029943	Atg5	FBgn0039010	CG4907	FBgn0023550	CG18031	FBgn0039659	CG14506	FBgn0037389	CR10991	FBgn0053082	CG33082			FBgn0029154	Menl-1
FBgn0034009	CG8155	FBgn0035253	CG7971	FBgn0035120	wac	FBgn0015919	caup	FBgn0052856	CG32856	FBgn0040534	CG11985	FBgn0026616	alpha-Man-IIb					FBgn0039444	TwdlD	FBgn0030437	hec	FBgn0038730	CG6300	FBgn0038839	CG10830	FBgn0259849	Su(Ste):CR42418							FBgn0259098	CG42246	FBgn0024958	Irp-1A	FBgn0044047	Ilp6	FBgn0004369	Ptp99A	FBgn0085316	CG34287	FBgn0040368	eIF4E-7			FBgn0034127	CG7848
FBgn0011660	Pms2	FBgn0035254	CG7974	FBgn0259743		FBgn0014343	mirr	FBgn0022787	Hel89B	FBgn0010803	Aats-trp	FBgn0027657	glob1					FBgn0039454	CG14247	FBgn0261379	rad	FBgn0038734	CG11453	FBgn0051191	CG31191									FBgn0030006	CG17982	FBgn0039015	Takl2	FBgn0260753	Pdfr	FBgn0039682	Obp99c	FBgn0037398	CG15580	FBgn0040367	CG11382			FBgn0034129	CG15925
FBgn0000996	dup	FBgn0035271	CG2021	FBgn0004373	fwd	FBgn0261933	SmD1	FBgn0003507	srp	FBgn0037680	CG8121	FBgn0051292	CR31292					FBgn0026562	BM-40-SPARC	FBgn0261388	CG42629	FBgn0038740	CG4562	FBgn0038845	CG10827									FBgn0030025	CG2147	FBgn0039030	CG6660	FBgn0001404	egh	FBgn0085325	CG34296	FBgn0046876	Obp83ef	FBgn0052811	CG32811			FBgn0261292	CheB53a
FBgn0026370	SRPK	FBgn0024510	dlt	FBgn0052344	CG32344	FBgn0262714	Sap130	FBgn0003117	pnr	FBgn0037686	RpL34b	FBgn0038381	CG3303					FBgn0015541	sda	FBgn0041210	HDAC4	FBgn0038750	CG4465	FBgn0003257	r-l									FBgn0030051	spirit	FBgn0039061	Ir	FBgn0024977	CG2709	FBgn0039709	Cad99C	FBgn0037402	Vha14-2	FBgn0024366	CG11409			FBgn0034132	S-Lap8
FBgn0034021	CG8180	FBgn0067864	Patj	FBgn0261985	Ptpmeg	FBgn0036314	CG10754	FBgn0024491	Bin1	FBgn0037688	CG9356	FBgn0038391	GATAe					FBgn0039467	CG14253	FBgn0052633	CG32633	FBgn0040571	CG17193	FBgn0038852	CG7056									FBgn0030080	CG15366	FBgn0039078	CG4374	FBgn0028491	CG2930	FBgn0039723	CG15522	FBgn0051559	CG31559	FBgn0027793	CG14787			FBgn0034133	CG7813
FBgn0050467	CG30467	FBgn0004636	R	FBgn0035136	CG6905	FBgn0036340	SRm160	FBgn0261286	Mat89Ba	FBgn0014023	Rlc1	FBgn0038402	Fer2					FBgn0039469	TwdlC	FBgn0030505	NFAT	FBgn0038774	CG5023	FBgn0038858	CG5793									FBgn0030097	CG12115	FBgn0028691	Rpn9	FBgn0026084	cib	FBgn0010113	hdc	FBgn0037406	Osi1	FBgn0029587	CG14797			FBgn0259795	loopin-1
FBgn0034032	CG8195	FBgn0042712	HBS1	FBgn0035137	CG1233	FBgn0082967	snoRNA:Psi28S-3327a	FBgn0040284	SF2	FBgn0027950	MBD-like	FBgn0027095	Manf					FBgn0039500	CG5984	FBgn0030537	CG12480	FBgn0262869	mun	FBgn0038869	CG3353									FBgn0030102	CG12119	FBgn0028684	Tbp-1	FBgn0029710	CG3568	FBgn0085329	CG34300	FBgn0037409	Osi24	FBgn0024897	b6			FBgn0034137	CG4945
FBgn0013762	Cdk5	FBgn0035294	Mfap1	FBgn0035141	Cypl	FBgn0082966	snoRNA:Psi28S-3327b	FBgn0027095	Manf	FBgn0037718	P58IPK	FBgn0038421	CG17931					FBgn0039507	mrt	FBgn0260482	CG32599	FBgn0024944	Oamb	FBgn0038871	CG3337									FBgn0259741	CG42395	FBgn0039111	Plip	FBgn0011277	HLH4C	FBgn0082582	tmod	FBgn0037411	Osi3	FBgn0025628	CG4199			FBgn0034144	CG5089
FBgn0053139	Ranbp11	FBgn0002872	mu2	FBgn0035145	MED14	FBgn0010452	trn	FBgn0003513	ss	FBgn0005585	Crc	FBgn0038432	CG14883					FBgn0039509	bigmax	FBgn0002917	na	FBgn0053094	Synd	FBgn0038878	CG3301									FBgn0030183	CG15309	FBgn0053111	CG33111	FBgn0004368	Ptp4E	FBgn0051013	CG31013	FBgn0037412	Osi4	FBgn0040900	CG17777			FBgn0085486	CG34457
FBgn0034046	tun	FBgn0026570	CG5704	FBgn0035148	CG3402	FBgn0036354	Poc1	FBgn0003944	Ubx	FBgn0037728	CG16817	FBgn0259244	CG42342					FBgn0260487	CG42534	FBgn0053178	CG33178	FBgn0038832	CG15695	FBgn0038893	CG6353									FBgn0040941	CG15308	FBgn0047114	CG31142	FBgn0261803	CG42749	FBgn0039808	CG12071	FBgn0037413	Osi5	FBgn0023550	CG18031			FBgn0262564	CG43104
FBgn0050085	CG30085	FBgn0035315	CG8960	FBgn0035149	MED30	FBgn0002573	sens	FBgn0000014	abd-A	FBgn0069242	eca	FBgn0038452	CG14905					FBgn0016061	side	FBgn0030611	CG15027	FBgn0038839	CG10830	FBgn0038901	burs									FBgn0003204	ras	FBgn0015282	Pros26.4	FBgn0029766	CG15784	FBgn0039811	CG15550	FBgn0037414	Osi7	FBgn0053548	msta			FBgn0259967	Sfp53D
FBgn0015247	Iap2	FBgn0035318	CG9018	FBgn0035150	Rev1	FBgn0086785	Vps36	FBgn0262906		FBgn0037739	CG12948	FBgn0262742	Fas1					FBgn0039530	Tusp	FBgn0030613	rab3-GEF	FBgn0051191	CG31191	FBgn0027575	GABA-B-R2									FBgn0052672	Atg8a	FBgn0039130	CG5854	FBgn0029770	CG4151	FBgn0261395	Prosalpha3T	FBgn0037415	Osi8	FBgn0053218	CR33218			FBgn0034152	Acp53C14a
FBgn0034057	CG8314	FBgn0015360	oxt	FBgn0035152	CG3386	FBgn0005592	btl	FBgn0051270		FBgn0261599	RpS29	FBgn0003944	Ubx					FBgn0085323	CG34294	FBgn0030618		FBgn0038845	CG10827	FBgn0038903	RpI12									FBgn0040850	CG15210	FBgn0039135	CG13603	FBgn0053980		FBgn0039821	CG15556	FBgn0037416	Osi9	FBgn0040377	Vha36-3			FBgn0034153	Acp53C14b
FBgn0034058	Pex11	FBgn0035323	CG13807	FBgn0035158	CG13895	FBgn0036411	Sox21a	FBgn0000015	Abd-B	FBgn0051514	CR31514	FBgn0000014	abd-A					FBgn0051058	CG31058	FBgn0261703	gce	FBgn0000083	AnnIX	FBgn0038923	mRpL35									FBgn0030237	CG15209	FBgn0015795	Rab7	FBgn0052758	CG32758	FBgn0040629	CG18673	FBgn0037418	Osi11	FBgn0011566	Bzd			FBgn0015584	Acp53Ea
FBgn0034060	CG8370	FBgn0035336	CG9004	FBgn0035162	CG13900	FBgn0000411	D	FBgn0038462	CG17556	FBgn0037780	CG3925	FBgn0000015	Abd-B					FBgn0039536	CG18437	FBgn0030641	CG6299	FBgn0038866	CG5810	FBgn0038924	CG6028									FBgn0028686	Rpt3	FBgn0020647	KrT95D	FBgn0029823	CG3011	FBgn0039862	kek6	FBgn0037419	Osi12	FBgn0029642	CG3592			FBgn0053530	Acp53C14c
FBgn0010590	Prosbeta1	FBgn0010905	Spn	FBgn0004378	Klp61F	FBgn0036414	nan	FBgn0038472	CG3995	FBgn0037816	CG6345	FBgn0038465	Irc					FBgn0085382	CG34353	FBgn0030668	CG8128	FBgn0038873	CG5892	FBgn0038929	CG13408									FBgn0085377	CG34348	FBgn0039161	CG13606	FBgn0027546	CG4766	FBgn0250755	CG42233	FBgn0037422	Osi13	FBgn0029660	CG10801			FBgn0259738	CG42392
FBgn0034068	casp	FBgn0028504	CG12182	FBgn0052318	CG32318	FBgn0003459	stwl	FBgn0020493	Dad	FBgn0051390	MED7	FBgn0038474	mRpS11					FBgn0039564	CG5527	FBgn0030706	CG8909	FBgn0013984	InR	FBgn0038942	CG13862									FBgn0001145	Gs2	FBgn0019952	Orct	FBgn0250869	CG42240	FBgn0011224	heph	FBgn0037427	Osi17	FBgn0029662	CG12206			FBgn0085218	CG34189
FBgn0034071	CG8405	FBgn0035357	MEP-1	FBgn0035194	Psf1	FBgn0040318	HGTX	FBgn0038473	ns1	FBgn0260944	Rbp1	FBgn0038494	beat-IIb					FBgn0085391	CG34362	FBgn0003920	snRNA:U2:14B	FBgn0051233	CG31233	FBgn0038945	CG5386									FBgn0030300	Sk1	FBgn0039189	CG18528	FBgn0053669	CG33669	FBgn0039887	CG2053	FBgn0037433	CG17919	FBgn0029663	CG10804			FBgn0034154	CG5267
FBgn0034073	CG8414	FBgn0250911	CG42245	FBgn0035205	CG2469	FBgn0041604	dlp	FBgn0259784		FBgn0037848	Tsp86D	FBgn0038536	CG7655					FBgn0085383	CG34354	FBgn0030737	CG9914	FBgn0051198	CG31198	FBgn0038964	Nop56									FBgn0262849	CR43213	FBgn0039213	atl	FBgn0053667	CG33667	FBgn0002645	Map205	FBgn0053202	dpr11	FBgn0029664	CG10802			FBgn0010213	Sod2
FBgn0017549	Ric	FBgn0027082	Aats-pro	FBgn0035210	msd5	FBgn0013263	Trl	FBgn0038522		FBgn0037874	Tctp	FBgn0038545	CG7713					FBgn0085466	CG34437	FBgn0030746	CG9981	FBgn0038901	burs	FBgn0038972	CG7054									FBgn0030326	CG2444	FBgn0004885	tok	FBgn0053666	CG33666	FBgn0085432	pan	FBgn0037456	CG1138	FBgn0044046	Ilp7			FBgn0085489	CG34460
FBgn0086676	spin	FBgn0259199	CG42303	FBgn0035213	CG2199	FBgn0029148	NHP2	FBgn0038524	sll	FBgn0037875	CG6672	FBgn0261649	tinc					FBgn0039584	beat-VI	FBgn0030747	CG4301	FBgn0027575	GABA-B-R2	FBgn0038973	Pebp1									FBgn0030329	prtp	FBgn0086059	snoRNA:Me18S-C1280	FBgn0014031	Spat	FBgn0052006	CG32006	FBgn0037460	sowi	FBgn0029690	CG6414			FBgn0025827	CG6421
FBgn0027091	Aats-cys	FBgn0035370	CG1240	FBgn0029514	CG9166	FBgn0040809	CG13465	FBgn0038536	CG7655	FBgn0065064	snoRNA:Psi28S-291	FBgn0259934						FBgn0051051	CG31051	FBgn0030748	Traf-like	FBgn0038919	CG17843	FBgn0038980	oa2									FBgn0030334	Karl	FBgn0039223	CG5805	FBgn0029878	Pat1	FBgn0262636	Lin29	FBgn0037461	CG15177	FBgn0029717	CG12684			FBgn0034165	CG6435
FBgn0034081	CG10731	FBgn0035383	CG2107	FBgn0028577	pUf68	FBgn0040487	BobA	FBgn0038540	CG14321	FBgn0037899	RpL24-like	FBgn0010389	htl					FBgn0003137	Ppn	FBgn0030752	CG9947	FBgn0038929	CG13408	FBgn0038996										FBgn0030357	Sclp	FBgn0039241	CG11089	FBgn0003390	shf	FBgn0039916	CG9935	FBgn0051286	CG31286	FBgn0029719	CG15473			FBgn0004784	inaC
FBgn0034084	CG8435	FBgn0035393	CG16753	FBgn0013753	Bgb	FBgn0026320	Tom	FBgn0038542	TyrR	FBgn0037937	Fer3	FBgn0003499	sr					FBgn0039594	CG9990	FBgn0260993		FBgn0038942	CG13862	FBgn0261572	CG42686									FBgn0020513	ade5	FBgn0039254	Nmnat	FBgn0029913	Cht11	FBgn0039920	CG11360	FBgn0037466	CG1965	FBgn0010014	CanB			FBgn0034173	CG9010
FBgn0015754	Lis-1	FBgn0035397	CG11486	FBgn0035249	CG17249	FBgn0000216	Brd	FBgn0038545	CG7713	FBgn0037940	CG14720	FBgn0038579	CG14313					FBgn0039596	CG10000	FBgn0030774	spheroide	FBgn0085317	CG34288	FBgn0051052										FBgn0030443	CG12715	FBgn0039257	tnc	FBgn0029914	CG4558	FBgn0039938	Sox102F	FBgn0262149	CR42875	FBgn0029761	SK			FBgn0050461	CG30461
FBgn0262166	calypso	FBgn0035405	pfk	FBgn0035253	CG7971	FBgn0040296	Ocho	FBgn0022943	Cbp20	FBgn0086910	l(3)neo38	FBgn0011701	repo					FBgn0024273	WASp	FBgn0030775	CG9673	FBgn0038972	CG7054	FBgn0262841										FBgn0030494	Cpr12A	FBgn0085378	CG34349	FBgn0029928	CG3032	FBgn0025726	unc-13	FBgn0250732	gfzf	FBgn0259994	CG42492			FBgn0050462	ste24c
FBgn0015295	shark	FBgn0035414	CG14965	FBgn0035254	CG7974	FBgn0036459	CG3349	FBgn0038582	CG7988	FBgn0037956	CG6959	FBgn0038592	CG18599					FBgn0039617	CG14521	FBgn0024941	RSG7	FBgn0038980	oa2	FBgn0039042	CG13837									FBgn0052627	NnaD	FBgn0004897	fd96Ca	FBgn0262968	CR43279	FBgn0263093	CR43361	FBgn0002306	sas	FBgn0259926	CG42449			FBgn0034175	ste24b
FBgn0034098	krimp	FBgn0035420	CG14967	FBgn0035267	CG13921	FBgn0025776	ind	FBgn0038585	CG7993	FBgn0260742	CG12213	FBgn0038596	CG14312					FBgn0003093	Pkc98E	FBgn0027556	CG4928	FBgn0038986	CG5278	FBgn0002622	RpS3									FBgn0030521	CtsB1	FBgn0039312	CG10514	FBgn0029955	CG15478	FBgn0019650	toy	FBgn0037483	CG14609	FBgn0029799	CG15772			FBgn0263033	CG43328
FBgn0025519	fidipidine	FBgn0035416	gry	FBgn0035271	CG2021	FBgn0036476	CG6945	FBgn0053520		FBgn0037978	KLHL18	FBgn0038603	PKD					FBgn0039647	CG14509	FBgn0030810	CG9059	FBgn0039024	CG4721	FBgn0039081	Irk2									FBgn0052626	CG32626	FBgn0039313	CG11892	FBgn0027280	l(1)G0193	FBgn0024913	Actbeta	FBgn0001112	Gld	FBgn0029814	CG15765			FBgn0263114	CG43371
FBgn0015925	csul	FBgn0035421	CG12034	FBgn0024510	dlt	FBgn0262707	CTPsyn	FBgn0038597	CG8064	FBgn0037998	CG4848	FBgn0051235	CG31235					FBgn0039673	CG7568	FBgn0030816	CG16700	FBgn0262841		FBgn0039094	CG10184									FBgn0000173	ben	FBgn0051102	CG31102	FBgn0025800	Smox	FBgn0058469	CR40469	FBgn0051501	nxf4	FBgn0029836	CG5928			FBgn0000079	Amy-p
FBgn0001308	Khc	FBgn0086069	snoRNA:Me28S-C3351	FBgn0067864	Patj	FBgn0036480	Cep135	FBgn0038601	CG18600	FBgn0038039	CG5196	FBgn0038610	CG7675					FBgn0015129	DopR2	FBgn0030824	CG5070	FBgn0039042	CG13837	FBgn0043005	prt									FBgn0030542	CG12481	FBgn0051370	CG31370	FBgn0030028	Corp	FBgn0029523	CR18275	FBgn0262982	CG43290	FBgn0029837	Tsp5D			FBgn0034195	Spn53F
FBgn0050096	CG30096	FBgn0027616	YT521-B	FBgn0004636	R	FBgn0036487	Prp31	FBgn0026239	gukh	FBgn0038055	trus	FBgn0038638	CG7702					FBgn0051036	CG31036	FBgn0052564	CG32564	FBgn0039045	CG17119	FBgn0001098	Gdh									FBgn0030545	CG11590	FBgn0051436	CG31436	FBgn0030073	CG10962	FBgn0029526	CR18166	FBgn0015569	alpha-Est10	FBgn0029863	CG3823			FBgn0034196	CG15605
FBgn0034114	CG4282	FBgn0035462	IntS10	FBgn0042712	HBS1	FBgn0029114	Tollo	FBgn0259704	CG42358	FBgn0038056	CG5961	FBgn0038660	CG14291					FBgn0004622	Takr99D	FBgn0003057	CG10598	FBgn0039051	CG17109	FBgn0051140	CG31140									FBgn0040153	l(1)G0469	FBgn0045761	CHKov1	FBgn0030079	CG7267	FBgn0000108	Appl	FBgn0015574	alpha-Est6	FBgn0261955	kdn			FBgn0083936	Acp54A1
FBgn0034118	Nup62	FBgn0035464	CG12006	FBgn0002183	dre4	FBgn0036494	Toll-6	FBgn0038704	CG5316	FBgn0260444	CG18616	FBgn0026239	gukh					FBgn0015542	sima	FBgn0030832	CG10597	FBgn0039069	CG6763	FBgn0051451	CR31451									FBgn0030586	CG12539	FBgn0039328	CHKov2	FBgn0030114	CG17754	FBgn0016038	mod(r)	FBgn0015831	Rtnl2	FBgn0053666	CG33666			FBgn0034198	CG11400
FBgn0034141	CG8311	FBgn0035469	CG14977	FBgn0000109	Aprt	FBgn0036500	CG7275	FBgn0014135	bnl	FBgn0038071	CG6234	FBgn0014006	Pk92B					FBgn0051030	CG31030	FBgn0024238	Fim	FBgn0039081	Irk2	FBgn0039159	mRpS24									FBgn0030595	CG14406	FBgn0053494	CG33494	FBgn0002576	lz	FBgn0020381	Dredd	FBgn0037521	CG2993	FBgn0029881	pigs			FBgn0034202	CG17287
FBgn0025830	IntS8	FBgn0035482	CG14985	FBgn0262624	Tmhs	FBgn0036503	CG13454	FBgn0021776	mira	FBgn0044511	mRpS21	FBgn0038755	Hs6st					FBgn0039756	CG9743	FBgn0030882	GS	FBgn0039085	CG10170	FBgn0039175	CG5706									FBgn0030597	Eo	FBgn0027865	Tsp96F	FBgn0030158	CG9686	FBgn0040383	CG5254	FBgn0037525	CG17816	FBgn0259204	CG42308			FBgn0034205	CG10950
FBgn0025832	Fen1	FBgn0035489		FBgn0035294	Mfap1	FBgn0261109	mrn	FBgn0038765	CG4424	FBgn0038149	CG9796	FBgn0083039	snoRNA:Psi18S-301					FBgn0039807	CG15546	FBgn0052495	CG32495	FBgn0039086	CG16732	FBgn0011581	Dms									FBgn0027601	pdgy	FBgn0039402	vps2	FBgn0263132	Cht6	FBgn0027343	fz3	FBgn0260005	wtrw	FBgn0029930	CG12541			FBgn0262882	CG43237
FBgn0026533	Dek	FBgn0000449	dib	FBgn0002872	mu2	FBgn0036522	CG7372	FBgn0262582	cic	FBgn0053977	CG33977	FBgn0038808	Srp14					FBgn0039808	CG12071	FBgn0030897	Frq1	FBgn0039087	CG10168	FBgn0000036	nAcRalpha-96Aa									FBgn0000535	eag	FBgn0051324	CG31324	FBgn0030183	CG15309	FBgn0040344	CG3711	FBgn0040524	CG11052	FBgn0029942	CG2059			FBgn0034206	CG18469
FBgn0085444	mute	FBgn0028484	Ack	FBgn0035295	Cnb	FBgn0041160	comm2	FBgn0014029	2013-09-02	FBgn0038150	yellow-e3	FBgn0038814	CG15923					FBgn0015032	Cyp4c3	FBgn0030913	CG6123	FBgn0039092	CG16723	FBgn0000039	nAcRalpha-96Ab									FBgn0040285	Scamp	FBgn0039419	CG12290	FBgn0040942	CG12643	FBgn0003638	su(w[a])	FBgn0037541	CG2747	FBgn0262827	CG43198			FBgn0046294	CG12699
FBgn0015562	veg	FBgn0035500		FBgn0035315	CG8960	FBgn0010105	comm	FBgn0038811	CG4159	FBgn0038151	yellow-e2	FBgn0028422	KaiRIA					FBgn0020912	Ptx1	FBgn0014467	CrebB-17A	FBgn0043005	prt	FBgn0262389	mir-1017									FBgn0030693	CG8974	FBgn0261833	CG42765	FBgn0030192		FBgn0040351	CG11638	FBgn0010812	unc-45	FBgn0052720	CG32720			FBgn0262961	CG43272
FBgn0034176	ste24a	FBgn0028664	VhaM9.7-c	FBgn0035318	CG9018	FBgn0015025	CkIIalpha-i1	FBgn0015279	Pi3K92E	FBgn0038156	CG14372	FBgn0051195	CG31195					FBgn0004573	5-HT7	FBgn0052547	CG32547	FBgn0039107	CG10300	FBgn0051126	CG31126									FBgn0030694	CG15602	FBgn0051072	Lerp	FBgn0030193		FBgn0259108	futsch	FBgn0262362	CG43060	FBgn0085367	CG34338			FBgn0262568	CG43108
FBgn0026402	NiPp1	FBgn0011692	pav	FBgn0035323	CG13807	FBgn0052150	CG32150	FBgn0051195	CG31195	FBgn0038170	CG14367	FBgn0038829	CG17271					FBgn0010015	CanA1	FBgn0259231	CCKLR-17D1	FBgn0039118	CG10208	FBgn0039219	CG13630									FBgn0030695	PGRP-LE	FBgn0039465	Tsp97E	FBgn0052679	CG32679	FBgn0001189	hfw	FBgn0037546	CG7918	FBgn0029974	dpr14			FBgn0034218	CG18467
FBgn0034181	CG8963	FBgn0041171	ago	FBgn0035336	CG9004	FBgn0036548		FBgn0019936	RpS20	FBgn0013998	Nsf2	FBgn0038830	CG17272					FBgn0039818	CG11318	FBgn0030960	CG7053	FBgn0051140	CG31140	FBgn0015591	Ast									FBgn0030703	MSBP	FBgn0041224	Gr97a	FBgn0052673	Rab9E	FBgn0023531	CG32809	FBgn0262995	CR43303	FBgn0030009	CG15336			FBgn0034229	CG4847
FBgn0023172	RhoGEF2	FBgn0035520	CG11586	FBgn0035337	CG15877	FBgn0000212	brm	FBgn0010770	ppan	FBgn0008646	E5	FBgn0083055	snoRNA:Psi18S-1295					FBgn0013973	Gycbeta100B	FBgn0259927	CG42450	FBgn0051451	CR31451	FBgn0039233	CG7006									FBgn0004066	Pros28.1	FBgn0051075	CG31075	FBgn0030271	CG15202	FBgn0025625	Sik2	FBgn0037556	CG9636	FBgn0030030	CG1636			FBgn0034247	CG6484
FBgn0086350	tef	FBgn0035523	CG1311	FBgn0035347	CG33232	FBgn0044028	Notum	FBgn0038861	CG7009	FBgn0020510	Abi	FBgn0082986	snoRNA:Psi28S-2562					FBgn0051004	CG31004	FBgn0047095	pncr004:X	FBgn0013343	Syx1A	FBgn0013949	Ela									FBgn0030753	rngo	FBgn0046247	CG5938	FBgn0030274	CG1908	FBgn0025630	CG4061	FBgn0260386	mtg	FBgn0024943	PIP82			FBgn0034248	CG14483
FBgn0034186	CG8950	FBgn0035524	CG11583	FBgn0016794	dos	FBgn0260635	th	FBgn0043012	AP-2sigma	FBgn0003567	su(Hw)	FBgn0259215	Ir93a					FBgn0039833	CG15564	FBgn0031000	Muc18B	FBgn0015765	Mpk2	FBgn0260229	CG42503									FBgn0030756	CG9903	FBgn0004387	Klp98A	FBgn0261277	rtv	FBgn0023550	CG18031	FBgn0037570	CG11693	FBgn0030066	CG1885			FBgn0034251	CG11423
FBgn0034187	CG6967	FBgn0261952	srw	FBgn0028504	CG12182	FBgn0036565	CG5235	FBgn0261839	pre-mod(mdg4)-Y	FBgn0004629	Cys	FBgn0038852	CG7056					FBgn0039858	CycG	FBgn0031004	CG7992	FBgn0000039	nAcRalpha-96Ab	FBgn0039305	CG11858									FBgn0052573	CG32573	FBgn0039532	Mtl	FBgn0030310	PGRP-SA	FBgn0044047	Ilp6	FBgn0259182		FBgn0052709				FBgn0028494	CG6424
FBgn0262567	CG43107	FBgn0015829	TfIIEbeta	FBgn0035357	MEP-1	FBgn0017453		FBgn0261840	pre-mod(mdg4)-X	FBgn0013981	His4r	FBgn0016700	Rab1					FBgn0039862	kek6	FBgn0031012	CG8051	FBgn0004118	nAcRbeta-96A	FBgn0039306	CG11859									FBgn0030769	CG13012	FBgn0086346	ALiX	FBgn0262851	CR43215	FBgn0040388	boi	FBgn0259181		FBgn0086367	t			FBgn0034263	CG10934
FBgn0034210	CG6568	FBgn0035558	CG11357	FBgn0259199	CG42303	FBgn0014163	fax	FBgn0261837	pre-mod(mdg4)-T	FBgn0038261	CG14856	FBgn0001234	Hsromega					FBgn0039883	RhoGAP100F	FBgn0065084	snmRNA:763	FBgn0039208	Esyt2	FBgn0051098	CG31098									FBgn0000152	Axs	FBgn0027579	CG5508	FBgn0262849	CR43213	FBgn0260753	Pdfr	FBgn0037613	Cks85A	FBgn0263216	CG43386			FBgn0034278	CG14488
FBgn0016697	Prosalpha5	FBgn0262733	Src64B	FBgn0035370	CG1240	FBgn0004569	aos	FBgn0004863	C15	FBgn0038307	mRpS10	FBgn0038881	CG16791					FBgn0262810	CG43181	FBgn0031033	CG14219	FBgn0039209	CG13624	FBgn0051087	CG31087									FBgn0030791	CG9132	FBgn0262587	CG43124	FBgn0030326	CG2444	FBgn0000928	fs(1)Yb	FBgn0083971	CG34135	FBgn0040940				FBgn0028741	fab1
FBgn0021818	cnk	FBgn0015805	Rpd3	FBgn0035372	CG12093	FBgn0003741	tra	FBgn0051431	CG31431	FBgn0003600		FBgn0261841	pre-mod(mdg4)-AD					FBgn0004034	y	FBgn0031034	CG14205	FBgn0015591	Ast	FBgn0039325	CG10560									FBgn0030809	CG9086	FBgn0039592	CG14062	FBgn0250871	pot	FBgn0024977	CG2709	FBgn0046874	Pif1B	FBgn0030182				FBgn0262416	mir-31a
FBgn0027506	EDTP	FBgn0035563	CG13716	FBgn0054025	CG34025	FBgn0004556	Dbp73D	FBgn0038927	CG6015	FBgn0038319	mRpL9	FBgn0261843	pre-mod(mdg4)-W					FBgn0023535	arg	FBgn0031064	CG12531	FBgn0039226	Ude	FBgn0039357	CG4743									FBgn0030816	CG16700	FBgn0053346	CG33346	FBgn0030362	regucalcin	FBgn0029656	CG10793	FBgn0262604	CG43130	FBgn0263220	Hk			FBgn0050325	CG30325
FBgn0028953	CG14478	FBgn0085295	CG34266	FBgn0035383	CG2107	FBgn0004108	Nrt	FBgn0260467	CG7071	FBgn0038320	Sra-1	FBgn0008651	lbl					FBgn0040342	CG3706	FBgn0031065	CG14234	FBgn0039232	CG13636	FBgn0039380	CG5890									FBgn0065032	Arpc3B	FBgn0039593	CG9989	FBgn0259171	Pde9	FBgn0028961	AlstR	FBgn0037645	CG11966	FBgn0030237	CG15209			FBgn0050110	CG30110
FBgn0034223	Tes	FBgn0035569	CG15876	FBgn0035401	CG1291	FBgn0261872	scaf6	FBgn0038964	Nop56	FBgn0038323	CG6196	FBgn0002941	slou					FBgn0052815	CG32815	FBgn0031069	Pmp70	FBgn0013949	Ela	FBgn0259146	CG42261									FBgn0030837	CG8661	FBgn0027578	CG14526	FBgn0030457	CG12096	FBgn0029676	HIP-R	FBgn0037662	CG11997	FBgn0030244	CG2157			FBgn0003140	PpY-55A
FBgn0022987	qkr54B	FBgn0042199	CG13713	FBgn0035407	CG14962	FBgn0036696	CG14057	FBgn0053099	CG33099	FBgn0038324	CG5038	FBgn0013984	InR					FBgn0040348	CG3703	FBgn0053517	D2R	FBgn0039266	CG11791	FBgn0002578	m1									FBgn0030876	CG6762	FBgn0259220	Doa	FBgn0030469	CG15745	FBgn0029679	CG2901	FBgn0037664	CG8420	FBgn0259241	CG42339			FBgn0034295	CG10911
FBgn0034231	Apc10	FBgn0035570	CG13712	FBgn0035414	CG14965	FBgn0015550	tap	FBgn0020278	loco	FBgn0085433	CG34404	FBgn0015229	glec					FBgn0040363	CG11384	FBgn0031116	CG1695	FBgn0085378	CG34349	FBgn0028833	Dak1									FBgn0052549	CG32549	FBgn0039632	Cul-5	FBgn0026749	Yippee	FBgn0029694	CG15375	FBgn0037665	St2	FBgn0030260	CG1537			FBgn0034323	CG18537
FBgn0034240	MESR4	FBgn0035572	CG13711	FBgn0035415	CG14966	FBgn0053052	CG33052	FBgn0039014	CG6982	FBgn0038331	CG5073	FBgn0051431	CG31431					FBgn0040359	CG11380	FBgn0052506	CG32506	FBgn0260229	CG42503	FBgn0039404	CG14543									FBgn0030927	CG15046	FBgn0039637	CG11880	FBgn0030485	CG1998	FBgn0004832	Xpac	FBgn0037675	HP1e	FBgn0030304	Cyp4g15			FBgn0034325	CG18539
FBgn0040294	POSH	FBgn0035591	CG4611	FBgn0086068	snoRNA:Or-CD12	FBgn0036733	U4-U6-60K	FBgn0039019	HP1c	FBgn0262397	mir-2c	FBgn0038926	CG13409					FBgn0028550	Atf3	FBgn0261675	Npc1b	FBgn0039282	Bili	FBgn0039407	CG14544									FBgn0030928	CG15044	FBgn0039642	CG11882	FBgn0030494	Cpr12A	FBgn0262980	CG43288	FBgn0000723	Fps85D	FBgn0030311	CG11699			FBgn0034326	CG18540
FBgn0034249	RhoGAP54D	FBgn0027914		FBgn0027616	YT521-B	FBgn0036734	CG7564	FBgn0039020	CG17141	FBgn0038358	CG4525	FBgn0017397						FBgn0024361	Tsp2A	FBgn0011834	Ser6	FBgn0039290	CG13654	FBgn0051086	CG31086									FBgn0030929	CG15043	FBgn0028692	Rpn2	FBgn0030495	CG11816	FBgn0000179	bi	FBgn0037690	Task7	FBgn0260812	inaF-D			FBgn0034327	CG14505
FBgn0029079	icln	FBgn0010747	Srp54k	FBgn0035443	CG12010	FBgn0004401	Pep	FBgn0039039	lmd	FBgn0038369	Arpc3A	FBgn0038947	sar1					FBgn0025383	CG14780	FBgn0031141	CG1304	FBgn0051106	CG31106	FBgn0039417	CG6073									FBgn0030955	CG6891	FBgn0014427	CG11899	FBgn0052631	CG32631	FBgn0029708	CG3556	FBgn0037712	CG16789	FBgn0259918	inaF-B			FBgn0034330	CG18107
FBgn0050105	CG30105	FBgn0035601	Uev1A	FBgn0035464	CG12006	FBgn0052177	Ndfip	FBgn0003118	pnt	FBgn0051292	CR31292	FBgn0260467	CG7071					FBgn0053513	Nmdar2	FBgn0052521	CG32521	FBgn0051103	CG31103	FBgn0000064	Ald									FBgn0030958	CG6900	FBgn0262873	Diedel2	FBgn0030503	Tango2	FBgn0029728	CG2861	FBgn0037717	CG8301	FBgn0085350	inaF-C			FBgn0034331	CG15067
FBgn0029006	lack	FBgn0029121	Sras	FBgn0035470	CG14980	FBgn0065088	snmRNA:641	FBgn0039098	CG13822	FBgn0038381	CG3303	FBgn0085405	CG34376					FBgn0025393	CG14795	FBgn0259245	CG42343	FBgn0039316	CG11893	FBgn0039420	CG6154									FBgn0030993	Mec2	FBgn0085325	CG34296	FBgn0030505	NFAT	FBgn0052772	CG32772	FBgn0262477	FoxP	FBgn0030348	CG10352			FBgn0025583	IM2
FBgn0004400	rhi	FBgn0040239	bc10	FBgn0041147	ida	FBgn0052182	CG32182	FBgn0039101	CG16710	FBgn0052856	CG32856	FBgn0038976	CG7048					FBgn0025391	Scgdelta	FBgn0031190	CG12576	FBgn0051098	CG31098	FBgn0085320	CG34291									FBgn0030994	CG14193	FBgn0039688	Kul	FBgn0030542	CG12481	FBgn0261803	CG42749	FBgn0037736	CG12950	FBgn0263111	cac			FBgn0040736	IM3
FBgn0034255	CG18186	FBgn0035617	l(3)psg2	FBgn0035482	CG14985	FBgn0036754	CG5589	FBgn0042106	CG18754	FBgn0038402	Fer2	FBgn0053099	CG33099					FBgn0000667	Actn	FBgn0027279	l(1)G0196	FBgn0051097	CG31097	FBgn0023178	Pdf									FBgn0031011	CG8034	FBgn0039709	Cad99C	FBgn0260482	CG32599	FBgn0029766	CG15784	FBgn0085438	CG34409	FBgn0030367	Cyp311a1			FBgn0040735	CG16836
FBgn0034261	HPS4	FBgn0003486	spo	FBgn0035488	CG11593	FBgn0036761	MED19	FBgn0002922	nau	FBgn0040071	tara	FBgn0014949	btn					FBgn0025631	moody	FBgn0016976	stnA	FBgn0039319	CG13659	FBgn0250908	beat-VII									FBgn0031037	CG14207	FBgn0039714	CG7816	FBgn0030563	betaNACtes2	FBgn0053980		FBgn0037754	CG8500	FBgn0030369	Cyp318a1			FBgn0040733	CG15068
FBgn0027872	rdgBbeta	FBgn0035622	CG10590	FBgn0000449	dib	FBgn0259791	bora	FBgn0039113	CG10217	FBgn0027095	Manf	FBgn0039014	CG6982					FBgn0025628	CG4199	FBgn0044872	FucTC	FBgn0051288	CG31288	FBgn0023179	amon									FBgn0031092	CG9577	FBgn0039747	AdoR	FBgn0022710	Ac13E	FBgn0029778	RhoGAP5A	FBgn0085331	CG34302	FBgn0052657	CR32657			FBgn0063491	GstE9
FBgn0063383	snoRNA:U29:54Ec	FBgn0035624	Eaf6	FBgn0260985	RfC4	FBgn0052202	CG32202	FBgn0039116	CG10375	FBgn0003513	ss	FBgn0039025	CG7023					FBgn0040395	Unc-76	FBgn0039941	CG17167	FBgn0039321	CG10550	FBgn0039453	CG6403									FBgn0260867	CG42577	FBgn0015221	Fer2LCH	FBgn0030653	CG7860	FBgn0029791	CG4096	FBgn0037766	Teh1	FBgn0030407	CG2543			FBgn0262476	CG43066
FBgn0034265	Snx16	FBgn0086694	Bre1	FBgn0001257	ImpL2	FBgn0036811	MED11	FBgn0015513	mbc	FBgn0038426	mRpS33	FBgn0039026	CG7029					FBgn0004397	Vinc			FBgn0039325	CG10560	FBgn0039464	CG6330									FBgn0031117	CG1702	FBgn0039788	Rpt6R	FBgn0262163	betaNACtes5	FBgn0052758	CG32758	FBgn0037772	Spn85F	FBgn0030412	tomosyn			FBgn0261587	CG42697
FBgn0085224	CG34195	FBgn0035639	CG5537	FBgn0011692	pav	FBgn0036818	CG14074	FBgn0025574	Pli	FBgn0038452	CG14905	FBgn0017590	klg					FBgn0261451	trol			FBgn0039326	CG10562	FBgn0039486	CG6074									FBgn0031143	CG1532	FBgn0039795	Spn100A	FBgn0030693	CG8974	FBgn0261610	CG42699	FBgn0053208	Mical	FBgn0052638	CG32638			FBgn0034363	CG5327
FBgn0034269	CG6406	FBgn0035640	mad2	FBgn0041171	ago	FBgn0036828	CG6841	FBgn0013347	TfIIA-S	FBgn0003944	Ubx	FBgn0039052	CG6733					FBgn0011276	HLH3B			FBgn0039332	alrm	FBgn0261995	CG42813									FBgn0031161	CG15445	FBgn0000416	Sap-r	FBgn0259700	CG42354	FBgn0262945	CR43264	FBgn0037779	CG12811	FBgn0030459	CG12723			FBgn0053136	CG33136
FBgn0034270	CG6401	FBgn0035641	CG5568	FBgn0035520	CG11586	FBgn0002945	nkd	FBgn0039136	CG5902	FBgn0038465	Irc	FBgn0039064	CG4467					FBgn0028491	CG2930			FBgn0039354	Lgr3	FBgn0040609	CG3348									FBgn0020369	Pros45	FBgn0039811	CG15550	FBgn0030749	Anxb11	FBgn0027546	CG4766	FBgn0001321	knk	FBgn0030467	CG1764			FBgn0034374	CG15086
FBgn0034271	CG4996	FBgn0052409	CG32409	FBgn0035523	CG1311	FBgn0016797	fz2	FBgn0039137	CG13604	FBgn0038494	beat-IIb	FBgn0039078	CG4374					FBgn0029690	CG6414			FBgn0039380	CG5890	FBgn0262286	mir-1001											FBgn0039818	CG11318	FBgn0030757	CG9902	FBgn0029003	mab-21	FBgn0040238	Best1	FBgn0261085	Syt12			FBgn0262102	CG42855
FBgn0003545	sub	FBgn0002638	Bj1	FBgn0035524	CG11583	FBgn0017578	Max	FBgn0040283	SMC1	FBgn0038524	sll	FBgn0039098	CG13822					FBgn0262973				FBgn0002578	m1	FBgn0039536	CG18437											FBgn0039844	CG1607	FBgn0030769	CG13012	FBgn0052745	CR32745	FBgn0037798	CG12817	FBgn0052635	Neto			FBgn0034377	CG15071
FBgn0026309	aft	FBgn0035675	CG6610	FBgn0035526	CG1316	FBgn0036856	CG9666	FBgn0086365	Orct2	FBgn0038536	CG7655	FBgn0039099	CG10157					FBgn0029692				FBgn0051323	CG31323	FBgn0085382	CG34353											FBgn0086378	Alg-2	FBgn0015336	CG15865	FBgn0029856	CG11700	FBgn0083943	CG34107	FBgn0004169	up			FBgn0062961	pncr016:2R
FBgn0026316	UbcD10	FBgn0022699	D19B	FBgn0015829	TfIIEbeta	FBgn0053062	CG33062	FBgn0259685	crb	FBgn0038545	CG7713	FBgn0002922	nau					FBgn0025613	CG3081			FBgn0039420	CG6154	FBgn0003279	RpL4											FBgn0086917	spok	FBgn0030795	ppk28	FBgn0029878	Pat1	FBgn0051406	CG31406	FBgn0030559	CG13404			FBgn0034381	List
FBgn0041585	olf186-F	FBgn0024921	Trn	FBgn0052251	CG32251	FBgn0036886	CG9300	FBgn0039182	CG5728	FBgn0010389	htl	FBgn0039113	CG10217					FBgn0029720	CG3009			FBgn0039429	CG14238	FBgn0082923	snoRNA:Or-aca3											FBgn0016126	CaMKI	FBgn0030808	RhoGAP15B	FBgn0029894	CG14440	FBgn0262717	Skeletor	FBgn0052600	dpr8			FBgn0034382	CG18609
FBgn0015522	olf186-M	FBgn0261934	dikar	FBgn0035541	CG15019	FBgn0036888	CG9330	FBgn0039183	Dis3	FBgn0011701	repo	FBgn0005674	Aats-glupro					FBgn0029723	Proc-R			FBgn0039441	TwdlN	FBgn0003890	betaTub97EF											FBgn0039924	CG17471	FBgn0030809	CG9086	FBgn0029895	CG14441	FBgn0051391	CG31391	FBgn0030595	CG14406			FBgn0034387	Cyp12b2
FBgn0003701	thr	FBgn0035713	CG10107	FBgn0035558	CG11357	FBgn0010417	Taf6	FBgn0039204	CG6607	FBgn0038592	CG18599	FBgn0039132	AP-1sigma					FBgn0260971	CG42594			FBgn0250908	beat-VII	FBgn0039584	beat-VI											FBgn0004648	svr	FBgn0260748	CG5004	FBgn0003390	shf	FBgn0037837	CG14693	FBgn0053177	CG33177			FBgn0034394	CG15096
FBgn0034299	CG5757	FBgn0035715	CG10103	FBgn0015805	Rpd3	FBgn0036896	wnd	FBgn0046685	Wsck	FBgn0038596	CG14312	FBgn0027103	sec10					FBgn0086911	rg			FBgn0023179	amon	FBgn0082976	snoRNA:Psi28S-3305a											FBgn0000210	br	FBgn0030829	CG12998	FBgn0029903	pod1	FBgn0037838	CG4089	FBgn0003392	shi			FBgn0262479	CG43069
FBgn0034300	CG5098	FBgn0035721	CG9948	FBgn0027914		FBgn0001324	kto	FBgn0039218	Rpb10	FBgn0038601	CG18600	FBgn0259685	crb					FBgn0029746	CG15465			FBgn0039454	CG14247	FBgn0082975	snoRNA:Psi28S-3305b											FBgn0029584	CG11509	FBgn0030847	CG12991	FBgn0029914	CG4558	FBgn0259740	CG42394	FBgn0030707	CG8916			FBgn0262480	CG43070
FBgn0001222	Hsf	FBgn0035726	CG9953	FBgn0029121	Sras	FBgn0262519	Mi-2	FBgn0039229	Saf-B	FBgn0038603	PKD	FBgn0053339	CG33339					FBgn0029748	CG15464			FBgn0015541	sda	FBgn0082957	snoRNA:Psi28S-3405d											FBgn0026090	CG14812	FBgn0262607	CG43133	FBgn0029928	CG3032	FBgn0037857	Tengl4	FBgn0010240	Lcch3			FBgn0086022	snoRNA:Me28S-U1130
FBgn0003044	Pcl	FBgn0001104	G-ialpha65A	FBgn0003486	spo	FBgn0036915	CG7757	FBgn0013953	Esp	FBgn0051235	CG31235	FBgn0039192	CG17784					FBgn0010014	CanB			FBgn0039464	CG6330	FBgn0039595	AR-2											FBgn0000382	csw	FBgn0262874	CG43229	FBgn0262827	CG43198	FBgn0051144	CR31144	FBgn0261834	CG42766			FBgn0028669	Vha100-3
FBgn0062440	CG17680	FBgn0259173	corn	FBgn0035622	CG10590	FBgn0036916	Mtr3	FBgn0039233	CG7006	FBgn0038610	CG7675	FBgn0039193	CG13613					FBgn0029768	SPR			FBgn0039467	CG14253	FBgn0039617	CG14521											FBgn0054052	CR34052	FBgn0053542	upd3	FBgn0262967	CG43278	FBgn0051374	sals	FBgn0030722	CG12395			FBgn0263083	CG43351
FBgn0034304	CG5742	FBgn0024542	Neos	FBgn0035624	Eaf6	FBgn0036922	CG14182	FBgn0051121	CG31121	FBgn0038619	CG7685	FBgn0261993	CG42811					FBgn0029771	CG12730			FBgn0039509	bigmax	FBgn0039627	CG11837											FBgn0040392	CG14050	FBgn0030925	CG6361	FBgn0262968	CR43279	FBgn0037910	CG14708	FBgn0030723	dpr18			FBgn0034415	CG15116
FBgn0000057	adp	FBgn0035754	MED4	FBgn0035627	Sse	FBgn0261574	kug	FBgn0039250	CG11120	FBgn0051229	CG31229	FBgn0261994	CG42812					FBgn0259150	CG42265			FBgn0085323	CG34294	FBgn0051427	CG31427											FBgn0044047	Ilp6	FBgn0030926	psh	FBgn0052719	CG32719	FBgn0037911	CG10898	FBgn0030725	CG8958			FBgn0034419	CG15111
FBgn0034308	CG10915	FBgn0011640	lark	FBgn0052418	vito	FBgn0036937	Ir76b	FBgn0039274	CG11920	FBgn0038660	CG14291	FBgn0053341	CG33341					FBgn0029820	CG16721			FBgn0039536	CG18437	FBgn0039674	CG1907											FBgn0003371	sgg	FBgn0030927	CG15046	FBgn0052718	CG32718	FBgn0051363	Jupiter	FBgn0030745	CG4239			FBgn0263290	CR43399
FBgn0034310	Nup75	FBgn0016983	smid	FBgn0086694	Bre1	FBgn0036958	CG17233	FBgn0004898	fd96Cb	FBgn0026239	gukh	FBgn0039194	CG13614					FBgn0029827	CG6048			FBgn0085382	CG34353	FBgn0015129	DopR2											FBgn0003996	w	FBgn0030955	CG6891	FBgn0003447	sn	FBgn0037923	CG6813	FBgn0030758	CanA-14F			FBgn0034435	CG9975
FBgn0034313	CG5726	FBgn0035793	CG7546	FBgn0035640	mad2	FBgn0036964	CG6480	FBgn0039300	RpS27	FBgn0027784	Prp18	FBgn0039195	CG17782					FBgn0029834	CG5937			FBgn0003890	betaTub97EF	FBgn0013972	Gycalpha99B											FBgn0040396	CG3939	FBgn0030958	CG6900	FBgn0025800	Smox	FBgn0025821	I-t	FBgn0030763	CG9782			FBgn0261439	SdhA
FBgn0034314	nopo	FBgn0053276	CG33276	FBgn0003984	vn	FBgn0003124	polo	FBgn0039303	CG11857	FBgn0259704	CG42358	FBgn0039196	CG17781					FBgn0029849	Efr			FBgn0085466	CG34437	FBgn0039713	RpS8											FBgn0026084	cib	FBgn0030993	Mec2	FBgn0030028	Corp	FBgn0037941	CG12594	FBgn0030798	CG13003			FBgn0262571	CG43111
FBgn0003022	Ote	FBgn0052373	CG32373	FBgn0035644	Pole2	FBgn0036973	Rbbp5	FBgn0039306	CG11859	FBgn0010768	sqz	FBgn0039197	CG17780					FBgn0029863	CG3823			FBgn0039584	beat-VI	FBgn0039718	CG15517											FBgn0029710	CG3568	FBgn0030994	CG14193	FBgn0030058	CG11294	FBgn0262364	CG43062	FBgn0030810	CG9059			FBgn0262170	CG42878
FBgn0010575	sbb	FBgn0003041	pbl	FBgn0052409	CG32409	FBgn0024887	kin17	FBgn0039350	jigr1	FBgn0038737	CG11447	FBgn0039198	CG5768					FBgn0029864	CG15894			FBgn0039595	AR-2	FBgn0003358	Jon99Ci											FBgn0052762	CG32762	FBgn0031053	CG14223	FBgn0030073	CG10962	FBgn0037949	CG17360	FBgn0052563	CG32563			FBgn0034459	CG16716
FBgn0034322	CG18536	FBgn0010406	RNaseX25	FBgn0002638	Bj1	FBgn0259676	DNApol-alpha60	FBgn0039356	CG5039	FBgn0014006	Pk92B	FBgn0039199	CG13615					FBgn0259242	CG42340			FBgn0039596	CG10000	FBgn0004622	Takr99D											FBgn0029770	CG4151	FBgn0031055	et	FBgn0030114	CG17754	FBgn0037964	CG14731	FBgn0030826	CG12995			FBgn0261807	CG42753
FBgn0063492	GstE8	FBgn0035829	HP4	FBgn0035656	CG10479	FBgn0028978	trbl	FBgn0039359	RpL27	FBgn0038805	TFAM	FBgn0039200	CG13616					FBgn0029881	pigs			FBgn0039609	CG14529	FBgn0039736	CG7912											FBgn0004687	Mlc-c	FBgn0260871	CG42581	FBgn0030116	CR17438	FBgn0051211	CG31211	FBgn0085356	CG34327			FBgn0262966	CG43277
FBgn0034360	CG10927	FBgn0011817	nmo	FBgn0035674	CG13295	FBgn0036987	CG5274	FBgn0039381	Sppl	FBgn0038806	CG5412	FBgn0039202	CG13622					FBgn0029898	CG14439			FBgn0039611	CG14528	FBgn0002626	RpL32											FBgn0029783	Sirt4	FBgn0085360	CG34331	FBgn0002576	lz	FBgn0037972	CG10005	FBgn0040877	CG12994			FBgn0034461	CG15124
FBgn0034367	sec6	FBgn0027549	CG7927	FBgn0035675	CG6610	FBgn0019947	Psn	FBgn0262576	CG43116	FBgn0038808	Srp14	FBgn0004190	snRNA:U6:96Ac					FBgn0086693	iav			FBgn0039617	CG14521	FBgn0260468	CG7950											FBgn0015794	Rab-RP4	FBgn0085361	CG34332	FBgn0259741	CG42395	FBgn0260745	mfas	FBgn0030841	CG8568			FBgn0034463	CG15125
FBgn0034371	SP2637	FBgn0262716	Arp66B	FBgn0035688	CG10289	FBgn0052428	CG32428	FBgn0002734	HLHmdelta	FBgn0014029	2013-09-02	FBgn0039209	CG13624					FBgn0027106	inx7			FBgn0039645	CG11898	FBgn0039748	CG15529											FBgn0003747	Gr5a	FBgn0031097	obst-A	FBgn0020378	Sp1	FBgn0037992	CG4702	FBgn0030844	ppk23			FBgn0034464	CG11018
FBgn0262103	Sik3	FBgn0035838	ldbr	FBgn0035689	CG7376	FBgn0001323	knrl	FBgn0002735	HLHmgamma	FBgn0038810	Srp72	FBgn0046685	Wsck					FBgn0029950	CG9657			FBgn0015129	DopR2	FBgn0039757	RpS7											FBgn0052758	CG32758	FBgn0031099	CG17065	FBgn0052698	CG32698	FBgn0037993	dpr15	FBgn0263258	chas			FBgn0028372	isopeptidase-T-3
FBgn0034380	CG15087	FBgn0029113	Uba2	FBgn0020251	sfl	FBgn0001320	kni	FBgn0002733	HLHmbeta	FBgn0038811	CG4159	FBgn0040600	CG13631					FBgn0029962	CG1402			FBgn0039719	CG15515	FBgn0082983	snoRNA:Psi28S-2626											FBgn0029801	CG15771	FBgn0031104	CG15460	FBgn0030158	CG9686	FBgn0010039	GstD3	FBgn0003380	Sh			FBgn0034467	CG15128
FBgn0259682	CG42351	FBgn0259916	CG42445	FBgn0261934	dikar	FBgn0027364	Six4	FBgn0002732	malpha	FBgn0051195	CG31195	FBgn0051118	RabX4					FBgn0010329	Tbh			FBgn0004622	Takr99D	FBgn0086664	snoRNA:Psi28S-2149											FBgn0262945	CR43264	FBgn0052507	CG32507	FBgn0040940		FBgn0010040	GstD4	FBgn0030895	CG7135			FBgn0034471	Obp56e
FBgn0034389	Mctp	FBgn0035848	CG7979	FBgn0035715	CG10103	FBgn0037025	Spc105R	FBgn0002592	m2	FBgn0038829	CG17271	FBgn0262962	CG43273					FBgn0004657	mys			FBgn0051031	CG31031	FBgn0083047	snoRNA:Psi18S-1377e											FBgn0029820	CG16721	FBgn0031146	CG15449	FBgn0030182		FBgn0010041	GstD5	FBgn0004028	wupA			FBgn0043533	Obp56f
FBgn0034401	CG15100	FBgn0035850	Atg18	FBgn0035725	Mis12	FBgn0037026	CG3634	FBgn0002609	HLHm3	FBgn0019936	RpS20	FBgn0051121	CG31121					FBgn0029995	CG2256			FBgn0039759	CG9733	FBgn0039768	CG15533											FBgn0000042	Act5C	FBgn0031161	CG15445	FBgn0040942	CG12643	FBgn0010042	GstD6	FBgn0083228	Frq2			FBgn0034472	CG8517
FBgn0034402	CG15084	FBgn0035851	MED24	FBgn0035726	CG9953	FBgn0037027	CG3680	FBgn0002633	HLHm7	FBgn0082986	snoRNA:Psi28S-2562	FBgn0039244	CG11069					FBgn0030005	CG2120			FBgn0039789	CG9717	FBgn0039770	CG15537											FBgn0029823	CG3011	FBgn0083956	CG34120	FBgn0030208	PPP4R2r	FBgn0038052	CG5538	FBgn0053639	CG33639			FBgn0034474	Obp56g
FBgn0034403	CG18190	FBgn0035853	Ubc12	FBgn0001104	G-ialpha65A	FBgn0028402	Sin	FBgn0000591	E(spl)	FBgn0038834	RpS30	FBgn0039260	Smg6					FBgn0030011	Gbeta5			FBgn0015032	Cyp4c3	FBgn0039777	Jon99Fii											FBgn0029824	CG3726	FBgn0052499	Cda4	FBgn0052673	Rab9E	FBgn0038054	CG5509	FBgn0259223	CG42323			FBgn0043532	Obp56i
[truncated: 2,327 more rows]
[truncated: 10 more columns]

## Sheet: fly tissue_cell-associated gene
CarcassL3		CarcassMixedMaleFemale+1d		CarcassMixedMaleFemale+4d		CarcassMixedMaleFemale+20d		FatL3		FatPrepupae		FatPrepupae+2d		SalivaryGlandsL3		SalivaryGlandsPrepupae		DigestiveSystemL3		DigestiveSystemMixedMaleFemale+1d		DigestiveSystemMixedMaleFemale+4d		DigestiveSystemMixedMaleFemale+20d		ImaginalDiscsL3		CNSL3		CNSPrepupae+2d		HeadsVirginFemale+1d		HeadsVirginFemale+4d		HeadsVirginFemale+20d		HeadsMatedFemale+1d		HeadsMatedFemale+4d		HeadsMatedFemale+20d		HeadsMatedMale+1d		HeadsMatedMale+4d		HeadsMatedMale+20d
[truncated: 2,026 more rows]
[truncated: 46 more columns]

[truncated: 2 more sheets: worm stage-associated genes, worm tissuecell-associated gene]
