# Supplementary material for: Comparison of D. melanogaster and C. elegans developmental stages, tissues, and cells by modENCODE RNA-seq data
Source: HighWire-hosted journal article supplement (doi:10.1101/gr.170100.113), 2014-07-01
Supplement: Supplemental_Files.zip [file TableS4 associated genes with orthologs.xlsx]

## Sheet: fly stage-associated genes
Embryo0-2h		Embryo2-4h		Embryo4-6h		Embryo6-8h		Embryo8-10h		Embryo10-12h		Embryo12-14h		Embryo14-16h		Embryo16-18h		Embryo18-20h		Embryo20-22h		Embryo22-24h		L1		L2		L3+12h		L3PS1-2		L3PS3-6		L3PS7-9		Prepupae		Prepupae+12h		Prepupae+24h		Prepupae+2d		Prepupae+3d		Prepupae+4d		Male+1d
ID	Name	ID	Name	ID	Name	ID	Name	ID	Name	ID	Name	ID	Name	ID	Name	ID	Name	ID	Name	ID	Name	ID	Name	ID	Name	ID	Name	ID	Name	ID	Name	ID	Name	ID	Name	ID	Name	ID	Name	ID	Name	ID	Name	ID	Name	ID	Name	ID	Name
FBgn0020616	SA	FBgn0004106	cdc2	FBgn0020616	SA	FBgn0020616	SA	FBgn0020616	SA	FBgn0260856	membrin	FBgn0030306	Spase25	FBgn0004657	mys	FBgn0004657	mys	FBgn0004657	mys	FBgn0039380	CG5890	FBgn0039380	CG5890	FBgn0036488	CG6878	FBgn0036488	CG6878	FBgn0037973	CG18547	FBgn0040507	ACXD	FBgn0040985	CG6115	FBgn0004066	Pros28.1	FBgn0004657	mys	FBgn0019968	Khc-73	FBgn0017557	Pros28.1A	FBgn0039000	CG6954	FBgn0036488	CG6878	FBgn0261569	CG42683	FBgn0017556	Pros28.1B
FBgn0260856	membrin	FBgn0034258	eIF3-S8	FBgn0004106	cdc2	FBgn0004106	cdc2	FBgn0016131	Cdk4	FBgn0034258	eIF3-S8	FBgn0032223	GATAd	FBgn0052227	gogo	FBgn0030358	CG10362	FBgn0030358	CG10362	FBgn0030897	Frq1	FBgn0030897	Frq1	FBgn0039380	CG5890	FBgn0037973	CG18547	FBgn0005666	bt	FBgn0051343	CG31343	FBgn0037975	CG3397	FBgn0040985	CG6115	FBgn0013272	Gp150	FBgn0038897	CG5849	FBgn0036534	Dcp2	FBgn0036488	CG6878	FBgn0083228	Frq2	FBgn0036273	CG10426	FBgn0036311	CG17666
FBgn0015754	Lis-1	FBgn0039000	CG6954	FBgn0034258	eIF3-S8	FBgn0016131	Cdk4	FBgn0034258	eIF3-S8	FBgn0015754	Lis-1	FBgn0052227	gogo	FBgn0033983	CG10253	FBgn0001205		FBgn0039380	CG5890	FBgn0051233	CG31233	FBgn0058470	CG40470	FBgn0037973	CG18547	FBgn0051343	CG31343	FBgn0033541	CG12934	FBgn0033541	CG12934	FBgn0033541	CG12934	FBgn0037975	CG3397	FBgn0036484	Pex3	FBgn0027598	cindr	FBgn0041096	rols	FBgn0041096	rols	FBgn0058470	CG40470	FBgn0027493	CG17273	FBgn0040509	ACXB
FBgn0028434	Ercc1	FBgn0036124	CG7839	FBgn0030306	Spase25	FBgn0034258	eIF3-S8	FBgn0004227	nonA	FBgn0030306	Spase25	FBgn0033983	CG10253	FBgn0041096	rols	FBgn0002121	l(2)gl	FBgn0030897	Frq1	FBgn0030748	Traf-like	FBgn0051233	CG31233	FBgn0038996		FBgn0051233	CG31233	FBgn0036992	CG11796	FBgn0039086	CG16732	FBgn0040250	Ugt86Dj	FBgn0034068	casp	FBgn0037975	CG3397	FBgn0004618	gl	FBgn0040506	ACXE	FBgn0040509	ACXB	FBgn0086712	Egm	FBgn0035046	CG3683	FBgn0040510	ACXA
FBgn0036124	CG7839	FBgn0004066	Pros28.1	FBgn0015929	dpa	FBgn0039000	CG6954	FBgn0034029	eIF2B-gamma	FBgn0052227	gogo	FBgn0002121	l(2)gl	FBgn0001205		FBgn0001250	if	FBgn0001250	if	FBgn0027493	CG17273	FBgn0030961	CG7058	FBgn0027493	CG17273	FBgn0038829	CG17271	FBgn0027073	CG4302	FBgn0040250	Ugt86Dj	FBgn0040251	Ugt86Di	FBgn0036531	CG6244	FBgn0037974	CG12224	FBgn0039402	vps2	FBgn0003301	rut	FBgn0040508	ACXC	FBgn0005666	bt	FBgn0034137	CG4945	FBgn0040508	ACXC
FBgn0004066	Pros28.1	FBgn0025355	SuUR	FBgn0013272	Gp150	FBgn0015929	dpa	FBgn0032620	CG12288	FBgn0033983	CG10253	FBgn0032620	CG12288	FBgn0034520	lms	FBgn0030961	CG7058	FBgn0030961	CG7058	FBgn0002917	na	FBgn0030748	Traf-like	FBgn0259146	CG42261	FBgn0086712	Egm	FBgn0086691	UK114	FBgn0026315	Ugt35a	FBgn0025595	GRHR	FBgn0039402	vps2	FBgn0034068	casp	FBgn0039265	CG11790	FBgn0019968	Khc-73	FBgn0037717	CG8301	FBgn0035046	CG3683	FBgn0033570	CG7712	FBgn0052301	CG32301
FBgn0032223	GATAd	FBgn0029756	CG3309	FBgn0036534	Dcp2	FBgn0013272	Gp150	FBgn0025574	Pli	FBgn0041096	rols	FBgn0034520	lms	FBgn0003888	betaTub60D	FBgn0031196	CG17599	FBgn0030748	Traf-like	FBgn0051004	CG31004	FBgn0036273	CG10426	FBgn0002917	na	FBgn0033541	CG12934	FBgn0001125	Got2	FBgn0086691	UK114	FBgn0039742	CG15528	FBgn0028539	CG31731	FBgn0261243	Psa	FBgn0032297	CG17124	FBgn0025726	unc-13	FBgn0025726	unc-13	FBgn0027074	CG17324	FBgn0259680	Pkcdelta	FBgn0083228	Frq2
FBgn0025355	SuUR	FBgn0036484	Pex3	FBgn0043884	mask	FBgn0043884	mask	FBgn0017578	Max	FBgn0034029	eIF2B-gamma	FBgn0003888	betaTub60D	FBgn0030961	CG7058	FBgn0032297	CG17124	FBgn0015806	S6k	FBgn0051323	CG31323	FBgn0036697	rogdi	FBgn0086712	Egm	FBgn0040253	Ugt86Dg	FBgn0038038	CG5167	FBgn0025595	GRHR	FBgn0038009	CG17738	FBgn0033541	CG12934	FBgn0039402	vps2	FBgn0031855	CG11221	FBgn0004618	gl	FBgn0003888	betaTub60D	FBgn0261794	kcc	FBgn0033935	Sin1	FBgn0015623	Cpr
FBgn0015929	dpa	FBgn0043884	mask	FBgn0041627	Ku80	FBgn0004227	nonA	FBgn0037737	Pnn	FBgn0032620	CG12288	FBgn0017578	Max	FBgn0031255	BBS8	FBgn0002917	na	FBgn0259146	CG42261	FBgn0040252	Ugt86Dh	FBgn0005666	bt	FBgn0030672	CG9281	FBgn0027073	CG4302	FBgn0038528	CG14326	FBgn0038038	CG5167	FBgn0001961	Sop2	FBgn0040475	SH3PX1	FBgn0028539	CG31731	FBgn0032713	CG17323	FBgn0033578	BBS4	FBgn0058470	CG40470	FBgn0001991	Ca-alpha1D	FBgn0259243	Pka-R1	FBgn0052026	CG32026
FBgn0033890	Ctf4	FBgn0034496	CG9143	FBgn0002121	l(2)gl	FBgn0032620	CG12288	FBgn0026319	Traf4	FBgn0025574	Pli	FBgn0037737	Pnn	FBgn0033578	BBS4	FBgn0004380	Klp64D	FBgn0031196	CG17599	FBgn0040250	Ugt86Dj	FBgn0051004	CG31004	FBgn0036992	CG11796	FBgn0038886	CG6475	FBgn0032820	fbp	FBgn0038009	CG17738	FBgn0030521	CtsB1	FBgn0040251	Ugt86Di	FBgn0040475	SH3PX1	FBgn0032689	CG10413	FBgn0039265	CG11790	FBgn0037798	CG12817	FBgn0038474	mRpS11	FBgn0039742	CG15528	FBgn0052396	CG32396
FBgn0029756	CG3309	FBgn0037717	CG8301	FBgn0004227	nonA	FBgn0030057	Ppt1	FBgn0085403	Rapgap1	FBgn0034520	lms	FBgn0038829	CG17271	FBgn0031196	CG17599	FBgn0051004	CG31004	FBgn0002917	na	FBgn0040253	Ugt86Dg	FBgn0051323	CG31323	FBgn0027073	CG4302	FBgn0038038	CG5167	FBgn0038463	CG3534	FBgn0001961	Sop2	FBgn0032727	CG10623	FBgn0032684	CG10178	FBgn0040251	Ugt86Di	FBgn0039140	Miro	FBgn0051121	CG31121	FBgn0033578	BBS4	FBgn0037380		FBgn0020368	Vha68-1	FBgn0003889	betaTub85D
FBgn0036484	Pex3	FBgn0002121	l(2)gl	FBgn0030057	Ppt1	FBgn0030855	CG5800	FBgn0036254	CG5645	FBgn0038331	CG5073	FBgn0063670	CG40228	FBgn0040091	Ugt58Fa	FBgn0051323	CG31323	FBgn0051004	CG31004	FBgn0040255	Ugt86De	FBgn0039085	CG10170	FBgn0261794	kcc	FBgn0038474	mRpS11	FBgn0035298	CG1140	FBgn0031263	CG2789	FBgn0037730	CG9444	FBgn0032713	CG17323	FBgn0032684	CG10178	FBgn0036988	CG5262	FBgn0051213	CG31213	FBgn0039265	CG11790	FBgn0040900	CG17777	FBgn0037847	SelR	FBgn0036170	CG11714
FBgn0043884	mask	FBgn0015520	nonA-l	FBgn0062440	CG17680	FBgn0038331	CG5073	FBgn0034748	CG17807	FBgn0003888	betaTub60D	FBgn0036531	CG6244	FBgn0052677	X11Lbeta	FBgn0039085	CG10170	FBgn0051323	CG31323	FBgn0040256	Ugt86Dd	FBgn0039086	CG16732	FBgn0001125	Got2	FBgn0051126	CG31126	FBgn0262512	Vha14-1	FBgn0039760	CG9682	FBgn0039760	CG9682	FBgn0015663	Dot	FBgn0032713	CG17323	FBgn0005660	Ets21C	FBgn0031169	CG1494	FBgn0051213	CG31213	FBgn0032261	CG6094	FBgn0034218	CG18467	FBgn0261998	CG42816
FBgn0034496	CG9143	FBgn0040347	mus81	FBgn0019968	Khc-73	FBgn0041186	Slbp	FBgn0051121	CG31121	FBgn0038829	CG17271	FBgn0031255	BBS8	FBgn0028331	l(1)G0289	FBgn0039087	CG10168	FBgn0259680	Pkcdelta	FBgn0040259	Ugt86Da	FBgn0039087	CG10168	FBgn0262511	Vha44	FBgn0250874	ttm50	FBgn0033465	CG12140	FBgn0032945	CG8665	FBgn0003308	ry	FBgn0025595	GRHR	FBgn0015663	Dot	FBgn0036516	CG7656	FBgn0032297	CG17124	FBgn0064123	stg1	FBgn0020368	Vha68-1	FBgn0026439	Eaat1	FBgn0051213	CG31213
FBgn0041627	Ku80	FBgn0062440	CG17680	FBgn0030855	CG5800	FBgn0003887	betaTub56D	FBgn0030142		FBgn0063670	CG40228	FBgn0031745	CG8965	FBgn0036039	Naa60	FBgn0040091	Ugt58Fa	FBgn0039087	CG10168	FBgn0040257	Ugt86Dc	FBgn0040252	Ugt86Dh	FBgn0051126	CG31126	FBgn0032195	CG4908	FBgn0032002	CG8353	FBgn0051075	CG31075	FBgn0030753	rngo	FBgn0032689	CG10413	FBgn0025595	GRHR	FBgn0014011	Rac2	FBgn0026313	X11L	FBgn0051534		FBgn0034218	CG18467	FBgn0034656	CG17922	FBgn0031171	CG1801
FBgn0037717	CG8301	FBgn0030855	CG5800	FBgn0038331	CG5073	FBgn0017578	Max	FBgn0262560	wcd	FBgn0031255	BBS8	FBgn0031196	CG17599	FBgn0011584	Trp1	FBgn0015663	Dot	FBgn0040252	Ugt86Dh	FBgn0261794	kcc	FBgn0040250	Ugt86Dj	FBgn0011638	La	FBgn0032261	CG6094	FBgn0032449	CG17036	FBgn0040336	Seipin	FBgn0031092	CG9577	FBgn0052099	eap	FBgn0002284	Pros26	FBgn0051935	CG31935	FBgn0035171	CG12502	FBgn0035206	CG9186	FBgn0011455	l(3)neo18	FBgn0261612	Cng	FBgn0035333	CG1317
FBgn0039212	Syx18	FBgn0000239	bur	FBgn0039227	polybromo	FBgn0021761	Nup154	FBgn0261596	RpS24	FBgn0031745	CG8965	FBgn0051121	CG31121	FBgn0005658	Ets65A	FBgn0260049	flr	FBgn0040259	Ugt86Da	FBgn0259243	Pka-R1	FBgn0040253	Ugt86Dg	FBgn0250874	ttm50	FBgn0020367		FBgn0040340	TRAM	FBgn0037166	CG11426	FBgn0034999	CG3394	FBgn0034372	Gint3	FBgn0032689	CG10413	FBgn0259749	mmy	FBgn0036926	CG7646	FBgn0036926	CG7646	FBgn0004366	rdgC	FBgn0002938	ninaC	FBgn0035046	CG3683
FBgn0015520	nonA-l	FBgn0039227	polybromo	FBgn0024945	NitFhit	FBgn0026319	Traf4	FBgn0033615	CG7741	FBgn0051121	CG31121	FBgn0032297	CG17124	FBgn0005660	Ets21C	FBgn0085443	spri	FBgn0052677	X11Lbeta	FBgn0262511	Vha44	FBgn0040255	Ugt86De	FBgn0037380		FBgn0038810	Srp72	FBgn0033879	CG6543	FBgn0001258	ImpL3	FBgn0032945	CG8665	FBgn0035236	CG12004	FBgn0052099	eap	FBgn0034656	CG17922	FBgn0003638	su(w[a])	FBgn0003638	su(w[a])	FBgn0002938	ninaC	FBgn0000568	Eip75B	FBgn0011559	Acp36DE
FBgn0040347	mus81	FBgn0024945	NitFhit	FBgn0041186	Slbp	FBgn0085403	Rapgap1	FBgn0034564	CG9344	FBgn0030142		FBgn0036579	CG5027	FBgn0260049	flr	FBgn0033873	CG6337	FBgn0038436	Gyc-89Db	FBgn0038528	CG14326	FBgn0040256	Ugt86Dd	FBgn0032195	CG4908	FBgn0042112	mRpL36	FBgn0034191	CG6984	FBgn0000477	DNaseII	FBgn0051075	CG31075	FBgn0039742	CG15528	FBgn0034372	Gint3	FBgn0034709	Swim	FBgn0030524	CG10993	FBgn0034372	Gint3	FBgn0004242	Syt1	FBgn0031299	CG4629	FBgn0250906	Pgk
FBgn0062440	CG17680	FBgn0031766	CG9117	FBgn0003887	betaTub56D	FBgn0031745	CG8965	FBgn0030061	CG1785	FBgn0036519	CG7650	FBgn0014002	Pdi	FBgn0261649	tinc	FBgn0035592	CG10674	FBgn0038295	Gyc88E	FBgn0038436	Gyc-89Db	FBgn0026315	Ugt35a	FBgn0038436	Gyc-89Db	FBgn0032820	fbp	FBgn0026562	BM-40-SPARC	FBgn0015808	ScpX	FBgn0039714	CG7816	FBgn0035631	Txl	FBgn0035236	CG12004	FBgn0026250	eIF-1A	FBgn0011224	heph	FBgn0037050	CG10566	FBgn0085385	CG34356	FBgn0261108	Atg13	FBgn0031451	CG9961
FBgn0030855	CG5800	FBgn0041186	Slbp	FBgn0021761	Nup154	FBgn0036254	CG5645	FBgn0029672	CG2875	FBgn0014877	Roe1	FBgn0024728	Slip1	FBgn0035208	CG9184	FBgn0050441	CG30441	FBgn0037847	SelR	FBgn0038435	Gyc-89Da	FBgn0040259	Ugt86Da	FBgn0038435	Gyc-89Da	FBgn0262116	CG40127	FBgn0037912	sea	FBgn0032715	CG17597	FBgn0023549	Mct1	FBgn0001977	l(2)35Bg	FBgn0043012	AP-2sigma	FBgn0032726	CG10621	FBgn0051935	CG31935	FBgn0040900	CG17777	FBgn0039648	CG14515	FBgn0019957	ND42	FBgn0036992	CG11796
FBgn0000239	bur	FBgn0003887	betaTub56D	FBgn0037737	Pnn	FBgn0034748	CG17807	FBgn0051002	CG31002	FBgn0261596	RpS24	FBgn0029672	CG2875	FBgn0039159	mRpS24	FBgn0036984	CG13248	FBgn0035364		FBgn0038295	Gyc88E	FBgn0040257	Ugt86Dc	FBgn0020367		FBgn0039650	Mesh1	FBgn0037744	CG8417	FBgn0030519	CG11151	FBgn0015808	ScpX	FBgn0036988	CG5262	FBgn0000382	csw	FBgn0030114	CG17754	FBgn0039887	CG2053	FBgn0038435	Gyc-89Da	FBgn0038735	CG4662	FBgn0033685	CG13178	FBgn0034137	CG4945
FBgn0039227	polybromo	FBgn0038269	Rrp6	FBgn0026319	Traf4	FBgn0262560	wcd	FBgn0020510	Abi	FBgn0036579	CG5027	FBgn0051002	CG31002	FBgn0035522	CG1273	FBgn0002968	Nrg	FBgn0053547	Rim	FBgn0020367		FBgn0027073	CG4302	FBgn0035364		FBgn0037898	CG18643	FBgn0037167	CG11425	FBgn0030731	Mfe2	FBgn0029093	cathD	FBgn0001961	Sop2	FBgn0035631	Txl	FBgn0261108	Atg13	FBgn0261641	CG42724	FBgn0030524	CG10993	FBgn0035657	alphaKap4	FBgn0000346	comt	FBgn0026314	Ugt35b
FBgn0024945	NitFhit	FBgn0030093	dalao	FBgn0033929	Tfb1	FBgn0261596	RpS24	FBgn0024249	cato	FBgn0033663	ERp60	FBgn0040091	Ugt58Fa	FBgn0015790	Rab11	FBgn0010397	LamC	FBgn0014011	Rac2	FBgn0035364		FBgn0034605	CG15661	FBgn0053547	Rim	FBgn0033873	CG6337	FBgn0002773	Mlc2	FBgn0038115	CG7966	FBgn0037592	CG11737	FBgn0036516	CG7656	FBgn0001977	l(2)35Bg	FBgn0033212	CG1399	FBgn0004832	Xpac	FBgn0003435	sm	FBgn0019957	ND42	FBgn0034723	CG13506	FBgn0040256	Ugt86Dd
FBgn0031766	CG9117	FBgn0026318	Traf6	FBgn0085403	Rapgap1	FBgn0260241	tatl	FBgn0015550	tap	FBgn0014002	Pdi	FBgn0015663	Dot	FBgn0035592	CG10674	FBgn0262483	Rbp	FBgn0036616	CG4893	FBgn0053547	Rim	FBgn0261794	kcc	FBgn0086447	l(2)37Cg	FBgn0035592	CG10674	FBgn0022708	Adk2	FBgn0038299	Spn88Eb	FBgn0034005	alphaPS4	FBgn0021768	nudC	FBgn0036988	CG5262	FBgn0037730	CG9444	FBgn0032726	CG10621	FBgn0034218	CG18467	FBgn0040963	CG18662	FBgn0038285	CG6974	FBgn0042179	CG18869
FBgn0032916	CG9257	FBgn0029176	Ef1gamma	FBgn0029176	Ef1gamma	FBgn0033615	CG7741	FBgn0261789	SmD2	FBgn0034564	CG9344	FBgn0052677	X11Lbeta	FBgn0037467	CG1104	FBgn0032002	CG8353	FBgn0085443	spri	FBgn0036616	CG4893	FBgn0036926	CG7646	FBgn0039159	mRpS24	FBgn0033482	CG1371	FBgn0036208	CG10361	FBgn0036875	CG9449	FBgn0031589	CG3714	FBgn0039165	CG6204	FBgn0036516	CG7656	FBgn0028491	CG2930	FBgn0030114	CG17754	FBgn0039887	CG2053	FBgn0039765	mRpS18C	FBgn0034877	levy	FBgn0050438	CG30438
FBgn0041186	Slbp	FBgn0036697	rogdi	FBgn0261456	hpo	FBgn0038666	CG5451	FBgn0020909	Rtc1	FBgn0051002	CG31002	FBgn0020510	Abi	FBgn0037541	CG2747	FBgn0033252	CG12769	FBgn0261612	Cng	FBgn0034709	Swim	FBgn0259243	Pka-R1	FBgn0042112	mRpL36	FBgn0015245	Hsp60	FBgn0035189	CG9119	FBgn0000565	Eip71CD	FBgn0000565	Eip71CD	FBgn0259697	nvd	FBgn0039532	Mtl	FBgn0026369	Sara	FBgn0030208	PPP4R2r	FBgn0034491	CG11055	FBgn0028436	ECSIT	FBgn0033520	Prx2540-1	FBgn0037512	CG2616
FBgn0034068	casp	FBgn0261456	hpo	FBgn0033062	Ars2	FBgn0034564	CG9344	FBgn0030768	CG9723	FBgn0032713	CG17323	FBgn0015550	tap	FBgn0015245	Hsp60	FBgn0030569	CG9411	FBgn0033873	CG6337	FBgn0085385	CG34356	FBgn0262511	Vha44	FBgn0038183	CG9286	FBgn0014930	CG2846	FBgn0031148	Cbs	FBgn0034110	Atg9	FBgn0034110	Atg9	FBgn0040228	dyn-p25	FBgn0021768	nudC	FBgn0035553	CG13722	FBgn0014163	fax	FBgn0037364	Rab23	FBgn0038285	CG6974	FBgn0033521	CG12896	FBgn0037298	CG2604
FBgn0030093	dalao	FBgn0030142		FBgn0262560	wcd	FBgn0030061	CG1785	FBgn0043012	AP-2sigma	FBgn0020510	Abi	FBgn0036926	CG7646	FBgn0010051	Itp-r83A	FBgn0037395	CG10280	FBgn0036984	CG13248	FBgn0032891	Oseg5	FBgn0038009	CG17738	FBgn0032820	fbp	FBgn0027093	Aats-arg	FBgn0032904	Mtp	FBgn0052698	CG32698	FBgn0045980	niki	FBgn0038463	CG3534	FBgn0051935	CG31935	FBgn0029823	CG3011	FBgn0031375	erm	FBgn0032032	CG17294	FBgn0028546	ics	FBgn0016975	stnB	FBgn0031550	Che-13
FBgn0021761	Nup154	FBgn0044871	Gos28	FBgn0260241	tatl	FBgn0011474	pr-set7	FBgn0039427	CG5447	FBgn0015550	tap	FBgn0038474	mRpS11	FBgn0261602	RpL8	FBgn0028546	ics	FBgn0037698	CG16779	FBgn0014930	CG2846	FBgn0038528	CG14326	FBgn0003942	RpS27A	FBgn0000100	RpLP0	FBgn0027571	CG3523	FBgn0032373	Vha100-5	FBgn0052698	CG32698	FBgn0030521	CtsB1	FBgn0037647	RagA	FBgn0033520	Prx2540-1	FBgn0034829	CG9899	FBgn0037541	CG2747	FBgn0043070	MESK2	FBgn0029846		FBgn0036125	CG6279
FBgn0261922	PI4KIIIalpha	FBgn0035028	Start1	FBgn0033615	CG7741	FBgn0029672	CG2875	FBgn0050077	blos1	FBgn0261789	SmD2	FBgn0039132	AP-1sigma	FBgn0002968	Nrg	FBgn0026562	BM-40-SPARC	FBgn0002968	Nrg	FBgn0010397	LamC	FBgn0038436	Gyc-89Db	FBgn0037328	RpL35A	FBgn0031497	CG17259	FBgn0000477	DNaseII	FBgn0000116	Argk	FBgn0051183	CG31183	FBgn0010591	Sply	FBgn0011708	Syx5	FBgn0033521	CG12896	FBgn0030395	CG15730	FBgn0039498	CG17991	FBgn0035473	mge	FBgn0026176	skpB	FBgn0262010	CG42828
FBgn0037737	Pnn	FBgn0033062	Ars2	FBgn0039867	CstF-50	FBgn0051002	CG31002	FBgn0025582	Int6	FBgn0036847	CG11577	FBgn0050077	blos1	FBgn0262483	Rbp	FBgn0051660	pog	FBgn0010397	LamC	FBgn0262483	Rbp	FBgn0038435	Gyc-89Da	FBgn0033540	Elp2	FBgn0035298	CG1140	FBgn0032715	CG17597	FBgn0015221	Fer2LCH	FBgn0015221	Fer2LCH	FBgn0032727	CG10623	FBgn0259697	nvd	FBgn0053105	p24-2	FBgn0027608	CG2082	FBgn0024985	CG11448	FBgn0086778	gfA	FBgn0037315	Cerk	FBgn0262009	CG42827
FBgn0260012	pds5	FBgn0262560	wcd	FBgn0038666	CG5451	FBgn0085451	CG34422	FBgn0011638	La	FBgn0033842	cbc	FBgn0052000	CG32000	FBgn0037351	RpL13A	FBgn0016078	wun	FBgn0259222	CG42322	FBgn0262512	Vha14-1	FBgn0038295	Gyc88E	FBgn0037898	CG18643	FBgn0262512	Vha14-1	FBgn0039697	CG7834	FBgn0015222	Fer1HCH	FBgn0015222	Fer1HCH	FBgn0033212	CG1399	FBgn0015790	Rab11	FBgn0024734	PRL-1	FBgn0035970	CG4483	FBgn0000568	Eip75B	FBgn0037138	P5CDh1	FBgn0028371	jbug	FBgn0032971	ttm3
FBgn0026318	Traf6	FBgn0030655	CG9213	FBgn0011704	RnrS	FBgn0020510	Abi	FBgn0037252	CG14650	FBgn0020909	Rtc1	FBgn0011584	Trp1	FBgn0039527	CG5639	FBgn0051721	Trim9	FBgn0262483	Rbp	FBgn0028665	VhaAC39-1	FBgn0020367		FBgn0035753	RpL18	FBgn0039765	mRpS18C	FBgn0038115	CG7966	FBgn0030756	CG9903	FBgn0030756	CG9903	FBgn0028685	Rpt4	FBgn0014009	Rab2	FBgn0027608	CG2082	FBgn0086778	gfA	FBgn0000448	Hr46	FBgn0026176	skpB	FBgn0021967	Pdsw	FBgn0035124	ttm2
FBgn0033929	Tfb1	FBgn0036579	CG5027	FBgn0024728	Slip1	FBgn0024249	cato	FBgn0015527	pen	FBgn0039132	AP-1sigma	FBgn0058042	CG40042	FBgn0013998	Nsf2	FBgn0034417	CG15117	FBgn0028491	CG2930	FBgn0033269		FBgn0053547	Rim	FBgn0085385	CG34356	FBgn0028665	VhaAC39-1	FBgn0033494	KCNQ	FBgn0039049	CG6726	FBgn0000078	Amy-d	FBgn0038110	CG8031	FBgn0030521	CtsB1	FBgn0039109	CG10365	FBgn0039109	CG10365	FBgn0038735	CG4662	FBgn0262535	CG43089	FBgn0053098	CG33098	FBgn0030620	CG5662
FBgn0034641	mahj	FBgn0033663	ERp60	FBgn0030061	CG1785	FBgn0010433	ato	FBgn0036487	Prp31	FBgn0039427	CG5447	FBgn0005658	Ets65A	FBgn0030569	CG9411	FBgn0034938	CG3803	FBgn0032002	CG8353	FBgn0003206	Ras64B	FBgn0036616	CG4893	FBgn0032891	Oseg5	FBgn0033465	CG12140	FBgn0262467	Scox	FBgn0000078	Amy-d	FBgn0052626	CG32626	FBgn0029823	CG3011	FBgn0003371	sgg	FBgn0003129	Poxm	FBgn0036221	CG11588	FBgn0035020	CG13585	FBgn0032415	rho-6	FBgn0038916	dnd	FBgn0029752	TrxT
FBgn0030499	CG11178	FBgn0039867	CstF-50	FBgn0011474	pr-set7	FBgn0015550	tap	FBgn0020305	dbe	FBgn0025582	Int6	FBgn0010333	Rac1	FBgn0029897	RpL17	FBgn0041097	robo3	FBgn0259736	CG42390	FBgn0029846		FBgn0262116	CG40127	FBgn0015245	Hsp60	FBgn0028436	ECSIT	FBgn0038299	Spn88Eb	FBgn0034884	CG17662	FBgn0010225	Gel	FBgn0030753	rngo	FBgn0026250	eIF-1A	FBgn0035285	CG12025	FBgn0026174	skpD	FBgn0035657	alphaKap4	FBgn0031264	CG11835	FBgn0028507	CG3793	FBgn0036442	CG13473
FBgn0023508	Ocrl	FBgn0024728	Slip1	FBgn0029672	CG2875	FBgn0031493	CG3605	FBgn0028473	CG8801	FBgn0045759	bin	FBgn0261649	tinc	FBgn0034362	CG5323	FBgn0033913	CG8468	FBgn0033252	CG12769	FBgn0040384	CG32795	FBgn0028697	RpL15	FBgn0261602	RpL8	FBgn0032407	Pex19	FBgn0023507	CG3835	FBgn0051148	CG31148	FBgn0003267	ro	FBgn0011726	tsr	FBgn0010591	Sply	FBgn0260660	mp	FBgn0003295	ru	FBgn0027539	CG5807	FBgn0031473	CG3104	FBgn0039773	CG2224	FBgn0020368	Vha68-1
FBgn0035589	CHMP2B	FBgn0037491	CG1227	FBgn0038886	CG6475	FBgn0261789	SmD2	FBgn0086447	l(2)37Cg	FBgn0015527	pen	FBgn0036008	CG3408	FBgn0033199	CG17985	FBgn0031948	CG7149	FBgn0034723	CG13506	FBgn0032151	nAcRalpha-30D	FBgn0034709	Swim	FBgn0027093	Aats-arg	FBgn0034362	CG5323	FBgn0040211	hgo	FBgn0010225	Gel	FBgn0028686	Rpt3	FBgn0031092	CG9577	FBgn0032727	CG10623	FBgn0003295	ru	FBgn0260798	Gprk1	FBgn0259222	CG42322	FBgn0053098	CG33098	FBgn0037747	CG8481	FBgn0032464	Vha68-3
FBgn0037383	CG2023	FBgn0036842	CG3797	FBgn0036842	CG3797	FBgn0020909	Rtc1	FBgn0052708	CG32708	FBgn0036920	CG8004	FBgn0035208	CG9184	FBgn0030065	CG12075	FBgn0033668	CG13188	FBgn0028546	ics	FBgn0010329	Tbh	FBgn0004242	Syt1	FBgn0000100	RpLP0	FBgn0037395	CG10280	FBgn0030239	CG17333	FBgn0035438	PHGPx	FBgn0035438	PHGPx	FBgn0050423	CG30423	FBgn0000448	Hr46	FBgn0035107	mri	FBgn0038881	CG16791	FBgn0037402	Vha14-2	FBgn0002773	Mlc2	FBgn0086711	mol	FBgn0038934	Gld2
FBgn0036254	CG5645	FBgn0027070	CG17322	FBgn0085451	CG34422	FBgn0028982	Spt6	FBgn0010333	Rac1	FBgn0011584	Trp1	FBgn0022959	yps	FBgn0031985	mon2	FBgn0051259	CG31259	FBgn0003206	Ras64B	FBgn0051660	pog	FBgn0085385	CG34356	FBgn0036984	CG13248	FBgn0031479	Prx6005	FBgn0036876	CG9451	FBgn0040064	yip2	FBgn0040064	yip2	FBgn0034573	CG3295	FBgn0030114	CG17754	FBgn0024841	Pcd	FBgn0035935	mfr	FBgn0259200	CG42304	FBgn0033633	CG7759	FBgn0030853	CG5703	FBgn0036056	CG6709
FBgn0034521	Mgat1	FBgn0085451	CG34422	FBgn0010433	ato	FBgn0030768	CG9723	FBgn0032409	Ced-12	FBgn0020305	dbe	FBgn0035522	CG1273	FBgn0014141	cher	FBgn0028984	Spn5	FBgn0032151	nAcRalpha-30D	FBgn0053696	CG33696	FBgn0032891	Oseg5	FBgn0037698	CG16779	FBgn0260460	mRpS34	FBgn0037709	CG8199	FBgn0040383	CG5254	FBgn0260744	Tango9	FBgn0030694	CG15602	FBgn0033212	CG1399	FBgn0037442	CG10277	FBgn0035099	CG6845	FBgn0261086	Syt14	FBgn0036282	Smyd4	FBgn0034660	lox2	FBgn0034218	CG18467
FBgn0030142		FBgn0003270	amos	FBgn0031493	CG3605	FBgn0038464	CG16941	FBgn0036696	CG14057	FBgn0005658	Ets65A	FBgn0262116	CG40127	FBgn0037164	CG11438	FBgn0016920	nompC	FBgn0026562	BM-40-SPARC	FBgn0034971	CG3209	FBgn0033924	CG8613	FBgn0031497	CG17259	FBgn0025336	CG4882	FBgn0039827	CG1544	FBgn0026878	CG4325	FBgn0026878	CG4325	FBgn0034999	CG3394	FBgn0039213	atl	FBgn0035099	CG6845	FBgn0052320	CG32320	FBgn0039527	CG5639	FBgn0011566	Bzd	FBgn0031436	CG3214	FBgn0011455	l(3)neo18
FBgn0044871	Gos28	FBgn0031493	CG3605	FBgn0261789	SmD2	FBgn0043012	AP-2sigma	FBgn0022959	yps	FBgn0036118	blos2	FBgn0000258		FBgn0036282	Smyd4	FBgn0260487	CG42534	FBgn0010329	Tbh	FBgn0026753	Vha13	FBgn0014930	CG2846	FBgn0035298	CG1140	FBgn0035471	Sc2	FBgn0039486	CG6074	FBgn0029648	CG3603	FBgn0036985	zye	FBgn0034914	CG5554	FBgn0028685	Rpt4	FBgn0037553	CG18249	FBgn0243486	rdo	FBgn0050263	CG30263	FBgn0029942	CG2059	FBgn0033734	CG8520	FBgn0002938	ninaC
FBgn0036519	CG7650	FBgn0028331	l(1)G0289	FBgn0037371	Sym	FBgn0050077	blos1	FBgn0039505	CG5934	FBgn0052708	CG32708	FBgn0028697	RpL15	FBgn0015797	Rab6	FBgn0004456	mew	FBgn0260660	mp	FBgn0031473	CG3104	FBgn0261108	Atg13	FBgn0262483	Rbp	FBgn0040384	CG32795	FBgn0000116	Argk	FBgn0036181	Muc68Ca	FBgn0036181	Muc68Ca	FBgn0037315	Cerk	FBgn0038110	CG8031	FBgn0033313	Cirl	FBgn0033313	Cirl	FBgn0034829	CG9899	FBgn0005664	Cry	FBgn0038321	CG6218	FBgn0031279	CG3544
FBgn0034858	eIF2B-delta	FBgn0261789	SmD2	FBgn0038640	CG7706	FBgn0004567	slp2	FBgn0003525	stg	FBgn0038810	Srp72	FBgn0035626	lin-28	FBgn0051721	Trim9	FBgn0262562	CG43102	FBgn0051660	pog	FBgn0037163	laza	FBgn0036984	CG13248	FBgn0262512	Vha14-1	FBgn0037846	CG6574	FBgn0037607	CG8036	FBgn0031412	CG16995	FBgn0039154	Npc2f	FBgn0051075	CG31075	FBgn0259736	CG42390	FBgn0039848	lox	FBgn0031715	tomb	FBgn0010504	kermit	FBgn0024841	Pcd	FBgn0017566	ND75	FBgn0039498	CG17991
FBgn0039153	CG5463	FBgn0002284	Pros26	FBgn0001179	hay	FBgn0003430	slp1	FBgn0260635	th	FBgn0010341	Cdc42	FBgn0037467	CG1104	FBgn0034417	CG15117	FBgn0039466	CG5521	FBgn0050194	CG30194	FBgn0028427	Ilk	FBgn0010397	LamC	FBgn0037351	RpL13A	FBgn0032449	CG17036	FBgn0031662	CG3792	FBgn0039154	Npc2f	FBgn0032074	Tsp29Fa	FBgn0031450	Hrs	FBgn0026369	Sara	FBgn0260746	Ect3	FBgn0001089	Gal	FBgn0030395	CG15730	FBgn0003016	osp	FBgn0000409	Cyt-c-p	FBgn0046332	gskt
FBgn0001308	Khc	FBgn0036847	CG11577	FBgn0051739	CG31739	FBgn0039937	fd102C	FBgn0039300	RpS27	FBgn0010333	Rac1	FBgn0037541	CG2747	FBgn0001258	ImpL3	FBgn0259110	mmd	FBgn0028371	jbug	FBgn0022708	Adk2	FBgn0262512	Vha14-1	FBgn0037883	CG14701	FBgn0040340	TRAM	FBgn0039049	CG6726	FBgn0032074	Tsp29Fa	FBgn0039241	CG11089	FBgn0016078	wun	FBgn0029823	CG3011	FBgn0001089	Gal	FBgn0052507	CG32507	FBgn0027608	CG2082	FBgn0052320	CG32320	FBgn0029888	CG3192	FBgn0032525	Hsp60D
FBgn0004380	Klp64D	FBgn0033842	cbc	FBgn0028982	Spt6	FBgn0045759	bin	FBgn0052533	CG32533	FBgn0035401	CG1291	FBgn0000448	Hr46	FBgn0013325	RpL11	FBgn0017397		FBgn0028427	Ilk	FBgn0035189	CG9119	FBgn0037883	CG14701	FBgn0028665	VhaAC39-1	FBgn0035374	mRpS35	FBgn0032287	CG6415	FBgn0032075	Tsp29Fb	FBgn0000052	ade2	FBgn0032955	CG2201	FBgn0011726	tsr	FBgn0052507	CG32507	FBgn0032305	CG6700	FBgn0030065	CG12075	FBgn0003091	Pkc53E	FBgn0050100	CG30100	FBgn0011244	Hsp60B
FBgn0037332	Hcs	FBgn0038640	CG7706	FBgn0030768	CG9723	FBgn0011638	La	FBgn0001197	His2Av	FBgn0036696	CG14057	FBgn0033482	CG1371	FBgn0003016	osp	FBgn0039756	CG9743	FBgn0028496	CG30116	FBgn0037747	CG8481	FBgn0028665	VhaAC39-1	FBgn0260441	RpS12	FBgn0033879	CG6543	FBgn0036997	CG5955	FBgn0030251	CG2145	FBgn0016715	Reg-2	FBgn0261014	TER94	FBgn0024734	PRL-1	FBgn0039189	CG18528	FBgn0010772	Xe7	FBgn0035970	CG4483	FBgn0031708	CG7382	FBgn0259822	Ca-beta	FBgn0031728	Hsp60C
FBgn0260241	tatl	FBgn0001179	hay	FBgn0036686	CG7728	FBgn0037252	CG14650	FBgn0033540	Elp2	FBgn0013762	Cdk5	FBgn0010051	Itp-r83A	FBgn0041097	robo3	FBgn0039838	CG3669	FBgn0041097	robo3	FBgn0027571	CG3523	FBgn0034723	CG13506	FBgn0029897	RpL17	FBgn0034191	CG6984	FBgn0020506	Amyrel	FBgn0016715	Reg-2	FBgn0052191	CG32191	FBgn0037442	CG10277	FBgn0027608	CG2082	FBgn0027569	cert	FBgn0262017	CG42830	FBgn0086778	gfA	FBgn0259822	Ca-beta	FBgn0032511	CG9306	FBgn0035657	alphaKap4
FBgn0030655	CG9213	FBgn0051739	CG31739	FBgn0038464	CG16941	FBgn0034908	CG5543	FBgn0035626	lin-28	FBgn0036008	CG3408	FBgn0050441	CG30441	FBgn0040079	pkaap	FBgn0029962	CG1402	FBgn0003093	Pkc98E	FBgn0000083	AnnIX	FBgn0028546	ics	FBgn0034362	CG5323	FBgn0037912	sea	FBgn0027580	CG1516	FBgn0039840	CG11340	FBgn0032170	CG4658	FBgn0035099	CG6845	FBgn0037846	CG6574	FBgn0036461	CG10006	FBgn0035173	CG13907	FBgn0021953	Fatp	FBgn0085503	CG40625	FBgn0039208	Esyt2	FBgn0037402	Vha14-2
FBgn0032341	Reps	FBgn0261617	nej	FBgn0015546	spel1	FBgn0015527	pen	FBgn0016978	snRNP-U1-70K	FBgn0035208	CG9184	FBgn0024244	drm	FBgn0021795	Tapdelta	FBgn0033791	Drl-2	FBgn0027569	cert	FBgn0039208	Esyt2	FBgn0003206	Ras64B	FBgn0260460	mRpS34	FBgn0037744	CG8417	FBgn0034885	CG4019	FBgn0085256	CG34227	FBgn0085256	CG34227	FBgn0028872	CG18095	FBgn0031092	CG9577	FBgn0030749	Anxb11	FBgn0032470	CG5142	FBgn0036221	CG11588	FBgn0029662	CG12206	FBgn0001128	Gpdh	FBgn0030440	CG15719
FBgn0039867	CstF-50	FBgn0020909	Rtc1	FBgn0035110	thoc7	FBgn0032488	CG16812	FBgn0030851	CG8326	FBgn0039159	mRpS24	FBgn0002968	Nrg	FBgn0000083	AnnIX	FBgn0259099	DCX-EMAP	FBgn0035877	CG7083	FBgn0033913	CG8468	FBgn0024734	PRL-1	FBgn0029980	CG10778	FBgn0034971	CG3209	FBgn0035083	Tina-1	FBgn0039591	CG9988	FBgn0001142	Gs1	FBgn0027569	cert	FBgn0050423	CG30423	FBgn0027581	CG6191	FBgn0029903	pod1	FBgn0262535	CG43089	FBgn0039054	CG13830	FBgn0019624	CoVa	FBgn0019957	ND42
FBgn0030672	CG9281	FBgn0028982	Spt6	FBgn0050077	blos1	FBgn0036487	Prp31	FBgn0039183	Dis3	FBgn0042112	mRpL36	FBgn0037240	Cont	FBgn0031118	RhoGAP19D	FBgn0052532	CG32532	FBgn0039208	Esyt2	FBgn0083959	trpm	FBgn0040384	CG32795	FBgn0016975	stnB	FBgn0039698	CG7789	FBgn0031877	CG10399	FBgn0033906	CG8331	FBgn0000535	eag	FBgn0036461	CG10006	FBgn0034573	CG3295	FBgn0035877	CG7083	FBgn0033933	CG10104	FBgn0003295	ru	FBgn0033668	CG13188	FBgn0038072	CG6225	FBgn0042710	Hex-t2
FBgn0011704	RnrS	FBgn0030768	CG9723	FBgn0025582	Int6	FBgn0020305	dbe	FBgn0003275	RpII18	FBgn0037780	CG3925	FBgn0031600	CG3652	FBgn0032821	CdGAPr	FBgn0259179	CG42284	FBgn0029723	Proc-R	FBgn0033494	KCNQ	FBgn0032151	nAcRalpha-30D	FBgn0033548	CG7637	FBgn0037164	CG11438	FBgn0029969	CG10932	FBgn0031533	CG2772	FBgn0036996	mag	FBgn0039714	CG7816	FBgn0035285	CG12025	FBgn0038651	CG14299	FBgn0038919	CG17843	FBgn0050157	CG30157	FBgn0003162	Pu	FBgn0033109	coro	FBgn0042711	Hex-t1
FBgn0030061	CG1785	FBgn0036686	CG7728	FBgn0004567	slp2	FBgn0028473	CG8801	FBgn0011764	Dsp1	FBgn0023512	eIF2B-epsilon	FBgn0013998	Nsf2	FBgn0033913	CG8468	FBgn0036319	Ent3	FBgn0031948	CG7149	FBgn0031069	Pmp70	FBgn0010329	Tbh	FBgn0029846		FBgn0037167	CG11425	FBgn0020236	ATPCL	FBgn0036996	mag	FBgn0024740	Lip2	FBgn0032305	CG6700	FBgn0034914	CG5554	FBgn0035173	CG13907	FBgn0032680	Ntf-2r	FBgn0028371	jbug	FBgn0261955	kdn	FBgn0261955	kdn	FBgn0001186	Hex-A
FBgn0035424	CG11505	FBgn0038464	CG16941	FBgn0003430	slp1	FBgn0038272	CG7265	FBgn0031832	CG9596	FBgn0036277	CG10418	FBgn0033521	CG12896	FBgn0259100		FBgn0031730	CG7236	FBgn0026411	Lim1	FBgn0086347	Myo31DF	FBgn0051660	pog	FBgn0032449	CG17036	FBgn0029942	CG2059	FBgn0037250	CG1074	FBgn0051089	CG31089	FBgn0028886	CG15279	FBgn0011327	Uch-L3	FBgn0037315	Cerk	FBgn0033667	CG13183	FBgn0035140	CG17180	FBgn0031264	CG11835	FBgn0032680	Ntf-2r	FBgn0024986	CG3719	FBgn0001187	Hex-C
FBgn0011474	pr-set7	FBgn0038675	CG6013	FBgn0039937	fd102C	FBgn0025458		FBgn0027951	MTA1-like	FBgn0030944	CG6617	FBgn0013750	Arf51F	FBgn0003460	so	FBgn0039053	CG6738	FBgn0039054	CG13830	FBgn0033109	coro	FBgn0053696	CG33696	FBgn0035374	mRpS35	FBgn0022708	Adk2	FBgn0023537	CG17896	FBgn0051091	CG31091	FBgn0030688	CG8952	FBgn0035877	CG7083	FBgn0051075	CG31075	FBgn0037074	CG7324	FBgn0035693	CG8219	FBgn0037164	CG11438	FBgn0051999	CG31999	FBgn0033631	Sod3	FBgn0001281	janB
FBgn0040475	SH3PX1	FBgn0035110	thoc7	FBgn0023171	rnh1	FBgn0032409	Ced-12	FBgn0037240	Cont	FBgn0259483	Mob4	FBgn0024734	PRL-1	FBgn0026411	Lim1	FBgn0034693	CG11073	FBgn0031069	Pmp70	FBgn0051454	CG31454	FBgn0034971	CG3209	FBgn0010409	RpL18A	FBgn0036335	mRpL20	FBgn0035588	CG10672	FBgn0032981	CG3635	FBgn0011230	poe	FBgn0038651	CG14299	FBgn0029911	CG14435	FBgn0028984	Spn5	FBgn0037843	CG4511	FBgn0051802	CG31802	FBgn0038912	CG6656	FBgn0038126	CG8483	FBgn0041102	ocn
FBgn0037491	CG1227	FBgn0039427	CG5447	FBgn0034908	CG5543	FBgn0036696	CG14057	FBgn0002525	Lam	FBgn0260635	th	FBgn0033199	CG17985	FBgn0051559	CG31559	FBgn0050502	fa2h	FBgn0033667	CG13183	FBgn0051259	CG31259	FBgn0026753	Vha13	FBgn0032151	nAcRalpha-30D	FBgn0001258	ImpL3	FBgn0030968	CG7322	FBgn0024740	Lip2	FBgn0039519	Cyp6a18	FBgn0032864	CG2493	FBgn0031450	Hrs	FBgn0003328	scb	FBgn0039179		FBgn0038915	CG17819	FBgn0032210	CYLD	FBgn0038309	CG6499	FBgn0040963	CG18662
FBgn0036842	CG3797	FBgn0032340	Ge-1	FBgn0015527	pen	FBgn0014189	Hel25E	FBgn0000482	dor	FBgn0039300	RpS27	FBgn0027101	Dyrk3	FBgn0010470	Fkbp13	FBgn0034883	CG17664	FBgn0033668	CG13188	FBgn0016920	nompC	FBgn0037163	laza	FBgn0010329	Tbh	FBgn0034938	CG3803	FBgn0029648	CG3603	FBgn0036300	CG10688	FBgn0034756	Cyp6d2	FBgn0023549	Mct1	FBgn0016078	wun	FBgn0035140	CG17180	FBgn0262477	FoxP	FBgn0259737	CG42391	FBgn0262477	FoxP	FBgn0028325	l(1)G0334	FBgn0032003	CG8349
FBgn0027070	CG17322	FBgn0025582	Int6	FBgn0032488	CG16812	FBgn0022959	yps	FBgn0040283	SMC1	FBgn0052533	CG32533	FBgn0039303	CG11857	FBgn0035586	CG10671	FBgn0052528	CG32528	FBgn0086347	Myo31DF	FBgn0033246	ACC	FBgn0000536	eas	FBgn0037912	sea	FBgn0035189	CG9119	FBgn0037354	CG12171	FBgn0032787	CG10195	FBgn0025454	Cyp6g1	FBgn0010590	Prosbeta1	FBgn0261014	TER94	FBgn0036813	Aut1	FBgn0051314	Neu3	FBgn0003016	osp	FBgn0023536	CG3156	FBgn0010352	Nc73EF	FBgn0032001	CG8360
FBgn0026313	X11L	FBgn0039937	fd102C	FBgn0036487	Prp31	FBgn0086736	GckIII	FBgn0002573	sens	FBgn0003942	RpS27A	FBgn0036428	CG9238	FBgn0038853	RhoGAP93B	FBgn0051414	CG31414	FBgn0033109	coro	FBgn0036875	CG9449	FBgn0028427	Ilk	FBgn0051660	pog	FBgn0035630	CG10576	FBgn0051548	CG31548	FBgn0017482	T3dh	FBgn0015039	Cyp9b2	FBgn0024230	Hs2st	FBgn0038881	CG16791	FBgn0038126	CG8483	FBgn0035720	CG10077	FBgn0052320	CG32320	FBgn0010263	Rbp9	FBgn0033880	CG6553	FBgn0259736	CG42390
FBgn0032224	Sps2	FBgn0031799	Pez	FBgn0030974	CG7358	FBgn0029088	disp	FBgn0026873	MED18	FBgn0035626	lin-28	FBgn0003345	sd	FBgn0034956	CG4324	FBgn0051475	CG31475	FBgn0051259	CG31259	FBgn0039856	CG1774	FBgn0022708	Adk2	FBgn0053696	CG33696	FBgn0261380	mRpL37	FBgn0040349	CG3699	FBgn0030688	CG8952	FBgn0038037	Cyp9f2	FBgn0026150	ApepP	FBgn0037442	CG10277	FBgn0051314	Neu3	FBgn0260933	rempA	FBgn0243486	rdo	FBgn0028433	Ggamma30A	FBgn0033188	CG1600	FBgn0029949	CG15035
FBgn0028331	l(1)G0289	FBgn0023171	rnh1	FBgn0020305	dbe	FBgn0036277	CG10418	FBgn0037478	CG2656	FBgn0036462	mRpL39	FBgn0039531	CG5611	FBgn0004456	mew	FBgn0033911	VGAT	FBgn0016920	nompC	FBgn0030403	CG1824	FBgn0037747	CG8481	FBgn0000181	bic	FBgn0021795	Tapdelta	FBgn0016687	Nurf-38	FBgn0039537	CG5590	FBgn0037601	Cyp313b1	FBgn0039890	CG2316	FBgn0037553	CG18249	FBgn0033880	CG6553	FBgn0040629	CG18673	FBgn0033313	Cirl	FBgn0032013	Scgalpha	FBgn0051183	CG31183	FBgn0039694	fig
FBgn0037371	Sym	FBgn0023522	CG11596	FBgn0028473	CG8801	FBgn0030944	CG6617	FBgn0031361	CG17652	FBgn0038834	RpS30	FBgn0040020	MED21	FBgn0003279	RpL4	FBgn0037275	CG14655	FBgn0260487	CG42534	FBgn0033958	CG12858	FBgn0003091	Pkc53E	FBgn0026753	Vha13	FBgn0031777	CG9154	FBgn0053196	dp	FBgn0030734	CG9911	FBgn0034997	CG3376	FBgn0029093	cathD	FBgn0028872	CG18095	FBgn0033188	CG1600	FBgn0037788	CG3940	FBgn0051678	CG31678	FBgn0031926	CG6739	FBgn0032857	CG10947	FBgn0000346	comt
FBgn0002284	Pros26	FBgn0037252	CG14650	FBgn0038272	CG7265	FBgn0000413	da	FBgn0025724	beta'Cop	FBgn0016978	snRNP-U1-70K	FBgn0005561	sv	FBgn0262562	CG43102	FBgn0051719	RluA-1	FBgn0031589	CG3714	FBgn0041210	HDAC4	FBgn0027571	CG3523	FBgn0037167	CG11425	FBgn0030433	mRpL49	FBgn0036181	Muc68Ca	FBgn0031813	CG9527	FBgn0038312	CG4334	FBgn0003162	Pu	FBgn0051678	CG31678	FBgn0037788	CG3940	FBgn0052698	CG32698	FBgn0086898	dgo	FBgn0038956	CG5379	FBgn0031574	CG3964	FBgn0031617	CG15635
FBgn0036847	CG11577	FBgn0034908	CG5543	FBgn0025458		FBgn0003525	stg	FBgn0033518	Prx2540-2	FBgn0032726	CG10621	FBgn0031985	mon2	FBgn0039466	CG5521	FBgn0040780	CG12821	FBgn0024187	syd	FBgn0013334	Sap47	FBgn0000083	AnnIX	FBgn0022708	Adk2	FBgn0034893	mRpL43	FBgn0031824	CG9547	FBgn0034628	Acox57D-p	FBgn0050359	Mal-A5	FBgn0035499	Chd64	FBgn0001089	Gal	FBgn0038129	CG8449	FBgn0039938	Sox102F	FBgn0051851	CG31851	FBgn0058178	CG40178	FBgn0030718	CG9172	FBgn0038565	CG7794
FBgn0038640	CG7706	FBgn0015527	pen	FBgn0010341	Cdc42	FBgn0259483	Mob4	FBgn0031873	Gas41	FBgn0037312	CG11999	FBgn0004635	rho	FBgn0013334	Sap47	FBgn0032059	PrBP	FBgn0262562	CG43102	FBgn0005671	Vha55	FBgn0262124	uex	FBgn0036208	CG10361	FBgn0035355	CG16985	FBgn0035911	CG6638	FBgn0015714	Cyp6a17	FBgn0034289	CG10910	FBgn0037592	CG11737	FBgn0039189	CG18528	FBgn0026619	Taz	FBgn0003513	ss	FBgn0010772	Xe7	FBgn0260943	Rbp6	FBgn0034412	abba	FBgn0010504	kermit
FBgn0001179	hay	FBgn0033737	Nup54	FBgn0035401	CG1291	FBgn0035060	Eps-15	FBgn0050431	CG30431	FBgn0000448	Hr46	FBgn0032651	Oli	FBgn0017397		FBgn0259823	CG42404	FBgn0033958	CG12858	FBgn0038613	Vha100-4	FBgn0039208	Esyt2	FBgn0036335	mRpL20	FBgn0030519	CG11151	FBgn0030251	CG2145	FBgn0033981	Cyp6a21	FBgn0038139	CG8795	FBgn0039844	CG1607	FBgn0027569	cert	FBgn0002069	Aats-asp	FBgn0036496	CG7804	FBgn0262017	CG42830	FBgn0030745	CG4239	FBgn0037544	CG11035	FBgn0034363	CG5327
FBgn0051739	CG31739	FBgn0051716	Cnot4	FBgn0032409	Ced-12	FBgn0031047	Rcd-1	FBgn0032987	RpL21	FBgn0003275	RpII18	FBgn0020766	Aats-phe	FBgn0261260	mgl	FBgn0024947	NTPase	FBgn0259110	mmd	FBgn0028670	Vha100-2	FBgn0033913	CG8468	FBgn0034215	CG4802	FBgn0039697	CG7834	FBgn0001248	Idh	FBgn0039519	Cyp6a18	FBgn0035146	CG13893	FBgn0050392	CG30392	FBgn0036461	CG10006	FBgn0052758	CG32758	FBgn0260943	Rbp6	FBgn0032821	CdGAPr	FBgn0031999	CG8419	FBgn0031228	CG11455	FBgn0034877	levy
FBgn0261617	nej	FBgn0032488	CG16812	FBgn0036696	CG14057	FBgn0260635	th	FBgn0037841	CG4565	FBgn0039450	CG5484	FBgn0260798	Gprk1	FBgn0039756	CG9743	FBgn0002306	sas	FBgn0039756	CG9743	FBgn0032373	Vha100-5	FBgn0029723	Proc-R	FBgn0001258	ImpL3	FBgn0023529	CG2918	FBgn0016715	Reg-2	FBgn0039006	Cyp6d4	FBgn0041183	TepI	FBgn0051999	CG31999	FBgn0039714	CG7816	FBgn0034095	CG15701	FBgn0004903	Rb97D	FBgn0038830	CG17272	FBgn0010812	unc-45	FBgn0036762	CG7430	FBgn0050093	CG30093
FBgn0024920	Ts	FBgn0039861	pasha	FBgn0013762	Cdk5	FBgn0052533	CG32533	FBgn0030063	CG1789	FBgn0261602	RpL8	FBgn0033633	CG7759	FBgn0039838	CG3669	FBgn0004370	Ptp10D	FBgn0052412	QC	FBgn0259099	DCX-EMAP	FBgn0031948	CG7149	FBgn0039407	CG14544	FBgn0262467	Scox	FBgn0052191	CG32191	FBgn0034756	Cyp6d2	FBgn0031937	CG13795	FBgn0024804	Dbp80	FBgn0032305	CG6700	FBgn0030809	CG9086	FBgn0010258	Rbp4	FBgn0085503	CG40625	FBgn0037789	CG6208	FBgn0016120	ATPsyn-d	FBgn0036830	CG14077
FBgn0033935	Sin1	FBgn0036920	CG8004	FBgn0035136	CG6905	FBgn0086444	l(2)37Cb	FBgn0033548	CG7637	FBgn0050441	CG30441	FBgn0015797	Rab6	FBgn0033791	Drl-2	FBgn0030997	CG7990	FBgn0029962	CG1402	FBgn0023179	amon	FBgn0083959	trpm	FBgn0035189	CG9119	FBgn0051454	CG31454	FBgn0028833	Dak1	FBgn0033065	Cyp6w1	FBgn0041630	Hexo1	FBgn0034005	alphaPS4	FBgn0038321	CG6218	FBgn0036058	CG6707	FBgn0020309	crol	FBgn0051559	CG31559	FBgn0038925	Cchl	FBgn0037391	CG2017	FBgn0030951	CG6873
FBgn0038464	CG16941	FBgn0036039	Naa60	FBgn0014189	Hel25E	FBgn0039186	CG5746	FBgn0013750	Arf51F	FBgn0000100	RpLP0	FBgn0038881	CG16791	FBgn0031488	CG17265	FBgn0036927	CG7433	FBgn0033791	Drl-2	FBgn0039595	AR-2	FBgn0033494	KCNQ	FBgn0063667	CG32335	FBgn0051259	CG31259	FBgn0037057	CG10512	FBgn0015038	Cyp9b1	FBgn0036821	CG3961	FBgn0052672	Atg8a	FBgn0035877	CG7083	FBgn0027836	Dgp-1	FBgn0025802	Sbf	FBgn0029662	CG12206	FBgn0036497	ran-like	FBgn0003071	Pfk	FBgn0032291	CG17118
FBgn0038675	CG6013	FBgn0036487	Prp31	FBgn0039505	CG5934	FBgn0030500	Ndc80	FBgn0039303	CG11857	FBgn0024244	drm	FBgn0039113	CG10217	FBgn0052532	CG32532	FBgn0043550	Tsp68C	FBgn0259099	DCX-EMAP	FBgn0031518	CG3277	FBgn0038072	CG6225	FBgn0031148	Cbs	FBgn0036990	mRpL15	FBgn0033079	Fmo-2	FBgn0015039	Cyp9b2	FBgn0037684	CG8129	FBgn0032467	CG9934	FBgn0038651	CG14299	FBgn0036402	CG6650	FBgn0052758	CG32758	FBgn0039054	CG13830	FBgn0037818	CG6465	FBgn0010612	l(2)06225	FBgn0051703	CG31703
FBgn0015546	spel1	FBgn0030974	CG7358	FBgn0086736	GckIII	FBgn0026149	BCL7-like	FBgn0002736	mago	FBgn0031497	CG17259	FBgn0051721	Trim9	FBgn0030701	CG16952	FBgn0027491	Cdk5alpha	FBgn0052532	CG32532	FBgn0039053	CG6738	FBgn0031069	Pmp70	FBgn0013325	RpL11	FBgn0033357	Tom7	FBgn0039591	CG9988	FBgn0038037	Cyp9f2	FBgn0011296	l(2)efl	FBgn0036030	CG6767	FBgn0032864	CG2493	FBgn0003267	ro	FBgn0028961	AlstR	FBgn0010470	Fkbp13	FBgn0037754	CG8500	FBgn0003380	Sh	FBgn0040356	CG12498
FBgn0035110	thoc7	FBgn0033891	CG8067	FBgn0029088	disp	FBgn0030738	CG9915	FBgn0036428	CG9238	FBgn0037240	Cont	FBgn0039874	CG2135	FBgn0259179	CG42284	FBgn0010014	CanB	FBgn0259179	CG42284	FBgn0039051	CG17109	FBgn0039890	CG2316	FBgn0037061	CG12975	FBgn0039305	CG11858	FBgn0036337	CG11255	FBgn0015040	Cyp9c1	FBgn0031037	CG14207	FBgn0031589	CG3714	FBgn0035173	CG13907	FBgn0034913	usnp	FBgn0040964	CG18661	FBgn0033668	CG13188	FBgn0031228	CG11455	FBgn0033635	CG7777	FBgn0037845	CG14694
FBgn0032340	Ge-1	FBgn0260780	wisp	FBgn0036277	CG10418	FBgn0001197	His2Av	FBgn0003345	sd	FBgn0002525	Lam	FBgn0039936	CG11148	FBgn0038603	PKD	FBgn0035521	VhaM9.7-a	FBgn0011202	dia	FBgn0053513	Nmdar2	FBgn0086347	Myo31DF	FBgn0035630	CG10576	FBgn0038678	mRpL55	FBgn0032790	CG10194	FBgn0028940	Cyp28a5	FBgn0034197	Cda9	FBgn0033698	CG8858	FBgn0040297	Nhe2	FBgn0040383	CG5254	FBgn0034510	CG13426	FBgn0028984	Spn5	FBgn0050325	CG30325	FBgn0004169	up	FBgn0036862	Gbs-76A
FBgn0031799	Pez	FBgn0036118	blos2	FBgn0032250	holn1	FBgn0035626	lin-28	FBgn0038585	CG7993	FBgn0039213	atl	FBgn0002922	nau	FBgn0025641	DAAM	FBgn0261859	CG42788	FBgn0004509	Fur1	FBgn0010399	Nmdar1	FBgn0033109	coro	FBgn0025117	und	FBgn0260960	Baldspot	FBgn0030678	CG11679	FBgn0038006	Cyp313a2	FBgn0259741	CG42395	FBgn0000565	Eip71CD	FBgn0020370	TppII	FBgn0003744	trc	FBgn0037754	CG8500	FBgn0034956	CG4324	FBgn0032749	Phlpp	FBgn0039358	CG5028	FBgn0053092	P5CDh2
FBgn0023171	rnh1	FBgn0031696	Bub1	FBgn0000413	da	FBgn0261641	CG42724	FBgn0039531	CG5611	FBgn0000482	dor	FBgn0032683	kon	FBgn0260963		FBgn0034870	CG13559	FBgn0031518	CG3277	FBgn0050502	fa2h	FBgn0035499	Chd64	FBgn0031777	CG9154	FBgn0034259	P32	FBgn0017482	T3dh	FBgn0038005	Cyp313a5	FBgn0085261	CG34232	FBgn0037231	vps24	FBgn0086372	lap	FBgn0038065	Snx3	FBgn0034133	CG7813	FBgn0032680	Ntf-2r	FBgn0003380	Sh	FBgn0038922	CG6439	FBgn0036403	CG6661
FBgn0023522	CG11596	FBgn0025458		FBgn0003525	stg	FBgn0031492	CG3542	FBgn0040020	MED21	FBgn0037351	RpL13A	FBgn0037108	CG11306	FBgn0016694	Pdp1	FBgn0033257	CG8713	FBgn0039053	CG6738	FBgn0014467	CrebB-17A	FBgn0051454	CG31454	FBgn0002174	l(2)tid	FBgn0035334	CG8993	FBgn0004654	Pgd	FBgn0037601	Cyp313b1	FBgn0035964	Dhpr	FBgn0034110	Atg9	FBgn0026150	ApepP	FBgn0260744	Tango9	FBgn0027836	Dgp-1	FBgn0051999	CG31999	FBgn0031660	mRpL28	FBgn0039492	CG6051	FBgn0037744	CG8417
FBgn0037252	CG14650	FBgn0052708	CG32708	FBgn0259483	Mob4	FBgn0016978	snRNP-U1-70K	FBgn0005561	sv	FBgn0039765	mRpS18C	FBgn0058045	CG40045	FBgn0259712	CG42366	FBgn0038621	CG10864	FBgn0053513	Nmdar2	FBgn0027525	CG7686	FBgn0038919	CG17843	FBgn0034893	mRpL43	FBgn0030239	CG17333	FBgn0037801	CG3999	FBgn0035790	Cyp316a1	FBgn0035300	CG1139	FBgn0051183	CG31183	FBgn0029093	cathD	FBgn0002306	sas	FBgn0004372	aly	FBgn0020294	ko	FBgn0004169	up	FBgn0027654	jdp	FBgn0021953	Fatp
FBgn0029818	CG3033	FBgn0010341	Cdc42	FBgn0031047	Rcd-1	FBgn0032030	Wdr82	FBgn0027607	CG8230	FBgn0026873	MED18	FBgn0037552	CG7800	FBgn0031730	CG7236	FBgn0259242	CG42340	FBgn0010399	Nmdar1	FBgn0034885	CG4019	FBgn0016920	nompC	FBgn0026372	RpL23A	FBgn0039854	CG1635	FBgn0027610	Dic1	FBgn0030367	Cyp311a1	FBgn0028514	CG4793	FBgn0086378	Alg-2	FBgn0003162	Pu	FBgn0038325	CG6194	FBgn0036402	CG6650	FBgn0032210	CYLD	FBgn0039358	CG5028	FBgn0038890	CG7956	FBgn0050194	CG30194
FBgn0034908	CG5543	FBgn0010333	Rac1	FBgn0024555	flfl	FBgn0039183	Dis3	FBgn0004635	rho	FBgn0031600	CG3652	FBgn0005631	robo	FBgn0010611	Hmgs	FBgn0035192	CG9194	FBgn0259109		FBgn0034884	CG17662	FBgn0033246	ACC	FBgn0010292	bys	FBgn0037709	CG8199	FBgn0039674	CG1907	FBgn0038312	CG4334	FBgn0031389	CG4259	FBgn0065032	Arpc3B	FBgn0035499	Chd64	FBgn0004368	Ptp4E	FBgn0085421	Epac	FBgn0262477	FoxP	FBgn0038922	CG6439	FBgn0039561	mfrn	FBgn0034904	CG15800
FBgn0033737	Nup54	FBgn0039532	Mtl	FBgn0052533	CG32533	FBgn0003275	RpII18	FBgn0032651	Oli	FBgn0013998	Nsf2	FBgn0032904	Mtp	FBgn0050502	fa2h	FBgn0038042	Scgbeta	FBgn0050502	fa2h	FBgn0033502	CG12910	FBgn0040211	hgo	FBgn0034360	CG10927	FBgn0039827	CG1544	FBgn0037714	CG9396	FBgn0050016	CG30016	FBgn0032639	CG18563	FBgn0015221	Fer2LCH	FBgn0052675	Tango5	FBgn0031412	CG16995	FBgn0037215	CG12582	FBgn0086675	fne	FBgn0051475	CG31475	FBgn0033876	synaptogyrin	FBgn0034863	skpF
FBgn0024558	Dph5	FBgn0032409	Ced-12	FBgn0086444	l(2)37Cb	FBgn0029755	Sas10	FBgn0022787	Hel89B	FBgn0032407	Pex19	FBgn0037061	CG12975	FBgn0038852	CG7056	FBgn0004624		FBgn0014467	CrebB-17A	FBgn0025687	LKR	FBgn0036875	CG9449	FBgn0038811	CG4159	FBgn0038723	CG6195	FBgn0039537	CG5590	FBgn0033294	Mal-A4	FBgn0031471	CG3117	FBgn0030756	CG9903	FBgn0039844	CG1607	FBgn0038198	Npc2b	FBgn0038861	CG7009	FBgn0032013	Scgalpha	FBgn0038737	CG11447	FBgn0004888	Scsalpha	FBgn0026176	skpB
FBgn0051716	Cnot4	FBgn0036696	CG14057	FBgn0030500	Ndc80	FBgn0011764	Dsp1	FBgn0002924	ncd	FBgn0260441	RpS12	FBgn0040079	pkaap	FBgn0025682	scf	FBgn0086911	rg	FBgn0034883	CG17664	FBgn0033876	synaptogyrin	FBgn0039856	CG1774	FBgn0010621	Cct5	FBgn0039838	CG3669	FBgn0033981	Cyp6a21	FBgn0050359	Mal-A5	FBgn0035496	CG14990	FBgn0033050	Pngl	FBgn0036974	eRF1	FBgn0031381	Npc2a	FBgn0032221	CG5375	FBgn0051314	Neu3	FBgn0037275	CG14655	FBgn0005626	ple	FBgn0262535	CG43089
FBgn0039861	pasha	FBgn0039639	CG14512	FBgn0026149	BCL7-like	FBgn0031832	CG9596	FBgn0041087	wun2	FBgn0031361	CG17652	FBgn0261380	mRpL37	FBgn0033502	CG12910	FBgn0035815	Snmp2	FBgn0052528	CG32528	FBgn0000037	mAcR-60C	FBgn0033958	CG12858	FBgn0030067	Rbm13	FBgn0038613	Vha100-4	FBgn0000473	Cyp6a2	FBgn0034289	CG10910	FBgn0036805	Chmp1	FBgn0030809	CG9086	FBgn0050392	CG30392	FBgn0039430	CG5455	FBgn0032506	CG9395	FBgn0259110	mmd	FBgn0032221	CG5375	FBgn0038197	foxo	FBgn0050157	CG30157
FBgn0036920	CG8004	FBgn0011224	heph	FBgn0030738	CG9915	FBgn0038552	CG18012	FBgn0033507	CG12909	FBgn0029897	RpL17	FBgn0032236	mRpS7	FBgn0020236	ATPCL	FBgn0031530	pgant2	FBgn0033911	VGAT	FBgn0035187	Trh	FBgn0013334	Sap47	FBgn0026418	Hsc70Cb	FBgn0032373	Vha100-5	FBgn0039519	Cyp6a18	FBgn0052495	CG32495	FBgn0040493	grsm	FBgn0020369	Pros45	FBgn0024804	Dbp80	FBgn0032017	CG7810	FBgn0030455	CG4318	FBgn0035720	CG10077	FBgn0027654	jdp	FBgn0003360	sesB	FBgn0021967	Pdsw
FBgn0000057	adp	FBgn0035136	CG6905	FBgn0051368	CG31368	FBgn0000377	crn	FBgn0039113	CG10217	FBgn0025724	beta'Cop	FBgn0026262	bip2	FBgn0260934	par-1	FBgn0028743	CG5036	FBgn0033502	CG12910	FBgn0028401	Snap24	FBgn0250911	CG42245	FBgn0040297	Nhe2	FBgn0044030	mRpS14	FBgn0013772	Cyp6a8	FBgn0030882	GS	FBgn0038053	CG18549	FBgn0039788	Rpt6R	FBgn0003328	scb	FBgn0033756	CG17760	FBgn0034202	CG17287	FBgn0031926	CG6739	FBgn0038871	CG3337	FBgn0086784	stmA	FBgn0051802	CG31802
FBgn0036039	Naa60	FBgn0014189	Hel25E	FBgn0052442	CG32442	FBgn0027951	MTA1-like	FBgn0037551	Gie	FBgn0033521	CG12896	FBgn0021795	Tapdelta	FBgn0028401	Snap24	FBgn0024941	RSG7	FBgn0025687	LKR	FBgn0038197	foxo	FBgn0029962	CG1402	FBgn0011769	Fdxh	FBgn0035909	ergic53	FBgn0015040	Cyp9c1	FBgn0031937	CG13795	FBgn0053013	CR33013	FBgn0039595	AR-2	FBgn0034005	alphaPS4	FBgn0039927	CG11155	FBgn0040383	CG5254	FBgn0261260	mgl	FBgn0030407	CG2543	FBgn0031478	CG8814	FBgn0053098	CG33098
FBgn0039589	CG9986	FBgn0035001	slik	FBgn0032244	RfC3	FBgn0024244	drm	FBgn0002922	nau	FBgn0033518	Prx2540-2	FBgn0016059	Sema-1b	FBgn0259823	CG42404	FBgn0086913	Rab26	FBgn0051719	RluA-1	FBgn0037354	CG12171	FBgn0038613	Vha100-4	FBgn0032595	CG17996	FBgn0037607	CG8036	FBgn0031689	Cyp28d1	FBgn0037743	CG8412	FBgn0050277	Oatp58Da	FBgn0027844	CAH1	FBgn0052672	Atg8a	FBgn0036768	CG7402	FBgn0035470	CG14980	FBgn0040629	CG18673	FBgn0062442	CG1458	FBgn0020372	TM4SF	FBgn0037938	CG14717
FBgn0030869	Socs16D	FBgn0037780	CG3925	FBgn0001197	His2Av	FBgn0002525	Lam	FBgn0032683	kon	FBgn0031873	Gas41	FBgn0033551	CG7222	FBgn0260432		FBgn0034943	Fmo-1	FBgn0033876	synaptogyrin	FBgn0040349	CG3699	FBgn0028670	Vha100-2	FBgn0033494	KCNQ	FBgn0030026	sni	FBgn0038076	Cyp313a4	FBgn0037684	CG8129	FBgn0030029	CG15343	FBgn0035540	Syx17	FBgn0032467	CG9934	FBgn0033763	CG8646	FBgn0026063	KP78b	FBgn0029962	CG1402	FBgn0034202	CG17287	FBgn0037613	Cks85A	FBgn0051115	CG31115
FBgn0011761	dhd	FBgn0029088	disp	FBgn0014009	Rab2	FBgn0039004	Nup133	FBgn0063667	CG32335	FBgn0032987	RpL21	FBgn0002022	Catsup	FBgn0020912	Ptx1	FBgn0038366	CG4576	FBgn0034644	CG10082	FBgn0032075	Tsp29Fb	FBgn0032373	Vha100-5	FBgn0036990	mRpL15	FBgn0031662	CG3792	FBgn0030369	Cyp318a1	FBgn0011296	l(2)efl	FBgn0041194	Prat2	FBgn0024252		FBgn0036030	CG6767	FBgn0042175	CG18858	FBgn0002306	sas	FBgn0052698	CG32698	FBgn0037546	CG7918	FBgn0035032	CG4692	FBgn0260953	CG42585
FBgn0033891	CG8067	FBgn0036277	CG10418	FBgn0040228	dyn-p25	FBgn0034598	CG4266	FBgn0028744	CG5033	FBgn0069242	eca	FBgn0033017	CG10465	FBgn0000061	al	FBgn0038876	CG5919	FBgn0000037	mAcR-60C	FBgn0001122	G-oalpha47A	FBgn0058178	CG40178	FBgn0034968	RpL12	FBgn0051229	CG31229	FBgn0036211	CG5946	FBgn0025837	CG17636	FBgn0052557	CG32557	FBgn0028693	Rpn12	FBgn0036877	CG9452	FBgn0051683	CG31683	FBgn0053196	dp	FBgn0000560	eg	FBgn0011288	Snap25	FBgn0019960	CG6455	FBgn0028531	CG15286
FBgn0036671	CG9951	FBgn0032250	holn1	FBgn0030858	IntS2	FBgn0000482	dor	FBgn0037108	CG11306	FBgn0010380	Bap	FBgn0261697	tectonic	FBgn0004370	Ptp10D	FBgn0034484	CG11044	FBgn0038659	endoA	FBgn0052280	CG32280	FBgn0011202	dia	FBgn0033357	Tom7	FBgn0034001	mRpL41	FBgn0050016	CG30016	FBgn0034197	Cda9	FBgn0033582	CG9084	FBgn0043362	bchs	FBgn0036813	Aut1	FBgn0000099	ap	FBgn0031283	CG15880	FBgn0058178	CG40178	FBgn0033031	CG8245	FBgn0050054	CG30054	FBgn0259737	CG42391
FBgn0033401	CG1968	FBgn0030944	CG6617	FBgn0261641	CG42724	FBgn0040283	SMC1	FBgn0024371	E2f2	FBgn0033548	CG7637	FBgn0022740	HLH54F	FBgn0010391	Gtp-bp	FBgn0038070	CG6753	FBgn0035187	Trh	FBgn0259242	CG42340	FBgn0023179	amon	FBgn0032919	CG9253	FBgn0032799	CG10166	FBgn0038519	Prx3	FBgn0259741	CG42395	FBgn0035811	CG12262	FBgn0052626	CG32626	FBgn0033698	CG8858	FBgn0261983	l(2)gd1	FBgn0032943	Tsp39D	FBgn0039938	Sox102F	FBgn0036985	zye	FBgn0004435	Galpha49B	FBgn0037146	CG7470
FBgn0030581	CG14408	FBgn0002673	twe	FBgn0031492	CG3542	FBgn0052438	Smc5	FBgn0030990	CG7556	FBgn0013750	Arf51F	FBgn0262124	uex	FBgn0030375	CG11356	FBgn0023496	Lip1	FBgn0028401	Snap24	FBgn0260971	CG42594	FBgn0016694	Pdp1	FBgn0002778	mnd	FBgn0039049	CG6726	FBgn0002571	Mal-A3	FBgn0052068	CG32068	FBgn0036454	CG17839	FBgn0033962	CG10153	FBgn0000565	Eip71CD	FBgn0020647	KrT95D	FBgn0039137	CG13604	FBgn0031488	CG17265	FBgn0020372	TM4SF	FBgn0053639	CG33639	FBgn0038175	CG9602
FBgn0036059	nudE	FBgn0031047	Rcd-1	FBgn0033901	O-fut1	FBgn0014163	fax	FBgn0035099	CG6845	FBgn0039303	CG11857	FBgn0032821	CdGAPr	FBgn0043550	Tsp68C	FBgn0051871	CG31871	FBgn0259823	CG42404	FBgn0004168	5-HT1A	FBgn0037789	CG6208	FBgn0039305	CG11858	FBgn0030305	CG1749	FBgn0003965	v	FBgn0085261	CG34232	FBgn0000455	Dip-C	FBgn0010225	Gel	FBgn0037231	vps24	FBgn0035207	CG9153	FBgn0034627	EfSec	FBgn0036496	CG7804	FBgn0032943	Tsp39D	FBgn0037001	CG6020	FBgn0036706	CG6485
FBgn0030789	Rrp45	FBgn0024555	flfl	FBgn0016978	snRNP-U1-70K	FBgn0031375	erm	FBgn0002543	lea	FBgn0002736	mago	FBgn0038421	CG17931	FBgn0261859	CG42788	FBgn0035879	CG7112	FBgn0038197	foxo	FBgn0004573	5-HT7	FBgn0028961	AlstR	FBgn0004867	RpS2	FBgn0031049	Sec61gamma	FBgn0034289	CG10910	FBgn0039045	CG17119	FBgn0035154	CG3344	FBgn0028686	Rpt3	FBgn0024187	syd	FBgn0034943	Fmo-1	FBgn0032717	CG10600	FBgn0260943	Rbp6	FBgn0037613	Cks85A	FBgn0035404	CG12079	FBgn0030853	CG5703
FBgn0260780	wisp	FBgn0031459	CG2862	FBgn0032030	Wdr82	FBgn0002573	sens	FBgn0005631	robo	FBgn0040340	TRAM	FBgn0038830	CG17272	FBgn0023023	CRMP	FBgn0033443	CG1698	FBgn0020912	Ptx1	FBgn0011582	DopR	FBgn0039595	AR-2	FBgn0038678	mRpL55	FBgn0010611	Hmgs	FBgn0037100	capaR	FBgn0003141	pr	FBgn0033809	CG4630	FBgn0035438	PHGPx	FBgn0003256	rl	FBgn0038504	Sur-8	FBgn0028887	CG3491	FBgn0038603	PKD	FBgn0010014	CanB	FBgn0026376	Rgl	FBgn0027554	CG8042
FBgn0260049	flr	FBgn0026149	BCL7-like	FBgn0030851	CG8326	FBgn0036104	CG6418	FBgn0030806	CG13001	FBgn0035374	mRpS35	FBgn0058191	CG40191	FBgn0034870	CG13559	FBgn0038814	CG15923	FBgn0053196	dp	FBgn0025709	CG8083	FBgn0031518	CG3277	FBgn0034259	P32	FBgn0027580	CG1516	FBgn0038326	CG5044	FBgn0001092	Gapdh2	FBgn0035515	CG14997	FBgn0032216	CG5384	FBgn0050290	Ppcdc	FBgn0038366	CG4576	FBgn0005410	sno	FBgn0260963		FBgn0032720	mRpL13	FBgn0030839	CG5613	FBgn0042627	v(2)k05816
FBgn0031696	Bub1	FBgn0005777	PpD3	FBgn0039183	Dis3	FBgn0026873	MED18	FBgn0037061	CG12975	FBgn0003345	sd	FBgn0052407	CG32407	FBgn0038621	CG10864	FBgn0041105	nerfin-2	FBgn0030997	CG7990	FBgn0041605	cpx	FBgn0039051	CG17109	FBgn0039790	CG2246	FBgn0031660	mRpL28	FBgn0030882	GS	FBgn0028514	CG4793	FBgn0039543	CG12428	FBgn0040064	yip2	FBgn0051314	Neu3	FBgn0037313	CG1161	FBgn0261953	AP-2	FBgn0029920	CR4575	FBgn0034940	CG16787	FBgn0260004	Snmp1	FBgn0014396	tim
FBgn0039532	Mtl	FBgn0030738	CG9915	FBgn0035831	CG8038	FBgn0038827	Fancd2	FBgn0033491	CG18011	FBgn0038039	CG5196	FBgn0033095	CG3409	FBgn0035192	CG9194	FBgn0002526	LanA	FBgn0037000	CG5130	FBgn0031294	IA-2	FBgn0053513	Nmdar2	FBgn0035722	CG10075	FBgn0011016	SsRbeta	FBgn0030558	CG1461	FBgn0031389	CG4259	FBgn0011672	Mvl	FBgn0031267	Ipk2	FBgn0261274	Ero1L	FBgn0030693	CG8974	FBgn0000497	ds	FBgn0010812	unc-45	FBgn0017429	CG5989	FBgn0262559	Mdh2	FBgn0031436	CG3214
FBgn0013762	Cdk5	FBgn0034491	CG11055	FBgn0003275	RpII18	FBgn0034231	Apc10	FBgn0016059	Sema-1b	FBgn0039531	CG5611	FBgn0053977	CG33977	FBgn0261509	haf	FBgn0039908	Asator	FBgn0027491	Cdk5alpha	FBgn0053517	D2R	FBgn0010399	Nmdar1	FBgn0038903	RpI12	FBgn0040234	c12.2	FBgn0041180	TepIV	FBgn0032639	CG18563	FBgn0033093	CG3270	FBgn0260744	Tango9	FBgn0033188	CG1600	FBgn0034744	Vps20	FBgn0039916	CG9935	FBgn0031730	CG7236	FBgn0003423	slgA	FBgn0039681	CG7582	FBgn0037004	CG17637
FBgn0039639	CG14512	FBgn0029764		FBgn0021818	cnk	FBgn0014343	mirr	FBgn0033551	CG7222	FBgn0050423	CG30423	FBgn0031571	CG3921	FBgn0038042	Scgbeta	FBgn0259170	alpha-Man-I	FBgn0010014	CanB	FBgn0032187	CG4839	FBgn0050502	fa2h	FBgn0040211	hgo	FBgn0038871	CG3337	FBgn0037743	CG8412	FBgn0031471	CG3117	FBgn0085520	CG40801	FBgn0053265	Muc68E	FBgn0250843	Pros35	FBgn0031971	CG7224	FBgn0005677	dac	FBgn0028961	AlstR	FBgn0053639	CG33639	FBgn0085347		FBgn0037003	CG18281
FBgn0011774	Irbp	FBgn0052442	CG32442	FBgn0011764	Dsp1	FBgn0037478	CG2656	FBgn0036538	CG15715	FBgn0005561	sv	FBgn0259100		FBgn0086911	rg	FBgn0033978	Cyp6a23	FBgn0261859	CG42788	FBgn0000721	for	FBgn0027525	CG7686	FBgn0050118	CG30118	FBgn0002031	l(2)37Cc	FBgn0038400	CG5903	FBgn0035496	CG14990	FBgn0020513	ade5	FBgn0031298	Atg4	FBgn0037788	CG3940	FBgn0013948		FBgn0028499	CG7985	FBgn0036497	ran-like	FBgn0039916	CG9935	FBgn0022709	Adk1	FBgn0037005	CG5078
FBgn0023512	eIF2B-epsilon	FBgn0001197	His2Av	FBgn0038552	CG18012	FBgn0034802	CG3800	FBgn0036537	CG18081	FBgn0003129	Poxm	FBgn0023529	CG2918	FBgn0039681	CG7582	FBgn0001078	ftz-f1	FBgn0052280	CG32280	FBgn0028743	CG5036	FBgn0032221	CG5375	FBgn0030239	CG17333	FBgn0033907	mRpS16	FBgn0038795	CG4335	FBgn0050043	CG30043	FBgn0037817	Cyp12e1	FBgn0031412	CG16995	FBgn0052698	CG32698	FBgn0034990	CG11406	FBgn0036327	CG10748	FBgn0034510	CG13426	FBgn0031634	Ir25a	FBgn0032083	CG9541	FBgn0033734	CG8520
FBgn0030037	CG12125	FBgn0040228	dyn-p25	FBgn0000377	crn	FBgn0031873	Gas41	FBgn0034264	CG10933	FBgn0027607	CG8230	FBgn0003460	so	FBgn0031530	pgant2	FBgn0259150	CG42265	FBgn0033257	CG8713	FBgn0024941	RSG7	FBgn0025687	LKR	FBgn0003279	RpL4	FBgn0031877	CG10399	FBgn0061356	CG18003	FBgn0050047	CG30047	FBgn0038681	Cyp12a4	FBgn0032074	Tsp29Fa	FBgn0086378	Alg-2	FBgn0003209	raw	FBgn0036848	CG10424	FBgn0039147	CG10694	FBgn0004624		FBgn0000442	Pkg21D	FBgn0031026	CG12231
FBgn0029088	disp	FBgn0031492	CG3542	FBgn0027951	MTA1-like	FBgn0050431	CG30431	FBgn0029714	CG3527	FBgn0034361	mRpS28	FBgn0003896	tup	FBgn0024183	vig	FBgn0036274	CG4328	FBgn0259242	CG42340	FBgn0259927	CG42450	FBgn0035083	Tina-1	FBgn0041707	7B2	FBgn0029969	CG10932	FBgn0037513	pyd3	FBgn0033720	CG13160	FBgn0003388	shd	FBgn0039241	CG11089	FBgn0065032	Arpc3B	FBgn0035879	CG7112	FBgn0034753	CG2852	FBgn0035016	CG4612	FBgn0037796	CG12814	FBgn0030733	CG3560	FBgn0000084	AnnX
FBgn0029117	Surf1	FBgn0033901	O-fut1	FBgn0038816	Lrrk	FBgn0038454	CG10324	FBgn0050122	CG30122	FBgn0064766	CG7600	FBgn0026411	Lim1	FBgn0032800	CG10137	FBgn0027341	Gfat1	FBgn0260971	CG42594	FBgn0037057	CG10512	FBgn0033876	synaptogyrin	FBgn0030403	CG1824	FBgn0020236	ATPCL	FBgn0030482	CG1673	FBgn0053012	CG33012	FBgn0036318	Wbp2	FBgn0025693	CG11163	FBgn0026619	Taz	FBgn0033443	CG1698	FBgn0000099	ap	FBgn0037754	CG8500	FBgn0041605	cpx	FBgn0033558	CG12344	FBgn0030370	CG1950
FBgn0067102	GlcT-1	FBgn0003371	sgg	FBgn0002525	Lam	FBgn0038046	CG5641	FBgn0022740	HLH54F	FBgn0004635	rho	FBgn0051559	CG31559	FBgn0261800	LanB1	FBgn0000036	nAcRalpha-96Aa	FBgn0035192	CG9194	FBgn0086913	Rab26	FBgn0000037	mAcR-60C	FBgn0033958	CG12858	FBgn0023537	CG17896	FBgn0020907	Scp2	FBgn0034437	CG10051	FBgn0039817	CG15553	FBgn0037000	CG5130	FBgn0002069	Aats-asp	FBgn0011277	HLH4C	FBgn0020647	KrT95D	FBgn0034133	CG7813	FBgn0035272	mRpL46	FBgn0036727	CG7589	FBgn0051730	CG31730
FBgn0030944	CG6617	FBgn0016978	snRNP-U1-70K	FBgn0039004	Nup133	FBgn0051184	LSm3	FBgn0082598	akirin	FBgn0014868	Ost48	FBgn0025725	alphaCop	FBgn0037838	CG4089	FBgn0016047	nompA	FBgn0038042	Scgbeta	FBgn0051191	CG31191	FBgn0037546	CG7918	FBgn0039417	CG6073	FBgn0035588	CG10672	FBgn0025837	CG17636	FBgn0034406	Jheh3	FBgn0050345	CG30345	FBgn0037623	CG9801	FBgn0015221	Fer2LCH	FBgn0033052	SCAP	FBgn0033431	CG1827	FBgn0050325	CG30325	FBgn0031414	eys	FBgn0031021	CG12203	FBgn0051851	CG31851
FBgn0000413	da	FBgn0032030	Wdr82	FBgn0034598	CG4266	FBgn0000147	aur	FBgn0032821	CdGAPr	FBgn0024994	Csat	FBgn0033754	Ak6	FBgn0038876	CG5919	FBgn0033739	Dyb	FBgn0004168	5-HT1A	FBgn0036934	sNPF-R	FBgn0040780	CG12821	FBgn0037709	CG8199	FBgn0029648	CG3603	FBgn0036359	CG14105	FBgn0033543	CG12338	FBgn0032704	Jwa	FBgn0000052	ade2	FBgn0250746	Prosbeta7	FBgn0015296	Shc	FBgn0051742	CG31742	FBgn0031941	CG7211	FBgn0036882	CG9279	FBgn0035888	CG7120	FBgn0017566	ND75
FBgn0002673	twe	FBgn0030851	CG8326	FBgn0001280	janA	FBgn0034722	Rtf1	FBgn0036501	CG7272	FBgn0032651	Oli	FBgn0024733	RpL10	FBgn0033166	Eaf	FBgn0027358	Tim9b	FBgn0004573	5-HT7	FBgn0037408	NPFR1	FBgn0038659	endoA	FBgn0259110	mmd	FBgn0051548	CG31548	FBgn0001098	Gdh	FBgn0036262	CG6910	FBgn0052249	CG32249	FBgn0033756	CG17760	FBgn0052758	CG32758	FBgn0039061	Ir	FBgn0035207	CG9153	FBgn0037911	CG10898	FBgn0051145	CG31145	FBgn0034645	CG10320	FBgn0000409	Cyt-c-p
FBgn0003525	stg	FBgn0025549	unc-119	FBgn0040283	SMC1	FBgn0033548	CG7637	FBgn0034360	CG10927	FBgn0000181	bic	FBgn0010470	Fkbp13	FBgn0085409	CG34380	FBgn0038312	CG4334	FBgn0037796	CG12814	FBgn0003396	shn	FBgn0035187	Trh	FBgn0261995	CG42813	FBgn0040349	CG3699	FBgn0004117	Tm2	FBgn0030029	CG15343	FBgn0051496	CG31496	FBgn0036573		FBgn0033050	Pngl	FBgn0037612	CG8112	FBgn0038870	Oga	FBgn0085421	Epac	FBgn0000273	Pka-C1	FBgn0034484	CG11044	FBgn0086907	Cyt-c-d
FBgn0037022	CG11396	FBgn0040230	dbo	FBgn0030208	PPP4R2r	FBgn0031266	CG2807	FBgn0038811	CG4159	FBgn0020766	Aats-phe	FBgn0032470	CG5142	FBgn0036825	RpL26	FBgn0039530	Tusp	FBgn0086911	rg	FBgn0031116	CG1695	FBgn0037354	CG12171	FBgn0039827	CG1544	FBgn0016687	Nurf-38	FBgn0004363	porin	FBgn0031821	CG9542	FBgn0027601	pdgy	FBgn0261396	Rpn3	FBgn0034095	CG15701	FBgn0027572	CG5009	FBgn0038090	CG10909	FBgn0051475	CG31475	FBgn0037529	mRpS9	FBgn0001145	Gs2	FBgn0037989	CG14741
FBgn0051852	Tap42	FBgn0003275	RpII18	FBgn0052438	Smc5	FBgn0039303	CG11857	FBgn0033095	CG3409	FBgn0033633	CG7759	FBgn0046706	Haspin	FBgn0260966		FBgn0051729	CG31729	FBgn0035815	Snmp2	FBgn0052506	CG32506	FBgn0030997	CG7990	FBgn0004465	Su(P)	FBgn0036927	CG7433	FBgn0260653	serp	FBgn0050022	CG30022	FBgn0030443	CG12715	FBgn0039927	CG11155	FBgn0030809	CG9086	FBgn0039006	Cyp6d4	FBgn0037802	Sirt6	FBgn0003187	qua	FBgn0032135	GlcAT-S	FBgn0032266	CG18302	FBgn0035355	CG16985
FBgn0035060	Eps-15	FBgn0021818	cnk	FBgn0014163	fax	FBgn0002736	mago	FBgn0259100		FBgn0036282	Smyd4	FBgn0053276	CG33276	FBgn0031639	mRpS2	FBgn0040348	CG3703	FBgn0031530	pgant2	FBgn0038832	CG15695	FBgn0032075	Tsp29Fb	FBgn0261609	eIF-2alpha	FBgn0037102	CG7172	FBgn0034197	Cda9	FBgn0033582	CG9084	FBgn0036843	CG6812	FBgn0040396	CG3939	FBgn0020369	Pros45	FBgn0033775	Cyp9h1	FBgn0037313	CG1161	FBgn0037275	CG14655	FBgn0000557	Ef1alpha100E	FBgn0036756	cln3	FBgn0035356	CG16986
FBgn0031047	Rcd-1	FBgn0035848	CG7979	FBgn0031375	erm	FBgn0035713	CG10107	FBgn0003460	so	FBgn0015797	Rab6	FBgn0052590	CG32590	FBgn0038070	CG6753	FBgn0259818	CG42399	FBgn0032083	CG9541	FBgn0035265	CG18173	FBgn0032699	CG10383	FBgn0038723	CG6195	FBgn0031824	CG9547	FBgn0013308	Odc2	FBgn0035811	CG12262	FBgn0033717	CG8839	FBgn0041191	Rheb	FBgn0039788	Rpt6R	FBgn0015040	Cyp9c1	FBgn0259735	CG42389	FBgn0032221	CG5375	FBgn0085254	CG34225	FBgn0033443	CG1698	FBgn0032511	CG9306
FBgn0024555	flfl	FBgn0029755	Sas10	FBgn0036104	CG6418	FBgn0038585	CG7993	FBgn0015721	king-tubby	FBgn0039113	CG10217	FBgn0010395	betaInt-nu	FBgn0023496	Lip1	FBgn0002528	LanB2	FBgn0053517	D2R	FBgn0029105	alpha-catenin-related	FBgn0027491	Cdk5alpha	FBgn0039486	CG6074	FBgn0035911	CG6638	FBgn0052068	CG32068	FBgn0052687	CG32687	FBgn0000053	ade3	FBgn0000099	ap	FBgn0027844	CAH1	FBgn0031432	Cyp309a1	FBgn0011569	can	FBgn0027654	jdp	FBgn0035888	CG7120	FBgn0011211	blw	FBgn0034546	CG13442
FBgn0036691	beg	FBgn0024308		FBgn0030631	CG6227	FBgn0038039	CG5196	FBgn0033169	CG11123	FBgn0038916	dnd	FBgn0034956	CG4324	FBgn0038814	CG15923	FBgn0003965	v	FBgn0000442	Pkg21D	FBgn0004397	Vinc	FBgn0010014	CanB	FBgn0005671	Vha55	FBgn0024556	EfTuM	FBgn0037842	CG6567	FBgn0000455	Dip-C	FBgn0042102	CG18745	FBgn0261983	l(2)gd1	FBgn0035540	Syx17	FBgn0003515	st	FBgn0003396	shn	FBgn0032506	CG9395	FBgn0011206	bol	FBgn0010213	Sod2	FBgn0029877	CG17717
FBgn0032194	CG4901	FBgn0000377	crn	FBgn0026873	MED18	FBgn0039531	CG5611	FBgn0003896	tup	FBgn0037551	Gie	FBgn0028527	CG18507	FBgn0011277	HLH4C	FBgn0039858	CycG	FBgn0260446	GABA-B-R1	FBgn0027538	beta4GalNAcTA	FBgn0028663	VhaM9.7-b	FBgn0039846	CG11337	FBgn0035121	Tudor-SN	FBgn0039068	CG13827	FBgn0036820	CG6852	FBgn0037465	CG1105	FBgn0030791	CG9132	FBgn0025806	Rap2l	FBgn0014427	CG11899	FBgn0008646	E5	FBgn0030407	CG2543	FBgn0034484	CG11044	FBgn0027596	CG10249	FBgn0085503	CG40625
FBgn0041775	tral	FBgn0027951	MTA1-like	FBgn0038827	Fancd2	FBgn0032169	CG4709	FBgn0025725	alphaCop	FBgn0051721	Trim9	FBgn0052281	CG32281	FBgn0050115	GEFmeso	FBgn0041723	rho-5	FBgn0016650	Lgr1	FBgn0259225	Pde1c	FBgn0001122	G-oalpha47A	FBgn0039306	CG11859	FBgn0032720	mRpL13	FBgn0038302	CG4210	FBgn0035154	CG3344	FBgn0037518	CG2641	FBgn0028703	Nhe3	FBgn0036058	CG6707	FBgn0027341	Gfat1	FBgn0051211	CG31211	FBgn0034202	CG17287	FBgn0039915	CG1732	FBgn0037715	CG9399	FBgn0001128	Gpdh
FBgn0045862	btz	FBgn0039004	Nup133	FBgn0034231	Apc10	FBgn0262519	Mi-2	FBgn0033754	Ak6	FBgn0036335	mRpL20	FBgn0027103	sec10	FBgn0041105	nerfin-2	FBgn0085387	shakB	FBgn0028743	CG5036	FBgn0261090	Sytbeta	FBgn0052280	CG32280	FBgn0038613	Vha100-4	FBgn0011336	OstStt3	FBgn0042083	CG3267	FBgn0033809	CG4630	FBgn0032652	CG6870	FBgn0034903	CG9850	FBgn0024252		FBgn0000024	Ace	FBgn0035892	exo70	FBgn0037546	CG7918	FBgn0014859	Hr38	FBgn0013995	Calx	FBgn0034825	CG3215
FBgn0039186	CG5746	FBgn0028685	Rpt4	FBgn0014343	mirr	FBgn0003129	Poxm	FBgn0032816	Nf-YB	FBgn0035107	mri	FBgn0037092	M6	FBgn0037758	CG9467	FBgn0027106	inx7	FBgn0024941	RSG7	FBgn0030960	CG7053	FBgn0259242	CG42340	FBgn0028670	Vha100-2	FBgn0028663	VhaM9.7-b	FBgn0001092	Gapdh2	FBgn0035515	CG14997	FBgn0030993	Mec2	FBgn0023172	RhoGEF2	FBgn0038686	CG5555	FBgn0052845	CG32845	FBgn0031971	CG7224	FBgn0038659	endoA	FBgn0039911	CG1909	FBgn0002921	Atpalpha	FBgn0053138	CG33138
FBgn0031459	CG2862	FBgn0034598	CG4266	FBgn0037478	CG2656	FBgn0004635	rho	FBgn0024733	RpL10	FBgn0002922	nau	FBgn0086675	fne	FBgn0002526	LanA	FBgn0031239	CG17075	FBgn0259927	CG42450	FBgn0027279	l(1)G0196	FBgn0260971	CG42594	FBgn0044030	mRpS14	FBgn0034940	CG16787	FBgn0051780	CG31780	FBgn0039543	CG12428	FBgn0032286	CG7300	FBgn0029134	Prosbeta5	FBgn0028693	Rpn12	FBgn0016126	CaMKI	FBgn0031866	neuroligin	FBgn0260432		FBgn0259214	PMCA	FBgn0022160	Gpo-1	FBgn0033955	CG12866
FBgn0000258		FBgn0001280	janA	FBgn0031361	CG17652	FBgn0030318	rho-4	FBgn0011674	insc	FBgn0037108	CG11306	FBgn0260400	elav	FBgn0261563	wb	FBgn0029834	CG5937	FBgn0086913	Rab26	FBgn0039081	Irk2	FBgn0039927	CG11155	FBgn0015393	hoip	FBgn0085220	CG34191	FBgn0031389	CG4259	FBgn0037440	CG1041	FBgn0033373	CG8080	FBgn0036509	CG7739	FBgn0043362	bchs	FBgn0039637	CG11880	FBgn0053531	Ddr	FBgn0033031	CG8245	FBgn0019985	mGluRA	FBgn0039830	CG1746	FBgn0019624	CoVa
FBgn0027791	O-fut2	FBgn0015949	hrg	FBgn0031479	Prx6005	FBgn0014868	Ost48	FBgn0022246	Rpp30	FBgn0058045	CG40045	FBgn0003256	rl	FBgn0042650	disco-r	FBgn0040395	Unc-76	FBgn0034943	Fmo-1	FBgn0000244	by	FBgn0004168	5-HT1A	FBgn0030676	CG12379	FBgn0026741	mRpL18	FBgn0032729	CG10639	FBgn0046322	p38c			FBgn0051715	CG31715	FBgn0052626	CG32626	FBgn0038412	Zip3	FBgn0037964	CG14731	FBgn0002306	sas	FBgn0031585	CG2955	FBgn0086348	se	FBgn0032650	CG7094
FBgn0037647	RagA	FBgn0030208	PPP4R2r	FBgn0011726	tsr	FBgn0000233	btd	FBgn0000212	brm	FBgn0030990	CG7556	FBgn0013469	klu	FBgn0001105	Gbeta13F	FBgn0039429	CG14238	FBgn0051191	CG31191	FBgn0027779	VhaSFD	FBgn0004573	5-HT7	FBgn0033661	CG13185	FBgn0030251	CG2145	FBgn0039094	CG10184	FBgn0037817	Cyp12e1			FBgn0036257	RhoGAP68F	FBgn0033962	CG10153	FBgn0259144	CG42259	FBgn0031465	CG3123	FBgn0004370	Ptp10D	FBgn0035603	CG10635	FBgn0033980	Cyp6a20	FBgn0027505	rab3-GAP
FBgn0030500	Ndc80	FBgn0032014	CG7840	FBgn0033810	CG4646	FBgn0031655	Marcal1	FBgn0039020	CG17141	FBgn0013325	RpL11	FBgn0039776	PH4alphaEFB	FBgn0260855	Sec22	FBgn0035331	DmsR-1	FBgn0038366	CG4576	FBgn0015714	Cyp6a17	FBgn0011582	DopR	FBgn0010078	RpL23	FBgn0004926	eIF-2beta	FBgn0019830	colt	FBgn0050489	Cyp12d1-p			FBgn0038809	CG16953	FBgn0010225	Gel	FBgn0001404	egh	FBgn0032967	CG1428	FBgn0031283	CG15880	FBgn0039908	Asator	FBgn0033982	Cyp317a1	FBgn0039373	CG5024
FBgn0026149	BCL7-like	FBgn0036104	CG6418	FBgn0031873	Gas41	FBgn0022787	Hel89B	FBgn0046706	Haspin	FBgn0030806	CG13001	FBgn0017397		FBgn0052105	CG32105	FBgn0030345	CG1847	FBgn0036934	sNPF-R	FBgn0033978	Cyp6a23	FBgn0004624		FBgn0015019	Cctgamma	FBgn0015298	Srp19	FBgn0039802	dj-1beta	FBgn0053503	Cyp12d1-d			FBgn0035528	CG15012	FBgn0028686	Rpt3	FBgn0261618	larp	FBgn0051933	CG31933	FBgn0061359	CG33671	FBgn0034156	CG5348	FBgn0015038	Cyp9b1	FBgn0027621	Pfrx
FBgn0005777	PpD3	FBgn0030631	CG6227	FBgn0050431	CG30431	FBgn0002924	ncd	FBgn0052590	CG32590	FBgn0032904	Mtp	FBgn0261260	mgl	FBgn0036274	CG4328	FBgn0039025	CG7023	FBgn0037408	NPFR1	FBgn0033982	Cyp317a1	FBgn0025709	CG8083	FBgn0037607	CG8036	FBgn0038893	CG6353	FBgn0034440	CG10073	FBgn0038680	Cyp12a5			FBgn0002787	Mov34	FBgn0030407	CG2543	FBgn0019650	toy	FBgn0032338	CG16854	FBgn0032943	Tsp39D	FBgn0085191	CG34162	FBgn0030369	Cyp318a1	FBgn0031575	Cep97
FBgn0030738	CG9915	FBgn0051495	CG31495	FBgn0038454	CG10324	FBgn0041087	wun2	FBgn0034795	MED23	FBgn0261592	RpS6	FBgn0260933	rempA	FBgn0029147	NtR	FBgn0016660	H15	FBgn0052506	CG32506	FBgn0031688	Cyp28d2	FBgn0041605	cpx	FBgn0031662	CG3792	FBgn0001248	Idh	FBgn0034441	CG10081	FBgn0038681	Cyp12a4			FBgn0028695	Rpn1	FBgn0035438	PHGPx	FBgn0019948	Phm	FBgn0052110	CG32110	FBgn0033629	Tsp47F	FBgn0052174	CG32174	FBgn0250814	CG4169	FBgn0038918	CG6690
FBgn0034491	CG11055	FBgn0003308	ry	FBgn0011289	TfIIA-L	FBgn0033507	CG12909	FBgn0032919	CG9253	FBgn0032236	mRpS7	FBgn0010741	l(3)01239	FBgn0034997	CG3376	FBgn0015609	CadN	FBgn0260966		FBgn0031689	Cyp28d1	FBgn0053517	D2R	FBgn0051229	CG31229	FBgn0035272	mRpL46	FBgn0033720	CG13160	FBgn0003388	shd			FBgn0032170	CG4658	FBgn0032216	CG5384	FBgn0031814	retm	FBgn0261395	Prosalpha3T	FBgn0039137	CG13604	FBgn0259241	CG42339	FBgn0040793	CG7630	FBgn0051413	CG31413
FBgn0029764		FBgn0037478	CG2656	FBgn0036184	PCID2	FBgn0032955	CG2201	FBgn0039487	gb	FBgn0033088	CG3271	FBgn0025740	plexB	FBgn0037374	jagn	FBgn0052702	CG32702	FBgn0034484	CG11044	FBgn0038007	Cyp313a3	FBgn0032187	CG4839	FBgn0034001	mRpL41	FBgn0024996	eIF2B-beta	FBgn0053012	CG33012	FBgn0039817	CG15553			FBgn0030693	CG8974	FBgn0040064	yip2	FBgn0038747	RhoGAP92B	FBgn0013948		FBgn0037613	Cks85A	FBgn0022160	Gpo-1	FBgn0010015	CanA1	FBgn0037962	CG6971
FBgn0052442	CG32442	FBgn0030894	CG7192	FBgn0051184	LSm3	FBgn0015402	ksr	FBgn0052281	CG32281	FBgn0021795	Tapdelta	FBgn0025741	plexA	FBgn0039851	mey	FBgn0259140	CG42255	FBgn0035265	CG18173	FBgn0022097	Vha36-1	FBgn0000273	Pka-C1	FBgn0023542	Nmd3	FBgn0028833	Dak1	FBgn0034436	CG11961	FBgn0051321	CG31321			FBgn0027565	CG5498	FBgn0003744	trc	FBgn0014380	RhoL	FBgn0030662	CG9220	FBgn0035321	CG1275	FBgn0086348	se	FBgn0015519	nAcRalpha-7E	FBgn0261955	kdn
FBgn0039650	Mesh1	FBgn0031361	CG17652	FBgn0000147	aur	FBgn0039113	CG10217	FBgn0039182	CG5728	FBgn0034350	CG5189	FBgn0030719	eIF5	FBgn0039852	nyo	FBgn0040281	Aplip1	FBgn0015558	tty	FBgn0024238	Fim	FBgn0260446	GABA-B-R1	FBgn0036319	Ent3	FBgn0037529	mRpS9	FBgn0051668	CG31668	FBgn0032704	Jwa			FBgn0034744	Vps20	FBgn0005626	ple	FBgn0041182	TepII	FBgn0031623	Taf12L	FBgn0261673	nemy	FBgn0038076	Cyp313a4	FBgn0003074	Pgi	FBgn0037988	CG14740
FBgn0032244	RfC3	FBgn0031479	Prx6005	FBgn0034722	Rtf1	FBgn0032690	CG10333	FBgn0031224	CG11454	FBgn0002022	Catsup	FBgn0001323	knrl	FBgn0039704	neo	FBgn0034070	SP2353	FBgn0004574	Rop	FBgn0259150	CG42265	FBgn0027575	GABA-B-R2	FBgn0031321	Tgt	FBgn0064117	CG33714	FBgn0051262	CG31262	FBgn0052249	CG32249			FBgn0086134	Pros25	FBgn0260744	Tango9	FBgn0041183	TepI	FBgn0038773	CG10887	FBgn0023023	CRMP	FBgn0030369	Cyp318a1	FBgn0039530	Tusp	FBgn0038539	Atg8b
FBgn0011708	Syx5	FBgn0011726	tsr	FBgn0037841	CG4565	FBgn0039407	CG14544	FBgn0031287	CG4291	FBgn0030433	mRpL49	FBgn0040324	Ephrin	FBgn0029128	tyn	FBgn0031955	CG14535	FBgn0029105	alpha-catenin-related	FBgn0031514	CG3332	FBgn0016650	Lgr1	FBgn0023179	amon	FBgn0037602	CG8021	FBgn0039872	salt	FBgn0051496	CG31496			FBgn0261394	Pros29	FBgn0024814	Clc	FBgn0031939	CG13796	FBgn0051907	CG31907	FBgn0027589	CG1688	FBgn0030367	Cyp311a1	FBgn0051116	ClC-a	FBgn0037939	CG14718
FBgn0051158	Efa6	FBgn0031873	Gas41	FBgn0086908	egg	FBgn0001994	crp	FBgn0039743	CG7946	FBgn0030749	Anxb11	FBgn0033529	CG17765	FBgn0016047	nompA	FBgn0053094	Synd	FBgn0004397	Vinc	FBgn0010015	CanA1	FBgn0028743	CG5036	FBgn0038597	CG8064	FBgn0036774	mRpS26	FBgn0017448	CG2187	FBgn0039156	CG6178			FBgn0001145	Gs2	FBgn0262603	sec8	FBgn0260964	Vmat	FBgn0030377	CG1924	FBgn0039916	CG9935	FBgn0040377	Vha36-3	FBgn0034089	CG8446	FBgn0034472	CG8517
FBgn0030858	IntS2	FBgn0038454	CG10324	FBgn0030063	CG1789	FBgn0044323	Cka	FBgn0011571	caz	FBgn0261697	tectonic	FBgn0086378	Alg-2	FBgn0033739	Dyb	FBgn0261341	verm	FBgn0032264	Lip4	FBgn0036274	CG4328	FBgn0259927	CG42450	FBgn0028961	AlstR	FBgn0037057	CG10512	FBgn0023477	Tal	FBgn0034553	CG9993			FBgn0001142	Gs1	FBgn0053265	Muc68E	FBgn0013955		FBgn0030755		FBgn0031634	Ir25a	FBgn0014023	Rlc1	FBgn0032381	Mal-B1	FBgn0024986	CG3719
FBgn0259734	CG42388	FBgn0011289	TfIIA-L	FBgn0027101	Dyrk3	FBgn0063667	CG32335	FBgn0028926	NC2beta	FBgn0026372	RpL23A	FBgn0023170	RpL39	FBgn0039738	Mgat2	FBgn0260653	serp	FBgn0051871	CG31871	FBgn0030641	CG6299	FBgn0032845	CG10747	FBgn0039595	AR-2	FBgn0031357	mRpL48	FBgn0010053	Jheh1	FBgn0085453	CG34424			FBgn0000535	eag	FBgn0031298	Atg4	FBgn0037721	CG9427	FBgn0033326	CG14743	FBgn0011582	DopR	FBgn0259994	CG42492	FBgn0085410	TrissinR	FBgn0039855	CG1638
FBgn0034270	CG6401	FBgn0036184	PCID2	FBgn0031266	CG2807	FBgn0030000	CG2260	FBgn0032149	CG4036	FBgn0022740	HLH54F	FBgn0033791	Drl-2	FBgn0040348	CG3703	FBgn0032598	ChLD3	FBgn0035879	CG7112	FBgn0015519	nAcRalpha-7E	FBgn0086913	Rab26	FBgn0032287	CG6415	FBgn0039840	CG11340	FBgn0031860	CG11236	FBgn0032881	CG9319			FBgn0033999	CG8093	FBgn0031412	CG16995	FBgn0085638	CG41378	FBgn0034156	CG5348	FBgn0035989	CG3967	FBgn0030758	CanA-14F	FBgn0036680	Cpr73D	FBgn0010263	Rbp9
FBgn0031492	CG3542	FBgn0051184	LSm3	FBgn0002736	mago	FBgn0028744	CG5033	FBgn0035162	CG13900	FBgn0025469	slv	FBgn0003008	or	FBgn0259144	CG42259	FBgn0052499	Cda4	FBgn0037436	Hr83	FBgn0000036	nAcRalpha-96Aa	FBgn0036816	Indy	FBgn0036997	CG5955	FBgn0033079	Fmo-2	FBgn0051052		FBgn0030443	CG12715			FBgn0031143	CG1532	FBgn0031381	Npc2a	FBgn0001224	Hsp23	FBgn0033599	CG13223	FBgn0036327	CG10748	FBgn0039518	CG13978	FBgn0033054	CG14591	FBgn0052703	Erk7
FBgn0036462	mRpL39	FBgn0034722	Rtf1	FBgn0038585	CG7993	FBgn0051989	Cap-D3	FBgn0260400	elav	FBgn0036501	CG7272	FBgn0035909	ergic53	FBgn0034391	CG15080	FBgn0030964	Pvf1	FBgn0028400	Syt4	FBgn0036043	CG8177	FBgn0040505	Alk	FBgn0020506	Amyrel	FBgn0035947	Srp68	FBgn0086450	su(r)	FBgn0029118	Sucb			FBgn0086656	shrb	FBgn0027865	Tsp96F	FBgn0001225	Hsp26	FBgn0085191	CG34162	FBgn0033763	CG8646	FBgn0038961	CG13850	FBgn0038201	Pk1r	FBgn0023516	Pex5
FBgn0023458	Rbcn-3A	FBgn0033995	CG8090	FBgn0032169	CG4709	FBgn0037108	CG11306	FBgn0052318	CG32318	FBgn0262601	SmB	FBgn0020309	crol	FBgn0002528	LanB2	FBgn0020307	dve	FBgn0261090	Sytbeta	FBgn0085395	Shawl	FBgn0051191	CG31191	FBgn0027580	CG1516	FBgn0037608	mRpL19	FBgn0037697	CG9363	FBgn0035679	CG10467			FBgn0036756	cln3	FBgn0039241	CG11089	FBgn0001226	Hsp27	FBgn0037612	CG8112	FBgn0036848	CG10424	FBgn0004118	nAcRbeta-96A	FBgn0011361	mtacp1	FBgn0051017	PH4alphaNE3
FBgn0037364	Rab23	FBgn0037841	CG4565	FBgn0262519	Mi-2	FBgn0024371	E2f2	FBgn0011817	nmo	FBgn0032480	Edem2	FBgn0051782		FBgn0039858	CycG	FBgn0028879	CG15270	FBgn0038814	CG15923	FBgn0003386	Shaw	FBgn0036934	sNPF-R	FBgn0053513	Nmdar2	FBgn0031544	CG17593	FBgn0020385	pug	FBgn0032235	CG5096			FBgn0003209	raw	FBgn0025693	CG11163	FBgn0001229	Hsp67Bc	FBgn0027572	CG5009	FBgn0036882	CG9279	FBgn0000024	Ace	FBgn0038271	CG3731	FBgn0051016	CG31016
FBgn0033901	O-fut1	FBgn0086908	egg	FBgn0023395	Chd3	FBgn0030990	CG7556	FBgn0015834	Trip1	FBgn0034360	CG10927	FBgn0025802	Sbf	FBgn0034345	CG5174	FBgn0039068	CG13827	FBgn0041105	nerfin-2	FBgn0033107	koi	FBgn0037408	NPFR1	FBgn0010399	Nmdar1	FBgn0033906	CG8331	FBgn0011768	Fdh	FBgn0010424	TpnC73F			FBgn0035879	CG7112	FBgn0037623	CG9801	FBgn0001227	Hsp67Ba	FBgn0039006	Cyp6d4	FBgn0031530	pgant2	FBgn0038519	Prx3	FBgn0260479	CG31904	FBgn0028433	Ggamma30A
FBgn0086689		FBgn0030063	CG1789	FBgn0025637	skpA	FBgn0035099	CG6845	FBgn0013469	klu	FBgn0058191	CG40191	FBgn0038603	PKD	FBgn0041723	rho-5	FBgn0036698	CG7724	FBgn0027596	CG10249	FBgn0002571	Mal-A3	FBgn0031116	CG1695	FBgn0259109		FBgn0001218	Hsc70-3	FBgn0039877	CG2118	FBgn0037913	fabp			FBgn0033708	CG8850	FBgn0032017	CG7810	FBgn0030503	Tango2	FBgn0033775	Cyp9h1	FBgn0027575	GABA-B-R2	FBgn0034089	CG8446	FBgn0038400	CG5903	FBgn0028325	l(1)G0334
FBgn0032030	Wdr82	FBgn0010380	Bap	FBgn0026175	skpC	FBgn0002543	lea	FBgn0035761	RhoGEF4	FBgn0052407	CG32407	FBgn0260963		FBgn0031239	CG17075	FBgn0033214	CG1941	FBgn0000244	by	FBgn0031770	CG13995	FBgn0052506	CG32506	FBgn0034885	CG4019	FBgn0031639	mRpS2	FBgn0028699	Rh50	FBgn0042102	CG18745			FBgn0028886	CG15279	FBgn0000052	ade2	FBgn0034184	CG9646	FBgn0015040	Cyp9c1	FBgn0051742	CG31742	FBgn0034391	CG15080	FBgn0037873	SdhC	FBgn0029722	CG7024
FBgn0027903	CG12018	FBgn0040078	pont	FBgn0038427	ema	FBgn0005631	robo	FBgn0038307	mRpS10	FBgn0038811	CG4159	FBgn0086683	Spf45	FBgn0029834	CG5937	FBgn0035756	unc-13-4A	FBgn0002921	Atpalpha	FBgn0027106	inx7	FBgn0038832	CG15695	FBgn0034884	CG17662	FBgn0036300	CG10688	FBgn0039849	CG11334	FBgn0042105	CG18748			FBgn0036107	CG7949	FBgn0033756	CG17760	FBgn0052499	Cda4	FBgn0041337	Cyp309a2	FBgn0038090	CG10909	FBgn0036680	Cpr73D	FBgn0036821	CG3961	FBgn0029880	CG14443
FBgn0004832	Xpac	FBgn0051961	CG31961	FBgn0030318	rho-4	FBgn0031590	CG3702	FBgn0029629	CG8636	FBgn0053977	CG33977	FBgn0010812	unc-45	FBgn0039641	CG14511	FBgn0002522	lab	FBgn0259241	CG42339	FBgn0038140	CG8784	FBgn0035265	CG18173	FBgn0261283	HLH106	FBgn0039726	eIF2B-alpha	FBgn0030612	CG5599	FBgn0042101	CG18744			FBgn0028691	Rpn9	FBgn0034674	CG9304	FBgn0036684	CG3764	FBgn0032294	Vha16-5	FBgn0260466	Indy-2	FBgn0261276	opa1-like	FBgn0030605	CG5548	FBgn0033692	wash
FBgn0015737	Hmu	FBgn0033199	CG17985	FBgn0014868	Ost48	FBgn0030806	CG13001	FBgn0003261	Rm62	FBgn0003460	so	FBgn0259712	CG42366	FBgn0035676	CG6619	FBgn0261642	mbl	FBgn0033978	Cyp6a23	FBgn0052495	CG32495	FBgn0029105	alpha-catenin-related	FBgn0015756	RpL9	FBgn0032790	CG10194	FBgn0031821	CG9542	FBgn0037465	CG1105			FBgn0032787	CG10195	FBgn0036573		FBgn0011745	Arp87C	FBgn0014427	CG11899	FBgn0050147	Hil	FBgn0038874	ETHR	FBgn0024251	bbx	FBgn0261996	CG42814
FBgn0034008	CG8152	FBgn0031266	CG2807	FBgn0000233	btd	FBgn0033846	mip120	FBgn0036754	CG5589	FBgn0003896	tup	FBgn0036819	dysb	FBgn0040513	kappaB-Ras	FBgn0030340	CG15740	FBgn0033982	Cyp317a1	FBgn0030882	GS	FBgn0004397	Vinc	FBgn0032222	CG5037	FBgn0036853	mRpL21	FBgn0039349	Ssadh	FBgn0037518	CG2641			FBgn0010288	Uch	FBgn0052280	CG32280	FBgn0032731	CG10641	FBgn0029679	CG2901	FBgn0037838	CG4089	FBgn0039909	CG1970	FBgn0028342	l(1)G0230	FBgn0032156	CG13124
FBgn0035111	CG16940	FBgn0034803	CG9849	FBgn0031655	Marcal1	FBgn0033491	CG18011	FBgn0003559	su(f)	FBgn0026411	Lim1	FBgn0032799	CG10166	FBgn0035308	CG15822	FBgn0035719	tow	FBgn0001078	ftz-f1	FBgn0013343	Syx1A	FBgn0039915	CG1732	FBgn0039882	CG11576	FBgn0030572	mRpS25	FBgn0024957	Irp-1B	FBgn0036575	CG5157			FBgn0028399	TMS1	FBgn0261396	Rpn3	FBgn0086901	cv-c	FBgn0037916	CG5342	FBgn0000557	Ef1alpha100E	FBgn0036210	CG14130	FBgn0035113	pyx	FBgn0035240	CG33791
FBgn0035831	CG8038	FBgn0002736	mago	FBgn0022787	Hel89B	FBgn0259212	cno	FBgn0031194	CG17598	FBgn0025725	alphaCop	FBgn0046685	Wsck	FBgn0025286	RpL31	FBgn0036147	Plod	FBgn0259150	CG42265	FBgn0043005	prt	FBgn0027538	beta4GalNAcTA	FBgn0031660	mRpL28	FBgn0030678	CG11679	FBgn0021765	scu	FBgn0032436	CG5418			FBgn0026380	Prosbeta3	FBgn0031535	CG12795	FBgn0259227	CG42327	FBgn0052845	CG32845	FBgn0037313	CG1161	FBgn0039379	CG5886	FBgn0259481	Mob2	FBgn0010352	Nc73EF
FBgn0037312	CG11999	FBgn0035713	CG10107	FBgn0034614	CG9752	FBgn0000477	DNaseII	FBgn0250911	CG42245	FBgn0032816	Nf-YB	FBgn0039052	CG6733	FBgn0040395	Unc-76	FBgn0051915	CG31915	FBgn0010015	CanA1	FBgn0033579	CG13229	FBgn0259225	Pde1c	FBgn0038852	CG7056	FBgn0010213	Sod2	FBgn0032205	CG4957	FBgn0030993	Mec2			FBgn0015283	Pros54	FBgn0005677	dac	FBgn0033215	CG1942	FBgn0001324	kto	FBgn0259735	CG42389	FBgn0036821	CG3961	FBgn0001223	Hsp22	FBgn0033880	CG6553
FBgn0260990	yata	FBgn0036428	CG9238	FBgn0022069	Nnp-1	FBgn0034264	CG10933	FBgn0031993	Piezo	FBgn0024733	RpL10	FBgn0031049	Sec61gamma	FBgn0020386	Pdk1	FBgn0035936	Tsp66E	FBgn0035649	CG10483	FBgn0052264	CG32264	FBgn0261090	Sytbeta	FBgn0040234	c12.2	FBgn0027610	Dic1	FBgn0050022	CG30022	FBgn0032286	CG7300			FBgn0011230	poe	FBgn0040396	CG3939	FBgn0027546	CG4766	FBgn0033865	CG6220	FBgn0011569	can	FBgn0037721	CG9427	FBgn0035817	CG7409	FBgn0052413	CG32413
FBgn0025549	unc-119	FBgn0038585	CG7993	FBgn0261554	CG42672	FBgn0019949	Cdk9	FBgn0037469	Dpck	FBgn0010470	Fkbp13	FBgn0033691	CG8860	FBgn0039025	CG7023	FBgn0036196	CG11658	FBgn0036274	CG4328	FBgn0015324	Vha26	FBgn0039911	CG1909	FBgn0033911	VGAT	FBgn0039674	CG1907	FBgn0033608	CG13220	FBgn0034488	CG11208			FBgn0029736	CG4041	FBgn0038428	CG14894	FBgn0033240	CG2906	FBgn0052461	CG32461	FBgn0051211	CG31211	FBgn0035113	pyx	FBgn0035982	CG4461	FBgn0040628	CG18672
FBgn0040230	dbo	FBgn0039489	CG5880	FBgn0002924	ncd	FBgn0050122	CG30122	FBgn0025740	plexB	FBgn0011674	insc	FBgn0025806	Rap2l	FBgn0020389	Papss	FBgn0052311	zormin	FBgn0030641	CG6299	FBgn0032181	CG13133	FBgn0030960	CG7053	FBgn0021874	Nle	FBgn0037714	CG9396	FBgn0052196	CG32196					FBgn0037612	CG8112	FBgn0000099	ap	FBgn0032036	CG13384	FBgn0032368	spag4	FBgn0035892	exo70	FBgn0001247	Ide	FBgn0032181	CG13133	FBgn0032857	CG10947
FBgn0021818	cnk	FBgn0032169	CG4709	FBgn0041087	wun2	FBgn0022740	HLH54F	FBgn0001320	kni	FBgn0022246	Rpp30	FBgn0034967	eIF-5A	FBgn0086676	spin	FBgn0036612	CG4998	FBgn0015519	nAcRalpha-7E	FBgn0262018	CadN2	FBgn0259214	PMCA	FBgn0025687	LKR	FBgn0260407	mRpS23	FBgn0036824	CG3902					FBgn0034756	Cyp6d2	FBgn0261983	l(2)gd1	FBgn0003748	Treh	FBgn0261618	larp	FBgn0031971	CG7224	FBgn0034135	Syn2	FBgn0020907	Scp2	FBgn0028669	Vha100-3
FBgn0035848	CG7979	FBgn0262519	Mi-2	FBgn0031598	CG3338	FBgn0082598	akirin	FBgn0039306	CG11859	FBgn0032470	CG5142	FBgn0032671	CG7200	FBgn0039099	CG10157	FBgn0036834	CG6836	FBgn0004118	nAcRbeta-96A	FBgn0032940	Mio	FBgn0019985	mGluRA	FBgn0038871	CG3337	FBgn0039537	CG5590	FBgn0000566	Eip55E					FBgn0033697	Cyp6t3	FBgn0261445	sgl	FBgn0013770	Cp1	FBgn0015774	NetB	FBgn0031866	neuroligin	FBgn0036688	Fit2	FBgn0039112	CG10219	FBgn0052319	CG32319
FBgn0039450	CG5484	FBgn0050497	CG30497	FBgn0033507	CG12909	FBgn0032821	CdGAPr	FBgn0038369	Arpc3A	FBgn0039020	CG17141	FBgn0050502	fa2h	FBgn0019925	Surf4	FBgn0039620	CG1443	FBgn0000036	nAcRalpha-96Aa	FBgn0260945	Atg1	FBgn0027279	l(1)G0196	FBgn0002031	l(2)37Cc	FBgn0026761	Trap1	FBgn0036820	CG6852					FBgn0038037	Cyp9f2	FBgn0020647	KrT95D	FBgn0034117	CG7997	FBgn0261797	Dhc64C	FBgn0053531	Ddr	FBgn0004117	Tm2	FBgn0032147	IP3K1	FBgn0027582	CG6230
FBgn0024308		FBgn0040020	MED21	FBgn0032955	CG2201	FBgn0261792	snRNP-U1-C	FBgn0026417	Hus1-like	FBgn0052590	CG32590	FBgn0261387	CG17528	FBgn0000179	bi	FBgn0033464	CG1441	FBgn0016047	nompA	FBgn0036359	CG14105	FBgn0039081	Irk2	FBgn0035083	Tina-1	FBgn0027779	VhaSFD	FBgn0035515	CG14997					FBgn0003996	w	FBgn0030791	CG9132	FBgn0037279	CG1129	FBgn0037659	Kdm2	FBgn0037964	CG14731	FBgn0004363	porin	FBgn0023129	aay	FBgn0035957	CG5144
FBgn0037526	CG10092	FBgn0034933	CG3735	FBgn0003079	phl	FBgn0262601	SmB	FBgn0014029	2013-09-02	FBgn0034968	RpL12	FBgn0043362	bchs	FBgn0016660	H15	FBgn0043792	CG30427	FBgn0033739	Dyb	FBgn0035498	Fit1	FBgn0000244	by	FBgn0029885	CG3224	FBgn0031813	CG9527	FBgn0037440	CG1041					FBgn0014427	CG11899	FBgn0023172	RhoGEF2	FBgn0033476	oys	FBgn0034345	CG5174	FBgn0031465	CG3123	FBgn0040056	CG17698	FBgn0032673	CG7180	FBgn0050156	CG30156
FBgn0027539	CG5807	FBgn0025637	skpA	FBgn0039113	CG10217	FBgn0030674	CG8184	FBgn0003008	or	FBgn0036974	eRF1	FBgn0038947	sar1	FBgn0015609	CadN	FBgn0034143	CG8303	FBgn0003386	Shaw	FBgn0085261	CG34232	FBgn0259241	CG42339	FBgn0037543	CG10903	FBgn0034629	Acox57D-d	FBgn0050489	Cyp12d1-p					FBgn0034997	CG3376	FBgn0029134	Prosbeta5	FBgn0026084	cib	FBgn0019650	toy	FBgn0032338	CG16854	FBgn0032707	CG10348	FBgn0014028	SdhB	FBgn0261624	I-3
FBgn0023506	Es2	FBgn0026175	skpC	FBgn0262517	l(3)76BDr	FBgn0023511	Edem1	FBgn0003513	ss	FBgn0028527	CG18507	FBgn0038852	CG7056	FBgn0039294	Cad96Cb	FBgn0034436	CG11961	FBgn0034985	CG3328	FBgn0053474	CG33474	FBgn0027779	VhaSFD	FBgn0033907	mRpS16	FBgn0033981	Cyp6a21	FBgn0053503	Cyp12d1-d					FBgn0036448	mop	FBgn0036509	CG7739	FBgn0031760	Tsp26A	FBgn0038747	RhoGAP92B	FBgn0011206	bol	FBgn0038280	CG14861	FBgn0004117	Tm2	FBgn0033377	Pmm45A
FBgn0038816	Lrrk	FBgn0038427	ema	FBgn0039874	CG2135	FBgn0038811	CG4159	FBgn0025790	TBPH	FBgn0004867	RpS2	FBgn0011016	SsRbeta	FBgn0052702	CG32702	FBgn0030887	CG6867	FBgn0038312	CG4334	FBgn0016013	Faa	FBgn0015714	Cyp6a17	FBgn0033485	RpLP0-like	FBgn0000473	Cyp6a2	FBgn0036806	Cyp12c1					FBgn0016126	CaMKI	FBgn0051715	CG31715	FBgn0051780	CG31780	FBgn0041182	TepII	FBgn0031208	CG11023	FBgn0027360	Tim10	FBgn0032707	CG10348	FBgn0033969	CG10202
FBgn0031677	CG14036	FBgn0030318	rho-4	FBgn0030035	CG11190	FBgn0033095	CG3409	FBgn0001215	Hrb98DE	FBgn0050392	CG30392	FBgn0026401	Nipped-B	FBgn0259140	CG42255	FBgn0030052	CG12065	FBgn0039530	Tusp	FBgn0033760	CG8785	FBgn0033978	Cyp6a23	FBgn0031980	RpL36A	FBgn0013772	Cyp6a8	FBgn0038680	Cyp12a5					FBgn0034400	CG15099	FBgn0036816	Indy	FBgn0032638	CG6639	FBgn0031939	CG13796	FBgn0052110	CG32110	FBgn0034081	CG10731	FBgn0259678	sqa	FBgn0036784	CG5103
FBgn0039004	Nup133	FBgn0014868	Ost48	FBgn0032690	CG10333	FBgn0053116	CG33116	FBgn0032793	CG10189	FBgn0031224	CG11454	FBgn0025682	scf	FBgn0028327	l(1)G0320	FBgn0029950	CG9657	FBgn0051729	CG31729	FBgn0030816	CG16700	FBgn0033980	Cyp6a20	FBgn0031877	CG10399	FBgn0038194	Cyp6d5	FBgn0038681	Cyp12a4					FBgn0050359	Mal-A5	FBgn0036257	RhoGAP68F	FBgn0031470	CG18557	FBgn0029676	HIP-R	FBgn0038070	CG6753	FBgn0036146	CG14141	FBgn0034497	CG9090	FBgn0030449	Fer3HCH
FBgn0015565	yin	FBgn0000233	btd	FBgn0039407	CG14544	FBgn0016792	dmt	FBgn0030701	CG16952	FBgn0031287	CG4291	FBgn0003187	qua	FBgn0040281	Aplip1	FBgn0034286	dpr13	FBgn0040348	CG3703	FBgn0035756	unc-13-4A	FBgn0013772	Cyp6a8	FBgn0033876	synaptogyrin	FBgn0031688	Cyp28d2	FBgn0051321	CG31321					FBgn0000308	chic	FBgn0038809	CG16953	FBgn0033321	CG8738	FBgn0004897	fd96Ca	FBgn0031934	Ntl	FBgn0036145	CG7607	FBgn0031066	CoVIb	FBgn0053061	CG33061
FBgn0028685	Rpt4	FBgn0027052	CHIP	FBgn0001994	crp	FBgn0032296	CG6729	FBgn0031454	CG9960	FBgn0035722	CG10075	FBgn0010194	Wnt5	FBgn0261341	verm	FBgn0052057	dpr10	FBgn0033107	koi	FBgn0031322	CG5001	FBgn0033982	Cyp317a1	FBgn0029969	CG10932	FBgn0047135	CG32276	FBgn0051626	CG31626					FBgn0038139	CG8795	FBgn0038504	Sur-8	FBgn0032213	CG5390	FBgn0041630	Hexo1	FBgn0014859	Hr38	FBgn0002772	Mlc1	FBgn0036145	CG7607	FBgn0026147	CG16833
FBgn0035760	CG8607	FBgn0022069	Nnp-1	FBgn0044323	Cka	FBgn0015721	king-tubby	FBgn0026402	NiPp1	FBgn0024986	CG3719	FBgn0032256	RluA-2	FBgn0260653	serp	FBgn0032435	Oatp33Eb	FBgn0002571	Mal-A3	FBgn0002522	lab	FBgn0038194	Cyp6d5	FBgn0039713	RpS8	FBgn0022097	Vha36-1	FBgn0052248	CG32248					FBgn0035146	CG13893	FBgn0035528	CG15012	FBgn0034897	Sesn	FBgn0052568	CG32568	FBgn0259743		FBgn0040666	CG12848	FBgn0067783	att-ORFA	FBgn0031574	CG3964
FBgn0032014	CG7840	FBgn0002924	ncd	FBgn0030365	Tango4	FBgn0033169	CG11123	FBgn0037899	RpL24-like	FBgn0039179		FBgn0039977	CG17454	FBgn0032598	ChLD3	FBgn0036485	FucTA	FBgn0003965	v	FBgn0032456	MRP	FBgn0031688	Cyp28d2	FBgn0000037	mAcR-60C	FBgn0014023	Rlc1	FBgn0030966	CG7280					FBgn0014020	Rho1	FBgn0002787	Mov34	FBgn0031735	CG11029	FBgn0038795	CG4335	FBgn0032664	CG5755	FBgn0038281	RpL10Aa	FBgn0052103	CG32103	FBgn0030718	CG9172
FBgn0052438	Smc5	FBgn0027495	CG8378	FBgn0260985	RfC4	FBgn0031437	p16-ARC	FBgn0026585		FBgn0037092	M6	FBgn0033474	CG1407	FBgn0030870	CG6398	FBgn0085384	CG34355	FBgn0031770	CG13995	FBgn0035719	tow	FBgn0031689	Cyp28d1	FBgn0037546	CG7918	FBgn0035534	mRpS6	FBgn0031703	CG12512					FBgn0014380	RhoL	FBgn0037835	CG14687	FBgn0038221	CG3259	FBgn0011740	alpha-Man-II	FBgn0031623	Taf12L	FBgn0030707	CG8916	FBgn0002772	Mlc1	FBgn0031999	CG8419
FBgn0030631	CG6227	FBgn0003079	phl	FBgn0028744	CG5033	FBgn0000996	dup	FBgn0022224	ubl	FBgn0028926	NC2beta	FBgn0023081	gek	FBgn0028879	CG15270	FBgn0034797	nahoda	FBgn0039858	CycG	FBgn0030752	CG9947	FBgn0038007	Cyp313a3	FBgn0015521	RpS21	FBgn0038234	mRpL11	FBgn0038731	CG11659					FBgn0041183	TepI	FBgn0028695	Rpn1	FBgn0035425	CG17746	FBgn0038149	CG9796	FBgn0038773	CG10887	FBgn0086690	cp309	FBgn0032833	CoIV	FBgn0037544	CG11035
FBgn0033685	CG13178	FBgn0015402	ksr	FBgn0051989	Cap-D3	FBgn0003896	tup	FBgn0086683	Spf45	FBgn0037550	CG9667	FBgn0040780	CG12821	FBgn0039068	CG13827	FBgn0085426	Rgk3	FBgn0041723	rho-5	FBgn0030218	CG1628	FBgn0022097	Vha36-1	FBgn0023537	CG17896	FBgn0260855	Sec22	FBgn0038730	CG6300					FBgn0031939	CG13796	FBgn0034744	Vps20	FBgn0038053	CG18549	FBgn0085638	CG41378	FBgn0019985	mGluRA	FBgn0039835	mRpL32	FBgn0036116	CG7888	FBgn0036497	ran-like
FBgn0026873	MED18	FBgn0027083	Aats-met	FBgn0024371	E2f2	FBgn0086451	l(2)k09022	FBgn0029133	REG	FBgn0032149	CG4036	FBgn0260934	par-1	FBgn0261593	RpS10b	FBgn0039282	Bili	FBgn0085387	shakB	FBgn0051547	CG31547	FBgn0031514	CG3332	FBgn0035187	Trh	FBgn0038961	CG13850	FBgn0023535	arg					FBgn0261671	tweek	FBgn0086134	Pros25	FBgn0039131	CG12268	FBgn0000179	bi	FBgn0027596	CG10249	FBgn0050491	CG30491	FBgn0036115		FBgn0037818	CG6465
FBgn0038827	Fancd2	FBgn0031456	Trn-SR	FBgn0037236	Skp2	FBgn0033754	Ak6	FBgn0038597	CG8064	FBgn0086675	fne	FBgn0259823	CG42404	FBgn0028419	Kr-h2	FBgn0054056	CG34056	FBgn0027106	inx7	FBgn0050047	CG30047	FBgn0010015	CanA1	FBgn0035588	CG10672	FBgn0039704	neo	FBgn0011770	Gip					FBgn0004897	fd96Ca	FBgn0032249	CG5337	FBgn0023550	CG18031	FBgn0016660	H15	FBgn0031585	CG2955	FBgn0052112	CG32112	FBgn0086690	cp309	FBgn0028868	CG4701
FBgn0039751	CG1983	FBgn0261532	cdm	FBgn0035838	ldbr	FBgn0032816	Nf-YB	FBgn0033400	CG2063	FBgn0260400	elav	FBgn0260432		FBgn0039111	Plip	FBgn0031468	CG2975	FBgn0038140	CG8784	FBgn0033720	CG13160	FBgn0035649	CG10483	FBgn0030968	CG7322	FBgn0036211	CG5946	FBgn0026721	fat-spondin					FBgn0041630	Hexo1	FBgn0261394	Pros29	FBgn0019886	Letm1	FBgn0001226	Hsp27	FBgn0051907	CG31907	FBgn0032192	CG5731	FBgn0021906	RFeSP	FBgn0003068	per
FBgn0034231	Apc10	FBgn0030035	CG11190	FBgn0037552	CG7800	FBgn0011674	insc	FBgn0046685	Wsck	FBgn0037087	CG7519	FBgn0020912	Ptx1	FBgn0034500	CG11200	FBgn0031466	CG3119	FBgn0039152	Rootletin	FBgn0034437	CG10051	FBgn0036274	CG4328	FBgn0037354	CG12171	FBgn0010340	140up	FBgn0029118	Sucb					FBgn0040285	Scamp	FBgn0001218	Hsc70-3	FBgn0037094	CG7611	FBgn0001227	Hsp67Ba	FBgn0030191	CG15306	FBgn0039217	CG13627	FBgn0031322	CG5001	FBgn0031228	CG11455
FBgn0039588	CG12413	FBgn0034215	CG4802	FBgn0002543	lea	FBgn0022246	Rpp30	FBgn0032408	CG6712	FBgn0039776	PH4alphaEFB	FBgn0000061	al	FBgn0002522	lab	FBgn0035398	Cht7	FBgn0029834	CG5937	FBgn0038466	CG8907	FBgn0019932	SamDC	FBgn0051548	CG31548	FBgn0033096	ZIP1	FBgn0037239	CG11739					FBgn0028992	sds22	FBgn0001142	Gs1	FBgn0082582	tmod	FBgn0030503	Tango2	FBgn0030377	CG1924	FBgn0010350	CdsA	FBgn0034117	CG7997	FBgn0036762	CG7430
FBgn0031600	CG3652	FBgn0032690	CG10333	FBgn0031590	CG3702	FBgn0000212	brm	FBgn0033691	CG8860	FBgn0038307	mRpS10	FBgn0027865	Tsp96F	FBgn0041342	Cct1	FBgn0004449	Ten-m	FBgn0029849	Efr	FBgn0035610	Lkr	FBgn0030641	CG6299	FBgn0040349	CG3699	FBgn0038519	Prx3	FBgn0030737	CG9914					FBgn0085638	CG41378	FBgn0000535	eag	FBgn0031765	CG9109	FBgn0035799	CG14838	FBgn0051501	nxf4	FBgn0001216	Hsc70-1	FBgn0032497	CG6043	FBgn0016120	ATPsyn-d
FBgn0051495	CG31495	FBgn0032934	CG8679	FBgn0030806	CG13001	FBgn0032919	CG9253	FBgn0261619	pAbp	FBgn0038951	CG5380	FBgn0043550	Tsp68C	FBgn0261642	mbl	FBgn0026403	Ndg	FBgn0041181	TepIII	FBgn0030052	CG12065	FBgn0037212	nAcRalpha-80B	FBgn0016687	Nurf-38	FBgn0040309	Jafrac1	FBgn0033949	CG10131					FBgn0060296	pain	FBgn0034990	CG11406	FBgn0029091	CS-2	FBgn0261872	scaf6	FBgn0039908	Asator	FBgn0035538	DopEcR	FBgn0001091	Gapdh1	FBgn0034133	CG7813
FBgn0028436	ECSIT	FBgn0001994	crp	FBgn0022936	CycH	FBgn0039487	gb	FBgn0038473	ns1	FBgn0031194	CG17598	FBgn0013749	Arf102F	FBgn0039555	mRpS22	FBgn0016075	vkg	FBgn0040395	Unc-76	FBgn0038641	CG7708	FBgn0004118	nAcRbeta-96A	FBgn0002593	RpLP1	FBgn0050360	Mal-A6	FBgn0030518	CG11134					FBgn0001224	Hsp23	FBgn0031143	CG1532	FBgn0001311	kkv	FBgn0259741	CG42395	FBgn0033326	CG14743	FBgn0038451	CG14893	FBgn0052311	zormin	FBgn0037391	CG2017
FBgn0087040	alphaTub67C	FBgn0031759	lid	FBgn0033846	mip120	FBgn0032600	CG17912	FBgn0025806	Rap2l	FBgn0260933	rempA	FBgn0010348	Arf79F	FBgn0250788	beta-Spec	FBgn0000299	Cg25C	FBgn0039429	CG14238	FBgn0053124	CG33124	FBgn0036043	CG8177	FBgn0036772	CG5290	FBgn0033297	Mal-A8	FBgn0027945	ppl					FBgn0001226	Hsp27	FBgn0086656	shrb	FBgn0037443	CG1021	FBgn0015239	Hr78	FBgn0034156	CG5348	FBgn0039620	CG1443	FBgn0033321	CG8738	FBgn0050325	CG30325
FBgn0030753	rngo	FBgn0036004	Jarid2	FBgn0033491	CG18011	FBgn0031782	WDR79	FBgn0023509	mip130	FBgn0010741	l(3)01239	FBgn0032217	CG4972	FBgn0039217	CG13627	FBgn0085425	CG34396	FBgn0260964	Vmat	FBgn0051668	CG31668	FBgn0085395	Shawl	FBgn0033562		FBgn0003965	v	FBgn0050410	Rpi					FBgn0011296	l(2)efl	FBgn0030838	CG5445	FBgn0001321	knk	FBgn0000108	Appl	FBgn0085191	CG34162	FBgn0043792	CG30427	FBgn0028336	l(1)G0255	FBgn0003071	Pfk
FBgn0037478	CG2656	FBgn0030365	Tango4	FBgn0036558		FBgn0052281	CG32281	FBgn0034967	eIF-5A	FBgn0037469	Dpck	FBgn0027491	Cdk5alpha	FBgn0035719	tow	FBgn0034622	CG15666	FBgn0035331	DmsR-1	FBgn0037895	CG6723	FBgn0003386	Shaw	FBgn0031604	Elp3	FBgn0037100	capaR	FBgn0010423	TpnC47D					FBgn0031037	CG14207	FBgn0003209	raw	FBgn0034405	Jheh2	FBgn0032660	elfless	FBgn0259241	CG42339	FBgn0023550	CG18031	FBgn0036939	CG7365	FBgn0000079	Amy-p
FBgn0032450	CG5776	FBgn0030000	CG2260	FBgn0086898	dgo	FBgn0031224	CG11454	FBgn0032671	CG7200	FBgn0024509	sec13	FBgn0045866	bai	FBgn0030683	CG8239	FBgn0033194	Vps13	FBgn0033579	CG13229	FBgn0039873	Smvt	FBgn0033107	koi	FBgn0031824	CG9547	FBgn0038326	CG5044	FBgn0035632	Ppat-Dpck					FBgn0032949	Lamp1	FBgn0033708	CG8850	FBgn0031099	CG17065	FBgn0034081	CG10731	FBgn0029924	CG4586	FBgn0034438	CG9416	FBgn0001216	Hsc70-1	FBgn0036465	Rpn12R
FBgn0030894	CG7192	FBgn0028744	CG5033	FBgn0015270	Orc2	FBgn0031287	CG4291	FBgn0028500	Rich	FBgn0261609	eIF-2alpha	FBgn0001235	hth	FBgn0036147	Plod	FBgn0051708	CG31708	FBgn0030345	CG1847	FBgn0035293	CG5687	FBgn0002571	Mal-A3	FBgn0035911	CG6638	FBgn0039641	CG14511	FBgn0042101	CG18744					FBgn0032935	CG8678	FBgn0036107	CG7949	FBgn0053260	CG33260	FBgn0086901	cv-c	FBgn0033121	Cyp6u1	FBgn0010217	ATPsyn-beta	FBgn0036834	CG6836	FBgn0010612	l(2)06225
FBgn0032204	CG4953	FBgn0031148	Cbs	FBgn0030969	CG7288	FBgn0039626	Slu7	FBgn0019936	RpS20	FBgn0001320	kni	FBgn0085220	CG34191	FBgn0051915	CG31915	FBgn0051814	CG31814	FBgn0052649	CG32649	FBgn0024997	CG2681	FBgn0032381	Mal-B1	FBgn0024556	EfTuM	FBgn0038098	CG7381	FBgn0029854	CG3566					FBgn0028688	Rpn7	FBgn0028691	Rpn9	FBgn0031717	Oscillin	FBgn0027546	CG4766	FBgn0015040	Cyp9c1	FBgn0033086	CG9410	FBgn0004507	GlyP	FBgn0031941	CG7211
FBgn0035944	CG5021	FBgn0036272	CG4300	FBgn0026262	bip2	FBgn0039743	CG7946	FBgn0027525	CG7686	FBgn0001323	knrl	FBgn0001122	G-oalpha47A	FBgn0035936	Tsp66E	FBgn0031627	CG15630	FBgn0060296	pain	FBgn0034286	dpr13	FBgn0031770	CG13995	FBgn0028516	ZnT35C	FBgn0032053	mRpL51	FBgn0030511	CG11158					FBgn0052850	CG32850	FBgn0032787	CG10195	FBgn0031468	CG2975	FBgn0029003	mab-21	FBgn0262513	Vha16-4	FBgn0036440	CG17177	FBgn0035538	DopEcR	FBgn0034693	CG11073
FBgn0034802	CG3800	FBgn0037236	Skp2	FBgn0039189	CG18528	FBgn0011571	caz	FBgn0001565	Hlc	FBgn0033529	CG17765	FBgn0039902	CG2177	FBgn0036725	CG18265	FBgn0030300	Sk1	FBgn0037513	pyd3	FBgn0038282	dpr9	FBgn0027106	inx7	FBgn0028663	VhaM9.7-b	FBgn0036210	CG14130	FBgn0010516	wal					FBgn0259741	CG42395	FBgn0016081	fry	FBgn0031469	CG18558	FBgn0033240	CG2906	FBgn0003996	w	FBgn0044511	mRpS21	FBgn0038662	CG14290	FBgn0259729	CG42383
FBgn0035704	CG10144	FBgn0038491	CG5292	FBgn0033551	CG7222	FBgn0027783	SMC2	FBgn0261387	CG17528	FBgn0023170	RpL39	FBgn0001075	ft	FBgn0039075	CG4393	FBgn0039883	RhoGAP100F	FBgn0016660	H15	FBgn0037908	dpr5	FBgn0038140	CG8784	FBgn0034940	CG16787	FBgn0038387	blp	FBgn0030394	Cpr11A					FBgn0015239	Hr78	FBgn0010288	Uch	FBgn0029913	Cht11	FBgn0039255	CG13646	FBgn0259150	CG42265	FBgn0035170	dpr20	FBgn0039525	CG5646	FBgn0034882	CG5398
FBgn0031479	Prx6005	FBgn0035838	ldbr	FBgn0038609	Nup43	FBgn0028926	NC2beta	FBgn0023514	CG14805	FBgn0031537	sec5	FBgn0261574	kug	FBgn0037956	CG6959	FBgn0036544	sff	FBgn0262018	CadN2	FBgn0261871	dpr2	FBgn0037100	capaR	FBgn0034214	CG6550	FBgn0037743	CG8412	FBgn0038974	CG5377					FBgn0011745	Arp87C	FBgn0036761	MED19	FBgn0035398	Cht7	FBgn0036648	CG4098	FBgn0259994	CG42492	FBgn0030723	dpr18	FBgn0038053	CG18549	FBgn0037900	CG5276
FBgn0033948	CG12863	FBgn0030456	CG4332	FBgn0033017	CG10465	FBgn0037550	CG9667	FBgn0052372	ltl	FBgn0038369	Arpc3A	FBgn0038381	CG3303	FBgn0051118	RabX4	FBgn0025391	Scgdelta	FBgn0032940	Mio	FBgn0032433	Oatp33Ea	FBgn0041181	TepIII	FBgn0026741	mRpL18	FBgn0083968	CG34132	FBgn0038858	CG5793					FBgn0039632	Cul-5	FBgn0037819	CG14688	FBgn0035692	CG13298	FBgn0030545	CG11590	FBgn0039518	CG13978	FBgn0032233	dpr19	FBgn0010217	ATPsyn-beta	FBgn0030247	CG15208
FBgn0030039	CG12123	FBgn0086711	mol	FBgn0036538	CG15715	FBgn0032149	CG4036	FBgn0040394	CG16903	FBgn0024362	CG11412	FBgn0036573		FBgn0020910	RpL3	FBgn0028481	CG4341	FBgn0034070	SP2353	FBgn0032435	Oatp33Eb	FBgn0013343	Syx1A	FBgn0016041	Tom40	FBgn0033591	CG13216	FBgn0034390	CG15093					FBgn0035964	Dhpr	FBgn0037758	CG9467	FBgn0028932	CG16890	FBgn0015075	Ddx1	FBgn0004118	nAcRbeta-96A	FBgn0029974	dpr14	FBgn0000567	Eip74EF	FBgn0035497	CG14995
FBgn0033810	CG4646	FBgn0038118	timeout	FBgn0036537	CG18081	FBgn0035162	CG13900	FBgn0040318	HGTX	FBgn0035854	CG8005	FBgn0015298	Srp19	FBgn0034145	CG5065	FBgn0051690	CG31690	FBgn0051956	pgant4	FBgn0044872	FucTC	FBgn0039429	CG14238	FBgn0004926	eIF-2beta	FBgn0028648	mRpL50	FBgn0039747	AdoR					FBgn0004687	Mlc-c	FBgn0037801	CG3999	FBgn0036685	CG6664	FBgn0044020	Roc2	FBgn0000024	Ace	FBgn0085414	dpr12	FBgn0001989	l(2)35Di	FBgn0051414	CG31414
FBgn0029980	CG10778	FBgn0030969	CG7288	FBgn0031252	CG13690	FBgn0260400	elav	FBgn0037241	CG14646	FBgn0026417	Hus1-like	FBgn0261509	haf	FBgn0034142	CG8306	FBgn0034025	GalNAc-T1	FBgn0035498	Fit1	FBgn0005278	Sam-S	FBgn0043005	prt	FBgn0038893	CG6353	FBgn0262468	vib							FBgn0027363	Stam	FBgn0028399	TMS1	FBgn0052243	CG32243	FBgn0039411	dys	FBgn0039851	mey	FBgn0052600	dpr8	FBgn0037895	CG6723	FBgn0039358	CG5028
FBgn0011289	TfIIA-L	FBgn0004795	retn	FBgn0034264	CG10933	FBgn0052318	CG32318	FBgn0004584	Rrp1	FBgn0030676	CG12379	FBgn0260987	vtd	FBgn0023519	mRpL16	FBgn0027558	pgant3	FBgn0036688	Fit2	FBgn0031865	Nha1	FBgn0035331	DmsR-1	FBgn0259242	CG42340	FBgn0037566	mRpL1							FBgn0035300	CG1139	FBgn0039061	Ir	FBgn0260753	Pdfr	FBgn0058196	Maf1	FBgn0039852	nyo	FBgn0260995	CG42596	FBgn0261561	CG42675	FBgn0034105	CG7755
FBgn0032901	sky	FBgn0033551	CG7222	FBgn0025807	Rad9	FBgn0011817	nmo	FBgn0033556	CG12343	FBgn0014029	2013-09-02	FBgn0051800	CG31800	FBgn0029095	aru	FBgn0261862	whd	FBgn0031955	CG14535	FBgn0051052		FBgn0033579	CG13229	FBgn0260971	CG42594	FBgn0019925	Surf4							FBgn0030816	CG16700	FBgn0026380	Prosbeta3	FBgn0034418	CG15118	FBgn0033154	CG1850	FBgn0039704	neo	FBgn0053512	dpr4	FBgn0001624	dlg1	FBgn0038922	CG6439
FBgn0015000	betaggt-I	FBgn0259212	cno	FBgn0033994	CG7544	FBgn0025457	Bub3	FBgn0011016	SsRbeta	FBgn0033375	CG8078	FBgn0031530	pgant2	FBgn0030887	CG6867	FBgn0086359	Invadolysin	FBgn0004117	Tm2	FBgn0086450	su(r)	FBgn0015324	Vha26	FBgn0038042	Scgbeta	FBgn0015324	Vha26							FBgn0034032	CG8195	FBgn0015283	Pros54	FBgn0032923	CG9248	FBgn0033834	CG4744	FBgn0029128	tyn	FBgn0053481	dpr7	FBgn0023540	CG3630	FBgn0035924	CG6576
FBgn0036184	PCID2	FBgn0032051	CG13097	FBgn0031043	CG14222	FBgn0015834	Trip1	FBgn0032321	YL-1	FBgn0031781	Arc-p20	FBgn0024183	vig	FBgn0037094	CG7611	FBgn0032437	CR17024	FBgn0261341	verm	FBgn0037697	CG9363	FBgn0262018	CadN2	FBgn0004168	5-HT1A	FBgn0033816	CG4679							FBgn0028684	Tbp-1	FBgn0011230	poe	FBgn0085484	CG34455	FBgn0031760	Tsp26A	FBgn0085395	Shawl	FBgn0261871	dpr2	FBgn0085431	CG34402	FBgn0037759	CG8526
FBgn0038046	CG5641	FBgn0002022	Catsup	FBgn0019949	Cdk9	FBgn0013469	klu	FBgn0031673	CG31650	FBgn0003008	or	FBgn0261800	LanB1	FBgn0259923	2013-09-04	FBgn0033524	Cyp49a1	FBgn0260653	serp	FBgn0259111	Ndae1	FBgn0032940	Mio	FBgn0004573	5-HT7	FBgn0028327	l(1)G0320							FBgn0013770	Cp1	FBgn0037612	CG8112	FBgn0034246	Dcr-2	FBgn0031319	CG4896	FBgn0034985	CG3328	FBgn0040726	dpr	FBgn0034618	CG9485	FBgn0051773	CG31773
FBgn0051184	LSm3	FBgn0033017	CG10465	FBgn0011570	cpb	FBgn0035761	RhoGEF4	FBgn0025682	scf	FBgn0003513	ss	FBgn0032997	CG17486	FBgn0001311	kkv	FBgn0052635	Neto	FBgn0052499	Cda4	FBgn0051058	CG31058	FBgn0036359	CG14105	FBgn0011582	DopR	FBgn0038808	Srp14							FBgn0085378	CG34349	FBgn0033775	Cyp9h1	FBgn0259714	CG42368	FBgn0027568	Cand1	FBgn0038412	Zip3	FBgn0036732	Oatp74D	FBgn0001297	kay	FBgn0034415	CG15116
FBgn0033206	CG12042	FBgn0036538	CG15715	FBgn0029714	CG3527	FBgn0261930	vnd	FBgn0037026	CG3634	FBgn0025790	TBPH	FBgn0037838	CG4089	FBgn0023441	fus	FBgn0030186	CG2962	FBgn0030964	Pvf1	FBgn0004852	Ac76E	FBgn0035498	Fit1	FBgn0001248	Idh	FBgn0025837	CG17636							FBgn0030545	CG11590	FBgn0031432	Cyp309a1	FBgn0032451	spict	FBgn0031100	CG1504	FBgn0035142	hipk	FBgn0085384	CG34355	FBgn0031912	CG5261	FBgn0034202	CG17287
FBgn0000147	aur	FBgn0036537	CG18081	FBgn0050122	CG30122	FBgn0037255	Fip1	FBgn0038861	CG7009	FBgn0050342	Prp38	FBgn0031736	CG11030	FBgn0033699	RpS11	FBgn0051626	CG31626	FBgn0020307	dve	FBgn0260463	Unc-115b	FBgn0031955	CG14535	FBgn0025709	CG8083	FBgn0052069	CG32069							FBgn0044020	Roc2	FBgn0024238	Fim	FBgn0030485	CG1998	FBgn0038590	CG12320	FBgn0052461	CG32461	FBgn0037857	Tengl4	FBgn0010226	GstS1	FBgn0032090	CG9582
FBgn0029857	wuho	FBgn0035489		FBgn0050105	CG30105	FBgn0029629	CG8636	FBgn0032915	CG12050	FBgn0032793	CG10189	FBgn0028996	onecut	FBgn0032692	CG15161	FBgn0030541	CG11584	FBgn0036698	CG7724	FBgn0051352	Unc-115a	FBgn0053094	Synd	FBgn0033317	CG8635	FBgn0001098	Gdh							FBgn0037279	CG1129	FBgn0003996	w	FBgn0046247	CG5938	FBgn0032638	CG6639	FBgn0034391	CG15080	FBgn0033690	EndoG	FBgn0016691	Oscp	FBgn0004888	Scsalpha
FBgn0034722	Rtf1	FBgn0031252	CG13690	FBgn0082598	akirin	FBgn0034734	CG4554	FBgn0021874	Nle	FBgn0035909	ergic53	FBgn0023213	eIF4G	FBgn0029807	CG3108	FBgn0011828	Pxn	FBgn0259227	CG42327	FBgn0032116	CG3759	FBgn0053474	CG33474	FBgn0039757	RpS7	FBgn0034579	mRpL54							FBgn0033476	oys	FBgn0014427	CG11899	FBgn0262103	Sik3	FBgn0031470	CG18557	FBgn0085387	shakB	FBgn0010240	Lcch3	FBgn0039689	CG7598	FBgn0038708	CG6255
FBgn0033995	CG8090	FBgn0031895	CG4497	FBgn0030151	CG1354	FBgn0010173	RpA-70	FBgn0010194	Wnt5	FBgn0010078	RpL23	FBgn0011771	Hem	FBgn0029804	CG3097	FBgn0032685	CG10211	FBgn0033214	CG1941	FBgn0028662	VhaPPA1-1	FBgn0039045	CG17119	FBgn0050349	CG30349	FBgn0037718	P58IPK							FBgn0026084	cib	FBgn0039010	CG4907	FBgn0023001	melt	FBgn0033320	CG8586	FBgn0031239	CG17075	FBgn0031099	CG17065	FBgn0039040	CG13833	FBgn0030883	CG7772
FBgn0086908	egg	FBgn0028974	xmas-2	FBgn0026375	RhoGAPp190	FBgn0003261	Rm62	FBgn0000492	Dr	FBgn0031454	CG9960	FBgn0015838	Vang	FBgn0015589	Apc	FBgn0036836	CG11619	FBgn0035756	unc-13-4A	FBgn0035770	pst	FBgn0033214	CG1941	FBgn0002626	RpL32	FBgn0004363	porin							FBgn0016697	Prosalpha5	FBgn0034997	CG3376	FBgn0003520	stau	FBgn0032213	CG5390	FBgn0039641	CG14511	FBgn0261262	CG42613	FBgn0050021	metro	FBgn0011288	Snap25
FBgn0030063	CG1789	FBgn0011327	Uch-L3	FBgn0261792	snRNP-U1-C	FBgn0011715	Snr1	FBgn0037728	CG16817	FBgn0026402	NiPp1	FBgn0085409	CG34380	FBgn0032811	CG10268	FBgn0035039	CG3608	FBgn0031322	CG5001	FBgn0016075	vkg	FBgn0016013	Faa	FBgn0035335	mRpL23	FBgn0034197	Cda9							FBgn0031760	Tsp26A	FBgn0052845	CG32845	FBgn0035767	CG8596	FBgn0058160	CG40160	FBgn0040513	kappaB-Ras	FBgn0085426	Rgk3	FBgn0031261	nAcRbeta-21C	FBgn0033031	CG8245
FBgn0032732	CG15168	FBgn0031043	CG14222	FBgn0262601	SmB	FBgn0036754	CG5589	FBgn0011741	Actr13E	FBgn0051229	CG31229	FBgn0260966		FBgn0035771	sec63	FBgn0030529	Clic	FBgn0002522	lab	FBgn0000299	Cg25C	FBgn0036116	CG7888	FBgn0031294	IA-2	FBgn0035064	CG16912							FBgn0039269	veli	FBgn0036448	mop	FBgn0000455	Dip-C	FBgn0037956	CG6959	FBgn0035308	CG15822	FBgn0042696	NfI	FBgn0029137	Patsas	FBgn0029648	CG3603
FBgn0017549	Ric	FBgn0025864	Crag	FBgn0002431	hyd	FBgn0025571	SF1	FBgn0029885	CG3224	FBgn0037899	RpL24-like	FBgn0261444	CG3638	FBgn0004606	zfh1	FBgn0261552	ps	FBgn0032456	MRP	FBgn0013949	Ela	FBgn0033760	CG8785	FBgn0028833	Dak1	FBgn0051133	Slimp							FBgn0034688	CG11474	FBgn0086346	ALiX	FBgn0035392	CG1271	FBgn0034897	Sesn	FBgn0039379	CG5886	FBgn0033274	CG14757	FBgn0003149	Prm	FBgn0051546	CG31546
FBgn0031068	Alr	FBgn0037093	Cdk12	FBgn0030674	CG8184	FBgn0003559	su(f)	FBgn0037543	CG10903	FBgn0034001	mRpL41	FBgn0050394	CG30394	FBgn0052654	Sec16	FBgn0026721	fat-spondin	FBgn0035719	tow	FBgn0004575	Syn	FBgn0030816	CG16700	FBgn0053517	D2R	FBgn0013308	Odc2							FBgn0015794	Rab-RP4	FBgn0016126	CaMKI	FBgn0037140	CG7442	FBgn0038221	CG3259	FBgn0041629	Hexo2	FBgn0051058	CG31058	FBgn0013563	Pex1	FBgn0003360	sesB
FBgn0010380	Bap	FBgn0019949	Cdk9	FBgn0023511	Edem1	FBgn0031194	CG17598	FBgn0033485	RpLP0-like	FBgn0038603	PKD	FBgn0001218	Hsc70-3	FBgn0054056	CG34056	FBgn0034446	CG7735	FBgn0030752	CG9947	FBgn0259245	CG42343	FBgn0085378	CG34349	FBgn0027080	Aats-tyr	FBgn0085261	CG34232							FBgn0016700	Rab1	FBgn0039637	CG11880	FBgn0014010	Rab5	FBgn0023550	CG18031	FBgn0028468	rtet	FBgn0039387	MCO3	FBgn0029868	CG3446	FBgn0086784	stmA
FBgn0040078	pont	FBgn0011570	cpb	FBgn0037958	CG6962	FBgn0250911	CG42245	FBgn0039977	CG17454	FBgn0026585		FBgn0040007	RpL38	FBgn0033271	CG8708	FBgn0001319	kn	FBgn0031100	CG1504	FBgn0039617	CG14521	FBgn0035756	unc-13-4A	FBgn0024183	vig	FBgn0028479	Mtpalpha							FBgn0028514	CG4793	FBgn0038412	Zip3	FBgn0086370	sra	FBgn0033885	DJ-1alpha	FBgn0052568	CG32568	FBgn0259247	laccase2	FBgn0036844	Mkp3	FBgn0054049	CG34049
FBgn0051961	CG31961	FBgn0050122	CG30122	FBgn0035726	CG9953	FBgn0031993	Piezo	FBgn0034057	CG8314	FBgn0022224	ubl	FBgn0034059	CG8320	FBgn0032031	CG13390	FBgn0051694	CG31694	FBgn0036196	CG11658	FBgn0051646	CG31646	FBgn0031322	CG5001	FBgn0037529	mRpS9	FBgn0037842	CG6567							FBgn0032639	CG18563	FBgn0035142	hipk	FBgn0085520	CG40801	FBgn0031442	Prosbeta4R1	FBgn0038795	CG4335	FBgn0010226	GstS1	FBgn0030053	CG12081	FBgn0031407	CG4270
FBgn0024182	waw	FBgn0260859	Bet3	FBgn0032864	CG2493	FBgn0037469	Dpck	FBgn0033474	CG1407	FBgn0086683	Spf45	FBgn0033539	Git	FBgn0004449	Ten-m	FBgn0050446	Tdc2	FBgn0037627	CG13318	FBgn0051814	CG31814	FBgn0032456	MRP	FBgn0064117	CG33714	FBgn0026409	Mpcp							FBgn0031471	CG3117	FBgn0259168	mnb	FBgn0250791	Snap	FBgn0051638	CG31638	FBgn0085638	CG41378	FBgn0037690	Task7	FBgn0087012	5-HT2	FBgn0033184	CG12736
FBgn0002707	mei-9	FBgn0050105	CG30105	FBgn0024326	Mkk4	FBgn0010602	lwr	FBgn0023081	gek	FBgn0031909	CG5181	FBgn0039291	CG13663	FBgn0259240	Ten-a	FBgn0000075	amd	FBgn0036612	CG4998	FBgn0052683	CG32683	FBgn0030752	CG9947	FBgn0037602	CG8021	FBgn0033100	CG3420							FBgn0058160	CG40160	FBgn0036566	ClC-c	FBgn0033388	CG8046	FBgn0036568	CG5389	FBgn0260005	wtrw	FBgn0085425	CG34396	FBgn0037891	CG5214	FBgn0039430	CG5455
FBgn0033199	CG17985	FBgn0030151	CG1354	FBgn0038811	CG4159	FBgn0031631	CG3225	FBgn0037347	CG1427	FBgn0029133	REG	FBgn0038814	CG15923	FBgn0026403	Ndg	FBgn0010424	TpnC73F	FBgn0039249	CG11168	FBgn0004514	Oct-TyrR	FBgn0032243	Klp31E	FBgn0036774	mRpS26	FBgn0038302	CG4210							FBgn0261914		FBgn0034400	CG15099	FBgn0026189	prominin-like	FBgn0004638	drk	FBgn0001223	Hsp22	FBgn0031821	CG9542	FBgn0001263	inaD	FBgn0051860	CG31860
FBgn0034803	CG9849	FBgn0026375	RhoGAPp190	FBgn0010247	Parp	FBgn0001320	kni	FBgn0026064	KP78a	FBgn0262125	sec23	FBgn0031776	CG13993	FBgn0010747	Srp54k	FBgn0000711	flw	FBgn0033464	CG1441	FBgn0025391	Scgdelta	FBgn0034247	CG6484	FBgn0027575	GABA-B-R2	FBgn0011787	mRpL12							FBgn0032445	CG6153	FBgn0050359	Mal-A5	FBgn0031897	CG13784	FBgn0023531	CG32809	FBgn0001225	Hsp26	FBgn0050021	metro	FBgn0038404	CG8925	FBgn0034196	CG15605
FBgn0031312	Tango14	FBgn0031118	RhoGAP19D	FBgn0053116	CG33116	FBgn0001323	knrl	FBgn0024983	CG4293	FBgn0010812	unc-45	FBgn0011277	HLH4C	FBgn0036381	CG8745	FBgn0035103	Vdup1	FBgn0034143	CG8303	FBgn0028481	CG4341	FBgn0032729	CG10639	FBgn0024941	RSG7	FBgn0010638	Sec61beta							FBgn0036805	Chmp1	FBgn0037533	CD98hc	FBgn0003660	Syb	FBgn0039920	CG11360	FBgn0001229	Hsp67Bc	FBgn0032205	CG4957	FBgn0033778	CG3790	FBgn0037613	Cks85A
FBgn0035713	CG10107	FBgn0036850	Gem2	FBgn0032796	CG10188	FBgn0033389	Rad51C	FBgn0010313	corto	FBgn0259712	CG42366	FBgn0024811	Crk	FBgn0039043	CG17121	FBgn0037519	CG3014	FBgn0036279	Ncc69	FBgn0052483	CG32483	FBgn0010350	CdsA	FBgn0259927	CG42450	FBgn0034727	mRpS29							FBgn0029783	Sirt4	FBgn0000308	chic	FBgn0040660	CG13551	FBgn0082582	tmod	FBgn0001227	Hsp67Ba	FBgn0029137	Patsas	FBgn0004028	wupA	FBgn0025642	CG32812
FBgn0030420	CG12717	FBgn0261792	snRNP-U1-C	FBgn0035383	CG2107	FBgn0039306	CG11859	FBgn0022349	CG1910	FBgn0036819	dysb	FBgn0014417	CG13397	FBgn0261873	sdt	FBgn0262350		FBgn0034436	CG11961	FBgn0025592	Gyk	FBgn0037536	CG2698	FBgn0034427	CG10474	FBgn0051450	mRpS18A							FBgn0040493	grsm	FBgn0035146	CG13893	FBgn0040271	Sulf1	FBgn0031765	CG9109	FBgn0262018	CadN2	FBgn0033426	CG1814	FBgn0034420	CG10737	FBgn0260758	CG42556
FBgn0036428	CG9238	FBgn0262601	SmB	FBgn0032938	CG8671	FBgn0031868	Rat1	FBgn0039137	CG13604	FBgn0032799	CG10166	FBgn0002780	mod	FBgn0036298	nst	FBgn0032436	CG5418	FBgn0038466	CG8907	FBgn0036759	CG5577	FBgn0030218	CG1628	FBgn0037057	CG10512	FBgn0039111	Plip							FBgn0038053	CG18549	FBgn0034071	CG8405	FBgn0052971	CG32971	FBgn0032233	dpr19	FBgn0038247	Cad88C	FBgn0025628	CG4199	FBgn0031684	CG8680	FBgn0030101	CG12118
FBgn0003415	skd	FBgn0038421	CG17931	FBgn0038332	CG6136	FBgn0038369	Arpc3A	FBgn0028664	VhaM9.7-c	FBgn0030289	CG1597	FBgn0259214	PMCA	FBgn0020379	Rfx	FBgn0030510	CG12177	FBgn0030052	CG12065	FBgn0036760	CG5567	FBgn0051547	CG31547	FBgn0030177	CG2972	FBgn0039835	mRpL32							FBgn0032596	CG17331	FBgn0035348	CG16758	FBgn0000529	bsh	FBgn0085414	dpr12	FBgn0039294	Cad96Cb	FBgn0033608	CG13220	FBgn0019644	ATPsyn-b	FBgn0038458	VhaM9.7-d
FBgn0038039	CG5196	FBgn0014411	Vps26	FBgn0015024	CkIalpha	FBgn0035854	CG8005	FBgn0037816	CG6345	FBgn0046685	Wsck	FBgn0028999	nerfin-1	FBgn0031879	uif	FBgn0030992	CG33253	FBgn0038641	CG7708	FBgn0063649	CG6006	FBgn0050043	CG30043	FBgn0031357	mRpL48	FBgn0051648	CG31648							FBgn0053013	CR33013	FBgn0014020	Rho1	FBgn0035995	CG3529	FBgn0260995	CG42596	FBgn0030503	Tango2	FBgn0259245	CG42343	FBgn0030478	CG1640	FBgn0035032	CG4692
FBgn0039489	CG5880	FBgn0002431	hyd	FBgn0040297	Nhe2	FBgn0026417	Hus1-like	FBgn0001075	ft	FBgn0010803	Aats-trp	FBgn0005648	Pabp2	FBgn0025625	Sik2	FBgn0085391	CG34362	FBgn0053124	CG33124	FBgn0030005	CG2120	FBgn0050049	CG30049	FBgn0086913	Rab26	FBgn0034500	CG11200							FBgn0039969	Fis1	FBgn0014380	RhoL	FBgn0039155	Kal1	FBgn0037296	Prosbeta2R2	FBgn0034135	Syn2	FBgn0058378	CG40378	FBgn0086359	Invadolysin	FBgn0036702	CG6512
FBgn0038049	CG5844	FBgn0023511	Edem1	FBgn0015721	king-tubby	FBgn0014029	2013-09-02	FBgn0000497	ds	FBgn0032746	CG10470	FBgn0037758	CG9467	FBgn0262139	trh	FBgn0052406	CG32406	FBgn0051668	CG31668	FBgn0260866	dnr1	FBgn0050047	CG30047	FBgn0004403	RpS14a	FBgn0042083	CG3267							FBgn0035165	CG13887	FBgn0041182	TepII	FBgn0032922	CG9249	FBgn0044872	FucTC	FBgn0086408	stl	FBgn0053543	CG33543	FBgn0033387	CG8008	FBgn0019960	CG6455
FBgn0032169	CG4709	FBgn0037958	CG6962	FBgn0033169	CG11123	FBgn0031781	Arc-p20	FBgn0261574	kug	FBgn0039052	CG6733	FBgn0002526	LanA	FBgn0259228	C3G	FBgn0029820	CG16721	FBgn0029950	CG9657	FBgn0050158	CG30158	FBgn0033720	CG13160	FBgn0033079	Fmo-2	FBgn0001092	Gapdh2							FBgn0028687	Rpt1	FBgn0041183	TepI	FBgn0024179	wit	FBgn0015589	Apc	FBgn0053094	Synd	FBgn0260750	Mulk	FBgn0039667	CG2010	FBgn0032229	CG5045
FBgn0034650	NC2alpha	FBgn0035726	CG9953	FBgn0031437	p16-ARC	FBgn0025790	TBPH	FBgn0038381	CG3303	FBgn0039053	CG6738	FBgn0261563	wb	FBgn0001995	mRpL4	FBgn0034136	DAT	FBgn0034286	dpr13	FBgn0032437	CR17024	FBgn0034436	CG11961	FBgn0051191	CG31191	FBgn0030552	mRpL38							FBgn0000567	Eip74EF	FBgn0037363	CG1347	FBgn0050456	CG30456	FBgn0259986	nab	FBgn0052850	CG32850	FBgn0032850	Kua	FBgn0052635	Neto	FBgn0004435	Galpha49B
FBgn0250786	Chd1	FBgn0032864	CG2493	FBgn0000996	dup	FBgn0050342	Prp38	FBgn0086605	CG9853	FBgn0030305	CG1749	FBgn0005585	Crc	FBgn0051690	CG31690	FBgn0261259	Fhos	FBgn0037993	dpr15	FBgn0036806	Cyp12c1	FBgn0034437	CG10051	FBgn0036934	sNPF-R	FBgn0032729	CG10639							FBgn0032350	CG6287	FBgn0031939	CG13796	FBgn0031968	CG7231	FBgn0031099	CG17065	FBgn0032598	ChLD3	FBgn0032879	CG9317	FBgn0010808	l(3)03670	FBgn0030087	CG7766
FBgn0023395	Chd3	FBgn0261524	lic	FBgn0051223	CG31223	FBgn0011666	msi	FBgn0052075	CG32075	FBgn0031049	Sec61gamma	FBgn0015622	Cnx99A	FBgn0051823	CG31823	FBgn0010704	l(2)s5379	FBgn0053202	dpr11	FBgn0051321	CG31321	FBgn0053653	Caps	FBgn0037408	NPFR1	FBgn0038923	mRpL35							FBgn0036571	CG12272	FBgn0261671	tweek	FBgn0033949	CG10131	FBgn0053260	CG33260	FBgn0040056	CG17698	FBgn0033778	CG3790	FBgn0034588	CG9394	FBgn0031995	CG8475
FBgn0050497	CG30497	FBgn0010247	Parp	FBgn0086451	l(2)k09022	FBgn0004237	Hrb87F	FBgn0050349	CG30349	FBgn0033691	CG8860	FBgn0042650	disco-r	FBgn0027558	pgant3	FBgn0051140	CG31140	FBgn0038282	dpr9	FBgn0052564	CG32564	FBgn0038466	CG8907	FBgn0037608	mRpL19	FBgn0039094	CG10184							FBgn0023174	Prosbeta2	FBgn0004897	fd96Ca	FBgn0024806	DIP2	FBgn0032429	CG5446	FBgn0032707	CG10348	FBgn0004028	wupA	FBgn0031830	CoVb	FBgn0260481	CG32454
FBgn0040020	MED21	FBgn0028919	CG16865	FBgn0086707	ncm	FBgn0001215	Hrb98DE	FBgn0032020	CG7787	FBgn0261619	pAbp	FBgn0000459	disco	FBgn0037537	CG2767			FBgn0052057	dpr10	FBgn0038734	CG11453	FBgn0034951	CG3860	FBgn0025885	Inos	FBgn0019830	colt							FBgn0050277	Oatp58Da	FBgn0040285	Scamp	FBgn0037972	CG10005	FBgn0054056	CG34056	FBgn0000108	Appl	FBgn0036153	CG7573	FBgn0038733	CG11407	FBgn0033074	tomboy40
FBgn0032444	CG5525	FBgn0010590	Prosbeta1	FBgn0010926	l(3)07882	FBgn0086897		FBgn0051800	CG31800	FBgn0033272	RagC	FBgn0040512	zetaCOP	FBgn0033524	Cyp49a1			FBgn0037908	dpr5	FBgn0035006	CG4563	FBgn0035610	Lkr	FBgn0030616	RpL37a	FBgn0039406	RpL34a							FBgn0259986	nab	FBgn0028992	sds22	FBgn0039690	CG1969	FBgn0031469	CG18558	FBgn0038280	CG14861	FBgn0050158	CG30158	FBgn0038732	CG11391	FBgn0038355	CG4520
FBgn0034933	CG3735	FBgn0030067	Rbm13	FBgn0026150	ApepP	FBgn0032793	CG10189	FBgn0034572	CG9346	FBgn0032749	Phlpp	FBgn0038976	CG7048	FBgn0033753	Cyp301a1			FBgn0261871	dpr2	FBgn0037996	CG4830	FBgn0030052	CG12065	FBgn0031116	CG1695	FBgn0039357	CG4743							FBgn0038535	alt	FBgn0037721	CG9427	FBgn0011577		FBgn0033716	Den1	FBgn0034081	CG10731	FBgn0033985	CG10257	FBgn0034552	CG17999	FBgn0037001	CG6020
FBgn0261064	Rbsn-5	FBgn0035383	CG2107	FBgn0032816	Nf-YB	FBgn0030701	CG16952	FBgn0030136	RpS28b	FBgn0261068	LSm7	FBgn0004797	mdy	FBgn0030186	CG2962			FBgn0260486	CG42533	FBgn0034553	CG9993	FBgn0038641	CG7708	FBgn0052506	CG32506	FBgn0050049	CG30049							FBgn0033543	CG12338	FBgn0085638	CG41378	FBgn0037856	CG4674	FBgn0032522	CG16848	FBgn0086901	cv-c	FBgn0039667	CG2010	FBgn0029843	Nep1	FBgn0035404	CG12079
FBgn0026175	skpC	FBgn0032938	CG8671	FBgn0037930	CG14715	FBgn0026402	NiPp1	FBgn0083992	Mkp	FBgn0039876	CG2126	FBgn0040022	Set1	FBgn0011828	Pxn			FBgn0032435	Oatp33Eb	FBgn0040363	CG11384	FBgn0053124	CG33124	FBgn0036825	RpL26	FBgn0050047	CG30047							FBgn0031717	Oscillin	FBgn0060296	pain	FBgn0037465	CG1105	FBgn0031513	CG3347	FBgn0027546	CG4766	FBgn0052635	Neto	FBgn0032593	trpgamma	FBgn0030839	CG5613
FBgn0038427	ema	FBgn0002413	dco	FBgn0027588	CG14476	FBgn0026585		FBgn0034086	CG8441	FBgn0019936	RpS20	FBgn0047135	CG32276	FBgn0032685	CG10211			FBgn0034797	nahoda	FBgn0032442	CG15485	FBgn0037895	CG6723	FBgn0022023	eIF-3p40	FBgn0034441	CG10081							FBgn0029913	Cht11	FBgn0001224	Hsp23	FBgn0028993	scro	FBgn0035179	CG12038	FBgn0015772	Nak	FBgn0085452	CG34423	FBgn0047038	CG6463	FBgn0026136	CkIIbeta2
FBgn0064766	CG7600	FBgn0015024	CkIalpha	FBgn0000212	brm	FBgn0036000	CG3434	FBgn0036765	CG7408	FBgn0261387	CG17528	FBgn0037280	CG1126	FBgn0035039	CG3608			FBgn0085426	Rgk3	FBgn0037239	CG11739	FBgn0029950	CG9657	FBgn0015558	tty	FBgn0033720	CG13160							FBgn0041194	Prat2	FBgn0001226	Hsp27	FBgn0030993	Mec2	FBgn0036685	CG6664	FBgn0039255	CG13646	FBgn0250819	CG33521	FBgn0034446	CG7735	FBgn0033371	CNT1
FBgn0020248	stet	FBgn0033169	CG11123	FBgn0029903	pod1	FBgn0022224	ubl	FBgn0026324	Taf10b	FBgn0023514	CG14805	FBgn0038432	CG14883	FBgn0003425				FBgn0086450	su(r)	FBgn0034002	CG8079	FBgn0039873	Smvt	FBgn0004574	Rop	FBgn0034437	CG10051							FBgn0023175	Prosalpha7	FBgn0001229	Hsp67Bc	FBgn0014342	mia	FBgn0035891	Oseg1	FBgn0050491	CG30491	FBgn0031651	mRpL24	FBgn0037643	skap	FBgn0041605	cpx
FBgn0027087	Aats-his	FBgn0000996	dup	FBgn0046706	Haspin	FBgn0029133	REG	FBgn0036896	wnd	FBgn0015756	RpL9	FBgn0013751	Awh	FBgn0030686	mRpL3			FBgn0039282	Bili	FBgn0034194	CG15611	FBgn0039872	salt	FBgn0037121	Rpb8	FBgn0034951	CG3860							FBgn0036921	RhoGDI	FBgn0031037	CG14207	FBgn0033463	CG1513	FBgn0052243	CG32243	FBgn0261642	mbl	FBgn0022361	Pur-alpha	FBgn0038880	SIFR	FBgn0260004	Snmp1
FBgn0260779	gatA	FBgn0051223	CG31223	FBgn0032698	CG10336	FBgn0038597	CG8064	FBgn0038275	CG3817	FBgn0040394	CG16903	FBgn0052105	CG32105	FBgn0029709	CHOp24			FBgn0031468	CG2975	FBgn0030737	CG9914	FBgn0035293	CG5687	FBgn0029105	alpha-catenin-related	FBgn0044511	mRpS21							FBgn0036309	Hip1	FBgn0032935	CG8678	FBgn0030183	CG15309	FBgn0003353	sei	FBgn0052354	CG32354	FBgn0003861	trp	FBgn0033196	CG1358	FBgn0038984	CG5315
FBgn0024329	Mekk1	FBgn0086451	l(2)k09022	FBgn0034795	MED23	FBgn0033400	CG2063	FBgn0038462	CG17556	FBgn0038947	sar1	FBgn0004607	zfh2	FBgn0026721	fat-spondin			FBgn0031466	CG3119	FBgn0051221	CG31221	FBgn0024997	CG2681	FBgn0036337	CG11255	FBgn0053124	CG33124							FBgn0036740	CG6259	FBgn0032673	CG7180	FBgn0026749	Yippee	FBgn0038165	Task6	FBgn0032192	CG5731	FBgn0032593	trpgamma	FBgn0261611	CG42700	FBgn0085211	RpS28-like
FBgn0000182	BicC	FBgn0086707	ncm	FBgn0030790	CG4768	FBgn0010300	brat	FBgn0027504	CG8878	FBgn0040318	HGTX	FBgn0029147	NtR	FBgn0028369	kirre			FBgn0259111	Ndae1	FBgn0004619	Glu-RI	FBgn0035170	dpr20	FBgn0031639	mRpS2	FBgn0051668	CG31668							FBgn0262081	Csk	FBgn0028688	Rpn7	FBgn0039924	CG17471	FBgn0038626	CG7691	FBgn0039217	CG13627	FBgn0260008	Ucrh	FBgn0020235	ATPsyn-gamma	FBgn0031082	CG17003
FBgn0024994	Csat	FBgn0002441	l(3)mbt	FBgn0004698	mus210	FBgn0028552	gammaSnap	FBgn0027950	MBD-like	FBgn0038852	CG7056	FBgn0037374	jagn	FBgn0001319	kn			FBgn0035398	Cht7	FBgn0028431		FBgn0030723	dpr18	FBgn0023495	Lip3	FBgn0039872	salt							FBgn0029943	Atg5	FBgn0011745	Arp87C	FBgn0031489	CG17224	FBgn0035144	CG17181	FBgn0033834	CG4744	FBgn0027356	Amph	FBgn0032129	jp	FBgn0036328	CG10749
FBgn0040336	Seipin	FBgn0031310	CG4764	FBgn0032919	CG9253	FBgn0030289	CG1597	FBgn0261800	LanB1	FBgn0033556	CG12343	FBgn0039851	mey	FBgn0050291	CG30291			FBgn0039536	CG18437	FBgn0035244	ABCB7	FBgn0034286	dpr13	FBgn0033708	CG8850	FBgn0024997	CG2681							FBgn0036381	CG8745	FBgn0032731	CG10641			FBgn0260753	Pdfr	FBgn0030683	CG8239	FBgn0051774	fred	FBgn0004516	Gad1	FBgn0262559	Mdh2
FBgn0027052	CHIP	FBgn0010926	l(3)07882	FBgn0039487	gb	FBgn0032408	CG6712	FBgn0037802	Sirt6	FBgn0011016	SsRbeta	FBgn0039704	neo	FBgn0085437	CG34408			FBgn0051058	CG31058	FBgn0004516	Gad1	FBgn0085414	dpr12	FBgn0261090	Sytbeta	FBgn0037232	CG9791							FBgn0022774	Oat	FBgn0039632	Cul-5			FBgn0034418	CG15118	FBgn0035936	Tsp66E	FBgn0262509	nrm	FBgn0013348	TpnC41C	FBgn0036882	CG9279
FBgn0029911	CG14435	FBgn0026150	ApepP	FBgn0031145	Ntf-2	FBgn0033691	CG8860	FBgn0015513	mbc	FBgn0260940	lsn	FBgn0029128	tyn	FBgn0050446	Tdc2			FBgn0051352	Unc-115a	FBgn0259977	Tdc1	FBgn0037993	dpr15	FBgn0036853	mRpL21	FBgn0259149	CG42264							FBgn0024958	Irp-1A	FBgn0035964	Dhpr			FBgn0032923	CG9248	FBgn0031100	CG1504	FBgn0032922	CG9249	FBgn0033027	TpnC4	FBgn0028397	Tob
FBgn0261988	Gprk2	FBgn0037930	CG14715	FBgn0032600	CG17912	FBgn0038473	ns1	FBgn0004404	RpS14b	FBgn0031673	CG31650	FBgn0016126	CaMKI	FBgn0000075	amd			FBgn0032116	CG3759	FBgn0010423	TpnC47D	FBgn0053202	dpr11	FBgn0030662	CG9220	FBgn0029804	CG3097							FBgn0031992	CG8498	FBgn0259227	CG42327			FBgn0259714	CG42368	FBgn0036196	CG11658	FBgn0005536	Mbs	FBgn0031692	TpnC25D	FBgn0030733	CG3560
FBgn0031655	Marcal1	FBgn0030801	Rcp	FBgn0031782	WDR79	FBgn0004636	R	FBgn0036514	CG12301	FBgn0025682	scf	FBgn0002566	lt	FBgn0010411	RpS18			FBgn0026403	Ndg	FBgn0025803		FBgn0038282	dpr9	FBgn0030572	mRpS25	FBgn0023477	Tal							FBgn0043842	Yeti	FBgn0004687	Mlc-c			FBgn0030485	CG1998	FBgn0033320	CG8586	FBgn0038880	SIFR	FBgn0039360	CLS	FBgn0039576	CG17856
FBgn0030460	CG2453	FBgn0027588	CG14476	FBgn0024804	Dbp80	FBgn0023520	CG3857	FBgn0000556	Ef1alpha48D	FBgn0037026	CG3634	FBgn0032988	Tif-IA	FBgn0250789	alpha-Spec			FBgn0016075	vkg	FBgn0004167	kst	FBgn0052600	dpr8	FBgn0030878	CG6769	FBgn0032015	CG7830							FBgn0032200	CG5676	FBgn0027363	Stam			FBgn0025625	Sik2	FBgn0058160	CG40160	FBgn0039368	CG17196	FBgn0000667	Actn	FBgn0037970	CG12201
FBgn0039698	CG7789	FBgn0035960	CG4942	FBgn0039182	CG5728	FBgn0023509	mip130	FBgn0052409	CG32409	FBgn0038861	CG7009	FBgn0002528	LanB2	FBgn0028341	l(1)G0232			FBgn0000299	Cg25C	FBgn0250789	alpha-Spec	FBgn0052057	dpr10	FBgn0039219	CG13630	FBgn0004907	14-3-3zeta							FBgn0032005	Snx6	FBgn0027546	CG4766			FBgn0023001	melt	FBgn0261914		FBgn0039369	CG17195	FBgn0035625	Blimp-1	FBgn0042131	CG18808
FBgn0034614	CG9752	FBgn0000212	brm	FBgn0031224	CG11454	FBgn0032671	CG7200	FBgn0031736	CG11030	FBgn0038737	CG11447	FBgn0015773	NetA	FBgn0262350				FBgn0037917	wkd	FBgn0040299	Myo28B1	FBgn0037908	dpr5	FBgn0032430	CG6388	FBgn0010053	Jheh1							FBgn0031534	Snx1	FBgn0033240	CG2906			FBgn0032813	CG10262	FBgn0034897	Sesn	FBgn0034651	CG15676	FBgn0035600	CG4769	FBgn0038775	CG17199
FBgn0002924	ncd	FBgn0029903	pod1	FBgn0031287	CG4291	FBgn0038948	PSR	FBgn0037182	ArfGAP3	FBgn0021874	Nle	FBgn0015774	NetB	FBgn0262475	bru-2			FBgn0038165	Task6	FBgn0042104	CG18747	FBgn0053481	dpr7	FBgn0037801	CG3999	FBgn0034406	Jheh3							FBgn0026718	fu12	FBgn0033760	CG8785			FBgn0003520	stau	FBgn0038979	CG7046	FBgn0032129	jp	FBgn0017567	ND23	FBgn0034842	Prosbeta5R
FBgn0031106	Syx16	FBgn0046706	Haspin	FBgn0037081	barc	FBgn0038499	Brf	FBgn0034232	CG4866	FBgn0033502	CG12910	FBgn0023096	btv	FBgn0046114	Gclm			FBgn0085425	CG34396	FBgn0042102	CG18745	FBgn0261871	dpr2	FBgn0002607	RpL19	FBgn0031860	CG11236							FBgn0005634	zip	FBgn0030816	CG16700			FBgn0033236	CG14764	FBgn0038751	CG4770	FBgn0004910	Eip63F-1	FBgn0038293	CG6904	FBgn0033558	CG12344
FBgn0037482	CG10055	FBgn0053276	CG33276	FBgn0039626	Slu7	FBgn0039876	CG2126	FBgn0037270	CG9769	FBgn0010194	Wnt5	FBgn0037659	Kdm2	FBgn0032436	CG5418			FBgn0004575	Syn	FBgn0042103	CG18746	FBgn0040726	dpr	FBgn0032701	CG10341	FBgn0036173	CG7394							FBgn0052549	CG32549	FBgn0039111	Plip			FBgn0004583	ex	FBgn0033885	DJ-1alpha	FBgn0013348	TpnC41C	FBgn0031771	CG9140	FBgn0031021	CG12203
FBgn0031598	CG3338	FBgn0032723	ssp3	FBgn0261793	Trf2	FBgn0028500	Rich	FBgn0039116	CG10375	FBgn0000492	Dr	FBgn0034345	CG5174	FBgn0030992	CG33253			FBgn0033194	Vps13	FBgn0037517	CG10086	FBgn0260486	CG42533	FBgn0027610	Dic1	FBgn0003714	tko							FBgn0038446	CG14903	FBgn0028684	Tbp-1			FBgn0052944	CG32944	FBgn0031442	Prosbeta4R1	FBgn0033027	TpnC4	FBgn0053556	form3	FBgn0064119	CG33934
FBgn0030089	AP-1gamma	FBgn0052590	CG32590	FBgn0039743	CG7946	FBgn0004856	Bx42	FBgn0011771	Hem	FBgn0037728	CG16817	FBgn0004646	ogre	FBgn0032394	CG6746			FBgn0025628	CG4199	FBgn0042101	CG18744	FBgn0032433	Oatp33Ea	FBgn0039674	CG1907	FBgn0260468	CG7950							FBgn0036126	CG6272	FBgn0013770	Cp1			FBgn0026189	prominin-like	FBgn0053653	Caps	FBgn0031692	TpnC25D	FBgn0261439	SdhA	FBgn0260466	Indy-2
FBgn0027495	CG8378	FBgn0038853	RhoGAP93B	FBgn0004373	fwd	FBgn0030893	RhoGAP16F	FBgn0033187	CG2144	FBgn0038871	CG3337	FBgn0019650	toy	FBgn0004873				FBgn0259245	CG42343	FBgn0037853	CG14696	FBgn0032435	Oatp33Eb	FBgn0039081	Irk2	FBgn0032643	CG6453							FBgn0085377	CG34348	FBgn0085378	CG34349			FBgn0003660	Syb	FBgn0000567	Eip74EF	FBgn0032946	nrv3	FBgn0030610	CG9065	FBgn0032314	CG7309
FBgn0011566	Bzd	FBgn0037652	CG11980	FBgn0002183	dre4	FBgn0052372	ltl	FBgn0000576	ems	FBgn0260861	Trs23	FBgn0035676	CG6619	FBgn0085391	CG34362			FBgn0039617	CG14521	FBgn0036575	CG5157	FBgn0044872	FucTC	FBgn0025629	CG4045	FBgn0039877	CG2118							FBgn0052196	CG32196	FBgn0044020	Roc2			FBgn0052971	CG32971	FBgn0259923	2013-09-04	FBgn0029761	SK	FBgn0039635	CG11876	FBgn0036180	CG6091
FBgn0029942	CG2059	FBgn0033814	CG4670	FBgn0011571	caz	FBgn0040394	CG16903	FBgn0015838	Vang	FBgn0034913	usnp	FBgn0035308	CG15822	FBgn0036621	roq			FBgn0051708	CG31708	FBgn0040319	Gclc	FBgn0004907	14-3-3zeta	FBgn0002622	RpS3	FBgn0033038	CG7791							FBgn0033582	CG9084	FBgn0037279	CG1129			FBgn0024314	Plap	FBgn0023531	CG32809	FBgn0039360	CLS	FBgn0024963	GluClalpha	FBgn0032646	CG6412
FBgn0261014	TER94	FBgn0030790	CG4768	FBgn0027783	SMC2	FBgn0015615	Cap	FBgn0000320	eya	FBgn0037543	CG10903	FBgn0014020	Rho1	FBgn0086693	iav			FBgn0031725	CG14010	FBgn0020249	stck	FBgn0005278	Sam-S	FBgn0026761	Trap1	FBgn0039849	CG11334							FBgn0030300	Sk1	FBgn0033476	oys			FBgn0000529	bsh	FBgn0036440	CG17177	FBgn0032744	Ttc19	FBgn0002937	ninaB	FBgn0033069	CG8335
FBgn0003079	phl	FBgn0004698	mus210	FBgn0020756		FBgn0040318	HGTX	FBgn0085409	CG34380	FBgn0033907	mRpS16	FBgn0031937	CG13795	FBgn0024184	unc-4			FBgn0051646	CG31646	FBgn0260229	CG42503	FBgn0031865	Nha1	FBgn0022288	l(2)09851	FBgn0030612	CG5599							FBgn0035811	CG12262	FBgn0026084	cib			FBgn0039155	Kal1	FBgn0039920	CG11360	FBgn0035103	Vdup1			FBgn0037506	CG1287
FBgn0015402	ksr	FBgn0001180	hb	FBgn0028926	NC2beta	FBgn0037241	CG14646	FBgn0022023	eIF-3p40	FBgn0033485	RpLP0-like	FBgn0040395	Unc-76	FBgn0030600	hiw			FBgn0051814	CG31814	FBgn0052406	CG32406	FBgn0086450	su(r)	FBgn0027779	VhaSFD	FBgn0027091	Aats-cys							FBgn0033010	Atf6	FBgn0016697	Prosalpha5			FBgn0029082	hbs	FBgn0035426	CG12078	FBgn0037521	CG2993			FBgn0260634	eIF4G2
FBgn0027083	Aats-met	FBgn0031145	Ntf-2	FBgn0037550	CG9667	FBgn0004584	Rrp1	FBgn0032082	CG18088	FBgn0031980	RpL36A	FBgn0083968	CG34132	FBgn0039734	Tace			FBgn0031627	CG15630	FBgn0010414	SerT	FBgn0039282	Bili	FBgn0038007	Cyp313a3	FBgn0039349	Ssadh							FBgn0033605	CG9067	FBgn0031760	Tsp26A			FBgn0020378	Sp1	FBgn0082582	tmod	FBgn0032652	CG6870			FBgn0052847	CG32847
FBgn0029706	CG3626	FBgn0037202	Ssl1	FBgn0035162	CG13900	FBgn0033556	CG12343	FBgn0260966		FBgn0034057	CG8314	FBgn0020440	Fak56D	FBgn0051140	CG31140			FBgn0052683	CG32683	FBgn0051140	CG31140	FBgn0037697	CG9363	FBgn0022097	Vha36-1	FBgn0024957	Irp-1B							FBgn0030357	Sclp	FBgn0034688	CG11474			FBgn0024179	wit	FBgn0031765	CG9109	FBgn0260657	CG42540			FBgn0030670	Pis
FBgn0031456	Trn-SR	FBgn0027053	CSN5	FBgn0260962	pic	FBgn0034307	CG10914	FBgn0032138	CG4364	FBgn0033474	CG1407	FBgn0013955		FBgn0262126	gho			FBgn0039883	RhoGAP100F	FBgn0004244	Rdl	FBgn0259111	Ndae1	FBgn0040377	Vha36-3	FBgn0036135	mRpL2							FBgn0000455	Dip-C	FBgn0015794	Rab-RP4			FBgn0031968	CG7231	FBgn0001311	kkv	FBgn0259821	CG42402			FBgn0028844	CG15283
FBgn0261532	cdm	FBgn0039305	CG11858	FBgn0035194	Psf1	FBgn0033899	CG13016	FBgn0033912	RpS23	FBgn0039713	RpS8	FBgn0031829	osm-6	FBgn0031779	CG9175			FBgn0025391	Scgdelta	FBgn0039464	CG6330	FBgn0039536	CG18437	FBgn0014023	Rlc1	FBgn0031308	CG4749							FBgn0002716	mei-W68	FBgn0016700	Rab1			FBgn0261555	CG42673	FBgn0030723	dpr18	FBgn0030841	CG8568			FBgn0063485	Lasp
FBgn0039936	CG11148	FBgn0085436	Not1	FBgn0052318	CG32318	FBgn0260940	lsn	FBgn0037121	Rpb8	FBgn0037347	CG1427	FBgn0031494	CG17219	FBgn0250785	vari			FBgn0029768	SPR			FBgn0004852	Ac76E	FBgn0259150	CG42265	FBgn0031231	mRpL10							FBgn0086377	Syx7	FBgn0032638	CG6639			FBgn0035437	CG11526	FBgn0032233	dpr19	FBgn0261259	Fhos			FBgn0052985	CG32985
FBgn0028507	CG3793	FBgn0032600	CG17912	FBgn0011817	nmo	FBgn0032321	YL-1	FBgn0033378	tsu	FBgn0015521	RpS21	FBgn0034087	clu					FBgn0037646	CAHbeta			FBgn0051352	Unc-115a	FBgn0031514	CG3332	FBgn0032205	CG4957							FBgn0038404	CG8925	FBgn0032639	CG18563			FBgn0024806	DIP2	FBgn0029974	dpr14	FBgn0039993	CG17691			FBgn0032843	CG10730
FBgn0038649	CG7718	FBgn0031782	WDR79	FBgn0034646	Rae1	FBgn0031673	CG31650	FBgn0032264	Lip4	FBgn0037978	KLHL18	FBgn0039025	CG7023					FBgn0028481	CG4341			FBgn0044510	mRpS5	FBgn0038234	mRpL11	FBgn0011509	SrpRbeta							FBgn0033809	CG4630	FBgn0033321	CG8738			FBgn0011596	fzo	FBgn0085414	dpr12	FBgn0024963	GluClalpha			FBgn0035216	CG9168
FBgn0052226	Pex23	FBgn0052373	CG32373	FBgn0025457	Bub3	FBgn0017550	Rga	FBgn0024740	Lip2	FBgn0024983	CG4293	FBgn0026616	alpha-Man-IIb					FBgn0034025	GalNAc-T1			FBgn0032116	CG3759	FBgn0039233	CG7006	FBgn0033608	CG13220							FBgn0014010	Rab5	FBgn0058160	CG40160			FBgn0037972	CG10005	FBgn0037295	dpr16	FBgn0002937	ninaB			FBgn0032080	CG9525
FBgn0032934	CG8679	FBgn0024804	Dbp80	FBgn0015834	Trip1	FBgn0037026	CG3634	FBgn0029514	CG9166	FBgn0000117	arm	FBgn0020389	Papss					FBgn0050463	CG30463			FBgn0028662	VhaPPA1-1	FBgn0015519	nAcRalpha-7E	FBgn0052196	CG32196							FBgn0011672	Mvl	FBgn0261914				FBgn0011577		FBgn0037993	dpr15					FBgn0032964	CG11630
FBgn0031759	lid	FBgn0039182	CG5728	FBgn0036581	MED10	FBgn0038737	CG11447	FBgn0034059	CG8320	FBgn0036557	mRpS31	FBgn0039099	CG10157					FBgn0030005	CG2120			FBgn0035770	pst	FBgn0000036	nAcRalpha-96Aa	FBgn0032849	mRpS18B							FBgn0053936		FBgn0032445	CG6153			FBgn0037856	CG4674	FBgn0053202	dpr11					FBgn0034645	CG10320
FBgn0036004	Jarid2	FBgn0015789	Rab10	FBgn0260398	Pbp49	FBgn0032915	CG12050	FBgn0033539	Git	FBgn0024814	Clc	FBgn0039098	CG13822					FBgn0261862	whd			FBgn0013949	Ela	FBgn0036211	CG5946	FBgn0025700	CG5885							FBgn0034366	Atg7	FBgn0029783	Sirt4			FBgn0028993	scro	FBgn0052600	dpr8					FBgn0011206	bol
FBgn0030365	Tango4	FBgn0039626	Slu7	FBgn0031078	CG11943	FBgn0037882	CG17187	FBgn0050443	Opbp	FBgn0000061	al	FBgn0038149	CG9796					FBgn0034420	CG10737			FBgn0033391	CG8026	FBgn0003189	r	FBgn0260750	Mulk							FBgn0028689	Rpn6	FBgn0000319	Chc			FBgn0037466	CG1965	FBgn0260995	CG42596					FBgn0031208	CG11023
FBgn0260985	RfC4	FBgn0261793	Trf2	FBgn0035761	RhoGEF4	FBgn0021874	Nle	FBgn0024811	Crk	FBgn0027088	Aats-gly	FBgn0019925	Surf4					FBgn0260866	dnr1			FBgn0004575	Syn	FBgn0038319	mRpL9	FBgn0036824	CG3902							FBgn0033093	CG3270	FBgn0035425	CG17746			FBgn0054039	CG34039	FBgn0053481	dpr7					FBgn0034484	CG11044
FBgn0039869	CG1890	FBgn0039743	CG7946	FBgn0261930	vnd	FBgn0035021	CG4622	FBgn0016726	RpL29	FBgn0003676	T-cp1	FBgn0035423	CG17737					FBgn0050158	CG30158			FBgn0051216	Naam	FBgn0085395	Shawl	FBgn0052687	CG32687							FBgn0015282	Pros26.4	FBgn0032596	CG17331			FBgn0053993	CG33993	FBgn0040726	dpr					FBgn0034907	CG5539
FBgn0051989	Cap-D3	FBgn0024921	Trn	FBgn0035415	CG14966	FBgn0010194	Wnt5	FBgn0002780	mod	FBgn0041588	ligatin	FBgn0031245	CG3625					FBgn0032437	CR17024			FBgn0032205	CG4957	FBgn0003386	Shaw	FBgn0000566	Eip55E							FBgn0037537	CG2767	FBgn0051547	CG31547			FBgn0034251	CG11423	FBgn0260486	CG42533					FBgn0050177	CG30177
FBgn0024371	E2f2	FBgn0011571	caz	FBgn0026722	drosha	FBgn0000492	Dr	FBgn0028999	nerfin-1	FBgn0010391	Gtp-bp	FBgn0000179	bi					FBgn0030576	CG15890			FBgn0033194	Vps13	FBgn0034985	CG3328	FBgn0016693	Past1							FBgn0020513	ade5	FBgn0034439	CG10062			FBgn0031643	CG3008	FBgn0036732	Oatp74D					FBgn0039371	CG4960
FBgn0036272	CG4300	FBgn0036813	Aut1	FBgn0037255	Fip1	FBgn0037728	CG16817	FBgn0005648	Pabp2	FBgn0040623	Spase12	FBgn0261963	mid					FBgn0013342	n-syb			FBgn0035674	CG13295	FBgn0030352	CG15738	FBgn0052576	CG32576							FBgn0250791	Snap	FBgn0039969	Fis1			FBgn0259199	CG42303	FBgn0029807	CG3108					FBgn0030313	CG11697
FBgn0015828	TfIIEalpha	FBgn0027783	SMC2	FBgn0029629	CG8636	FBgn0011741	Actr13E	FBgn0040087	p115	FBgn0040918	schlank	FBgn0015609	CadN					FBgn0052635	Neto			FBgn0052196	CG32196	FBgn0040309	Jafrac1	FBgn0026261	bonsai							FBgn0003388	shd	FBgn0035165	CG13887			FBgn0037307	Tim17a2	FBgn0029804	CG3097					FBgn0038068	CG11600
FBgn0037236	Skp2	FBgn0027599	CG2790	FBgn0034734	CG4554	FBgn0031229	CG3436	FBgn0031977	baf	FBgn0023521	CG3587	FBgn0038247	Cad88C					FBgn0052564	CG32564			FBgn0259245	CG42343	FBgn0033294	Mal-A4	FBgn0036820	CG6852							FBgn0036318	Wbp2	FBgn0028687	Rpt1			FBgn0037310	Tim17b1	FBgn0001321	knk					FBgn0042207	CG18530
FBgn0038491	CG5292	FBgn0033155	Br140	FBgn0010173	RpA-70	FBgn0031421		FBgn0030406	CG1463	FBgn0013749	Arf102F	FBgn0039294	Cad96Cb					FBgn0030186	CG2962			FBgn0039617	CG14521	FBgn0002571	Mal-A3	FBgn0051821	CG31821							FBgn0039817	CG15553	FBgn0019886	Letm1			FBgn0030663	CG8117	FBgn0015589	Apc					FBgn0038067	CG11598
FBgn0058045	CG40045	FBgn0028926	NC2beta	FBgn0003261	Rm62	FBgn0033485	RpLP0-like	FBgn0015299	Ssb-c31a	FBgn0037688	CG9356	FBgn0032949	Lamp1					FBgn0051626	CG31626			FBgn0058378	CG40378	FBgn0010520	Bka	FBgn0052483	CG32483							FBgn0050344	CG30344	FBgn0037094	CG7611					FBgn0037857	Tengl4					FBgn0038069	CG11608
FBgn0030456	CG4332	FBgn0037550	CG9667	FBgn0011715	Snr1	FBgn0033845	mars	FBgn0002526	LanA	FBgn0024556	EfTuM	FBgn0038358	CG4525					FBgn0030541	CG11584			FBgn0051708	CG31708	FBgn0033557	CG12325	FBgn0030007	CG2263							FBgn0050345	CG30345	FBgn0011217	eff					FBgn0032811	CG10268					FBgn0033999	CG8093
FBgn0086711	mol	FBgn0035162	CG13900	FBgn0025571	SF1	FBgn0033474	CG1407	FBgn0261563	wb	FBgn0039163	CG5515	FBgn0052702	CG32702					FBgn0036836	CG11619			FBgn0031725	CG14010	FBgn0003965	v	FBgn0033524	Cyp49a1							FBgn0000173	ben	FBgn0032350	CG6287					FBgn0010240	Lcch3					FBgn0032266	CG18302
FBgn0022936	CycH	FBgn0260962	pic	FBgn0003559	su(f)	FBgn0034606	ASPP	FBgn0032701	CG10341	FBgn0021825	Dmn	FBgn0259140	CG42255					FBgn0038734	CG11453			FBgn0051646	CG31646	FBgn0031770	CG13995	FBgn0039175	CG5706							FBgn0032704	Jwa	FBgn0036571	CG12272					FBgn0042696	NfI					FBgn0032265	CG18301
FBgn0033846	mip120	FBgn0035194	Psf1	FBgn0031993	Piezo	FBgn0023081	gek	FBgn0032240	CG17768	FBgn0045866	bai	FBgn0035916	GAPsec					FBgn0040363	CG11384			FBgn0051814	CG31814	FBgn0034289	CG10910	FBgn0034588	CG9394							FBgn0034180	Ehbp1	FBgn0016917	Stat92E					FBgn0032522	CG16848					FBgn0032271	CG7329
FBgn0033491	CG18011	FBgn0052318	CG32318	FBgn0000578	ena	FBgn0037347	CG1427	FBgn0005585	Crc	FBgn0033429	CG12929	FBgn0028327	l(1)G0320					FBgn0038818	Nep4			FBgn0031627	CG15630	FBgn0038140	CG8784	FBgn0035039	CG3608							FBgn0051496	CG31496	FBgn0037443	CG1021					FBgn0031513	CG3347					FBgn0051872	CG31872
FBgn0036558		FBgn0011817	nmo	FBgn0037469	Dpck	FBgn0053182	Kdm4B	FBgn0015622	Cnx99A	FBgn0037816	CG6345	FBgn0033029	l(2)NC136					FBgn0039673	CG7568			FBgn0052683	CG32683	FBgn0037100	capaR	FBgn0031703	CG12512							FBgn0040660	CG13551	FBgn0260486	CG42533					FBgn0035179	CG12038					FBgn0043825	CG18284
FBgn0086898	dgo	FBgn0027086	Aats-ile	FBgn0010602	lwr	FBgn0026064	KP78a	FBgn0038524	sll	FBgn0085220	CG34191	FBgn0038808	Srp14					FBgn0023535	arg			FBgn0039883	RhoGAP100F	FBgn0038326	CG5044	FBgn0038731	CG11659							FBgn0044452	Atg2	FBgn0023174	Prosbeta2					FBgn0035398	Cht7					FBgn0032275	CG17097
FBgn0040079	pkaap	FBgn0034646	Rae1	FBgn0038390	Rbf2	FBgn0037978	KLHL18	FBgn0025629	CG4045	FBgn0038381	CG3303	FBgn0030796	CG4829					FBgn0030529	Clic			FBgn0036544	sff	FBgn0015288	RpL22	FBgn0038730	CG6300							FBgn0045064	bwa	FBgn0050277	Oatp58Da					FBgn0259247	laccase2					FBgn0034381	List
FBgn0015270	Orc2	FBgn0025457	Bub3	FBgn0025740	plexB	FBgn0035148	CG3402	FBgn0000459	disco	FBgn0015298	Srp19	FBgn0034184	CG9646					FBgn0261552	ps			FBgn0004514	Oct-TyrR	FBgn0027330	l(1)G0020	FBgn0035006	CG4563							FBgn0031566	CG2818	FBgn0036732	Oatp74D					FBgn0003353	sei					FBgn0031934	Ntl
FBgn0038118	timeout	FBgn0037087	CG7519	FBgn0025741	plexA	FBgn0010313	corto	FBgn0004915	TfIIB	FBgn0037199	CG11137	FBgn0034061	CG8386					FBgn0026721	fat-spondin			FBgn0037646	CAHbeta	FBgn0038098	CG7381	FBgn0030686	mRpL3							FBgn0027601	pdgy	FBgn0038535	alt					FBgn0037690	Task7					FBgn0032664	CG5755
FBgn0033088	CG3271	FBgn0015834	Trip1	FBgn0031631	CG3225	FBgn0261823	Asx	FBgn0039562	Gp93	FBgn0261509	haf	FBgn0035375	pgant6					FBgn0027356	Amph			FBgn0025592	Gyk	FBgn0037955	CG6950	FBgn0027094	Aats-ala							FBgn0030443	CG12715	FBgn0085426	Rgk3					FBgn0031821	CG9542					FBgn0033735	CG8525
FBgn0030969	CG7288	FBgn0036581	MED10	FBgn0033389	Rad51C	FBgn0000117	arm	FBgn0037809	CG12818	FBgn0028969	deltaCOP	FBgn0015793	Rab-RP3					FBgn0043364	cbt			FBgn0036759	CG5577	FBgn0030558	CG1461	FBgn0030786	mRpL22							FBgn0051717	CG31717	FBgn0053260	CG33260					FBgn0039043	CG17121					FBgn0011211	blw
FBgn0034271	CG4996	FBgn0050290	Ppcdc	FBgn0039306	CG11859	FBgn0031661	Gmd	FBgn0032822	CG10466	FBgn0086605	CG9853	FBgn0032225	CG5022					FBgn0034194	CG15611			FBgn0036760	CG5567	FBgn0032053	mRpL51	FBgn0031651	mRpL24							FBgn0035995	CG3529	FBgn0033543	CG12338					FBgn0260753	Pdfr					FBgn0010213	Sod2
FBgn0004795	retn	FBgn0005198	gig	FBgn0031868	Rat1	FBgn0026679	IntS4	FBgn0033379	Mys45A	FBgn0039757	RpS7	FBgn0052850	CG32850					FBgn0004619	Glu-RI			FBgn0063649	CG6006	FBgn0025286	RpL31	FBgn0011770	Gip							FBgn0034577	cpa	FBgn0032429	CG5446					FBgn0031992	CG8498					FBgn0031585	CG2955
FBgn0015553	tos	FBgn0260398	Pbp49	FBgn0031452	Cwc25	FBgn0035249	CG17249	FBgn0039233	CG7006	FBgn0002626	RpL32	FBgn0260799	p120ctn					FBgn0028431				FBgn0030005	CG2120	FBgn0038400	CG5903	FBgn0053303	CG33303							FBgn0036843	CG6812	FBgn0032078	C1GalTA					FBgn0031879	uif					FBgn0051907	CG31907
FBgn0259212	cno	FBgn0034814	CG9890	FBgn0016762	angel	FBgn0022349	CG1910	FBgn0013751	Awh	FBgn0035335	mRpL23	FBgn0020307	dve					FBgn0033495	CG12214			FBgn0050158	CG30158	FBgn0003257	r-l	FBgn0027786	Mtch							FBgn0038166	CG9588	FBgn0020385	pug					FBgn0032923	CG9248					FBgn0031757	Ucp4C
FBgn0038989	CG6937	FBgn0031078	CG11943	FBgn0039120	Nup98-96	FBgn0024191	sip1	FBgn0004607	zfh2	FBgn0038984	CG5315	FBgn0028879	CG15270					FBgn0050446	Tdc2			FBgn0032437	CR17024	FBgn0043005	prt	FBgn0033949	CG10131							FBgn0033717	CG8839	FBgn0029913	Cht11					FBgn0259245	CG42343					FBgn0030872	Ucp4A
FBgn0032051	CG13097	FBgn0036574	CG16838	FBgn0035854	CG8005	FBgn0040623	Spase12	FBgn0052743		FBgn0032020	CG7787	FBgn0013997	Nrx-IV					FBgn0259977	Tdc1			FBgn0015765	Mpk2	FBgn0035122	mRpL17	FBgn0030518	CG11134							FBgn0037293	CG12007	FBgn0035692	CG13298					FBgn0039617	CG14521					FBgn0035567	CG7514
FBgn0024236	foi	FBgn0261930	vnd	FBgn0026417	Hus1-like	FBgn0033688	Prp8	FBgn0052344	CG32344	FBgn0051800	CG31800	FBgn0022268	KdelR					FBgn0010423	TpnC47D			FBgn0036806	Cyp12c1	FBgn0028648	mRpL50	FBgn0010551	l(2)03709							FBgn0039223	CG5805	FBgn0041194	Prat2					FBgn0058378	CG40378					FBgn0035568	CG18418
FBgn0038609	Nup43	FBgn0026722	drosha	FBgn0030676	CG12379	FBgn0033562		FBgn0035520	CG11586	FBgn0034572	CG9346	FBgn0010638	Sec61beta					FBgn0010424	TpnC73F			FBgn0036449	bmm	FBgn0034986	mRpS17	FBgn0050291	CG30291							FBgn0036136	Ufd1-like	FBgn0028932	CG16890					FBgn0259714	CG42368					FBgn0032706	Irk3
FBgn0035489		FBgn0037255	Fip1	FBgn0026361	2013-09-05	FBgn0039137	CG13604	FBgn0001987	Gli	FBgn0030136	RpS28b	FBgn0051431	CG31431					FBgn0040342	CG3706			FBgn0051321	CG31321	FBgn0015324	Vha26	FBgn0259977	Tdc1							FBgn0035449	CG14971	FBgn0023175	Prosalpha7					FBgn0051814	CG31814					FBgn0037325	CG12147
FBgn0031252	CG13690	FBgn0029629	CG8636	FBgn0014029	2013-09-02	FBgn0036141	wls	FBgn0034654	CG10306	FBgn0031764	CG9107	FBgn0016013	Faa					FBgn0000711	flw			FBgn0038730	CG6300	FBgn0061356	CG18003	FBgn0032477	CG5287							FBgn0086785	Vps36	FBgn0036685	CG6664					FBgn0053543	CG33543					FBgn0037714	CG9396
FBgn0031895	CG4497	FBgn0003261	Rm62	FBgn0033859	CG6197	FBgn0010314	Cks30A	FBgn0036018	CG3335	FBgn0041191	Rheb	FBgn0028419	Kr-h2					FBgn0000667	Actn			FBgn0038734	CG11453	FBgn0086710	RpL30	FBgn0042101	CG18744							FBgn0051694	CG31694	FBgn0052243	CG32243					FBgn0039883	RhoGAP100F					FBgn0052832	CG32832
FBgn0025807	Rad9	FBgn0011715	Snr1	FBgn0033375	CG8078	FBgn0032050	CG13096	FBgn0027358	Tim9b	FBgn0036765	CG7408	FBgn0029003	mab-21					FBgn0035103	Vdup1			FBgn0035006	CG4563	FBgn0033816	CG4679	FBgn0029854	CG3566							FBgn0000422	Ddc	FBgn0036921	RhoGDI					FBgn0025625	Sik2					FBgn0013995	Calx
FBgn0028974	xmas-2	FBgn0025571	SF1	FBgn0031781	Arc-p20	FBgn0011336	OstStt3	FBgn0036510	CG7427	FBgn0031286	CG3862	FBgn0035827	Srp9					FBgn0037519	CG3014			FBgn0037996	CG4830	FBgn0032181	CG13133	FBgn0037892	mRpL40							FBgn0004910	Eip63F-1	FBgn0036309	Hip1					FBgn0023001	melt					FBgn0033323	CG12376
FBgn0035998	CG3437	FBgn0250911	CG42245	FBgn0025790	TBPH	FBgn0259173	corn	FBgn0029693	CG6379	FBgn0024996	eIF2B-beta	FBgn0025936	Eph					FBgn0262350				FBgn0034553	CG9993	FBgn0262018	CadN2	FBgn0030511	CG11158							FBgn0028690	Rpn5	FBgn0036740	CG6259					FBgn0039553	CG5017					FBgn0262579	Ect4
FBgn0011327	Uch-L3	FBgn0000578	ena	FBgn0038953	CG18596	FBgn0001235	hth	FBgn0037504	CG1142	FBgn0030669	CG9240	FBgn0034500	CG11200					FBgn0030510	CG12177			FBgn0034552	CG17999	FBgn0030096	Zpr1	FBgn0010516	wal							FBgn0000053	ade3	FBgn0262081	Csk					FBgn0259228	C3G					FBgn0051202	CG31202
FBgn0032363	CG6509	FBgn0010741	l(3)01239	FBgn0050342	Prp38	FBgn0037816	CG6345	FBgn0031904	CG5149	FBgn0026324	Taf10b	FBgn0086674	Tango13					FBgn0030992	CG33253			FBgn0040363	CG11384	FBgn0030482	CG1673	FBgn0030841	CG8568							FBgn0033544	CG7220	FBgn0029943	Atg5					FBgn0031681	pgant5					FBgn0039348	Npl4
FBgn0033994	CG7544	FBgn0250843	Pros35	FBgn0011666	msi	FBgn0032873	CG2614	FBgn0033557	CG12325	FBgn0024183	vig	FBgn0032361	CG6488					FBgn0020249	stck			FBgn0033665	CG13189	FBgn0025837	CG17636	FBgn0032286	CG7300							FBgn0004436	UbcD6	FBgn0036381	CG8745					FBgn0050463	CG30463					FBgn0037498	CG10029
FBgn0031043	CG14222	FBgn0010602	lwr	FBgn0004237	Hrb87F	FBgn0002932	neur	FBgn0002566	lt	FBgn0034753	CG2852	FBgn0038170	CG14367					FBgn0085391	CG34362			FBgn0032442	CG15485	FBgn0001098	Gdh	FBgn0038974	CG5377							FBgn0035632	Ppat-Dpck	FBgn0022774	Oat					FBgn0052487	CG32487					FBgn0028848	CG7311
FBgn0025864	Crag	FBgn0038390	Rbf2	FBgn0001215	Hrb98DE	FBgn0001075	ft	FBgn0037659	Kdm2	FBgn0064117	CG33714	FBgn0261642	mbl					FBgn0085383	CG34354			FBgn0022361	Pur-alpha	FBgn0004363	porin	FBgn0036334	CG11267							FBgn0029092	ced-6	FBgn0024958	Irp-1A					FBgn0259211	grh					FBgn0033190	CG2137
FBgn0035229	CG7852	FBgn0025741	plexA	FBgn0086897		FBgn0000497	ds	FBgn0040273	Spt5	FBgn0036774	mRpS26	FBgn0032192	CG5731					FBgn0052406	CG32406			FBgn0027356	Amph	FBgn0035064	CG16912	FBgn0038426	mRpS33							FBgn0032652	CG6870	FBgn0031992	CG8498					FBgn0036153	CG7573					FBgn0022160	Gpo-1
FBgn0002891	mus205	FBgn0031631	CG3225	FBgn0032793	CG10189	FBgn0261574	kug	FBgn0004646	ogre	FBgn0027950	MBD-like	FBgn0250788	beta-Spec					FBgn0030394	Cpr11A			FBgn0051774	fred	FBgn0013307	Odc1	FBgn0030480	Tim9a							FBgn0030993	Mec2	FBgn0043842	Yeti					FBgn0261458	capt					FBgn0039830	CG1746
FBgn0037093	Cdk12	FBgn0030719	eIF5	FBgn0039160	CG5510	FBgn0037372	CG2091	FBgn0027108	inx2	FBgn0037213	CG12581	FBgn0039411	dys					FBgn0029820	CG16721			FBgn0037239	CG11739	FBgn0013308	Odc2	FBgn0034390	CG15093							FBgn0004868	Gdi	FBgn0032005	Snx6					FBgn0033985	CG10257					FBgn0013771	Cyp6a9
FBgn0019949	Cdk9	FBgn0001320	kni	FBgn0033661	CG13185	FBgn0004859	ci	FBgn0028373	inx3	FBgn0261800	LanB1	FBgn0058196	Maf1					FBgn0034136	DAT			FBgn0034002	CG8079	FBgn0085261	CG34232	FBgn0086357	Sec61alpha							FBgn0054039	CG34039	FBgn0031534	Snx1					FBgn0052944	CG32944					FBgn0033304	Cyp6a13
FBgn0016696	Pitslre	FBgn0040337	CG3021	FBgn0026402	NiPp1	FBgn0086605	CG9853	FBgn0035993	Nf-YA	FBgn0066114	GlcAT-I	FBgn0032398	CG6766					FBgn0010414	SerT			FBgn0034194	CG15611	FBgn0003274	RpLP2	FBgn0262126	gho							FBgn0032000	CG8372	FBgn0026718	fu12					FBgn0016076	vri					FBgn0025454	Cyp6g1
FBgn0029714	CG3527	FBgn0028471	Nab2	FBgn0037899	RpL24-like	FBgn0050349	CG30349	FBgn0035524	CG11583	FBgn0041781	SCAR	FBgn0036147	Plod					FBgn0086693	iav			FBgn0030737	CG9914	FBgn0037842	CG6567	FBgn0000109	Aprt							FBgn0040005	CG17883	FBgn0005634	zip					FBgn0033753	Cyp301a1					FBgn0031182	Cyp6t1
FBgn0032120	CG33298	FBgn0031868	Rat1	FBgn0036000	CG3434	FBgn0034572	CG9346	FBgn0034013	unc-5	FBgn0259166	CG42271	FBgn0051915	CG31915					FBgn0028497	CG3530			FBgn0051221	CG31221	FBgn0002590	RpS5a									FBgn0028692	Rpn2	FBgn0052549	CG32549					FBgn0026189	prominin-like					FBgn0033696	Cyp6g2
FBgn0260859	Bet3	FBgn0028671	Vha100-1	FBgn0022224	ubl	FBgn0031764	CG9107	FBgn0005558	ey	FBgn0002579	RpL36	FBgn0036725	CG18265					FBgn0051140	CG31140			FBgn0004619	Glu-RI	FBgn0026409	Mpcp									FBgn0037009	CG5104	FBgn0052113	CG32113					FBgn0035399	CG14955					FBgn0015038	Cyp9b1
FBgn0050105	CG30105	FBgn0004924	Top1	FBgn0029133	REG	FBgn0260991	Incenp	FBgn0000625	eyg	FBgn0052409	CG32409	FBgn0036196	CG11658					FBgn0034789	PIP5K59B			FBgn0028431		FBgn0011787	mRpL12									FBgn0030183	CG15309	FBgn0034246	Dcr-2					FBgn0085452	CG34423					FBgn0030949	Cyp308a1
FBgn0030685	Graf	FBgn0031452	Cwc25	FBgn0038597	CG8064	FBgn0083992	Mkp	FBgn0033466	Pal1	FBgn0031736	CG11030	FBgn0032119	CG3769					FBgn0004244	Rdl			FBgn0035244	ABCB7	FBgn0034727	mRpS29									FBgn0000339	cni	FBgn0030300	Sk1					FBgn0052971	CG32971					FBgn0038236	Cyp313a1
FBgn0031118	RhoGAP19D	FBgn0040011	CG17494	FBgn0033400	CG2063	FBgn0026324	Taf10b	FBgn0053520		FBgn0037182	ArfGAP3	FBgn0016700	Rab1									FBgn0004516	Gad1	FBgn0033214	CG1941									FBgn0033886	CG13349	FBgn0030485	CG1998					FBgn0040397	CG3655					FBgn0033706	Vha36-2
FBgn0036850	Gem2	FBgn0051759	CG31759	FBgn0001150	gt	FBgn0028398	Taf10	FBgn0028402	Sin	FBgn0034232	CG4866	FBgn0037956	CG6959									FBgn0259977	Tdc1	FBgn0017579	RpL14									FBgn0039924	CG17471	FBgn0046247	CG5938					FBgn0039749	CG11498					FBgn0250814	CG4169
FBgn0034389	Mctp	FBgn0039120	Nup98-96	FBgn0259745	wech	FBgn0036896	wnd	FBgn0027330	l(1)G0020	FBgn0037270	CG9769	FBgn0033339	sec31									FBgn0032235	CG5096	FBgn0016013	Faa									FBgn0033373	CG8080	FBgn0033010	Atf6					FBgn0034364	CG5493					FBgn0040793	CG7630
FBgn0038421	CG17931	FBgn0015477	Rme-8	FBgn0010300	brat	FBgn0038275	CG3817	FBgn0008635	betaCop	FBgn0030327	FucT6	FBgn0051118	RabX4									FBgn0010423	TpnC47D	FBgn0040666	CG12848									FBgn0053198	pen-2	FBgn0033605	CG9067					FBgn0030529	Clic					FBgn0029084	gom
FBgn0039150	CG13605	FBgn0026361	2013-09-05	FBgn0086129	snama	FBgn0035464	CG12006	FBgn0039204	CG6607	FBgn0035947	Srp68	FBgn0000015	Abd-B									FBgn0032946	nrv3	FBgn0036213	RpL10Ab									FBgn0030703	MSBP	FBgn0035767	CG8596					FBgn0032593	trpgamma					FBgn0037329	CG12162
FBgn0014411	Vps26	FBgn0033859	CG6197	FBgn0028552	gammaSnap	FBgn0027889	ball	FBgn0031937	CG13795	FBgn0039116	CG10375	FBgn0085371	CG34342									FBgn0015776	nrv1	FBgn0030554	CG1434											FBgn0030357	Sclp					FBgn0051774	fred					FBgn0037987	CG14739
FBgn0032480	Edem2	FBgn0031781	Arc-p20	FBgn0030289	CG1597	FBgn0027504	CG8878	FBgn0000659	fkh	FBgn0008646	E5	FBgn0034145	CG5065									FBgn0000711	flw	FBgn0051450	mRpS18A											FBgn0000455	Dip-C					FBgn0032922	CG9249					FBgn0029679	CG2901
FBgn0034360	CG10927	FBgn0003008	or	FBgn0020255	ran	FBgn0027950	MBD-like	FBgn0004898	fd96Cb	FBgn0031544	CG17593	FBgn0034142	CG8306									FBgn0029761	SK	FBgn0040237	bor											FBgn0002716	mei-W68					FBgn0024179	wit					FBgn0039518	CG13978
FBgn0052451	SPoCk	FBgn0030699	CG8578	FBgn0034447	CG7744	FBgn0034282	Mapmodulin	FBgn0031040	CG14210	FBgn0015838	Vang	FBgn0001123	G-salpha60A									FBgn0004167	kst	FBgn0035756	unc-13-4A											FBgn0000261	Cat					FBgn0005536	Mbs					FBgn0039010	CG4907
FBgn0037958	CG6962	FBgn0050342	Prp38	FBgn0032408	CG6712	FBgn0037213	CG12581	FBgn0004463	RpIII128	FBgn0000320	eya	FBgn0036279	Ncc69									FBgn0040299	Myo28B1	FBgn0026196	nop5											FBgn0086377	Syx7					FBgn0039368	CG17196					FBgn0037915	CG6790
FBgn0041607	asparagine-synthetase	FBgn0004237	Hrb87F	FBgn0038473	ns1	FBgn0015625	CycB3	FBgn0015664	Dref	FBgn0010768	sqz	FBgn0034438	CG9416									FBgn0042104	CG18747	FBgn0042083	CG3267											FBgn0014010	Rab5					FBgn0039370	CG4956					FBgn0035707	CG8368
FBgn0035726	CG9953	FBgn0001215	Hrb98DE	FBgn0004636	R	FBgn0017577	Mcm5	FBgn0040235	c12.1	FBgn0036825	RpL26	FBgn0053653	Caps									FBgn0042102	CG18745	FBgn0033060	CG7849											FBgn0011672	Mvl					FBgn0035243	CG13926					FBgn0003074	Pgi
FBgn0024326	Mkk4	FBgn0086897		FBgn0031458	aph-1	FBgn0037802	Sirt6	FBgn0034087	clu	FBgn0022023	eIF-3p40	FBgn0039969	Fis1									FBgn0042103	CG18746	FBgn0001092	Gapdh2											FBgn0053936						FBgn0036499	CG7276					FBgn0029158	Las
FBgn0261524	lic	FBgn0039160	CG5510	FBgn0001202	hk	FBgn0015513	mbc	FBgn0032479	CG16974	FBgn0032138	CG4364	FBgn0029095	aru									FBgn0042105	CG18748	FBgn0030552	mRpL38											FBgn0034366	Atg7					FBgn0085437	CG34408					FBgn0039205	CG13623
FBgn0010269	Dsor1	FBgn0250746	Prosbeta7	FBgn0042712	HBS1	FBgn0052409	CG32409	FBgn0262582	cic	FBgn0004574	Rop	FBgn0030887	CG6867									FBgn0037517	CG10086	FBgn0260648	Rrp40											FBgn0028689	Rpn6					FBgn0034590	Magi					FBgn0050016	CG30016
FBgn0010303	hep	FBgn0035945	CG5026	FBgn0023509	mip130	FBgn0031736	CG11030	FBgn0039098	CG13822	FBgn0260939	Sgt1	FBgn0259923	2013-09-04									FBgn0042101	CG18744	FBgn0032729	CG10639											FBgn0015282	Pros26.4					FBgn0011596	fzo					FBgn0051116	ClC-a
FBgn0029723	Proc-R	FBgn0030336	CG1578	FBgn0036827	CG6843	FBgn0037182	ArfGAP3	FBgn0032517	CG7099	FBgn0033912	RpS23	FBgn0086448	Gpi1									FBgn0037853	CG14696	FBgn0035590	CG10673											FBgn0037537	CG2767					FBgn0004910	Eip63F-1					FBgn0036490	CG6888
FBgn0010621	Cct5	FBgn0046692	Stlk	FBgn0034967	eIF-5A	FBgn0030327	FucT6	FBgn0035423	CG17737	FBgn0037121	Rpb8	FBgn0010583	dock									FBgn0036575	CG5157	FBgn0038923	mRpL35											FBgn0085520	CG40801					FBgn0039127	CG13602					FBgn0039461	CG5500
FBgn0028919	CG16865	FBgn0036000	CG3434	FBgn0032671	CG7200	FBgn0039116	CG10375	FBgn0031245	CG3625	FBgn0024740	Lip2	FBgn0259178	5PtaseI									FBgn0040319	Gclc	FBgn0001219	Hsc70-4											FBgn0020513	ade5					FBgn0039809	CG15547					FBgn0034089	CG8446
FBgn0033844	bbc	FBgn0025641	DAAM	FBgn0038948	PSR	FBgn0011771	Hem	FBgn0261963	mid	FBgn0040007	RpL38	FBgn0028509	cenG1A									FBgn0020249	stck	FBgn0039094	CG10184											FBgn0250791	Snap					FBgn0029761	SK					FBgn0050360	Mal-A6
FBgn0032796	CG10188	FBgn0004509	Fur1	FBgn0035336	CG9004	FBgn0014861	Mcm2	FBgn0033376	CG8777	FBgn0029514	CG9166	FBgn0023441	fus									FBgn0259821	CG42402	FBgn0020910	RpL3											FBgn0050489	Cyp12d1-p					FBgn0034478	CG10822					FBgn0033297	Mal-A8
FBgn0010590	Prosbeta1	FBgn0031909	CG5181	FBgn0038499	Brf	FBgn0019947	Psn	FBgn0003892	ptc	FBgn0034059	CG8320	FBgn0031216	CG11376									FBgn0260229	CG42503	FBgn0010198	RpS15Aa											FBgn0033388	CG8046					FBgn0037972	CG10005					FBgn0033296	Mal-A7
FBgn0035953	CG5087	FBgn0029133	REG	FBgn0028500	Rich	FBgn0033187	CG2144	FBgn0031603	CG15432	FBgn0033539	Git	FBgn0037232	CG9791									FBgn0052406	CG32406	FBgn0027084	Aats-lys											FBgn0050344	CG30344					FBgn0037521	CG2993					FBgn0032382	Mal-B2
FBgn0261279	lqfR	FBgn0033400	CG2063	FBgn0004856	Bx42	FBgn0000576	ems	FBgn0034750	CG3732	FBgn0039291	CG13663	FBgn0032692	CG15161									FBgn0034136	DAT	FBgn0035538	DopEcR											FBgn0000173	ben					FBgn0034091	mrj					FBgn0032381	Mal-B1
FBgn0032938	CG8671	FBgn0001150	gt	FBgn0027525	CG7686	FBgn0053108	CG33108	FBgn0033029	l(2)NC136	FBgn0032292	CG6750	FBgn0015589	Apc									FBgn0010414	SerT	FBgn0030218	CG1628											FBgn0031897	CG13784					FBgn0037466	CG1965					FBgn0002570	Mal-A1
FBgn0024230	Hs2st	FBgn0259745	wech	FBgn0052372	ltl	FBgn0015838	Vang	FBgn0052069	CG32069	FBgn0011277	HLH4C	FBgn0032015	CG7830									FBgn0051140	CG31140	FBgn0039357	CG4743											FBgn0003660	Syb					FBgn0260657	CG42540					FBgn0002569	Mal-A2
FBgn0016792	dmt	FBgn0086129	snama	FBgn0023211	Elongin-C	FBgn0000320	eya	FBgn0035375	pgant6	FBgn0032597	CG17904	FBgn0004907	14-3-3zeta									FBgn0004244	Rdl	FBgn0050049	CG30049											FBgn0034180	Ehbp1					FBgn0259821	CG42402					FBgn0004919	gol
FBgn0026418	Hsc70Cb	FBgn0033526	Caf1-105	FBgn0040394	CG16903	FBgn0085409	CG34380	FBgn0259704	CG42358	FBgn0030572	mRpS25	FBgn0036169	Fuca									FBgn0039464	CG6330	FBgn0034441	CG10081											FBgn0040660	CG13551					FBgn0085383	CG34354					FBgn0032878	CG9316
FBgn0032296	CG6729	FBgn0020255	ran	FBgn0015615	Cap	FBgn0032082	CG18088	FBgn0260799	p120ctn	FBgn0016726	RpL29	FBgn0035771	sec63											FBgn0033720	CG13160											FBgn0044452	Atg2					FBgn0030841	CG8568					FBgn0030989	inx5
FBgn0002413	dco	FBgn0032408	CG6712	FBgn0040318	HGTX	FBgn0032138	CG4364	FBgn0052441	CG32441	FBgn0014417	CG13397	FBgn0041004	CG17715											FBgn0053012	CG33012											FBgn0045064	bwa					FBgn0037307	Tim17a2					FBgn0034837	RpL22-like
FBgn0004101	bs	FBgn0005322	nmd	FBgn0039566	CG4849	FBgn0261444	CG3638	FBgn0004132	boca	FBgn0028894	CG5869	FBgn0025186	ari-2											FBgn0034951	CG3860											FBgn0031566	CG2818					FBgn0030099	CG12056					FBgn0030558	CG1461
FBgn0033380	Phax	FBgn0004636	R	FBgn0051054	CR31054	FBgn0037121	Rpb8	FBgn0033260	Cul-4	FBgn0028999	nerfin-1	FBgn0028541	TM9SF4											FBgn0035610	Lkr											FBgn0024314	Plap					FBgn0034177	CG6796					FBgn0036763	CG7441
FBgn0020370	TppII	FBgn0031458	aph-1	FBgn0004584	Rrp1	FBgn0033378	tsu	FBgn0029992	Upf2	FBgn0005648	Pabp2	FBgn0032880	CG9318											FBgn0005533	RpS17											FBgn0051717	CG31717					FBgn0004244	Rdl					FBgn0034898	CG18128
FBgn0000996	dup	FBgn0086445	l(2)37Cd	FBgn0033556	CG12343	FBgn0086694	Bre1	FBgn0051431	CG31431	FBgn0040087	p115	FBgn0004606	zfh1											FBgn0031765	CG9109											FBgn0260935	ird1					FBgn0030663	CG8117					FBgn0039909	CG1970
FBgn0032208	CG5604	FBgn0001202	hk	FBgn0034307	CG10914	FBgn0011573	Cdc37	FBgn0033215	CG1942	FBgn0030406	CG1463	FBgn0261972												FBgn0038641	CG7708											FBgn0035995	CG3529					FBgn0031489	CG17224					FBgn0034824	Klp59C
FBgn0035703	CG8270	FBgn0042712	HBS1	FBgn0033899	CG13016	FBgn0015829	TfIIEbeta	FBgn0033216	CG1946	FBgn0032430	CG6388	FBgn0053554	Nipped-A											FBgn0053124	CG33124											FBgn0034577	cpa											FBgn0034827	Klp59D
FBgn0086372	lap	FBgn0023509	mip130	FBgn0260940	lsn	FBgn0032264	Lip4	FBgn0000611	exd	FBgn0002607	RpL19	FBgn0044510	mRpS5											FBgn0051668	CG31668											FBgn0038166	CG9588											FBgn0029964	CG1409
FBgn0034691	synj	FBgn0036827	CG6843	FBgn0032321	YL-1	FBgn0029514	CG9166	FBgn0017579	RpL14	FBgn0038805	TFAM	FBgn0027095	Manf											FBgn0037895	CG6723											FBgn0033717	CG8839											FBgn0037375	kat-60L1
FBgn0002441	l(3)mbt	FBgn0032671	CG7200	FBgn0031673	CG31650	FBgn0033539	Git	FBgn0035827	Srp9	FBgn0035603	CG10635	FBgn0004449	Ten-m											FBgn0039873	Smvt											FBgn0037293	CG12007											FBgn0038271	CG3731
FBgn0031310	CG4764	FBgn0038948	PSR	FBgn0017550	Rga	FBgn0014870	Psi	FBgn0032512	CG9305	FBgn0032240	CG17768	FBgn0039959	CG17514											FBgn0039872	salt											FBgn0039223	CG5805											FBgn0053296	CG33296
FBgn0262467	Scox	FBgn0035336	CG9004	FBgn0038471	CG5220	FBgn0050443	Opbp	FBgn0025936	Eph	FBgn0005585	Crc	FBgn0025373	Fpps											FBgn0017448	CG2187											FBgn0035679	CG10467											FBgn0031935	CG13793
FBgn0030801	Rcp	FBgn0027780	U26	FBgn0038737	CG11447	FBgn0030662	CG9220	FBgn0026196	nop5	FBgn0015622	Cnx99A	FBgn0036921	RhoGDI											FBgn0021875	Zfrp8											FBgn0031968	CG7231											FBgn0031936	CG13794
FBgn0053123	CG33123	FBgn0038499	Brf	FBgn0035347	CG33232	FBgn0038578	MED17	FBgn0032346	Csl4	FBgn0250820	CG5802	FBgn0261599	RpS29											FBgn0024997	CG2681											FBgn0024806	DIP2											FBgn0260479	CG31904
FBgn0035960	CG4942	FBgn0028693	Rpn12	FBgn0032915	CG12050	FBgn0036548		FBgn0038320	Sra-1	FBgn0038524	sll	FBgn0025684	MFS18											FBgn0035170	dpr20											FBgn0036136	Ufd1-like											FBgn0036204	Tim13
FBgn0027615	CG6404	FBgn0004856	Bx42	FBgn0037882	CG17187	FBgn0002905	mus308	FBgn0086674	Tango13	FBgn0025629	CG4045	FBgn0010747	Srp54k											FBgn0034286	dpr13											FBgn0035449	CG14971											FBgn0035999	CG3552
FBgn0037074	CG7324	FBgn0030996	CG14194	FBgn0021874	Nle	FBgn0034223	Tes	FBgn0051481	pb	FBgn0042650	disco-r	FBgn0036381	CG8745											FBgn0029974	dpr14											FBgn0086785	Vps36											FBgn0037860	CG6629
FBgn0038304	CG12241	FBgn0001565	Hlc	FBgn0035021	CG4622	FBgn0028894	CG5869	FBgn0015331	abs	FBgn0052174	CG32174	FBgn0001981	esg											FBgn0037993	dpr15											FBgn0028690	Rpn5											FBgn0037873	SdhC
FBgn0032723	ssp3	FBgn0261387	CG17528	FBgn0039164	CG5524	FBgn0028999	nerfin-1	FBgn0010220	Dbp45A	FBgn0040512	zetaCOP	FBgn0043842	Yeti											FBgn0053202	dpr11											FBgn0000053	ade3											FBgn0260755	CG42553
FBgn0032698	CG10336	FBgn0023514	CG14805	FBgn0011741	Actr13E	FBgn0036761	MED19	FBgn0032361	CG6488	FBgn0038976	CG7048	FBgn0034622	CG15666											FBgn0038282	dpr9											FBgn0033544	CG7220											FBgn0035329
FBgn0052590	CG32590	FBgn0023211	Elongin-C	FBgn0031229	CG3436	FBgn0005648	Pabp2	FBgn0260010	rump	FBgn0004915	TfIIB	FBgn0030421	CG3812											FBgn0037908	dpr5											FBgn0004436	UbcD6											FBgn0033382	Hydr1
FBgn0038853	RhoGAP93B	FBgn0036402	CG6650	FBgn0038890	CG7956	FBgn0040087	p115	FBgn0003449	snf	FBgn0004797	mdy	FBgn0011509	SrpRbeta											FBgn0053512	dpr4											FBgn0017572	Mo25											FBgn0052568	CG32568
FBgn0037652	CG11980	FBgn0040394	CG16903	FBgn0031421		FBgn0031070	CG12702	FBgn0001341	l(1)1Bi	FBgn0036856	CG9666	FBgn0259685	crb											FBgn0261871	dpr2											FBgn0011577												FBgn0069938	CG41106
FBgn0022213	Cas	FBgn0039566	CG4849	FBgn0037543	CG10903	FBgn0031977	baf	FBgn0029887	CG3198	FBgn0002622	RpS3	FBgn0052113	CG32113											FBgn0030720	CG8939											FBgn0037856	CG4674											FBgn0037172	CG6914
FBgn0036990	mRpL15	FBgn0051054	CR31054	FBgn0065035	AlkB	FBgn0030406	CG1463	FBgn0036745	CG7484	FBgn0037609	CG9773	FBgn0039928	cals											FBgn0033699	RpS11											FBgn0035625	Blimp-1											FBgn0036821	CG3961
FBgn0026056	Rlip	FBgn0000559	Ef2b	FBgn0033845	mars	FBgn0015299	Ssb-c31a	FBgn0037848	Tsp86D	FBgn0027085	Aats-leu	FBgn0036787	CG4306											FBgn0037232	CG9791											FBgn0028993	scro											FBgn0030605	CG5548
FBgn0029503	CHORD	FBgn0033556	CG12343	FBgn0039977	CG17454	FBgn0003124	polo	FBgn0040334	Tsp3A	FBgn0039562	Gp93	FBgn0025700	CG5885											FBgn0039627	CG11837											FBgn0030993	Mec2											FBgn0033883	CG16935
FBgn0030790	CG4768	FBgn0020224	Cbl	FBgn0036641	Smn	FBgn0026371	SAK	FBgn0031318	CG4887	FBgn0047135	CG32276	FBgn0033000	CG14464											FBgn0033690	EndoG											FBgn0004868	Gdi											FBgn0028342	l(1)G0230
FBgn0004698	mus210	FBgn0032321	YL-1	FBgn0010282	TfIIFalpha	FBgn0261563	wb	FBgn0086706	pix	FBgn0014023	Rlc1	FBgn0033010	Atf6											FBgn0005278	Sam-S											FBgn0040005	CG17883											FBgn0260005	wtrw
FBgn0001180	hb	FBgn0031673	CG31650	FBgn0035470	CG14980	FBgn0015296	Shc	FBgn0023527	CG3071	FBgn0037280	CG1126	FBgn0036544	sff											FBgn0051052												FBgn0028692	Rpn2											FBgn0261625	CG42708
FBgn0037202	Ssl1	FBgn0017550	Rga	FBgn0034606	ASPP	FBgn0032701	CG10341	FBgn0025678	CaBP1	FBgn0001105	Gbeta13F	FBgn0052576	CG32576											FBgn0086450	su(r)											FBgn0029820	CG16721											FBgn0036158	CG6149
FBgn0027053	CSN5	FBgn0038471	CG5220	FBgn0034921	Dcp1	FBgn0032240	CG17768	FBgn0034422	CG7137	FBgn0039233	CG7006	FBgn0262139	trh											FBgn0036173	CG7394											FBgn0033463	CG1513											FBgn0035817	CG7409
FBgn0085436	Not1	FBgn0000709	fliI	FBgn0026063	KP78b	FBgn0032706	Irk3	FBgn0036725	CG18265	FBgn0013751	Awh	FBgn0262115	CG17683											FBgn0037697	CG9363											FBgn0030183	CG15309											FBgn0035982	CG4461
FBgn0032042	CG13398	FBgn0260741	CG3281	FBgn0026064	KP78a	FBgn0005585	Crc	FBgn0037489	CG1234	FBgn0052105	CG32105	FBgn0037120	CG11247											FBgn0032031	CG13390											FBgn0000339	cni											FBgn0032520	CG10859
FBgn0031782	WDR79	FBgn0051453	pch2	FBgn0032059	PrBP	FBgn0015622	Cnx99A	FBgn0036916	Mtr3	FBgn0039580	Gfat2	FBgn0051690	CG31690											FBgn0260468	CG7950											FBgn0033886	CG13349											FBgn0029993	CG1571
FBgn0052373	CG32373	FBgn0035021	CG4622	FBgn0037978	KLHL18	FBgn0037301	Mms19	FBgn0015338	CG5861	FBgn0029147	NtR	FBgn0038324	CG5038											FBgn0039877	CG2118											FBgn0039924	CG17471											FBgn0035799	CG14838
FBgn0030850	CG8408	FBgn0031663	CG8891	FBgn0037490	CG10053	FBgn0039338	XNP	FBgn0033339	sec31	FBgn0030658	CG7872	FBgn0261403	sxc											FBgn0039536	CG18437											FBgn0033373	CG8080											FBgn0035100
FBgn0031287	CG4291	FBgn0024689	fws	FBgn0030522	CG11103	FBgn0000459	disco	FBgn0033555	RpS15Ab	FBgn0001987	Gli	FBgn0051823	CG31823											FBgn0028699	Rh50											FBgn0053198	pen-2											FBgn0034566	CG9313
FBgn0037081	barc	FBgn0011741	Actr13E	FBgn0051156	CG31156	FBgn0035872	CG7185	FBgn0010198	RpS15Aa	FBgn0034654	CG10306	FBgn0034025	GalNAc-T1											FBgn0061362	CG33785											FBgn0030703	MSBP											FBgn0020907	Scp2
FBgn0015789	Rab10	FBgn0039705	CG31033	FBgn0035148	CG3402	FBgn0036314	CG10754	FBgn0039868	CG11563	FBgn0038319	mRpL9	FBgn0035533	Cip4											FBgn0033454	CG1671											FBgn0039747	AdoR											FBgn0039112	CG10219
FBgn0039790	CG2246	FBgn0035082	CG2811	FBgn0038065	Snx3	FBgn0036856	CG9666	FBgn0037644	CG11964	FBgn0036510	CG7427	FBgn0262117	IntS3											FBgn0031077	CG15618											FBgn0033460	sec24											FBgn0039071	CG4434
FBgn0036397	CG8783	FBgn0032256	RluA-2	FBgn0039210	CG13625	FBgn0023518	trr	FBgn0086361	alph	FBgn0029693	CG6379	FBgn0004583	ex											FBgn0034915	eIF6																							FBgn0013809	Dhc16F
FBgn0035722	CG10075	FBgn0034528	CG11180	FBgn0010313	corto	FBgn0039562	Gp93	FBgn0010228	HmgZ	FBgn0259144	CG42259	FBgn0013718	nuf											FBgn0039404	CG14543																							FBgn0035581	CG17150
FBgn0004373	fwd	FBgn0065035	AlkB	FBgn0000117	arm	FBgn0023167	SmD3	FBgn0004362	HmgD	FBgn0037533	CD98hc	FBgn0026238	gus											FBgn0261535	l(2)34Fd																							FBgn0013811	Dhc62B
FBgn0002183	dre4	FBgn0033845	mars	FBgn0034277	CG6370	FBgn0003268	rod	FBgn0034243	ns2	FBgn0010520	Bka	FBgn0037537	CG2767											FBgn0052557	CG32557																							FBgn0013810	Dhc36C
FBgn0024921	Trn	FBgn0036641	Smn	FBgn0024947	NTPase	FBgn0030915	CG6179	FBgn0000015	Abd-B	FBgn0015773	NetA	FBgn0016076	vri											FBgn0032116	CG3759																							FBgn0028838	CSN1a
FBgn0027103	sec10	FBgn0034057	CG8314	FBgn0031661	Gmd	FBgn0034503	MED8	FBgn0086446	l(2)37Ce	FBgn0004646	ogre	FBgn0000229	bsk											FBgn0028662	VhaPPA1-1																							FBgn0030975	CG7349
FBgn0000032	Acph-1	FBgn0027453	Dnz1	FBgn0026679	IntS4	FBgn0032822	CG10466	FBgn0051638	CG31638	FBgn0027108	inx2	FBgn0026189	prominin-like											FBgn0039849	CG11334																							FBgn0014028	SdhB
FBgn0003139	PpV	FBgn0010282	TfIIFalpha	FBgn0051131	CG31131	FBgn0033379	Mys45A	FBgn0036188	CG7339	FBgn0035993	Nf-YA	FBgn0003278	RpI135											FBgn0030612	CG5599																							FBgn0031378	CG15362
FBgn0037843	CG4511	FBgn0034606	ASPP	FBgn0035249	CG17249	FBgn0013751	Awh	FBgn0020496	CtBP	FBgn0027564	CG3149	FBgn0027287	Gmap											FBgn0003517	sta																							FBgn0260453	CG17140
FBgn0033698	CG8858	FBgn0034921	Dcp1	FBgn0035627	Sse	FBgn0028554	x16	FBgn0004638	drk	FBgn0000625	eyg	FBgn0003425												FBgn0038799	CG4288																							FBgn0069354	Porin2
FBgn0020756		FBgn0038588	CG7156	FBgn0004368	Ptp4E	FBgn0052743		FBgn0011291	Taf11	FBgn0024542	Neos	FBgn0028968	gammaCop											FBgn0028274	ns3																							FBgn0038488	m-cup
FBgn0027599	CG2790	FBgn0033233	Kdm4A	FBgn0022349	CG1910	FBgn0003277	RpII215	FBgn0033571	Rpb5	FBgn0031814	retm	FBgn0030341	p24-1											FBgn0013949	Ela																							FBgn0034497	CG9090
FBgn0002948	nod	FBgn0026063	KP78b	FBgn0024191	sip1	FBgn0052344	CG32344	FBgn0015279	Pi3K92E	FBgn0261067	LSm1	FBgn0024189	sns											FBgn0038165	Task6																							FBgn0038280	CG14861
FBgn0033155	Br140	FBgn0026064	KP78a	FBgn0033688	Prp8	FBgn0032702	CG10376	FBgn0031256	CG4164	FBgn0028402	Sin	FBgn0000547	ed											FBgn0037186	CG11241																							FBgn0031066	CoVIb
FBgn0035106	rno	FBgn0032059	PrBP	FBgn0036141	wls	FBgn0035520	CG11586	FBgn0021875	Zfrp8	FBgn0032053	mRpL51	FBgn0003285	rst											FBgn0022774	Oat																							FBgn0261268	Cul-3
FBgn0030055	CG12772	FBgn0034962	MAN1	FBgn0029798	CG4078	FBgn0021995	Rs1	FBgn0037943	CG14722	FBgn0025286	RpL31	FBgn0028369	kirre											FBgn0011284	RpS4																							FBgn0032660	elfless
FBgn0033092	CG9422	FBgn0030522	CG11103	FBgn0037000	CG5130	FBgn0015271	Orc5	FBgn0039828	CG1542	FBgn0008635	betaCop	FBgn0261722	fwe											FBgn0031657	CG3756																							FBgn0027360	Tim10
FBgn0023536	CG3156	FBgn0038065	Snx3	FBgn0010314	Cks30A	FBgn0001987	Gli	FBgn0025366	Ip259	FBgn0039204	CG6607	FBgn0014949	btn											FBgn0024957	Irp-1B																							FBgn0026666	l(1)G0136
FBgn0260962	pic	FBgn0039210	CG13625	FBgn0015621	Clp	FBgn0015379	dod	FBgn0031216	CG11376	FBgn0083968	CG34132	FBgn0001319	kn											FBgn0036135	mRpL2																							FBgn0037637	CG9836
FBgn0035194	Psf1	FBgn0010313	corto	FBgn0032050	CG13096	FBgn0001324	kto	FBgn0030720	CG8939	FBgn0004898	fd96Cb	FBgn0004603	Src42A											FBgn0031308	CG4749																							FBgn0036145	CG7607
FBgn0052318	CG32318	FBgn0034277	CG6370	FBgn0011336	OstStt3	FBgn0034654	CG10306	FBgn0034716	Oatp58Dc	FBgn0031040	CG14210	FBgn0036291	CG10681											FBgn0032819	CG10463																							FBgn0033216	CG1946
FBgn0027086	Aats-ile	FBgn0024814	Clc	FBgn0033039	gp210	FBgn0036018	CG3335	FBgn0039627	CG11837	FBgn0029665	CG14270	FBgn0030351	CG1840											FBgn0032849	mRpS18B																							FBgn0033020	CG10396
FBgn0034646	Rae1	FBgn0024947	NTPase	FBgn0005410	sno	FBgn0032388	CG6686	FBgn0001257	ImpL2	FBgn0035122	mRpL17	FBgn0000439	Dfd											FBgn0259245	CG42343																							FBgn0032833	CoIV
FBgn0037087	CG7519	FBgn0051549	CG31549	FBgn0259173	corn	FBgn0031006	rictor	FBgn0031851	CG11188	FBgn0031829	osm-6	FBgn0037008	mTerf3											FBgn0039617	CG14521																							FBgn0038281	RpL10Aa
FBgn0020622	Pi3K21B	FBgn0051131	CG31131	FBgn0001235	hth	FBgn0029693	CG6379	FBgn0037611	CG11755	FBgn0024832		FBgn0261238	Alh											FBgn0051708	CG31708																							FBgn0052081	CG32081
FBgn0050290	Ppcdc	FBgn0035249	CG17249	FBgn0034214	CG6550	FBgn0031238	CG3645	FBgn0036169	Fuca	FBgn0040235	c12.1	FBgn0017545	RpS3A											FBgn0051646	CG31646																							FBgn0033572	CG12943
FBgn0005198	gig	FBgn0004368	Ptp4E	FBgn0034674	CG9304	FBgn0037504	CG1142	FBgn0034743	RpS16	FBgn0034087	clu	FBgn0015777	nrv2											FBgn0036824	CG3902																							FBgn0034121	CG6262
FBgn0039466	CG5521	FBgn0031284	CG3876	FBgn0002932	neur	FBgn0031904	CG5149	FBgn0036964	CG6480	FBgn0020389	Papss	FBgn0015776	nrv1											FBgn0052683	CG32683																							FBgn0061197	SIP2
FBgn0039528	dsd	FBgn0041588	ligatin	FBgn0261574	kug	FBgn0033557	CG12325	FBgn0025186	ari-2	FBgn0039099	CG10157	FBgn0261241	Vps16A											FBgn0052687	CG32687																							FBgn0021906	RFeSP
FBgn0260398	Pbp49	FBgn0033475	CG12129	FBgn0037372	CG2091	FBgn0015773	NetA	FBgn0022943	Cbp20	FBgn0039098	CG13822	FBgn0037708	CG9386											FBgn0039883	RhoGAP100F																							FBgn0035273	CG12020
FBgn0005695	gcl	FBgn0024191	sip1	FBgn0039115	CG10214	FBgn0037659	Kdm2	FBgn0028541	TM9SF4	FBgn0038149	CG9796	FBgn0032258	CG7456											FBgn0000566	Eip55E																							FBgn0052112	CG32112
FBgn0261984	Ire1	FBgn0037102	CG7172	FBgn0037199	CG11137	FBgn0040273	Spt5	FBgn0032880	CG9318	FBgn0086710	RpL30	FBgn0039014	CG6982											FBgn0000064	Ald																							FBgn0035231	Cct2
FBgn0034814	CG9890	FBgn0023521	CG3587	FBgn0004859	ci	FBgn0034657	LBR	FBgn0024887	kin17	FBgn0029594	CG14806	FBgn0041604	dlp											FBgn0004514	Oct-TyrR																							FBgn0261397	didum
FBgn0042641	frc	FBgn0035601	Uev1A	FBgn0027375	RecQ5	FBgn0004646	ogre	FBgn0004606	zfh1	FBgn0035423	CG17737	FBgn0250789	alpha-Spec											FBgn0003941	RpL40																							FBgn0031343	CG18131
FBgn0031078	CG11943	FBgn0038593	CG7146	FBgn0052075	CG32075	FBgn0027108	inx2	FBgn0010770	ppan	FBgn0031245	CG3625	FBgn0002973	numb											FBgn0051821	CG31821																							FBgn0001091	Gapdh1
FBgn0041210	HDAC4	FBgn0013749	Arf102F	FBgn0005696	DNApol-alpha73	FBgn0028373	inx3	FBgn0032078	C1GalTA	FBgn0000179	bi	FBgn0262350												FBgn0052483	CG32483																							FBgn0034173	CG9010
FBgn0036574	CG16838	FBgn0037688	CG9356	FBgn0260987	vtd	FBgn0035524	CG11583	FBgn0033458	CG18446	FBgn0261963	mid	FBgn0262475	bru-2											FBgn0025592	Gyk																							FBgn0050060	CG30060
FBgn0000826	png	FBgn0036141	wls	FBgn0051800	CG31800	FBgn0027564	CG3149	FBgn0004556	Dbp73D	FBgn0039294	Cad96Cb	FBgn0038755	Hs6st											FBgn0063649	CG6006																							FBgn0034687	CG11475
FBgn0029999	CG1575	FBgn0039163	CG5515	FBgn0034572	CG9346	FBgn0034013	unc-5	FBgn0004901	Prat	FBgn0030096	Zpr1	FBgn0028993	scro											FBgn0037140	CG7442																							FBgn0028892	CG4161
FBgn0039417	CG6073	FBgn0035121	Tudor-SN	FBgn0031764	CG9107	FBgn0086902	kis	FBgn0034975	enok	FBgn0032949	Lamp1	FBgn0032524	CG9267											FBgn0026079	Nsun2																							FBgn0034689	CG2921
FBgn0038951	CG5380	FBgn0015621	Clp	FBgn0260991	Incenp	FBgn0005558	ey	FBgn0027095	Manf	FBgn0031603	CG15432	FBgn0004873												FBgn0011272	RpL13																							FBgn0034419	CG15111
FBgn0026722	drosha	FBgn0021825	Dmn	FBgn0083992	Mkp	FBgn0000625	eyg	FBgn0033454	CG1671	FBgn0085224	CG34195	FBgn0031227	CG3709											FBgn0037926	Elp1																							FBgn0035491	Dpy-30L2
FBgn0025681	CG3558	FBgn0032050	CG13096	FBgn0034086	CG8441	FBgn0051357	CG31357	FBgn0031077	CG15618	FBgn0038358	CG4525	FBgn0064225	RpL5											FBgn0261597	RpS26																							FBgn0016919	nompB
FBgn0010173	RpA-70	FBgn0028664	VhaM9.7-c	FBgn0025781	cdc16	FBgn0033466	Pal1	FBgn0033902	Tango7	FBgn0035916	GAPsec	FBgn0036621	roq											FBgn0019938	RpI1																							FBgn0034247	CG6484
FBgn0037549	CG7878	FBgn0033039	gp210	FBgn0029113	Uba2	FBgn0037220	CG14641	FBgn0032404	RpL7-like	FBgn0035256	CG13930	FBgn0053993	CG33993											FBgn0010265	RpS13																							FBgn0036162	CG6140
FBgn0029979	CG10777	FBgn0259173	corn	FBgn0030669	CG9240	FBgn0031836	CG11050	FBgn0038235	CG8461	FBgn0028327	l(1)G0320	FBgn0035656	CG10479											FBgn0038146	CG9799																							FBgn0051874	CG31874
FBgn0031194	CG17598	FBgn0030366	Usp7	FBgn0026324	Taf10b	FBgn0039680	CAP-D2	FBgn0029785	RpL35	FBgn0033987	ckn	FBgn0040005	CG17883											FBgn0013342	n-syb																							FBgn0029890	CG4095
FBgn0260862	Vti1	FBgn0030049	Trf4-1	FBgn0028398	Taf10	FBgn0039215	CG6695	FBgn0034138	RpS15	FBgn0038808	Srp14	FBgn0037009	CG5104											FBgn0003278	RpI135																							FBgn0037276	CG17387
FBgn0036133	CG7638	FBgn0035980	CG4447	FBgn0036896	wnd	FBgn0053520		FBgn0001981	esg	FBgn0030796	CG4829	FBgn0024184	unc-4											FBgn0052564	CG32564																							FBgn0001216	Hsc70-1
FBgn0052412	QC	FBgn0002932	neur	FBgn0027080	Aats-tyr	FBgn0037622	CG8202	FBgn0001983	wor	FBgn0034061	CG8386	FBgn0010704	l(2)s5379											FBgn0030966	CG7280																							FBgn0031273	CG2839
FBgn0250843	Pros35	FBgn0016041	Tom40	FBgn0033352	CG8232	FBgn0035271	CG2021	FBgn0035144	CG17181	FBgn0052069	CG32069	FBgn0030600	hiw											FBgn0039175	CG5706																							FBgn0029783	Sirt4
FBgn0004465	Su(P)	FBgn0037372	CG2091	FBgn0038275	CG3817	FBgn0028402	Sin	FBgn0031657	CG3756	FBgn0030930	GalNAc-T2	FBgn0067318												FBgn0027334	l(1)G0004																							FBgn0004507	GlyP
FBgn0015799	Rbf	FBgn0039115	CG10214	FBgn0032725	Nedd8	FBgn0010355	Taf1	FBgn0033741	CG8545	FBgn0035375	pgant6	FBgn0039734	Tace											FBgn0031703	CG12512																							FBgn0038662	CG14290
FBgn0038390	Rbf2	FBgn0037199	CG11137	FBgn0035464	CG12006	FBgn0027330	l(1)G0020	FBgn0011509	SrpRbeta	FBgn0032225	CG5022	FBgn0030480	Tim9a											FBgn0035006	CG4563																							FBgn0035143	Ppm1
FBgn0038723	CG6195	FBgn0052075	CG32075	FBgn0033089	CG17266	FBgn0024330	MED6	FBgn0039359	RpL27	FBgn0053051	CG33051	FBgn0086357	Sec61alpha											FBgn0037996	CG4830																							FBgn0039421	CG6036
FBgn0034585	CG4030	FBgn0034572	CG9346	FBgn0035027	CG3511	FBgn0008635	betaCop	FBgn0040373	CG3038	FBgn0259704	CG42358	FBgn0262126	gho											FBgn0034553	CG9993																							FBgn0032219	CG4995
FBgn0050010	CG30010	FBgn0031764	CG9107	FBgn0027617	CG5808	FBgn0039204	CG6607	FBgn0259685	crb	FBgn0037718	P58IPK	FBgn0034177	CG6796											FBgn0030686	mRpL3																							FBgn0038979	CG7046
FBgn0053635	CG33635	FBgn0260991	Incenp	FBgn0044826	Pak3	FBgn0037661	Ada	FBgn0032847	Taf13	FBgn0260799	p120ctn	FBgn0250785	vari											FBgn0032442	CG15485																							FBgn0038449	CG17562
FBgn0040337	CG3021	FBgn0031044	MKP-4	FBgn0027889	ball	FBgn0000659	fkh	FBgn0039136	CG5902	FBgn0052441	CG32441													FBgn0029843	Nep1																							FBgn0032055	CG13091
FBgn0039846	CG11337	FBgn0034086	CG8441	FBgn0027504	CG8878	FBgn0004898	fd96Cb	FBgn0011763	Dp	FBgn0004132	boca													FBgn0031020	Nat1																							FBgn0038033	CG10097
FBgn0012066		FBgn0025781	cdc16	FBgn0000139	ash2	FBgn0011655	Med	FBgn0036500	CG7275	FBgn0003274	RpLP2													FBgn0030786	mRpL22																							FBgn0038032	CG10096
FBgn0028471	Nab2	FBgn0029113	Uba2	FBgn0034282	Mapmodulin	FBgn0031040	CG14210	FBgn0052791	CG32791	FBgn0022268	KdelR													FBgn0031651	mRpL24																							FBgn0031443	Prosbeta4R2
FBgn0031537	sec5	FBgn0036570	IntS9	FBgn0037213	CG12581	FBgn0260659	CG42542	FBgn0011241	cbx	FBgn0261593	RpS10b													FBgn0023535	arg																							FBgn0262573
FBgn0004924	Top1	FBgn0030669	CG9240	FBgn0015625	CycB3	FBgn0026702	l(1)G0045	FBgn0037874	Tctp	FBgn0027496	epsilonCOP													FBgn0011770	Gip																							FBgn0010217	ATPsyn-beta
FBgn0031452	Cwc25	FBgn0026324	Taf10b	FBgn0020245	ttv	FBgn0051301	CG31301	FBgn0000617	e(y)1	FBgn0034982	CG4065													FBgn0037239	CG11739																							FBgn0033086	CG9410
FBgn0040011	CG17494	FBgn0028398	Taf10	FBgn0017577	Mcm5	FBgn0004463	RpIII128	FBgn0033000	CG14464	FBgn0010638	Sec61beta													FBgn0010412	RpS19a																							FBgn0017456	Ubc84D
FBgn0024362	CG11412	FBgn0031996	CG8460	FBgn0029833	CG5941	FBgn0015014		FBgn0259784		FBgn0051431	CG31431													FBgn0030518	CG11134																							FBgn0001989	l(2)35Di
FBgn0051759	CG31759	FBgn0027080	Aats-tyr	FBgn0032997	CG17486	FBgn0028931	CG16863	FBgn0030245	CG1637	FBgn0261353	CG42630													FBgn0051221	CG31221																							FBgn0036440	CG17177
FBgn0039120	Nup98-96	FBgn0033352	CG8232	FBgn0051715	CG31715	FBgn0015664	Dref	FBgn0262139	trh	FBgn0000611	exd													FBgn0086904	Nacalpha																							FBgn0033322	CG8584
FBgn0015477	Rme-8	FBgn0038275	CG3817	FBgn0024291	Sir2	FBgn0040235	c12.1	FBgn0035767	CG8596	FBgn0017579	RpL14													FBgn0004619	Glu-RI																							FBgn0034327	CG14505
FBgn0030699	CG8578	FBgn0038428	CG14894	FBgn0015513	mbc	FBgn0032479	CG16974	FBgn0262115	CG17683	FBgn0028419	Kr-h2													FBgn0028431																								FBgn0031998	CG8451
FBgn0038953	CG18596	FBgn0032725	Nedd8	FBgn0038134	wntD	FBgn0028683	spt4	FBgn0260946	exo84	FBgn0029003	mab-21													FBgn0010551	l(2)03709																							FBgn0032474	DnaJ-H
FBgn0011666	msi	FBgn0035464	CG12006	FBgn0036514	CG12301	FBgn0031540	CG3238	FBgn0037120	CG11247	FBgn0035827	Srp9													FBgn0031282	Pex12																							FBgn0011754	PhKgamma
FBgn0004903	Rb97D	FBgn0000721	for	FBgn0052409	CG32409	FBgn0032517	CG7099	FBgn0038324	CG5038	FBgn0036213	RpL10Ab													FBgn0027945	ppl																							FBgn0259794	sinah
FBgn0015019	Cctgamma	FBgn0026582	CG9418	FBgn0037182	ArfGAP3	FBgn0037297	CG1116	FBgn0036258	CG5642	FBgn0034500	CG11200													FBgn0037815	Rrp46																							FBgn0051361	dpr17
FBgn0085275		FBgn0035027	CG3511	FBgn0034232	CG4866	FBgn0261963	mid	FBgn0086532	Spt-I	FBgn0032346	Csl4													FBgn0035244	ABCB7																							FBgn0053516	dpr3
FBgn0051782		FBgn0027617	CG5808	FBgn0039116	CG10375	FBgn0034380	CG15087	FBgn0000163	baz	FBgn0038320	Sra-1													FBgn0004516	Gad1																							FBgn0029812	Prosbeta2R1
FBgn0040752	Prosap	FBgn0014001	Pak	FBgn0011771	Hem	FBgn0033376	CG8777	FBgn0024491	Bin1	FBgn0086674	Tango13													FBgn0259977	Tdc1																							FBgn0034715	Oatp58Db
FBgn0026402	NiPp1	FBgn0025743	mbt	FBgn0010356	Taf5	FBgn0003892	ptc	FBgn0026079	Nsun2	FBgn0032361	CG6488													FBgn0010423	TpnC47D																							FBgn0035217	FucTD
FBgn0030026	sni	FBgn0044826	Pak3	FBgn0014861	Mcm2	FBgn0031603	CG15432	FBgn0259211	grh	FBgn0038170	CG14367													FBgn0029761	SK																							FBgn0261561	CG42675
FBgn0250746	Prosbeta7	FBgn0038462	CG17556	FBgn0019947	Psn	FBgn0083940	CG34104	FBgn0004583	ex	FBgn0039555	mRpS22													FBgn0086472	RpS25																							FBgn0051679	Tengl3
FBgn0035945	CG5026	FBgn0038461	CG3678	FBgn0032234	gny	FBgn0038855	CG5745	FBgn0037926	Elp1	FBgn0250788	beta-Spec													FBgn0029854	CG3566																							FBgn0051682	Tengl1
FBgn0030336	CG1578	FBgn0027889	ball	FBgn0000576	ems	FBgn0261872	scaf6	FBgn0039218	Rpb10	FBgn0037279	CG1129													FBgn0037561	CG9630																							FBgn0037857	Tengl4
FBgn0046692	Stlk	FBgn0027504	CG8878	FBgn0053108	CG33108	FBgn0034750	CG3732	FBgn0030873	CG15814	FBgn0034035	CG8207													FBgn0037892	mRpL40																							FBgn0052463	Tengl2
FBgn0023083	fray	FBgn0000139	ash2	FBgn0000320	eya	FBgn0033029	l(2)NC136	FBgn0037382	Hpr1	FBgn0051915	CG31915													FBgn0030511	CG11158																							FBgn0031359	CG18317
FBgn0031321	Tgt	FBgn0027950	MBD-like	FBgn0022023	eIF-3p40	FBgn0030361	CG1492	FBgn0030474	CG15747	FBgn0036745	CG7484													FBgn0259821	CG42402																							FBgn0085390	Dgk
FBgn0025641	DAAM	FBgn0034282	Mapmodulin	FBgn0028411	Nxt1	FBgn0035987	CG3689	FBgn0039274	CG11920	FBgn0037848	Tsp86D													FBgn0029148	NHP2																							FBgn0023540	CG3630
FBgn0030638	CG11655	FBgn0036959	CG6951	FBgn0051713	Apf	FBgn0035375	pgant6	FBgn0261020	wol	FBgn0040334	Tsp3A													FBgn0260229	CG42503																							FBgn0035384	CG2113
FBgn0086683	Spf45	FBgn0029134	Prosbeta5	FBgn0035888	CG7120	FBgn0027868	Nup107	FBgn0020412	JIL-1	FBgn0086706	pix													FBgn0030394	Cpr11A																							FBgn0034816	CG3085
FBgn0004598	Fur2	FBgn0015625	CycB3	FBgn0027603	Ulp1	FBgn0010379	Akt1	FBgn0051390	MED7	FBgn0023527	CG3071													FBgn0036460	CG5114																							FBgn0028902	Tektin-A
FBgn0032191	CG5734	FBgn0020245	ttv	FBgn0032138	CG4364	FBgn0259704	CG42358	FBgn0019938	RpI1	FBgn0025678	CaBP1													FBgn0010339	128up																							FBgn0035638	Tektin-C
FBgn0033050	Pngl	FBgn0066114	GlcAT-I	FBgn0261444	CG3638	FBgn0261790	SmE	FBgn0032509	CG6523	FBgn0039269	veli													FBgn0010414	SerT																							FBgn0034618	CG9485
FBgn0032781	CG9987	FBgn0029833	CG5941	FBgn0050394	CG30394	FBgn0011640	lark	FBgn0038927	CG6015	FBgn0027784	Prp18													FBgn0036334	CG11267																							FBgn0031860	CG11236
FBgn0026206	mei-P26	FBgn0004404	RpS14b	FBgn0003346	RanGap	FBgn0052441	CG32441	FBgn0032153	CG4537	FBgn0034422	CG7137													FBgn0038858	CG5793																							FBgn0033274	CG14757
FBgn0010300	brat	FBgn0038504	Sur-8	FBgn0027841	CstF-64	FBgn0014879	Set	FBgn0000229	bsk	FBgn0036725	CG18265													FBgn0034488	CG11208																							FBgn0052727	CG32727
FBgn0086129	snama	FBgn0261850	Xpd	FBgn0033378	tsu	FBgn0033260	Cul-4	FBgn0050390	Sgf29	FBgn0032119	CG3769													FBgn0032518	RpL24																							FBgn0054057	CG34057
FBgn0036819	dysb	FBgn0052190	NUCB1	FBgn0086694	Bre1	FBgn0052104	CG32104	FBgn0003278	RpI135	FBgn0016700	Rab1													FBgn0051140	CG31140																							FBgn0031472	CG2983
FBgn0030289	CG1597	FBgn0036514	CG12301	FBgn0015829	TfIIEbeta	FBgn0051431	CG31431	FBgn0028789	Doc1	FBgn0037956	CG6959													FBgn0034390	CG15093																							FBgn0036262	CG6910
FBgn0020369	Pros45	FBgn0000556	Ef1alpha48D	FBgn0042207	CG18530	FBgn0001986	l(2)35Df	FBgn0035956	Doc2	FBgn0036916	Mtr3													FBgn0004244	Rdl																							FBgn0035890	CG13667
FBgn0040964	CG18661	FBgn0052409	CG32409	FBgn0029514	CG9166	FBgn0033215	CG1942	FBgn0003425		FBgn0015338	CG5861													FBgn0039464	CG6330																							FBgn0031912	CG5261
FBgn0010803	Aats-trp	FBgn0031736	CG11030	FBgn0015610		FBgn0000611	exd	FBgn0050476	ave	FBgn0035590	CG10673																																					FBgn0038397	CG10185
FBgn0033526	Caf1-105	FBgn0037182	ArfGAP3	FBgn0027660	blot	FBgn0000412	D1	FBgn0033059	CG7845	FBgn0033339	sec31																																					FBgn0016691	Oscp
FBgn0032746	CG10470	FBgn0037270	CG9769	FBgn0039625	beta4GalNAcTB	FBgn0032512	CG9305	FBgn0015907	bl	FBgn0051118	RabX4																																					FBgn0039689	CG7598
FBgn0020255	ran	FBgn0028837	CSN6	FBgn0039726	eIF2B-alpha	FBgn0032036	CG13384	FBgn0024189	sns	FBgn0033555	RpS15Ab																																					FBgn0032424	CG17010
FBgn0034535	CG11110	FBgn0026192	par-6	FBgn0030230	Rph	FBgn0261004	asl	FBgn0029082	hbs	FBgn0010198	RpS15Aa																																					FBgn0038626	CG7691
FBgn0034447	CG7744	FBgn0039116	CG10375	FBgn0033539	Git	FBgn0037151	CG7130	FBgn0000547	ed	FBgn0037686	RpL34b																																					FBgn0031155	CG15446
FBgn0005322	nmd	FBgn0034791	CG3501	FBgn0014870	Psi	FBgn0026196	nop5	FBgn0003285	rst	FBgn0085371	CG34342																																					FBgn0031261	nAcRbeta-21C
FBgn0030305	CG1749	FBgn0010356	Taf5	FBgn0025463	Bap60	FBgn0032346	Csl4	FBgn0030711	Rrp47	FBgn0039357	CG4743																																					FBgn0031729	CG12511
FBgn0035016	CG4612	FBgn0027549	CG7927	FBgn0032597	CG17904	FBgn0030364	CG15735	FBgn0000115	Arf72A	FBgn0036279	Ncc69																																					FBgn0051244	CG31244
FBgn0023520	CG3857	FBgn0019947	Psn	FBgn0259743		FBgn0038320	Sra-1	FBgn0031054	Ssu72	FBgn0034438	CG9416																																					FBgn0040705	CG15434
FBgn0030512	CG9940	FBgn0086134	Pros25	FBgn0038578	MED17	FBgn0036811	MED11	FBgn0260456	CG4806	FBgn0029095	aru																																					FBgn0035204	CG2277
FBgn0086445	l(2)37Cd	FBgn0032234	gny	FBgn0036548		FBgn0025776	ind	FBgn0003169	put	FBgn0086446	l(2)37Ce																																					FBgn0029868	CG3446
FBgn0033272	RagC	FBgn0033166	Eaf	FBgn0002905	mus308	FBgn0051481	pb	FBgn0004603	Src42A	FBgn0036194	CG11652																																					FBgn0040391	CG2854
FBgn0020443	Elf	FBgn0053108	CG33108	FBgn0002780	mod	FBgn0015331	abs	FBgn0039557	CG12259	FBgn0035951	CG5068																																					FBgn0050398	CG30398
FBgn0015544	spag	FBgn0039240	CG3744	FBgn0011290	Taf12	FBgn0010220	Dbp45A	FBgn0032688	CG15160	FBgn0259923	2013-09-04																																					FBgn0051787	CG31787
FBgn0024352	Hop	FBgn0031233	CG11490	FBgn0028894	CG5869	FBgn0032361	CG6488	FBgn0004595	pros	FBgn0036188	CG7339																																					FBgn0034483	CG16894
FBgn0036827	CG6843	FBgn0020270	mre11	FBgn0259113	DNApol-alpha180	FBgn0260010	rump	FBgn0039732	CG15525	FBgn0040751	CG13018																																					FBgn0000121	Arr2
FBgn0261068	LSm7	FBgn0032752	CG10702	FBgn0019637	Atu	FBgn0031947	CG7154	FBgn0038057	CG12267	FBgn0011291	Taf11																																					FBgn0036454	CG17839
FBgn0004875	enc	FBgn0028411	Nxt1	FBgn0037377	CG1218	FBgn0011225	jar	FBgn0000439	Dfd	FBgn0044511	mRpS21																																					FBgn0039425	CG5432
FBgn0035336	CG9004	FBgn0051713	Apf	FBgn0040087	p115	FBgn0025638	Roc1a	FBgn0261238	Alh	FBgn0010408	RpS9																																					FBgn0000064	Ald
FBgn0027780	U26	FBgn0027603	Ulp1	FBgn0031070	CG12702	FBgn0025140	pit	FBgn0017545	RpS3A	FBgn0005533	RpS17																																					FBgn0038630	CG14305
FBgn0038499	Brf	FBgn0050394	CG30394	FBgn0037878	CG6693	FBgn0003449	snf	FBgn0260749	Utx	FBgn0014026	RpL7A																																					FBgn0087012	5-HT2
FBgn0028693	Rpn12	FBgn0045073	Stim	FBgn0031977	baf	FBgn0036915	CG7757	FBgn0024196	robl	FBgn0039172	Spase22-23																																					FBgn0039737	CG7920
FBgn0039876	CG2126	FBgn0029915	CG14434	FBgn0030406	CG1463	FBgn0001341	l(1)1Bi	FBgn0030109	CG12121	FBgn0015277	Pi3K59F																																					FBgn0040345	CG3708
FBgn0028500	Rich	FBgn0003346	RanGap	FBgn0004391	shtd	FBgn0036734	CG7564	FBgn0037708	CG9386	FBgn0031256	CG4164																																					FBgn0039553	CG5017
FBgn0030996	CG14194	FBgn0027841	CstF-64	FBgn0003124	polo	FBgn0029887	CG3198	FBgn0032258	CG7456	FBgn0025366	Ip259																																					FBgn0037994	CG4810
FBgn0033179	p47	FBgn0033378	tsu	FBgn0026371	SAK	FBgn0036973	Rbbp5	FBgn0039014	CG6982	FBgn0028509	cenG1A																																					FBgn0034658	Grx-1
FBgn0029958	Pdp	FBgn0086694	Bre1	FBgn0015296	Shc	FBgn0040334	Tsp3A	FBgn0041604	dlp	FBgn0026373	RpII33																																					FBgn0037891	CG5214
FBgn0021847	l(2)k14710	FBgn0015829	TfIIEbeta	FBgn0032701	CG10341	FBgn0023177	Pp4-19C	FBgn0037561	CG9630	FBgn0033699	RpS11																																					FBgn0032061	CG9314
FBgn0014467	CrebB-17A	FBgn0030838	CG5445	FBgn0042085	Bap170	FBgn0004177	mts	FBgn0037573	eIF4AIII	FBgn0032692	CG15161																																					FBgn0001263	inaD
FBgn0002878	mus101	FBgn0036292	CG10646	FBgn0036640	nxf2	FBgn0031318	CG4887	FBgn0001942	eIF-4a	FBgn0031851	CG11188																																					FBgn0052488	CG32488
FBgn0033635	CG7777	FBgn0015610		FBgn0003321	sbr	FBgn0025678	CaBP1	FBgn0030793	CG9125	FBgn0037611	CG11755																																					FBgn0034713	CG11291
FBgn0052732	CG32732	FBgn0261647	Axud1	FBgn0037301	Mms19	FBgn0027784	Prp18	FBgn0038323	CG6196	FBgn0036169	Fuca																																					FBgn0052487	CG32487
FBgn0023514	CG14805	FBgn0010905	Spn	FBgn0032728	Tango6	FBgn0034422	CG7137	FBgn0005411	U2af50	FBgn0034743	RpS16																																					FBgn0032879	CG9317
FBgn0027518	CG7609	FBgn0033656	S2P	FBgn0039338	XNP	FBgn0037489	CG1234	FBgn0029148	NHP2	FBgn0259986	nab																																					FBgn0033778	CG3790
FBgn0036402	CG6650	FBgn0037834	Art1	FBgn0002989	okr	FBgn0032293	Dpy-30L1	FBgn0064225	RpL5	FBgn0035771	sec63																																					FBgn0037143	CG7448
FBgn0040394	CG16903	FBgn0030230	Rph	FBgn0034976	CG4049	FBgn0040232	cmet	FBgn0053993	CG33993	FBgn0041004	CG17715																																					FBgn0036153	CG7573
FBgn0025455	CycT	FBgn0030960	CG7053	FBgn0034299	CG5757	FBgn0004378	Klp61F	FBgn0035656	CG10479	FBgn0025186	ari-2																																					FBgn0050462	ste24c
FBgn0015615	Cap	FBgn0014870	Psi	FBgn0035872	CG7185	FBgn0038590	CG12320	FBgn0001491	l(1)10Bb	FBgn0028541	TM9SF4																																					FBgn0034175	ste24b
FBgn0032465	CG12404	FBgn0037376	CG2051	FBgn0036314	CG10754	FBgn0260648	Rrp40	FBgn0001330	kz	FBgn0032880	CG9318																																					FBgn0038486	CG5265
FBgn0036356	CG10222	FBgn0025463	Bap60	FBgn0004915	TfIIB	FBgn0036916	Mtr3	FBgn0029667	Gas8	FBgn0035622	CG10590																																					FBgn0032471	CG5122
FBgn0039492	CG6051	FBgn0032597	CG17904	FBgn0023518	trr	FBgn0032487	Ski6	FBgn0037009	CG5104	FBgn0031717	Oscillin																																					FBgn0031684	CG8680
FBgn0038856	sec15	FBgn0010421	TfIIFbeta	FBgn0040022	Set1	FBgn0035254	CG7974	FBgn0026749	Yippee	FBgn0038806	CG5412																																					FBgn0019644	ATPsyn-b
FBgn0033899	CG13016	FBgn0030717	CG8931	FBgn0023167	SmD3	FBgn0022764	Sin3A	FBgn0025742	mtm	FBgn0033225	CG1550																																					FBgn0035978	UGP
FBgn0020224	Cbl	FBgn0036548		FBgn0003268	rod	FBgn0025830	IntS8	FBgn0259984	kuz	FBgn0050499	CG30499																																					FBgn0030104	CG15368
FBgn0029689	CG6428	FBgn0002780	mod	FBgn0037809	CG12818	FBgn0039868	CG11563	FBgn0010323	Gsc	FBgn0003714	tko																																					FBgn0033093	CG3270
FBgn0037026	CG3634	FBgn0023216	Parg	FBgn0030915	CG6179	FBgn0037644	CG11964	FBgn0086357	Sec61alpha	FBgn0260468	CG7950																																					FBgn0030478	CG1640
FBgn0035532	CG15014	FBgn0011290	Taf12	FBgn0037567	Gfr	FBgn0022768	Pp2C1	FBgn0034237	eIF3-S9	FBgn0038619	CG7685																																					FBgn0034387	Cyp12b2
FBgn0004913	Gnf1	FBgn0036372	CG10083	FBgn0034503	MED8	FBgn0086361	alph	FBgn0013347	TfIIA-S	FBgn0037299	CG1115																																					FBgn0033387	CG8008
FBgn0029789	CG3160	FBgn0019637	Atu	FBgn0032822	CG10466	FBgn0010228	HmgZ	FBgn0261286	Mat89Ba	FBgn0004901	Prat																																					FBgn0035399	CG14955
FBgn0003187	qua	FBgn0022772	Orc1	FBgn0030196	Psf3	FBgn0004362	HmgD			FBgn0027095	Manf																																					FBgn0028913	CG3473
FBgn0000709	fliI	FBgn0037377	CG1218	FBgn0002542	lds	FBgn0020279	lig			FBgn0033038	CG7791																																					FBgn0035004	Pgam5-2
FBgn0260741	CG3281	FBgn0040087	p115	FBgn0033379	Mys45A	FBgn0034243	ns2			FBgn0031077	CG15618																																					FBgn0039667	CG2010
FBgn0003028	ovo	FBgn0031070	CG12702	FBgn0039233	CG7006	FBgn0000015	Abd-B			FBgn0036921	RhoGDI																																					FBgn0039347	CG5071
FBgn0051453	pch2	FBgn0027532	CG7139	FBgn0028554	x16	FBgn0022063	Pcf11			FBgn0261599	RpS29																																					FBgn0036837	CG18135
FBgn0083962	CG34126	FBgn0037878	CG6693	FBgn0052743		FBgn0035370	CG1240			FBgn0003517	sta																																					FBgn0034588	CG9394
FBgn0038569	CG7218	FBgn0029079	icln	FBgn0004855	RpII15	FBgn0086446	l(2)37Ce			FBgn0038950	CG5382																																					FBgn0038008	CG3942
FBgn0037882	CG17187	FBgn0004391	shtd	FBgn0003277	RpII215	FBgn0261111	BHD			FBgn0025684	MFS18																																					FBgn0031830	CoVb
FBgn0035021	CG4622	FBgn0038805	TFAM	FBgn0052344	CG32344	FBgn0051638	CG31638			FBgn0029785	RpL35																																					FBgn0038733	CG11407
FBgn0031663	CG8891	FBgn0003124	polo	FBgn0032702	CG10376	FBgn0038274	CG7262			FBgn0034138	RpS15																																					FBgn0038732	CG11391
FBgn0024689	fws	FBgn0042085	Bap170	FBgn0035520	CG11586	FBgn0036188	CG7339			FBgn0025640	CG13369																																					FBgn0033733	CG8834
FBgn0004643	mit(1)15	FBgn0036640	nxf2	FBgn0021995	Rs1	FBgn0020496	CtBP			FBgn0010747	Srp54k																																					FBgn0085453	CG34424
FBgn0031060	CG14231	FBgn0037301	Mms19	FBgn0015271	Orc5	FBgn0011291	Taf11			FBgn0001981	esg																																					FBgn0038818	Nep4
FBgn0037728	CG16817	FBgn0027583	CG7601	FBgn0034442	CG11257	FBgn0037700	CG8149			FBgn0035144	CG17181																																					FBgn0031952	cdc14
FBgn0042185	CG18769	FBgn0032728	Tango6	FBgn0015379	dod	FBgn0033571	Rpb5			FBgn0028292	ric8a																																					FBgn0003861	trp
FBgn0039164	CG5524	FBgn0039338	XNP	FBgn0034939	thoc5	FBgn0015279	Pi3K92E			FBgn0031992	CG8498																																					FBgn0005614	trpl
FBgn0028686	Rpt3	FBgn0002989	okr	FBgn0001324	kto	FBgn0031256	CG4164			FBgn0036135	mRpL2																																					FBgn0260008	Ucrh
FBgn0038763	CG4433	FBgn0026380	Prosbeta3	FBgn0034654	CG10306	FBgn0021875	Zfrp8			FBgn0031231	mRpL10																																					FBgn0050354	CG30354
FBgn0028897	CG4935	FBgn0250820	CG5802	FBgn0036018	CG3335	FBgn0037943	CG14722			FBgn0036919	Grasp65																																					FBgn0047038	CG6463
FBgn0039705	CG31033	FBgn0036695	Papst2	FBgn0003205	Ras85D	FBgn0039828	CG1542			FBgn0261606	RpL27A																																					FBgn0037643	skap
FBgn0261278	grp	FBgn0035872	CG7185	FBgn0032388	CG6686	FBgn0025366	Ip259			FBgn0036298	nst																																					FBgn0029963	CG10920
FBgn0035195	Sac1	FBgn0036314	CG10754	FBgn0010709		FBgn0039270	PQBP1			FBgn0030421	CG3812																																					FBgn0039129	RpS19b
FBgn0083953	CG34117	FBgn0259170	alpha-Man-I	FBgn0000140	asp	FBgn0035235	CG7879			FBgn0011509	SrpRbeta																																					FBgn0043783	CG32444
FBgn0260861	Trs23	FBgn0034703	CG3045	FBgn0029693	CG6379	FBgn0041171	ago			FBgn0040373	CG3038																																					FBgn0032372	CG4988
FBgn0039965	CG13865	FBgn0000228	Bsg25D	FBgn0031628	CG3294	FBgn0030720	CG8939			FBgn0021872	Xbp1																																					FBgn0030525	CG10996
FBgn0029885	CG3224	FBgn0004915	TfIIB	FBgn0031238	CG3645	FBgn0034716	Oatp58Dc			FBgn0041174	Vhl																																					FBgn0052445	CG32445
FBgn0065035	AlkB	FBgn0000376	crm	FBgn0039066	EloA	FBgn0001257	ImpL2			FBgn0035482	CG14985																																					FBgn0031428	CG9886
FBgn0033845	mars	FBgn0036856	CG9666	FBgn0037504	CG1142	FBgn0025815	Mcm6			FBgn0036126	CG6272																																					FBgn0039368	CG17196
FBgn0036641	Smn	FBgn0035397	CG11486	FBgn0032401	CG6792	FBgn0033527	CG11777			FBgn0036787	CG4306																																					FBgn0039369	CG17195
FBgn0034057	CG8314	FBgn0025808	Rad17	FBgn0016983	smid	FBgn0261933	SmD1			FBgn0039136	CG5902																																					FBgn0039367	CG17197
FBgn0027453	Dnz1	FBgn0023518	trr	FBgn0259818	CG42399	FBgn0036964	CG6480			FBgn0025700	CG5885																																					FBgn0039366	CG17198
FBgn0033474	CG1407	FBgn0023167	SmD3	FBgn0015773	NetA	FBgn0025186	ari-2			FBgn0036500	CG7275																																					FBgn0039370	CG4956
FBgn0038106	CG7488	FBgn0024698	Cpsf160	FBgn0040273	Spt5	FBgn0034923	Upf3			FBgn0011241	cbx																																					FBgn0042133	CG18810
FBgn0010282	TfIIFalpha	FBgn0037809	CG12818	FBgn0029907	Atx-1	FBgn0028541	TM9SF4			FBgn0037874	Tctp																																					FBgn0034651	CG15676
FBgn0032216	CG5384	FBgn0013773	Cyp6a22	FBgn0034657	LBR	FBgn0032880	CG9318			FBgn0033000	CG14464																																					FBgn0033495	CG12214
FBgn0025352	Thiolase	FBgn0030915	CG6179	FBgn0004646	ogre	FBgn0024887	kin17			FBgn0031376	Der-1																																					FBgn0036499	CG7276
FBgn0034794	Gmer	FBgn0037567	Gfr	FBgn0027108	inx2	FBgn0035689	CG7376			FBgn0015816	Slh																																					FBgn0261611	CG42700
FBgn0037632	Tcp-1eta	FBgn0032822	CG10466	FBgn0028373	inx3	FBgn0004606	zfh1			FBgn0052576	CG32576																																					FBgn0020235	ATPsyn-gamma
FBgn0031267	Ipk2	FBgn0038234	mRpL11	FBgn0035524	CG11583	FBgn0010770	ppan			FBgn0032813	CG10262																																					FBgn0037610	CG8043
FBgn0003744	trc	FBgn0001105	Gbeta13F	FBgn0027564	CG3149	FBgn0011659	Mlh1			FBgn0030245	CG1637																																					FBgn0005619	Hdc
FBgn0023081	gek	FBgn0039252	CG11771	FBgn0086902	kis	FBgn0026778	Rad1			FBgn0022027	Vps25																																					FBgn0034937	fzr2
FBgn0034921	Dcp1	FBgn0029996	Ubc-E2H	FBgn0051357	CG31357	FBgn0032078	C1GalTA			FBgn0030342	CG10347																																					FBgn0034774	CG13526
FBgn0038588	CG7156	FBgn0030890	CG7536	FBgn0033466	Pal1	FBgn0033458	CG18446			FBgn0035767	CG8596																																					FBgn0013348	TpnC41C
FBgn0053182	Kdm4B	FBgn0033379	Mys45A	FBgn0037220	CG14641	FBgn0031356	CG17660			FBgn0040227	eIF-3p66																																					FBgn0033027	TpnC4
FBgn0033233	Kdm4A	FBgn0032251	CG13142	FBgn0031836	CG11050	FBgn0004556	Dbp73D			FBgn0031174	CG1486																																					FBgn0039127	CG13602
FBgn0034433	endoB	FBgn0033479	CG2292	FBgn0039680	CAP-D2	FBgn0004901	Prat			FBgn0260946	exo84																																					FBgn0038745	CG4538
FBgn0034962	MAN1	FBgn0028554	x16	FBgn0039215	CG6695	FBgn0034975	enok			FBgn0001995	mRpL4																																					FBgn0032677	CG5790
FBgn0030522	CG11103	FBgn0004855	RpII15	FBgn0037020	Pex14	FBgn0034970	yki			FBgn0037120	CG11247																																					FBgn0034478	CG10822
FBgn0000077	amx	FBgn0039544	CG12877	FBgn0053520		FBgn0024332	Mcm3			FBgn0038324	CG5038																																					FBgn0028570	robl22E
FBgn0051156	CG31156	FBgn0003277	RpII215	FBgn0035271	CG2021	FBgn0034346	CG12263			FBgn0261403	sxc																																					FBgn0032972	CG10834
FBgn0037250	CG1074	FBgn0032702	CG10376	FBgn0028402	Sin	FBgn0004587	B52			FBgn0086532	Spt-I																																					FBgn0028569	robl37BC
FBgn0035148	CG3402	FBgn0037212	nAcRalpha-80B	FBgn0010355	Taf1	FBgn0027095	Manf			FBgn0034025	GalNAc-T1																																					FBgn0039360	CLS
FBgn0024983	CG4293	FBgn0020407	asun	FBgn0027330	l(1)G0020	FBgn0259240	Ten-a			FBgn0035533	Cip4																																					FBgn0032482	Pect
FBgn0030883	CG7772	FBgn0030658	CG7872	FBgn0024330	MED6	FBgn0033454	CG1671			FBgn0026079	Nsun2																																					FBgn0037520	CG18268
FBgn0034314	nopo	FBgn0035520	CG11586	FBgn0033247	Nup44A	FBgn0031077	CG15618			FBgn0011272	RpL13																																					FBgn0039651	CG14508
FBgn0039210	CG13625	FBgn0021995	Rs1	FBgn0013343	Syx1A	FBgn0261535	l(2)34Fd			FBgn0039218	Rpb10																																					FBgn0017567	ND23
FBgn0261823	Asx	FBgn0015379	dod	FBgn0027605	Vps4	FBgn0030241	feo			FBgn0002021	l(2)37Bb																																					FBgn0031950	Herp
FBgn0031661	Gmd	FBgn0034939	thoc5	FBgn0037661	Ada	FBgn0033902	Tango7			FBgn0031670	CG3887																																					FBgn0037986	CG14736
FBgn0262603	sec8	FBgn0032929	Mcm10	FBgn0037578	CG9601	FBgn0032404	RpL7-like			FBgn0261597	RpS26																																					FBgn0051358	CG31358
FBgn0051549	CG31549	FBgn0034654	CG10306	FBgn0036111	Aps	FBgn0261109	mrn			FBgn0051390	MED7																																					FBgn0250821	CG14644
FBgn0026679	IntS4	FBgn0036018	CG3335	FBgn0000659	fkh	FBgn0013531	MED20			FBgn0010265	RpS13																																					FBgn0038293	CG6904
FBgn0038325	CG6194	FBgn0024912	agt	FBgn0003612	Su(var)2-10	FBgn0001983	wor			FBgn0032509	CG6523																																					FBgn0034007	CG8102
FBgn0035627	Sse	FBgn0040075	rept	FBgn0039234	nct	FBgn0003448	sna			FBgn0032153	CG4537																																					FBgn0034251	CG11423
FBgn0004368	Ptp4E	FBgn0036510	CG7427	FBgn0051301	CG31301	FBgn0032052	CG13089			FBgn0024846	p38b																																					FBgn0031771	CG9140
FBgn0031284	CG3876	FBgn0003205	Ras85D	FBgn0004463	RpIII128	FBgn0033741	CG8545			FBgn0000229	bsk																																					FBgn0030624	CG9106
FBgn0003676	T-cp1	FBgn0032388	CG6686	FBgn0015014		FBgn0003300	run			FBgn0030007	CG2263																																					FBgn0038200	CG9920
FBgn0086784	stmA	FBgn0000499	dsh	FBgn0029665	CG14270	FBgn0261873	sdt			FBgn0030576	CG15890																																					FBgn0038858	CG5793
FBgn0036772	CG5290	FBgn0259168	mnb	FBgn0029713	CG11436	FBgn0034304	CG5742			FBgn0023517	Pgam5																																					FBgn0261259	Fhos
FBgn0041588	ligatin	FBgn0031628	CG3294	FBgn0036090	CG8009	FBgn0039558	CG4980			FBgn0031607	CG15440																																					FBgn0036222	CG5718
FBgn0033475	CG12129	FBgn0037530	CG2943	FBgn0004597	CycC	FBgn0040373	CG3038			FBgn0027287	Gmap																																					FBgn0261439	SdhA
FBgn0085478	CG34449	FBgn0036566	ClC-c	FBgn0028931	CG16863	FBgn0259685	crb			FBgn0013764	Chi																																					FBgn0029745	CG6789
FBgn0031478	CG8814	FBgn0039066	EloA	FBgn0015664	Dref	FBgn0032847	Taf13			FBgn0033665	CG13189																																					FBgn0039635	CG11876
FBgn0024191	sip1	FBgn0034425	CG11906	FBgn0035150	Rev1	FBgn0031485	CG9643			FBgn0050476	ave																																					FBgn0031164	CG1724
FBgn0033812	Pex13	FBgn0032401	CG6792	FBgn0031494	CG17219	FBgn0041174	Vhl			FBgn0028968	gammaCop																																					FBgn0020371	Tim17b2
FBgn0023521	CG3587	FBgn0016983	smid	FBgn0040235	c12.1	FBgn0260938	tay			FBgn0040207	kat80																																					FBgn0038018	Tim17a1
FBgn0030088	CG7039	FBgn0034345	CG5174	FBgn0037684	CG8129	FBgn0035482	CG14985			FBgn0030786	mRpL22																																					FBgn0032519	CG16957
FBgn0031604	Elp3	FBgn0040273	Spt5	FBgn0034986	mRpS17	FBgn0032819	CG10463			FBgn0029709	CHOp24																																					FBgn0031367	c-cup
FBgn0035601	Uev1A	FBgn0029907	Atx-1	FBgn0029094	asf1	FBgn0039136	CG5902			FBgn0030341	p24-1																																					FBgn0051858	t-cup
FBgn0038593	CG7146	FBgn0034657	LBR	FBgn0032479	CG16974	FBgn0011763	Dp			FBgn0024189	sns																																					FBgn0002937	ninaB
FBgn0037688	CG9356	FBgn0035993	Nf-YA	FBgn0034060	CG8370	FBgn0036500	CG7275			FBgn0029082	hbs																																					FBgn0003076	Pgm
FBgn0029798	CG4078	FBgn0035524	CG11583	FBgn0028683	spt4	FBgn0052791	CG32791			FBgn0003285	rst																																					FBgn0034800	CG3788
FBgn0026876	CG11403	FBgn0086902	kis	FBgn0028343	l(1)G0222	FBgn0000617	e(y)1			FBgn0028369	kirre
FBgn0039163	CG5515	FBgn0043799	CG31381	FBgn0031540	CG3238	FBgn0259784				FBgn0000115	Arf72A
FBgn0010314	Cks30A	FBgn0051357	CG31357	FBgn0032517	CG7099	FBgn0034964	IntS1			FBgn0261722	fwe
FBgn0032750	CG10495	FBgn0033466	Pal1	FBgn0031186	CG14614	FBgn0005655	mus209			FBgn0029118	Sucb
FBgn0015621	Clp	FBgn0037220	CG14641	FBgn0261963	mid	FBgn0030245	CG1637			FBgn0030645	CG6308
FBgn0021825	Dmn	FBgn0024542	Neos	FBgn0034380	CG15087	FBgn0022027	Vps25			FBgn0031054	Ssu72
FBgn0015614	CanB2	FBgn0261854	aPKC	FBgn0015609	CadN	FBgn0262139	trh			FBgn0014949	btn
FBgn0028664	VhaM9.7-c	FBgn0031836	CG11050	FBgn0036715	Cad74A	FBgn0003520	stau			FBgn0001319	kn
FBgn0032717	CG10600	FBgn0039680	CAP-D2	FBgn0037963	Cad87A	FBgn0035767	CG8596			FBgn0010412	RpS19a
FBgn0030178	CG2974	FBgn0039215	CG6695	FBgn0032949	Lamp1	FBgn0003732	Top2			FBgn0004603	Src42A
FBgn0000183	BicD	FBgn0053520		FBgn0033376	CG8777	FBgn0034537	DMAP1			FBgn0086904	Nacalpha
FBgn0030366	Usp7	FBgn0034071	CG8405	FBgn0003892	ptc	FBgn0002716	mei-W68			FBgn0050291	CG30291
FBgn0030049	Trf4-1	FBgn0033177	CG11141	FBgn0034242	CG14480	FBgn0001965	Sos			FBgn0039732	CG15525
FBgn0024992	CG2658	FBgn0028700	RfC38	FBgn0031603	CG15432	FBgn0259676	DNApol-alpha60			FBgn0032168	CG13126
FBgn0032873	CG2614	FBgn0035271	CG2021	FBgn0035850	Atg18	FBgn0038324	CG5038			FBgn0030351	CG1840
FBgn0029666	CG10803	FBgn0010355	Taf1	FBgn0011762	DNApol-alpha50	FBgn0031635	CG15626			FBgn0030350	SelG
FBgn0035980	CG4447	FBgn0024330	MED6	FBgn0083940	CG34104	FBgn0036258	CG5642			FBgn0035639	CG5537
FBgn0016041	Tom40	FBgn0033247	Nup44A	FBgn0038855	CG5745	FBgn0086532	Spt-I			FBgn0032035
FBgn0261811	pico	FBgn0038672	CG6005	FBgn0034750	CG3732	FBgn0000163	baz			FBgn0010411	RpS18
FBgn0037199	CG11137	FBgn0038746	Surf6	FBgn0033029	l(2)NC136	FBgn0000411	D			FBgn0261238	Alh
FBgn0039451	CG6420	FBgn0040208	Kat60	FBgn0051957	CG31957	FBgn0036411	Sox21a			FBgn0015777	nrv2
FBgn0033257	CG8713	FBgn0037363	CG1347	FBgn0030361	CG1492	FBgn0024491	Bin1			FBgn0036918	CG7770
FBgn0030514	CG9941	FBgn0037661	Ada	FBgn0035987	CG3689	FBgn0031822	CG9548			FBgn0024196	robl
FBgn0031535	CG12795	FBgn0260484	HIP	FBgn0027868	Nup107	FBgn0026079	Nsun2			FBgn0032258	CG7456
FBgn0002906	mus309	FBgn0029676	HIP-R	FBgn0023129	aay	FBgn0259211	grh			FBgn0039690	CG1969
FBgn0027375	RecQ5	FBgn0037578	CG9601	FBgn0035644	Pole2	FBgn0034879	Rrp4			FBgn0002973	numb
FBgn0028499	CG7985	FBgn0003257	r-l	FBgn0029959	Rab39	FBgn0037926	Elp1			FBgn0037573	eIF4AIII
FBgn0033317	CG8635	FBgn0036111	Aps	FBgn0004049	yrt	FBgn0039218	Rpb10			FBgn0001942	eIF-4a
FBgn0086605	CG9853	FBgn0260858	Ykt6	FBgn0053051	CG33051	FBgn0034176	ste24a			FBgn0030793	CG9125
FBgn0000251	cad	FBgn0038058	CG5608	FBgn0259704	CG42358	FBgn0030873	CG15814			FBgn0030511	CG11158
FBgn0025820	JTBR	FBgn0011655	Med	FBgn0261790	SmE	FBgn0037382	Hpr1			FBgn0032524	CG9267
FBgn0261049	Vps45	FBgn0025825	Hdac3	FBgn0030870	CG6398	FBgn0030474	CG15747			FBgn0038323	CG6196
FBgn0005696	DNApol-alpha73	FBgn0028468	rtet	FBgn0011640	lark	FBgn0039274	CG11920			FBgn0004873
FBgn0037574	Coq2	FBgn0039234	nct	FBgn0015376	cutlet	FBgn0261020	wol			FBgn0005411	U2af50
FBgn0083969	CG34133	FBgn0051301	CG31301	FBgn0036684	CG3764	FBgn0020412	JIL-1			FBgn0029148	NHP2
FBgn0038256	CG7530	FBgn0015014		FBgn0260655	l(3)76BDm	FBgn0011829	Ret			FBgn0032000	CG8372
FBgn0032020	CG7787	FBgn0029665	CG14270	FBgn0052441	CG32441	FBgn0019938	RpI1			FBgn0064225	RpL5
FBgn0051120	CG31120	FBgn0040285	Scamp	FBgn0004132	boca	FBgn0032509	CG6523			FBgn0053993	CG33993
FBgn0261787	bru	FBgn0036090	CG8009	FBgn0038277	RpS5b	FBgn0038927	CG6015			FBgn0035656	CG10479
FBgn0260991	Incenp	FBgn0004597	CycC	FBgn0053474	CG33474	FBgn0032153	CG4537			FBgn0001491	l(1)10Bb
FBgn0027509	CG7261	FBgn0028484	Ack	FBgn0035675	CG6610	FBgn0000229	bsk			FBgn0030435	CG4645
FBgn0083992	Mkp	FBgn0015664	Dref	FBgn0014879	Set	FBgn0038146	CG9799			FBgn0029667	Gas8
FBgn0031044	MKP-4	FBgn0004395	unk	FBgn0027338	Kap-alpha3	FBgn0028382	cyp33			FBgn0037009	CG5104
FBgn0025781	cdc16	FBgn0024833	AP-47	FBgn0035715	CG10103	FBgn0050390	Sgf29			FBgn0026749	Yippee
FBgn0027090	Aats-gln	FBgn0040235	c12.1	FBgn0032956	Cul-2	FBgn0002783	mor			FBgn0000339	cni
FBgn0031286	CG3862	FBgn0035025	uri	FBgn0033260	Cul-4	FBgn0002774	mle			FBgn0024184	unc-4
FBgn0039187	CG6454	FBgn0026616	alpha-Man-IIb	FBgn0029992	Upf2	FBgn0003278	RpI135			FBgn0010704	l(2)s5379
FBgn0029113	Uba2	FBgn0034060	CG8370	FBgn0036710	CG6479	FBgn0028789	Doc1			FBgn0032518	RpL24
FBgn0001108	Gl	FBgn0028343	l(1)G0222	FBgn0052104	CG32104	FBgn0035954	Doc3			FBgn0025742	mtm
FBgn0259979	CG17337	FBgn0031540	CG3238	FBgn0001986	l(2)35Df	FBgn0035956	Doc2			FBgn0038426	mRpS33
FBgn0002524	lace	FBgn0032517	CG7099	FBgn0032846	CG10721	FBgn0031607	CG15440			FBgn0039734	Tace
FBgn0036570	IntS9	FBgn0031186	CG14614	FBgn0039559	Mes-4	FBgn0027287	Gmap			FBgn0030480	Tim9a
FBgn0031996	CG8460	FBgn0034380	CG15087	FBgn0000611	exd	FBgn0040271	Sulf1			FBgn0086357	Sec61alpha
FBgn0033209	CG12107	FBgn0037963	Cad87A	FBgn0000412	D1	FBgn0261791	SmG			FBgn0030099	CG12056
FBgn0243511	psidin	FBgn0003892	ptc	FBgn0027559	Pol32	FBgn0013764	Chi			FBgn0031779	CG9175
FBgn0046214	vig2	FBgn0003210	rb	FBgn0003141	pr	FBgn0027334	l(1)G0004			FBgn0250785	vari
FBgn0038428	CG14894	FBgn0035850	Atg18	FBgn0015772	Nak	FBgn0003425				FBgn0029718	mRpL30
FBgn0000721	for	FBgn0011762	DNApol-alpha50	FBgn0036007	path	FBgn0036733	U4-U6-60K
FBgn0026582	CG9418	FBgn0035916	GAPsec	FBgn0032036	CG13384	FBgn0033059	CG7845
FBgn0033089	CG17266	FBgn0038855	CG5745	FBgn0034032	CG8195	FBgn0015907	bl
FBgn0035027	CG3511	FBgn0261872	scaf6	FBgn0261004	asl	FBgn0021873	Gef26
FBgn0027617	CG5808	FBgn0034750	CG3732	FBgn0025936	Eph	FBgn0029082	hbs
FBgn0014001	Pak	FBgn0051957	CG31957	FBgn0037151	CG7130	FBgn0000547	ed
FBgn0025743	mbt	FBgn0027082	Aats-pro	FBgn0026196	nop5	FBgn0003285	rst
FBgn0038462	CG17556	FBgn0030930	GalNAc-T2	FBgn0031972	Wwox	FBgn0035294	Mfap1
FBgn0027889	ball	FBgn0027868	Nup107	FBgn0032346	Csl4	FBgn0015391	glu
FBgn0027504	CG8878	FBgn0038917	CG6678	FBgn0030364	CG15735	FBgn0038166	CG9588
FBgn0261983	l(2)gd1	FBgn0032863	cdc23	FBgn0038320	Sra-1	FBgn0031054	Ssu72
FBgn0260743	CG18347	FBgn0051687	CG31687	FBgn0036811	MED11	FBgn0014949	btn
FBgn0029929	CG4593	FBgn0004049	yrt	FBgn0025776	ind	FBgn0004603	Src42A
FBgn0032859	Arc-p34	FBgn0027057	CSN1b	FBgn0015331	abs	FBgn0039557	CG12259
FBgn0030791	CG9132	FBgn0054015	CG34015	FBgn0010220	Dbp45A	FBgn0033815	CG4676
FBgn0026787	Nhe1	FBgn0261790	SmE	FBgn0260010	rump	FBgn0032688	CG15160
FBgn0028703	Nhe3	FBgn0030870	CG6398	FBgn0031947	CG7154	FBgn0004595	pros
FBgn0036959	CG6951	FBgn0011640	lark	FBgn0011225	jar	FBgn0039687	CG7593
FBgn0023172	RhoGEF2	FBgn0053214		FBgn0025638	Roc1a	FBgn0011604	Iswi
FBgn0029134	Prosbeta5	FBgn0003720	tll	FBgn0025140	pit	FBgn0034590	Magi
FBgn0015625	CycB3	FBgn0260655	l(3)76BDm	FBgn0003449	snf	FBgn0038057	CG12267
FBgn0000405	CycB	FBgn0004132	boca	FBgn0034035	CG8207	FBgn0000439	Dfd
FBgn0020245	ttv	FBgn0038277	RpS5b	FBgn0036915	CG7757	FBgn0039125	CG5857
FBgn0030177	CG2972	FBgn0035675	CG6610	FBgn0033060	CG7849	FBgn0037815	Rrp46
FBgn0032135	GlcAT-S	FBgn0014879	Set	FBgn0036038	defl	FBgn0086785	Vps36
FBgn0036144	GlcAT-P	FBgn0027338	Kap-alpha3	FBgn0032398	CG6766	FBgn0261570	CG42684
FBgn0066114	GlcAT-I	FBgn0035715	CG10103	FBgn0036734	CG7564	FBgn0261238	Alh
FBgn0038870	Oga	FBgn0015509	lin19	FBgn0029887	CG3198	FBgn0035981	CG4452
FBgn0029733	CG6927	FBgn0029992	Upf2	FBgn0029121	Sras	FBgn0014366	noi
FBgn0017577	Mcm5	FBgn0031640	CG11926	FBgn0036973	Rbbp5	FBgn0027620	Acf1
FBgn0029833	CG5941	FBgn0036710	CG6479	FBgn0023177	Pp4-19C	FBgn0030109	CG12121
FBgn0024291	Sir2	FBgn0001986	l(2)35Df	FBgn0004177	mts	FBgn0036828	CG6841
FBgn0040298	Myt1	FBgn0261353	CG42630	FBgn0031318	CG4887	FBgn0026597	Axn
FBgn0019686	lok	FBgn0030486	Set2	FBgn0035372	CG12093	FBgn0039014	CG6982
FBgn0002283	l(3)73Ah	FBgn0000611	exd	FBgn0037263	slx1	FBgn0041604	dlp
FBgn0041781	SCAR	FBgn0035754	MED4	FBgn0025678	CaBP1	FBgn0002973	numb
FBgn0259166	CG42271	FBgn0000412	D1	FBgn0027784	Prp18	FBgn0037561	CG9630
FBgn0261850	Xpd	FBgn0003141	pr	FBgn0000426	SmF	FBgn0037573	eIF4AIII
FBgn0002787	Mov34	FBgn0261004	asl	FBgn0034422	CG7137	FBgn0001942	eIF-4a
FBgn0028837	CSN6	FBgn0052640	CG32640	FBgn0032395	CG6734	FBgn0260932	cuff
FBgn0030327	FucT6	FBgn0052641	CG32641	FBgn0037489	CG1234	FBgn0030793	CG9125
FBgn0035947	Srp68	FBgn0037150	CG7133	FBgn0031100	CG1504	FBgn0038323	CG6196
FBgn0028695	Rpn1	FBgn0031972	Wwox	FBgn0040232	cmet	FBgn0039600	CG1646
FBgn0030170	CG2990	FBgn0032346	Csl4	FBgn0004378	Klp61F	FBgn0031883	CG11266
FBgn0026192	par-6	FBgn0036398	CG9007	FBgn0035876	Pex2	FBgn0028577	pUf68
FBgn0032170	CG4658	FBgn0036811	MED11	FBgn0038590	CG12320	FBgn0005411	U2af50
FBgn0003165	pum	FBgn0004053	zen	FBgn0260648	Rrp40	FBgn0029148	NHP2
FBgn0034791	CG3501	FBgn0004054	zen2	FBgn0036916	Mtr3	FBgn0035656	CG10479
FBgn0039339	CG5116	FBgn0015331	abs	FBgn0032487	Ski6	FBgn0001491	l(1)10Bb
FBgn0027565	CG5498	FBgn0004837	Su(H)	FBgn0035254	CG7974	FBgn0000283	Cp190
FBgn0045035	tefu	FBgn0260010	rump	FBgn0035688	CG10289	FBgn0030435	CG4645
FBgn0010356	Taf5	FBgn0031947	CG7154	FBgn0031114	cactin	FBgn0030739	CG13957
FBgn0014861	Mcm2	FBgn0025638	Roc1a	FBgn0022764	Sin3A	FBgn0014342	mia
FBgn0086134	Pros25	FBgn0044020	Roc2	FBgn0001219	Hsc70-4	FBgn0051155	Rpb7
FBgn0032234	gny	FBgn0025140	pit	FBgn0035878	CG7182	FBgn0001330	kz
FBgn0033166	Eaf	FBgn0031698	Ncoa6	FBgn0024432	Dlc90F	FBgn0029667	Gas8
FBgn0033187	CG2144	FBgn0003449	snf	FBgn0025830	IntS8	FBgn0026749	Yippee
FBgn0026479	Drp1	FBgn0034035	CG8207	FBgn0010382	CycE	FBgn0036414	nan
FBgn0031544	CG17593	FBgn0036915	CG7757	FBgn0039868	CG11563	FBgn0028978	trbl
FBgn0028380	fal	FBgn0036038	defl	FBgn0037644	CG11964	FBgn0035357	MEP-1
FBgn0053181	CG33181	FBgn0001341	l(1)1Bi	FBgn0033021	CG10417	FBgn0025742	mtm
FBgn0039240	CG3744	FBgn0036734	CG7564	FBgn0086361	alph	FBgn0259984	kuz
FBgn0260795	CG42575	FBgn0029887	CG3198	FBgn0004362	HmgD	FBgn0010323	Gsc
FBgn0035892	exo70	FBgn0029121	Sras	FBgn0010278	Ssrp	FBgn0030099	CG12056
FBgn0010768	sqz	FBgn0016697	Prosalpha5	FBgn0050295	Ipk1	FBgn0034237	eIF3-S9
FBgn0031233	CG11490	FBgn0036973	Rbbp5	FBgn0020279	lig	FBgn0013347	TfIIA-S
FBgn0020270	mre11	FBgn0038303	SIDL	FBgn0034243	ns2	FBgn0261286	Mat89Ba
FBgn0032752	CG10702	FBgn0023177	Pp4-19C	FBgn0035370	CG1240	FBgn0004394	pdm2
FBgn0052380	SMSr	FBgn0004177	mts	FBgn0261111	BHD	FBgn0085424	nub
FBgn0028411	Nxt1	FBgn0031318	CG4887	FBgn0051638	CG31638	FBgn0037660	CG18005
FBgn0001222	Hsf	FBgn0037263	slx1	FBgn0038274	CG7262
FBgn0038318	CG6236	FBgn0027784	Prp18	FBgn0027537	CG11092
FBgn0027603	Ulp1	FBgn0000426	SmF	FBgn0037094	CG7611
FBgn0031422	CG9870	FBgn0032395	CG6734	FBgn0032634	Rpb11
FBgn0261394	Pros29	FBgn0033607	CG9062	FBgn0020496	CtBP
FBgn0045073	Stim	FBgn0032293	Dpy-30L1	FBgn0086448	Gpi1
FBgn0029915	CG14434	FBgn0032243	Klp31E	FBgn0004638	drk
FBgn0027841	CstF-64	FBgn0004378	Klp61F	FBgn0010583	dock
FBgn0086694	Bre1	FBgn0035876	Pex2	FBgn0039110	RanBP3
FBgn0011573	Cdc37	FBgn0031090	Rab35	FBgn0037700	CG8149
FBgn0053100	4EHP	FBgn0035254	CG7974	FBgn0039302	Nup358
FBgn0043458	CG12084	FBgn0038564	CG7785	FBgn0029067	Dd
FBgn0030838	CG5445	FBgn0032259	CG6144	FBgn0052066	CG32066
FBgn0036292	CG10646	FBgn0031114	cactin	FBgn0033571	Rpb5
FBgn0015610		FBgn0016070	smg	FBgn0015279	Pi3K92E
FBgn0035969	CG4476	FBgn0087008	e(y)3	FBgn0015277	Pi3K59F
FBgn0027660	blot	FBgn0037881	CG10703	FBgn0021875	Zfrp8
FBgn0039625	beta4GalNAcTB	FBgn0022764	Sin3A	FBgn0037943	CG14722
FBgn0039258	beta4GalT7	FBgn0001219	Hsc70-4	FBgn0039828	CG1542
FBgn0029502	COQ7	FBgn0035878	CG7182	FBgn0025366	Ip259
FBgn0261647	Axud1	FBgn0024432	Dlc90F	FBgn0039270	PQBP1
FBgn0036107	CG7949	FBgn0027084	Aats-lys	FBgn0026373	RpII33
FBgn0032154	CG5924	FBgn0010315	CycD	FBgn0023423	slmb
FBgn0010905	Spn	FBgn0010382	CycE	FBgn0041171	ago
FBgn0033656	S2P	FBgn0039868	CG11563	FBgn0031216	CG11376
FBgn0037834	Art1	FBgn0033021	CG10417	FBgn0030720	CG8939
FBgn0032791	CG18094	FBgn0022768	Pp2C1	FBgn0034310	Nup75
FBgn0032790	CG10194	FBgn0086361	alph	FBgn0001257	ImpL2
FBgn0032292	CG6750	FBgn0050295	Ipk1	FBgn0004367	mei-41
FBgn0034527	CG9945	FBgn0020279	lig	FBgn0025815	Mcm6
FBgn0037376	CG2051	FBgn0058005	CG40005	FBgn0037611	CG11755
FBgn0025463	Bap60	FBgn0000384	cta	FBgn0034109	CG7747
FBgn0050443	Opbp	FBgn0032596	CG17331	FBgn0033527	CG11777
FBgn0022153	l(2)k05819	FBgn0032961	CG1416	FBgn0035141	Cypl
FBgn0032486	CG5705	FBgn0259234	Camta	FBgn0001624	dlg1
FBgn0031776	CG13993	FBgn0028470	Patr-1	FBgn0010406	RNaseX25
FBgn0010421	TfIIFbeta	FBgn0022063	Pcf11	FBgn0261933	SmD1
FBgn0033052	SCAP	FBgn0035370	CG1240	FBgn0000221	brn
FBgn0051249	CG31249	FBgn0025639	Hmt4-20	FBgn0036964	CG6480
FBgn0038578	MED17	FBgn0086446	l(2)37Ce	FBgn0028541	TM9SF4
FBgn0030717	CG8931	FBgn0036194	CG11652	FBgn0035622	CG10590
FBgn0014417	CG13397	FBgn0038274	CG7262	FBgn0024887	kin17
FBgn0038344	CG5205	FBgn0027537	CG11092	FBgn0005386	ash1
FBgn0002899	mus301	FBgn0011217	eff	FBgn0035689	CG7376
FBgn0035766	eco	FBgn0032634	Rpb11	FBgn0033523	CG12895
FBgn0014024	Rnp4F	FBgn0020496	CtBP	FBgn0010770	ppan
FBgn0023216	Parg	FBgn0261383	IntS6	FBgn0011659	Mlh1
FBgn0034223	Tes	FBgn0086448	Gpi1	FBgn0026778	Rad1
FBgn0011290	Taf12	FBgn0010583	dock	FBgn0037696	CG9362
FBgn0030678	CG11679	FBgn0034051	Mlf	FBgn0032818	CG10628
FBgn0259113	DNApol-alpha180	FBgn0011291	Taf11	FBgn0033458	CG18446
FBgn0036372	CG10083	FBgn0039110	RanBP3	FBgn0261976	Psf2
FBgn0010288	Uch	FBgn0037700	CG8149	FBgn0014075	Ugt
FBgn0019637	Atu	FBgn0039302	Nup358	FBgn0085212	CG34183
FBgn0022772	Orc1	FBgn0029067	Dd	FBgn0026080	Tip60
FBgn0037377	CG1218	FBgn0035421	CG12034	FBgn0039585	CG1894
FBgn0036761	MED19	FBgn0067629	CG33332	FBgn0034975	enok
FBgn0031070	CG12702	FBgn0037156	CG11523	FBgn0053554	Nipped-A
FBgn0027532	CG7139	FBgn0033571	Rpb5	FBgn0024332	Mcm3
FBgn0037878	CG6693	FBgn0015278	Pi3K68D	FBgn0004587	B52
FBgn0030792	CG4789	FBgn0031256	CG4164	FBgn0262169	magu
FBgn0034403	CG18190	FBgn0037943	CG14722	FBgn0259982	l(2)35Cc
FBgn0029079	icln	FBgn0039828	CG1542	FBgn0259240	Ten-a
FBgn0015299	Ssb-c31a	FBgn0001941	ifc	FBgn0033454	CG1671
FBgn0004391	shtd	FBgn0260397	Su(var)3-3	FBgn0032157	Etl1
FBgn0032214	CG4968	FBgn0016917	Stat92E	FBgn0025373	Fpps
FBgn0038805	TFAM	FBgn0261881	l(2)35Be	FBgn0261535	l(2)34Fd
FBgn0003124	polo	FBgn0039270	PQBP1	FBgn0031419	CG15390
FBgn0038196	CG9922	FBgn0026373	RpII33	FBgn0030241	feo
FBgn0035603	CG10635	FBgn0035235	CG7879	FBgn0033902	Tango7
FBgn0042085	Bap170	FBgn0003410	sina	FBgn0032404	RpL7-like
FBgn0011232	scat	FBgn0034988	CG3362	FBgn0037569	tex
FBgn0036028	CG16717	FBgn0041171	ago	FBgn0038235	CG8461
FBgn0001087	g	FBgn0030720	CG8939	FBgn0013531	MED20
FBgn0036640	nxf2	FBgn0034708	Vps35	FBgn0015618	Cdk8
FBgn0003321	sbr	FBgn0023174	Prosbeta2	FBgn0001974	l(2)35Bd
FBgn0027583	CG7601	FBgn0026598	Apc2	FBgn0001981	esg
FBgn0002989	okr	FBgn0037611	CG11755	FBgn0001983	wor
FBgn0034976	CG4049	FBgn0037327	PEK	FBgn0003448	sna
FBgn0034299	CG5757	FBgn0034109	CG7747	FBgn0032052	CG13089
FBgn0026380	Prosbeta3	FBgn0033527	CG11777	FBgn0039271	CG11839
FBgn0013995	Calx	FBgn0035141	Cypl	FBgn0033741	CG8545
FBgn0250820	CG5802	FBgn0032907	CG9272	FBgn0038013	CG10038
FBgn0038524	sll	FBgn0001624	dlg1	FBgn0003300	run
FBgn0036695	Papst2	FBgn0010406	RNaseX25	FBgn0261873	sdt
FBgn0260407	mRpS23	FBgn0038535	alt	FBgn0034304	CG5742
FBgn0035872	CG7185	FBgn0261933	SmD1	FBgn0032200	CG5676
FBgn0259170	alpha-Man-I	FBgn0000221	brn	FBgn0032635	CG15141
FBgn0039634	CG11874	FBgn0041004	CG17715	FBgn0039259	CG11781
FBgn0034735	CG4610	FBgn0022943	Cbp20	FBgn0039558	CG4980
FBgn0034495	CG11788	FBgn0034923	Upf3	FBgn0005634	zip
FBgn0034703	CG3045	FBgn0035622	CG10590	FBgn0035558	CG11357
FBgn0029736	CG4041	FBgn0024887	kin17	FBgn0040373	CG3038
FBgn0054001	CG34001	FBgn0032429	CG5446	FBgn0032847	Taf13
FBgn0000376	crm	FBgn0033523	CG12895	FBgn0031485	CG9643
FBgn0036856	CG9666	FBgn0033897	Rcd1	FBgn0085484	CG34455
FBgn0035397	CG11486	FBgn0030504	CG2691	FBgn0041174	Vhl
FBgn0025808	Rad17	FBgn0020655	Gap69C	FBgn0040477	cid
FBgn0037609	CG9773	FBgn0036580	PDCD-5	FBgn0035674	CG13295
FBgn0023518	trr	FBgn0010770	ppan	FBgn0035482	CG14985
FBgn0027085	Aats-leu	FBgn0037696	CG9362	FBgn0032819	CG10463
FBgn0001233	Hsp83	FBgn0050499	CG30499	FBgn0000588	esc
FBgn0023167	SmD3	FBgn0031057	Ubqn	FBgn0011763	Dp
FBgn0024698	Cpsf160	FBgn0032818	CG10628	FBgn0031668	CG31917
FBgn0003268	rod	FBgn0033752	CG8569	FBgn0036500	CG7275
FBgn0034628	Acox57D-p	FBgn0031157	CG1503	FBgn0052791	CG32791
FBgn0034629	Acox57D-d	FBgn0004655	wapl	FBgn0011241	cbx
FBgn0029924	CG4586	FBgn0030507	CG11164	FBgn0037874	Tctp
FBgn0035907	CG6662	FBgn0027055	CSN3	FBgn0031050	Arp11
FBgn0037809	CG12818	FBgn0261976	Psf2	FBgn0000617	e(y)1
FBgn0031384	CG4238	FBgn0035420	CG14967	FBgn0031309	Tfb4
FBgn0033979	Cyp6a19	FBgn0004556	Dbp73D	FBgn0026566	CG1307
FBgn0013773	Cyp6a22	FBgn0026080	Tip60	FBgn0030054	Caf1-180
FBgn0033121	Cyp6u1	FBgn0014340	mof	FBgn0259784
FBgn0031126	Cyp6v1	FBgn0039585	CG1894	FBgn0034964	IntS1
FBgn0030915	CG6179	FBgn0034975	enok	FBgn0032378	CycY
FBgn0037567	Gfr	FBgn0023175	Prosalpha7	FBgn0005655	mus209
FBgn0034503	MED8	FBgn0004587	B52	FBgn0034186	CG8950
FBgn0030196	Psf3	FBgn0259982	l(2)35Cc	FBgn0000581	E(Pc)
FBgn0030758	CanA-14F	FBgn0010877	l(3)05822	FBgn0033605	CG9067
FBgn0011826	Pp2B-14D	FBgn0036505	CG7945	FBgn0022027	Vps25
FBgn0035440	CG14969	FBgn0025373	Fpps	FBgn0003520	stau
FBgn0039252	CG11771	FBgn0261535	l(2)34Fd	FBgn0003732	Top2
FBgn0002542	lds	FBgn0031419	CG15390	FBgn0000316	cin
FBgn0037531	CG10445	FBgn0033902	Tango7	FBgn0040227	eIF-3p66
FBgn0029996	Ubc-E2H	FBgn0024364	CG11417	FBgn0034537	DMAP1
FBgn0030890	CG7536	FBgn0261986	RASSF8	FBgn0001965	Sos
FBgn0038432	CG14883	FBgn0036309	Hip1	FBgn0259676	DNApol-alpha60
FBgn0032251	CG13142	FBgn0020620	RN-tre	FBgn0038324	CG5038
FBgn0033479	CG2292	FBgn0037569	tex	FBgn0031635	CG15626
FBgn0004855	RpII15	FBgn0038235	CG8461	FBgn0036258	CG5642
FBgn0039544	CG12877	FBgn0015618	Cdk8	FBgn0031519	CG3326
FBgn0003277	RpII215	FBgn0001974	l(2)35Bd	FBgn0261065	Cpsf73
FBgn0028916	CG33090	FBgn0025640	CG13369	FBgn0027873	Cpsf100
FBgn0037212	nAcRalpha-80B	FBgn0010747	Srp54k	FBgn0000163	baz
FBgn0020407	asun	FBgn0037186	CG11241	FBgn0000411	D
FBgn0030658	CG7872	FBgn0031633	CG2976	FBgn0036411	Sox21a
FBgn0015271	Orc5	FBgn0003448	sna	FBgn0024491	Bin1
FBgn0034442	CG11257	FBgn0032052	CG13089	FBgn0031822	CG9548
FBgn0015379	dod	FBgn0004406	tam	FBgn0037624	CG8223
FBgn0034939	thoc5	FBgn0025720	Ate1	FBgn0034879	Rrp4
FBgn0010340	140up	FBgn0028292	ric8a	FBgn0032290	CG6443
FBgn0032929	Mcm10	FBgn0031308	CG4749	FBgn0039218	Rpb10
FBgn0034925	CG5339	FBgn0033741	CG8545	FBgn0034176	ste24a
FBgn0024912	agt	FBgn0038013	CG10038	FBgn0086657	ik2
FBgn0040075	rept	FBgn0003300	run	FBgn0037382	Hpr1
FBgn0027358	Tim9b	FBgn0261873	sdt	FBgn0030474	CG15747
FBgn0036510	CG7427	FBgn0010441	pll	FBgn0039403	Sld5
FBgn0015286	Rala	FBgn0004462	Pk17E	FBgn0086384	Mer
FBgn0026634	ldlCp	FBgn0032635	CG15141	FBgn0029512	Aos1
FBgn0015567		FBgn0039259	CG11781	FBgn0013746	alien
FBgn0026576	CG5991	FBgn0039558	CG4980	FBgn0039274	CG11920
FBgn0033884	CG13344	FBgn0035558	CG11357	FBgn0020497	emb
FBgn0010709		FBgn0052350	CG32350	FBgn0033264	Nup50
FBgn0000499	dsh	FBgn0259685	crb	FBgn0261020	wol
FBgn0027342	fz4	FBgn0032847	Taf13	FBgn0031670	CG3887
FBgn0259168	mnb	FBgn0035482	CG14985	FBgn0051390	MED7
FBgn0027497	Madm	FBgn0011481	Ssdp	FBgn0032509	CG6523
FBgn0031464	Duox	FBgn0027587	CG7028	FBgn0038927	CG6015
FBgn0030352	CG15738	FBgn0039943	CG17168	FBgn0032153	CG4537
FBgn0039385	CG5913	FBgn0011763	Dp	FBgn0021856	l(2)k14505
FBgn0000140	asp	FBgn0031668	CG31917	FBgn0000449	dib
FBgn0031006	rictor	FBgn0036500	CG7275	FBgn0038146	CG9799
FBgn0031238	CG3645	FBgn0037874	Tctp	FBgn0025615	Torsin
FBgn0038467	CG3590	FBgn0000617	e(y)1	FBgn0031897	CG13784
FBgn0037530	CG2943	FBgn0033000	CG14464	FBgn0028382	cyp33
FBgn0036566	ClC-c	FBgn0031309	Tfb4	FBgn0002783	mor
FBgn0038206	twf	FBgn0026566	CG1307	FBgn0002774	mle
FBgn0040309	Jafrac1	FBgn0030054	Caf1-180	FBgn0028789	Doc1
FBgn0039461	CG5500	FBgn0024909	Taf7	FBgn0035954	Doc3
FBgn0001404	egh	FBgn0030053	CG12081	FBgn0035956	Doc2
FBgn0039066	EloA	FBgn0032378	CycY	FBgn0031607	CG15440
FBgn0034918	wibg	FBgn0005655	mus209	FBgn0040271	Sulf1
FBgn0034643	CG10321	FBgn0000581	E(Pc)	FBgn0261791	SmG
FBgn0034425	CG11906	FBgn0033605	CG9067	FBgn0040339	MED22
FBgn0038424	CG17565	FBgn0259742	CG42360	FBgn0036386	CG8833
FBgn0016983	smid	FBgn0030342	CG10347	FBgn0250837	dUTPase
FBgn0037756	CG8507	FBgn0051119	HdacX	FBgn0003425
FBgn0053158	CG33158	FBgn0262115	CG17683	FBgn0036615	CG4933
FBgn0037533	CD98hc	FBgn0003732	Top2	FBgn0050476	ave
FBgn0032988	Tif-IA	FBgn0037262	MED31	FBgn0036733	U4-U6-60K
FBgn0261797	Dhc64C	FBgn0000316	cin	FBgn0011836	Taf2
FBgn0003656	sws	FBgn0011586	e(r)	FBgn0033059	CG7845
FBgn0261276	opa1-like	FBgn0040227	eIF-3p66	FBgn0015907	bl
FBgn0024177	zpg	FBgn0034537	DMAP1	FBgn0021873	Gef26
FBgn0035993	Nf-YA	FBgn0031413	CG9967	FBgn0030711	Rrp47
FBgn0026076	UBL3	FBgn0033236	CG14764	FBgn0035294	Mfap1
FBgn0027329	Tcp-1zeta	FBgn0261403	sxc	FBgn0010762	simj
FBgn0035402	CG12082	FBgn0036258	CG5642	FBgn0040346	CG3704
FBgn0024542	Neos	FBgn0031519	CG3326	FBgn0015391	glu
FBgn0261854	aPKC	FBgn0027873	Cpsf100	FBgn0260464	CG9288
FBgn0039215	CG6695	FBgn0039691	IntS11	FBgn0086895	pea
FBgn0037020	Pex14	FBgn0034066	CG8397	FBgn0260456	CG4806
FBgn0034071	CG8405	FBgn0000163	baz	FBgn0030269	CG18292
FBgn0037622	CG8202	FBgn0000411	D	FBgn0027548	nito
FBgn0086679	p	FBgn0024491	Bin1	FBgn0004603	Src42A
FBgn0033177	CG11141	FBgn0031822	CG9548	FBgn0039557	CG12259
FBgn0004889	tws	FBgn0037624	CG8223	FBgn0036450	CG13472
FBgn0028700	RfC38	FBgn0029840	raptor	FBgn0036670	CG13029
FBgn0035271	CG2021	FBgn0262117	IntS3	FBgn0033815	CG4676
FBgn0261067	LSm1	FBgn0032290	CG6443	FBgn0032688	CG15160
FBgn0010355	Taf1	FBgn0010280	Taf4	FBgn0039732	CG15525
FBgn0024330	MED6	FBgn0034176	ste24a	FBgn0037773	CG5359
FBgn0038747	RhoGAP92B	FBgn0039543	CG12428	FBgn0039687	CG7593
FBgn0033247	Nup44A	FBgn0261458	capt	FBgn0011604	Iswi
FBgn0034401	CG15100	FBgn0038722	Nup58	FBgn0034590	Magi
FBgn0038672	CG6005	FBgn0037382	Hpr1	FBgn0038057	CG12267
FBgn0030625	CG5877	FBgn0030474	CG15747	FBgn0000439	Dfd
FBgn0022786	Hira	FBgn0039403	Sld5	FBgn0034084	CG8435
FBgn0030268	Klp10A	FBgn0086384	Mer	FBgn0034402	CG15084
FBgn0037342	CG2931	FBgn0029512	Aos1	FBgn0039125	CG5857
FBgn0033882		FBgn0013746	alien	FBgn0037815	Rrp46
FBgn0027605	Vps4	FBgn0039274	CG11920	FBgn0086785	Vps36
FBgn0040208	Kat60	FBgn0020497	emb	FBgn0036518	RhoGAP71E
FBgn0037363	CG1347	FBgn0033264	Nup50	FBgn0261570	CG42684
FBgn0037578	CG9601	FBgn0261020	wol	FBgn0028737	Ef1beta
FBgn0029704	CG2982	FBgn0031670	CG3887	FBgn0015925	csul
FBgn0010438	mtSSB	FBgn0026238	gus	FBgn0053096	CG33096
FBgn0023515	CG14814	FBgn0003575	su(s)	FBgn0033315	beta3GalTII
FBgn0036111	Aps	FBgn0036629	CG4573	FBgn0032035
FBgn0260858	Ykt6	FBgn0003733	tor	FBgn0035981	CG4452
FBgn0038058	CG5608	FBgn0051390	MED7	FBgn0017545	RpS3A
FBgn0045063	fdl	FBgn0001978	stc	FBgn0043455	CG5986
FBgn0011655	Med	FBgn0038927	CG6015	FBgn0014366	noi
FBgn0029819	CG3016	FBgn0021856	l(2)k14505	FBgn0261241	Vps16A
FBgn0025825	Hdac3	FBgn0000449	dib	FBgn0027620	Acf1
FBgn0003612	Su(var)2-10	FBgn0036449	bmm	FBgn0034452	Oseg6
FBgn0028468	rtet	FBgn0030607	dob	FBgn0260749	Utx
FBgn0036578		FBgn0000173	ben	FBgn0024196	robl
FBgn0260659	CG42542	FBgn0023517	Pgam5	FBgn0039930	CG11077
FBgn0026702	l(1)G0045	FBgn0025615	Torsin	FBgn0004957	por
FBgn0029713	CG11436	FBgn0050390	Sgf29	FBgn0036828	CG6841
FBgn0260817	gkt	FBgn0002783	mor	FBgn0026597	Axn
FBgn0051953	CR31953	FBgn0030802	CG9099	FBgn0039014	CG6982
FBgn0042693	PP2A-B'	FBgn0031607	CG15440	FBgn0022942	Cbp80
FBgn0027492	wdb	FBgn0261791	SmG	FBgn0261985	Ptpmeg
FBgn0036090	CG8009	FBgn0033762	CG8632	FBgn0037573	eIF4AIII
FBgn0004597	CycC	FBgn0013764	Chi	FBgn0001942	eIF-4a
FBgn0028484	Ack	FBgn0040339	MED22	FBgn0004110	tin
FBgn0020440	Fak56D	FBgn0250837	dUTPase	FBgn0031711	CG6907
FBgn0037141	DNApol-eta	FBgn0035641	CG5568	FBgn0035145	MED14
FBgn0035150	Rev1	FBgn0033665	CG13189	FBgn0030943	CG6540
FBgn0004395	unk	FBgn0050476	ave	FBgn0260932	cuff
FBgn0028648	mRpL50	FBgn0011836	Taf2	FBgn0030510	CG12177
FBgn0024833	AP-47	FBgn0040239	bc10	FBgn0026378	Rep
FBgn0030345	CG1847	FBgn0259985	Mppe	FBgn0039600	CG1646
FBgn0003218	rdgB	FBgn0030141	Gga	FBgn0031883	CG11266
FBgn0011703	RnrL	FBgn0033059	CG7845	FBgn0028577	pUf68
FBgn0030092	fh	FBgn0015907	bl	FBgn0005411	U2af50
FBgn0035025	uri	FBgn0029935	CG4615	FBgn0035656	CG10479
FBgn0002641	mal	FBgn0030711	Rrp47	FBgn0001491	l(1)10Bb
FBgn0026616	alpha-Man-IIb	FBgn0035866	CG7197	FBgn0000283	Cp190
FBgn0011740	alpha-Man-II	FBgn0000115	Arf72A	FBgn0027499	wde
FBgn0029094	asf1	FBgn0035294	Mfap1	FBgn0259199	CG42303
FBgn0034060	CG8370	FBgn0051159	EF-G2	FBgn0030739	CG13957
FBgn0028992	sds22	FBgn0010762	simj	FBgn0035624	Eaf6
FBgn0028683	spt4	FBgn0040346	CG3704	FBgn0051155	Rpb7
FBgn0037566	mRpL1	FBgn0015391	glu	FBgn0026749	Yippee
FBgn0028343	l(1)G0222	FBgn0014037	Su(Tpl)	FBgn0038300	CG4203
FBgn0262582	cic	FBgn0000146	aub	FBgn0036414	nan
FBgn0024251	bbx	FBgn0037540	Pbp95	FBgn0028978	trbl
FBgn0031540	CG3238	FBgn0260464	CG9288	FBgn0035640	mad2
FBgn0086676	spin	FBgn0000606	eve	FBgn0035357	MEP-1
FBgn0029594	CG14806	FBgn0086895	pea	FBgn0033686	Hen1
FBgn0032517	CG7099	FBgn0260456	CG4806	FBgn0031768	CG12393
FBgn0037297	CG1116	FBgn0003169	put	FBgn0259984	kuz
FBgn0031186	CG14614	FBgn0030269	CG18292	FBgn0000414	Dab
FBgn0259482	Mob3	FBgn0027548	nito	FBgn0010323	Gsc
FBgn0034380	CG15087	FBgn0039557	CG12259	FBgn0030480	Tim9a
FBgn0001225	Hsp26	FBgn0036450	CG13472	FBgn0053198	pen-2
FBgn0030096	Zpr1	FBgn0036291	CG10681	FBgn0034237	eIF3-S9
FBgn0085224	CG34195	FBgn0039732	CG15525	FBgn0013347	TfIIA-S
FBgn0003210	rb	FBgn0033055	tbce	FBgn0261286	Mat89Ba
FBgn0053558	mim	FBgn0037773	CG5359	FBgn0000109	Aprt
FBgn0011762	DNApol-alpha50	FBgn0260439	Pp2A-29B	FBgn0036486	Msh6
FBgn0038855	CG5745	FBgn0011604	Iswi	FBgn0004394	pdm2
FBgn0003654	sw	FBgn0038057	CG12267	FBgn0085424	nub
FBgn0051957	CG31957	FBgn0034084	CG8435	FBgn0010422	TfIIS
FBgn0260945	Atg1	FBgn0034402	CG15084
FBgn0030932	Ggt-1	FBgn0036518	RhoGAP71E
FBgn0030361	CG1492	FBgn0001139	gro
FBgn0031217	CG11377	FBgn0028737	Ef1beta
FBgn0035987	CG3689	FBgn0032198	eEF1delta
FBgn0023510	Rbcn-3B	FBgn0015925	csul
FBgn0030930	GalNAc-T2	FBgn0053096	CG33096
FBgn0027868	Nup107	FBgn0032925	CG9246
FBgn0010379	Akt1	FBgn0035639	CG5537
FBgn0035644	Pole2	FBgn0031606	CG15439
FBgn0037084	Syx6	FBgn0035981	CG4452
FBgn0038917	CG6678	FBgn0035416	gry
FBgn0053172	CG33172	FBgn0025803
FBgn0031882	Rab30	FBgn0043455	CG5986
FBgn0032863	cdc23	FBgn0014366	noi
FBgn0051687	CG31687	FBgn0038772	CG4973
FBgn0004049	yrt	FBgn0034046	tun
FBgn0027057	CSN1b	FBgn0260749	Utx
FBgn0028688	Rpn7	FBgn0027054	CSN4
FBgn0033087	Hsepi	FBgn0030109	CG12121
FBgn0054015	CG34015	FBgn0039930	CG11077
FBgn0031062	CG14230	FBgn0004957	por
FBgn0261790	SmE	FBgn0050382	CG30382
FBgn0015376	cutlet	FBgn0026597	Axn
FBgn0030964	Pvf1	FBgn0022942	Cbp80
FBgn0039664	CG2006	FBgn0028341	l(1)G0232
FBgn0020261	pcm	FBgn0261985	Ptpmeg
FBgn0053214		FBgn0011802	Gem3
FBgn0051133	Slimp	FBgn0037573	eIF4AIII
FBgn0021750	Aats-ser	FBgn0029152	Mkrn1
FBgn0036684	CG3764	FBgn0031711	CG6907
FBgn0260655	l(3)76BDm	FBgn0034091	mrj
FBgn0038167	lkb1	FBgn0035145	MED14
FBgn0040056	CG17698	FBgn0030943	CG6540
FBgn0034073	CG8414	FBgn0037702	CG8176
FBgn0015562	veg	FBgn0026378	Rep
FBgn0028479	Mtpalpha	FBgn0039600	CG1646
FBgn0038277	RpS5b	FBgn0038293	CG6904
FBgn0035675	CG6610	FBgn0005649	Rox8
FBgn0027338	Kap-alpha3	FBgn0031883	CG11266
FBgn0033183	CG1620	FBgn0028577	pUf68
FBgn0035715	CG10103	FBgn0005411	U2af50
FBgn0062449	CG13197	FBgn0023212	Elongin-B
FBgn0027948	msps	FBgn0032000	CG8372
FBgn0011787	mRpL12	FBgn0024188	san
FBgn0040268	Top3alpha	FBgn0001491	l(1)10Bb
FBgn0026015	Top3beta	FBgn0000283	Cp190
FBgn0038437	CG14898	FBgn0027499	wde
FBgn0039632	Cul-5	FBgn0031643	CG3008
FBgn0015509	lin19	FBgn0036187	CG11660
FBgn0032956	Cul-2	FBgn0259199	CG42303
FBgn0033260	Cul-4	FBgn0035624	Eaf6
FBgn0037384	dgrn	FBgn0051155	Rpb7
FBgn0031640	CG11926	FBgn0030946	CG6659
FBgn0036710	CG6479	FBgn0033463	CG1513
FBgn0052104	CG32104	FBgn0038300	CG4203
FBgn0037018	CG4042	FBgn0028978	trbl
FBgn0034081	CG10731	FBgn0035640	mad2
FBgn0016641	PTP-ER	FBgn0017581	Lk6
FBgn0034727	mRpS29	FBgn0086899	tlk
FBgn0030800	CG9104	FBgn0035357	MEP-1
FBgn0030486	Set2	FBgn0033686	Hen1
FBgn0039559	Mes-4	FBgn0031768	CG12393
FBgn0035754	MED4	FBgn0259984	kuz
FBgn0030554	CG1434	FBgn0000414	Dab
FBgn0051450	mRpS18A	FBgn0034237	eIF3-S9
FBgn0027559	Pol32	FBgn0013347	TfIIA-S
FBgn0015772	Nak	FBgn0261286	Mat89Ba
FBgn0032512	CG9305	FBgn0015360	oxt
FBgn0030817	CG4991	FBgn0010422	TfIIS
FBgn0034032	CG8195	FBgn0037660	CG18005
FBgn0038168	omd
FBgn0261479	nero
FBgn0261004	asl
FBgn0011742	Arp14D
FBgn0037151	CG7130
FBgn0037150	CG7133
FBgn0051648	CG31648
FBgn0031972	Wwox
FBgn0030364	CG15735
FBgn0036648	CG4098
FBgn0036398	CG9007
FBgn0015075	Ddx1
FBgn0004837	Su(H)
FBgn0031947	CG7154
FBgn0030330	Tango10
FBgn0031698	Ncoa6
FBgn0031820	DLP
FBgn0031815	frj
FBgn0026630	nes
FBgn0036038	defl
FBgn0036668	CG9715
FBgn0052579	CG32579
FBgn0029887	CG3198
FBgn0037716	CG8273
FBgn0029121	Sras
FBgn0016697	Prosalpha5
FBgn0038303	SIDL
FBgn0035372	CG12093
FBgn0037263	slx1
FBgn0027568	Cand1
FBgn0023527	CG3071
FBgn0000426	SmF
FBgn0261698	CG42732
FBgn0032395	CG6734
FBgn0033607	CG9062
FBgn0032293	Dpy-30L1
FBgn0040232	cmet
FBgn0004378	Klp61F
FBgn0035876	Pex2
FBgn0031090	Rab35
FBgn0035942	CG5660
FBgn0035254	CG7974
FBgn0038564	CG7785
FBgn0032259	CG6144
FBgn0031114	cactin
FBgn0016070	smg
FBgn0087008	e(y)3
FBgn0037881	CG10703
FBgn0053505	U3-55K
FBgn0022764	Sin3A
FBgn0035878	CG7182
FBgn0024432	Dlc90F
FBgn0064126	CG33722
FBgn0033339	sec31
FBgn0036255	Atg12
FBgn0039056	cenB1A
FBgn0025830	IntS8
FBgn0027084	Aats-lys
FBgn0010097	gammaTub37C
FBgn0010315	CycD
FBgn0010382	CycE
FBgn0022768	Pp2C1
FBgn0035425	CG17746
FBgn0010278	Ssrp
FBgn0050295	Ipk1
FBgn0061515	endos
FBgn0058005	CG40005
FBgn0000384	cta
FBgn0032596	CG17331
FBgn0032961	CG1416
FBgn0259234	Camta
FBgn0028470	Patr-1
FBgn0028421	Kap3
FBgn0025639	Hmt4-20
FBgn0023519	mRpL16
FBgn0034704	CG6758
FBgn0036897	CG8786
FBgn0028687	Rpt1
FBgn0020626	Osbp
FBgn0035951	CG5068
FBgn0027537	CG11092
FBgn0039117	tst
FBgn0261383	IntS6
FBgn0011291	Taf11
FBgn0015582	dare
FBgn0261436	DhpD
FBgn0023531	CG32809
FBgn0039110	RanBP3
FBgn0024956	Mat1
FBgn0039302	Nup358
FBgn0259178	5PtaseI
FBgn0029067	Dd
FBgn0037884	CG17184
FBgn0035421	CG12034
FBgn0052066	CG32066
FBgn0067629	CG33332
FBgn0030343	ATP7
FBgn0050389	CG30389
FBgn0037156	CG11523
FBgn0015279	Pi3K92E
FBgn0015278	Pi3K68D
FBgn0017448	CG2187
FBgn0038145	Droj2
FBgn0001941	ifc
FBgn0037606	CG8032
FBgn0260397	Su(var)3-3
FBgn0261881	l(2)35Be
FBgn0041585	olf186-F
FBgn0026373	RpII33
FBgn0003410	sina
FBgn0023423	slmb
FBgn0040823	dpr6
FBgn0036770	Prestin
FBgn0034708	Vps35
FBgn0023174	Prosbeta2
FBgn0034310	Nup75
FBgn0004367	mei-41
FBgn0030506	Lig4
FBgn0026598	Apc2
FBgn0015589	Apc
FBgn0025815	Mcm6
FBgn0030346	CG11802
FBgn0037611	CG11755
FBgn0031115	CG11710
FBgn0086443	Aats-asn
FBgn0037327	PEK
FBgn0035141	Cypl
FBgn0032907	CG9272
FBgn0261933	SmD1
FBgn0000221	brn
FBgn0030286	CG1657
FBgn0041004	CG17715
FBgn0025186	ari-2
FBgn0022943	Cbp20
FBgn0034923	Upf3
FBgn0005386	ash1
FBgn0040236	c11.1
FBgn0035689	CG7376
FBgn0038806	CG5412
FBgn0036614	CG4925
FBgn0032721	CG10602
FBgn0033897	Rcd1
FBgn0030504	CG2691
FBgn0031094	CG9578
FBgn0020655	Gap69C
FBgn0036580	PDCD-5
FBgn0052654	Sec16
FBgn0011659	Mlh1
FBgn0026778	Rad1
FBgn0050499	CG30499
FBgn0036239	Pop2
FBgn0031057	Ubqn
FBgn0032818	CG10628
FBgn0261972
FBgn0011207	pelo
FBgn0033752	CG8569
FBgn0003714	tko
FBgn0030431	CG4407
FBgn0011768	Fdh
FBgn0038619	CG7685
FBgn0032643	CG6453
FBgn0030121	Cfp1
FBgn0031356	CG17660
FBgn0000257	car
FBgn0004655	wapl
FBgn0039877	CG2118
FBgn0038429	CG14882
FBgn0029913	Cht11
FBgn0030507	CG11164
FBgn0027055	CSN3
FBgn0261976	Psf2
FBgn0014075	Ugt
FBgn0035420	CG14967
FBgn0034269	CG6406
FBgn0004901	Prat
FBgn0085212	CG34183
FBgn0026080	Tip60
FBgn0014340	mof
FBgn0039585	CG1894
FBgn0034970	yki
FBgn0061362	CG33785
FBgn0024332	Mcm3
FBgn0259152	Clbn
FBgn0023175	Prosalpha7
FBgn0262169	magu
FBgn0259982	l(2)35Cc
FBgn0032157	Etl1
FBgn0010877	l(3)05822
FBgn0033309	CG8735
FBgn0031419	CG15390
FBgn0030242	sofe
FBgn0030241	feo
FBgn0067628	CG33331
FBgn0029853	CG3781
FBgn0039849	CG11334
FBgn0030612	CG5599
FBgn0027091	Aats-cys
FBgn0003557	Su(dx)
FBgn0259174	Nedd4
FBgn0035891	Oseg1
FBgn0052243	CG32243
FBgn0036689	CG7730
FBgn0024364	CG11417
FBgn0033713	CG8841
FBgn0261986	RASSF8
FBgn0025684	MFS18
FBgn0038968	CG12499
FBgn0038401	CG5916
FBgn0020620	RN-tre
FBgn0261109	mrn
FBgn0028274	ns3
FBgn0013531	MED20
FBgn0035867	CG13671
FBgn0015618	Cdk8
FBgn0001974	l(2)35Bd
FBgn0031818	CG9536
FBgn0017561	Ork1
FBgn0031633	CG2976
FBgn0002044	swm
FBgn0032052	CG13089
FBgn0039271	CG11839
FBgn0033342	CG8258
FBgn0033391	CG8026
FBgn0004406	tam
FBgn0025720	Ate1
FBgn0028292	ric8a
FBgn0031308	CG4749
FBgn0038013	CG10038
FBgn0021765	scu
FBgn0031231	mRpL10
FBgn0034304	CG5742
FBgn0010441	pll
FBgn0032005	Snx6
FBgn0016698	Ptpa
FBgn0004462	Pk17E
FBgn0032635	CG15141
FBgn0020379	Rfx
FBgn0030421	CG3812
FBgn0039558	CG4980
FBgn0035558	CG11357
FBgn0052350	CG32350
FBgn0013563	Pex1
FBgn0034728	rad50
FBgn0038446	CG14903
FBgn0031536	Cog3
FBgn0040477	cid
FBgn0260938	tay
FBgn0011481	Ssdp
FBgn0031392	AIF
FBgn0066304	Rpp20
FBgn0085377	CG34348
FBgn0027587	CG7028
FBgn0034141	CG8311
FBgn0039943	CG17168
FBgn0030606
FBgn0032391	escl
FBgn0000588	esc
FBgn0052484	Sk2
FBgn0037603	CG11753
FBgn0031050	Arp11
FBgn0031309	Tfb4
FBgn0026566	CG1307
FBgn0032451	spict
FBgn0036844	Mkp3
FBgn0039702	Vps16B
FBgn0030054	Caf1-180
FBgn0038438	Der-2
FBgn0024909	Taf7
FBgn0033075	Pld
FBgn0034964	IntS1
FBgn0030053	CG12081
FBgn0262103	Sik3
FBgn0005655	mus209
FBgn0034186	CG8950
FBgn0000581	E(Pc)
FBgn0035024	CG11414
FBgn0022027	Vps25
FBgn0031061	CG14232
FBgn0030342	CG10347
FBgn0026738	CG7857
FBgn0015268	Nap1
FBgn0037262	MED31
FBgn0000316	cin
FBgn0020392	Nmt
FBgn0011586	e(r)
FBgn0034537	DMAP1
FBgn0031174	CG1486
FBgn0001965	Sos
FBgn0031413	CG9967
FBgn0259676	DNApol-alpha60
FBgn0260946	exo84
FBgn0030646	CG9203
FBgn0039293	CG11851
FBgn0033236	CG14764
FBgn0031635	CG15626
FBgn0046704	Liprin-alpha
FBgn0035266	Gk
FBgn0033673	CG8298
FBgn0031519	CG3326
FBgn0261065	Cpsf73
FBgn0027873	Cpsf100
FBgn0039691	IntS11
FBgn0086532	Spt-I
FBgn0037144	CG7458
FBgn0031822	CG9548
FBgn0037624	CG8223
FBgn0031188	CG14613
FBgn0002887	mus201
FBgn0012058	Cdc27
FBgn0039966	Rab21
FBgn0029840	raptor
FBgn0013548	l(2)dtl
FBgn0086370	sra
FBgn0010280	Taf4
FBgn0034176	ste24a
FBgn0039543	CG12428
FBgn0261458	capt
FBgn0038617	CG12333
FBgn0038722	Nup58
FBgn0030873	CG15814
FBgn0030871	CG8142
FBgn0086657	ik2
FBgn0024222	ird5
FBgn0037382	Hpr1
FBgn0053936
FBgn0033083	Dpit47
FBgn0039403	Sld5
FBgn0086384	Mer
FBgn0029512	Aos1
FBgn0033264	Nup50
FBgn0026238	gus
FBgn0043010	Fsn
FBgn0015282	Pros26.4
FBgn0003575	su(s)
FBgn0036629	CG4573
FBgn0003733	tor
FBgn0001978	stc
FBgn0261285	Ppcs
FBgn0021856	l(2)k14505
FBgn0024846	p38b
FBgn0030007	CG2263
FBgn0030607	dob
FBgn0015778	rin
FBgn0000173	ben
FBgn0023517	Pgam5
FBgn0025615	Torsin
FBgn0000562	egl
FBgn0050390	Sgf29
FBgn0030802	CG9099
FBgn0004419	me31B
FBgn0035166	CG13902
FBgn0261791	SmG
FBgn0033762	CG8632
FBgn0013764	Chi
FBgn0040339	MED22
FBgn0035435	CG12077
FBgn0036386	CG8833
FBgn0250837	dUTPase
FBgn0035641	CG5568
FBgn0035642	CG18586
FBgn0024194	rasp
FBgn0040397	CG3655
FBgn0024314	Plap
FBgn0036615	CG4933
FBgn0037339	Pi4KIIalpha
FBgn0050476	ave
FBgn0015240	Hr96
FBgn0040207	kat80
FBgn0036733	U4-U6-60K
FBgn0031020	Nat1
FBgn0028962	Aats-ala-m
FBgn0027094	Aats-ala
FBgn0260935	ird1
FBgn0034455	CG11007
FBgn0261938	mtRNApol
FBgn0011836	Taf2
FBgn0040239	bc10
FBgn0259985	Mppe
FBgn0031997	CG8455
FBgn0030141	Gga
FBgn0051224	CG31224
FBgn0035965	Use1
FBgn0021873	Gef26
FBgn0029935	CG4615
FBgn0030711	Rrp47
FBgn0035866	CG7197
FBgn0000115	Arf72A
FBgn0002791	mr
FBgn0051159	EF-G2
FBgn0010762	simj
FBgn0040346	CG3704
FBgn0015391	glu
FBgn0014037	Su(Tpl)
FBgn0000146	aub
FBgn0004872	piwi
FBgn0037540	Pbp95
FBgn0036843	CG6812
FBgn0036336	ste14
FBgn0260464	CG9288
FBgn0031054	Ssu72
FBgn0086895	pea
FBgn0086475	sec3
FBgn0030086	CG7033
FBgn0003169	put
FBgn0035437	CG11526
FBgn0027548	nito
FBgn0036450	CG13472
FBgn0034729	CG10344
FBgn0040212	Dhap-at
FBgn0037369	CG2100
FBgn0032688	CG15160
FBgn0035243	CG13926
FBgn0031611	CG17840
FBgn0037893
FBgn0033055	tbce
FBgn0037773	CG5359
FBgn0011297	l(2)not
FBgn0085437	CG34408
FBgn0032168	CG13126
FBgn0034590	Magi
FBgn0035449	CG14971
FBgn0037368	CG1239
FBgn0034084	CG8435
FBgn0034402	CG15084
FBgn0030528	CG11095
FBgn0039125	CG5857
FBgn0038376	Hmt-1
FBgn0051694	CG31694
FBgn0032924	Nbr
FBgn0036518	RhoGAP71E
FBgn0001139	gro
FBgn0037116	CG7158
FBgn0015925	csul
FBgn0050410	Rpi
FBgn0030276	Dlic
FBgn0030321	CG1703
FBgn0033315	beta3GalTII
FBgn0035639	CG5537
FBgn0261238	Alh
FBgn0031606	CG15439
FBgn0035416	gry
FBgn0039126	CG13601
FBgn0030573	nmdyn-D6
FBgn0025803
FBgn0043455	CG5986
FBgn0038772	CG4973
FBgn0027620	Acf1
FBgn0034046	tun
FBgn0028360	l(1)G0148
FBgn0052076	Alg10
FBgn0034452	Oseg6
FBgn0028690	Rpn5
FBgn0027054	CSN4
FBgn0030109	CG12121
FBgn0039930	CG11077
FBgn0004957	por
FBgn0036828	CG6841
FBgn0026597	Axn
FBgn0022942	Cbp80
FBgn0028341	l(1)G0232
FBgn0261985	Ptpmeg
FBgn0029092	ced-6
FBgn0000114	aret
FBgn0003464	sol
FBgn0031710	CG7371
FBgn0038313	CG4338
FBgn0011802	Gem3
FBgn0046114	Gclm
FBgn0029152	Mkrn1
FBgn0023545	CG4406
FBgn0031711	CG6907
FBgn0035026	Fcp1
FBgn0026143	CDC45L
FBgn0035145	MED14
FBgn0030943	CG6540
FBgn0259937	Nop60B
FBgn0260932	cuff
FBgn0037702	CG8176
FBgn0026378	Rep
FBgn0031227	CG3709
FBgn0033473	CG12128
FBgn0005649	Rox8
FBgn0023212	Elongin-B
FBgn0024188	san
FBgn0027499	wde
FBgn0028692	Rpn2
FBgn0031643	CG3008
FBgn0036187	CG11660
FBgn0031003	CG7889
FBgn0030739	CG13957
FBgn0035624	Eaf6
FBgn0051155	Rpb7
FBgn0030946	CG6659
FBgn0035181	CG9205
FBgn0010339	128up
FBgn0001330	kz
FBgn0034488	CG11208
FBgn0037689	CG8135
FBgn0038300	CG4203
FBgn0023169	SNF1A
FBgn0035640	mad2
FBgn0086899	tlk
FBgn0033886	CG13349
FBgn0030735	CG3632
FBgn0028497	CG3530
FBgn0033686	Hen1
FBgn0031768	CG12393
FBgn0016984	sktl
FBgn0033460	sec24
FBgn0031779	CG9175
FBgn0015360	oxt
FBgn0036486	Msh6
FBgn0036838	CG3808
FBgn0010422	TfIIS
FBgn0034367	sec6
FBgn0037660	CG18005
[truncated: 10 more columns]

## Sheet: fly tissue_cell-associated gene
CarcassL3		CarcassMixedMaleFemale+1d		CarcassMixedMaleFemale+4d		CarcassMixedMaleFemale+20d		FatL3		FatPrepupae		FatPrepupae+2d		SalivaryGlandsL3		SalivaryGlandsPrepupae		DigestiveSystemL3		DigestiveSystemMixedMaleFemale+1d		DigestiveSystemMixedMaleFemale+4d		DigestiveSystemMixedMaleFemale+20d		ImaginalDiscsL3		CNSL3		CNSPrepupae+2d		HeadsVirginFemale+1d		HeadsVirginFemale+4d		HeadsVirginFemale+20d		HeadsMatedFemale+1d		HeadsMatedFemale+4d		HeadsMatedFemale+20d		HeadsMatedMale+1d		HeadsMatedMale+4d		HeadsMatedMale+20d
ID	Name	ID	Name	ID	Name	ID	Name	ID	Name	ID	Name	ID	Name	ID	Name	ID	Name	ID	Name	ID	Name	ID	Name	ID	Name	ID	Name	ID	Name	ID	Name	ID	Name	ID	Name	ID	Name	ID	Name	ID	Name	ID	Name	ID	Name	ID	Name	ID	Name
FBgn0041096	rols	FBgn0083228	Frq2	FBgn0040985	CG6115	FBgn0040985	CG6115	FBgn0040507	ACXD	FBgn0040985	CG6115	FBgn0041096	rols	FBgn0260856	membrin	FBgn0260856	membrin	FBgn0013272	Gp150	FBgn0033983	CG10253	FBgn0040507	ACXD	FBgn0040507	ACXD	FBgn0043865	SA-2	FBgn0052227	gogo	FBgn0015754	Lis-1	FBgn0003301	rut	FBgn0030358	CG10362	FBgn0029176	Ef1gamma	FBgn0030358	CG10362	FBgn0030358	CG10362	FBgn0038897	CG5849	FBgn0030358	CG10362	FBgn0030358	CG10362	FBgn0030358	CG10362
FBgn0004227	nonA	FBgn0001250	if	FBgn0015623	Cpr	FBgn0015623	Cpr	FBgn0024945	NitFhit	FBgn0019968	Khc-73	FBgn0040985	CG6115	FBgn0030306	Spase25	FBgn0004657	mys	FBgn0025574	Pli	FBgn0040507	ACXD	FBgn0051343	CG31343	FBgn0037973	CG18547	FBgn0017557	Pros28.1A	FBgn0036534	Dcp2	FBgn0052227	gogo	FBgn0261569	CG42683	FBgn0003301	rut	FBgn0036273	CG10426	FBgn0003301	rut	FBgn0058470	CG40470	FBgn0031855	CG11221	FBgn0003301	rut	FBgn0003301	rut	FBgn0039380	CG5890
FBgn0051121	CG31121	FBgn0015623	Cpr	FBgn0005666	bt	FBgn0034137	CG4945	FBgn0014002	Pdi	FBgn0037973	CG18547	FBgn0037798	CG12817	FBgn0035589	CHMP2B	FBgn0036484	Pex3	FBgn0034068	casp	FBgn0037973	CG18547	FBgn0051233	CG31233	FBgn0051343	CG31343	FBgn0017556	Pros28.1B	FBgn0043884	mask	FBgn0030358	CG10362	FBgn0030897	Frq1	FBgn0261569	CG42683	FBgn0002917	na	FBgn0030897	Frq1	FBgn0004618	gl	FBgn0034605	CG15661	FBgn0261569	CG42683	FBgn0039380	CG5890	FBgn0025726	unc-13
FBgn0031855	CG11221	FBgn0005666	bt	FBgn0034137	CG4945	FBgn0259680	Pkcdelta	FBgn0026315	Ugt35a	FBgn0036697	rogdi	FBgn0051323	CG31323	FBgn0044871	Gos28	FBgn0036534	Dcp2	FBgn0030748	Traf-like	FBgn0051343	CG31343	FBgn0031170	CG1718	FBgn0051233	CG31233	FBgn0036488	CG6878	FBgn0004227	nonA	FBgn0033983	CG10253	FBgn0004618	gl	FBgn0058470	CG40470	FBgn0036992	CG11796	FBgn0004618	gl	FBgn0001991	Ca-alpha1D	FBgn0027070	CG17322	FBgn0083228	Frq2	FBgn0083228	Frq2	FBgn0058470	CG40470
FBgn0032684	CG10178	FBgn0035046	CG3683	FBgn0033570	CG7712	FBgn0032820	fbp	FBgn0086691	UK114	FBgn0051213	CG31213	FBgn0086691	UK114	FBgn0014002	Pdi	FBgn0025574	Pli	FBgn0039402	vps2	FBgn0051233	CG31233	FBgn0053173		FBgn0031170	CG1718	FBgn0033983	CG10253	FBgn0015520	nonA-l	FBgn0003301	rut	FBgn0036992	CG11796	FBgn0004618	gl	FBgn0031855	CG11221	FBgn0033578	BBS4	FBgn0000382	csw	FBgn0025595	GRHR	FBgn0030897	Frq1	FBgn0030897	Frq1	FBgn0261922	PI4KIIIalpha
FBgn0010433	ato	FBgn0250906	Pgk	FBgn0259680	Pkcdelta	FBgn0039213	atl	FBgn0025595	GRHR	FBgn0032713	CG17323	FBgn0038474	mRpS11	FBgn0052099	eap	FBgn0017578	Max	FBgn0035028	Start1	FBgn0031170	CG1718	FBgn0051004	CG31004	FBgn0051534		FBgn0041096	rols	FBgn0019968	Khc-73	FBgn0004227	nonA	FBgn0027074	CG17324	FBgn0031855	CG11221	FBgn0027073	CG4302	FBgn0259146	CG42261	FBgn0037380		FBgn0032820	fbp	FBgn0019968	Khc-73	FBgn0025726	unc-13	FBgn0030961	CG7058
FBgn0002284	Pros26	FBgn0036992	CG11796	FBgn0039742	CG15528	FBgn0001187	Hex-C	FBgn0001125	Got2	FBgn0086691	UK114	FBgn0045759	bin	FBgn0036118	blos2	FBgn0034068	casp	FBgn0051004	CG31004	FBgn0053173		FBgn0051323	CG31323	FBgn0051004	CG31004	FBgn0040509	ACXB	FBgn0003887	betaTub56D	FBgn0261569	CG42683	FBgn0025595	GRHR	FBgn0259680	Pkcdelta	FBgn0034605	CG15661	FBgn0259680	Pkcdelta	FBgn0038295	Gyc88E	FBgn0032001	CG8360	FBgn0025726	unc-13	FBgn0058470	CG40470	FBgn0004618	gl
FBgn0035206	CG9186	FBgn0034137	CG4945	FBgn0032820	fbp	FBgn0032001	CG8360	FBgn0038038	CG5167	FBgn0003371	sgg	FBgn0040900	CG17777	FBgn0037467	CG1104	FBgn0038829	CG17271	FBgn0033541	CG12934	FBgn0051004	CG31004	FBgn0039085	CG10170	FBgn0039085	CG10170	FBgn0040510	ACXA	FBgn0058470	CG40470	FBgn0039380	CG5890	FBgn0261794	kcc	FBgn0001991	Ca-alpha1D	FBgn0027070	CG17322	FBgn0025595	GRHR	FBgn0037847	SelR	FBgn0003308	ry	FBgn0261922	PI4KIIIalpha	FBgn0261922	PI4KIIIalpha	FBgn0033578	BBS4
FBgn0039742	CG15528	FBgn0033570	CG7712	FBgn0011455	l(3)neo18	FBgn0259736	CG42390	FBgn0032820	fbp	FBgn0039648	CG14515	FBgn0038436	Gyc-89Db	FBgn0026250	eIF-1A	FBgn0026319	Traf4	FBgn0040475	SH3PX1	FBgn0039085	CG10170	FBgn0039086	CG16732	FBgn0039086	CG16732	FBgn0040508	ACXC	FBgn0030093	dalao	FBgn0083228	Frq2	FBgn0036926	CG7646	FBgn0000382	csw	FBgn0027074	CG17324	FBgn0261794	kcc	FBgn0053547	Rim	FBgn0050431	CG30431	FBgn0030961	CG7058	FBgn0030961	CG7058	FBgn0036273	CG10426
FBgn0038009	CG17738	FBgn0259680	Pkcdelta	FBgn0001187	Hex-C	FBgn0034877	levy	FBgn0015737	Hmu	FBgn0000568	Eip75B	FBgn0036056	CG6709	FBgn0032727	CG10623	FBgn0029176	Ef1gamma	FBgn0039085	CG10170	FBgn0039086	CG16732	FBgn0039087	CG10168	FBgn0039087	CG10168	FBgn0040506	ACXE	FBgn0032297	CG17124	FBgn0030897	Frq1	FBgn0259243	Pka-R1	FBgn0037380		FBgn0025595	GRHR	FBgn0001991	Ca-alpha1D	FBgn0026439	Eaat1	FBgn0261554	CG42672	FBgn0004618	gl	FBgn0004618	gl	FBgn0259146	CG42261
FBgn0001977	l(2)35Bg	FBgn0039742	CG15528	FBgn0259736	CG42390	FBgn0033520	Prx2540-1	FBgn0032726	CG10621	FBgn0024244	drm	FBgn0039650	Mesh1	FBgn0002573	sens	FBgn0037383	CG2023	FBgn0039086	CG16732	FBgn0039087	CG10168	FBgn0040252	Ugt86Dh	FBgn0040252	Ugt86Dh	FBgn0052301	CG32301	FBgn0051323	CG31323	FBgn0019968	Khc-73	FBgn0000382	csw	FBgn0030581	CG14408	FBgn0038295	Gyc88E	FBgn0036926	CG7646	FBgn0004366	rdgC	FBgn0037163	laza	FBgn0036273	CG10426	FBgn0259146	CG42261	FBgn0032297	CG17124
FBgn0035208	CG9184	FBgn0040900	CG17777	FBgn0034877	levy	FBgn0035471	Sc2	FBgn0037730	CG9444	FBgn0037730	CG9444	FBgn0032726	CG10621	FBgn0038110	CG8031	FBgn0261456	hpo	FBgn0040252	Ugt86Dh	FBgn0040252	Ugt86Dh	FBgn0040250	Ugt86Dj	FBgn0040250	Ugt86Dj	FBgn0052305	CG32305	FBgn0026313	X11L	FBgn0032916	CG9257	FBgn0037380		FBgn0038295	Gyc88E	FBgn0035364		FBgn0259243	Pka-R1	FBgn0002938	ninaC	FBgn0037167	CG11425	FBgn0259146	CG42261	FBgn0002917	na	FBgn0002917	na
FBgn0035522	CG1273	FBgn0037847	SelR	FBgn0035471	Sc2	FBgn0036862	Gbs-76A	FBgn0033465	CG12140	FBgn0029823	CG3011	FBgn0039648	CG14515	FBgn0035944	CG5021	FBgn0028539	CG31731	FBgn0040250	Ugt86Dj	FBgn0040250	Ugt86Dj	FBgn0040253	Ugt86Dg	FBgn0040253	Ugt86Dg	FBgn0015520	nonA-l	FBgn0052677	X11Lbeta	FBgn0025726	unc-13	FBgn0030581	CG14408	FBgn0020368	Vha68-1	FBgn0026439	Eaat1	FBgn0039937	fd102C	FBgn0004242	Syt1	FBgn0000536	eas	FBgn0002917	na	FBgn0039925	Kif3C	FBgn0039925	Kif3C
FBgn0034709	Swim	FBgn0011455	l(3)neo18	FBgn0036862	Gbs-76A	FBgn0036428	CG9238	FBgn0003308	ry	FBgn0050431	CG30431	FBgn0037526	CG10092	FBgn0069242	eca	FBgn0051534		FBgn0026315	Ugt35a	FBgn0040253	Ugt86Dg	FBgn0026315	Ugt35a	FBgn0026315	Ugt35a	FBgn0019968	Khc-73	FBgn0085451	CG34422	FBgn0058470	CG40470	FBgn0038295	Gyc88E	FBgn0037847	SelR	FBgn0032820	fbp	FBgn0000382	csw	FBgn0085385	CG34356	FBgn0036208	CG10361	FBgn0004380	Klp64D	FBgn0004380	Klp64D	FBgn0004380	Klp64D
FBgn0000568	Eip75B	FBgn0034709	Swim	FBgn0036428	CG9238	FBgn0021953	Fatp	FBgn0029823	CG3011	FBgn0051702	CG31702	FBgn0259222	CG42322	FBgn0032449	CG17036	FBgn0032689	CG10413	FBgn0032684	CG10178	FBgn0026315	Ugt35a	FBgn0040257	Ugt86Dc	FBgn0040257	Ugt86Dc	FBgn0052026	CG32026	FBgn0037475	Fer1	FBgn0037798	CG12817	FBgn0020368	Vha68-1	FBgn0035364		FBgn0032726	CG10621	FBgn0037380		FBgn0032726	CG10621	FBgn0037553	CG18249	FBgn0051534		FBgn0031855	CG11221	FBgn0036579	CG5027
FBgn0024244	drm	FBgn0019957	ND42	FBgn0021953	Fatp	FBgn0032945	CG8665	FBgn0031092	CG9577	FBgn0031092	CG9577	FBgn0037730	CG9444	FBgn0040340	TRAM	FBgn0031799	Pez	FBgn0035236	CG12004	FBgn0040257	Ugt86Dc	FBgn0027073	CG4302	FBgn0015663	Dot	FBgn0038269	Rrp6	FBgn0010433	ato	FBgn0030961	CG7058	FBgn0035364		FBgn0053547	Rim	FBgn0038735	CG4662	FBgn0030581	CG14408	FBgn0001187	Hex-C	FBgn0032904	Mtp	FBgn0036992	CG11796	FBgn0052677	X11Lbeta	FBgn0024728	Slip1
FBgn0037240	Cont	FBgn0259736	CG42390	FBgn0053098	CG33098	FBgn0030853	CG5703	FBgn0032945	CG8665	FBgn0034914	CG5554	FBgn0037402	Vha14-2	FBgn0034999	CG3394	FBgn0051716	Cnot4	FBgn0050077	blos1	FBgn0027073	CG4302	FBgn0015663	Dot	FBgn0262511	Vha44	FBgn0036170	CG11714	FBgn0015550	tap	FBgn0085403	Rapgap1	FBgn0053547	Rim	FBgn0004366	rdgC	FBgn0031299	CG4629	FBgn0020368	Vha68-1	FBgn0033252	CG12769	FBgn0027571	CG3523	FBgn0031855	CG11221	FBgn0037475	Fer1	FBgn0036992	CG11796
FBgn0028685	Rpt4	FBgn0034877	levy	FBgn0033633	CG7759	FBgn0032904	Mtp	FBgn0051075	CG31075	FBgn0051075	CG31075	FBgn0035760	CG8607	FBgn0025637	skpA	FBgn0036988	CG5262	FBgn0045759	bin	FBgn0015663	Dot	FBgn0262511	Vha44	FBgn0038038	CG5167	FBgn0036531	CG6244	FBgn0031493	CG3605	FBgn0259146	CG42261	FBgn0026439	Eaat1	FBgn0034656	CG17922	FBgn0001187	Hex-C	FBgn0053547	Rim	FBgn0027608	CG2082	FBgn0000477	DNaseII	FBgn0052677	X11Lbeta	FBgn0261794	kcc	FBgn0031855	CG11221
FBgn0030208	PPP4R2r	FBgn0035471	Sc2	FBgn0030853	CG5703	FBgn0027571	CG3523	FBgn0024841	Pcd	FBgn0031598	CG3338	FBgn0001281	janB	FBgn0015797	Rab6	FBgn0038810	Srp72	FBgn0036988	CG5262	FBgn0262511	Vha44	FBgn0038038	CG5167	FBgn0033226	CG1882	FBgn0029176	Ef1gamma	FBgn0261617	nej	FBgn0064123	stg1	FBgn0004366	rdgC	FBgn0002938	ninaC	FBgn0033465	CG12140	FBgn0034218	CG18467	FBgn0029846		FBgn0001128	Gpdh	FBgn0037475	Fer1	FBgn0035171	CG12502	FBgn0040259	Ugt86Da
FBgn0035553	CG13722	FBgn0036862	Gbs-76A	FBgn0042627	v(2)k05816	FBgn0042627	v(2)k05816	FBgn0035189	CG9119	FBgn0032955	CG2201	FBgn0039527	CG5639	FBgn0036501	CG7272	FBgn0051935	CG31935	FBgn0036059	nudE	FBgn0038038	CG5167	FBgn0045759	bin	FBgn0020367		FBgn0036273	CG10426	FBgn0036926	CG7646	FBgn0002917	na	FBgn0002938	ninaC	FBgn0004242	Syt1	FBgn0032001	CG8360	FBgn0032820	fbp	FBgn0005561	sv	FBgn0027621	Pfrx	FBgn0261794	kcc	FBgn0001991	Ca-alpha1D	FBgn0027073	CG4302
FBgn0030753	rngo	FBgn0021953	Fatp	FBgn0031436	CG3214	FBgn0039697	CG7834	FBgn0063667	CG32335	FBgn0024841	Pcd	FBgn0050263	CG30263	FBgn0261279	lqfR	FBgn0030037	CG12125	FBgn0036118	blos2	FBgn0020367		FBgn0020367		FBgn0259749	mmy	FBgn0051121	CG31121	FBgn0004567	slp2	FBgn0004380	Klp64D	FBgn0034709	Swim	FBgn0024985	CG11448	FBgn0039751	CG1983	FBgn0004366	rdgC	FBgn0053696	CG33696	FBgn0038299	Spn88Eb	FBgn0035171	CG12502	FBgn0036926	CG7646	FBgn0027070	CG17322
FBgn0003206	Ras64B	FBgn0031264	CG11835	FBgn0000409	Cyt-c-p	FBgn0035586	CG10671	FBgn0037553	CG18249	FBgn0037442	CG10277	FBgn0030569	CG9411	FBgn0032470	CG5142	FBgn0260635	th	FBgn0036516	CG7656	FBgn0033873	CG6337	FBgn0260972	alc	FBgn0033873	CG6337	FBgn0036747	CG6052	FBgn0003430	slp1	FBgn0051534		FBgn0004242	Syt1	FBgn0085385	CG34356	FBgn0000346	comt	FBgn0002938	ninaC	FBgn0037163	laza	FBgn0023507	CG3835	FBgn0001991	Ca-alpha1D	FBgn0039937	fd102C	FBgn0027074	CG17324
FBgn0030065	CG12075	FBgn0021967	Pdsw	FBgn0029888	CG3192	FBgn0027621	Pfrx	FBgn0032904	Mtp	FBgn0037553	CG18249	FBgn0031361	CG17652	FBgn0033357	Tom7	FBgn0011708	Syx5	FBgn0260635	th	FBgn0035298	CG1140	FBgn0028491	CG2930	FBgn0260972	alc	FBgn0261998	CG42816	FBgn0039937	fd102C	FBgn0036579	CG5027	FBgn0085385	CG34356	FBgn0031299	CG4629	FBgn0003308	ry	FBgn0034709	Swim	FBgn0037167	CG11425	FBgn0033246	ACC	FBgn0036926	CG7646	FBgn0000382	csw	FBgn0035171	CG12502
FBgn0003295	ru	FBgn0053098	CG33098	FBgn0001128	Gpdh	FBgn0038299	Spn88Eb	FBgn0000477	DNaseII	FBgn0032904	Mtp	FBgn0030071	CG12661	FBgn0037092	M6	FBgn0014009	Rab2	FBgn0014009	Rab2	FBgn0028491	CG2930	FBgn0262512	Vha14-1	FBgn0028491	CG2930	FBgn0051213	CG31213	FBgn0030974	CG7358	FBgn0051323	CG31323	FBgn0259222	CG42322	FBgn0259222	CG42322	FBgn0033520	Prx2540-1	FBgn0004242	Syt1	FBgn0000536	eas	FBgn0036876	CG9451	FBgn0259243	Pka-R1	FBgn0037380		FBgn0001991	Ca-alpha1D
FBgn0000233	btd	FBgn0002773	Mlc2	FBgn0039697	CG7834	FBgn0023507	CG3835	FBgn0023549	Mct1	FBgn0001089	Gal	FBgn0037395	CG10280	FBgn0260862	Vti1	FBgn0038463	CG3534	FBgn0015791	Rab14	FBgn0262512	Vha14-1	FBgn0028665	VhaAC39-1	FBgn0262512	Vha14-1	FBgn0031169	CG1494	FBgn0005658	Ets65A	FBgn0024728	Slip1	FBgn0019957	ND42	FBgn0262483	Rbp	FBgn0033521	CG12896	FBgn0024985	CG11448	FBgn0003091	Pkc53E	FBgn0033880	CG6553	FBgn0039937	fd102C	FBgn0030581	CG14408	FBgn0039937	fd102C
FBgn0028371	jbug	FBgn0033633	CG7759	FBgn0019624	CoVa	FBgn0033246	ACC	FBgn0015808	ScpX	FBgn0033551	CG7222	FBgn0030039	CG12123	FBgn0014029	2013-09-02	FBgn0030521	CtsB1	FBgn0259734	CG42388	FBgn0028665	VhaAC39-1	FBgn0032002	CG8353	FBgn0028665	VhaAC39-1	FBgn0031171	CG1801	FBgn0038435	Gyc-89Da	FBgn0052677	X11Lbeta	FBgn0001187	Hex-C	FBgn0033252	CG12769	FBgn0033518	Prx2540-2	FBgn0259222	CG42322	FBgn0027571	CG3523	FBgn0039938	Sox102F	FBgn0000382	csw	FBgn0038295	Gyc88E	FBgn0000382	csw
FBgn0014141	cher	FBgn0030853	CG5703	FBgn0038072	CG6225	FBgn0040211	hgo	FBgn0030519	CG11151	FBgn0052451	SPoCk	FBgn0030065	CG12075	FBgn0003008	or	FBgn0037467	CG1104	FBgn0033873	CG6337	FBgn0032002	CG8353	FBgn0040384	CG32795	FBgn0032002	CG8353	FBgn0035424	CG11505	FBgn0010333	Rac1	FBgn0037475	Fer1	FBgn0050263	CG30263	FBgn0039751	CG1983	FBgn0050431	CG30431	FBgn0050263	CG30263	FBgn0014396	tim	FBgn0038603	PKD	FBgn0037380		FBgn0020368	Vha68-1	FBgn0030581	CG14408
FBgn0031264	CG11835	FBgn0042627	v(2)k05816	FBgn0035586	CG10671	FBgn0050118	CG30118	FBgn0039697	CG7834	FBgn0033913	CG8468	FBgn0031707	CG14020	FBgn0010812	unc-45	FBgn0003371	sgg	FBgn0034709	Swim	FBgn0040384	CG32795	FBgn0037845	CG14694	FBgn0040384	CG32795	FBgn0039087	CG10168	FBgn0261649	tinc	FBgn0261794	kcc	FBgn0033252	CG12769	FBgn0000346	comt	FBgn0037845	CG14694	FBgn0033252	CG12769	FBgn0016696	Pitslre	FBgn0023179	amon	FBgn0030581	CG14408	FBgn0037847	SelR	FBgn0038295	Gyc88E
FBgn0039113	CG10217	FBgn0031436	CG3214	FBgn0038011	CG4066	FBgn0030239	CG17333	FBgn0038115	CG7966	FBgn0031948	CG7149	FBgn0031264	CG11835	FBgn0036819	dysb	FBgn0026250	eIF-1A	FBgn0030521	CtsB1	FBgn0037845	CG14694	FBgn0034971	CG3209	FBgn0037845	CG14694	FBgn0038886	CG6475	FBgn0036008	CG3408	FBgn0035171	CG12502	FBgn0000346	comt	FBgn0017549	Ric	FBgn0036428	CG9238	FBgn0043070	MESK2	FBgn0041607	asparagine-synthetase	FBgn0032287	CG6415	FBgn0038295	Gyc88E	FBgn0035364		FBgn0020368	Vha68-1
FBgn0024841	Pcd	FBgn0033734	CG8520	FBgn0033246	ACC	FBgn0036876	CG9451	FBgn0029093	cathD	FBgn0035383	CG2107	FBgn0011566	Bzd	FBgn0032799	CG10166	FBgn0010591	Sply	FBgn0010591	Sply	FBgn0037846	CG6574	FBgn0040336	Seipin	FBgn0034971	CG3209	FBgn0042179	CG18869	FBgn0022959	yps	FBgn0001991	Ca-alpha1D	FBgn0038285	CG6974	FBgn0029846		FBgn0010329	Tbh	FBgn0029846		FBgn0026056	Rlip	FBgn0036997	CG5955	FBgn0020368	Vha68-1	FBgn0053547	Rim	FBgn0035364
FBgn0002543	lea	FBgn0017566	ND75	FBgn0040211	hgo	FBgn0039856	CG1774	FBgn0003162	Pu	FBgn0040297	Nhe2	FBgn0034215	CG4802	FBgn0034967	eIF-5A	FBgn0032727	CG10623	FBgn0024244	drm	FBgn0037912	sea	FBgn0026753	Vha13	FBgn0040336	Seipin	FBgn0010433	ato	FBgn0024555	flfl	FBgn0036926	CG7646	FBgn0033520	Prx2540-1	FBgn0005561	sv	FBgn0053696	CG33696	FBgn0005561	sv	FBgn0038912	CG6656	FBgn0027580	CG1516	FBgn0037847	SelR	FBgn0034218	CG18467	FBgn0034218	CG18467
FBgn0086898	dgo	FBgn0000409	Cyt-c-p	FBgn0050118	CG30118	FBgn0032156	CG13124	FBgn0038299	Spn88Eb	FBgn0038115	CG7966	FBgn0024841	Pcd	FBgn0033962	CG10153	FBgn0000448	Hr46	FBgn0033212	CG1399	FBgn0034971	CG3209	FBgn0037166	CG11426	FBgn0026753	Vha13	FBgn0037512	CG2616	FBgn0039186	CG5746	FBgn0003430	slp1	FBgn0033518	Prx2540-2	FBgn0037163	laza	FBgn0032945	CG8665	FBgn0037163	laza	FBgn0033958	CG12858	FBgn0034885	CG4019	FBgn0035364		FBgn0026439	Eaat1	FBgn0026439	Eaat1
FBgn0034264	CG10933	FBgn0029888	CG3192	FBgn0032156	CG13124	FBgn0010352	Nc73EF	FBgn0036030	CG6767	FBgn0086372	lap	FBgn0003016	osp	FBgn0260744	Tango9	FBgn0030114	CG17754	FBgn0028685	Rpt4	FBgn0040336	Seipin	FBgn0038916	dnd	FBgn0037166	CG11426	FBgn0261617	nej	FBgn0026149	BCL7-like	FBgn0039937	fd102C	FBgn0017549	Ric	FBgn0037166	CG11426	FBgn0261554	CG42672	FBgn0002773	Mlc2	FBgn0013334	Sap47	FBgn0051414	CG31414	FBgn0053547	Rim	FBgn0004366	rdgC	FBgn0004366	rdgC
FBgn0035173	CG13907	FBgn0032511	CG9306	FBgn0010352	Nc73EF	FBgn0038956	CG5379	FBgn0036875	CG9449	FBgn0011674	insc	FBgn0033313	Cirl	FBgn0036181	Muc68Ca	FBgn0261108	Atg13	FBgn0039760	CG9682	FBgn0026753	Vha13	FBgn0005664	Cry	FBgn0038916	dnd	FBgn0030768	CG9723	FBgn0034656	CG17922	FBgn0037050	CG10566	FBgn0043070	MESK2	FBgn0003091	Pkc53E	FBgn0037163	laza	FBgn0036208	CG10361	FBgn0028433	Ggamma30A	FBgn0010225	Gel	FBgn0034218	CG18467	FBgn0034656	CG17922	FBgn0034656	CG17922
FBgn0031571	CG3921	FBgn0001128	Gpdh	FBgn0038956	CG5379	FBgn0037607	CG8036	FBgn0023516	Pex5	FBgn0029093	cathD	FBgn0086898	dgo	FBgn0040623	Spase12	FBgn0038110	CG8031	FBgn0032002	CG8353	FBgn0037166	CG11426	FBgn0028872	CG18095	FBgn0005664	Cry	FBgn0036125	CG6279	FBgn0261612	Cng	FBgn0052000	CG32000	FBgn0029846		FBgn0032305	CG6700	FBgn0037166	CG11426	FBgn0034660	lox2	FBgn0033880	CG6553	FBgn0035227	CG12090	FBgn0026439	Eaat1	FBgn0002938	ninaC	FBgn0261612	Cng
FBgn0010590	Prosbeta1	FBgn0053138	CG33138	FBgn0039486	CG6074	FBgn0030718	CG9172	FBgn0045980	niki	FBgn0003162	Pu	FBgn0001089	Gal	FBgn0010348	Arf79F	FBgn0032901	sky	FBgn0026369	Sara	FBgn0038916	dnd	FBgn0001089	Gal	FBgn0037146	CG7470	FBgn0037050	CG10566	FBgn0259697	nvd	FBgn0040900	CG17777	FBgn0037138	P5CDh1	FBgn0027581	CG6191	FBgn0037167	CG11425	FBgn0003091	Pkc53E	FBgn0259099	DCX-EMAP	FBgn0259817	SteXh:CG42398	FBgn0004366	rdgC	FBgn0004242	Syt1	FBgn0015791	Rab14
FBgn0003460	so	FBgn0029723	Proc-R	FBgn0030745	CG4239	FBgn0037544	CG11035	FBgn0039827	CG1544	FBgn0038299	Spn88Eb	FBgn0031026	CG12231	FBgn0045866	bai	FBgn0039857	RpL6	FBgn0031361	CG17652	FBgn0005664	Cry	FBgn0036461	CG10006	FBgn0035189	CG9119	FBgn0035124	ttm2	FBgn0261641	CG42724	FBgn0005658	Ets65A	FBgn0005561	sv	FBgn0016696	Pitslre	FBgn0000536	eas	FBgn0015024	CkIalpha	FBgn0039938	Sox102F	FBgn0038984	CG5315	FBgn0034656	CG17922	FBgn0037541	CG2747	FBgn0002938	ninaC
FBgn0020370	TppII	FBgn0039697	CG7834	FBgn0030718	CG9172	FBgn0027580	CG1516	FBgn0052698	CG32698	FBgn0039844	CG1607	FBgn0010772	Xe7	FBgn0015614	CanB2	FBgn0033199	CG17985	FBgn0033269		FBgn0037146	CG7470	FBgn0035355	CG16985	FBgn0028872	CG18095	FBgn0029752	TrxT	FBgn0085385	CG34356	FBgn0038436	Gyc-89Db	FBgn0037163	laza	FBgn0010772	Xe7	FBgn0036208	CG10361	FBgn0003460	so	FBgn0260963		FBgn0039681	CG7582	FBgn0015791	Rab14	FBgn0003371	sgg	FBgn0038463	CG3534
FBgn0029662	CG12206	FBgn0019624	CoVa	FBgn0034412	abba	FBgn0034885	CG4019	FBgn0050010	CG30010	FBgn0036030	CG6767	FBgn0022740	HLH54F	FBgn0028663	VhaM9.7-b	FBgn0027101	Dyrk3	FBgn0034573	CG3295	FBgn0035189	CG9119	FBgn0035356	CG16986	FBgn0001089	Gal	FBgn0038934	Gld2	FBgn0000568	Eip75B	FBgn0038435	Gyc-89Da	FBgn0037167	CG11425	FBgn0015024	CkIalpha	FBgn0028496	CG30116	FBgn0039054	CG13830	FBgn0023179	amon	FBgn0036934	sNPF-R	FBgn0002938	ninaC	FBgn0024985	CG11448	FBgn0004242	Syt1
FBgn0033667	CG13183	FBgn0038072	CG6225	FBgn0037544	CG11035	FBgn0260747	CG5010	FBgn0038129	CG8449	FBgn0036813	Aut1	FBgn0038830	CG17272	FBgn0015298	Srp19	FBgn0037846	CG6574	FBgn0030694	CG15602	FBgn0028872	CG18095	FBgn0022740	HLH54F	FBgn0036461	CG10006	FBgn0085521	CG40813	FBgn0024308		FBgn0053547	Rim	FBgn0002773	Mlc2	FBgn0003460	so	FBgn0037146	CG7470	FBgn0026056	Rlip	FBgn0016694	Pdp1	FBgn0031116	CG1695	FBgn0034709	Swim	FBgn0085385	CG34356	FBgn0037541	CG2747
FBgn0033668	CG13188	FBgn0035586	CG10671	FBgn0038947	sar1	FBgn0029891	Pink1	FBgn0030679	CG8206	FBgn0030055	CG12772	FBgn0029662	CG12206	FBgn0036768	CG7402	FBgn0032449	CG17036	FBgn0034999	CG3394	FBgn0001089	Gal	FBgn0038830	CG17272	FBgn0027581	CG6191	FBgn0085693	CG41562	FBgn0011764	Dsp1	FBgn0036616	CG4893	FBgn0036208	CG10361	FBgn0039054	CG13830	FBgn0013325	RpL11	FBgn0261955	kdn	FBgn0031999	CG8419	FBgn0037819	CG14688	FBgn0023458	Rbcn-3A	FBgn0038735	CG4662	FBgn0024985	CG11448
FBgn0032467	CG9934	FBgn0261955	kdn	FBgn0004169	up	FBgn0037275	CG14655	FBgn0038603	PKD	FBgn0036581	MED10	FBgn0033668	CG13188	FBgn0028398	Taf10	FBgn0040340	TRAM	FBgn0025637	skpA	FBgn0036461	CG10006	FBgn0052407	CG32407	FBgn0035355	CG16985	FBgn0030524	CG10993	FBgn0027951	MTA1-like	FBgn0261649	tinc	FBgn0005664	Cry	FBgn0027621	Pfrx	FBgn0037553	CG18249	FBgn0038912	CG6656	FBgn0032287	CG6415	FBgn0037714	CG9396	FBgn0004242	Syt1	FBgn0031299	CG4629	FBgn0031304	CG4552
FBgn0020294	ko	FBgn0040211	hgo	FBgn0039358	CG5028	FBgn0000492	Dr	FBgn0052758	CG32758	FBgn0052698	CG32698	FBgn0035960	CG4942	FBgn0026787	Nhe1	FBgn0003345	sd	FBgn0037315	Cerk	FBgn0035355	CG16985	FBgn0035173	CG13907	FBgn0035356	CG16986	FBgn0036056	CG6709	FBgn0261086	Syt14	FBgn0039505	CG5934	FBgn0034660	lox2	FBgn0026056	Rlip	FBgn0032904	Mtp	FBgn0033958	CG12858	FBgn0003068	per	FBgn0042650	disco-r	FBgn0024985	CG11448	FBgn0036984	CG13248	FBgn0085385	CG34356
FBgn0033631	Sod3	FBgn0050118	CG30118	FBgn0029891	Pink1	FBgn0020236	ATPCL	FBgn0032287	CG6415	FBgn0050010	CG30010	FBgn0035422	RpL28	FBgn0050394	CG30394	FBgn0050423	CG30423	FBgn0029911	CG14435	FBgn0035356	CG16986	FBgn0015808	ScpX	FBgn0052485	CG32485	FBgn0003435	sm	FBgn0015949	hrg	FBgn0034218	CG18467	FBgn0003091	Pkc53E	FBgn0050118	CG30118	FBgn0027571	CG3523	FBgn0013334	Sap47	FBgn0036997	CG5955	FBgn0000459	disco	FBgn0085385	CG34356	FBgn0037698	CG16779	FBgn0038735	CG4662
FBgn0036877	CG9452	FBgn0039856	CG1774	FBgn0037275	CG14655	FBgn0016687	Nurf-38	FBgn0027580	CG1516	FBgn0038129	CG8449	FBgn0038299	Spn88Eb	FBgn0033906	CG8331	FBgn0034573	CG3295	FBgn0031450	Hrs	FBgn0052407	CG32407	FBgn0032715	CG17597	FBgn0031571	CG3921	FBgn0011224	heph	FBgn0030208	PPP4R2r	FBgn0051158	Efa6	FBgn0029888	CG3192	FBgn0036876	CG9451	FBgn0000477	DNaseII	FBgn0028433	Ggamma30A	FBgn0027580	CG1516	FBgn0037612	CG8112	FBgn0038735	CG4662	FBgn0259222	CG42322	FBgn0031299	CG4629
FBgn0036875	CG9449	FBgn0028325	l(1)G0334	FBgn0031478	CG8814	FBgn0031478	CG8814	FBgn0052372	ltl	FBgn0004509	Fur1	FBgn0034956	CG4324	FBgn0036756	cln3	FBgn0035285	CG12025	FBgn0016078	wun	FBgn0052485	CG32485	FBgn0030519	CG11151	FBgn0015808	ScpX	FBgn0036008	CG3408	FBgn0014163	fax	FBgn0261641	CG42724	FBgn0001128	Gpdh	FBgn0038912	CG6656	FBgn0035877	CG7083	FBgn0028325	l(1)G0334	FBgn0003380	Sh	FBgn0033065	Cyp6w1	FBgn0031299	CG4629	FBgn0260972	alc	FBgn0036984	CG13248
FBgn0038126	CG8483	FBgn0032156	CG13124	FBgn0039430	CG5455	FBgn0000052	ade2	FBgn0052626	CG32626	FBgn0052758	CG32758	FBgn0028527	CG18507	FBgn0036300	CG10688	FBgn0030694	CG15602	FBgn0038881	CG16791	FBgn0035173	CG13907	FBgn0030731	Mfe2	FBgn0032715	CG17597	FBgn0022959	yps	FBgn0031375	erm	FBgn0004242	Syt1	FBgn0053138	CG33138	FBgn0262477	FoxP	FBgn0032511	CG9306	FBgn0031926	CG6739	FBgn0052372	ltl	FBgn0033697	Cyp6t3	FBgn0036984	CG13248	FBgn0261086	Syt14	FBgn0038816	Lrrk
FBgn0034110	Atg9	FBgn0010352	Nc73EF	FBgn0030087	CG7766	FBgn0259817	SteXh:CG42398	FBgn0010225	Gel	FBgn0036058	CG6707	FBgn0020294	ko	FBgn0029762	NAAT1	FBgn0034999	CG3394	FBgn0037442	CG10277	FBgn0015808	ScpX	FBgn0033494	KCNQ	FBgn0030519	CG11151	FBgn0002673	twe	FBgn0034802	CG3800	FBgn0037541	CG2747	FBgn0029723	Proc-R	FBgn0041707	7B2	FBgn0052485	CG32485	FBgn0039486	CG6074	FBgn0030407	CG2543	FBgn0015038	Cyp9b1	FBgn0037698	CG16779	FBgn0033252	CG12769	FBgn0260972	alc
FBgn0013469	klu	FBgn0033880	CG6553	FBgn0031995	CG8475	FBgn0035815	Snmp2	FBgn0035438	PHGPx	FBgn0024252		FBgn0036813	Aut1	FBgn0027660	blot	FBgn0037315	Cerk	FBgn0028872	CG18095	FBgn0032715	CG17597	FBgn0031069	Pmp70	FBgn0030731	Mfe2	FBgn0035522	CG1273	FBgn0027101	Dyrk3	FBgn0024985	CG11448	FBgn0015024	CkIalpha	FBgn0262562	CG43102	FBgn0001128	Gpdh	FBgn0259099	DCX-EMAP	FBgn0011288	Snap25	FBgn0031689	Cyp28d1	FBgn0038816	Lrrk	FBgn0000346	comt	FBgn0262483	Rbp
FBgn0017397		FBgn0039486	CG6074	FBgn0035815	Snmp2	FBgn0038256	CG7530	FBgn0040064	yip2	FBgn0039882	CG11576	FBgn0039179		FBgn0011232	scat	FBgn0024994	Csat	FBgn0000477	DNaseII	FBgn0030519	CG11151	FBgn0051259	CG31259	FBgn0033494	KCNQ	FBgn0032089	Rcd-1r	FBgn0003415	skd	FBgn0085385	CG34356	FBgn0003460	so	FBgn0010263	Rbp9	FBgn0029723	Proc-R	FBgn0052532	CG32532	FBgn0039430	CG5455	FBgn0030367	Cyp311a1	FBgn0259222	CG42322	FBgn0017549	Ric	FBgn0261086	Syt14
FBgn0031926	CG6739	FBgn0000116	Argk	FBgn0038256	CG7530	FBgn0038984	CG5315	FBgn0025352	Thiolase	FBgn0010225	Gel	FBgn0038126	CG8483	FBgn0004797	mdy	FBgn0020766	Aats-phe	FBgn0036461	CG10006	FBgn0030731	Mfe2	FBgn0023507	CG3835	FBgn0031069	Pmp70	FBgn0031047	Rcd-1	FBgn0262519	Mi-2	FBgn0000568	Eip75B	FBgn0086372	lap	FBgn0013334	Sap47	FBgn0039697	CG7834	FBgn0260963		FBgn0010014	CanB	FBgn0036211	CG5946	FBgn0262483	Rbp	FBgn0043070	MESK2	FBgn0032001	CG8360
FBgn0033188	CG1600	FBgn0030745	CG4239	FBgn0033763	CG8646	FBgn0038876	CG5919	FBgn0260744	Tango9	FBgn0039965	CG13865	FBgn0045980	niki	FBgn0030734	CG9911	FBgn0261554	CG42672	FBgn0027581	CG6191	FBgn0039697	CG7834	FBgn0260960	Baldspot	FBgn0011674	insc	FBgn0039887	CG2053	FBgn0051660	pog	FBgn0000448	Hr46	FBgn0039054	CG13830	FBgn0028433	Ggamma30A	FBgn0027621	Pfrx	FBgn0023179	amon	FBgn0039916	CG9935	FBgn0026576	CG5991	FBgn0019957	ND42	FBgn0027608	CG2082	FBgn0259736	CG42390
FBgn0250843	Pros35	FBgn0030718	CG9172	FBgn0030733	CG3560	FBgn0052984	CG32984	FBgn0026878	CG4325	FBgn0040064	yip2	FBgn0032013	Scgalpha	FBgn0047135	CG32276	FBgn0015797	Rab6	FBgn0038321	CG6218	FBgn0031069	Pmp70	FBgn0261930	vnd	FBgn0051259	CG31259	FBgn0034700	CG11269	FBgn0003295	ru	FBgn0025549	unc-119	FBgn0038072	CG6225	FBgn0035720	CG10077	FBgn0038299	Spn88Eb	FBgn0016694	Pdp1	FBgn0041605	cpx	FBgn0039530	Tusp	FBgn0050263	CG30263	FBgn0029846		FBgn0033252	CG12769
FBgn0001320	kni	FBgn0034412	abba	FBgn0031021	CG12203	FBgn0034484	CG11044	FBgn0030968	CG7322	FBgn0004888	Scsalpha	FBgn0031926	CG6739	FBgn0261361	CG42638	FBgn0035107	mri	FBgn0035877	CG7083	FBgn0051259	CG31259	FBgn0039756	CG9743	FBgn0023507	CG3835	FBgn0039498	CG17991	FBgn0000233	btd	FBgn0040230	dbo	FBgn0033668	CG13188	FBgn0039486	CG6074	FBgn0023507	CG3835	FBgn0001150	gt	FBgn0031294	IA-2	FBgn0032382	Mal-B2	FBgn0033252	CG12769	FBgn0032151	nAcRalpha-30D	FBgn0039751	CG1983
FBgn0003513	ss	FBgn0037544	CG11035	FBgn0052984	CG32984	FBgn0042207	CG18530	FBgn0040918	schlank	FBgn0037978	KLHL18	FBgn0040629	CG18673	FBgn0262516	trpml	FBgn0037442	CG10277	FBgn0022740	HLH54F	FBgn0023507	CG3835	FBgn0250911	CG42245	FBgn0003328	scb	FBgn0028410	Pk34A	FBgn0032651	Oli	FBgn0031299	CG4629	FBgn0003162	Pu	FBgn0001323	knrl	FBgn0033246	ACC	FBgn0031999	CG8419	FBgn0038984	CG5315	FBgn0003965	v	FBgn0039751	CG1983	FBgn0010329	Tbh	FBgn0000346	comt
FBgn0250746	Prosbeta7	FBgn0031228	CG11455	FBgn0034484	CG11044	FBgn0032265	CG18301	FBgn0031824	CG9547	FBgn0260744	Tango9	FBgn0037788	CG3940	FBgn0030658	CG7872	FBgn0033313	Cirl	FBgn0038830	CG17272	FBgn0260960	Baldspot	FBgn0005671	Vha55	FBgn0261930	vnd	FBgn0046332	gskt	FBgn0261988	Gprk2	FBgn0037698	CG16779	FBgn0261955	kdn	FBgn0259099	DCX-EMAP	FBgn0040211	hgo	FBgn0003068	per	FBgn0085347		FBgn0029834	CG5937	FBgn0000346	comt	FBgn0005561	sv	FBgn0003308	ry
FBgn0034412	abba	FBgn0036762	CG7430	FBgn0032265	CG18301	FBgn0004654	Pgd	FBgn0039241	CG11089	FBgn0026878	CG4325	FBgn0001320	kni	FBgn0038312	CG4334	FBgn0051678	CG31678	FBgn0031571	CG3921	FBgn0261930	vnd	FBgn0038613	Vha100-4	FBgn0039756	CG9743	FBgn0031431	CG3515	FBgn0260798	Gprk1	FBgn0038816	Lrrk	FBgn0262477	FoxP	FBgn0036319	Ent3	FBgn0050118	CG30118	FBgn0034693	CG11073	FBgn0033079	Fmo-2	FBgn0005558	ey	FBgn0017549	Ric	FBgn0051660	pog	FBgn0017549	Ric
FBgn0030809	CG9086	FBgn0016120	ATPsyn-d	FBgn0030872	Ucp4A	FBgn0030872	Ucp4A	FBgn0017429	CG5989	FBgn0038197	foxo	FBgn0001323	knrl	FBgn0259144	CG42259	FBgn0039848	lox	FBgn0010590	Prosbeta1	FBgn0261995	CG42813	FBgn0028670	Vha100-2	FBgn0005671	Vha55	FBgn0004832	Xpac	FBgn0037166	CG11426	FBgn0002968	Nrg	FBgn0262562	CG43102	FBgn0260963		FBgn0030239	CG17333	FBgn0053513	Nmdar2	FBgn0030693	CG8974	FBgn0031814	retm	FBgn0043070	MESK2	FBgn0053696	CG33696	FBgn0029846
FBgn0020369	Pros45	FBgn0003071	Pfk	FBgn0037715	CG9399	FBgn0262579	Ect4	FBgn0000052	ade2	FBgn0040349	CG3699	FBgn0000560	eg	FBgn0032401	CG6792	FBgn0001089	Gal	FBgn0030519	CG11151	FBgn0039756	CG9743	FBgn0032373	Vha100-5	FBgn0038613	Vha100-4	FBgn0040230	dbo	FBgn0038881	CG16791	FBgn0259222	CG42322	FBgn0033958	CG12858	FBgn0023179	amon	FBgn0036876	CG9451	FBgn0259109		FBgn0052581	CG32581	FBgn0030558	CG1461	FBgn0027608	CG2082	FBgn0028496	CG30116	FBgn0010329	Tbh
FBgn0039595	AR-2	FBgn0027580	CG1516	FBgn0262579	Ect4	FBgn0051202	CG31202	FBgn0030251	CG2145	FBgn0033812	Pex13	FBgn0038129	CG8449	FBgn0014380	RhoL	FBgn0039189	CG18528	FBgn0261279	lqfR	FBgn0050010	CG30010	FBgn0015222	Fer1HCH	FBgn0028670	Vha100-2	FBgn0011764	Dsp1	FBgn0052226	Pex23	FBgn0262483	Rbp	FBgn0013334	Sap47	FBgn0016694	Pdp1	FBgn0039856	CG1774	FBgn0003380	Sh	FBgn0036934	sNPF-R	FBgn0053296	CG33296	FBgn0029846		FBgn0003091	Pkc53E	FBgn0005561	sv
FBgn0033635	CG7777	FBgn0010612	l(2)06225	FBgn0051202	CG31202	FBgn0039348	Npl4	FBgn0033257	CG8713	FBgn0031412	CG16995	FBgn0039938	Sox102F	FBgn0040208	Kat60	FBgn0027569	cert	FBgn0035499	Chd64	FBgn0005671	Vha55	FBgn0039595	AR-2	FBgn0032373	Vha100-5	FBgn0027539	CG5807	FBgn0001994	crp	FBgn0261086	Syt14	FBgn0028433	Ggamma30A	FBgn0001150	gt	FBgn0041707	7B2	FBgn0052372	ltl	FBgn0030670	Pis	FBgn0031935	CG13793	FBgn0010329	Tbh	FBgn0003093	Pkc98E	FBgn0037744	CG8417
FBgn0043362	bchs	FBgn0004169	up	FBgn0039348	Npl4	FBgn0033065	Cyp6w1	FBgn0016715	Reg-2	FBgn0040918	schlank	FBgn0261624	I-3	FBgn0262468	vib	FBgn0039714	CG7816	FBgn0037592	CG11737	FBgn0038613	Vha100-4	FBgn0031518	CG3277	FBgn0030679	CG8206	FBgn0024244	drm	FBgn0031759	lid	FBgn0030208	PPP4R2r	FBgn0028325	l(1)G0334	FBgn0031999	CG8419	FBgn0010263	Rbp9	FBgn0004169	up	FBgn0029105	alpha-catenin-related	FBgn0031936	CG13794	FBgn0037138	P5CDh1	FBgn0014396	tim	FBgn0051660	pog
FBgn0004169	up	FBgn0039358	CG5028	FBgn0022160	Gpo-1	FBgn0038076	Cyp313a4	FBgn0036816	Indy	FBgn0031824	CG9547	FBgn0051782		FBgn0039099	CG10157	FBgn0038651	CG14299	FBgn0010395	betaInt-nu	FBgn0028670	Vha100-2	FBgn0039052	CG6733	FBgn0015221	Fer2LCH	FBgn0037240	Cont	FBgn0044323	Cka	FBgn0014163	fax	FBgn0031926	CG6739	FBgn0028552	gammaSnap	FBgn0035720	CG10077	FBgn0033911	VGAT	FBgn0034381	List	FBgn0038795	CG4335	FBgn0005561	sv	FBgn0032305	CG6700	FBgn0053696	CG33696
FBgn0052626	CG32626	FBgn0038922	CG6439	FBgn0038076	Cyp313a4	FBgn0040377	Vha36-3	FBgn0031971	CG7224	FBgn0027865	Tsp96F	FBgn0260963		FBgn0019925	Surf4	FBgn0023529	CG2918	FBgn0028527	CG18507	FBgn0032373	Vha100-5	FBgn0039051	CG17109	FBgn0015222	Fer1HCH	FBgn0037402	Vha14-2	FBgn0002543	lea	FBgn0031375	erm	FBgn0039486	CG6074	FBgn0003068	per	FBgn0033880	CG6553	FBgn0037275	CG14655	FBgn0259225	Pde1c	FBgn0260005	wtrw	FBgn0051660	pog	FBgn0016696	Pitslre	FBgn0021953	Fatp
FBgn0017550	Rga	FBgn0037275	CG14655	FBgn0040377	Vha36-3	FBgn0010015	CanA1	FBgn0036337	CG11255	FBgn0039241	CG11089	FBgn0028961	AlstR	FBgn0038855	CG5745	FBgn0002413	dco	FBgn0050392	CG30392	FBgn0065032	Arpc3B	FBgn0039050	CG17110	FBgn0031518	CG3277	FBgn0036224	Rpt4R	FBgn0041097	robo3	FBgn0050263	CG30263	FBgn0023179	amon	FBgn0037754	CG8500	FBgn0051183	CG31183	FBgn0032221	CG5375	FBgn0014859	Hr38	FBgn0031245	CG3625	FBgn0053696	CG33696	FBgn0259822	Ca-beta	FBgn0037166	CG11426
FBgn0028686	Rpt3	FBgn0051719	RluA-1	FBgn0250814	CG4169	FBgn0029158	Las	FBgn0032264	Lip4	FBgn0037623	CG9801	FBgn0039052	CG6733	FBgn0038808	Srp14	FBgn0015024	CkIalpha	FBgn0052373	CG32373	FBgn0030679	CG8206	FBgn0039049	CG6726	FBgn0039052	CG6733	FBgn0039765	mRpS18C	FBgn0005631	robo	FBgn0033252	CG12769	FBgn0031999	CG8419	FBgn0034693	CG11073	FBgn0028671	Vha100-1	FBgn0027654	jdp	FBgn0261090	Sytbeta	FBgn0036359	CG14105	FBgn0021953	Fatp	FBgn0052451	SPoCk	FBgn0000536	eas
FBgn0031421		FBgn0004888	Scsalpha	FBgn0010015	CanA1	FBgn0038412	Zip3	FBgn0017482	T3dh	FBgn0000052	ade2	FBgn0034510	CG13426	FBgn0034061	CG8386	FBgn0250823	gish	FBgn0003328	scb	FBgn0015221	Fer2LCH	FBgn0037818	CG6465	FBgn0039051	CG17109	FBgn0039058	VhaAC39-2	FBgn0033313	Cirl	FBgn0030569	CG9411	FBgn0028552	gammaSnap	FBgn0053513	Nmdar2	FBgn0036511	CG6498	FBgn0051719	RluA-1	FBgn0039911	CG1909	FBgn0023129	aay	FBgn0037163	laza	FBgn0029723	Proc-R	FBgn0036208	CG10361
FBgn0034606	ASPP	FBgn0003360	sesB	FBgn0030758	CanA-14F	FBgn0037265	CG12001	FBgn0037819	CG14688	FBgn0034674	CG9304	FBgn0051475	CG31475	FBgn0015239	Hr78	FBgn0083959	trpm	FBgn0052672	Atg8a	FBgn0015222	Fer1HCH	FBgn0000079	Amy-p	FBgn0039050	CG17110	FBgn0034829	CG9899	FBgn0030806	CG13001	FBgn0017549	Ric	FBgn0037789	CG6208	FBgn0003380	Sh	FBgn0259099	DCX-EMAP	FBgn0033876	synaptogyrin	FBgn0030960	CG7053	FBgn0038877	CG3308	FBgn0028496	CG30116	FBgn0031948	CG7149	FBgn0028496	CG30116
FBgn0020236	ATPCL	FBgn0035032	CG4692	FBgn0038201	Pk1r	FBgn0032382	Mal-B2	FBgn0037801	CG3999	FBgn0023023	CRMP	FBgn0038861	CG7009	FBgn0039068	CG13827	FBgn0032470	CG5142	FBgn0032467	CG9934	FBgn0031518	CG3277	FBgn0000078	Amy-d	FBgn0039049	CG6726	FBgn0029949	CG15035	FBgn0026262	bip2	FBgn0043070	MESK2	FBgn0016120	ATPsyn-d	FBgn0052372	ltl	FBgn0039938	Sox102F	FBgn0034606	ASPP	FBgn0000964	tj	FBgn0013307	Odc1	FBgn0037146	CG7470	FBgn0040297	Nhe2	FBgn0037146	CG7470
FBgn0005626	ple	FBgn0030087	CG7766	FBgn0039909	CG1970	FBgn0032381	Mal-B1	FBgn0039674	CG1907	FBgn0033257	CG8713	FBgn0030407	CG2543	FBgn0039045	CG17119	FBgn0037074	CG7324	FBgn0015789	Rab10	FBgn0039052	CG6733	FBgn0050502	fa2h	FBgn0037818	CG6465	FBgn0014343	mirr	FBgn0032305	CG6700	FBgn0027608	CG2082	FBgn0036997	CG5955	FBgn0032221	CG5375	FBgn0037607	CG8036	FBgn0000037	mAcR-60C	FBgn0037819	CG14688	FBgn0052068	CG32068	FBgn0243486	rdo	FBgn0003460	so	FBgn0035189	CG9119
FBgn0000061	al	FBgn0031995	CG8475	FBgn0031935	CG13793	FBgn0038201	Pk1r	FBgn0039537	CG5590	FBgn0016715	Reg-2	FBgn0260432		FBgn0004687	Mlc-c	FBgn0032723	ssp3	FBgn0031589	CG3714	FBgn0039051	CG17109	FBgn0034883	CG17664	FBgn0000078	Amy-d	FBgn0030071	CG12661	FBgn0010772	Xe7	FBgn0029846		FBgn0034693	CG11073	FBgn0027654	jdp	FBgn0038603	PKD	FBgn0038659	endoA	FBgn0042650	disco-r	FBgn0036698	CG7724	FBgn0034660	lox2	FBgn0086372	lap	FBgn0003091	Pkc53E
FBgn0002306	sas	FBgn0037001	CG6020	FBgn0031936	CG13794	FBgn0038326	CG5044	FBgn0029924	CG4586	FBgn0000721	for	FBgn0002306	sas	FBgn0086674	Tango13	FBgn0033814	CG4670	FBgn0036813	Aut1	FBgn0039050	CG17110	FBgn0051148	CG31148	FBgn0050502	fa2h	FBgn0030395	CG15730	FBgn0050122	CG30122	FBgn0027101	Dyrk3	FBgn0053513	Nmdar2	FBgn0033876	synaptogyrin	FBgn0036319	Ent3	FBgn0026878	CG4325	FBgn0000459	disco	FBgn0036145	CG7607	FBgn0003091	Pkc53E	FBgn0039054	CG13830	FBgn0003093	Pkc98E
FBgn0036985	zye	FBgn0035404	CG12079	FBgn0035329		FBgn0031637	CG2950	FBgn0034756	Cyp6d2	FBgn0042175	CG18858	FBgn0033629	Tsp47F	FBgn0037279	CG1129	FBgn0050392	CG30392	FBgn0034110	Atg9	FBgn0039049	CG6726	FBgn0020912	Ptx1	FBgn0034883	CG17664	FBgn0032291	CG17118	FBgn0026375	RhoGAPp190	FBgn0032151	nAcRalpha-30D	FBgn0010399	Nmdar1	FBgn0034606	ASPP	FBgn0023179	amon	FBgn0011288	Snap25	FBgn0053147	Hs3st-A	FBgn0067783	att-ORFA	FBgn0003093	Pkc98E	FBgn0034691	synj	FBgn0014396	tim
FBgn0053196	dp	FBgn0037796	CG12814	FBgn0035817	CG7409	FBgn0031935	CG13793	FBgn0025454	Cyp6g1	FBgn0051683	CG31683	FBgn0034627	EfSec	FBgn0035372	CG12093	FBgn0052373	CG32373	FBgn0032373	Vha100-5	FBgn0037818	CG6465	FBgn0035588	CG10672	FBgn0039882	CG11576	FBgn0000147	aur	FBgn0031118	RhoGAP19D	FBgn0086778	gfA	FBgn0004169	up	FBgn0000037	mAcR-60C	FBgn0031999	CG8419	FBgn0030997	CG7990	FBgn0035649	CG10483	FBgn0003748	Treh	FBgn0014396	tim	FBgn0027621	Pfrx	FBgn0000477	DNaseII
FBgn0031298	Atg4	FBgn0262559	Mdh2	FBgn0035982	CG4461	FBgn0031936	CG13794	FBgn0015038	Cyp9b1	FBgn0014001	Pak	FBgn0051860	CG31860	FBgn0086706	pix	FBgn0052672	Atg8a	FBgn0065032	Arpc3B	FBgn0000079	Amy-p	FBgn0037354	CG12171	FBgn0051148	CG31148	FBgn0051703	CG31703	FBgn0032821	CdGAPr	FBgn0010329	Tbh	FBgn0039358	CG5028	FBgn0038659	endoA	FBgn0032287	CG6415	FBgn0003360	sesB	FBgn0036043	CG8177	FBgn0032507	CG9377	FBgn0031436	CG3214	FBgn0038853	RhoGAP93B	FBgn0032305	CG6700
FBgn0001235	hth	FBgn0033763	CG8646	FBgn0032181	CG13133	FBgn0035329		FBgn0015039	Cyp9b2	FBgn0028646	aralar1	FBgn0037613	Cks85A	FBgn0015794	Rab-RP4	FBgn0000032	Acph-1	FBgn0026619	Taz	FBgn0000078	Amy-d	FBgn0053265	Muc68E	FBgn0033502	CG12910	FBgn0051702	CG31702	FBgn0030674	CG8184	FBgn0260660	mp	FBgn0032221	CG5375	FBgn0034433	endoB	FBgn0036997	CG5955	FBgn0020372	TM4SF	FBgn0026576	CG5991	FBgn0033321	CG8738	FBgn0032305	CG6700	FBgn0026056	Rlip	FBgn0027581	CG6191
FBgn0261953	AP-2	FBgn0022709	Adk1	FBgn0036359	CG14105	FBgn0035982	CG4461	FBgn0033775	Cyp9h1	FBgn0260743	CG18347	FBgn0025642	CG32812	FBgn0261914		FBgn0032210	CYLD	FBgn0030699	CG8578	FBgn0050502	fa2h	FBgn0033812	Pex13	FBgn0040383	CG5254	FBgn0040356	CG12498	FBgn0259100		FBgn0051660	pog	FBgn0027654	jdp	FBgn0011288	Snap25	FBgn0027580	CG1516	FBgn0027491	Cdk5alpha	FBgn0085410	TrissinR	FBgn0037627	CG13318	FBgn0027581	CG6191	FBgn0050118	CG30118	FBgn0038321	CG6218
FBgn0001075	ft	FBgn0030733	CG3560	FBgn0023129	aay	FBgn0032181	CG13133	FBgn0031689	Cyp28d1	FBgn0036816	Indy	FBgn0261673	nemy	FBgn0039249	CG11168	FBgn0037092	M6	FBgn0015221	Fer2LCH	FBgn0034883	CG17664	FBgn0037102	CG7172	FBgn0020912	Ptx1	FBgn0040078	pont	FBgn0015721	king-tubby	FBgn0003295	ru	FBgn0051719	RluA-1	FBgn0030997	CG7990	FBgn0021847	l(2)k14710	FBgn0003423	slgA	FBgn0031770	CG13995	FBgn0038662	CG14290	FBgn0029888	CG3192	FBgn0038912	CG6656	FBgn0016696	Pitslre
FBgn0000497	ds	FBgn0031021	CG12203	FBgn0032673	CG7180	FBgn0259140	CG42255	FBgn0031432	Cyp309a1	FBgn0034943	Fmo-1	FBgn0035192	CG9194	FBgn0038053	CG18549	FBgn0015834	Trip1	FBgn0015222	Fer1HCH	FBgn0039882	CG11576	FBgn0039154	Npc2f	FBgn0035588	CG10672	FBgn0038585	CG7993	FBgn0026411	Lim1	FBgn0032651	Oli	FBgn0033876	synaptogyrin	FBgn0086784	stmA	FBgn0019936	RpS20	FBgn0050054	CG30054	FBgn0004919	gol	FBgn0034440	CG10073	FBgn0259822	Ca-beta	FBgn0262477	FoxP	FBgn0010772	Xe7
FBgn0261396	Rpn3	FBgn0052984	CG32984	FBgn0014028	SdhB	FBgn0023129	aay	FBgn0016126	CaMKI	FBgn0031465	CG3123	FBgn0039681	CG7582	FBgn0000567	Eip74EF	FBgn0261274	Ero1L	FBgn0250746	Prosbeta7	FBgn0051148	CG31148	FBgn0032074	Tsp29Fa	FBgn0037354	CG12171	FBgn0035970	CG4483	FBgn0011674	insc	FBgn0031264	CG11835	FBgn0037546	CG7918	FBgn0020372	TM4SF	FBgn0034885	CG4019	FBgn0004435	Galpha49B	FBgn0029834	CG5937	FBgn0031765	CG9109	FBgn0052451	SPoCk	FBgn0041707	7B2	FBgn0052451	SPoCk
FBgn0261509	haf	FBgn0034645	CG10320	FBgn0004117	Tm2	FBgn0038877	CG3308	FBgn0038412	Zip3	FBgn0261395	Prosalpha3T	FBgn0031530	pgant2	FBgn0039172	Spase22-23	FBgn0017397		FBgn0011202	dia	FBgn0033502	CG12910	FBgn0032075	Tsp29Fb	FBgn0040349	CG3699	FBgn0034650	NC2alpha	FBgn0000212	brm	FBgn0261988	Gprk2	FBgn0004888	Scsalpha	FBgn0027491	Cdk5alpha	FBgn0051414	CG31414	FBgn0027589	CG1688	FBgn0031814	retm	FBgn0035293	CG5687	FBgn0052485	CG32485	FBgn0024187	syd	FBgn0052407	CG32407
FBgn0037796	CG12814	FBgn0034484	CG11044	FBgn0259678	sqa	FBgn0032673	CG7180	FBgn0038467	CG3590	FBgn0001142	Gs1	FBgn0028398	Taf10	FBgn0023423	slmb	FBgn0260862	Vti1	FBgn0030756	CG9903	FBgn0031987	CG12375	FBgn0028516	ZnT35C	FBgn0053265	Muc68E	FBgn0031707	CG14020	FBgn0029903	pod1	FBgn0260798	Gprk1	FBgn0038659	endoA	FBgn0010014	CanB	FBgn0029891	Pink1	FBgn0035192	CG9194	FBgn0030558	CG1461	FBgn0031860	CG11236	FBgn0029723	Proc-R	FBgn0262562	CG43102	FBgn0052485	CG32485
FBgn0005677	dac	FBgn0032265	CG18301	FBgn0034497	CG9090	FBgn0014028	SdhB	FBgn0050359	Mal-A5	FBgn0036337	CG11255	FBgn0031357	mRpL48	FBgn0035622	CG10590	FBgn0038956	CG5379	FBgn0028552	gammaSnap	FBgn0040383	CG5254	FBgn0028663	VhaM9.7-b	FBgn0033812	Pex13	FBgn0050194	CG30194	FBgn0034795	MED23	FBgn0038881	CG16791	FBgn0034433	endoB	FBgn0035521	VhaM9.7-a	FBgn0010225	Gel	FBgn0037796	CG12814	FBgn0053296	CG33296	FBgn0051052		FBgn0031948	CG7149	FBgn0010263	Rbp9	FBgn0053138	CG33138
FBgn0052191	CG32191	FBgn0011211	blw	FBgn0031066	CoVIb	FBgn0013307	Odc1	FBgn0039152	Rootletin	FBgn0032264	Lip4	FBgn0050147	Hil	FBgn0031717	Oscillin	FBgn0051183	CG31183	FBgn0020369	Pros45	FBgn0023537	CG17896	FBgn0035192	CG9194	FBgn0039154	Npc2f	FBgn0036221	CG11588	FBgn0032600	CG17912	FBgn0051721	Trim9	FBgn0011288	Snap25	FBgn0003423	slgA	FBgn0083962	CG34126	FBgn0041605	cpx	FBgn0260005	wtrw	FBgn0036663	CG9674	FBgn0032796	CG10188	FBgn0033958	CG12858	FBgn0029723	Proc-R
FBgn0033763	CG8646	FBgn0037819	CG14688	FBgn0037637	CG9836	FBgn0037637	CG9836	FBgn0033466	Pal1	FBgn0033708	CG8850	FBgn0034943	Fmo-1	FBgn0031468	CG2975	FBgn0040324	Ephrin	FBgn0039595	AR-2	FBgn0020912	Ptx1	FBgn0001248	Idh	FBgn0032074	Tsp29Fa	FBgn0026174	skpD	FBgn0034880	alphaPS5	FBgn0005664	Cry	FBgn0033031	CG8245	FBgn0004435	Galpha49B	FBgn0000492	Dr	FBgn0260004	Snmp1	FBgn0020907	Scp2	FBgn0020385	pug	FBgn0015024	CkIalpha	FBgn0013334	Sap47	FBgn0031948	CG7149
FBgn0037213	CG12581	FBgn0010213	Sod2	FBgn0032833	CoIV	FBgn0067783	att-ORFA	FBgn0261671	tweek	FBgn0037801	CG3999	FBgn0085337	CG34308	FBgn0031466	CG3119	FBgn0003008	or	FBgn0031518	CG3277	FBgn0035588	CG10672	FBgn0025709	CG8083	FBgn0032075	Tsp29Fb	FBgn0026175	skpC	FBgn0035106	rno	FBgn0001994	crp	FBgn0053196	dp	FBgn0027589	CG1688	FBgn0030407	CG2543	FBgn0031294	IA-2	FBgn0023129	aay	FBgn0036262	CG6910	FBgn0040297	Nhe2	FBgn0028433	Ggamma30A	FBgn0083959	trpm
FBgn0034903	CG9850	FBgn0030872	Ucp4A	FBgn0021906	RFeSP	FBgn0021906	RFeSP	FBgn0040285	Scamp	FBgn0039061	Ir	FBgn0037408	NPFR1	FBgn0030029	CG15343	FBgn0035909	ergic53	FBgn0035540	Syx17	FBgn0037354	CG12171	FBgn0035815	Snmp2	FBgn0028516	ZnT35C	FBgn0031074	skpE	FBgn0086675	fne	FBgn0028496	CG30116	FBgn0030997	CG7990	FBgn0039916	CG9935	FBgn0033413	prel	FBgn0031414	eys	FBgn0028879	CG15270	FBgn0026403	Ndg	FBgn0003460	so	FBgn0259110	mmd	FBgn0027621	Pfrx
FBgn0038366	CG4576	FBgn0037715	CG9399	FBgn0032497	CG6043	FBgn0032497	CG6043	FBgn0036821	CG3961	FBgn0029924	CG4586	FBgn0008646	E5	FBgn0261986	RASSF8	FBgn0039160	CG5510	FBgn0036058	CG6707	FBgn0040349	CG3699	FBgn0052191	CG32191	FBgn0028663	VhaM9.7-b	FBgn0003295	ru	FBgn0260400	elav	FBgn0044323	Cka	FBgn0003360	sesB	FBgn0041605	cpx	FBgn0020236	ATPCL	FBgn0085347		FBgn0026409	Mpcp	FBgn0013949	Ela	FBgn0086372	lap	FBgn0035720	CG10077	FBgn0038853	RhoGAP93B
FBgn0002787	Mov34	FBgn0262579	Ect4	FBgn0001091	Gapdh1	FBgn0033321	CG8738	FBgn0037684	CG8129	FBgn0031384	CG4238	FBgn0051211	CG31211	FBgn0025684	MFS18	FBgn0023083	fray	FBgn0024252		FBgn0033812	Pex13	FBgn0032187	CG4839	FBgn0001248	Idh	FBgn0031132	CG15450	FBgn0011817	nmo	FBgn0003016	osp	FBgn0086784	stmA	FBgn0031294	IA-2	FBgn0031285	CG3662	FBgn0024941	RSG7	FBgn0036145	CG7607	FBgn0260753	Pdfr	FBgn0039054	CG13830	FBgn0033880	CG6553	FBgn0033246	ACC
FBgn0037835	CG14687	FBgn0051202	CG31202	FBgn0052311	zormin	FBgn0037627	CG13318	FBgn0061356	CG18003	FBgn0034756	Cyp6d2	FBgn0051713	Apf	FBgn0038799	CG4288	FBgn0010812	unc-45	FBgn0038686	CG5555	FBgn0039154	Npc2f	FBgn0000442	Pkg21D	FBgn0025709	CG8083	FBgn0021760	chb	FBgn0013469	klu	FBgn0243486	rdo	FBgn0036927	CG7433	FBgn0038984	CG5315	FBgn0031298	Atg4	FBgn0259927	CG42450	FBgn0030707	CG8916	FBgn0024957	Irp-1B	FBgn0034691	synj	FBgn0250911	CG42245	FBgn0040211	hgo
FBgn0028695	Rpn1	FBgn0039348	Npl4	FBgn0037627	CG13318	FBgn0038450	CG17560	FBgn0001098	Gdh	FBgn0033775	Cyp9h1	FBgn0034484	CG11044	FBgn0010747	Srp54k	FBgn0034095	CG15701	FBgn0020506	Amyrel	FBgn0032074	Tsp29Fa	FBgn0039840	CG11340	FBgn0035815	Snmp2	FBgn0000233	btd	FBgn0035720	CG10077	FBgn0041097	robo3	FBgn0020372	TM4SF	FBgn0039681	CG7582	FBgn0035227	CG12090	FBgn0033558	CG12344	FBgn0003748	Treh	FBgn0031837	CG11320	FBgn0038072	CG6225	FBgn0036511	CG6498	FBgn0050118	CG30118
FBgn0000576	ems	FBgn0022160	Gpo-1	FBgn0031735	CG11029	FBgn0038449	CG17562	FBgn0013308	Odc2	FBgn0031432	Cyp309a1	FBgn0030313	CG11697	FBgn0031992	CG8498	FBgn0030809	CG9086	FBgn0028693	Rpn12	FBgn0032075	Tsp29Fb	FBgn0036727	CG7589	FBgn0052191	CG32191	FBgn0037164	CG11438	FBgn0029979	CG10777	FBgn0005631	robo	FBgn0027491	Cdk5alpha	FBgn0085347		FBgn0035521	VhaM9.7-a	FBgn0086913	Rab26	FBgn0010350	CdsA	FBgn0031627	CG15630	FBgn0038853	RhoGAP93B	FBgn0259099	DCX-EMAP	FBgn0036876	CG9451
FBgn0008646	E5	FBgn0039830	CG1746	FBgn0001216	Hsc70-1	FBgn0032055	CG13091	FBgn0067783	att-ORFA	FBgn0047135	CG32276	FBgn0038070	CG6753	FBgn0259685	crb	FBgn0027844	CAH1	FBgn0034884	CG17662	FBgn0028516	ZnT35C	FBgn0033079	Fmo-2	FBgn0032187	CG4839	FBgn0053098	CG33098	FBgn0025571	SF1	FBgn0033313	Cirl	FBgn0010014	CanB	FBgn0032800	CG10137	FBgn0031995	CG8475	FBgn0038809	CG16953	FBgn0035538	DopEcR	FBgn0036824	CG3902	FBgn0026056	Rlip	FBgn0058178	CG40178	FBgn0038912	CG6656
FBgn0085256	CG34227	FBgn0038076	Cyp313a4	FBgn0038450	CG17560	FBgn0038033	CG10097	FBgn0034117	CG7997	FBgn0003996	w	FBgn0027538	beta4GalNAcTA	FBgn0036820	CG6852	FBgn0025806	Rap2l	FBgn0051148	CG31148	FBgn0028663	VhaM9.7-b	FBgn0038134	wntD	FBgn0039840	CG11340	FBgn0039113	CG10217	FBgn0025740	plexB	FBgn0030806	CG13001	FBgn0003423	slgA	FBgn0027575	GABA-B-R2	FBgn0004573	5-HT7	FBgn0037835	CG14687	FBgn0033464	CG1441	FBgn0000120	Arr1	FBgn0050118	CG30118	FBgn0260943	Rbp6	FBgn0262477	FoxP
FBgn0261394	Pros29	FBgn0030369	Cyp318a1	FBgn0038449	CG17562	FBgn0038032	CG10096	FBgn0034688	CG11474	FBgn0014427	CG11899	FBgn0032791	CG18094	FBgn0034025	GalNAc-T1	FBgn0004636	R	FBgn0052626	CG32626	FBgn0261673	nemy	FBgn0053181	CG33181	FBgn0036727	CG7589	FBgn0038915	CG17819	FBgn0038956	CG5379	FBgn0003091	Pkc53E	FBgn0004435	Galpha49B	FBgn0024941	RSG7	FBgn0259817	SteXh:CG42398	FBgn0001145	Gs2	FBgn0038641	CG7708	FBgn0000121	Arr2	FBgn0033631	Sod3	FBgn0052532	CG32532	FBgn0041707	7B2
FBgn0038070	CG6753	FBgn0040377	Vha36-3	FBgn0032055	CG13091	FBgn0039131	CG12268	FBgn0032639	CG18563	FBgn0052105	CG32105	FBgn0033735	CG8525	FBgn0050463	CG30463	FBgn0036058	CG6707	FBgn0038852	CG7056	FBgn0035192	CG9194	FBgn0052984	CG32984	FBgn0033079	Fmo-2	FBgn0040355	CG3526	FBgn0029962	CG1402	FBgn0003093	Pkc98E	FBgn0035192	CG9194	FBgn0086913	Rab26	FBgn0038256	CG7530	FBgn0013948		FBgn0031860	CG11236	FBgn0025391	Scgdelta	FBgn0038912	CG6656	FBgn0038603	PKD	FBgn0024187	syd
FBgn0003209	raw	FBgn0250814	CG4169	FBgn0038033	CG10097	FBgn0043792	CG30427	FBgn0031471	CG3117	FBgn0034997	CG3376	FBgn0037758	CG9467	FBgn0037624	CG8223	FBgn0031458	aph-1	FBgn0039492	CG6051	FBgn0001248	Idh	FBgn0039591	CG9988	FBgn0038134	wntD	FBgn0051642	CG31642	FBgn0040324	Ephrin	FBgn0026262	bip2	FBgn0039927	CG11155	FBgn0038809	CG16953	FBgn0038984	CG5315	FBgn0259225	Pde1c	FBgn0041194	Prat2	FBgn0029768	SPR	FBgn0039854	CG1635	FBgn0036319	Ent3	FBgn0262562	CG43102
FBgn0028886	CG15279	FBgn0040793	CG7630	FBgn0039131	CG12268	FBgn0029821	CG4020	FBgn0035496	CG14990	FBgn0039852	nyo	FBgn0041337	Cyp309a2	FBgn0037440	CG1041	FBgn0024252		FBgn0035347	CG33232	FBgn0025709	CG8083	FBgn0035265	CG18173	FBgn0053181	CG33181	FBgn0038649	CG7718	FBgn0033791	Drl-2	FBgn0010772	Xe7	FBgn0039916	CG9935	FBgn0000557	Ef1alpha100E	FBgn0052191	CG32191	FBgn0028400	Syt4	FBgn0026403	Ndg	FBgn0039737	CG7920	FBgn0262477	FoxP	FBgn0260963		FBgn0010263	Rbp9
FBgn0028691	Rpn9	FBgn0010015	CanA1	FBgn0043792	CG30427	FBgn0023550	CG18031	FBgn0033320	CG8586	FBgn0016126	CaMKI	FBgn0032822	CG10466	FBgn0261020	wol	FBgn0020443	Elf	FBgn0028686	Rpt3	FBgn0035815	Snmp2	FBgn0031533	CG2772	FBgn0038832	CG15695	FBgn0035935	mfr	FBgn0025790	TBPH	FBgn0259822	Ca-beta	FBgn0037796	CG12814	FBgn0037835	CG14687	FBgn0039681	CG7582	FBgn0030960	CG7053	FBgn0013949	Ela	FBgn0025592	Gyk	FBgn0041707	7B2	FBgn0023179	amon	FBgn0033958	CG12858
FBgn0036761	MED19	FBgn0003074	Pgi	FBgn0029821	CG4020	FBgn0035293	CG5687	FBgn0032213	CG5390	FBgn0015286	Rala	FBgn0260855	Sec22	FBgn0050344	CG30344	FBgn0034967	eIF-5A	FBgn0032216	CG5384	FBgn0032187	CG4839	FBgn0036996	mag	FBgn0035265	CG18173	FBgn0086916	snky	FBgn0260943	Rbp6	FBgn0026375	RhoGAPp190	FBgn0041605	cpx	FBgn0030693	CG8974	FBgn0051145	CG31145	FBgn0027279	l(1)G0196	FBgn0260753	Pdfr	FBgn0036759	CG5577	FBgn0024187	syd	FBgn0016694	Pdp1	FBgn0028433	Ggamma30A
FBgn0015283	Pros54	FBgn0037265	CG12001	FBgn0023550	CG18031	FBgn0023441	fus	FBgn0032729	CG10639	FBgn0038467	CG3590	FBgn0013751	Awh	FBgn0030576	CG15890	FBgn0030996	CG14194	FBgn0003744	trc	FBgn0000442	Pkg21D	FBgn0051091	CG31091	FBgn0031533	CG2772	FBgn0052320	CG32320	FBgn0011666	msi	FBgn0259100		FBgn0031414	eys	FBgn0052581	CG32581	FBgn0000099	ap	FBgn0002921	Atpalpha	FBgn0000120	Arr1	FBgn0032879	CG9317	FBgn0262562	CG43102	FBgn0001150	gt	FBgn0035720	CG10077
FBgn0042650	disco-r	FBgn0032381	Mal-B1	FBgn0035293	CG5687	FBgn0029804	CG3097	FBgn0039094	CG10184	FBgn0036566	ClC-c	FBgn0036274	CG4328	FBgn0003660	Syb	FBgn0019936	RpS20	FBgn0031285	CG3662	FBgn0039840	CG11340	FBgn0033999	CG8093	FBgn0036996	mag	FBgn0243486	rdo	FBgn0001215	Hrb98DE	FBgn0026411	Lim1	FBgn0262559	Mdh2	FBgn0037408	NPFR1	FBgn0032800	CG10137	FBgn0039830	CG1746	FBgn0000121	Arr2	FBgn0261862	whd	FBgn0010263	Rbp9	FBgn0031999	CG8419	FBgn0033880	CG6553
FBgn0037601	Cyp313b1	FBgn0038201	Pk1r	FBgn0023441	fus	FBgn0023540	CG3630	FBgn0000567	Eip74EF	FBgn0034400	CG15099	FBgn0027341	Gfat1	FBgn0051496	CG31496	FBgn0043362	bchs	FBgn0024814	Clc	FBgn0036727	CG7589	FBgn0031143	CG1532	FBgn0033999	CG8093	FBgn0002543	lea	FBgn0052532	CG32532	FBgn0086372	lap	FBgn0039681	CG7582	FBgn0030670	Pis	FBgn0028646	aralar1	FBgn0086348	se	FBgn0087012	5-HT2	FBgn0033985	CG10257	FBgn0033958	CG12858	FBgn0028552	gammaSnap	FBgn0028671	Vha100-1
FBgn0010015	CanA1	FBgn0011361	mtacp1	FBgn0031359	CG18317	FBgn0051052		FBgn0036732	Oatp74D	FBgn0050359	Mal-A5	FBgn0039851	mey	FBgn0040660	CG13551	FBgn0085421	Epac	FBgn0020912	Ptx1	FBgn0033079	Fmo-2	FBgn0036756	cln3	FBgn0036756	cln3	FBgn0030806	CG13001	FBgn0020309	crol	FBgn0051559	CG31559	FBgn0085347		FBgn0051211	CG31211	FBgn0016650	Lgr1	FBgn0015038	Cyp9b1	FBgn0037646	CAHbeta	FBgn0085520	CG40801	FBgn0013334	Sap47	FBgn0037789	CG6208	FBgn0036511	CG6498
FBgn0027341	Gfat1	FBgn0039909	CG1970	FBgn0023540	CG3630	FBgn0033274	CG14757	FBgn0005278	Sam-S	FBgn0003965	v	FBgn0039852	nyo	FBgn0030443	CG12715	FBgn0039492	CG6051	FBgn0053265	Muc68E	FBgn0038134	wntD	FBgn0033443	CG1698	FBgn0033443	CG1698	FBgn0031715	tomb	FBgn0025641	DAAM	FBgn0039054	CG13830	FBgn0032083	CG9541	FBgn0052506	CG32506	FBgn0259927	CG42450	FBgn0003656	sws	FBgn0035266	Gk	FBgn0034387	Cyp12b2	FBgn0028433	Ggamma30A	FBgn0003068	per	FBgn0259099	DCX-EMAP
FBgn0001987	Gli	FBgn0041181	TepIII	FBgn0085426	Rgk3	FBgn0036262	CG6910	FBgn0020385	pug	FBgn0000308	chic	FBgn0039704	neo	FBgn0051717	CG31717	FBgn0017550	Rga	FBgn0031298	Atg4	FBgn0039591	CG9988	FBgn0028886	CG15279	FBgn0028886	CG15279	FBgn0086442	mib2	FBgn0010300	brat	FBgn0033668	CG13188	FBgn0000273	Pka-C1	FBgn0051871	CG31871	FBgn0028703	Nhe3	FBgn0085410	TrissinR	FBgn0001263	inaD	FBgn0039817	CG15553	FBgn0259110	mmd	FBgn0037754	CG8500	FBgn0039938	Sox102F
FBgn0039852	nyo	FBgn0038271	CG3731	FBgn0031860	CG11236	FBgn0013949	Ela	FBgn0036262	CG6910	FBgn0039152	Rootletin	FBgn0016047	nompA	FBgn0035995	CG3529	FBgn0033962	CG10153	FBgn0031478	CG8814	FBgn0035265	CG18173	FBgn0029762	NAAT1	FBgn0029762	NAAT1	FBgn0086898	dgo	FBgn0035016	CG4612	FBgn0029903	pod1	FBgn0024941	RSG7	FBgn0034381	List	FBgn0032845	CG10747	FBgn0031770	CG13995	FBgn0032879	CG9317	FBgn0051321	CG31321	FBgn0035720	CG10077	FBgn0036997	CG5955	FBgn0030679	CG8206
FBgn0039704	neo	FBgn0031935	CG13793	FBgn0038397	CG10185	FBgn0085425	CG34396	FBgn0030029	CG15343	FBgn0033466	Pal1	FBgn0038412	Zip3	FBgn0029709	CHOp24	FBgn0035347	CG33232	FBgn0031412	CG16995	FBgn0036996	mag	FBgn0039061	Ir	FBgn0050115	GEFmeso	FBgn0052507	CG32507	FBgn0023509	mip130	FBgn0004698	mus210	FBgn0259927	CG42450	FBgn0259225	Pde1c	FBgn0036816	Indy	FBgn0036680	Cpr73D	FBgn0030607	dob	FBgn0036836	CG11619	FBgn0031926	CG6739	FBgn0010399	Nmdar1	FBgn0259179	CG42284
FBgn0000308	chic	FBgn0260479	CG31904	FBgn0016691	Oscp	FBgn0035144	CG17181	FBgn0041194	Prat2	FBgn0034071	CG8405	FBgn0259144	CG42259	FBgn0030341	p24-1	FBgn0000492	Dr	FBgn0031381	Npc2a	FBgn0051091	CG31091	FBgn0039081	Irk2	FBgn0039061	Ir	FBgn0031026	CG12231	FBgn0004875	enc	FBgn0020294	ko	FBgn0033558	CG12344	FBgn0028400	Syt4	FBgn0030693	CG8974	FBgn0004919	gol	FBgn0036836	CG11619	FBgn0038818	Nep4	FBgn0036511	CG6498	FBgn0259109		FBgn0038603	PKD
FBgn0027108	inx2	FBgn0037873	SdhC	FBgn0085425	CG34396	FBgn0024957	Irp-1B	FBgn0039849	CG11334	FBgn0035348	CG16758	FBgn0034391	CG15080	FBgn0043364	cbt	FBgn0034913	usnp	FBgn0039154	Npc2f	FBgn0033999	CG8093	FBgn0032706	Irk3	FBgn0039081	Irk2	FBgn0035489		FBgn0053513	Nmdar2	FBgn0262477	FoxP	FBgn0030670	Pis	FBgn0039911	CG1909	FBgn0052581	CG32581	FBgn0033054	CG14591	FBgn0259985	Mppe	FBgn0259985	Mppe	FBgn0259099	DCX-EMAP	FBgn0003380	Sh	FBgn0036319	Ent3
FBgn0028373	inx3	FBgn0035329		FBgn0035144	CG17181	FBgn0031837	CG11320	FBgn0013949	Ela	FBgn0031939	CG13796	FBgn0014380	RhoL	FBgn0030351	CG1840	FBgn0260934	par-1	FBgn0032074	Tsp29Fa	FBgn0031143	CG1532	FBgn0030688	CG8952	FBgn0032706	Irk3	FBgn0034264	CG10933	FBgn0259109		FBgn0086675	fne	FBgn0032249	CG5337	FBgn0030960	CG7053	FBgn0030670	Pis	FBgn0035676	CG6619	FBgn0003861	trp	FBgn0031428	CG9886	FBgn0000116	Argk	FBgn0052372	ltl	FBgn0023179	amon
FBgn0038139	CG8795	FBgn0030605	CG5548	FBgn0040705	CG15434	FBgn0000064	Ald	FBgn0037186	CG11241	FBgn0260484	HIP	FBgn0036210	CG14130	FBgn0017545	RpS3A	FBgn0260744	Tango9	FBgn0032075	Tsp29Fb	FBgn0036756	cln3	FBgn0037714	CG9396	FBgn0030688	CG8952	FBgn0034893	mRpL43	FBgn0015615	Cap	FBgn0010263	Rbp9	FBgn0001145	Gs2	FBgn0011277	HLH4C	FBgn0031116	CG1695	FBgn0260479	CG31904	FBgn0005614	trpl	FBgn0031397	CG15385	FBgn0260943	Rbp6	FBgn0051414	CG31414	FBgn0031999	CG8419
FBgn0035308	CG15822	FBgn0024251	bbx	FBgn0003149	Prm	FBgn0029768	SPR	FBgn0036381	CG8745	FBgn0029676	HIP-R	FBgn0029964	CG1409	FBgn0004910	Eip63F-1	FBgn0010313	corto	FBgn0037000	CG5130	FBgn0033443	CG1698	FBgn0037715	CG9399	FBgn0037714	CG9396	FBgn0051730	CG31730	FBgn0040318	HGTX	FBgn0260400	elav	FBgn0038070	CG6753	FBgn0027279	l(1)G0196	FBgn0034484	CG11044	FBgn0260964	Vmat	FBgn0051221	CG31221	FBgn0034046	tun	FBgn0036319	Ent3	FBgn0033911	VGAT	FBgn0028552	gammaSnap
FBgn0041181	TepIII	FBgn0028342	l(1)G0230	FBgn0029868	CG3446	FBgn0037646	CAHbeta	FBgn0022774	Oat	FBgn0038627	CG7694	FBgn0031939	CG13796	FBgn0033544	CG7220	FBgn0038325	CG6194	FBgn0037623	CG9801	FBgn0028886	CG15279	FBgn0051202	CG31202	FBgn0027779	VhaSFD	FBgn0019949	Cdk9	FBgn0004584	Rrp1	FBgn0013334	Sap47	FBgn0032266	CG18302	FBgn0000244	by	FBgn0033906	CG8331	FBgn0043005	prt	FBgn0000439	Dfd	FBgn0032286	CG7300	FBgn0025641	DAAM	FBgn0032221	CG5375	FBgn0037789	CG6208
FBgn0004898	fd96Cb	FBgn0035817	CG7409	FBgn0000064	Ald	FBgn0039737	CG7920	FBgn0031821	CG9542	FBgn0261671	tweek	FBgn0038627	CG7694	FBgn0039690	CG1969	FBgn0033812	Pex13	FBgn0261396	Rpn3	FBgn0029762	NAAT1	FBgn0027779	VhaSFD	FBgn0031813	CG9527	FBgn0038111	CG12360	FBgn0032321	YL-1	FBgn0032013	Scgalpha	FBgn0039915	CG1732	FBgn0042650	disco-r	FBgn0036337	CG11255	FBgn0259481	Mob2	FBgn0034046	tun	FBgn0259199	CG42303	FBgn0260963		FBgn0027654	jdp	FBgn0003068	per
FBgn0004897	fd96Ca	FBgn0035982	CG4461	FBgn0029768	SPR	FBgn0031500	CG17221	FBgn0021765	scu	FBgn0040285	Scamp	FBgn0038795	CG4335	FBgn0037465	CG1105	FBgn0010348	Arf79F	FBgn0004573	5-HT7	FBgn0039674	CG1907	FBgn0031813	CG9527	FBgn0034629	Acox57D-d	FBgn0260859	Bet3	FBgn0017550	Rga	FBgn0259110	mmd	FBgn0034381	List	FBgn0000459	disco	FBgn0024740	Lip2	FBgn0020907	Scp2	FBgn0029761	SK	FBgn0038858	CG5793	FBgn0023179	amon	FBgn0032506	CG9395	FBgn0037754	CG8500
FBgn0261963	mid	FBgn0032181	CG13133	FBgn0039737	CG7920	FBgn0037891	CG5214	FBgn0036787	CG4306	FBgn0061356	CG18003	FBgn0020389	Papss	FBgn0010704	l(2)s5379	FBgn0037688	CG9356	FBgn0031535	CG12795	FBgn0039061	Ir	FBgn0034629	Acox57D-d	FBgn0039519	Cyp6a18	FBgn0262017	CG42830	FBgn0033911	VGAT	FBgn0035720	CG10077	FBgn0039911	CG1909	FBgn0002921	Atpalpha	FBgn0051871	CG31871	FBgn0023129	aay	FBgn0037521	CG2993	FBgn0034390	CG15093	FBgn0016694	Pdp1	FBgn0033876	synaptogyrin	FBgn0010399	Nmdar1
FBgn0016660	H15	FBgn0011296	l(2)efl	FBgn0004028	wupA	FBgn0000261	Cat	FBgn0035811	CG12262	FBgn0001224	Hsp23	FBgn0032181	CG13133	FBgn0016984	sktl	FBgn0025693	CG11163	FBgn0041191	Rheb	FBgn0039081	Irk2	FBgn0033981	Cyp6a21	FBgn0033982	Cyp317a1	FBgn0032821	CdGAPr	FBgn0032506	CG9395	FBgn0029979	CG10777	FBgn0011211	blw	FBgn0040377	Vha36-3	FBgn0003209	raw	FBgn0053094	Synd	FBgn0032652	CG6870	FBgn0003076	Pgm	FBgn0001150	gt	FBgn0034644	CG10082	FBgn0021847	l(2)k14710
FBgn0001226	Hsp27	FBgn0031037	CG14207	FBgn0034420	CG10737	FBgn0036759	CG5577	FBgn0052687	CG32687	FBgn0001226	Hsp27	FBgn0036715	Cad74A			FBgn0037623	CG9801	FBgn0032187	CG4839	FBgn0032706	Irk3	FBgn0039519	Cyp6a18	FBgn0038194	Cyp6d5	FBgn0036850	Gem2	FBgn0010194	Wnt5	FBgn0031926	CG6739	FBgn0019985	mGluRA	FBgn0035649	CG10483	FBgn0034381	List	FBgn0004117	Tm2	FBgn0046114	Gclm			FBgn0031999	CG8419	FBgn0034606	ASPP	FBgn0034885	CG4019
FBgn0001227	Hsp67Ba	FBgn0039112	CG10219	FBgn0035978	UGP	FBgn0034387	Cyp12b2	FBgn0000566	Eip55E	FBgn0032935	CG8678	FBgn0039294	Cad96Cb			FBgn0000183	BicD	FBgn0042175	CG18858	FBgn0030688	CG8952	FBgn0038194	Cyp6d5	FBgn0025454	Cyp6g1	FBgn0261792	snRNP-U1-C	FBgn0003267	ro	FBgn0025740	plexB	FBgn0039081	Irk2	FBgn0033739	Dyb	FBgn0030872	Ucp4A	FBgn0028879	CG15270	FBgn0002937	ninaB			FBgn0028552	gammaSnap	FBgn0000037	mAcR-60C	FBgn0052372	ltl
FBgn0011296	l(2)efl	FBgn0036359	CG14105	FBgn0034387	Cyp12b2	FBgn0036449	bmm	FBgn0000261	Cat	FBgn0035850	Atg18	FBgn0034242	CG14480			FBgn0052280	CG32280	FBgn0051683	CG31683	FBgn0037714	CG9396	FBgn0031182	Cyp6t1	FBgn0015039	Cyp9b2	FBgn0029877	CG17717	FBgn0031421		FBgn0038956	CG5379	FBgn0039908	Asator	FBgn0039530	Tusp	FBgn0027610	Dic1	FBgn0031066	CoVIb					FBgn0037789	CG6208	FBgn0037546	CG7918	FBgn0051414	CG31414
FBgn0031037	CG14207	FBgn0023129	aay	FBgn0039667	CG2010	FBgn0030607	dob	FBgn0036759	CG5577	FBgn0260945	Atg1	FBgn0083940	CG34104			FBgn0031535	CG12795	FBgn0261983	l(2)gd1	FBgn0037715	CG9399	FBgn0015039	Cyp9b2	FBgn0038037	Cyp9f2	FBgn0034732	CG3701	FBgn0023081	gek	FBgn0029962	CG1402	FBgn0259170	alpha-Man-I	FBgn0003656	sws	FBgn0037714	CG9396	FBgn0003141	pr					FBgn0003068	per	FBgn0260934	par-1	FBgn0029891	Pink1
FBgn0036715	Cad74A	FBgn0032673	CG7180	FBgn0010808	l(3)03670	FBgn0085452	CG34423	FBgn0039543	CG12428	FBgn0039632	Cul-5	FBgn0038917	CG6678			FBgn0030136	RpS28b	FBgn0016650	Lgr1	FBgn0027779	VhaSFD	FBgn0038037	Cyp9f2	FBgn0022097	Vha36-1	FBgn0085503	CG40625	FBgn0053182	Kdm4B	FBgn0030719	eIF5	FBgn0002921	Atpalpha	FBgn0085410	TrissinR	FBgn0037715	CG9399	FBgn0051481	pb					FBgn0035016	CG4612	FBgn0038659	endoA	FBgn0010225	Gel
FBgn0003892	ptc	FBgn0014028	SdhB	FBgn0036837	CG18135	FBgn0036837	CG18135	FBgn0037440	CG1041	FBgn0086901	cv-c	FBgn0015793	Rab-RP3			FBgn0028398	Taf10	FBgn0028703	Nhe3	FBgn0031813	CG9527	FBgn0038076	Cyp313a4	FBgn0003515	st	FBgn0040037	JYalpha	FBgn0026064	KP78a	FBgn0040324	Ephrin	FBgn0039830	CG1746	FBgn0031770	CG13995	FBgn0000244	by	FBgn0004507	GlyP					FBgn0037754	CG8500	FBgn0034433	endoB	FBgn0032221	CG5375
FBgn0083940	CG34104	FBgn0004117	Tm2	FBgn0031830	CoVb	FBgn0023535	arg	FBgn0037537	CG2767	FBgn0086690	cp309	FBgn0261341	verm			FBgn0000721	for	FBgn0023172	RhoGEF2	FBgn0034629	Acox57D-d	FBgn0030369	Cyp318a1	FBgn0031514	CG3332	FBgn0033955	CG12866	FBgn0259823	CG42404	FBgn0033791	Drl-2	FBgn0086348	se	FBgn0036680	Cpr73D	FBgn0042650	disco-r	FBgn0035538	DopEcR					FBgn0016120	ATPsyn-d	FBgn0031285	CG3662	FBgn0083962	CG34126
FBgn0028688	Rpn7	FBgn0259678	sqa	FBgn0250819	CG33521	FBgn0043783	CG32444	FBgn0085520	CG40801	FBgn0086674	Tango13	FBgn0260653	serp			FBgn0044826	Pak3	FBgn0036727	CG7589	FBgn0033981	Cyp6a21	FBgn0022097	Vha36-1	FBgn0050016	CG30016	FBgn0031571	CG3921	FBgn0010313	corto	FBgn0058178	CG40178	FBgn0031384	CG4238	FBgn0033054	CG14591	FBgn0000459	disco	FBgn0259234	Camta					FBgn0001202	hk	FBgn0035187	Trh	FBgn0027654	jdp
FBgn0004117	Tm2	FBgn0034497	CG9090	FBgn0040239	bc10	FBgn0031428	CG9886	FBgn0020513	ade5	FBgn0034117	CG7997	FBgn0032598	ChLD3			FBgn0020647	KrT95D	FBgn0036257	RhoGAP68F	FBgn0013771	Cyp6a9	FBgn0024238	Fim	FBgn0033294	Mal-A4	FBgn0010590	Prosbeta1	FBgn0261823	Asx	FBgn0039938	Sox102F	FBgn0031770	CG13995	FBgn0019650	toy	FBgn0004797	mdy	FBgn0082582	tmod					FBgn0034693	CG11073	FBgn0011288	Snap25	FBgn0033413	prel
FBgn0261341	verm	FBgn0031066	CoVIb	FBgn0027356	Amph	FBgn0029870	Marf	FBgn0036806	Cyp12c1	FBgn0033476	oys	FBgn0052499	Cda4			FBgn0016650	Lgr1	FBgn0038809	CG16953	FBgn0039519	Cyp6a18	FBgn0003515	st	FBgn0002571	Mal-A3	FBgn0038332	CG6136	FBgn0039137	CG13604	FBgn0260943	Rbp6	FBgn0033054	CG14591	FBgn0260964	Vmat	FBgn0037612	CG8112	FBgn0052600	dpr8					FBgn0053513	Nmdar2	FBgn0033031	CG8245	FBgn0033876	synaptogyrin
FBgn0260653	serp	FBgn0067783	att-ORFA	FBgn0261611	CG42700	FBgn0000715	Fmrf	FBgn0260388	CG42514	FBgn0033834	CG4744	FBgn0032707	CG10348			FBgn0030791	CG9132	FBgn0035528	CG15012	FBgn0038194	Cyp6d5	FBgn0031514	CG3332	FBgn0050360	Mal-A6	FBgn0032650	CG7094	FBgn0037623	CG9801	FBgn0052532	CG32532	FBgn0030558	CG1461	FBgn0259481	Mob2	FBgn0034629	Acox57D-d	FBgn0001624	dlg1					FBgn0010399	Nmdar1	FBgn0085396	CG34367	FBgn0034644	CG10082
FBgn0052499	Cda4	FBgn0002772	Mlc1	FBgn0032129	jp	FBgn0262475	bru-2	FBgn0030966	CG7280	FBgn0034688	CG11474	FBgn0086901	cv-c			FBgn0052190	NUCB1	FBgn0002787	Mov34	FBgn0025454	Cyp6g1	FBgn0030641	CG6299	FBgn0033297	Mal-A8	FBgn0003460	so	FBgn0001235	hth	FBgn0040752	Prosap	FBgn0039909	CG1970	FBgn0034135	Syn2	FBgn0027572	CG5009	FBgn0261262	CG42613					FBgn0259109		FBgn0030997	CG7990	FBgn0034606	ASPP
FBgn0085261	CG34232	FBgn0016013	Faa	FBgn0029870	Marf	FBgn0033189		FBgn0027601	pdgy	FBgn0028864	CG18477	FBgn0040666	CG12848			FBgn0035528	CG15012	FBgn0028695	Rpn1	FBgn0031182	Cyp6t1	FBgn0033097	CG9430	FBgn0033296	Mal-A7	FBgn0015721	king-tubby	FBgn0261953	AP-2	FBgn0036319	Ent3	FBgn0041181	TepIII	FBgn0037084	Syx6	FBgn0086348	se	FBgn0034797	nahoda					FBgn0003380	Sh	FBgn0086784	stmA	FBgn0000037	mAcR-60C
FBgn0035964	Dhpr	FBgn0032833	CoIV	FBgn0010423	TpnC47D	FBgn0017567	ND23	FBgn0085453	CG34424	FBgn0051780	CG31780	FBgn0030707	CG8916			FBgn0034744	Vps20	FBgn0032170	CG4658	FBgn0015039	Cyp9b2	FBgn0038412	Zip3	FBgn0032381	Mal-B1	FBgn0004101	bs	FBgn0001122	G-oalpha47A	FBgn0004509	Fur1	FBgn0053296	CG33296	FBgn0053094	Synd	FBgn0013773	Cyp6a22	FBgn0031821	CG9542					FBgn0052372	ltl	FBgn0020372	TM4SF	FBgn0020236	ATPCL
FBgn0035300	CG1139	FBgn0021906	RFeSP	FBgn0013348	TpnC41C	FBgn0032394	CG6746	FBgn0034364	CG5493	FBgn0032638	CG6639	FBgn0061197	SIP2			FBgn0022023	eIF-3p40	FBgn0039591	CG9988	FBgn0038037	Cyp9f2	FBgn0050016	CG30016	FBgn0002570	Mal-A1	FBgn0026411	Lim1	FBgn0002932	neur	FBgn0037789	CG6208	FBgn0260479	CG31904	FBgn0028879	CG15270	FBgn0000473	Cyp6a2	FBgn0260753	Pdfr					FBgn0039358	CG5028	FBgn0039430	CG5455	FBgn0260934	par-1
FBgn0030816	CG16700	FBgn0031322	CG5001	FBgn0033027	TpnC4	FBgn0035656	CG10479	FBgn0023535	arg	FBgn0032639	CG18563	FBgn0039859	CG11539			FBgn0050394	CG30394	FBgn0261394	Pros29	FBgn0033775	Cyp9h1	FBgn0001404	egh	FBgn0002569	Mal-A2	FBgn0051559	CG31559	FBgn0005677	dac	FBgn0028961	AlstR	FBgn0260964	Vmat	FBgn0013307	Odc1	FBgn0038194	Cyp6d5	FBgn0029137	Patsas					FBgn0051475	CG31475	FBgn0027491	Cdk5alpha	FBgn0038659	endoA
FBgn0028684	Tbp-1	FBgn0032497	CG6043	FBgn0000715	Fmrf	FBgn0031771	CG9140	FBgn0029118	Sucb	FBgn0031471	CG3117	FBgn0004053	zen			FBgn0001218	Hsc70-3	FBgn0031533	CG2772	FBgn0038076	Cyp313a4	FBgn0033294	Mal-A4	FBgn0034289	CG10910	FBgn0029662	CG12206	FBgn0000273	Pka-C1	FBgn0035016	CG4612	FBgn0020389	Papss	FBgn0036145	CG7607	FBgn0033065	Cyp6w1	FBgn0030421	CG3812					FBgn0033911	VGAT	FBgn0010014	CanB	FBgn0031285	CG3662
FBgn0085378	CG34349	FBgn0001092	Gapdh2	FBgn0033189		FBgn0032286	CG7300	FBgn0037239	CG11739	FBgn0035496	CG14990	FBgn0052354	CG32354			FBgn0034990	CG11406	FBgn0036996	mag	FBgn0030369	Cyp318a1	FBgn0002571	Mal-A3	FBgn0027106	inx7	FBgn0033933	CG10104	FBgn0027950	MBD-like	FBgn0037754	CG8500	FBgn0259481	Mob2	FBgn0030707	CG8916	FBgn0025454	Cyp6g1	FBgn0003149	Prm					FBgn0037275	CG14655	FBgn0035521	VhaM9.7-a	FBgn0035187	Trh
FBgn0031322	CG5001	FBgn0001091	Gapdh1	FBgn0035600	CG4769	FBgn0017581	Lk6	FBgn0031428	CG9886	FBgn0033320	CG8586	FBgn0034117	CG7997			FBgn0039291	CG13663	FBgn0051091	CG31091	FBgn0022097	Vha36-1	FBgn0050360	Mal-A6	FBgn0037100	capaR	FBgn0032723	ssp3	FBgn0040505	Alk	FBgn0053513	Nmdar2	FBgn0020907	Scp2	FBgn0035756	unc-13-4A	FBgn0031182	Cyp6t1	FBgn0052683	CG32683					FBgn0032221	CG5375	FBgn0003423	slgA	FBgn0011288	Snap25
FBgn0031760	Tsp26A	FBgn0052311	zormin	FBgn0017567	ND23	FBgn0261439	SdhA	FBgn0027945	ppl	FBgn0032729	CG10639	FBgn0039217	CG13627			FBgn0050115	GEFmeso	FBgn0038070	CG6753	FBgn0003515	st	FBgn0033297	Mal-A8	FBgn0052495	CG32495	FBgn0031575	Cep97	FBgn0000557	Ef1alpha100E	FBgn0010399	Nmdar1	FBgn0036359	CG14105	FBgn0051481	pb	FBgn0033697	Cyp6t3	FBgn0036544	sff					FBgn0083962	CG34126	FBgn0004435	Galpha49B	FBgn0085396	CG34367
FBgn0052311	zormin	FBgn0028336	l(1)G0255	FBgn0032394	CG6746	FBgn0030610	CG9065	FBgn0031397	CG15385	FBgn0034897	Sesn	FBgn0033154	CG1850			FBgn0016726	RpL29	FBgn0023495	Lip3	FBgn0031514	CG3332	FBgn0033296	Mal-A7	FBgn0030882	GS	FBgn0035422	RpL28	FBgn0031736	CG11030	FBgn0259109		FBgn0034135	Syn2	FBgn0052112	CG32112	FBgn0015038	Cyp9b1	FBgn0087012	5-HT2					FBgn0027654	jdp	FBgn0027589	CG1688	FBgn0040349	CG3699
FBgn0037956	CG6959	FBgn0001216	Hsc70-1	FBgn0035656	CG10479	FBgn0003076	Pgm	FBgn0000053	ade3	FBgn0038221	CG3259	FBgn0030683	CG8239			FBgn0039061	Ir	FBgn0033999	CG8093	FBgn0030641	CG6299	FBgn0002570	Mal-A1	FBgn0037020	Pex14	FBgn0032680	Ntf-2r	FBgn0028996	onecut	FBgn0003380	Sh	FBgn0023129	aay	FBgn0010350	CdsA	FBgn0033775	Cyp9h1	FBgn0001263	inaD					FBgn0033502	CG12910	FBgn0039927	CG11155	FBgn0035227	CG12090
FBgn0031735	CG11029	FBgn0004507	GlyP	FBgn0031771	CG9140			FBgn0037913	fabp	FBgn0000567	Eip74EF	FBgn0050060	CG30060			FBgn0262579	Ect4	FBgn0032264	Lip4	FBgn0033097	CG9430	FBgn0002569	Mal-A2	FBgn0038098	CG7381	FBgn0052373	CG32373	FBgn0260634	eIF4G2	FBgn0040318	HGTX	FBgn0001098	Gdh	FBgn0051118	RabX4	FBgn0031689	Cyp28d1	FBgn0260866	dnr1					FBgn0032506	CG9395	FBgn0039916	CG9935	FBgn0030997	CG7990
FBgn0038053	CG18549	FBgn0038662	CG14290	FBgn0032286	CG7300			FBgn0037518	CG2641	FBgn0037094	CG7611	FBgn0036196	CG11658			FBgn0029736	CG4041	FBgn0031143	CG1532	FBgn0033096	ZIP1	FBgn0027106	inx7	FBgn0000659	fkh	FBgn0020294	ko	FBgn0037408	NPFR1	FBgn0031673	CG31650	FBgn0053094	Synd	FBgn0035538	DopEcR	FBgn0030367	Cyp311a1	FBgn0050158	CG30158					FBgn0051719	RluA-1	FBgn0038042	Scgbeta	FBgn0086784	stmA
FBgn0039620	CG1443	FBgn0038450	CG17560	FBgn0261259	Fhos			FBgn0032652	CG6870	FBgn0032350	CG6287	FBgn0028864	CG18477			FBgn0004797	mdy	FBgn0030838	CG5445	FBgn0038412	Zip3	FBgn0037100	capaR	FBgn0041630	Hexo1	FBgn0031287	CG4291	FBgn0051211	CG31211	FBgn0051475	CG31475	FBgn0004117	Tm2	FBgn0085371	CG34342	FBgn0014427	CG11899	FBgn0033985	CG10257					FBgn0033876	synaptogyrin	FBgn0004168	5-HT1A	FBgn0038198	Npc2b
FBgn0023550	CG18031	FBgn0038449	CG17562	FBgn0053556	form3			FBgn0029854	CG3566	FBgn0036571	CG12272	FBgn0051780	CG31780			FBgn0036856	CG9666	FBgn0035879	CG7112	FBgn0050016	CG30016	FBgn0052495	CG32495	FBgn0015324	Vha26	FBgn0035140	CG17180	FBgn0260795	CG42575	FBgn0033911	VGAT	FBgn0260653	serp	FBgn0035610	Lkr	FBgn0035649	CG10483	FBgn0013342	n-syb					FBgn0034644	CG10082	FBgn0004573	5-HT7	FBgn0039430	CG5455
FBgn0036279	Ncc69	FBgn0032055	CG13091	FBgn0261439	SdhA			FBgn0038858	CG5793	FBgn0031998	CG8451	FBgn0032638	CG6639			FBgn0030734	CG9911	FBgn0033443	CG1698	FBgn0033294	Mal-A4	FBgn0030882	GS	FBgn0085353	CG34324	FBgn0039743	CG7946	FBgn0010768	sqz	FBgn0029789	CG3160	FBgn0031066	CoVIb	FBgn0001624	dlg1	FBgn0019932	SamDC	FBgn0022361	Pur-alpha					FBgn0034606	ASPP	FBgn0011582	DopR	FBgn0027491	Cdk5alpha
FBgn0028687	Rpt1	FBgn0038033	CG10097	FBgn0030610	CG9065					FBgn0016917	Stat92E	FBgn0031471	CG3117			FBgn0047135	CG32276	FBgn0028886	CG15279	FBgn0002571	Mal-A3	FBgn0037020	Pex14	FBgn0025837	CG17636	FBgn0035693	CG8219	FBgn0085409	CG34380	FBgn0032221	CG5375	FBgn0002772	Mlc1	FBgn0261262	CG42613	FBgn0015519	nAcRalpha-7E	FBgn0003861	trp					FBgn0000037	mAcR-60C	FBgn0041605	cpx	FBgn0010014	CanB
FBgn0000567	Eip74EF	FBgn0039131	CG12268	FBgn0030703	MSBP					FBgn0037443	CG1021	FBgn0033320	CG8586			FBgn0024238	Fim	FBgn0028691	Rpn9	FBgn0050360	Mal-A6	FBgn0038098	CG7381	FBgn0030964	Pvf1	FBgn0037843	CG4511	FBgn0053531	Ddr	FBgn0032506	CG9395	FBgn0016013	Faa	FBgn0085426	Rgk3	FBgn0003074	Pgi	FBgn0005614	trpl					FBgn0037546	CG7918	FBgn0260004	Snmp1	FBgn0035521	VhaM9.7-a
FBgn0082582	tmod	FBgn0043792	CG30427	FBgn0003076	Pgm					FBgn0038535	alt	FBgn0036612	CG4998			FBgn0261361	CG42638	FBgn0050115	GEFmeso	FBgn0033297	Mal-A8	FBgn0000659	fkh	FBgn0020307	dve	FBgn0003279	RpL4	FBgn0260966		FBgn0034644	CG10082	FBgn0003141	pr	FBgn0039282	Bili	FBgn0036211	CG5946	FBgn0051221	CG31221					FBgn0260934	par-1	FBgn0031294	IA-2	FBgn0003423	slgA
FBgn0001311	kkv	FBgn0029821	CG4020							FBgn0033543	CG12338	FBgn0034897	Sesn			FBgn0262516	trpml	FBgn0028894	CG5869	FBgn0033296	Mal-A7	FBgn0015324	Vha26	FBgn0259678	sqa	FBgn0032210	CYLD	FBgn0027603	Ulp1	FBgn0000037	mAcR-60C	FBgn0036116	CG7888	FBgn0039536	CG18437	FBgn0016126	CaMKI	FBgn0000439	Dfd					FBgn0038659	endoA	FBgn0031414	eys	FBgn0050054	CG30054
FBgn0023174	Prosbeta2	FBgn0023550	CG18031							FBgn0032429	CG5446	FBgn0043792	CG30427			FBgn0032822	CG10466	FBgn0036372	CG10083	FBgn0002570	Mal-A1	FBgn0261625	CG42708	FBgn0085261	CG34232	FBgn0033092	CG9422	FBgn0015558	tty	FBgn0037546	CG7918	FBgn0001092	Gapdh2	FBgn0261599	RpS29	FBgn0026576	CG5991	FBgn0004516	Gad1					FBgn0034433	endoB	FBgn0039681	CG7582	FBgn0004435	Galpha49B
FBgn0001321	knk	FBgn0010217	ATPsyn-beta							FBgn0037696	CG9362	FBgn0038751	CG4770			FBgn0030890	CG7536	FBgn0010288	Uch	FBgn0002569	Mal-A2	FBgn0085353	CG34324	FBgn0039068	CG13827	FBgn0052703	Erk7	FBgn0033378	tsu	FBgn0260934	par-1	FBgn0010350	CdsA	FBgn0260753	Pdfr	FBgn0039530	Tusp	FBgn0005619	Hdc					FBgn0031285	CG3662	FBgn0053517	D2R	FBgn0031995	CG8475
FBgn0038535	alt	FBgn0001989	l(2)35Di							FBgn0020385	pug	FBgn0000567	Eip74EF			FBgn0260855	Sec22	FBgn0028399	TMS1	FBgn0027106	inx7	FBgn0031245	CG3625	FBgn0033216	CG1946	FBgn0011817	nmo	FBgn0029105	alpha-catenin-related	FBgn0038659	endoA	FBgn0004507	GlyP	FBgn0004575	Syn	FBgn0037265	CG12001	FBgn0050446	Tdc2					FBgn0011288	Snap25	FBgn0000273	Pka-C1	FBgn0038621	CG10864
FBgn0034797	nahoda	FBgn0031359	CG18317							FBgn0030431	CG4407	FBgn0001311	kkv			FBgn0013751	Awh	FBgn0030688	CG8952	FBgn0037100	capaR	FBgn0023510	Rbcn-3B	FBgn0035300	CG1139	FBgn0013469	klu	FBgn0010905	Spn	FBgn0034433	endoB	FBgn0035538	DopEcR	FBgn0050021	metro	FBgn0032382	Mal-B2	FBgn0031692	TpnC25D					FBgn0259823	CG42404	FBgn0032800	CG10137	FBgn0027589	CG1688
FBgn0085426	Rgk3	FBgn0023540	CG3630							FBgn0030029	CG15343	FBgn0039270	PQBP1			FBgn0027341	Gfat1	FBgn0015283	Pros54	FBgn0052495	CG32495	FBgn0020307	dve	FBgn0033760	CG8785	FBgn0029880	CG14443	FBgn0028400	Syt4	FBgn0035148	CG3402	FBgn0038662	CG14290	FBgn0031627	CG15630	FBgn0003965	v	FBgn0032946	nrv3					FBgn0085396	CG34367	FBgn0260446	GABA-B-R1	FBgn0039916	CG9935
FBgn0031865	Nha1	FBgn0085426	Rgk3							FBgn0041194	Prat2	FBgn0053516	dpr3			FBgn0001987	Gli	FBgn0037612	CG8112	FBgn0030882	GS	FBgn0259678	sqa	FBgn0002522	lab	FBgn0261995	CG42813	FBgn0261090	Sytbeta	FBgn0259823	CG42404	FBgn0036279	Ncc69	FBgn0000120	Arr1	FBgn0033054	CG14591	FBgn0000711	flw					FBgn0053196	dp	FBgn0027575	GABA-B-R2	FBgn0031634	Ir25a
FBgn0054056	CG34056	FBgn0034618	CG9485							FBgn0036381	CG8745	FBgn0035217	FucTD			FBgn0036448	mop	FBgn0033981	Cyp6a21	FBgn0037020	Pex14	FBgn0085261	CG34232	FBgn0030752	CG9947	FBgn0025571	SF1	FBgn0014870	Psi	FBgn0260432		FBgn0034951	CG3860	FBgn0052683	CG32683	FBgn0029834	CG5937	FBgn0029761	SK					FBgn0030997	CG7990	FBgn0016650	Lgr1	FBgn0038042	Scgbeta
FBgn0035398	Cht7	FBgn0042696	NfI							FBgn0022774	Oat	FBgn0029807	CG3108			FBgn0039637	CG11880	FBgn0039519	Cyp6a18	FBgn0038098	CG7381	FBgn0039068	CG13827	FBgn0034247	CG6484	FBgn0010602	lwr	FBgn0011277	HLH4C	FBgn0033031	CG8245	FBgn0010217	ATPsyn-beta	FBgn0000121	Arr2	FBgn0005558	ey	FBgn0259199	CG42303					FBgn0003360	sesB	FBgn0024941	RSG7	FBgn0004573	5-HT7
FBgn0023175	Prosalpha7	FBgn0028699	Rh50							FBgn0024958	Irp-1A	FBgn0001321	knk			FBgn0259168	mnb	FBgn0033982	Cyp317a1	FBgn0000659	fkh	FBgn0026409	Mpcp	FBgn0031735	CG11029	FBgn0031631	CG3225	FBgn0028999	nerfin-1	FBgn0002306	sas	FBgn0038641	CG7708	FBgn0036544	sff	FBgn0019948	Phm	FBgn0030394	Cpr11A					FBgn0086784	stmA	FBgn0259927	CG42450	FBgn0260004	Snmp1
FBgn0036685	CG6664	FBgn0031912	CG5261							FBgn0033391	CG8026	FBgn0037857	Tengl4			FBgn0036566	ClC-c	FBgn0038194	Cyp6d5	FBgn0041630	Hexo1	FBgn0033214	CG1941	FBgn0036939	CG7365	FBgn0001320	kni	FBgn0005648	Pabp2	FBgn0004370	Ptp10D	FBgn0037895	CG6723	FBgn0087012	5-HT2	FBgn0031814	retm	FBgn0051140	CG31140					FBgn0036927	CG7433	FBgn0032845	CG10747	FBgn0035815	Snmp2
FBgn0262081	Csk	FBgn0016691	Oscp							FBgn0043842	Yeti	FBgn0031099	CG17065			FBgn0040308	Jafrac2	FBgn0015039	Cyp9b2	FBgn0015324	Vha26	FBgn0033216	CG1946	FBgn0038032	CG10096	FBgn0000560	eg	FBgn0030406	CG1463	FBgn0030997	CG7990	FBgn0029950	CG9657	FBgn0028481	CG4341	FBgn0086679	p	FBgn0034789	PIP5K59B					FBgn0020372	TM4SF	FBgn0033558	CG12344	FBgn0031294	IA-2
FBgn0001981	esg	FBgn0085425	CG34396							FBgn0031534	Snx1	FBgn0085431	CG34402			FBgn0004646	ogre	FBgn0038037	Cyp9f2	FBgn0085353	CG34324	FBgn0028419	Kr-h2	FBgn0039620	CG1443	FBgn0028471	Nab2	FBgn0039338	XNP	FBgn0036927	CG7433	FBgn0052057	dpr10	FBgn0001263	inaD	FBgn0037955	CG6950							FBgn0039430	CG5455	FBgn0086913	Rab26	FBgn0038984	CG5315
FBgn0035144	CG17181	FBgn0035144	CG17181							FBgn0035204	CG2277	FBgn0031717	Oscillin			FBgn0027108	inx2	FBgn0033775	Cyp9h1	FBgn0031245	CG3625	FBgn0033760	CG8785	FBgn0050049	CG30049	FBgn0040011	CG17494	FBgn0042650	disco-r	FBgn0038198	Npc2b	FBgn0037908	dpr5	FBgn0032879	CG9317	FBgn0030558	CG1461							FBgn0027491	Cdk5alpha	FBgn0000557	Ef1alpha100E	FBgn0041191	Rheb
FBgn0039043	CG17121	FBgn0040705	CG15434							FBgn0052549	CG32549	FBgn0038806	CG5412			FBgn0028373	inx3	FBgn0030369	Cyp318a1	FBgn0030503	Tango2	FBgn0002522	lab	FBgn0034436	CG11961	FBgn0011725	twin	FBgn0000459	disco	FBgn0027865	Tsp96F	FBgn0053481	dpr7	FBgn0260866	dnr1	FBgn0041181	TepIII							FBgn0031753	CG13999	FBgn0028996	onecut	FBgn0033763	CG8646
FBgn0003149	Prm	FBgn0003149	Prm							FBgn0036787	CG4306	FBgn0052727	CG32727			FBgn0000625	eyg	FBgn0030367	Cyp311a1	FBgn0020307	dve	FBgn0034247	CG6484	FBgn0038466	CG8907	FBgn0027582	CG6230	FBgn0033696	Cyp6g2	FBgn0032943	Tsp39D	FBgn0001624	dlg1	FBgn0033985	CG10257	FBgn0053296	CG33296							FBgn0010014	CanB	FBgn0037835	CG14687	FBgn0039187	CG6454
FBgn0031879	uif	FBgn0029868	CG3446							FBgn0259714	CG42368	FBgn0026778	Rad1			FBgn0014380	RhoL	FBgn0031514	CG3332	FBgn0259678	sqa	FBgn0031735	CG11029	FBgn0030887	CG6867	FBgn0035957	CG5144	FBgn0052105	CG32105	FBgn0033629	Tsp47F	FBgn0261262	CG42613	FBgn0034387	Cyp12b2	FBgn0031935	CG13793							FBgn0035521	VhaM9.7-a	FBgn0030693	CG8974	FBgn0039681	CG7582
FBgn0036454	CG17839	FBgn0000064	Ald							FBgn0052687	CG32687	FBgn0037696	CG9362			FBgn0041182	TepII	FBgn0032822	CG10466	FBgn0052068	CG32068	FBgn0036939	CG7365	FBgn0029091	CS-2	FBgn0031772	CG13994	FBgn0036274	CG4328	FBgn0039137	CG13604	FBgn0034797	nahoda	FBgn0030607	dob	FBgn0031936	CG13794							FBgn0003423	slgA	FBgn0052581	CG32581	FBgn0022709	Adk1
FBgn0262103	Sik3	FBgn0039737	CG7920							FBgn0033605	CG9067	FBgn0054056	CG34056			FBgn0037363	CG1347	FBgn0036448	mop	FBgn0039068	CG13827	FBgn0038221	CG3259	FBgn0250757	CG42235	FBgn0261624	I-3	FBgn0000036	nAcRalpha-96Aa	FBgn0027491	Cdk5alpha	FBgn0034618	CG9485	FBgn0013342	n-syb	FBgn0035329								FBgn0004435	Galpha49B	FBgn0036934	sNPF-R	FBgn0053517	D2R
FBgn0262139	trh	FBgn0037891	CG5214							FBgn0000261	Cat	FBgn0038619	CG7685			FBgn0036111	Aps	FBgn0038412	Zip3	FBgn0026409	Mpcp	FBgn0038032	CG10096	FBgn0039873	Smvt	FBgn0003513	ss	FBgn0000024	Ace	FBgn0010014	CanB	FBgn0039282	Bili	FBgn0038733	CG11407	FBgn0035331	DmsR-1							FBgn0053639	CG33639	FBgn0030670	Pis	FBgn0032800	CG10137
FBgn0030357	Sclp	FBgn0004028	wupA							FBgn0036759	CG5577	FBgn0035179	CG12038			FBgn0039234	nct	FBgn0000308	chic	FBgn0033216	CG1946	FBgn0039620	CG1443	FBgn0039872	salt	FBgn0031488	CG17265	FBgn0001324	kto	FBgn0015614	CanB2	FBgn0042696	NfI	FBgn0259985	Mppe	FBgn0038795	CG4335							FBgn0027589	CG1688	FBgn0051211	CG31211	FBgn0260446	GABA-B-R1
FBgn0038404	CG8925	FBgn0034420	CG10737							FBgn0034366	Atg7	FBgn0035398	Cht7			FBgn0028931	CG16863	FBgn0034289	CG10910	FBgn0035300	CG1139	FBgn0034145	CG5065	FBgn0017448	CG2187	FBgn0025790	TBPH	FBgn0037504	CG1142	FBgn0035521	VhaM9.7-a	FBgn0028699	Rh50	FBgn0003861	trp	FBgn0260005	wtrw							FBgn0039927	CG11155	FBgn0260795	CG42575	FBgn0027575	GABA-B-R2
FBgn0259211	grh	FBgn0031684	CG8680							FBgn0028689	Rpn6	FBgn0030029	CG15343			FBgn0039025	CG7023	FBgn0027106	inx7	FBgn0033760	CG8785	FBgn0050043	CG30043	FBgn0038652	CG7720	FBgn0036496	CG7804	FBgn0015774	NetB	FBgn0005410	sno	FBgn0259247	laccase2	FBgn0005614	trpl	FBgn0061356	CG18003							FBgn0039916	CG9935	FBgn0032249	CG5337	FBgn0016650	Lgr1
FBgn0004583	ex	FBgn0019644	ATPsyn-b							FBgn0085520	CG40801	FBgn0039387	MCO3			FBgn0037721	CG9427	FBgn0051357	CG31357	FBgn0034247	CG6484	FBgn0050049	CG30049	FBgn0011754	PhKgamma	FBgn0004903	Rb97D	FBgn0031770	CG13995	FBgn0001235	hth	FBgn0031912	CG5261	FBgn0034446	CG7735	FBgn0086710	RpL30							FBgn0038042	Scgbeta	FBgn0031116	CG1695	FBgn0259927	CG42450
FBgn0004028	wupA	FBgn0035978	UGP							FBgn0020513	ade5	FBgn0259247	laccase2			FBgn0001226	Hsp27	FBgn0035146	CG13893	FBgn0036939	CG7365	FBgn0053012	CG33012	FBgn0024997	CG2681	FBgn0010258	Rbp4	FBgn0000308	chic	FBgn0003423	slgA	FBgn0026403	Ndg	FBgn0051221	CG31221	FBgn0037513	pyd3							FBgn0004168	5-HT1A	FBgn0052506	CG32506	FBgn0028703	Nhe3
FBgn0034366	Atg7	FBgn0034387	Cyp12b2							FBgn0036806	Cyp12c1	FBgn0067628	CG33331			FBgn0001229	Hsp67Bc	FBgn0014380	RhoL	FBgn0038032	CG10096	FBgn0034436	CG11961	FBgn0034988	CG3362	FBgn0001215	Hrb98DE	FBgn0041723	rho-5	FBgn0261953	AP-2	FBgn0085425	CG34396	FBgn0000439	Dfd	FBgn0031245	CG3625							FBgn0004573	5-HT7	FBgn0001145	Gs2	FBgn0032845	CG10747
FBgn0028689	Rpn6	FBgn0039667	CG2010							FBgn0031897	CG13784	FBgn0085484	CG34455			FBgn0035850	Atg18	FBgn0040208	Kat60	FBgn0034145	CG5065	FBgn0034439	CG10062	FBgn0036770	Prestin	FBgn0026402	NiPp1	FBgn0034657	LBR	FBgn0001122	G-oalpha47A	FBgn0031821	CG9542	FBgn0004516	Gad1	FBgn0036359	CG14105							FBgn0011582	DopR	FBgn0013948		FBgn0033558	CG12344
FBgn0015282	Pros26.4	FBgn0010808	l(3)03670							FBgn0044452	Atg2	FBgn0041174	Vhl			FBgn0035916	GAPsec	FBgn0037363	CG1347	FBgn0050043	CG30043	FBgn0038466	CG8907	FBgn0050277	Oatp58Da	FBgn0050271	CG30271	FBgn0035993	Nf-YA	FBgn0261673	nemy	FBgn0004575	Syn	FBgn0005619	Hdc	FBgn0038877	CG3308							FBgn0037796	CG12814	FBgn0029105	alpha-catenin-related	FBgn0086913	Rab26
FBgn0020412	JIL-1	FBgn0031830	CoVb							FBgn0036836	CG11619	FBgn0039943	CG17168			FBgn0038855	CG5745	FBgn0000659	fkh	FBgn0050049	CG30049	FBgn0035610	Lkr	FBgn0032433	Oatp33Ea	FBgn0051229	CG31229	FBgn0038140	CG8784	FBgn0053639	CG33639	FBgn0050021	metro	FBgn0050446	Tdc2	FBgn0032673	CG7180							FBgn0041605	cpx	FBgn0000535	eag	FBgn0028996	onecut
FBgn0037537	CG2767	FBgn0250819	CG33521							FBgn0027601	pdgy	FBgn0259714	CG42368			FBgn0034061	CG8386	FBgn0041630	Hexo1	FBgn0034436	CG11961	FBgn0030887	CG6867	FBgn0032435	Oatp33Eb	FBgn0053061	CG33061	FBgn0031239	CG17075	FBgn0261574	kug	FBgn0030421	CG3812	FBgn0029870	Marf	FBgn0013307	Odc1							FBgn0260004	Snmp1	FBgn0032266	CG18302	FBgn0037835	CG14687
FBgn0051321	CG31321	FBgn0260008	Ucrh							FBgn0037339	Pi4KIIalpha	FBgn0031725	CG14010			FBgn0032147	IP3K1	FBgn0039234	nct	FBgn0034439	CG10062	FBgn0029091	CS-2	FBgn0044872	FucTC	FBgn0026147	CG16833	FBgn0034013	unc-5	FBgn0023023	CRMP	FBgn0003149	Prm	FBgn0032946	nrv3	FBgn0052068	CG32068							FBgn0031294	IA-2	FBgn0024740	Lip2	FBgn0030693	CG8974
FBgn0035954	Doc3	FBgn0047038	CG6463							FBgn0034364	CG5493	FBgn0031837	CG11320			FBgn0010379	Akt1	FBgn0259481	Mob2	FBgn0038466	CG8907	FBgn0031998	CG8451	FBgn0034406	Jheh3	FBgn0039669	CG2014	FBgn0086902	kis	FBgn0259242	CG42340	FBgn0259714	CG42368	FBgn0029761	SK	FBgn0036698	CG7724							FBgn0031414	eys	FBgn0051871	CG31871	FBgn0052581	CG32581
FBgn0035956	Doc2	FBgn0027356	Amph							FBgn0030711	Rrp47	FBgn0023001	melt			FBgn0054015	CG34015	FBgn0032949	Lamp1	FBgn0029091	CS-2	FBgn0250757	CG42235	FBgn0031865	Nha1	FBgn0086129	snama	FBgn0029834	CG5937	FBgn0260971	CG42594	FBgn0031725	CG14010	FBgn0037521	CG2993	FBgn0036146	CG14141							FBgn0262559	Mdh2	FBgn0039915	CG1732	FBgn0036934	sNPF-R
FBgn0052249	CG32249	FBgn0037643	skap							FBgn0035866	CG7197	FBgn0032813	CG10262			FBgn0037718	P58IPK	FBgn0032935	CG8678	FBgn0031998	CG8451	FBgn0039873	Smvt	FBgn0051052		FBgn0039788	Rpt6R	FBgn0019650	toy	FBgn0027589	CG1688	FBgn0031627	CG15630	FBgn0023212	Elongin-B	FBgn0036145	CG7607							FBgn0039681	CG7582	FBgn0034381	List	FBgn0030670	Pis
FBgn0030186	CG2962	FBgn0261611	CG42700							FBgn0029118	Sucb	FBgn0033605	CG9067			FBgn0015376	cutlet	FBgn0035850	Atg18	FBgn0250757	CG42235	FBgn0039872	salt	FBgn0030984	tgy	FBgn0036497	ran-like	FBgn0005558	ey	FBgn0039927	CG11155	FBgn0036454	CG17839	FBgn0033463	CG1513	FBgn0067783	att-ORFA							FBgn0085347		FBgn0259225	Pde1c	FBgn0260795	CG42575
FBgn0052248	CG32248	FBgn0020235	ATPsyn-gamma							FBgn0037239	CG11739	FBgn0031413	CG9967			FBgn0030964	Pvf1	FBgn0260945	Atg1	FBgn0039873	Smvt	FBgn0017448	CG2187	FBgn0052557	CG32557	FBgn0034535	CG11110	FBgn0035676	CG6619	FBgn0261509	haf	FBgn0036544	sff	FBgn0034136	DAT	FBgn0016013	Faa							FBgn0053517	D2R	FBgn0014859	Hr38	FBgn0032249	CG5337
FBgn0030541	CG11584	FBgn0032129	jp							FBgn0034002	CG8079	FBgn0051690	CG31690			FBgn0015239	Hr78	FBgn0025837	CG17636	FBgn0039872	salt	FBgn0038652	CG7720	FBgn0032116	CG3759	FBgn0039050	CG17110	FBgn0260484	HIP	FBgn0038042	Scgbeta	FBgn0033605	CG9067	FBgn0017581	Lk6	FBgn0036116	CG7888							FBgn0000273	Pka-C1	FBgn0028400	Syt4	FBgn0031116	CG1695
FBgn0032685	CG10211	FBgn0010423	TpnC47D							FBgn0035679	CG10467	FBgn0000261	Cat			FBgn0039045	CG17119	FBgn0028688	Rpn7	FBgn0017448	CG2187	FBgn0011754	PhKgamma	FBgn0028662	VhaPPA1-1	FBgn0034510	CG13426	FBgn0029676	HIP-R	FBgn0004168	5-HT1A	FBgn0087012	5-HT2	FBgn0000414	Dab	FBgn0030707	CG8916							FBgn0028397	Tob	FBgn0261090	Sytbeta	FBgn0052506	CG32506
FBgn0040660	CG13551	FBgn0013348	TpnC41C							FBgn0027945	ppl	FBgn0037140	CG7442			FBgn0027338	Kap-alpha3	FBgn0034197	Cda9	FBgn0038652	CG7720	FBgn0024997	CG2681	FBgn0035770	pst	FBgn0039147	CG10694	FBgn0261671	tweek	FBgn0004573	5-HT7	FBgn0003520	stau	FBgn0034789	PIP5K59B	FBgn0003748	Treh							FBgn0032800	CG10137	FBgn0039911	CG1909	FBgn0032752	CG10702
FBgn0034553	CG9993	FBgn0033027	TpnC4							FBgn0038745	CG4538	FBgn0033524	Cyp49a1			FBgn0035715	CG10103	FBgn0259678	sqa	FBgn0024997	CG2681	FBgn0034988	CG3362	FBgn0001981	esg	FBgn0035540	Syx17	FBgn0039429	CG14238	FBgn0011582	DopR	FBgn0035266	Gk	FBgn0002937	ninaB	FBgn0051481	pb							FBgn0260446	GABA-B-R1	FBgn0030960	CG7053	FBgn0034484	CG11044
FBgn0034552	CG17999	FBgn0000667	Actn							FBgn0000053	ade3	FBgn0033753	Cyp301a1			FBgn0261268	Cul-3	FBgn0085261	CG34232	FBgn0034988	CG3362	FBgn0036770	Prestin	FBgn0085484	CG34455	FBgn0034133	CG7813	FBgn0000659	fkh	FBgn0004624		FBgn0037891	CG5214			FBgn0035231	Cct2							FBgn0027575	GABA-B-R2	FBgn0019985	mGluRA	FBgn0001145	Gs2
FBgn0040397	CG3655	FBgn0033189								FBgn0033544	CG7220	FBgn0032685	CG10211			FBgn0259227	CG42327	FBgn0039068	CG13827	FBgn0036770	Prestin	FBgn0050277	Oatp58Da	FBgn0032850	Kua	FBgn0042712	HBS1	FBgn0011655	Med	FBgn0005677	dac	FBgn0001263	inaD			FBgn0031815	frj							FBgn0016650	Lgr1	FBgn0039081	Irk2	FBgn0029105	alpha-catenin-related
FBgn0051224	CG31224	FBgn0035600	CG4769							FBgn0035632	Ppat-Dpck	FBgn0036836	CG11619			FBgn0004687	Mlc-c	FBgn0027363	Stam	FBgn0050277	Oatp58Da	FBgn0032433	Oatp33Ea	FBgn0033075	Pld	FBgn0015544	spag	FBgn0026160	tna	FBgn0028499	CG7985	FBgn0032879	CG9317			FBgn0261698	CG42732							FBgn0024941	RSG7	FBgn0039908	Asator	FBgn0036337	CG11255
FBgn0029082	hbs	FBgn0017567	ND23							FBgn0037972	CG10005	FBgn0032881	CG9319			FBgn0003748	Treh	FBgn0033240	CG2906	FBgn0032433	Oatp33Ea	FBgn0032435	Oatp33Eb	FBgn0000455	Dip-C	FBgn0004372	aly	FBgn0015014		FBgn0086911	rg	FBgn0033778	CG3790			FBgn0032638	CG6639							FBgn0259927	CG42450	FBgn0042650	disco-r	FBgn0032266	CG18302
FBgn0036843	CG6812	FBgn0032394	CG6746							FBgn0028341	l(1)G0232	FBgn0039749	CG11498			FBgn0013770	Cp1	FBgn0034032	CG8195	FBgn0032435	Oatp33Eb	FBgn0044872	FucTC	FBgn0051823	CG31823	FBgn0050325	CG30325	FBgn0011740	alpha-Man-II	FBgn0035989	CG3967	FBgn0004028	wupA			FBgn0032507	CG9377							FBgn0033558	CG12344	FBgn0000459	disco	FBgn0032264	Lip4
FBgn0043364	cbt	FBgn0038293	CG6904							FBgn0261985	Ptpmeg	FBgn0023535	arg			FBgn0052640	CG32640	FBgn0028684	Tbp-1	FBgn0044872	FucTC	FBgn0029804	CG3097	FBgn0035154	CG3344	FBgn0038686	CG5555	FBgn0262582	cic	FBgn0031414	eys	FBgn0260866	dnr1			FBgn0033321	CG8738							FBgn0086913	Rab26	FBgn0002921	Atpalpha	FBgn0024740	Lip2
FBgn0020378	Sp1	FBgn0035656	CG10479							FBgn0029092	ced-6	FBgn0029082	hbs			FBgn0052641	CG32641	FBgn0011225	jar	FBgn0029804	CG3097	FBgn0034406	Jheh3	FBgn0052483	CG32483	FBgn0034919	CG5569	FBgn0031186	CG14614	FBgn0033763	CG8646	FBgn0050158	CG30158			FBgn0033320	CG8586							FBgn0038809	CG16953	FBgn0000473	Cyp6a2	FBgn0051871	CG31871
FBgn0261555	CG42673	FBgn0031771	CG9140							FBgn0037702	CG8176	FBgn0037239	CG11739			FBgn0031322	CG5001	FBgn0044020	Roc2	FBgn0034406	Jheh3	FBgn0031865	Nha1	FBgn0027558	pgant3	FBgn0020506	Amyrel	FBgn0000179	bi	FBgn0085347		FBgn0033985	CG10257			FBgn0037627	CG13318							FBgn0028996	onecut	FBgn0031182	Cyp6t1	FBgn0003209	raw
FBgn0051694	CG31694	FBgn0261259	Fhos							FBgn0033463	CG1513	FBgn0039368	CG17196			FBgn0086674	Tango13	FBgn0033476	oys	FBgn0031865	Nha1	FBgn0051052		FBgn0038404	CG8925	FBgn0036465	Rpn12R	FBgn0016660	H15	FBgn0031530	pgant2	FBgn0086359	Invadolysin			FBgn0032729	CG10639							FBgn0037835	CG14687	FBgn0038236	Cyp313a1	FBgn0035879	CG7112
FBgn0000422	Ddc	FBgn0053556	form3							FBgn0030183	CG15309	FBgn0039366	CG17198			FBgn0032497	CG6043	FBgn0026084	cib	FBgn0051052		FBgn0030984	tgy	FBgn0037144	CG7458	FBgn0031941	CG7211	FBgn0001226	Hsp27	FBgn0053517	D2R	FBgn0037537	CG2767			FBgn0033555	RpS15Ab							FBgn0036934	sNPF-R	FBgn0030367	Cyp311a1	FBgn0034381	List
FBgn0035981	CG4452	FBgn0261439	SdhA							FBgn0030735	CG3632	FBgn0034651	CG15676			FBgn0037279	CG1129	FBgn0030752	CG9947	FBgn0030984	tgy	FBgn0052557	CG32557	FBgn0037140	CG7442	FBgn0025455	CycT	FBgn0001227	Hsp67Ba	FBgn0000273	Pka-C1	FBgn0051321	CG31321			FBgn0038662	CG14290							FBgn0037408	NPFR1	FBgn0053147	Hs3st-A	FBgn0029762	NAAT1
FBgn0010423	TpnC47D	FBgn0030610	CG9065							FBgn0033373	CG8080	FBgn0034402	CG15084			FBgn0026084	cib	FBgn0036196	CG11658	FBgn0052557	CG32557	FBgn0032116	CG3759	FBgn0036411	Sox21a	FBgn0030247	CG15208	FBgn0015609	CadN	FBgn0032800	CG10137	FBgn0013342	n-syb			FBgn0039525	CG5646							FBgn0030670	Pis	FBgn0035649	CG10483	FBgn0259225	Pde1c
FBgn0010424	TpnC73F	FBgn0039635	CG11876							FBgn0033460	sec24	FBgn0000075	amd			FBgn0031760	Tsp26A	FBgn0015794	Rab-RP4	FBgn0032116	CG3759	FBgn0028662	VhaPPA1-1	FBgn0030005	CG2120	FBgn0035497	CG14995	FBgn0031603	CG15432	FBgn0260446	GABA-B-R1	FBgn0010808	l(3)03670			FBgn0030218	CG1628							FBgn0051211	CG31211	FBgn0052105	CG32105	FBgn0028400	Syt4
FBgn0028690	Rpn5	FBgn0003076	Pgm							FBgn0000109	Aprt	FBgn0034452	Oseg6			FBgn0086706	pix	FBgn0038221	CG3259	FBgn0028662	VhaPPA1-1	FBgn0035770	pst	FBgn0261862	whd	FBgn0028852	CG15262	FBgn0053558	mim	FBgn0027575	GABA-B-R2	FBgn0038733	CG11407			FBgn0019830	colt							FBgn0260795	CG42575	FBgn0015519	nAcRalpha-7E	FBgn0261090	Sytbeta
FBgn0039690	CG1969											FBgn0037913	fabp			FBgn0036196	CG11658	FBgn0036255	Atg12	FBgn0035770	pst	FBgn0085484	CG34455	FBgn0260866	dnr1	FBgn0035532	CG15014	FBgn0261872	scaf6	FBgn0028743	CG5036	FBgn0085453	CG34424			FBgn0039620	CG1443							FBgn0032249	CG5337	FBgn0000024	Ace	FBgn0039911	CG1909
FBgn0002973	numb											FBgn0037972	CG10005			FBgn0052311	zormin	FBgn0050043	CG30043	FBgn0085484	CG34455	FBgn0030300	Sk1	FBgn0033093	CG3270	FBgn0260741	CG3281	FBgn0034750	CG3732	FBgn0024941	RSG7	FBgn0000529	bsh			FBgn0033464	CG1441							FBgn0031116	CG1695	FBgn0033739	Dyb	FBgn0030960	CG7053
FBgn0035103	Vdup1											FBgn0035103	Vdup1			FBgn0016700	Rab1	FBgn0053013	CR33013	FBgn0052196	CG32196	FBgn0032850	Kua	FBgn0030478	CG1640	FBgn0035021	CG4622	FBgn0033029	l(2)NC136	FBgn0259927	CG42450	FBgn0038818	Nep4			FBgn0036279	Ncc69							FBgn0052506	CG32506	FBgn0039738	Mgat2	FBgn0019985	mGluRA
FBgn0028692	Rpn2											FBgn0029854	CG3566			FBgn0031090	Rab35	FBgn0053012	CG33012	FBgn0030300	Sk1	FBgn0052687	CG32687	FBgn0038680	Cyp12a5	FBgn0003267	ro	FBgn0033987	ckn	FBgn0020245	ttv	FBgn0023535	arg			FBgn0034440	CG10073							FBgn0032752	CG10702	FBgn0036043	CG8177	FBgn0004654	Pgd
FBgn0032286	CG7300											FBgn0001942	eIF-4a			FBgn0261914		FBgn0034437	CG10051	FBgn0032850	Kua	FBgn0036820	CG6852	FBgn0038681	Cyp12a4	FBgn0000492	Dr	FBgn0040281	Aplip1	FBgn0032135	GlcAT-S	FBgn0022361	Pur-alpha			FBgn0034951	CG3860							FBgn0004574	Rop	FBgn0016126	CaMKI	FBgn0039081	Irk2
FBgn0030394	Cpr11A											FBgn0004110	tin			FBgn0039249	CG11168	FBgn0038466	CG8907	FBgn0052687	CG32687	FBgn0051823	CG31823	FBgn0052564	CG32564	FBgn0037742	Rpt3R	FBgn0034070	SP2353	FBgn0086913	Rab26	FBgn0259985	Mppe			FBgn0035519	CG1309							FBgn0001145	Gs2	FBgn0026576	CG5991	FBgn0039908	Asator
FBgn0033886	CG13349											FBgn0030992	CG33253			FBgn0034897	Sesn	FBgn0028687	Rpt1	FBgn0000455	Dip-C	FBgn0035154	CG3344	FBgn0034588	CG9394	FBgn0030455	CG4318	FBgn0035987	CG3689	FBgn0040505	Alk	FBgn0003861	trp			FBgn0032350	CG6287							FBgn0013948		FBgn0039530	Tusp	FBgn0000244	by
FBgn0250785	vari											FBgn0037986	CG14736			FBgn0019886	Letm1	FBgn0034951	CG3860	FBgn0036820	CG6852	FBgn0052483	CG32483	FBgn0039156	CG6178	FBgn0031421		FBgn0010379	Akt1	FBgn0000557	Ef1alpha100E	FBgn0005614	trpl			FBgn0037895	CG6723							FBgn0029105	alpha-catenin-related	FBgn0085410	TrissinR	FBgn0042650	disco-r
												FBgn0053993	CG33993			FBgn0000567	Eip74EF	FBgn0035610	Lkr	FBgn0051823	CG31823	FBgn0038404	CG8925	FBgn0038731	CG11659	FBgn0033845	mars	FBgn0031955	CG14535	FBgn0028996	onecut	FBgn0047038	CG6463			FBgn0035293	CG5687							FBgn0000535	eag	FBgn0031770	CG13995	FBgn0000459	disco
												FBgn0035656	CG10479			FBgn0037094	CG7611	FBgn0037094	CG7611	FBgn0035154	CG3344	FBgn0037144	CG7458	FBgn0038730	CG6300	FBgn0036641	Smn	FBgn0032225	CG5022	FBgn0003165	pum	FBgn0027356	Amph			FBgn0037908	dpr5							FBgn0032266	CG18302	FBgn0036680	Cpr73D	FBgn0037612	CG8112
												FBgn0030841	CG8568			FBgn0011217	eff	FBgn0015278	Pi3K68D	FBgn0052483	CG32483	FBgn0030005	CG2120	FBgn0038734	CG11453	FBgn0034202	CG17287	FBgn0011640	lark	FBgn0036934	sNPF-R	FBgn0029935	CG4615			FBgn0053512	dpr4							FBgn0051871	CG31871	FBgn0004919	gol	FBgn0027572	CG5009
												FBgn0030183	CG15309			FBgn0032350	CG6287	FBgn0250757	CG42235	FBgn0038404	CG8925	FBgn0033093	CG3270	FBgn0035006	CG4563	FBgn0031388	CG12674	FBgn0020307	dve	FBgn0037408	NPFR1	FBgn0034446	CG7735			FBgn0261871	dpr2							FBgn0035879	CG7112	FBgn0033054	CG14591	FBgn0033981	Cyp6a21
												FBgn0026749	Yippee			FBgn0038652	CG7720	FBgn0039270	PQBP1	FBgn0030005	CG2120	FBgn0030478	CG1640	FBgn0033733	CG8834	FBgn0034794	Gmer	FBgn0003720	tll	FBgn0051211	CG31211	FBgn0261722	fwe			FBgn0031860	CG11236							FBgn0039915	CG1732	FBgn0041723	rho-5	FBgn0000473	Cyp6a2
												FBgn0024184	unc-4			FBgn0023423	slmb	FBgn0036770	Prestin	FBgn0037440	CG1041	FBgn0038680	Cyp12a5	FBgn0034553	CG9993	FBgn0034606	ASPP	FBgn0013997	Nrx-IV	FBgn0032249	CG5337	FBgn0043783	CG32444			FBgn0051052								FBgn0034381	List	FBgn0031239	CG17075	FBgn0033065	Cyp6w1
												FBgn0030480	Tim9a			FBgn0037443	CG1021	FBgn0023174	Prosbeta2	FBgn0033093	CG3270	FBgn0038681	Cyp12a4	FBgn0034552	CG17999	FBgn0034921	Dcp1	FBgn0000108	Appl	FBgn0031866	neuroligin	FBgn0051221	CG31221			FBgn0036663	CG9674							FBgn0259225	Pde1c	FBgn0029834	CG5937	FBgn0031182	Cyp6t1
												FBgn0033373	CG8080			FBgn0261561	CG42675	FBgn0032433	Oatp33Ea	FBgn0030478	CG1640	FBgn0036449	bmm	FBgn0029843	Nep1	FBgn0053182	Kdm4B	FBgn0014879	Set	FBgn0085409	CG34380	FBgn0000439	Dfd			FBgn0020385	pug							FBgn0014859	Hr38	FBgn0019650	toy	FBgn0015038	Cyp9b1
												FBgn0051858	t-cup			FBgn0038535	alt	FBgn0032435	Oatp33Eb	FBgn0038680	Cyp12a5	FBgn0036837	CG18135	FBgn0011770	Gip	FBgn0026063	KP78b	FBgn0000611	exd	FBgn0053531	Ddr	FBgn0004516	Gad1			FBgn0036262	CG6910							FBgn0028400	Syt4	FBgn0005558	ey	FBgn0033775	Cyp9h1
												FBgn0030663	CG8117			FBgn0025186	ari-2	FBgn0031865	Nha1	FBgn0038681	Cyp12a4	FBgn0034588	CG9394	FBgn0031968	CG7231	FBgn0037490	CG10053	FBgn0000412	D1	FBgn0032338	CG16854	FBgn0005619	Hdc			FBgn0039536	CG18437							FBgn0261090	Sytbeta	FBgn0031814	retm	FBgn0031689	Cyp28d1
																FBgn0031717	Oscillin	FBgn0029913	Cht11	FBgn0036837	CG18135	FBgn0039156	CG6178	FBgn0030737	CG9914	FBgn0034962	MAN1	FBgn0025936	Eph	FBgn0015558	tty	FBgn0050446	Tdc2			FBgn0041194	Prat2							FBgn0039911	CG1909	FBgn0035676	CG6619	FBgn0038236	Cyp313a1
																FBgn0052654	Sec16	FBgn0028932	CG16890	FBgn0034588	CG9394	FBgn0038731	CG11659	FBgn0030518	CG11134	FBgn0261823	Asx	FBgn0036398	CG9007	FBgn0000535	eag	FBgn0031692	TpnC25D			FBgn0026403	Ndg							FBgn0030960	CG7053	FBgn0030558	CG1461	FBgn0030367	Cyp311a1
																FBgn0032078	C1GalTA	FBgn0052557	CG32557	FBgn0039156	CG6178	FBgn0038730	CG6300	FBgn0259977	Tdc1	FBgn0000061	al	FBgn0036811	MED11	FBgn0032264	Lip4	FBgn0015777	nrv2			FBgn0003353	sei							FBgn0011211	blw	FBgn0053296	CG33296	FBgn0053147	Hs3st-A
																FBgn0038619	CG7685	FBgn0036309	Hip1	FBgn0038731	CG11659	FBgn0038734	CG11453	FBgn0032235	CG5096	FBgn0002306	sas	FBgn0025776	ind	FBgn0051871	CG31871	FBgn0032946	nrv3			FBgn0013949	Ela							FBgn0019985	mGluRA	FBgn0260964	Vmat	FBgn0035649	CG10483
																FBgn0029913	Cht11	FBgn0036740	CG6259	FBgn0038730	CG6300	FBgn0035006	CG4563	FBgn0040342	CG3706	FBgn0053196	dp	FBgn0051481	pb	FBgn0039915	CG1732	FBgn0000711	flw			FBgn0011284	RpS4							FBgn0039081	Irk2	FBgn0043005	prt	FBgn0036274	CG4328
																FBgn0035692	CG13298	FBgn0029943	Atg5	FBgn0038734	CG11453	FBgn0037996	CG4830	FBgn0002973	numb	FBgn0031283	CG15880	FBgn0004837	Su(H)	FBgn0259225	Pde1c	FBgn0029761	SK			FBgn0031821	CG9542							FBgn0039908	Asator	FBgn0035329		FBgn0015519	nAcRalpha-7E
																FBgn0261599	RpS29	FBgn0001981	esg	FBgn0035006	CG4563	FBgn0033733	CG8834	FBgn0042104	CG18747	FBgn0028516	ZnT35C	FBgn0260010	rump	FBgn0010905	Spn	FBgn0037913	fabp			FBgn0260753	Pdfr							FBgn0013995	Calx	FBgn0035331	DmsR-1	FBgn0003074	Pgi
																FBgn0261986	RASSF8	FBgn0026718	fu12	FBgn0037996	CG4830	FBgn0034553	CG9993	FBgn0042102	CG18745	FBgn0051860	CG31860	FBgn0031698	Ncoa6	FBgn0028400	Syt4	FBgn0000667	Actn			FBgn0024957	Irp-1B							FBgn0259170	alpha-Man-I	FBgn0052264	CG32264	FBgn0000024	Ace
																FBgn0034138	RpS15	FBgn0039136	CG5902	FBgn0033733	CG8834	FBgn0034552	CG17999	FBgn0042103	CG18746	FBgn0037613	Cks85A	FBgn0031820	DLP	FBgn0038814	CG15923	FBgn0038293	CG6904			FBgn0052549	CG32549							FBgn0002921	Atpalpha	FBgn0260005	wtrw	FBgn0016047	nompA
																FBgn0010747	Srp54k	FBgn0033582	CG9084	FBgn0034553	CG9993	FBgn0029843	Nep1	FBgn0042105	CG18748	FBgn0031753	CG13999	FBgn0003449	snf	FBgn0011277	HLH4C	FBgn0030394	Cpr11A			FBgn0031627	CG15630							FBgn0039830	CG1746	FBgn0259481	Mob2	FBgn0036211	CG5946
																FBgn0029943	Atg5	FBgn0030300	Sk1	FBgn0034552	CG17999	FBgn0011770	Gip	FBgn0037517	CG10086	FBgn0260758	CG42556	FBgn0036915	CG7757	FBgn0259214	PMCA	FBgn0034136	DAT			FBgn0036824	CG3902							FBgn0086348	se	FBgn0020907	Scp2	FBgn0033739	Dyb
																FBgn0031992	CG8498	FBgn0032850	Kua	FBgn0011770	Gip	FBgn0031968	CG7231	FBgn0042101	CG18744	FBgn0032717	CG10600	FBgn0035719	tow	FBgn0019985	mGluRA	FBgn0034789	PIP5K59B			FBgn0000120	Arr1							FBgn0031384	CG4238	FBgn0040281	Aplip1	FBgn0039738	Mgat2
																FBgn0043842	Yeti	FBgn0035811	CG12262	FBgn0031968	CG7231	FBgn0259977	Tdc1	FBgn0037519	CG3014	FBgn0028887	CG3491	FBgn0036734	CG7564	FBgn0037758	CG9467	FBgn0002937	ninaB			FBgn0000121	Arr2							FBgn0038236	Cyp313a1	FBgn0036359	CG14105	FBgn0036043	CG8177
																FBgn0261873	sdt	FBgn0032451	spict	FBgn0030737	CG9914	FBgn0032235	CG5096	FBgn0037520	CG18268	FBgn0005410	sno	FBgn0031760	Tsp26A	FBgn0039908	Asator	FBgn0003076	Pgm			FBgn0030485	CG1998							FBgn0030367	Cyp311a1	FBgn0034135	Syn2	FBgn0016126	CaMKI
																FBgn0005634	zip	FBgn0033075	Pld	FBgn0030518	CG11134	FBgn0015776	nrv1	FBgn0262475	bru-2	FBgn0001235	hth	FBgn0032395	CG6734	FBgn0034976	CG4049					FBgn0036454	CG17839							FBgn0053147	Hs3st-A	FBgn0023510	Rbcn-3B	FBgn0003386	Shaw
																FBgn0259685	crb	FBgn0023001	melt	FBgn0259977	Tdc1	FBgn0040342	CG3706	FBgn0030993	Mec2	FBgn0039251	Trf4-2	FBgn0036725	CG18265	FBgn0013995	Calx					FBgn0087012	5-HT2							FBgn0040377	Vha36-3	FBgn0038877	CG3308	FBgn0026576	CG5991
																FBgn0039136	CG5902	FBgn0033605	CG9067	FBgn0032235	CG5096	FBgn0040299	Myo28B1	FBgn0034488	CG11208	FBgn0261953	AP-2	FBgn0031100	CG1504	FBgn0002921	Atpalpha					FBgn0025391	Scgdelta							FBgn0040793	CG7630	FBgn0032673	CG7180	FBgn0039530	Tusp
																FBgn0046247	CG5938	FBgn0030245	CG1637	FBgn0010423	TpnC47D	FBgn0002973	numb	FBgn0004394	pdm2	FBgn0032229	CG5045	FBgn0051118	RabX4	FBgn0259241	CG42339					FBgn0029768	SPR							FBgn0035649	CG10483	FBgn0053094	Synd	FBgn0040348	CG3703
																FBgn0023001	melt	FBgn0030357	Sclp	FBgn0015776	nrv1	FBgn0042102	CG18745	FBgn0085424	nub	FBgn0260481	CG32454	FBgn0004362	HmgD	FBgn0053147	Hs3st-A					FBgn0037646	CAHbeta							FBgn0036274	CG4328	FBgn0028879	CG15270	FBgn0051116	ClC-a
																FBgn0035767	CG8596	FBgn0000455	Dip-C	FBgn0040342	CG3706	FBgn0042103	CG18746			FBgn0001075	ft	FBgn0020279	lig	FBgn0259150	CG42265					FBgn0039737	CG7920							FBgn0033739	Dyb	FBgn0038975	Nrx-1	FBgn0032382	Mal-B2
																FBgn0000455	Dip-C	FBgn0036820	CG6852	FBgn0042104	CG18747	FBgn0042105	CG18748			FBgn0000497	ds	FBgn0053653	Caps	FBgn0259994	CG42492					FBgn0031500	CG17221							FBgn0039738	Mgat2	FBgn0000108	Appl	FBgn0003965	v
																FBgn0036258	CG5642	FBgn0035154	CG3344	FBgn0042102	CG18745	FBgn0037517	CG10086			FBgn0038381	CG3303	FBgn0028421	Kap3	FBgn0030758	CanA-14F					FBgn0035266	Gk							FBgn0036043	CG8177	FBgn0042138	CG18815	FBgn0085410	TrissinR
																FBgn0050463	CG30463	FBgn0086377	Syx7	FBgn0042103	CG18746	FBgn0042101	CG18744			FBgn0039451	CG6420	FBgn0025639	Hmt4-20	FBgn0052105	CG32105					FBgn0025592	Gyk							FBgn0039530	Tusp	FBgn0026409	Mpcp	FBgn0031770	CG13995
																FBgn0027558	pgant3	FBgn0036411	Sox21a	FBgn0042105	CG18748	FBgn0037519	CG3014			FBgn0015300	Ssl	FBgn0051638	CG31638	FBgn0036274	CG4328					FBgn0001263	inaD							FBgn0037265	CG12001	FBgn0036698	CG7724	FBgn0036680	Cpr73D
																FBgn0000411	D	FBgn0014010	Rab5	FBgn0037517	CG10086	FBgn0037520	CG18268			FBgn0026136	CkIIbeta2	FBgn0035610	Lkr	FBgn0028916	CG33090					FBgn0036759	CG5577							FBgn0051116	ClC-a	FBgn0036146	CG14141	FBgn0004919	gol
																FBgn0014010	Rab5	FBgn0039543	CG12428	FBgn0042101	CG18744	FBgn0262475	bru-2			FBgn0005677	dac	FBgn0000567	Eip74EF	FBgn0015519	nAcRalpha-7E					FBgn0032879	CG9317							FBgn0085410	TrissinR	FBgn0016013	Faa	FBgn0033054	CG14591
																FBgn0261862	whd	FBgn0261862	whd	FBgn0037519	CG3014	FBgn0036575	CG5157			FBgn0033371	CNT1	FBgn0011217	eff	FBgn0037212	nAcRalpha-80B					FBgn0033778	CG3790							FBgn0031770	CG13995	FBgn0015772	Nak	FBgn0041723	rho-5
																FBgn0034366	Atg7	FBgn0053936		FBgn0037520	CG18268	FBgn0046114	Gclm			FBgn0083969	CG34133	FBgn0020496	CtBP	FBgn0004118	nAcRbeta-96A					FBgn0037440	CG1041							FBgn0036680	Cpr73D	FBgn0036116	CG7888	FBgn0038140	CG8784
																FBgn0013718	nuf	FBgn0028689	Rpn6	FBgn0036575	CG5157	FBgn0085424	nub			FBgn0036327	CG10748	FBgn0010583	dock	FBgn0000036	nAcRalpha-96Aa					FBgn0261862	whd							FBgn0004919	gol	FBgn0030707	CG8916	FBgn0038201	Pk1r
																FBgn0250791	Snap	FBgn0033093	CG3270	FBgn0046114	Gclm					FBgn0041191	Rheb	FBgn0039920	CG11360	FBgn0000024	Ace					FBgn0035978	UGP							FBgn0033054	CG14591	FBgn0035756	unc-13-4A	FBgn0029834	CG5937
																FBgn0050344	CG30344	FBgn0015282	Pros26.4	FBgn0034390	CG15093					FBgn0036882	CG9279	FBgn0050389	CG30389	FBgn0016047	nompA					FBgn0030478	CG1640							FBgn0041723	rho-5	FBgn0051481	pb	FBgn0019650	toy
																FBgn0000173	ben	FBgn0016076	vri	FBgn0085424	nub					FBgn0026324	Taf10b	FBgn0031765	CG9109	FBgn0033739	Dyb					FBgn0050158	CG30158							FBgn0038140	CG8784	FBgn0052112	CG32112	FBgn0005558	ey
																FBgn0003660	Syb	FBgn0038681	Cyp12a4							FBgn0243511	psidin	FBgn0028509	cenG1A	FBgn0039738	Mgat2					FBgn0033985	CG10257							FBgn0038201	Pk1r	FBgn0038170	CG14367	FBgn0031814	retm
																FBgn0050390	Sgf29	FBgn0003388	shd							FBgn0035464	CG12006	FBgn0039270	PQBP1	FBgn0085395	Shawl					FBgn0261285	Ppcs							FBgn0031239	CG17075	FBgn0261642	mbl	FBgn0261854	aPKC
																FBgn0051496	CG31496	FBgn0036449	bmm							FBgn0028397	Tob	FBgn0035235	CG7879	FBgn0003386	Shaw					FBgn0034387	Cyp12b2							FBgn0026076	UBL3	FBgn0035719	tow	FBgn0031637	CG2950
																FBgn0040660	CG13551	FBgn0050345	CG30345							FBgn0034753	CG2852	FBgn0031216	CG11376	FBgn0015567						FBgn0039817	CG15553							FBgn0029834	CG5937	FBgn0261698	CG42732	FBgn0030558	CG1461
																FBgn0044452	Atg2	FBgn0030576	CG15890							FBgn0027889	ball	FBgn0085384	CG34355	FBgn0033884	CG13344					FBgn0033387	CG8008							FBgn0019650	toy	FBgn0032507	CG9377	FBgn0035348	CG16758
																FBgn0031566	CG2818	FBgn0000173	ben							FBgn0000099	ap	FBgn0015589	Apc	FBgn0039530	Tusp					FBgn0051321	CG31321							FBgn0005558	ey	FBgn0010350	CdsA	FBgn0041181	TepIII
																FBgn0033665	CG13189	FBgn0003660	Syb							FBgn0027950	MBD-like	FBgn0010240	Lcch3	FBgn0034391	CG15080					FBgn0038818	Nep4							FBgn0035676	CG6619	FBgn0051118	RabX4	FBgn0053296	CG33296
																FBgn0040207	kat80	FBgn0050390	Sgf29							FBgn0037213	CG12581	FBgn0259986	nab	FBgn0015774	NetB					FBgn0259985	Mppe							FBgn0030558	CG1461	FBgn0035538	DopEcR	FBgn0260964	Vmat
																FBgn0035995	CG3529	FBgn0052564	CG32564							FBgn0051742	CG31742	FBgn0038535	alt	FBgn0085410	TrissinR					FBgn0005614	trpl							FBgn0041181	TepIII	FBgn0036279	Ncc69	FBgn0043005	prt
																FBgn0033717	CG8839	FBgn0030541	CG11584							FBgn0032135	GlcAT-S	FBgn0025186	ari-2	FBgn0041723	rho-5					FBgn0011770	Gip							FBgn0013343	Syx1A	FBgn0259234	Camta	FBgn0035331	DmsR-1
																FBgn0024806	DIP2	FBgn0044452	Atg2							FBgn0031357	mRpL48	FBgn0053260	CG33260	FBgn0085387	shakB					FBgn0037239	CG11739							FBgn0260479	CG31904	FBgn0053653	Caps	FBgn0033579	CG13229
																FBgn0036291	CG10681	FBgn0045064	bwa							FBgn0038090	CG10909	FBgn0039282	Bili	FBgn0038140	CG8784					FBgn0043783	CG32444							FBgn0260964	Vmat	FBgn0030887	CG6867	FBgn0039025	CG7023
																FBgn0036518	RhoGAP71E	FBgn0036837	CG18135							FBgn0064119	CG33934	FBgn0037697	CG9363	FBgn0031239	CG17075					FBgn0031428	CG9886							FBgn0043005	prt	FBgn0259178	5PtaseI	FBgn0052264	CG32264
																FBgn0053096	CG33096	FBgn0031566	CG2818							FBgn0260466	Indy-2	FBgn0035692	CG13298	FBgn0086902	kis					FBgn0085437	CG34408							FBgn0035331	DmsR-1	FBgn0038641	CG7708	FBgn0260005	wtrw
																FBgn0039809	CG15547	FBgn0038734	CG11453							FBgn0032314	CG7309	FBgn0051058	CG31058	FBgn0029834	CG5937					FBgn0029870	Marf							FBgn0033579	CG13229	FBgn0037895	CG6723	FBgn0259481	Mob2
																FBgn0043455	CG5986	FBgn0040363	CG11384							FBgn0036180	CG6091	FBgn0034975	enok	FBgn0019650	toy					FBgn0031397	CG15385							FBgn0026616	alpha-Man-IIb	FBgn0029950	CG9657	FBgn0031245	CG3625
																FBgn0033544	CG7220	FBgn0038220	CG12207							FBgn0038134	wntD	FBgn0004587	B52	FBgn0005558	ey					FBgn0000715	Fmrf							FBgn0032479	CG16974	FBgn0035293	CG5687	FBgn0032181	CG13133
																FBgn0039014	CG6982	FBgn0037339	Pi4KIIalpha							FBgn0033069	CG8335	FBgn0015618	Cdk8	FBgn0035676	CG6619					FBgn0259221	CG42321							FBgn0052264	CG32264	FBgn0035170	dpr20	FBgn0040281	Aplip1
																FBgn0028341	l(1)G0232	FBgn0051717	CG31717							FBgn0260634	eIF4G2	FBgn0038165	Task6	FBgn0013343	Syx1A					FBgn0031771	CG9140							FBgn0024251	bbx	FBgn0034286	dpr13	FBgn0030361	CG1492
																FBgn0037465	CG1105	FBgn0035995	CG3529							FBgn0085337	CG34308	FBgn0001981	esg	FBgn0261671	tweek					FBgn0032286	CG7300							FBgn0260005	wtrw	FBgn0032233	dpr19	FBgn0036359	CG14105
																FBgn0262475	bru-2	FBgn0034577	cpa							FBgn0038125	CG8141	FBgn0001983	wor	FBgn0260858	Ykt6					FBgn0038858	CG5793							FBgn0259481	Mob2	FBgn0085414	dpr12	FBgn0023510	Rbcn-3B
																FBgn0001942	eIF-4a	FBgn0033717	CG8839							FBgn0037608	mRpL19	FBgn0003448	sna	FBgn0035329						FBgn0023169	SNF1A							FBgn0020907	Scp2	FBgn0038282	dpr9	FBgn0038877	CG3308
																FBgn0031950	Herp	FBgn0037293	CG12007							FBgn0011569	can	FBgn0003300	run	FBgn0035331	DmsR-1					FBgn0034390	CG15093							FBgn0040281	Aplip1	FBgn0260995	CG42596	FBgn0032673	CG7180
																FBgn0004868	Gdi	FBgn0035679	CG10467							FBgn0003396	shn	FBgn0020379	Rfx	FBgn0026616	alpha-Man-IIb					FBgn0002937	ninaB							FBgn0039112	CG10219	FBgn0052057	dpr10	FBgn0053094	Synd
																FBgn0020249	stck	FBgn0036136	Ufd1-like							FBgn0033166	Eaf	FBgn0030421	CG3812	FBgn0052264	CG32264					FBgn0003076	Pgm							FBgn0036359	CG14105	FBgn0053512	dpr4	FBgn0028879	CG15270
																FBgn0005649	Rox8	FBgn0036291	CG10681							FBgn0000576	ems	FBgn0260938	tay	FBgn0262582	cic													FBgn0034135	Syn2	FBgn0053481	dpr7	FBgn0038975	Nrx-1
																FBgn0036621	roq	FBgn0039732	CG15525							FBgn0008646	E5	FBgn0011481	Ssdp	FBgn0001229	Hsp67Bc													FBgn0023510	Rbcn-3B	FBgn0040726	dpr	FBgn0052068	CG32068
																FBgn0033463	CG1513	FBgn0033495	CG12214							FBgn0051211	CG31211	FBgn0031725	CG14010	FBgn0001227	Hsp67Ba													FBgn0001098	Gdh	FBgn0001624	dlg1	FBgn0042138	CG18815
																FBgn0030183	CG15309	FBgn0051694	CG31694							FBgn0026479	Drp1	FBgn0036544	sff	FBgn0015609	CadN													FBgn0037084	Syx6	FBgn0261262	CG42613	FBgn0036698	CG7724
																FBgn0026749	Yippee	FBgn0037116	CG7158							FBgn0034822	RpL37b	FBgn0025625	Sik2	FBgn0262018	CadN2													FBgn0032673	CG7180	FBgn0085431	CG34402	FBgn0037637	CG9836
																FBgn0010704	l(2)s5379	FBgn0032235	CG5096							FBgn0010768	sqz	FBgn0032813	CG10262	FBgn0037963	Cad87A													FBgn0053094	Synd	FBgn0085426	Rgk3	FBgn0036146	CG14141
																FBgn0030735	CG3632	FBgn0035981	CG4452							FBgn0037964	CG14731	FBgn0000581	E(Pc)	FBgn0039294	Cad96Cb													FBgn0028879	CG15270	FBgn0036663	CG9674	FBgn0036145	CG7607
																FBgn0016984	sktl	FBgn0028690	Rpn5							FBgn0031465	CG3123	FBgn0262139	trh	FBgn0033987	ckn													FBgn0038975	Nrx-1	FBgn0039282	Bili	FBgn0016013	Faa
																		FBgn0033544	CG7220							FBgn0032967	CG1428	FBgn0003520	stau	FBgn0040281	Aplip1													FBgn0000108	Appl	FBgn0042696	NfI	FBgn0015772	Nak
																		FBgn0035632	Ppat-Dpck							FBgn0032964	CG11630	FBgn0001965	Sos	FBgn0034070	SP2353													FBgn0042138	CG18815	FBgn0039536	CG18437	FBgn0036116	CG7888
																		FBgn0261985	Ptpmeg							FBgn0051933	CG31933	FBgn0037120	CG11247	FBgn0030361	CG1492													FBgn0036698	CG7724	FBgn0028699	Rh50	FBgn0030707	CG8916
																		FBgn0042102	CG18745							FBgn0032338	CG16854	FBgn0028481	CG4341	FBgn0034135	Syn2													FBgn0031066	CoVIb	FBgn0003353	sei	FBgn0003748	Treh
																		FBgn0042103	CG18746							FBgn0011206	bol	FBgn0051690	CG31690	FBgn0031955	CG14535													FBgn0036146	CG14141	FBgn0037690	Task7	FBgn0035756	unc-13-4A
																		FBgn0042105	CG18748							FBgn0031208	CG11023	FBgn0046704	Liprin-alpha	FBgn0032225	CG5022													FBgn0016013	Faa	FBgn0039040	CG13833	FBgn0051481	pb
																		FBgn0037517	CG10086							FBgn0027603	Ulp1	FBgn0000411	D	FBgn0086408	stl													FBgn0003141	pr	FBgn0260753	Pdfr	FBgn0052112	CG32112
																		FBgn0036575	CG5157							FBgn0052110	CG32110	FBgn0010280	Taf4	FBgn0261341	verm													FBgn0015772	Nak	FBgn0039349	Ssadh	FBgn0035231	Cct2
																		FBgn0030993	Mec2							FBgn0261395	Prosalpha3T	FBgn0030474	CG15747	FBgn0028879	CG15270													FBgn0036116	CG7888	FBgn0004575	Syn	FBgn0038170	CG14367
																		FBgn0032000	CG8372							FBgn0050177	CG30177	FBgn0052944	CG32944	FBgn0038975	Nrx-1													FBgn0030707	CG8916	FBgn0050021	metro	FBgn0034117	CG7997
																		FBgn0028692	Rpn2							FBgn0030313	CG11697	FBgn0003575	su(s)	FBgn0000108	Appl													FBgn0035756	unc-13-4A	FBgn0261873	sdt	FBgn0031815	frj
																		FBgn0029820	CG16721							FBgn0037121	Rpb8	FBgn0000449	dib	FBgn0039255	CG13646													FBgn0051481	pb	FBgn0034418	CG15118	FBgn0035719	tow
																		FBgn0034488	CG11208							FBgn0015829	TfIIEbeta	FBgn0015778	rin	FBgn0030707	CG8916													FBgn0052112	CG32112	FBgn0029137	Patsas	FBgn0031318	CG4887
																		FBgn0030183	CG15309							FBgn0023495	Lip3	FBgn0002783	mor	FBgn0035756	unc-13-4A													FBgn0038170	CG14367	FBgn0030421	CG3812	FBgn0261698	CG42732
																		FBgn0026749	Yippee							FBgn0031934	Ntl	FBgn0003425		FBgn0025936	Eph													FBgn0261642	mbl	FBgn0033426	CG1814	FBgn0032507	CG9377
																		FBgn0033886	CG13349							FBgn0032292	CG6750	FBgn0000529	bsh	FBgn0051481	pb													FBgn0031815	frj	FBgn0039617	CG14521	FBgn0033321	CG8738
																		FBgn0030735	CG3632							FBgn0014870	Psi	FBgn0051224	CG31224	FBgn0261642	mbl													FBgn0035719	tow	FBgn0051646	CG31646	FBgn0037627	CG13318
																		FBgn0039747	AdoR							FBgn0051249	CG31249	FBgn0015907	bl	FBgn0052354	CG32354													FBgn0039269	veli	FBgn0031627	CG15630	FBgn0010350	CdsA
																		FBgn0085424	nub							FBgn0032664	CG5755	FBgn0021873	Gef26	FBgn0250788	beta-Spec													FBgn0261698	CG42732	FBgn0000120	Arr1	FBgn0036939	CG7365
																										FBgn0031623	Taf12L	FBgn0024189	sns	FBgn0058196	Maf1													FBgn0036725	CG18265	FBgn0052683	CG32683	FBgn0039094	CG10184
																										FBgn0032447	PICK1	FBgn0029082	hbs	FBgn0039217	CG13627													FBgn0032507	CG9377	FBgn0000121	Arr2	FBgn0036255	Atg12
																										FBgn0038773	CG10887	FBgn0010762	simj	FBgn0035719	tow													FBgn0010350	CdsA	FBgn0036454	CG17839	FBgn0019830	colt
																										FBgn0036761	MED19	FBgn0020378	Sp1	FBgn0035936	Tsp66E													FBgn0036939	CG7365	FBgn0036544	sff	FBgn0050295	Ipk1
																										FBgn0031460	CG15399	FBgn0000606	eve	FBgn0031760	Tsp26A													FBgn0051118	RabX4	FBgn0087012	5-HT2	FBgn0033464	CG1441
																										FBgn0027596	CG10249	FBgn0001319	kn	FBgn0039269	veli													FBgn0004507	GlyP	FBgn0004514	Oct-TyrR	FBgn0036279	Ncc69
																										FBgn0031585	CG2955	FBgn0024179	wit	FBgn0261698	CG42732													FBgn0035538	DopEcR	FBgn0029768	SPR	FBgn0053653	Caps
																										FBgn0051907	CG31907	FBgn0027548	nito	FBgn0036725	CG18265													FBgn0033464	CG1441	FBgn0003520	stau	FBgn0028421	Kap3
																										FBgn0030191	CG15306	FBgn0024806	DIP2	FBgn0031100	CG1504													FBgn0036279	Ncc69	FBgn0051119	HdacX	FBgn0034951	CG3860
																										FBgn0032214	CG4968	FBgn0036450	CG13472	FBgn0036612	CG4998													FBgn0259234	Camta	FBgn0028481	CG4341	FBgn0030887	CG6867
																										FBgn0026371	SAK	FBgn0004595	pros	FBgn0261914														FBgn0053653	Caps	FBgn0001263	inaD	FBgn0031765	CG9109
																										FBgn0042085	Bap170	FBgn0039732	CG15525	FBgn0039075	CG4393													FBgn0028421	Kap3	FBgn0032879	CG9317	FBgn0038641	CG7708
																										FBgn0030377	CG1924	FBgn0001139	gro	FBgn0037956	CG6959													FBgn0034951	CG3860	FBgn0260866	dnr1	FBgn0037895	CG6723
																										FBgn0030755		FBgn0261238	Alh	FBgn0051118	RabX4													FBgn0023531	CG32809	FBgn0050158	CG30158	FBgn0029950	CG9657
																										FBgn0003321	sbr	FBgn0260749	Utx	FBgn0034145	CG5065													FBgn0031765	CG9109	FBgn0033985	CG10257	FBgn0035293	CG5687
																										FBgn0051501	nxf4	FBgn0037913	fabp	FBgn0001123	G-salpha60A													FBgn0038641	CG7708	FBgn0086359	Invadolysin	FBgn0035170	dpr20
																										FBgn0031441	CG9962	FBgn0000715	Fmrf	FBgn0053653	Caps													FBgn0037895	CG6723	FBgn0016076	vri	FBgn0085414	dpr12
																										FBgn0037325	CG12147	FBgn0026597	Axn	FBgn0051638	CG31638													FBgn0029950	CG9657	FBgn0250791	Snap	FBgn0260995	CG42596
																										FBgn0015283	Pros54	FBgn0037519	CG3014	FBgn0035610	Lkr													FBgn0032233	dpr19	FBgn0034387	Cyp12b2	FBgn0037908	dpr5
																										FBgn0033326	CG14743	FBgn0262350		FBgn0030887	CG6867													FBgn0085414	dpr12	FBgn0013342	n-syb	FBgn0053512	dpr4
																										FBgn0033324	CG14744	FBgn0028993	scro	FBgn0259923	2013-09-04													FBgn0037295	dpr16	FBgn0002774	mle	FBgn0053481	dpr7
																										FBgn0034156	CG5348	FBgn0037466	CG1965	FBgn0010583	dock													FBgn0037993	dpr15	FBgn0038733	CG11407	FBgn0261871	dpr2
																										FBgn0033323	CG12376	FBgn0004873		FBgn0023531	CG32809													FBgn0038282	dpr9	FBgn0038732	CG11391	FBgn0023477	Tal
																										FBgn0033599	CG13223	FBgn0085391	CG34362	FBgn0039920	CG11360													FBgn0052600	dpr8	FBgn0000529	bsh	FBgn0261262	CG42613
																										FBgn0085191	CG34162	FBgn0005649	Rox8	FBgn0259178	5PtaseI													FBgn0037908	dpr5	FBgn0029843	Nep1	FBgn0085431	CG34402
																										FBgn0042650	disco-r	FBgn0031883	CG11266	FBgn0050389	CG30389													FBgn0053512	dpr4	FBgn0038818	Nep4	FBgn0036663	CG9674
																										FBgn0004915	TfIIB	FBgn0052406	CG32406	FBgn0031765	CG9109													FBgn0261871	dpr2	FBgn0022361	Pur-alpha	FBgn0039282	Bili
																										FBgn0035907	CG6662	FBgn0000283	Cp190	FBgn0028509	cenG1A													FBgn0010240	Lcch3	FBgn0259985	Mppe	FBgn0042696	NfI
																										FBgn0031688	Cyp28d2	FBgn0027499	wde	FBgn0035170	dpr20													FBgn0001624	dlg1	FBgn0003861	trp	FBgn0037697	CG9363
																										FBgn0028667	Vha16-3	FBgn0086899	tlk	FBgn0030723	dpr18													FBgn0261262	CG42613	FBgn0005614	trpl	FBgn0036262	CG6910
																										FBgn0032294	Vha16-5	FBgn0024184	unc-4	FBgn0034286	dpr13													FBgn0034797	nahoda	FBgn0027356	Amph	FBgn0039536	CG18437
																										FBgn0262513	Vha16-4	FBgn0035357	MEP-1	FBgn0032233	dpr19													FBgn0034618	CG9485	FBgn0024189	sns	FBgn0028699	Rh50
																										FBgn0035534	mRpS6	FBgn0030600	hiw	FBgn0029974	dpr14													FBgn0036663	CG9674	FBgn0029935	CG4615	FBgn0038397	CG10185
																										FBgn0032827	CG10481	FBgn0039734	Tace	FBgn0085414	dpr12													FBgn0039282	Bili	FBgn0034446	CG7735	FBgn0003353	sei
																										FBgn0029679	CG2901	FBgn0000414	Dab	FBgn0037295	dpr16													FBgn0042696	NfI	FBgn0261722	fwe	FBgn0037917	wkd
																										FBgn0032251	CG13142	FBgn0010323	Gsc	FBgn0037993	dpr15													FBgn0039536	CG18437	FBgn0024179	wit	FBgn0037690	Task7
																										FBgn0039518	CG13978	FBgn0051140	CG31140	FBgn0051361	dpr17													FBgn0051058	CG31058	FBgn0051221	CG31221	FBgn0031821	CG9542
																										FBgn0039010	CG4907	FBgn0034789	PIP5K59B	FBgn0053202	dpr11													FBgn0028699	Rh50	FBgn0033196	CG1358	FBgn0039040	CG13833
																										FBgn0037915	CG6790			FBgn0038282	dpr9													FBgn0031912	CG5261	FBgn0000439	Dfd	FBgn0039349	Ssadh
																										FBgn0037916	CG5342			FBgn0052600	dpr8													FBgn0003353	sei	FBgn0004516	Gad1	FBgn0004575	Syn
																										FBgn0033479	CG2292			FBgn0260995	CG42596													FBgn0037690	Task7	FBgn0005619	Hdc	FBgn0034622	CG15666
																										FBgn0027341	Gfat1			FBgn0040823	dpr6													FBgn0038165	Task6	FBgn0050446	Tdc2	FBgn0050021	metro
																										FBgn0001987	Gli			FBgn0052057	dpr10													FBgn0085425	CG34396	FBgn0032946	nrv3	FBgn0034418	CG15118
																										FBgn0039852	nyo			FBgn0037908	dpr5													FBgn0031821	CG9542	FBgn0000711	flw	FBgn0029137	Patsas
																										FBgn0039704	neo			FBgn0053512	dpr4													FBgn0039040	CG13833	FBgn0029761	SK	FBgn0033426	CG1814
																										FBgn0029158	Las			FBgn0053481	dpr7													FBgn0260753	Pdfr	FBgn0037521	CG2993	FBgn0031485	CG9643
																										FBgn0001324	kto			FBgn0053516	dpr3													FBgn0039349	Ssadh	FBgn0262350		FBgn0031725	CG14010
																										FBgn0033865	CG6220			FBgn0261871	dpr2													FBgn0004575	Syn	FBgn0037466	CG1965	FBgn0031627	CG15630
																										FBgn0040075	rept			FBgn0040726	dpr													FBgn0050021	metro	FBgn0260657	CG42540	FBgn0036824	CG3902
																										FBgn0036510	CG7427			FBgn0031216	CG11376													FBgn0261873	sdt	FBgn0031883	CG11266	FBgn0000120	Arr1
																										FBgn0052461	CG32461			FBgn0036732	Oatp74D													FBgn0029137	Patsas	FBgn0259221	CG42321	FBgn0052683	CG32683
																										FBgn0032368	spag4			FBgn0036485	FucTA													FBgn0030421	CG3812	FBgn0052406	CG32406	FBgn0000121	Arr2
																										FBgn0038519	Prx3			FBgn0029807	CG3108													FBgn0033426	CG1814	FBgn0033463	CG1513	FBgn0030485	CG1998
																										FBgn0033294	Mal-A4			FBgn0085384	CG34355													FBgn0052791	CG32791	FBgn0034136	DAT	FBgn0046247	CG5938
																										FBgn0015773	NetA			FBgn0015589	Apc													FBgn0039617	CG14521	FBgn0017581	Lk6	FBgn0036454	CG17839
																										FBgn0031979	CG7429			FBgn0010240	Lcch3													FBgn0051708	CG31708	FBgn0030600	hiw	FBgn0030245	CG1637
																										FBgn0034657	LBR			FBgn0001624	dlg1													FBgn0031725	CG14010	FBgn0028497	CG3530	FBgn0087012	5-HT2
																										FBgn0027108	inx2			FBgn0261262	CG42613													FBgn0051646	CG31646	FBgn0000414	Dab	FBgn0029768	SPR
																										FBgn0028373	inx3			FBgn0085431	CG34402													FBgn0051814	CG31814	FBgn0051140	CG31140	FBgn0003520	stau
																										FBgn0027107	inx6			FBgn0085426	Rgk3													FBgn0031627	CG15630	FBgn0034789	PIP5K59B	FBgn0037646	CAHbeta
																										FBgn0000625	eyg			FBgn0039282	Bili													FBgn0000120	Arr1	FBgn0024963	GluClalpha	FBgn0051119	HdacX
																										FBgn0037220	CG14641			FBgn0042696	NfI													FBgn0052683	CG32683	FBgn0002937	ninaB	FBgn0039737	CG7920
																										FBgn0034837	RpL22-like			FBgn0035179	CG12038													FBgn0000121	Arr2			FBgn0028481	CG4341
																										FBgn0033177	CG11141			FBgn0035398	Cht7													FBgn0030485	CG1998			FBgn0035266	Gk
																										FBgn0024330	MED6			FBgn0039536	CG18437													FBgn0036454	CG17839			FBgn0025592	Gyk
																										FBgn0034401	CG15100			FBgn0051058	CG31058													FBgn0036544	sff			FBgn0001263	inaD
																										FBgn0030625	CG5877			FBgn0259240	Ten-a													FBgn0087012	5-HT2			FBgn0036759	CG5577
																										FBgn0036763	CG7441			FBgn0037690	Task7													FBgn0025391	Scgdelta			FBgn0036760	CG5567
																										FBgn0039331	CG11913			FBgn0038165	Task6													FBgn0262139	trh			FBgn0032879	CG9317
																										FBgn0034827	Klp59D			FBgn0004575	Syn													FBgn0003520	stau			FBgn0033778	CG3790
																										FBgn0037342	CG2931			FBgn0050021	metro													FBgn0028481	CG4341			FBgn0050158	CG30158
																										FBgn0040208	Kat60			FBgn0029137	Patsas													FBgn0037891	CG5214			FBgn0033985	CG10257
																										FBgn0260484	HIP			FBgn0030421	CG3812													FBgn0001263	inaD			FBgn0086359	Invadolysin
																										FBgn0029676	HIP-R			FBgn0039928	cals													FBgn0032879	CG9317			FBgn0052944	CG32944
																										FBgn0259198	CG42302			FBgn0052791	CG32791													FBgn0033778	CG3790			FBgn0261285	Ppcs
																										FBgn0039379	CG5886			FBgn0259245	CG42343													FBgn0038617	CG12333			FBgn0034387	Cyp12b2
																										FBgn0004898	fd96Cb			FBgn0039617	CG14521													FBgn0260866	dnr1			FBgn0039817	CG15553
																										FBgn0004897	fd96Ca			FBgn0058378	CG40378													FBgn0050158	CG30158			FBgn0033387	CG8008
																										FBgn0026160	tna			FBgn0085420	CG34391													FBgn0033985	CG10257			FBgn0051321	CG31321
																										FBgn0015014				FBgn0051708	CG31708													FBgn0086359	Invadolysin			FBgn0013342	n-syb
																										FBgn0042693	PP2A-B'			FBgn0031725	CG14010													FBgn0261285	Ppcs			FBgn0002774	mle
																										FBgn0052568	CG32568			FBgn0051646	CG31646													FBgn0016076	vri			FBgn0032685	CG10211
																										FBgn0036090	CG8009			FBgn0051814	CG31814													FBgn0250791	Snap			FBgn0034588	CG9394
																										FBgn0028931	CG16863			FBgn0053543	CG33543													FBgn0034387	Cyp12b2			FBgn0038733	CG11407
																										FBgn0028648	mRpL50			FBgn0031627	CG15630													FBgn0013342	n-syb			FBgn0038732	CG11391
																										FBgn0000179	bi			FBgn0052683	CG32683													FBgn0010808	l(3)03670			FBgn0000529	bsh
																										FBgn0261963	mid			FBgn0039883	RhoGAP100F													FBgn0051626	CG31626			FBgn0029843	Nep1
																										FBgn0016660	H15			FBgn0036544	sff													FBgn0034588	CG9394			FBgn0038818	Nep4
																										FBgn0001225	Hsp26			FBgn0025625	Sik2													FBgn0038733	CG11407			FBgn0259985	Mppe
																										FBgn0036715	Cad74A			FBgn0032813	CG10262													FBgn0038732	CG11391			FBgn0005614	trpl
																										FBgn0030503	Tango2			FBgn0004514	Oct-TyrR													FBgn0000529	bsh			FBgn0024189	sns
																										FBgn0003892	ptc			FBgn0025391	Scgdelta													FBgn0029843	Nep1			FBgn0034446	CG7735
																										FBgn0083940	CG34104			FBgn0028481	CG4341													FBgn0038818	Nep4			FBgn0037643	skap
																										FBgn0029993	CG1571			FBgn0051690	CG31690													FBgn0022361	Pur-alpha			FBgn0043783	CG32444
																										FBgn0035799	CG14838			FBgn0038324	CG5038													FBgn0259985	Mppe			FBgn0024179	wit
																										FBgn0035100				FBgn0000411	D													FBgn0003861	trp			FBgn0033815	CG4676
																										FBgn0034566	CG9313			FBgn0050158	CG30158													FBgn0005614	trpl			FBgn0051221	CG31221
																										FBgn0053499	Sdic4			FBgn0086359	Invadolysin													FBgn0047038	CG6463			FBgn0033196	CG1358
																										FBgn0067861	Sdic1			FBgn0052944	CG32944													FBgn0027356	Amph			FBgn0085437	CG34408
																										FBgn0003654	sw			FBgn0000229	bsk													FBgn0029935	CG4615			FBgn0000439	Dfd
																										FBgn0052823	Sdic3			FBgn0250791	Snap													FBgn0034446	CG7735			FBgn0050446	Tdc2
																										FBgn0053497	Sdic2			FBgn0013342	n-syb													FBgn0261722	fwe			FBgn0029870	Marf
																										FBgn0261872	scaf6			FBgn0052635	Neto													FBgn0024179	wit			FBgn0000711	flw
																										FBgn0033987	ckn			FBgn0040271	Sulf1													FBgn0051221	CG31221			FBgn0031397	CG15385
																										FBgn0051957	CG31957			FBgn0003425														FBgn0033196	CG1358			FBgn0029761	SK
																										FBgn0038808	Srp14			FBgn0000529	bsh													FBgn0261611	CG42700			FBgn0000715	Fmrf
																										FBgn0015793	Rab-RP3			FBgn0032593	trpgamma													FBgn0000439	Dfd			FBgn0037521	CG2993
																										FBgn0032863	cdc23			FBgn0024189	sns													FBgn0032129	jp			FBgn0037466	CG1965
																										FBgn0013809	Dhc16F			FBgn0029082	hbs													FBgn0004516	Gad1			FBgn0259821	CG42402
																										FBgn0035581	CG17150			FBgn0051774	fred													FBgn0005619	Hdc			FBgn0259221	CG42321
																										FBgn0013811	Dhc62B			FBgn0262509	nrm													FBgn0050446	Tdc2			FBgn0052406	CG32406
																										FBgn0004049	yrt			FBgn0261722	fwe													FBgn0031692	TpnC25D			FBgn0031771	CG9140
																										FBgn0030975	CG7349			FBgn0036843	CG6812													FBgn0015777	nrv2			FBgn0032286	CG7300
																										FBgn0261341	verm			FBgn0000606	eve													FBgn0032946	nrv3			FBgn0034136	DAT
																										FBgn0052499	Cda4			FBgn0001319	kn													FBgn0000711	flw			FBgn0038858	CG5793
																										FBgn0030870	CG6398			FBgn0024179	wit													FBgn0029761	SK			FBgn0017581	Lk6
																										FBgn0011640	lark			FBgn0261555	CG42673													FBgn0037521	CG2993			FBgn0030600	hiw
																										FBgn0259741	CG42395			FBgn0038880	SIFR													FBgn0262350				FBgn0028497	CG3530
																										FBgn0020307	dve			FBgn0024806	DIP2													FBgn0028993	scro			FBgn0039734	Tace
																										FBgn0020261	pcm			FBgn0033815	CG4676													FBgn0260657	CG42540			FBgn0000414	Dab
																										FBgn0038488	m-cup			FBgn0051221	CG31221													FBgn0085383	CG34354			FBgn0034789	PIP5K59B
																										FBgn0032707	CG10348			FBgn0004595	pros													FBgn0259221	CG42321			FBgn0002937	ninaB
																										FBgn0013997	Nrx-IV			FBgn0004619	Glu-RI													FBgn0052406	CG32406
																										FBgn0015562	veg			FBgn0050446	Tdc2													FBgn0053993	CG33993
																										FBgn0062449	CG13197			FBgn0261238	Alh													FBgn0030394	Cpr11A
																										FBgn0038280	CG14861			FBgn0032946	nrv3													FBgn0034136	DAT
																										FBgn0032660	elfless			FBgn0034046	tun													FBgn0053556	form3
																										FBgn0262360	CG43058			FBgn0029761	SK													FBgn0030600	hiw
																										FBgn0037384	dgrn			FBgn0041604	dlp													FBgn0028497	CG3530
																										FBgn0027360	Tim10			FBgn0037521	CG2993													FBgn0000414	Dab
																										FBgn0010638	Sec61beta			FBgn0262350														FBgn0051140	CG31140
																										FBgn0002842	sa			FBgn0038755	Hs6st													FBgn0034789	PIP5K59B
																										FBgn0035754	MED4			FBgn0035625	Blimp-1													FBgn0250785	vari
																										FBgn0000412	D1			FBgn0028993	scro													FBgn0004244	Rdl
																										FBgn0052081	CG32081			FBgn0037466	CG1965													FBgn0002937	ninaB
																										FBgn0033572	CG12943			FBgn0260657	CG42540
																										FBgn0261479	nero			FBgn0004873
																										FBgn0061197	SIP2			FBgn0259821	CG42402
																										FBgn0030207	CG2887			FBgn0085391	CG34362
																										FBgn0050491	CG30491			FBgn0085383	CG34354
																										FBgn0036398	CG9007			FBgn0052406	CG32406
																										FBgn0015075	Ddx1			FBgn0027499	wde
																										FBgn0260010	rump			FBgn0034136	DAT
																										FBgn0031820	DLP			FBgn0086899	tlk
																										FBgn0039875	sip3			FBgn0024184	unc-4
																										FBgn0031343	CG18131			FBgn0030600	hiw
																										FBgn0035988	CG3982			FBgn0039734	Tace
																										FBgn0033834	CG4744			FBgn0000414	Dab
																										FBgn0036734	CG7564			FBgn0051140	CG31140
																										FBgn0034422	CG7137			FBgn0034789	PIP5K59B
																										FBgn0035491	Dpy-30L2			FBgn0024963	GluClalpha
																										FBgn0032293	Dpy-30L1			FBgn0004244	Rdl
																										FBgn0037956	CG6959
																										FBgn0038221	CG3259
																										FBgn0022768	Pp2C1
																										FBgn0039421	CG6036
																										FBgn0061515	endos
																										FBgn0034243	ns2
																										FBgn0034440	CG10073
																										FBgn0023519	mRpL16
																										FBgn0262573
																										FBgn0036897	CG8786
																										FBgn0036568	CG5389
																										FBgn0033191	CG1598
																										FBgn0035519	CG1309
																										FBgn0250904	CG34434
																										FBgn0001311	kkv
																										FBgn0038145	Droj2
																										FBgn0041585	olf186-F
																										FBgn0039270	PQBP1
																										FBgn0003410	sina
																										FBgn0037295	dpr16
																										FBgn0051361	dpr17
																										FBgn0029812	Prosbeta2R1
																										FBgn0037296	Prosbeta2R2
																										FBgn0035217	FucTD
																										FBgn0001321	knk
																										FBgn0051682	Tengl1
																										FBgn0037857	Tengl4
																										FBgn0035141	Cypl
																										FBgn0259986	nab
																										FBgn0035638	Tektin-C
																										FBgn0022943	Cbp20
																										FBgn0005386	ash1
																										FBgn0033274	CG14757
																										FBgn0031094	CG9578
																										FBgn0052727	CG32727
																										FBgn0036580	PDCD-5
																										FBgn0054056	CG34056
																										FBgn0031469	CG18558
																										FBgn0051528	CG31528
																										FBgn0261972
																										FBgn0033716	Den1
																										FBgn0032522	CG16848
																										FBgn0038619	CG7685
																										FBgn0030120	CG17440
																										FBgn0031513	CG3347
																										FBgn0039585	CG1894
																										FBgn0034970	yki
																										FBgn0004587	B52
																										FBgn0036505	CG7945
																										FBgn0033309	CG8735
																										FBgn0036685	CG6664
																										FBgn0030242	sofe
																										FBgn0262514	VhaPPA1-2
																										FBgn0035891	Oseg1
																										FBgn0003517	sta
																										FBgn0010747	Srp54k
																										FBgn0001981	esg
																										FBgn0038626	CG7691
																										FBgn0031155	CG15446
																										FBgn0038013	CG10038
																										FBgn0020379	Rfx
																										FBgn0039558	CG4980
																										FBgn0031879	uif
																										FBgn0032754	CG10700
																										FBgn0032850	Kua
																										FBgn0030485	CG1998
																										FBgn0046247	CG5938
																										FBgn0039425	CG5432
																										FBgn0038630	CG14305
																										FBgn0023001	melt
																										FBgn0032813	CG10262
																										FBgn0259742	CG42360
																										FBgn0262139	trh
																										FBgn0039553	CG5017
																										FBgn0033673	CG8298
																										FBgn0034713	CG11291
																										FBgn0037143	CG7448
																										FBgn0000411	D
																										FBgn0031822	CG9548
																										FBgn0031188	CG14613
																										FBgn0012058	Cdc27
																										FBgn0259211	grh
																										FBgn0004583	ex
																										FBgn0032290	CG6443
																										FBgn0036153	CG7573
																										FBgn0050462	ste24c
																										FBgn0032471	CG5122
																										FBgn0038722	Nup58
																										FBgn0039403	Sld5
																										FBgn0043010	Fsn
																										FBgn0020412	JIL-1
																										FBgn0039817	CG15553
																										FBgn0035399	CG14955
																										FBgn0028913	CG3473
																										FBgn0028789	Doc1
																										FBgn0035954	Doc3
																										FBgn0035956	Doc2
																										FBgn0052564	CG32564
																										FBgn0051626	CG31626
																										FBgn0013764	Chi
																										FBgn0052971	CG32971
																										FBgn0040397	CG3655
																										FBgn0038220	CG12207
																										FBgn0050354	CG30354
																										FBgn0035965	Use1
																										FBgn0021873	Gef26
																										FBgn0029082	hbs
																										FBgn0000547	ed
																										FBgn0002791	mr
																										FBgn0010762	simj
																										FBgn0030645	CG6308
																										FBgn0020378	Sp1
																										FBgn0000606	eve
																										FBgn0039129	RpS19b
																										FBgn0030525	CG10996
																										FBgn0052445	CG32445
																										FBgn0261555	CG42673
																										FBgn0035437	CG11526
																										FBgn0039368	CG17196
																										FBgn0039369	CG17195
																										FBgn0036670	CG13029
																										FBgn0039367	CG17197
																										FBgn0039370	CG4956
																										FBgn0033815	CG4676
																										FBgn0031296	CG4415
																										FBgn0037773	CG5359
																										FBgn0052246	CG32246
																										FBgn0050410	Rpi
																										FBgn0011596	fzo
																										FBgn0039127	CG13602
																										FBgn0032677	CG5790
																										FBgn0026597	Axn
																										FBgn0041604	dlp
																										FBgn0002973	numb
																										FBgn0035103	Vdup1
																										FBgn0035625	Blimp-1
																										FBgn0036809	CG12477
																										FBgn0030578	CG5347
																										FBgn0030577	CG5334
																										FBgn0039651	CG14508
																										FBgn0037986	CG14736
																										FBgn0250821	CG14644
																										FBgn0054039	CG34039
																										FBgn0023212	Elongin-B
																										FBgn0053993	CG33993
																										FBgn0034251	CG11423
																										FBgn0259199	CG42303
																										FBgn0030624	CG9106
																										FBgn0014342	mia
																										FBgn0029667	Gas8
																										FBgn0038200	CG9920
																										FBgn0037689	CG8135
																										FBgn0033886	CG13349
																										FBgn0029745	CG6789
																										FBgn0024184	unc-4
																										FBgn0026058	OdsH
																										FBgn0020371	Tim17b2
																										FBgn0037310	Tim17b1
																										FBgn0033460	sec24
																										FBgn0250785	vari
																										FBgn0004394	pdm2
																										FBgn0085424	nub
																										FBgn0030663	CG8117
































































































































































































































































































































































[truncated: 46 more columns]

## Sheet: worm stage-associated genes
EE_50-0		EE_50-30		EE_50-60		EE_50-90		EE_50-120		EE_50-150		EE_50-180		EE_50-210		EE_50-240		EE_50-300		EE_50-330		EE_50-360		EE_50-390		EE_50-420		EE_50-450		EE_50-480		EE_50-510		EE_50-540		EE_50-570		EE_50-600		EE_50-630		EE_50-660		EE_50-690		EE_50-720		L1
ID	Name	ID	Name	ID	Name	ID	Name	ID	Name	ID	Name	ID	Name	ID	Name	ID	Name	ID	Name	ID	Name	ID	Name	ID	Name	ID	Name	ID	Name	ID	Name	ID	Name	ID	Name	ID	Name	ID	Name	ID	Name	ID	Name	ID	Name	ID	Name	ID	Name
T03F6.5	lis-1	T05G5.3	cdk-1	T05G5.3	cdk-1	T05G5.3	cdk-1	T05G5.3	cdk-1	B0272.2	memb-1	Y37D8A.10	hpo-21	F15D4.3	rmo-1	Y37D8A.10	hpo-21	F23B12.7	F23B12.7	ZK1058.2	pat-3	F18E2.3	scc-3	F18E2.3	scc-3	K02B9.4	elt-3	K02B9.4	elt-3	K02B9.4	elt-3	K02B9.4	elt-3	R07E4.1	R07E4.1	R07E4.1	R07E4.1	R07E4.1	R07E4.1	R07E4.1	R07E4.1	R07E4.1	R07E4.1	K08E7.5	K08E7.5	K08E7.5	K08E7.5	C16H3.1	ncs-7
Y37D8A.10	hpo-21	T03F6.5	lis-1	T03F6.5	lis-1	T03F6.5	lis-1	T03F6.5	lis-1	M03E7.5	memb-2	F15D4.3	rmo-1	C15H9.8	prx-3	F15D4.3	rmo-1	ZK1058.2	pat-3	F55A8.1	egl-18	F23B12.7	F23B12.7	F23B12.7	F23B12.7	M88.6	pan-1	M88.6	pan-1	F55A8.1	egl-18	F55A8.1	egl-18	F55A8.1	egl-18	C44F1.5	acy-3	C44F1.5	acy-3	K08E7.5	K08E7.5	K08E7.5	K08E7.5	C44C1.3	ncs-1	F21A10.1	ncs-4	ZK154.3	mec-7
C36B1.4	pas-4	Y37D8A.10	hpo-21	F58E10.5	end-3	Y37D8A.10	hpo-21	F58E10.5	end-3	T05G5.3	cdk-1	B0432.9	B0432.9	F11A10.7	F11A10.7	Y56A3A.13	nft-1	F56F10.4	lgl-1	M88.6	pan-1	ZK1058.2	pat-3	K02B9.4	elt-3	F56F10.4	lgl-1	F56F10.4	lgl-1	F52C12.5	elt-6	F52C12.5	elt-6	F52C12.5	elt-6	F20D12.6	ceh-19	F20D12.6	ceh-19	C44F1.5	acy-3	C44C1.3	ncs-1	F20D12.6	ceh-19	C16H3.1	ncs-7	T07A9.11	rps-24
Y39G10AR.14	mcm-4	C36B1.4	pas-4	Y39G10AR.14	mcm-4	F58E10.5	end-3	Y39G10AR.14	mcm-4	F18H3.5	cdk-4	T19B10.11	mxl-1	F44C4.5	ppt-1	B0432.9	B0432.9	F25B5.7	psf-1	F56F10.4	lgl-1	C18G1.2	elt-7	C18G1.2	elt-7	F25B4.2	F25B4.2	F25B4.2	F25B4.2	F09F9.4	F09F9.4	F53B1.6	F53B1.6	F09F9.4	F09F9.4	F53B1.6	F53B1.6	C23H3.9	C23H3.9	F20D12.6	ceh-19	F56E3.3	klp-4	C03F11.2	C03F11.2	C44C1.3	ncs-1	F13H8.10	bpl-1
F53H1.3	F53H1.3	F58E10.5	end-3	F17C11.10	F17C11.10	C18G1.2	elt-7	F17C11.10	F17C11.10	Y37D8A.10	hpo-21	Y54G11A.11	Y54G11A.11	B0432.9	B0432.9	T19B10.11	mxl-1	Y23H5B.6	Y23H5B.6	F25B5.7	psf-1	C15F1.4	ppp-1	F55F8.2	F55F8.2	C26C6.1	pbrm-1	Y71H2AM.17	swsn-3	M88.6	pan-1	Y53F4B.20	Y53F4B.20	F20D12.6	ceh-19	C23H3.9	C23H3.9	Y53F4B.20	Y53F4B.20	C03F11.2	C03F11.2	F20D12.6	ceh-19	C23H3.9	C23H3.9	F20D12.6	ceh-19	F58F9.1	F58F9.1
C43E11.2	mus-81	Y39G10AR.14	mcm-4	F53H1.3	F53H1.3	Y39G10AR.14	mcm-4	F52G2.1	dcap-2	F58E10.2	end-1	F17C11.9	eef-1G	T19B10.11	mxl-1	Y54G11A.11	Y54G11A.11	Y71H2AM.17	swsn-3	F25B4.2	F25B4.2	C26C6.1	pbrm-1	F56F10.4	lgl-1	C55B7.12	che-1	H38K22.1	evl-14	F56F10.4	lgl-1	T04F3.4	T04F3.4	C14A4.11	C14A4.11	T04F3.4	T04F3.4	Y67D8C.9	Y67D8C.9	C23H3.9	C23H3.9	C03F11.2	C03F11.2	C25D7.5	C25D7.5	F37C12.12	mec-14	T21C12.2	hpd-1
M106.4	gmps-1	F53H1.3	F53H1.3	F52G2.1	dcap-2	R07E5.8	cku-80	R07E5.8	cku-80	C15H9.8	prx-3	C37H5.6	C37H5.6	C01A2.4	C01A2.4	C37H5.6	C37H5.6	H38K22.1	evl-14	F54F2.1	pat-2	R06F6.1	cdl-1	C26C6.1	pbrm-1	F14H12.4	cst-1	C55B7.12	che-1	F25B4.2	F25B4.2	F58A4.14	F58A4.14	F53B1.6	F53B1.6	F55A11.1	F55A11.1	T16G12.1	T16G12.1	ZK524.2	unc-13	C23H3.9	C23H3.9	ZK524.2	unc-13	C03F11.2	C03F11.2	C01C4.3	C01C4.3
F43G9.1	idha-1	R07E5.8	cku-80	R07E5.8	cku-80	F44E2.10	F44E2.10	F44E2.10	F44E2.10	F55F8.2	F55F8.2	Y71G12B.14	lsm-6	Y71G12B.14	lsm-6	C14B1.1	pdi-1	R02D3.3	R02D3.3	Y23H5B.6	Y23H5B.6	F48A11.5	ubxn-3	H38K22.1	evl-14	Y62E10A.8	mau-8	F14H12.4	cst-1	F53B1.6	F53B1.6	W05B10.4	W05B10.4	Y53F4B.20	Y53F4B.20	T25F10.5	bbs-8	Y75B8A.24	Y75B8A.24	VB0395L.1	VB0395L.1	C25D7.5	C25D7.5	T07F10.1	T07F10.1	C25D7.5	C25D7.5	B0310.5	ugt-46
Y56A3A.13	nft-1	C43E11.2	mus-81	R06F6.1	cdl-1	R06F6.1	cdl-1	R06F6.1	cdl-1	R07E5.8	cku-80	Y37E11AR.5	ugt-45	F10D2.8	F10D2.8	Y71G12B.14	lsm-6	C55B7.12	che-1	Y67D8C.9	Y67D8C.9	F26F4.4	tag-340	R02D3.3	R02D3.3	B0361.2	B0361.2	Y62E10A.8	mau-8	C55B7.12	che-1	F28F5.3	lim-8	Y44E3A.4	Y44E3A.4	F58A4.14	F58A4.14	Y44E3A.4	Y44E3A.4	Y67D8C.9	Y67D8C.9	ZK524.2	unc-13	T16G12.1	T16G12.1	ZK524.2	unc-13	C44H9.1	ugt-15
R06F6.1	cdl-1	F44E2.10	F44E2.10	F48A11.5	ubxn-3	F48A11.5	ubxn-3	F48A11.5	ubxn-3	C27A12.3	tag-146	F10D2.8	F10D2.8	ZC455.6	ugt-5	Y57G11C.12	nuo-3	Y47D3A.16	rsks-1	H38K22.1	evl-14	F11A3.2	F11A3.2	F14H12.4	cst-1	ZK973.11	ZK973.11	F21C10.7	F21C10.7	W05B10.4	W05B10.4	T07C5.1	ugt-50	T25F10.5	bbs-8	C16C2.3	ocrl-1	T25F10.5	bbs-8	T16G12.1	T16G12.1	VB0395L.1	VB0395L.1	F53A10.2	F53A10.2	VB0395L.1	VB0395L.1	F47C10.6	ugt-32
F49E8.3	pam-1	R06F6.1	cdl-1	F49E8.3	pam-1	F49E8.3	pam-1	F49E8.3	pam-1	Y42A5A.5	Y42A5A.5	F26A3.1	F26A3.1	T14F9.5	lin-32	T14F9.5	lin-32	F14H12.4	cst-1	R02D3.3	R02D3.3	R05D3.7	unc-116	F54C9.9	F54C9.9	H06O01.1	pdi-3	Y39B6A.38	reps-1	F14H12.4	cst-1	F48D6.3	hlh-13	F58A4.14	F58A4.14	W05B10.4	W05B10.4	C24H11.7	gbf-1	F53A10.2	F53A10.2	T07F10.1	T07F10.1	T25F10.5	bbs-8	T07F10.1	T07F10.1	F10D2.2	ugt-39
Y41D4B.19	npp-8	F49E8.3	pam-1	Y41D4B.19	npp-8	Y41D4B.19	npp-8	Y41D4B.19	npp-8	C15F1.4	ppp-1	F59A2.4	clpf-1	F26A3.1	F26A3.1	T04G9.4	T04G9.4	F54C9.9	F54C9.9	C55B7.12	che-1	ZK973.11	ZK973.11	Y62E10A.8	mau-8	C07A12.4	pdi-2	R09E10.5	R09E10.5	C24A8.4	cst-2	F59C6.7	che-13	W05B10.4	W05B10.4	C56E6.5	abch-1	T25B9.10	T25B9.10	T25F10.5	bbs-8	T16G12.1	T16G12.1	T25B9.10	T25B9.10	T16G12.1	T16G12.1	H23N18.4	H23N18.4
F37A4.9	bath-41	Y41D4B.19	npp-8	Y46G5A.12	vps-2	F37A4.9	bath-41	F37A4.9	bath-41	F11A10.7	F11A10.7	ZK1127.5	ZK1127.5	T28H10.1	T28H10.1	C11H1.7	C11H1.7	C14B1.10	alkb-8	Y6B3A.1	agef-1	H06O01.1	pdi-3	ZK973.11	ZK973.11	Y57G11C.21	Y57G11C.21	C03A7.13	C03A7.13	Y62E10A.8	mau-8	F02E8.3	aps-2	C24A8.4	cst-2	F48E3.1	gly-12	C04C3.5	dyf-3	F58A4.14	F58A4.14	T04F3.4	T04F3.4	D2092.4	D2092.4	T04F3.4	T04F3.4	T19H12.1	ugt-9
Y46G5A.12	vps-2	F37A4.9	bath-41	F40G9.1	sec-20	Y46G5A.12	vps-2	F40G9.1	sec-20	F44C4.5	ppt-1	W04D2.5	mrps-11	C11H1.7	C11H1.7	F59A2.4	clpf-1	Y62E10A.8	mau-8	F14H12.4	cst-1	C07A12.4	pdi-2	H06O01.1	pdi-3	C14B9.6	gei-8	C03A7.12	C03A7.12	F21C10.7	F21C10.7	C25A1.2	fkh-10	C04C3.5	dyf-3	F28F5.3	lim-8	C56E6.5	abch-1	C24H11.7	gbf-1	F53A10.2	F53A10.2	C18D1.4	stg-1	F53A10.2	F53A10.2	C08F11.8	ugt-22
H14A12.3	H14A12.3	Y46G5A.12	vps-2	E01A2.2	E01A2.2	E01A2.2	E01A2.2	E01A2.2	E01A2.2	B0432.9	B0432.9	Y73E7A.1	Y73E7A.1	ZK1127.5	ZK1127.5	ZK1127.5	ZK1127.5	Y50D7A.6	klp-20	F21C10.7	F21C10.7	F28C6.3	cpf-1	F54H12.2	F54H12.2	D2045.7	D2045.7	T03D3.1	ugt-53	Y39B6A.38	reps-1	T08H4.3	ast-1	C56E6.5	abch-1	F54D1.6	F54D1.6	F28F5.3	lim-8	T25B9.10	T25B9.10	T25F10.5	bbs-8	F17C8.6	F17C8.6	T25B9.10	T25B9.10	F54D7.3	gnrr-1
C10H11.8	C10H11.8	F40G9.1	sec-20	C39B5.6	C39B5.6	F17A9.2	F17A9.2	B0361.2	B0361.2	T19B10.11	mxl-1	F29G9.3	aps-1	W04D2.5	mrps-11	W04D2.5	mrps-11	ZK973.11	ZK973.11	R05D3.7	unc-116	C14B9.6	gei-8	C14B9.6	gei-8	F46F6.2	pkn-1	C07A9.6	ugt-60	R09E10.5	R09E10.5	Y73B6BL.30	blos-2	F28F5.3	lim-8	K03H1.5	K03H1.5	F54D1.6	F54D1.6	C56E6.5	abch-1	C24H11.7	gbf-1	C27F2.2	nca-2	D2092.4	D2092.4	C15H11.2	gnrr-2
B0280.9	B0280.9	H14A12.3	H14A12.3	F17A9.2	F17A9.2	CC4.3	smu-1	F17A9.2	F17A9.2	Y71H2AM.17	swsn-3	T12D8.10	T12D8.10	Y73E7A.1	Y73E7A.1	T12D8.10	T12D8.10	Y39B6A.33	Y39B6A.33	Y50D7A.6	klp-20	D2045.7	D2045.7	D2045.7	D2045.7	F39G3.1	ugt-61	K08B4.4	ugt-20	C03A7.13	C03A7.13	F57C12.2	F57C12.2	R09E10.5	R09E10.5	C50F7.6	C50F7.6	R09E10.5	R09E10.5	C11D2.6	unc-77	T25B9.10	T25B9.10	C11D2.6	unc-77	F55C10.5	F55C10.5	C41G11.4	gnrr-4
C34C12.8	C34C12.8	M01F1.1	gly-14	CC4.3	smu-1	C03C10.3	rnr-2	C14B1.1	pdi-1	R186.7	R186.7	B0511.10	eif-3.E	ZC97.1	mtx-2	ZC97.1	mtx-2	C14B9.6	gei-8	ZK973.11	ZK973.11	T20B12.3	T20B12.3	T03D3.1	ugt-53	C07A9.6	ugt-60	F25G6.2	symk-1	C03A7.12	C03A7.12	K10G6.4	K10G6.4	K03H1.5	K03H1.5	R11A8.3	ugt-59	K03H1.5	K03H1.5	C09D1.1	unc-89	F55C10.5	F55C10.5	C09D1.1	unc-89	C18D1.4	stg-1	H22D07.1	gnrr-5
C39B5.6	C39B5.6	E01A2.2	E01A2.2	C03C10.3	rnr-2	Y54F10AM.5	Y54F10AM.5	CC4.3	smu-1	Y119D3B.16	mrpl-45	ZC97.1	mtx-2	F39B2.5	F39B2.5	F39B2.5	F39B2.5	T26A5.7	set-1	R09E10.5	R09E10.5	F46F6.2	pkn-1	F39G3.1	ugt-61	C36E8.3	pxd-1	T04B8.5	T04B8.5	C03A7.11	ugt-51	R08D7.7	R08D7.7	T07C5.1	ugt-50	T04H1.8	ugt-56	R11A8.3	ugt-59	F54D1.6	F54D1.6	C18D1.4	stg-1	M02B7.3	osm-3	F17C8.6	F17C8.6	Y105C5A.23	daf-38
CC4.3	smu-1	C34C12.8	C34C12.8	T12F5.5	larp-5	Y37E11AR.5	ugt-45	C03C10.3	rnr-2	R02D3.3	R02D3.3	Y44E3A.3	trx-4	Y44E3A.3	trx-4	Y55F3AR.2	Y55F3AR.2	D2045.7	D2045.7	C14B9.6	gei-8	T03D3.1	ugt-53	C07A9.6	ugt-60	F25G6.2	symk-1	F22F7.2	F22F7.2	T07C5.1	ugt-50	C32B5.13	C32B5.13	C18C4.3	ugt-48	F48D6.3	hlh-13	C48A7.1	egl-19	C50F7.6	C50F7.6	F17C8.6	F17C8.6	F54D1.6	F54D1.6	C27F2.2	nca-2	K11H12.1	K11H12.1
C03C10.3	rnr-2	C39B5.6	C39B5.6	Y108G3AL.7	arid-1	W03F9.10	W03F9.10	W03F9.10	W03F9.10	Y54G11A.11	Y54G11A.11	Y55F3AR.2	Y55F3AR.2	Y55F3AR.2	Y55F3AR.2	T20B12.7	T20B12.7	T20B12.3	T20B12.3	C03A7.13	C03A7.13	F39G3.1	ugt-61	T14F9.5	lin-32	T04B8.5	T04B8.5	C18E9.2	C18E9.2	T04G9.4	T04G9.4	F26E4.3	F26E4.3	R11A8.3	ugt-59	C48A7.1	egl-19	F10G8.5	ncs-2	R11A8.3	ugt-59	C27F2.2	nca-2	C30G7.2	C30G7.2	C11D2.6	unc-77	W01B11.6	W01B11.6
Y54F10AM.5	Y54F10AM.5	F17A9.2	F17A9.2	W03F9.10	W03F9.10	F59A2.4	clpf-1	ZK632.2	ZK632.2	T26A5.6	T26A5.6	T20B12.7	T20B12.7	R08E3.3	R08E3.3	K09E4.3	K09E4.3	T03D3.1	ugt-53	T03D3.1	ugt-53	F29F11.2	ugt-34	C36E8.3	pxd-1	R10E11.1	cbp-1	K07C11.9	cogc-6	F59C6.7	che-13	C41G7.9	C41G7.9	F48D6.3	hlh-13	F59C6.7	che-13	R07E4.6	kin-2	F48D6.3	hlh-13	C11D2.6	unc-77	B0310.5	ugt-46	C09D1.1	unc-89	T22E5.2	glt-4
T12F5.5	larp-5	F55A3.1	2013-03-06	F59A2.4	clpf-1	Y110A7A.4	Y110A7A.4	Y110A7A.4	Y110A7A.4	C01A2.4	C01A2.4	F58A4.9	rpac-19	F41G3.14	exos-8	F15D3.7	F15D3.7	F39G3.1	ugt-61	C07A9.6	ugt-60	C13D9.9	ugt-7	F25G6.2	symk-1	F22F7.2	F22F7.2	C04F6.4	unc-78	F02E8.3	aps-2	C15C7.7	C15C7.7	T04B8.5	T04B8.5	C25A1.2	fkh-10	C32E8.7	ric-19	C48A7.1	egl-19	F21C10.7	F21C10.7	M88.1	ugt-62	M02B7.3	osm-3	K11D12.1	cwp-4
C23G10.2	C23G10.2	C14B1.1	pdi-1	Y66D12A.15	Y66D12A.15	C44E4.3	got-2.1	T04A8.14	emb-5	F54C9.9	F54C9.9	C26D10.2	hel-1	F58A4.9	rpac-19	F41G3.14	exos-8	C07A9.6	ugt-60	C09H6.2	lin-10	C09H6.2	lin-10	R10E11.1	cbp-1	T14G12.4	fkh-2	C04A11.3	gck-4	R11A5.2	nud-2	C44H4.6	C44H4.6	T04G9.4	T04G9.4	C32E8.7	ric-19	C42D8.4	ets-5	F10G8.5	ncs-2	C09D1.1	unc-89	T04H1.8	ugt-56	C30G7.2	C30G7.2	F56E10.4	rps-27
Y45F10A.4	seld-1	CC4.3	smu-1	Y110A7A.4	Y110A7A.4	F10C5.2	F10C5.2	C44E4.3	got-2.1	C10H11.8	C10H11.8	Y39A1C.3	cey-4	C35C5.4	mig-2	F44E2.6	F44E2.6	K08B4.4	ugt-20	F25G6.2	symk-1	B0336.6	abi-1	T04A8.14	emb-5	C18E9.2	C18E9.2	H06I04.2	sft-1	T08H4.3	ast-1	B0222.4	tag-38	R05D7.3	R05D7.3	R11A5.2	nud-2	T07D1.1	gcy-31	R07E4.6	kin-2	F54D1.6	F54D1.6	C41G11.4	gnrr-4	B0310.5	ugt-46	K07A3.1	fbp-1
C02F5.9	pbs-6	C03C10.3	rnr-2	Y57A10A.20	sinh-1	Y50D4B.2	Y50D4B.2	Y50D4B.2	Y50D4B.2	F08F8.8	gos-28	F33D4.8	mrps-24	F09E5.2	F09E5.2	C26D10.2	hel-1	T14F9.5	lin-32	T04B8.5	T04B8.5	W03F9.10	W03F9.10	T14G12.4	fkh-2	Y73B6BL.30	blos-2	C29E6.1	let-653	F08D12.1	F08D12.1	C01H6.5	nhr-23	C48A7.1	egl-19	T07D1.1	gcy-31	F57F5.2	gcy-33	Y38F2AL.3	vha-11	C50F7.6	C50F7.6	R05D7.3	R05D7.3	M88.1	ugt-62	C46G7.1	C46G7.1
Y66D12A.15	Y66D12A.15	Y54F10AM.5	Y54F10AM.5	C44E4.3	got-2.1	W07E6.4	prp-21	W07E6.4	prp-21	E01A2.2	E01A2.2	C25H3.9	C25H3.9	R10D12.12	hpo-17	F53A2.4	nud-1	Y69A2AR.29	ngn-1	R10E11.1	cbp-1	C36E8.3	pxd-1	ZK945.3	puf-12	C04A11.3	gck-4	K10G6.4	K10G6.4	R07G3.1	cdc-42	Y110A7A.20	ift-20	F10G8.5	ncs-2	F57F5.2	gcy-33	T23F2.1	bus-8	C02C2.5	C02C2.5	H10D18.6	H10D18.6	F10G8.5	ncs-2	T04H1.8	ugt-56	H06I04.4	ubl-1
Y110A7A.4	Y110A7A.4	T12F5.5	larp-5	F10C5.2	F10C5.2	H26D21.2	msh-2	H06H21.6	ubxn-6	Y62E10A.8	mau-8	K08C9.7	K08C9.7	Y39A1C.3	cey-4	K11H3.6	mrpl-36	C36E8.3	pxd-1	T04A8.14	emb-5	F25G6.2	symk-1	C18E9.2	C18E9.2	M05B5.5	hlh-2	R08D7.7	R08D7.7	C09G12.8	ced-10	C34H3.2	odd-2	F59C6.7	che-13	T23F2.1	bus-8	C32E8.3	C32E8.3	C25A1.2	fkh-10	C48A7.1	egl-19	R07E4.6	kin-2	ZC443.5	ugt-18	K11H12.2	rpl-15
C14F11.1	got-2.2	Y37E11AR.5	ugt-45	Y50D4B.2	Y50D4B.2	B0513.2	B0513.2	H26D21.2	msh-2	B0280.9	B0280.9	T16G1.10	pqn-68	F33D4.8	mrps-24	F49C12.12	F49C12.12	F25G6.2	symk-1	Y61A9LA.10	Y61A9LA.10	T04B8.5	T04B8.5	F32B4.4	F32B4.4	F16B4.8	cdc-25.2	C36E8.4	C36E8.4	T19A5.2	gck-1	Y38H8A.5	Y38H8A.5	C25A1.2	fkh-10	Y106G6E.5	ced-12	K09F5.6	K09F5.6	ZK757.2	ZK757.2	F10G8.5	ncs-2	Y38F2AL.3	vha-11	Y39G10AR.6	ugt-31	R07E3.1	R07E3.1
C44E4.3	got-2.1	C23G10.2	C23G10.2	W07E6.4	prp-21	B0511.10	eif-3.E	C44E4.4	C44E4.4	T08G11.4	T08G11.4	H06H21.3	eif-1.A	T10G3.6	gut-2	C25H3.9	C25H3.9	T04B8.5	T04B8.5	F22F7.2	F22F7.2	R10E11.1	cbp-1	R08E3.3	R08E3.3	C29E6.1	let-653	ZK1127.9	tcer-1	H06I04.2	sft-1	ZK616.10	ehn-3	Y38C1AB.8	frm-5.1	K09F5.6	K09F5.6	D2089.4	ptb-1	C32E8.7	ric-19	R07E4.6	kin-2	F40E10.6	F40E10.6	F47C10.6	ugt-32	Y45F10D.12	rpl-18
F10C5.2	F10C5.2	Y108G3AL.7	arid-1	H06H21.6	ubxn-6	Y48E1C.2	Y48E1C.2	C04A2.7	dnj-5	F17A9.2	F17A9.2	R12E2.13	R12E2.13	Y43F4B.9	Y43F4B.9	F10E7.7	rpl-33	R10E11.1	cbp-1	B0336.9	swp-1	T04A8.14	emb-5	R07G3.1	cdc-42	C26E6.3	ntl-9	C06G3.9	C06G3.9	C43H6.1	C43H6.1	R148.1	mks-1	C32E8.7	ric-19	D2089.4	ptb-1	C48G7.3	rin-1	C42D8.4	ets-5	C02C2.5	C02C2.5	C02C2.5	C02C2.5	H10D18.6	H10D18.6	Y106G6D.4	Y106G6D.4
H06H21.6	ubxn-6	W03F9.10	W03F9.10	H26D21.2	msh-2	F33D11.9	hpo-3	F33D11.9	hpo-3	F28C6.3	cpf-1	M142.1	unc-119	K10G9.3	pad-2	R08C7.3	htz-1	Y61A9LA.10	Y61A9LA.10	Y38C1AB.8	frm-5.1	Y61A9LA.10	Y61A9LA.10	C44B7.2	C44B7.2	W08E3.2	W08E3.2	T12G3.4	T12G3.4	K10G6.4	K10G6.4	C38C3.5	unc-60	K07C11.9	cogc-6	F33A8.3	cey-1	F56H1.1	che-14	T07D1.1	gcy-31	C25A1.2	fkh-10	ZK757.2	ZK757.2	F54D7.3	gnrr-1	C26F1.4	rps-30
H26D21.2	msh-2	C02F5.9	pbs-6	Y44E3A.6	Y44E3A.6	T05H4.14	gad-1	T05H4.14	gad-1	F54H12.2	F54H12.2	C06A1.5	rpb-6	K08C9.7	K08C9.7	Y46H3A.7	mrpl-39	F22F7.2	F22F7.2	F32B4.4	F32B4.4	Y44E3A.6	Y44E3A.6	F56A8.3	F56A8.3	R08C7.3	htz-1	C04G2.6	dis-3	F02E9.2	lin-28	F08C6.7	unc-98	R11A5.2	nud-2	T07A5.6	unc-69	F07C3.1	ptd-2	F57F5.2	gcy-33	ZK757.2	ZK757.2	Y57E12AR.1	Y57E12AR.1	C41G11.4	gnrr-4	Y66H1B.4	spl-1
B0511.10	eif-3.E	F59A2.4	clpf-1	B0511.10	eif-3.E	K07F5.13	npp-1	K07F5.13	npp-1	Y71G12B.14	lsm-6	F26F4.10	rars-1	R05H5.5	R05H5.5	R12E2.13	R12E2.13	B0336.9	swp-1	C04F6.4	unc-78	T14G12.4	fkh-2	C04A11.3	gck-4	F53G12.1	rab-11.1	C01H6.5	nhr-23	R08D7.7	R08D7.7	Y48G10A.3	Y48G10A.3	T08H4.3	ast-1	C48G7.3	rin-1	ZK1248.3	ehs-1	F45E4.3	F45E4.3	Y57E12AR.1	Y57E12AR.1	K07E3.7	catp-5	F11C1.4	F11C1.4	B0250.1	rpl-2
Y48E1C.2	Y48E1C.2	ZK632.2	ZK632.2	C44E4.4	C44E4.4	C55A6.10	C55A6.10	T22A3.5	pash-1	Y54F10AM.5	Y54F10AM.5	C47E12.1	sars-1	Y71F9AL.14	dnc-5	M142.1	unc-119	F32B4.4	F32B4.4	F08D12.1	F08D12.1	C49H3.5	ntl-4	M05B5.5	hlh-2	C36E8.4	C36E8.4	W07G4.3	W07G4.3	C36E8.4	C36E8.4	F46C5.8	rer-1	C42D8.4	ets-5	F56H1.1	che-14	ZC84.2	tax-4	T10A3.1	unc-10	C32E8.7	ric-19	W08D2.5	catp-6	R05D7.3	R05D7.3	F25H2.10	rla-0
K08F11.5	miro-1	Y66D12A.15	Y66D12A.15	Y48E1C.2	Y48E1C.2	Y110A7A.8	prp-31	Y110A7A.8	prp-31	T26A5.7	set-1	B0464.2	B0464.2	T16G1.10	pqn-68	C06A1.5	rpb-6	Y55F3AR.2	Y55F3AR.2	C44B7.2	C44B7.2	C55A6.10	C55A6.10	F16B4.8	cdc-25.2	C32B5.7	C32B5.7	D1014.8	spr-1	ZK1127.6	ZK1127.6	C35C5.5	lev-8	C04F6.4	unc-78	F07C3.1	ptd-2	F43C9.3	hum-10	T23F2.1	bus-8	K07E3.7	catp-5	K03E6.7	K03E6.7	F10G8.5	ncs-2	C05C10.3	C05C10.3
F33D11.9	hpo-3	Y110A7A.4	Y110A7A.4	C04A2.7	dnj-5	Y54E10A.3	Y54E10A.3	C25A1.12	C25A1.12	T20B12.3	T20B12.3	ZK637.2	ZK637.2	D2085.6	piga-1	F25H2.10	rla-0	F08D12.1	F08D12.1	C04A11.3	gck-4	F32B4.4	F32B4.4	C29E6.1	let-653	K08B12.3	K08B12.3	F47D12.4	hmg-1.2	T12G3.4	T12G3.4	T26A8.2	T26A8.2	Y79H2A.6	arx-3	F57C12.2	F57C12.2	C32B5.13	C32B5.13	C32E8.3	C32E8.3	K03E6.7	K03E6.7	Y49A3A.2	vha-13	R07E4.6	kin-2	Y73B6BL.31	Y73B6BL.31
T05H4.14	gad-1	C14F11.1	got-2.2	K08F11.5	miro-1	C25A1.12	C25A1.12	R06C7.8	bub-1	AC3.2	ugt-49	K08D12.3	K08D12.3	ZK1320.7	ZK1320.7	C47E12.1	sars-1	F56A8.3	F56A8.3	H06I04.2	sft-1	C04F6.4	unc-78	W08E3.2	W08E3.2	T12G3.4	T12G3.4	T27C10.6	lrk-1	C01H6.5	nhr-23	C04G2.7	egl-38	R07G3.1	cdc-42	K10G6.4	K10G6.4	Y71H2AM.25	Y71H2AM.25	K09F5.6	K09F5.6	C42D8.4	ets-5	F45E4.3	F45E4.3	Y38F2AL.3	vha-11	R10F2.5	R10F2.5
F53F8.5	F53F8.5	C44E4.3	got-2.1	F33D11.9	hpo-3	K08F9.2	aipl-1	Y71G12B.15	ubc-3	Y49C4A.8	ugt-29	F54D8.2	tag-174	T13G4.4	T13G4.4	ZK970.4	vha-9	C04A11.3	gck-4	C29E6.1	let-653	C44B7.2	C44B7.2	R08C7.3	htz-1	C01H6.5	nhr-23	Y54G2A.2	Y54G2A.2	W07G4.3	W07G4.3	C05C8.7	C05C8.7	T27E9.3	cdk-5	ZC84.2	tax-4	F26E4.3	F26E4.3	D2089.4	ptb-1	T07D1.1	gcy-31	T23F2.1	bus-8	F40E10.6	F40E10.6	Y97E10AL.1	Y97E10AL.1
Y54E10A.3	Y54E10A.3	F10C5.2	F10C5.2	T05H4.14	gad-1	R06C7.8	bub-1	D1081.8	D1081.8	F29F11.2	ugt-34	Y38C1AA.11	prdx-6	R12E2.13	R12E2.13	M01F1.2	rpl-16	H06I04.2	sft-1	F41E6.4	smk-1	F56A8.3	F56A8.3	F53G12.1	rab-11.1	K07B1.2	coq-6	Y32F6A.3	pap-1	Y110A7A.20	ift-20	F46A9.5	skr-1	F33A8.3	cey-1	F53G12.1	rab-11.1	Y65B4A.2	Y65B4A.2	C48G7.3	rin-1	F57F5.2	gcy-33	D2089.4	ptb-1	C02C2.5	C02C2.5	F54E7.2	rps-12
K09E4.3	K09E4.3	W07E6.4	prp-21	K07F5.13	npp-1	Y71G12B.15	ubc-3	Y47D3A.4	cku-70	F10D2.12	F10D2.12	B0207.4	air-2	C06A1.5	rpb-6	T14B4.2	T14B4.2	M05B5.5	hlh-2	W08E3.2	W08E3.2	D1081.8	D1081.8	ZK1127.9	tcer-1	F47D12.4	hmg-1.2	ZK616.10	ehn-3	D1014.8	spr-1	C07H6.3	cls-1	T07A5.6	unc-69	C32B5.13	C32B5.13	F54E4.1	rbc-1	F56H1.1	che-14	F45E4.3	F45E4.3	T06C12.10	cgt-1	ZK757.2	ZK757.2	Y48G8AL.8	rpl-17
C03C10.4	C03C10.4	H06H21.6	ubxn-6	F53F8.5	F53F8.5	Y66A7A.2	Y66A7A.2	D2085.3	D2085.3	F10D2.8	F10D2.8	Y41D4B.12	set-23	R10H10.6	R10H10.6	Y57A10A.26	Y57A10A.26	C29E6.1	let-653	K10G6.4	K10G6.4	C26D10.2	hel-1	ZK1098.1	ZK1098.1	R05D3.2	R05D3.2	F40E10.1	hch-1	C34H3.2	odd-2	ZC250.3	nstp-3	T19A5.2	gck-1	F26E4.3	F26E4.3	F38G1.1	che-2	F07C3.1	ptd-2	T10A3.1	unc-10	F20B4.6	cgt-2	Y57E12AR.1	Y57E12AR.1	F58B4.1	nas-31
F54C9.6	bcs-1	H26D21.2	msh-2	T22A3.5	pash-1	D1081.8	D1081.8	Y47D3A.27	teg-1	ZC455.5	ugt-4	T26C12.3	T26C12.3	D2007.5	atg-13	Y48G1C.12	Y48G1C.12	C26E6.3	ntl-9	C46C11.1	C46C11.1	C04A11.3	gck-4	K08B12.3	K08B12.3	F28B3.7	him-1	F42A10.8	nas-28	Y54G2A.2	Y54G2A.2	Y105C5B.29	hlh-32	F56H1.1	che-14	C15C7.7	C15C7.7	C50D2.2	C50D2.2	ZK1248.3	ehs-1	T23F2.1	bus-8	T22E5.2	glt-4	K07E3.7	catp-5	T02B11.7	nas-32
K08F9.2	aipl-1	B0513.2	B0513.2	Y73E7A.9	adpr-1	C26D10.2	hel-1	ZK637.11	cdc-25.3	ZC455.6	ugt-5	C25A1.6	nola-3	C47E12.1	sars-1	Y75B8A.14	Y75B8A.14	F41E6.4	smk-1	ZK1067.2	ZK1067.2	D2085.3	D2085.3	K04G7.10	rnp-7	C44C10.4	C44C10.4	C26B2.1	dnc-4	Y38H8A.5	Y38H8A.5	F38C2.2	hlh-17	H06I04.2	sft-1	C44H4.6	C44H4.6	Y54G2A.25	lad-2	F57C12.2	F57C12.2	C32E8.3	C32E8.3	ZK1248.3	ehs-1	W08D2.5	catp-6	F46C5.3	nas-25
Y79H2A.6	arx-3	B0511.10	eif-3.E	Y110A7A.8	prp-31	Y47D3A.27	teg-1	C30A5.3	C30A5.3	C13D9.9	ugt-7	R09B3.5	mag-1	F36A2.8	phip-1	Y48G8AL.8	rpl-17	W08E3.2	W08E3.2	C36E8.4	C36E8.4	F20D1.6	rbg-1	T12G3.4	T12G3.4	T14B4.2	T14B4.2	C11H1.2	C11H1.2	C47D2.2	cdd-1	T25G12.4	rab-6.2	T06C12.10	cgt-1	F20D1.2	tbc-1	C33F10.5	rig-6	F23H11.8	pef-1	K09F5.6	K09F5.6	K11D12.9	K11D12.9	C03A3.2	C03A3.2	R151.3	rpl-6
Y66A7A.2	Y66A7A.2	C44E4.4	C44E4.4	K09E4.3	K09E4.3	ZK637.11	cdc-25.3	T05E8.3	T05E8.3	AC3.7	ugt-1	Y54E10A.10	Y54E10A.10	Y57A10A.26	Y57A10A.26	ZK637.2	ZK637.2	C46C11.1	C46C11.1	ZK1127.9	tcer-1	M05B5.5	hlh-2	B0495.5	B0495.5	C05D11.12	let-721	F28B12.2	egl-44	ZK616.10	ehn-3	F19H8.3	arl-3	F53E2.1	tag-304	B0222.4	tag-38	K04E7.2	pept-1	F36F2.5	tax-2	D2089.4	ptb-1	ZK909.3	ZK909.3	K03E6.7	K03E6.7	ZK1073.1	ZK1073.1
R10D12.12	hpo-17	Y48E1C.2	Y48E1C.2	C25A1.12	C25A1.12	C30A5.3	C30A5.3	Y37E11AM.1	smgl-2	C17G1.3	ugt-23	R12H7.3	skr-19	C55B7.9	mdt-18	K08D12.3	K08D12.3	C06G3.9	C06G3.9	ZK1127.6	ZK1127.6	F16B4.8	cdc-25.2	K07B1.2	coq-6	F40E10.1	hch-1	K08F8.6	let-19	Y48G1C.12	Y48G1C.12	Y105E8B.9	Y105E8B.9	K10G6.4	K10G6.4	F38G1.1	che-2	Y38H8A.5	Y38H8A.5	ZC84.2	tax-4	F07C3.1	ptd-2	F43C9.3	hum-10	T07D1.1	gcy-31	C06H2.4	folt-1
M01E11.5	cey-3	C04A2.7	dnj-5	K08F9.2	aipl-1	T05E8.3	T05E8.3	C04H5.6	mog-4	Y45F10A.4	seld-1	R12H7.5	skr-20	B0464.2	B0464.2	Y38C1AA.11	prdx-6	K04G7.10	rnp-7	C06G3.9	C06G3.9	C29E6.1	let-653	F57A8.2	yif-1	F42A10.8	nas-28	C43H6.7	dhhc-9	F42A10.8	nas-28	C24B5.4	C24B5.4	F53G12.1	rab-11.1	Y110A7A.20	ift-20	F45B8.4	pag-3	F43C9.3	hum-10	F20B4.6	cgt-2	Y65B4A.2	Y65B4A.2	F57F5.2	gcy-33	E04A4.8	rpl-20
F46F11.2	cey-2	K08F11.5	miro-1	R06C7.8	bub-1	Y37E11AM.1	smgl-2	F13B12.1	F13B12.1	T14F9.5	lin-32	K08H2.1	skr-21	ZK637.2	ZK637.2	Y48E1B.3	Y48E1B.3	T12G3.4	T12G3.4	C13F10.4	C13F10.4	C26E6.3	ntl-9	F47D12.4	hmg-1.2	C26B2.1	dnc-4	F58A6.1	F58A6.1	Y48G10A.3	Y48G10A.3	F10G8.8	F10G8.8	F53F10.4	unc-108	Y54G2A.25	lad-2	C08G9.2	C08G9.2	Y71H2AM.25	Y71H2AM.25	T22E5.2	glt-4	F54E4.1	rbc-1	Y49A3A.2	vha-13	F39B2.8	F39B2.8
F53A2.4	nud-1	F33D11.9	hpo-3	Y71G12B.15	ubc-3	F21C3.3	hint-1	K08C9.7	K08C9.7	C52E4.3	snr-4	C42D4.6	skr-16	K08D12.3	K08D12.3	Y62E10A.12	lsm-3	Y104H12D.3	Y104H12D.3	K04G7.10	rnp-7	F41E6.4	smk-1	F26F4.10	rars-1	F28B12.2	egl-44	H06O01.2	chd-1	F46C5.8	rer-1	T23D8.8	cfi-1	K09A9.2	rab-14	C33F10.5	rig-6	F41D9.3	wrk-1	F26E4.3	F26E4.3	ZK1248.3	ehs-1	Y75B7AL.3	snt-3	F45E4.3	F45E4.3	B0228.7	B0228.7
M18.6	M18.6	T05H4.14	gad-1	Y47D3A.4	cku-70	T24F1.1	raga-1	Y80D3A.2	emb-4	F26A3.1	F26A3.1	Y47D7A.8	skr-14	Y105E8B.7	Y105E8B.7	B0207.4	air-2	C04G2.6	dis-3	T12G3.4	T12G3.4	W08E3.2	W08E3.2	B0280.4	odd-1	K08F8.6	let-19	K07C11.1	pax-1	F28B12.2	egl-44	Y38F2AL.2	mksr-2	R08D7.7	R08D7.7	K04E7.2	pept-1	R151.5	dpy-31	Y65B4A.2	Y65B4A.2	F23H11.8	pef-1	F31E8.2	snt-1	T10A3.1	unc-10	F13D12.2	ldh-1
T10G3.6	gut-2	K07F5.13	npp-1	ZK637.11	cdc-25.3	F13B12.1	F13B12.1	F44B9.8	F44B9.8	T28H10.1	T28H10.1	F54D10.1	skr-15	T01G1.4	T01G1.4	Y60A3A.9	Y60A3A.9	C02E11.1	nra-4	Y104H12D.3	Y104H12D.3	B0205.7	kin-3	F28B3.7	him-1	C43H6.7	dhhc-9	C47D12.2	C47D12.2	C43H6.7	dhhc-9	Y105E8A.5	bbs-1	C32B5.13	C32B5.13	T23G5.6	saeg-2	R148.1	mks-1	F54E4.1	rbc-1	ZK909.3	ZK909.3	C32A3.3	rilp-1	D2089.4	ptb-1	F58A4.7	hlh-11
F59G1.1	cgt-3	F53F8.5	F53F8.5	K06A5.7	cdc-25.1	F44B9.8	F44B9.8	ZK1098.1	ZK1098.1	ZK1127.5	ZK1127.5	C52D10.7	skr-9	Y41D4B.12	set-23	Y41D4B.12	set-23	R01H10.8	cnk-1	C04G2.6	dis-3	K10G9.3	pad-2	C44C10.4	C44C10.4	H06O01.2	chd-1	F11A10.4	mon-2	C35C5.5	lev-8	F57C12.3	hlh-19	F26E4.3	F26E4.3	F45B8.4	pag-3	C27H6.1	unc-41	F38G1.1	che-2	F36F2.5	tax-2	F49C5.4	F49C5.4	F20B4.6	cgt-2	F07D10.1	rpl-11.2
K06A5.7	cdc-25.1	T22A3.5	pash-1	C30A5.3	C30A5.3	M110.3	M110.3	M110.3	M110.3	Y110A7A.4	Y110A7A.4	C52D10.9	skr-8	C25A1.6	nola-3	T26C12.3	T26C12.3	F47D12.4	hmg-1.2	C01H6.5	nhr-23	C46C11.1	C46C11.1	C05D11.12	let-721	F26F12.7	let-418	C05C8.7	C05C8.7	H06O01.2	chd-1	ZK682.4	hlh-10	C41G7.9	C41G7.9	C08G9.2	C08G9.2	C31H2.1	tbc-7	C50D2.2	C50D2.2	ZC84.2	tax-4	C50D2.2	C50D2.2	T22E5.2	glt-4	Y71A12B.1	rps-6
Y71H2B.3	ppfr-4	Y73E7A.9	adpr-1	T05E8.3	T05E8.3	H06H21.3	eif-1.A	C15C6.4	C15C6.4	Y73E7A.1	Y73E7A.1	F56B3.12	skr-18	Y54E10A.10	Y54E10A.10	C25A1.6	nola-3	R05D3.2	R05D3.2	C02E11.1	nra-4	R08C7.3	htz-1	F40E10.1	hch-1	T14G8.1	chd-3	C34E10.3	gop-1	T26A8.2	T26A8.2	C54F6.4	swt-2	C15C7.7	C15C7.7	F36G3.1	F36G3.1	Y71H2B.10	apb-1	Y54G2A.25	lad-2	F43C9.3	hum-10	F55F3.1	aakb-1	ZK1248.3	ehs-1	E01H11.1	pkc-2
C30A5.3	C30A5.3	Y110A7A.8	prp-31	Y37E11AM.1	smgl-2	C33H5.6	swd-2.1	R12E2.1	R12E2.1	F02E8.3	aps-2	C56C10.8	icd-1	F58A6.1	F58A6.1	F46C5.8	rer-1	Y54G2A.2	Y54G2A.2	W07G4.3	W07G4.3	F53G12.1	rab-11.1	F42A10.8	nas-28	K07C11.1	pax-1	R07E3.5	acl-5	C04G2.7	egl-38	T09B4.4	T09B4.4	C44H4.6	C44H4.6	F41D9.3	wrk-1	C35C5.5	lev-8	C33F10.5	rig-6	Y65B4A.2	Y65B4A.2	Y39A3CL.2	tag-168	K11D12.9	K11D12.9	D2045.8	D2045.8
Y37E11AM.1	smgl-2	Y54E10A.3	Y54E10A.3	C04H5.6	mog-4	F57C2.5	F57C2.5	M03F8.3	M03F8.3	F29G9.3	aps-1	Y41E3.10	eef-1B.2	R12H7.3	skr-19	R09B3.5	mag-1	W06B4.3	vps-18	R01H10.8	cnk-1	C13F10.4	C13F10.4	C26B2.1	dnc-4	C47D12.2	C47D12.2	C07H6.3	cls-1	K07C11.1	pax-1	ZK892.2	nlt-1	B0222.4	tag-38	C34D4.4	C34D4.4	ZC504.2	acr-8	Y39A3CL.2	tag-168	F54E4.1	rbc-1	F56F4.5	pept-3	F23H11.8	pef-1	ZC239.3	ZC239.3
Y18D10A.17	car-1	C03C10.4	C03C10.4	T24F1.1	raga-1	C15C6.4	C15C6.4	T27C4.4	lin-40	T12D8.10	T12D8.10	F59C6.5	F59C6.5	R12H7.5	skr-20	W10D9.5	tomm-22	F13E9.13	F13E9.13	R05D3.2	R05D3.2	Y18D10A.5	gsk-3	T26C12.3	T26C12.3	Y37B11A.3	Y37B11A.3	B0414.7	mtk-1	C05C8.7	C05C8.7	D1081.2	unc-120	F38G1.1	che-2	R151.5	dpy-31	R01E6.4	acr-12	K04E7.2	pept-1	F38G1.1	che-2	K04E7.2	pept-1	ZK909.3	ZK909.3	K02F6.5	K02F6.5
F21C3.3	hint-1	C25A1.12	C25A1.12	F13B12.1	F13B12.1	R12E2.1	R12E2.1	DY3.2	lmn-1	B0513.2	B0513.2	JC8.4	JC8.4	K08H2.1	skr-21	Y54E10A.10	Y54E10A.10	Y32F6A.3	pap-1	T27C10.6	lrk-1	C04G2.6	dis-3	Y116A8C.12	arf-6	C05C8.7	C05C8.7	C23F12.1	fln-2	F46E10.9	dpy-11	C04F1.3	lim-7	C34H3.2	odd-2	R148.1	mks-1	C44B12.2	ost-1	T23G5.6	saeg-2	C50D2.2	C50D2.2	ZK970.4	vha-9	F36F2.5	tax-2	K02F6.8	K02F6.8
T24F1.1	raga-1	K08F9.2	aipl-1	Y80D3A.2	emb-4	F57A8.2	yif-1	C29E4.4	npp-15	Y57G11C.33	Y57G11C.33	F53F4.10	F53F4.10	T09B4.10	chn-1	Y43F8C.8	mrps-28	C46F11.4	C46F11.4	Y54G2A.2	Y54G2A.2	C02E11.1	nra-4	F46C5.8	rer-1	F46E10.9	dpy-11	Y105E8A.9	apg-1	C07H6.3	cls-1	Y46E12A.3	Y46E12A.3	Y54G2A.25	lad-2	C38C3.5	unc-60	T07D1.2	T07D1.2	C08G9.2	C08G9.2	C33F10.5	rig-6	T23G5.6	saeg-2	F53F10.4	unc-108	C37H5.1	nex-4
Y39B6A.2	pph-5	R06C7.8	bub-1	M110.3	M110.3	C29H12.1	rars-2	D1007.7	nrd-1	T20G5.10	blos-1	Y48E1B.5	mrpl-37	ZK652.9	coq-5	R12H7.3	skr-19	F53H1.1	F53H1.1	W06B4.3	vps-18	B0495.5	B0495.5	K08F8.6	let-19	R07E3.5	acl-5	T25B9.1	T25B9.1	Y105C5B.29	hlh-32	F36H1.1	fkb-1	F55F3.1	aakb-1	C31H2.1	tbc-7	C04G2.7	egl-38	F36G3.1	F36G3.1	Y39A3CL.2	tag-168	F53G12.9	F53G12.9	F43C9.3	hum-10	F55D10.2	rpl-25.1
C36A4.4	C36A4.4	Y66A7A.2	Y66A7A.2	K04G7.10	rnp-7	M03F8.3	M03F8.3	T15H9.6	T15H9.6	F59A6.6	rnh-1.0	Y94H6A.8	Y94H6A.8	C47E12.7	C47E12.7	R12H7.5	skr-20	Y48G1C.12	Y48G1C.12	Y32F6A.3	pap-1	K07B1.2	coq-6	F38H4.8	ech-2	B0414.7	mtk-1	Y105E8A.20	Y105E8A.20	C23F12.1	fln-2	B0511.1	fkb-7	F45B8.4	pag-3	F43G9.2	F43G9.2	F28D1.9	acs-20	Y39G10AR.17	sydn-1	K04E7.2	pept-1	F45B8.4	pag-3	Y65B4A.2	Y65B4A.2	K12H4.7	K12H4.7
K10B2.4	K10B2.4	Y47D3A.4	cku-70	F57C2.5	F57C2.5	T27C4.4	lin-40	F43G6.5	F43G6.5	B0491.7	B0491.7	Y97E10AR.7	Y97E10AR.7	F59C6.5	F59C6.5	K08H2.1	skr-21	C36F7.1	irx-1	C46F11.4	C46F11.4	F57A8.2	yif-1	H06O01.2	chd-1	ZK593.4	rbr-2	ZK593.4	rbr-2	R08D7.5	R08D7.5	F43E2.3	insc-1	C08G9.2	C08G9.2	C35C5.5	lev-8	M02B1.1	srf-3	C27H6.1	unc-41	T23G5.6	saeg-2	C30F8.2	vha-16	ZK669.5	ZK669.5	ZK112.1	pcp-1
M110.3	M110.3	C26D10.2	hel-1	C15C6.4	C15C6.4	DY3.2	lmn-1	C27A2.1	smc-5	F38B7.3	F38B7.3	K04H4.6	crn-6	C16C10.8	C16C10.8	C56C10.8	icd-1	F40E10.1	hch-1	F53H1.1	F53H1.1	Y74C9A.4	rcor-1	F26F12.7	let-418	K07C5.8	cash-1	K07C5.8	cash-1	T25B9.1	T25B9.1	F54C1.5	dyf-1	ZK616.10	ehn-3	T26A8.2	T26A8.2	ZC250.3	nstp-3	C31H2.1	tbc-7	F36G3.1	F36G3.1	R08E3.4	ztf-16	Y75B7AL.3	snt-3	T04A8.7	T04A8.7
H06H21.3	eif-1.A	M18.6	M18.6	R12E2.1	R12E2.1	C29E4.4	npp-15	Y41E3.9	fcd-2	ZC97.1	mtx-2	H13N06.5	hke-4.2	JC8.4	JC8.4	Y41E3.10	eef-1B.2	F42A10.8	nas-28	F15E6.6	F15E6.6	F47D12.4	hmg-1.2	T14G8.1	chd-3	K10H10.2	cysl-2	C24B5.4	C24B5.4	Y105E8B.9	Y105E8B.9	Y55F3AR.1	Y55F3AR.1	W02D9.2	W02D9.2	T07D1.2	T07D1.2	F44C8.7	nstp-8	C44C11.1	ras-1	R08E3.4	ztf-16	H15N14.2	nsf-1	F31E8.2	snt-1	F53A9.5	frpr-8
C33H5.6	swd-2.1	Y47D3A.27	teg-1	T27C4.4	lin-40	F23F1.8	rpt-4	F49E8.4	cdd-2	C18E9.2	C18E9.2	B0281.6	B0281.6	F53F4.10	F53F4.10	F59C6.5	F59C6.5	F33A8.4	F33A8.4	Y39G10AR.17	sydn-1	ZK858.7	ZK858.7	K07C11.1	pax-1	C55B7.8	dbr-1	F10G8.8	F10G8.8	C48E7.6	C48E7.6	C05E4.3	srp-1	F41D9.3	wrk-1	F21F3.7	F21F3.7	F36H1.6	alh-3	C54D2.5	cca-1	Y39G10AR.17	sydn-1	Y95B8A.1	nas-30	C32A3.3	rilp-1	C07G2.3	cct-5
F57C2.5	F57C2.5	F59G1.1	cgt-3	DY3.2	lmn-1	T15H9.6	T15H9.6	F12E12.5	sdz-12	C55A6.10	C55A6.10	C40A11.4	C40A11.4	C04H5.1	C04H5.1	T25G12.4	rab-6.2	C11H1.2	C11H1.2	F40E10.1	hch-1	R05D3.2	R05D3.2	C47D12.2	C47D12.2	ZK377.2	sax-3	T16G1.9	T16G1.9	C24B5.4	C24B5.4	F13D11.2	hbl-1	C34D4.4	C34D4.4	F46A9.5	skr-1	W02B3.2	grk-2	M88.4	M88.4	C27H6.1	unc-41	T24A11.3	toh-1	ZC581.9	ZC581.9	C30C11.4	C30C11.4
F48E8.6	F48E8.6	ZK637.11	cdc-25.3	C29E4.4	npp-15	F43G6.5	F43G6.5	C46E10.9	C46E10.9	F39B2.5	F39B2.5	C17F4.8	C17F4.8	Y57G11C.34	mrps-7	Y48C3A.10	mrpl-20	F28B12.2	egl-44	F42A10.8	nas-28	B0280.4	odd-1	Y37B11A.3	Y37B11A.3	B0457.1	lat-1	B0336.4	rgs-5	F54F2.9	F54F2.9	F27C8.1	aat-1	R148.1	mks-1	C07H6.3	cls-1	F35D2.6	F35D2.6	F09E8.7	lev-1	C31H2.1	tbc-7	F57C12.1	nas-38	F49C5.4	F49C5.4	M02B7.6	cal-3
C15C6.4	C15C6.4	K06A5.7	cdc-25.1	Y47D3A.15	aakb-2	C44C10.5	C44C10.5	Y17G9B.5	Y17G9B.5	Y44E3A.3	trx-4	C40A11.3	C40A11.3	Y97E10AR.7	Y97E10AR.7	W02A11.1	W02A11.1	K08F8.6	let-19	C11H1.2	C11H1.2	C47E12.1	sars-1	R11D1.10	R11D1.10	C36B7.6	C36B7.6	T19B10.3	T19B10.3	F10G8.8	F10G8.8	C27C12.6	dmd-4	C38C3.5	unc-60	M02B1.1	srf-3	F19H8.3	arl-3	K11G12.2	acr-2	C44C11.1	ras-1	C27H6.1	unc-41	C34C12.4	C34C12.4	Y71A12B.4	trp-4
R12E2.1	R12E2.1	Y71H2B.3	ppfr-4	F23F1.8	rpt-4	D2092.2	ppfr-2	C47B2.3	tba-2	C05C8.2	C05C8.2	F52B5.6	rpl-25.2	K04H4.6	crn-6	T10B11.1	pcbd-1	F26F12.7	let-418	F49E11.1	mbk-2	D1007.7	nrd-1	F46E10.9	dpy-11	ZK930.3	vab-23	F32H2.5	fasn-1	C44B9.1	vesa-1	T23H2.5	rab-10	C31H2.1	tbc-7	ZC250.3	nstp-3	T22H6.2	alh-13	ZC504.2	acr-8	C54D2.5	cca-1	C31H2.1	tbc-7	F33D4.2	itr-1	F54D5.12	F54D5.12
F26B1.3	ima-2	C30A5.3	C30A5.3	D1007.7	nrd-1	Y41E3.9	fcd-2	F26E4.8	tba-1	R08E3.3	R08E3.3	E04A4.7	cyc-2.1	C07B5.5	nuc-1	Y39G10AR.20	Y39G10AR.20	T14G8.1	chd-3	F28B12.2	egl-44	F13E9.13	F13E9.13	F49H12.6	acl-4	T16G1.9	T16G1.9	R01B10.4	R01B10.4	T23D8.8	cfi-1	Y53F4B.2	elo-9	C34C12.5	rsu-1	F44C8.7	nstp-8	C48E7.6	C48E7.6	R01E6.4	acr-12	M88.4	M88.4	C44C11.1	ras-1	C50D2.2	C50D2.2	C49H3.11	rps-2
C29H12.1	rars-2	T05E8.3	T05E8.3	T15H9.6	T15H9.6	F49E8.4	cdd-2	C05D11.11	mel-32	C03C10.4	C03C10.4	M106.5	cap-2	B0281.6	B0281.6	JC8.4	JC8.4	K07C11.1	pax-1	K08F8.6	let-19	F28B3.7	him-1	R07E3.5	acl-5	F32H2.5	fasn-1	C44B9.1	vesa-1	F44D12.1	magu-4	F40H3.4	fkh-8	Y71H2B.10	apb-1	Y105C5B.29	hlh-32	C17G1.7	cysl-1	C44B12.2	ost-1	F09E8.7	lev-1	T19D2.2	prl-1	Y54G2A.25	lad-2	F59A2.3	cri-3
[truncated: 910 more rows]
[truncated: 20 more columns]

## Sheet: worm tissuecell-associated gene
DSN-Negative-Positive		N2_4cell_EE_RZ-56		PharyngealMuscle		N2_Ad_gonad-1-RZLI		DMM239_Z1Z4_Em		DMM260_N2ref_EE		DMM401_N2all_L1-DSN		DMM401-N2all_L1-V		DMM402_N2all_L1-DSN		DMM402-N2all_L1-V		DMM383-all-nrn_L1-V		DMM391-all-nrn_L1-V		DMM386-NSML_NSMR-nrn_L1		DMM387-NSML_NSMR-nrn_L1-V		DMM389_NSM_L1		DMM408_Amot_nrn_L2-DSN		DMM414_Amot_nrn_L2-DSN		DMM415_Amot_nrn_L2-DSN
[truncated: 1,470 more rows]
