# Supplementary material for: Comparison of D. melanogaster and C. elegans developmental stages, tissues, and cells by modENCODE RNA-seq data
Source: HighWire-hosted journal article supplement (doi:10.1101/gr.170100.113), 2014-07-01
Supplement: Supplemental_Files.zip [file TableS5A FlyStageAllClusters.xls]

## Sheet: Embryo0-2h
sample name: Embryo0-2h
number of associated genes in the sample: 3012
Cluster 1: mitosis
observed gene count: 190
expected gene count: 83.0070884398808
uncorrected p-value: 2.45066207830526e-33
GO ID	term	observed gene count	expected gene count	uncorrected p-value
GO:0007067	mitosis	60	19.1555	8.8403e-20
GO:0007052	mitotic spindle organization	92	37.5128	3.31764e-19
GO:0007049	cell cycle	25	7.38284	4.30209e-10
GO:0000070	mitotic sister chromatid segregation	16	4.58933	3.53315e-07
GO:0000278	mitotic cell cycle	17	6.38516	3.10062e-05
GO:0000087	M phase of mitotic cell cycle	4	0.798145	0.00158269
GO:0007051	spindle organization	6	2.1949	0.0114913
GO:0007017	microtubule-based process	15	9.3782	0.0357324
GO:0000819	sister chromatid segregation	3	0.997681	0.057534
GO:0000226	microtubule cytoskeleton organization	10	6.18562	0.0734254
GO:0000280	nuclear division	3	1.39675	0.14719
GO:0007010	cytoskeleton organization	7	8.58006	0.78235
Cluster 2: DNA repair
observed gene count: 89
expected gene count: 29.7309042729381
uncorrected p-value: 1.27649065136181e-26
GO ID	term	observed gene count	expected gene count	uncorrected p-value
GO:0006281	DNA repair	41	11.3736	3.03623e-17
GO:0006974	response to DNA damage stimulus	50	18.9559	1.33393e-12
GO:0006259	DNA metabolic process	4	0.997681	0.00665156
Cluster 3: meiosis
observed gene count: 68
expected gene count: 20.3526995693938
uncorrected p-value: 1.21947012414844e-24
GO ID	term	observed gene count	expected gene count	uncorrected p-value
GO:0007143	female meiosis	21	4.98841	1.03211e-11
GO:0016321	female meiosis chromosome segregation	21	6.18562	1.03077e-08
GO:0007059	chromosome segregation	20	6.5847	3.61281e-07
GO:0007126	meiosis	14	4.19026	4.29983e-06
GO:0045132	meiotic chromosome segregation	3	0.798145	0.0270045
GO:0007127	meiosis I	2	0.598609	0.103536
Cluster 4: regulation of mitosis
observed gene count: 76
expected gene count: 27.9350778403445
uncorrected p-value: 1.80869242494916e-19
GO ID	term	observed gene count	expected gene count	uncorrected p-value
GO:0051726	regulation of cell cycle	40	16.1624	2.73462e-09
GO:0007088	regulation of mitosis	18	4.78887	9.32294e-09
GO:0030071	regulation of mitotic metaphase/anaphase transition	7	1.59629	8.27286e-05
GO:0007346	regulation of mitotic cell cycle	14	6.18562	0.00129673
Cluster 5: phosphorylation
observed gene count: 113
expected gene count: 51.6798940046373
uncorrected p-value: 2.29745367446601e-18
GO ID	term	observed gene count	expected gene count	uncorrected p-value
GO:0006468	protein amino acid phosphorylation	104	46.492	7.33583e-18
GO:0016310	phosphorylation	10	5.18794	0.0227669
Cluster 6: segmentation (early development)
observed gene count: 113
expected gene count: 52.0789665452136
uncorrected p-value: 4.66779253302758e-18
GO ID	term	observed gene count	expected gene count	uncorrected p-value
GO:0008298	intracellular mRNA localization	16	4.58933	3.53315e-07
GO:0007281	germ cell development	18	5.98609	1.72861e-06
GO:0008595	determination of anterior/posterior axis, embryo	19	7.38284	2.01024e-05
GO:0009994	oocyte differentiation	7	1.59629	8.27286e-05
GO:0007310	oocyte dorsal/ventral axis specification	12	4.19026	0.000187418
GO:0009950	dorsal/ventral axis specification	15	5.98609	0.000221535
GO:0045451	pole plasm oskar mRNA localization	14	6.18562	0.00129673
GO:0007317	regulation of pole plasm oskar mRNA localization	12	4.98841	0.0014936
GO:0008358	maternal determination of anterior/posterior axis, embryo	4	0.798145	0.00158269
GO:0007309	oocyte axis specification	8	2.99304	0.00415705
GO:0019094	pole plasm mRNA localization	5	1.39675	0.00461244
GO:0007314	oocyte anterior/posterior axis specification	10	4.78887	0.0123539
GO:0007315	pole plasm assembly	7	3.19258	0.0262718
GO:0048599	oocyte development	4	1.39675	0.0330447
GO:0035282	segmentation	5	2.79351	0.128745
GO:0009880	embryonic pattern specification	7	4.3898	0.131547
GO:0000578	embryonic axis specification	2	0.997681	0.261757
GO:0009953	dorsal/ventral pattern formation	7	5.38748	0.284362
GO:0007308	oocyte construction	1	0.399073	0.359268
GO:0009948	anterior/posterior axis specification	2	1.39675	0.422024
GO:0007316	pole plasm RNA localization	1	0.798145	0.58949
GO:0007350	blastoderm segmentation	4	4.3898	0.666167
GO:0009952	anterior/posterior pattern formation	3	3.59165	0.727217
GO:0009798	axis specification	1	1.59629	0.831526
GO:0007389	pattern specification process	1	4.19026	0.990696
Cluster 7: meiosis I (DNA recombination)
observed gene count: 33
expected gene count: 8.18098708181517
uncorrected p-value: 1.20116851501199e-16
GO ID	term	observed gene count	expected gene count	uncorrected p-value
GO:0007131	reciprocal meiotic recombination	21	4.78887	2.03663e-12
GO:0006310	DNA recombination	13	3.39212	8.20155e-07
GO:0007127	meiosis I	2	0.598609	0.103536
Cluster 8: karyosome formation (oogenesis / axis specification)
observed gene count: 49
expected gene count: 17.9582643259357
uncorrected p-value: 4.10802697913242e-13
GO ID	term	observed gene count	expected gene count	uncorrected p-value
GO:0030717	karyosome formation	19	4.78887	7.17413e-10
GO:0007294	germarium-derived oocyte fate determination	17	5.58702	2.67859e-06
GO:0007293	germarium-derived egg chamber formation	12	3.99073	9.81357e-05
GO:0009949	polarity specification of anterior/posterior axis	5	0.997681	0.000315467
GO:0009951	polarity specification of dorsal/ventral axis	5	1.19722	0.00157849
GO:0001709	cell fate determination	11	5.18794	0.0077193
GO:0030706	germarium-derived oocyte differentiation	3	0.598609	0.00793815
GO:0030716	oocyte fate determination	1	0.598609	0.487135
Cluster 9: spindle assembly
observed gene count: 29
expected gene count: 8.18098708181517
uncorrected p-value: 2.78885963738292e-12
GO ID	term	observed gene count	expected gene count	uncorrected p-value
GO:0000212	meiotic spindle organization	7	1.59629	8.27286e-05
GO:0051225	spindle assembly	13	4.78887	0.000208848
GO:0007056	spindle assembly involved in female meiosis	5	0.997681	0.000315467
GO:0007058	spindle assembly involved in female meiosis II	4	0.798145	0.00158269
GO:0007147	female meiosis II	2	0.598609	0.103536
Cluster 10: metaphase plate congression (Metaphase)
observed gene count: 28
expected gene count: 7.78191454123882
uncorrected p-value: 3.703008242551e-12
GO ID	term	observed gene count	expected gene count	uncorrected p-value
GO:0000070	mitotic sister chromatid segregation	16	4.58933	3.53315e-07
GO:0007080	mitotic metaphase plate congression	10	2.39444	4.37917e-06
GO:0000819	sister chromatid segregation	3	0.997681	0.057534
GO:0051310	metaphase plate congression	1	0.598609	0.487135
Cluster 11: spindle checkpoint
observed gene count: 26
expected gene count: 6.98376946008612
uncorrected p-value: 6.09834145521666e-12
GO ID	term	observed gene count	expected gene count	uncorrected p-value
GO:0000075	cell cycle checkpoint	6	1.19722	6.28635e-05
GO:0030071	regulation of mitotic metaphase/anaphase transition	7	1.59629	8.27286e-05
GO:0007093	mitotic cell cycle checkpoint	7	1.79583	0.000307615
GO:0007094	mitotic cell cycle spindle assembly checkpoint	7	2.1949	0.00192951
GO:0031577	spindle checkpoint	2	0.399073	0.0398041
GO:0045786	negative regulation of cell cycle	2	0.598609	0.103536
GO:0045841	negative regulation of mitotic metaphase/anaphase transition	1	0.199536	0.199536
GO:0045839	negative regulation of mitosis	1	0.598609	0.487135
Cluster 12: protein complex assembly
observed gene count: 60
expected gene count: 26.7378602186154
uncorrected p-value: 5.79235970321193e-11
GO ID	term	observed gene count	expected gene count	uncorrected p-value
GO:0006367	transcription initiation from RNA polymerase II promoter	40	12.7703	1.20841e-13
GO:0006366	transcription from RNA polymerase II promoter	24	9.57774	3.06736e-06
GO:0006351	transcription, DNA-dependent	14	8.97913	0.050935
GO:0006461	protein complex assembly	1	0.598609	0.487135
GO:0006352	transcription initiation	2	1.79583	0.562451
Cluster 13: centrosome cycle
observed gene count: 53
expected gene count: 22.5475985425638
uncorrected p-value: 9.00968261548845e-11
GO ID	term	observed gene count	expected gene count	uncorrected p-value
GO:0051297	centrosome organization	24	10.1763	1.16748e-05
GO:0051298	centrosome duplication	27	13.3689	0.000103623
GO:0007099	centriole replication	10	3.99073	0.00253085
GO:0031023	microtubule organizing center organization	3	0.598609	0.00793815
GO:0007098	centrosome cycle	5	1.79583	0.019358
Cluster 14: RNA transport
observed gene count: 30
expected gene count: 9.57774097383239
uncorrected p-value: 1.42904243209307e-10
GO ID	term	observed gene count	expected gene count	uncorrected p-value
GO:0006406	mRNA export from nucleus	13	3.79119	6.23044e-06
GO:0051028	mRNA transport	6	1.39675	0.000364903
GO:0016973	poly(A)+ mRNA export from nucleus	5	1.19722	0.00157849
GO:0006913	nucleocytoplasmic transport	5	1.59629	0.0102808
GO:0050658	RNA transport	2	0.399073	0.0398041
GO:0051236	establishment of RNA localization	1	0.199536	0.199536
GO:0051168	nuclear export	2	1.19722	0.3435
GO:0006403	RNA localization	1	0.598609	0.487135
Cluster 15: double-strand break repair
observed gene count: 20
expected gene count: 4.98840675720437
uncorrected p-value: 1.77548176238245e-10
GO ID	term	observed gene count	expected gene count	uncorrected p-value
GO:0006302	double-strand break repair	10	2.1949	8.90718e-07
GO:0000724	double-strand break repair via homologous recombination	10	2.79351	4.46494e-05
GO:0045003	double-strand break repair via synthesis-dependent strand annealing	5	0.997681	0.000315467
Cluster 16: protein transport
observed gene count: 77
expected gene count: 40.3063265982113
uncorrected p-value: 1.52483118389704e-09
GO ID	term	observed gene count	expected gene count	uncorrected p-value
GO:0006886	intracellular protein transport	36	14.9652	4.32637e-08
GO:0046907	intracellular transport	10	2.79351	4.46494e-05
GO:0015031	protein transport	21	13.3689	0.0180753
GO:0034613	cellular protein localization	2	0.399073	0.0398041
GO:0006605	protein targeting	3	1.19722	0.0982703
GO:0070727	cellular macromolecule localization	1	0.199536	0.199536
GO:0045184	establishment of protein localization	2	1.19722	0.3435
GO:0008104	protein localization	10	8.97913	0.408924
Cluster 17: RNA splicing
observed gene count: 90
expected gene count: 49.8840675720437
uncorrected p-value: 1.99293152210762e-09
GO ID	term	observed gene count	expected gene count	uncorrected p-value
GO:0000398	nuclear mRNA splicing, via spliceosome	73	42.5012	6.01112e-07
GO:0006397	mRNA processing	12	3.99073	9.81357e-05
GO:0006396	RNA processing	11	4.3898	0.00154593
GO:0008380	RNA splicing	2	2.79351	0.801058
Cluster 18: germ-line cyst formation
observed gene count: 18
expected gene count: 4.58933421662802
uncorrected p-value: 2.86879414364901e-09
GO ID	term	observed gene count	expected gene count	uncorrected p-value
GO:0030727	germarium-derived female germ-line cyst formation	10	2.79351	4.46494e-05
GO:0048134	germ-line cyst formation	7	1.79583	0.000307615
GO:0048135	female germ-line cyst formation	2	0.399073	0.0398041
Cluster 19: gene silencing
observed gene count: 27
expected gene count: 9.77727724412057
uncorrected p-value: 5.46124719828314e-08
GO ID	term	observed gene count	expected gene count	uncorrected p-value
GO:0016458	gene silencing	11	3.19258	3.15092e-05
GO:0016246	RNA interference	10	4.98841	0.0169794
GO:0040029	regulation of gene expression, epigenetic	2	0.399073	0.0398041
GO:0035194	posttranscriptional gene silencing by RNA	2	0.399073	0.0398041
GO:0031047	gene silencing by RNA	2	0.598609	0.103536
GO:0016441	posttranscriptional gene silencing	1	0.199536	0.199536
Cluster 20: histone modification
observed gene count: 31
expected gene count: 12.1717124875787
uncorrected p-value: 7.07557158421481e-08
GO ID	term	observed gene count	expected gene count	uncorrected p-value
GO:0006325	chromatin organization	15	5.78655	0.000135699
GO:0051276	chromosome organization	13	5.78655	0.00208585
GO:0016568	chromatin modification	2	0.399073	0.0398041
GO:0016570	histone modification	1	0.798145	0.58949
Cluster 21: DNA damage checkpoint
observed gene count: 12
expected gene count: 2.79350778403445
uncorrected p-value: 2.37468374646611e-07
GO ID	term	observed gene count	expected gene count	uncorrected p-value
GO:0000077	DNA damage checkpoint	9	2.1949	1.84131e-05
GO:0000075	cell cycle checkpoint	6	1.19722	6.28635e-05
GO:0042770	DNA damage response, signal transduction	1	0.199536	0.199536
Cluster 22: oocyte microtubule cytoskeleton organization
observed gene count: 22
expected gene count: 7.78191454123882
uncorrected p-value: 5.41930934875485e-07
GO ID	term	observed gene count	expected gene count	uncorrected p-value
GO:0030951	establishment or maintenance of microtubule cytoskeleton polarity	5	1.19722	0.00157849
GO:0016325	oocyte microtubule cytoskeleton organization	8	2.79351	0.00234846
GO:0008103	oocyte microtubule cytoskeleton polarization	10	4.19026	0.00397547
Cluster 23: endocytosis
observed gene count: 101
expected gene count: 64.4502153030805
uncorrected p-value: 7.53259646329954e-07
GO ID	term	observed gene count	expected gene count	uncorrected p-value
GO:0016192	vesicle-mediated transport	35	17.1601	8.05451e-06
GO:0006897	endocytosis	19	8.38052	0.000181463
GO:0006911	phagocytosis, engulfment	49	35.717	0.00988461
GO:0016044	membrane organization	3	2.59397	0.496686
GO:0006909	phagocytosis	2	3.59165	0.900257
Cluster 24: axonogenesis
observed gene count: 108
expected gene count: 70.0372308711494
uncorrected p-value: 7.55955972664264e-07
GO ID	term	observed gene count	expected gene count	uncorrected p-value
GO:0048813	dendrite morphogenesis	50	26.3388	1.34862e-06
GO:0048666	neuron development	19	8.18099	0.000122053
GO:0048812	neuron projection morphogenesis	34	20.9513	0.00176649
GO:0007517	muscle organ development	22	12.5708	0.0039098
GO:0030182	neuron differentiation	4	1.79583	0.0849691
GO:0000902	cell morphogenesis	11	9.3782	0.330002
GO:0007409	axonogenesis	10	9.97681	0.553195
Cluster 25: regulation of protein localization
observed gene count: 20
expected gene count: 6.98376946008612
uncorrected p-value: 1.35101534887301e-06
GO ID	term	observed gene count	expected gene count	uncorrected p-value
GO:0051533	positive regulation of NFAT protein import into nucleus	11	3.19258	3.15092e-05
GO:0032880	regulation of protein localization	4	1.39675	0.0330447
GO:0046822	regulation of nucleocytoplasmic transport	1	0.199536	0.199536
GO:0042306	regulation of protein import into nucleus	2	1.19722	0.3435
GO:0042993	positive regulation of transcription factor import into nucleus	1	0.399073	0.359268
GO:0070201	regulation of establishment of protein localization	1	0.598609	0.487135
Cluster 26: protein targeting
observed gene count: 21
expected gene count: 7.58237827095065
uncorrected p-value: 1.55398500659451e-06
GO ID	term	observed gene count	expected gene count	uncorrected p-value
GO:0006606	protein import into nucleus	14	4.78887	3.94079e-05
GO:0000059	protein import into nucleus, docking	3	0.598609	0.00793815
GO:0006913	nucleocytoplasmic transport	5	1.59629	0.0102808
GO:0006605	protein targeting	3	1.19722	0.0982703
Cluster 27: RNA polyadenylation
observed gene count: 13
expected gene count: 3.59165286518715
uncorrected p-value: 2.40988918313751e-06
GO ID	term	observed gene count	expected gene count	uncorrected p-value
GO:0006378	mRNA polyadenylation	13	3.59165	2.40989e-06
GO:0043631	RNA polyadenylation	1	0.199536	0.199536
Cluster 28: histone exchange
observed gene count: 22
expected gene count: 8.38052335210335
uncorrected p-value: 2.9198855639051e-06
GO ID	term	observed gene count	expected gene count	uncorrected p-value
GO:0016573	histone acetylation	12	3.39212	8.81016e-06
GO:0006338	chromatin remodeling	16	6.38516	0.000137025
GO:0043486	histone exchange	2	0.598609	0.103536
GO:0034728	nucleosome organization	1	0.199536	0.199536
Cluster 29: chromatin silencing
observed gene count: 84
expected gene count: 52.8771116263663
uncorrected p-value: 3.45989380150918e-06
GO ID	term	observed gene count	expected gene count	uncorrected p-value
GO:0006342	chromatin silencing	21	7.38284	8.56051e-07
GO:0045892	negative regulation of transcription, DNA-dependent	33	16.362	1.91176e-05
GO:0045814	negative regulation of gene expression, epigenetic	1	0.199536	0.199536
GO:0010629	negative regulation of gene expression	14	11.5731	0.256673
GO:0000122	negative regulation of transcription from RNA polymerase II promoter	29	27.9351	0.444097
Cluster 30: regulation of cell growth
observed gene count: 25
expected gene count: 10.3758860549851
uncorrected p-value: 4.76056136956246e-06
GO ID	term	observed gene count	expected gene count	uncorrected p-value
GO:0045793	positive regulation of cell size	12	4.19026	0.000187418
GO:0030307	positive regulation of cell growth	8	3.79119	0.0228972
GO:0001558	regulation of cell growth	7	3.19258	0.0262718
GO:0046622	positive regulation of organ growth	4	1.59629	0.0558086
GO:0045927	positive regulation of growth	4	2.1949	0.16004
Cluster 31: mitotic cell cycle, embryonic
observed gene count: 15
expected gene count: 4.7888704869162
uncorrected p-value: 6.33718249786492e-06
GO ID	term	observed gene count	expected gene count	uncorrected p-value
GO:0045448	mitotic cell cycle, embryonic	7	1.79583	0.000307615
GO:0035186	syncytial blastoderm mitotic cell cycle	8	2.99304	0.00415705
Cluster 32: regulation of translation
observed gene count: 17
expected gene count: 6.18562437893342
uncorrected p-value: 1.78461316857257e-05
GO ID	term	observed gene count	expected gene count	uncorrected p-value
GO:0006417	regulation of translation	10	2.59397	1.55557e-05
GO:0017148	negative regulation of translation	11	4.3898	0.00154593
Cluster 33: negative regulation of translation
observed gene count: 18
expected gene count: 6.78423318979795
uncorrected p-value: 1.92991182987748e-05
GO ID	term	observed gene count	expected gene count	uncorrected p-value
GO:0007319	negative regulation of oskar mRNA translation	6	1.59629	0.00121143
GO:0017148	negative regulation of translation	11	4.3898	0.00154593
GO:0046011	regulation of oskar mRNA translation	4	1.59629	0.0558086
Cluster 34: stem cell division
observed gene count: 31
expected gene count: 15.1647565419013
uncorrected p-value: 2.47142761557928e-05
GO ID	term	observed gene count	expected gene count	uncorrected p-value
GO:0042078	germ-line stem cell division	12	4.19026	0.000187418
GO:0030718	germ-line stem cell maintenance	13	7.38284	0.0225055
GO:0008356	asymmetric cell division	8	4.78887	0.0880234
GO:0019827	stem cell maintenance	3	1.39675	0.14719
GO:0045596	negative regulation of cell differentiation	2	0.798145	0.180068
GO:0017145	stem cell division	2	0.997681	0.261757
GO:0048863	stem cell differentiation	1	0.997681	0.671423
Cluster 35: DNA amplification
observed gene count: 48
expected gene count: 27.33646902948
uncorrected p-value: 2.52249034929088e-05
GO ID	term	observed gene count	expected gene count	uncorrected p-value
GO:0007307	eggshell chorion gene amplification	13	3.59165	2.40989e-06
GO:0046843	dorsal appendage formation	17	6.78423	8.4887e-05
GO:0006277	DNA amplification	2	0.399073	0.0398041
GO:0030707	ovarian follicle cell development	14	10.775	0.174816
GO:0007304	chorion-containing eggshell formation	7	6.38516	0.461919
GO:0007306	eggshell chorion assembly	3	3.79119	0.761763
Cluster 36: telomere capping
observed gene count: 11
expected gene count: 3.1925803246108
uncorrected p-value: 3.15092461067909e-05
GO ID	term	observed gene count	expected gene count	uncorrected p-value
GO:0000723	telomere maintenance	10	2.39444	4.37917e-06
GO:0016233	telomere capping	6	1.79583	0.00301905
Cluster 37: cellularization
observed gene count: 25
expected gene count: 11.373567406426
uncorrected p-value: 3.48434888215282e-05
GO ID	term	observed gene count	expected gene count	uncorrected p-value
GO:0007279	pole cell formation	11	3.99073	0.000546629
GO:0007349	cellularization	17	7.98145	0.000948841
GO:0007277	pole cell development	4	1.39675	0.0330447
Cluster 38: regulation of GTPase activity
observed gene count: 20
expected gene count: 8.38052335210335
uncorrected p-value: 5.01365919145186e-05
GO ID	term	observed gene count	expected gene count	uncorrected p-value
GO:0032313	regulation of Rab GTPase activity	11	5.18794	0.0077193
GO:0051056	regulation of small GTPase mediated signal transduction	5	1.59629	0.0102808
GO:0046578	regulation of Ras protein signal transduction	3	1.19722	0.0982703
GO:0043087	regulation of GTPase activity	1	0.399073	0.359268
Cluster 39: G1/S transition of mitotic cell cycle
observed gene count: 12
expected gene count: 3.9907254057635
uncorrected p-value: 9.81357028171854e-05
GO ID	term	observed gene count	expected gene count	uncorrected p-value
GO:0000082	G1/S transition of mitotic cell cycle	8	2.79351	0.00234846
GO:0000086	G2/M transition of mitotic cell cycle	5	1.59629	0.0102808
Cluster 40: regulation of transcription, DNA-dependent
observed gene count: 122
expected gene count: 90.5894667108314
uncorrected p-value: 0.000182107754629042
GO ID	term	observed gene count	expected gene count	uncorrected p-value
GO:0006357	regulation of transcription from RNA polymerase II promoter	39	25.1416	0.00217405
GO:0006355	regulation of transcription, DNA-dependent	88	70.6358	0.0131376
Cluster 41: regulation of DNA replication
observed gene count: 8
expected gene count: 2.19489897316992
uncorrected p-value: 0.000229819473874234
GO ID	term	observed gene count	expected gene count	uncorrected p-value
GO:0008156	negative regulation of DNA replication	6	1.39675	0.000364903
GO:0006275	regulation of DNA replication	2	0.798145	0.180068
Cluster 42: metamorphosis
observed gene count: 96
expected gene count: 69.2390857899967
uncorrected p-value: 0.000290620663578398
GO ID	term	observed gene count	expected gene count	uncorrected p-value
GO:0007476	imaginal disc-derived wing morphogenesis	55	39.3086	0.00424632
GO:0007444	imaginal disc development	13	6.5847	0.00795993
GO:0007560	imaginal disc morphogenesis	3	1.19722	0.0982703
GO:0002165	instar larval or pupal development	4	2.1949	0.16004
GO:0035220	wing disc development	17	14.1671	0.238969
GO:0007552	metamorphosis	7	7.18331	0.59681
GO:0007472	wing disc morphogenesis	3	3.39212	0.688853
Cluster 43: egg activation
observed gene count: 11
expected gene count: 3.79118913547532
uncorrected p-value: 0.000299957765334421
GO ID	term	observed gene count	expected gene count	uncorrected p-value
GO:0007343	egg activation	7	1.79583	0.000307615
GO:0007338	single fertilization	3	0.798145	0.0270045
GO:0006997	nucleus organization	2	0.997681	0.261757
Cluster 44: methylation
observed gene count: 21
expected gene count: 9.97681351440874
uncorrected p-value: 0.000302701032523534
GO ID	term	observed gene count	expected gene count	uncorrected p-value
GO:0016571	histone methylation	12	2.59397	4.15413e-08
GO:0032259	methylation	6	1.79583	0.00301905
GO:0006479	protein amino acid methylation	2	1.39675	0.422024
GO:0016570	histone modification	1	0.798145	0.58949
Cluster 45: histone mRNA 3'-end processing
observed gene count: 7
expected gene count: 1.79582643259357
uncorrected p-value: 0.000307615474607895
GO ID	term	observed gene count	expected gene count	uncorrected p-value
GO:0006398	histone mRNA 3'-end processing	7	1.79583	0.000307615
GO:0008334	histone mRNA metabolic process	1	0.399073	0.359268
Cluster 46: protein stabilization
observed gene count: 15
expected gene count: 6.3851606492216
uncorrected p-value: 0.000538783376150802
GO ID	term	observed gene count	expected gene count	uncorrected p-value
GO:0031647	regulation of protein stability	8	2.39444	0.000568428
GO:0050821	protein stabilization	7	3.79119	0.0667603
GO:0000338	protein deneddylation	2	0.598609	0.103536
Cluster 47: regulation of RNA splicing
observed gene count: 23
expected gene count: 11.7726399470023
uncorrected p-value: 0.000579671048892448
GO ID	term	observed gene count	expected gene count	uncorrected p-value
GO:0000381	regulation of alternative nuclear mRNA splicing, via spliceosome	18	10.1763	0.00761055
GO:0048024	regulation of nuclear mRNA splicing, via spliceosome	4	1.59629	0.0558086
GO:0043484	regulation of RNA splicing	2	0.598609	0.103536
Cluster 48: axon cargo transport
observed gene count: 9
expected gene count: 2.99304405432262
uncorrected p-value: 0.000765947190945871
GO ID	term	observed gene count	expected gene count	uncorrected p-value
GO:0008088	axon cargo transport	6	1.99536	0.00627579
GO:0008089	anterograde axon cargo transport	3	0.798145	0.0270045
GO:0010970	microtubule-based transport	1	0.199536	0.199536
Cluster 49: regulation of organ growth
observed gene count: 26
expected gene count: 14.1670751904604
uncorrected p-value: 0.000807706191494303
GO ID	term	observed gene count	expected gene count	uncorrected p-value
GO:0042127	regulation of cell proliferation	16	6.18562	8.40154e-05
GO:0046621	negative regulation of organ growth	7	2.1949	0.00192951
GO:0008285	negative regulation of cell proliferation	13	6.98377	0.013816
GO:0046620	regulation of organ growth	6	3.19258	0.0808154
GO:0045926	negative regulation of growth	1	1.99536	0.892082
Cluster 50: cytokinesis after meiosis I
observed gene count: 7
expected gene count: 1.99536270288175
uncorrected p-value: 0.000847889640834196
GO ID	term	observed gene count	expected gene count	uncorrected p-value
GO:0007110	cytokinesis after meiosis I	7	1.99536	0.00084789
GO:0007111	cytokinesis after meiosis II	6	1.79583	0.00301905
Cluster 51: lipid phosphorylation
observed gene count: 10
expected gene count: 3.59165286518715
uncorrected p-value: 0.000886748388420931
GO ID	term	observed gene count	expected gene count	uncorrected p-value
GO:0046854	phosphoinositide phosphorylation	10	3.39212	0.000479707
GO:0048015	phosphoinositide-mediated signaling	4	0.997681	0.00665156
GO:0046834	lipid phosphorylation	1	0.399073	0.359268
Cluster 52: hemopoiesis
observed gene count: 11
expected gene count: 4.19026167605167
uncorrected p-value: 0.00094176159315273
GO ID	term	observed gene count	expected gene count	uncorrected p-value
GO:0030097	hemopoiesis	11	4.19026	0.000941762
Cluster 53: transcription from RNA polymerase III promoter
observed gene count: 8
expected gene count: 2.59397151374627
uncorrected p-value: 0.00121923647551018
GO ID	term	observed gene count	expected gene count	uncorrected p-value
GO:0042796	snRNA transcription from RNA polymerase III promoter	4	0.798145	0.00158269
GO:0006383	transcription from RNA polymerase III promoter	4	1.79583	0.0849691
Cluster 54: wing disc pattern formation
observed gene count: 26
expected gene count: 14.5661477310368
uncorrected p-value: 0.00129742782944528
GO ID	term	observed gene count	expected gene count	uncorrected p-value
GO:0048190	wing disc dorsal/ventral pattern formation	15	9.3782	0.0357324
GO:0035222	wing disc pattern formation	6	2.79351	0.0433308
GO:0007447	imaginal disc pattern formation	5	2.1949	0.0498976
Cluster 55: pronuclear fusion
observed gene count: 5
expected gene count: 1.19721762172905
uncorrected p-value: 0.00157848645559759
GO ID	term	observed gene count	expected gene count	uncorrected p-value
GO:0007344	pronuclear fusion	5	1.19722	0.00157849
Cluster 56: protein amino acid glycosylation
observed gene count: 18
expected gene count: 8.97913216296787
uncorrected p-value: 0.00157960380437465
GO ID	term	observed gene count	expected gene count	uncorrected p-value
GO:0006487	protein amino acid N-linked glycosylation	7	2.1949	0.00192951
GO:0009101	glycoprotein biosynthetic process	2	0.399073	0.0398041
GO:0006486	protein amino acid glycosylation	10	6.38516	0.0884812
Cluster 57: negative regulation of protein import into nucleus
observed gene count: 4
expected gene count: 0.7981450811527
uncorrected p-value: 0.00158268532237754
GO ID	term	observed gene count	expected gene count	uncorrected p-value
GO:0042308	negative regulation of protein import into nucleus	3	0.598609	0.00793815
GO:0042992	negative regulation of transcription factor import into nucleus	1	0.199536	0.199536
Cluster 58: positive regulation of protein complex assembly
observed gene count: 4
expected gene count: 0.7981450811527
uncorrected p-value: 0.00158268532237754
GO ID	term	observed gene count	expected gene count	uncorrected p-value
GO:0031334	positive regulation of protein complex assembly	2	0.399073	0.0398041
GO:0060261	positive regulation of transcription initiation from RNA polymerase II promoter	2	0.399073	0.0398041
Cluster 59: rhabdomere development
observed gene count: 27
expected gene count: 15.5638290824776
uncorrected p-value: 0.00171864092858704
GO ID	term	observed gene count	expected gene count	uncorrected p-value
GO:0001751	compound eye photoreceptor cell differentiation	10	4.98841	0.0169794
GO:0042052	rhabdomere development	11	6.5847	0.0499044
GO:0042461	photoreceptor cell development	2	0.598609	0.103536
GO:0042051	compound eye photoreceptor development	6	4.58933	0.303203
GO:0042462	eye photoreceptor cell development	1	0.399073	0.359268
Cluster 60: proteoglycan biosynthetic process
observed gene count: 16
expected gene count: 7.78191454123882
uncorrected p-value: 0.00207661524397034
GO ID	term	observed gene count	expected gene count	uncorrected p-value
GO:0030166	proteoglycan biosynthetic process	4	0.798145	0.00158269
GO:0015012	heparan sulfate proteoglycan biosynthetic process	7	2.39444	0.00383503
GO:0006024	glycosaminoglycan biosynthetic process	4	1.39675	0.0330447
GO:0030203	glycosaminoglycan metabolic process	2	0.399073	0.0398041
GO:0006044	N-acetylglucosamine metabolic process	4	1.59629	0.0558086
GO:0030206	chondroitin sulfate biosynthetic process	4	1.59629	0.0558086
GO:0008101	decapentaplegic receptor signaling pathway	4	2.1949	0.16004
GO:0050650	chondroitin sulfate proteoglycan biosynthetic process	1	0.199536	0.199536
GO:0015014	heparan sulfate proteoglycan biosynthetic process, polysaccharide chain biosynthetic process	1	0.798145	0.58949
Cluster 61: cytoplasmic transport
observed gene count: 12
expected gene count: 5.18794302749255
uncorrected p-value: 0.00227465697529829
GO ID	term	observed gene count	expected gene count	uncorrected p-value
GO:0016482	cytoplasmic transport	3	0.598609	0.00793815
GO:0007300	ovarian nurse cell to oocyte transport	6	2.59397	0.0296569
GO:0007303	cytoplasmic transport, nurse cell to oocyte	6	2.99304	0.0603615
Cluster 62: growth
observed gene count: 21
expected gene count: 11.373567406426
uncorrected p-value: 0.00227545744935543
GO ID	term	observed gene count	expected gene count	uncorrected p-value
GO:0008361	regulation of cell size	7	2.99304	0.0177847
GO:0001558	regulation of cell growth	7	3.19258	0.0262718
GO:0016049	cell growth	6	2.79351	0.0433308
GO:0048589	developmental growth	1	0.798145	0.58949
GO:0040007	growth	3	4.19026	0.820151
Cluster 63: apoptosis
observed gene count: 21
expected gene count: 11.373567406426
uncorrected p-value: 0.00227545744935543
GO ID	term	observed gene count	expected gene count	uncorrected p-value
GO:0006915	apoptosis	16	8.7796	0.00839076
GO:0012501	programmed cell death	4	2.99304	0.350073
GO:0008219	cell death	2	2.1949	0.676604
Cluster 64: positive regulation of gene expression
observed gene count: 62
expected gene count: 44.496588274263
uncorrected p-value: 0.00279736898677121
GO ID	term	observed gene count	expected gene count	uncorrected p-value
GO:0045893	positive regulation of transcription, DNA-dependent	29	15.1648	0.000183526
GO:0045944	positive regulation of transcription from RNA polymerase II promoter	41	33.123	0.0774079
GO:0010628	positive regulation of gene expression	4	3.39212	0.449208
Cluster 65: mitochondrial DNA replication
observed gene count: 6
expected gene count: 1.79582643259357
uncorrected p-value: 0.00301905129353338
GO ID	term	observed gene count	expected gene count	uncorrected p-value
GO:0000002	mitochondrial genome maintenance	4	0.997681	0.00665156
GO:0006264	mitochondrial DNA replication	2	0.997681	0.261757
Cluster 66: regulation of axonogenesis
observed gene count: 19
expected gene count: 10.1763497846969
uncorrected p-value: 0.00312400356043024
GO ID	term	observed gene count	expected gene count	uncorrected p-value
GO:0050770	regulation of axonogenesis	7	3.19258	0.0262718
GO:0050773	regulation of dendrite development	3	0.997681	0.057534
GO:0048814	regulation of dendrite morphogenesis	6	3.39212	0.104636
GO:0050767	regulation of neurogenesis	3	1.59629	0.202018
Cluster 67: DNA duplex unwinding
observed gene count: 7
expected gene count: 2.3944352434581
uncorrected p-value: 0.00383503005134025
GO ID	term	observed gene count	expected gene count	uncorrected p-value
GO:0032508	DNA duplex unwinding	3	0.598609	0.00793815
GO:0006265	DNA topological change	3	1.39675	0.14719
GO:0006268	DNA unwinding during replication	1	0.399073	0.359268
Cluster 68: cell motion
observed gene count: 37
expected gene count: 24.3434249751573
uncorrected p-value: 0.00407228620561578
GO ID	term	observed gene count	expected gene count	uncorrected p-value
GO:0007298	border follicle cell migration	29	18.5569	0.00670755
GO:0007297	ovarian follicle cell migration	3	2.1949	0.381057
GO:0016477	cell migration	5	4.58933	0.497099
GO:0006928	cell motion	1	0.798145	0.58949
Cluster 69: phototaxis
observed gene count: 8
expected gene count: 2.99304405432262
uncorrected p-value: 0.00415705271831518
GO ID	term	observed gene count	expected gene count	uncorrected p-value
GO:0042331	phototaxis	8	2.99304	0.00415705
Cluster 70: RNA catabolic process
observed gene count: 9
expected gene count: 3.59165286518715
uncorrected p-value: 0.00416015728481169
GO ID	term	observed gene count	expected gene count	uncorrected p-value
GO:0000184	nuclear-transcribed mRNA catabolic process, nonsense-mediated decay	7	2.39444	0.00383503
GO:0006402	mRNA catabolic process	3	0.997681	0.057534
GO:0006401	RNA catabolic process	1	0.399073	0.359268
GO:0000956	nuclear-transcribed mRNA catabolic process	1	0.598609	0.487135
Cluster 71: exocytosis
observed gene count: 50
expected gene count: 35.1183835707188
uncorrected p-value: 0.004277990776745
GO ID	term	observed gene count	expected gene count	uncorrected p-value
GO:0016080	synaptic vesicle targeting	10	2.1949	8.90718e-07
GO:0016081	synaptic vesicle docking during exocytosis	15	4.58933	2.91572e-06
GO:0007269	neurotransmitter secretion	32	18.3573	0.000615878
GO:0006887	exocytosis	8	3.19258	0.00687264
GO:0006904	vesicle docking during exocytosis	4	1.39675	0.0330447
GO:0007267	cell-cell signaling	3	1.39675	0.14719
GO:0048278	vesicle docking	1	0.199536	0.199536
GO:0019226	transmission of nerve impulse	1	0.598609	0.487135
GO:0016079	synaptic vesicle exocytosis	3	4.19026	0.820151
GO:0007268	synaptic transmission	7	9.3782	0.855096
GO:0048489	synaptic vesicle transport	1	2.1949	0.91363
GO:0006836	neurotransmitter transport	2	4.78887	0.966662
Cluster 72: torso signaling pathway
observed gene count: 17
expected gene count: 8.97913216296787
uncorrected p-value: 0.00428237555217392
GO ID	term	observed gene count	expected gene count	uncorrected p-value
GO:0008293	torso signaling pathway	13	6.78423	0.0105769
GO:0007362	terminal region determination	11	5.38748	0.010717
GO:0007354	zygotic determination of anterior/posterior axis, embryo	1	1.59629	0.831526
Cluster 73: cell growth
observed gene count: 24
expected gene count: 14.1670751904604
uncorrected p-value: 0.00428315872606349
GO ID	term	observed gene count	expected gene count	uncorrected p-value
GO:0007394	dorsal closure, elongation of leading edge cells	6	2.39444	0.0191476
GO:0016049	cell growth	6	2.79351	0.0433308
GO:0007254	JNK cascade	8	4.98841	0.107788
GO:0000165	MAPKKK cascade	4	1.99536	0.119988
GO:0007243	protein kinase cascade	1	0.199536	0.199536
GO:0031098	stress-activated protein kinase signaling pathway	1	0.399073	0.359268
GO:0048589	developmental growth	1	0.798145	0.58949
GO:0016476	regulation of embryonic cell shape	3	3.39212	0.688853
Cluster 74: lipid biosynthetic process
observed gene count: 20
expected gene count: 11.1740311361378
uncorrected p-value: 0.00433535622912971
GO ID	term	observed gene count	expected gene count	uncorrected p-value
GO:0008654	phospholipid biosynthetic process	7	2.79351	0.0114251
GO:0006506	GPI anchor biosynthetic process	8	3.59165	0.0160013
GO:0006505	GPI anchor metabolic process	1	0.399073	0.359268
GO:0008610	lipid biosynthetic process	1	0.399073	0.359268
GO:0006644	phospholipid metabolic process	2	1.99536	0.622868
GO:0006497	protein amino acid lipidation	1	0.997681	0.671423
Cluster 75: induction of apoptosis
observed gene count: 38
expected gene count: 25.3411063265982
uncorrected p-value: 0.00467731514967722
GO ID	term	observed gene count	expected gene count	uncorrected p-value
GO:0043067	regulation of programmed cell death	5	1.39675	0.00461244
GO:0008630	DNA damage response, signal transduction resulting in induction of apoptosis	6	1.99536	0.00627579
GO:0043066	negative regulation of apoptosis	15	10.3759	0.0800149
GO:0006917	induction of apoptosis	6	3.79119	0.161604
GO:0042981	regulation of apoptosis	6	3.99073	0.194146
GO:0010941	regulation of cell death	2	1.19722	0.3435
GO:0043068	positive regulation of programmed cell death	1	0.997681	0.671423
GO:0060548	negative regulation of cell death	2	2.1949	0.676604
GO:0043069	negative regulation of programmed cell death	1	1.39675	0.789505
GO:0043065	positive regulation of apoptosis	1	1.79583	0.865161
Cluster 76: response to nutrient
observed gene count: 18
expected gene count: 9.77727724412057
uncorrected p-value: 0.00472231055847011
GO ID	term	observed gene count	expected gene count	uncorrected p-value
GO:0046621	negative regulation of organ growth	7	2.1949	0.00192951
GO:0030308	negative regulation of cell growth	5	1.59629	0.0102808
GO:0007584	response to nutrient	5	1.59629	0.0102808
GO:0045792	negative regulation of cell size	8	3.39212	0.0107386
GO:0046627	negative regulation of insulin receptor signaling pathway	4	1.39675	0.0330447
GO:0045926	negative regulation of growth	1	1.99536	0.892082
Cluster 77: activation of caspase activity
observed gene count: 9
expected gene count: 3.79118913547532
uncorrected p-value: 0.00651943466847685
GO ID	term	observed gene count	expected gene count	uncorrected p-value
GO:0006919	activation of caspase activity	6	2.79351	0.0433308
GO:0043281	regulation of caspase activity	2	0.598609	0.103536
GO:0043280	positive regulation of caspase activity	1	0.199536	0.199536
Cluster 78: meiotic chromosome separation
observed gene count: 4
expected gene count: 0.997681351440874
uncorrected p-value: 0.00665155729912865
GO ID	term	observed gene count	expected gene count	uncorrected p-value
GO:0000712	resolution of meiotic joint molecules as recombinants	3	0.798145	0.0270045
GO:0051307	meiotic chromosome separation	1	0.199536	0.199536
Cluster 79: germ-line stem cell maintenance
observed gene count: 22
expected gene count: 13.1693938390195
uncorrected p-value: 0.00731744636849071
GO ID	term	observed gene count	expected gene count	uncorrected p-value
GO:0030718	germ-line stem cell maintenance	13	7.38284	0.0225055
GO:0007179	transforming growth factor beta receptor signaling pathway	8	4.19026	0.0424105
GO:0045887	positive regulation of synaptic growth at neuromuscular junction	6	2.99304	0.0603615
GO:0048639	positive regulation of developmental growth	1	0.199536	0.199536
GO:0051965	positive regulation of synaptogenesis	1	0.199536	0.199536
GO:0045705	negative regulation of salivary gland boundary specification	3	1.59629	0.202018
Cluster 80: gastrulation
observed gene count: 16
expected gene count: 8.7795958926797
uncorrected p-value: 0.00839076101527466
GO ID	term	observed gene count	expected gene count	uncorrected p-value
GO:0010004	gastrulation involving germ band extension	6	2.1949	0.0114913
GO:0007369	gastrulation	10	4.98841	0.0169794
GO:0007374	posterior midgut invagination	3	0.997681	0.057534
GO:0007377	germ-band extension	3	1.99536	0.32078
GO:0007370	ventral furrow formation	4	2.99304	0.350073
Cluster 81: protein ubiquitination
observed gene count: 14
expected gene count: 7.38284200066247
uncorrected p-value: 0.00900898731063554
GO ID	term	observed gene count	expected gene count	uncorrected p-value
GO:0016567	protein ubiquitination	14	7.38284	0.00900899
Cluster 82: spindle stabilization
observed gene count: 9
expected gene count: 3.9907254057635
uncorrected p-value: 0.00978282477199362
GO ID	term	observed gene count	expected gene count	uncorrected p-value
GO:0000916	contractile ring contraction involved in cytokinesis	7	1.79583	0.000307615
GO:0070507	regulation of microtubule cytoskeleton organization	2	0.399073	0.0398041
GO:0043146	spindle stabilization	1	0.199536	0.199536
Cluster 83: regulation of growth
observed gene count: 16
expected gene count: 8.97913216296787
uncorrected p-value: 0.0106574564431923
GO ID	term	observed gene count	expected gene count	uncorrected p-value
GO:0001558	regulation of cell growth	7	3.19258	0.0262718
GO:0046620	regulation of organ growth	6	3.19258	0.0808154
GO:0040008	regulation of growth	4	3.99073	0.58664
Cluster 84: regulation of cytoskeleton organization
observed gene count: 11
expected gene count: 5.38747929778072
uncorrected p-value: 0.0107170374083574
GO ID	term	observed gene count	expected gene count	uncorrected p-value
GO:0008064	regulation of actin polymerization or depolymerization	6	1.59629	0.00121143
GO:0051493	regulation of cytoskeleton organization	3	0.997681	0.057534
GO:0030833	regulation of actin filament polymerization	1	1.19722	0.737008
GO:0032956	regulation of actin cytoskeleton organization	1	1.39675	0.789505
Cluster 85: oogenesis
observed gene count: 106
expected gene count: 86.3992050347797
uncorrected p-value: 0.0111650448064816
GO ID	term	observed gene count	expected gene count	uncorrected p-value
GO:0048477	oogenesis	92	39.7077	3.70477e-17
GO:0007281	germ cell development	18	5.98609	1.72861e-06
GO:0007276	gamete generation	2	0.798145	0.180068
GO:0032504	multicellular organism reproduction	4	43.4989	1
Cluster 86: positive regulation of translation
observed gene count: 6
expected gene count: 2.19489897316992
uncorrected p-value: 0.0114913313800637
GO ID	term	observed gene count	expected gene count	uncorrected p-value
GO:0045727	positive regulation of translation	6	1.99536	0.00627579
Cluster 87: regulation of multicellular organism growth
observed gene count: 12
expected gene count: 6.18562437893342
uncorrected p-value: 0.0124059056210765
GO ID	term	observed gene count	expected gene count	uncorrected p-value
GO:0040014	regulation of multicellular organism growth	6	2.99304	0.0603615
GO:0040018	positive regulation of multicellular organism growth	7	4.3898	0.131547
Cluster 88: eye development
observed gene count: 71
expected gene count: 55.4710831401126
uncorrected p-value: 0.0131104119568123
GO ID	term	observed gene count	expected gene count	uncorrected p-value
GO:0001754	eye photoreceptor cell differentiation	4	0.997681	0.00665156
GO:0001751	compound eye photoreceptor cell differentiation	10	4.98841	0.0169794
GO:0048749	compound eye development	32	22.9467	0.0258582
GO:0007465	R7 cell fate commitment	4	2.59397	0.251191
GO:0045500	sevenless signaling pathway	3	1.79583	0.260543
GO:0007423	sensory organ development	12	11.9722	0.548019
GO:0001752	compound eye photoreceptor fate commitment	2	1.79583	0.562451
GO:0046530	photoreceptor cell differentiation	1	0.798145	0.58949
GO:0001745	compound eye morphogenesis	15	16.5615	0.708328
GO:0001654	eye development	2	2.39444	0.723918
GO:0048663	neuron fate commitment	1	1.19722	0.737008
GO:0048592	eye morphogenesis	1	1.59629	0.831526
GO:0045466	R7 cell differentiation	1	1.79583	0.865161
Cluster 89: actin filament organization
observed gene count: 31
expected gene count: 21.1508446505465
uncorrected p-value: 0.0139747408614649
GO ID	term	observed gene count	expected gene count	uncorrected p-value
GO:0007015	actin filament organization	21	13.768	0.0250962
GO:0030036	actin cytoskeleton organization	12	9.97681	0.286213
GO:0030029	actin filament-based process	1	1.19722	0.737008
Cluster 90: glycolipid metabolic process
observed gene count: 8
expected gene count: 3.59165286518715
uncorrected p-value: 0.0160013107846519
GO ID	term	observed gene count	expected gene count	uncorrected p-value
GO:0006688	glycosphingolipid biosynthetic process	4	0.798145	0.00158269
GO:0009247	glycolipid biosynthetic process	2	0.798145	0.180068
GO:0006664	glycolipid metabolic process	1	0.199536	0.199536
GO:0030148	sphingolipid biosynthetic process	1	0.199536	0.199536
GO:0006643	membrane lipid metabolic process	1	0.199536	0.199536
GO:0006665	sphingolipid metabolic process	1	1.79583	0.865161
Cluster 91: molybdopterin cofactor metabolic process
observed gene count: 4
expected gene count: 1.19721762172905
uncorrected p-value: 0.0167976989861908
GO ID	term	observed gene count	expected gene count	uncorrected p-value
GO:0006777	Mo-molybdopterin cofactor biosynthetic process	4	1.19722	0.0167977
GO:0043545	molybdopterin cofactor metabolic process	1	0.199536	0.199536
Cluster 92: regulation of synaptic transmission
observed gene count: 4
expected gene count: 1.19721762172905
uncorrected p-value: 0.0167976989861908
GO ID	term	observed gene count	expected gene count	uncorrected p-value
GO:0050804	regulation of synaptic transmission	4	1.19722	0.0167977
Cluster 93: lipid oxidation
observed gene count: 10
expected gene count: 4.98840675720437
uncorrected p-value: 0.0169793579169705
GO ID	term	observed gene count	expected gene count	uncorrected p-value
GO:0006635	fatty acid beta-oxidation	5	2.39444	0.0718619
GO:0030258	lipid modification	2	0.598609	0.103536
GO:0034440	lipid oxidation	1	0.199536	0.199536
GO:0006631	fatty acid metabolic process	2	1.19722	0.3435
Cluster 94: dorsal closure
observed gene count: 47
expected gene count: 35.1183835707188
uncorrected p-value: 0.0178080919527908
GO ID	term	observed gene count	expected gene count	uncorrected p-value
GO:0001700	embryonic development via the syncytial blastoderm	15	9.97681	0.0593775
GO:0007391	dorsal closure	24	17.7587	0.0670387
GO:0016331	morphogenesis of embryonic epithelium	3	1.59629	0.202018
GO:0002009	morphogenesis of an epithelium	6	4.98841	0.381004
GO:0060429	epithelium development	1	0.598609	0.487135
GO:0009792	embryonic development ending in birth or egg hatching	2	1.99536	0.622868
GO:0048598	embryonic morphogenesis	1	1.99536	0.892082
Cluster 95: vesicle coating
observed gene count: 15
expected gene count: 8.7795958926797
uncorrected p-value: 0.0197741553714937
GO ID	term	observed gene count	expected gene count	uncorrected p-value
GO:0016183	synaptic vesicle coating	6	2.39444	0.0191476
GO:0006901	vesicle coating	5	1.79583	0.019358
GO:0048488	synaptic vesicle endocytosis	9	5.98609	0.127024
GO:0016185	synaptic vesicle budding from presynaptic membrane	1	0.399073	0.359268
GO:0016050	vesicle organization	1	0.598609	0.487135
Cluster 96: gene silencing by miRNA
observed gene count: 10
expected gene count: 5.18794302749255
uncorrected p-value: 0.0227668924301497
GO ID	term	observed gene count	expected gene count	uncorrected p-value
GO:0031053	primary microRNA processing	2	0.399073	0.0398041
GO:0035195	gene silencing by miRNA	8	4.3898	0.0553465
GO:0030422	RNA interference, production of siRNA	4	1.59629	0.0558086
GO:0035196	gene silencing by miRNA, production of miRNAs	1	0.399073	0.359268
Cluster 97: positive regulation of cell cycle
observed gene count: 8
expected gene count: 3.79118913547532
uncorrected p-value: 0.0228972206873245
GO ID	term	observed gene count	expected gene count	uncorrected p-value
GO:0045930	negative regulation of mitotic cell cycle	4	0.997681	0.00665156
GO:0045931	positive regulation of mitotic cell cycle	3	1.39675	0.14719
GO:0045787	positive regulation of cell cycle	2	1.59629	0.49536
Cluster 98: inositol phosphate dephosphorylation
observed gene count: 3
expected gene count: 0.7981450811527
uncorrected p-value: 0.0270045354390778
GO ID	term	observed gene count	expected gene count	uncorrected p-value
GO:0046855	inositol phosphate dephosphorylation	3	0.798145	0.0270045
Cluster 99: sperm axoneme assembly
observed gene count: 8
expected gene count: 3.9907254057635
uncorrected p-value: 0.0316401512975452
GO ID	term	observed gene count	expected gene count	uncorrected p-value
GO:0001578	microtubule bundle formation	4	1.59629	0.0558086
GO:0007288	sperm axoneme assembly	4	2.39444	0.204129
Cluster 100: JNK cascade
observed gene count: 21
expected gene count: 14.1670751904604
uncorrected p-value: 0.0340250243859248
GO ID	term	observed gene count	expected gene count	uncorrected p-value
GO:0001932	regulation of protein amino acid phosphorylation	3	1.19722	0.0982703
GO:0007254	JNK cascade	8	4.98841	0.107788
GO:0000165	MAPKKK cascade	4	1.99536	0.119988
GO:0007243	protein kinase cascade	1	0.199536	0.199536
GO:0043507	positive regulation of JUN kinase activity	1	0.199536	0.199536
GO:0032147	activation of protein kinase activity	1	0.199536	0.199536
GO:0042325	regulation of phosphorylation	3	1.59629	0.202018
GO:0000187	activation of MAPK activity	2	1.19722	0.3435
GO:0031098	stress-activated protein kinase signaling pathway	1	0.399073	0.359268
Cluster 101: neuroblast proliferation
observed gene count: 17
expected gene count: 10.9744948658496
uncorrected p-value: 0.0357345245495069
GO ID	term	observed gene count	expected gene count	uncorrected p-value
GO:0007405	neuroblast proliferation	9	3.99073	0.00978282
GO:0055059	asymmetric neuroblast division	8	5.98609	0.236985
GO:0048103	somatic stem cell division	1	1.79583	0.865161
Cluster 102: regulation of histone acetylation
observed gene count: 2
expected gene count: 0.39907254057635
uncorrected p-value: 0.039804141369928
GO ID	term	observed gene count	expected gene count	uncorrected p-value
GO:0035065	regulation of histone acetylation	2	0.399073	0.0398041
Cluster 103: determination of adult life span
observed gene count: 38
expected gene count: 28.9327591917854
uncorrected p-value: 0.0400392183605154
GO ID	term	observed gene count	expected gene count	uncorrected p-value
GO:0008340	determination of adult life span	38	28.7332	0.0363204
Cluster 104: nuclear migration
observed gene count: 8
expected gene count: 4.19026167605167
uncorrected p-value: 0.0424104960247781
GO ID	term	observed gene count	expected gene count	uncorrected p-value
GO:0007312	oocyte nucleus migration during oocyte axis specification	5	1.39675	0.00461244
GO:0040023	establishment of nucleus localization	1	0.399073	0.359268
GO:0051663	oocyte nucleus localization involved in oocyte dorsal/ventral axis specification	1	0.399073	0.359268
GO:0051647	nucleus localization	1	0.598609	0.487135
GO:0007097	nuclear migration	1	1.19722	0.737008
Cluster 105: ommatidial rotation
observed gene count: 36
expected gene count: 27.33646902948
uncorrected p-value: 0.0431013371709262
GO ID	term	observed gene count	expected gene count	uncorrected p-value
GO:0007163	establishment or maintenance of cell polarity	11	6.38516	0.0403026
GO:0001737	establishment of imaginal disc-derived wing hair orientation	9	4.98841	0.046023
GO:0016318	ommatidial rotation	8	5.58702	0.179877
GO:0035317	imaginal disc-derived wing hair organization	5	3.59165	0.281824
GO:0001736	establishment of planar polarity	7	5.98609	0.390496
GO:0001738	morphogenesis of a polarized epithelium	4	3.19258	0.400009
GO:0042067	establishment of ommatidial polarity	6	5.78655	0.534202
GO:0008544	epidermis development	3	2.79351	0.550282
GO:0035316	non-sensory hair organization	1	0.798145	0.58949
GO:0009913	epidermal cell differentiation	1	1.19722	0.737008
GO:0007164	establishment of tissue polarity	1	1.39675	0.789505
GO:0007398	ectoderm development	2	4.58933	0.959826
Cluster 106: regulation of JNK cascade
observed gene count: 9
expected gene count: 4.98840675720437
uncorrected p-value: 0.0460230292834744
GO ID	term	observed gene count	expected gene count	uncorrected p-value
GO:0043408	regulation of MAPKKK cascade	1	0.199536	0.199536
GO:0043409	negative regulation of MAPKKK cascade	1	0.199536	0.199536
GO:0046328	regulation of JNK cascade	3	1.79583	0.260543
GO:0046329	negative regulation of JNK cascade	4	2.79351	0.30017
Cluster 107: locomotor rhythm
observed gene count: 20
expected gene count: 13.7680026498841
uncorrected p-value: 0.0462346742619274
GO ID	term	observed gene count	expected gene count	uncorrected p-value
GO:0045475	locomotor rhythm	14	8.38052	0.0290337
GO:0007623	circadian rhythm	10	6.5847	0.105254
GO:0007622	rhythmic behavior	3	2.59397	0.496686
GO:0007626	locomotory behavior	2	2.59397	0.765233
GO:0048512	circadian behavior	1	1.39675	0.789505
Cluster 108: Notch signaling pathway
observed gene count: 22
expected gene count: 15.5638290824776
uncorrected p-value: 0.0501030224808341
GO ID	term	observed gene count	expected gene count	uncorrected p-value
GO:0045746	negative regulation of Notch signaling pathway	11	5.38748	0.010717
GO:0008593	regulation of Notch signaling pathway	9	4.58933	0.0268623
GO:0007219	Notch signaling pathway	10	8.58006	0.350306
Cluster 109: memory
observed gene count: 24
expected gene count: 17.5591917853594
uncorrected p-value: 0.0598722372346746
GO ID	term	observed gene count	expected gene count	uncorrected p-value
GO:0007616	long-term memory	16	10.3759	0.0424788
GO:0007611	learning or memory	11	7.78191	0.138643
GO:0007613	memory	2	3.59165	0.900257
Cluster 110: spermatogenesis
observed gene count: 33
expected gene count: 26.1392514077509
uncorrected p-value: 0.0839295079061872
GO ID	term	observed gene count	expected gene count	uncorrected p-value
GO:0007283	spermatogenesis	23	18.9559	0.179435
GO:0007286	spermatid development	11	8.18099	0.179929
Cluster 111: positive regulation of Notch signaling pathway
observed gene count: 10
expected gene count: 6.3851606492216
uncorrected p-value: 0.0884812082482698
GO ID	term	observed gene count	expected gene count	uncorrected p-value
GO:0045747	positive regulation of Notch signaling pathway	10	6.38516	0.0884812
Cluster 112: cell motion
observed gene count: 45
expected gene count: 37.1137462736005
uncorrected p-value: 0.0885020028101072
GO ID	term	observed gene count	expected gene count	uncorrected p-value
GO:0007411	axon guidance	38	30.9281	0.0943135
GO:0007409	axonogenesis	10	9.97681	0.553195
GO:0006928	cell motion	1	0.798145	0.58949
Cluster 113: sterol regulatory element binding protein cleavage
observed gene count: 3
expected gene count: 1.19721762172905
uncorrected p-value: 0.0982703063118124
GO ID	term	observed gene count	expected gene count	uncorrected p-value
GO:0035103	sterol regulatory element binding protein cleavage	3	0.798145	0.0270045
Cluster 114: imaginal disc-derived leg morphogenesis
observed gene count: 24
expected gene count: 18.7564094070884
uncorrected p-value: 0.111693798378747
GO ID	term	observed gene count	expected gene count	uncorrected p-value
GO:0007480	imaginal disc-derived leg morphogenesis	17	10.9745	0.0357345
GO:0008586	imaginal disc-derived wing vein morphogenesis	11	7.98145	0.158612
Cluster 115: ovarian follicle cell stalk formation
observed gene count: 9
expected gene count: 5.98608810864525
uncorrected p-value: 0.12702360691885
GO ID	term	observed gene count	expected gene count	uncorrected p-value
GO:0030708	germarium-derived female germ-line cyst encapsulation	5	1.99536	0.0324402
GO:0030713	ovarian follicle cell stalk formation	6	3.39212	0.104636
GO:0016333	morphogenesis of follicular epithelium	2	1.99536	0.622868
Cluster 116: response to heat
observed gene count: 18
expected gene count: 13.7680026498841
uncorrected p-value: 0.131134361249398
GO ID	term	observed gene count	expected gene count	uncorrected p-value
GO:0009408	response to heat	18	13.3689	0.105418
Cluster 117: regulation of synapse organization
observed gene count: 20
expected gene count: 15.5638290824776
uncorrected p-value: 0.132840918715928
GO ID	term	observed gene count	expected gene count	uncorrected p-value
GO:0008582	regulation of synaptic growth at neuromuscular junction	9	4.58933	0.0268623
GO:0045886	negative regulation of synaptic growth at neuromuscular junction	7	4.3898	0.131547
GO:0051964	negative regulation of synaptogenesis	1	0.199536	0.199536
GO:0050803	regulation of synapse structure and activity	3	2.79351	0.550282
GO:0050807	regulation of synapse organization	2	1.99536	0.622868
Cluster 118: vesicle organization
observed gene count: 12
expected gene count: 8.7795958926797
uncorrected p-value: 0.151983563141208
GO ID	term	observed gene count	expected gene count	uncorrected p-value
GO:0006727	ommochrome biosynthetic process	9	3.39212	0.00252345
GO:0008057	eye pigment granule organization	5	1.99536	0.0324402
GO:0008055	ocellus pigment biosynthetic process	1	0.199536	0.199536
GO:0006726	eye pigment biosynthetic process	4	2.59397	0.251191
GO:0016050	vesicle organization	1	0.598609	0.487135
GO:0048066	pigmentation during development	1	2.59397	0.94468
Cluster 119: vacuolar transport
observed gene count: 6
expected gene count: 3.79118913547532
uncorrected p-value: 0.161603772205494
GO ID	term	observed gene count	expected gene count	uncorrected p-value
GO:0007034	vacuolar transport	2	0.598609	0.103536
GO:0048072	compound eye pigmentation	4	2.39444	0.204129
GO:0007041	lysosomal transport	1	0.997681	0.671423
Cluster 120: open tracheal system development
observed gene count: 33
expected gene count: 27.9350778403445
uncorrected p-value: 0.165610247511223
GO ID	term	observed gene count	expected gene count	uncorrected p-value
GO:0007430	terminal branching, open tracheal system	6	3.19258	0.0808154
GO:0007424	open tracheal system development	23	21.1508	0.363054
GO:0060446	branching involved in open tracheal system development	2	1.59629	0.49536
GO:0007428	primary branching, open tracheal system	3	2.99304	0.600334
GO:0035147	branch fusion, open tracheal system	4	4.19026	0.627763
GO:0001763	morphogenesis of a branching structure	1	1.39675	0.789505
Cluster 121: histone demethylation
observed gene count: 2
expected gene count: 0.7981450811527
uncorrected p-value: 0.18006772137428
GO ID	term	observed gene count	expected gene count	uncorrected p-value
GO:0016577	histone demethylation	2	0.798145	0.180068
Cluster 122: carbohydrate transport
observed gene count: 2
expected gene count: 0.7981450811527
uncorrected p-value: 0.18006772137428
GO ID	term	observed gene count	expected gene count	uncorrected p-value
GO:0015781	pyrimidine nucleotide-sugar transport	1	0.199536	0.199536
GO:0008643	carbohydrate transport	1	0.598609	0.487135
Cluster 123: amino acid transport
observed gene count: 2
expected gene count: 0.7981450811527
uncorrected p-value: 0.18006772137428
GO ID	term	observed gene count	expected gene count	uncorrected p-value
GO:0006865	amino acid transport	2	0.598609	0.103536
Cluster 124: tissue homeostasis
observed gene count: 2
expected gene count: 0.7981450811527
uncorrected p-value: 0.18006772137428
GO ID	term	observed gene count	expected gene count	uncorrected p-value
GO:0001894	tissue homeostasis	1	0.399073	0.359268
GO:0010669	epithelial structure maintenance	1	0.399073	0.359268
Cluster 125: deoxyribonucleotide biosynthetic process
observed gene count: 1
expected gene count: 0.199536270288175
uncorrected p-value: 0.199536270288175
GO ID	term	observed gene count	expected gene count	uncorrected p-value
GO:0009263	deoxyribonucleotide biosynthetic process	1	0.199536	0.199536
Cluster 126: regulation of calcium ion transport
observed gene count: 1
expected gene count: 0.199536270288175
uncorrected p-value: 0.199536270288175
GO ID	term	observed gene count	expected gene count	uncorrected p-value
GO:0051924	regulation of calcium ion transport	1	0.199536	0.199536
Cluster 127: response to fungus
observed gene count: 23
expected gene count: 19.5545544882411
uncorrected p-value: 0.224216604366648
GO ID	term	observed gene count	expected gene count	uncorrected p-value
GO:0019732	antifungal humoral response	4	1.79583	0.0849691
GO:0008063	Toll signaling pathway	11	7.18331	0.0874789
GO:0009620	response to fungus	4	2.1949	0.16004
GO:0050832	defense response to fungus	10	8.97913	0.408924
GO:0045087	innate immune response	6	7.78191	0.818481
Cluster 128: rRNA processing
observed gene count: 14
expected gene count: 11.373567406426
uncorrected p-value: 0.234964302731584
GO ID	term	observed gene count	expected gene count	uncorrected p-value
GO:0006364	rRNA processing	8	5.98609	0.236985
GO:0016072	rRNA metabolic process	1	0.399073	0.359268
GO:0042254	ribosome biogenesis	6	5.58702	0.497059
Cluster 129: synaptogenesis
observed gene count: 9
expected gene count: 6.98376946008612
uncorrected p-value: 0.252513908405666
GO ID	term	observed gene count	expected gene count	uncorrected p-value
GO:0007416	synaptogenesis	6	4.98841	0.381004
GO:0050808	synapse organization	3	2.39444	0.440034
Cluster 130: protein processing
observed gene count: 5
expected gene count: 3.59165286518715
uncorrected p-value: 0.281824440211081
GO ID	term	observed gene count	expected gene count	uncorrected p-value
GO:0016485	protein processing	5	3.59165	0.281824
Cluster 131: regulation of organ growth
observed gene count: 8
expected gene count: 6.3851606492216
uncorrected p-value: 0.299270066758043
GO ID	term	observed gene count	expected gene count	uncorrected p-value
GO:0046620	regulation of organ growth	6	3.19258	0.0808154
GO:0032868	response to insulin stimulus	1	0.199536	0.199536
GO:0008286	insulin receptor signaling pathway	6	4.19026	0.228884
Cluster 132: hindgut morphogenesis
observed gene count: 12
expected gene count: 10.1763497846969
uncorrected p-value: 0.311532615188992
GO ID	term	observed gene count	expected gene count	uncorrected p-value
GO:0007443	Malpighian tubule morphogenesis	9	6.38516	0.172612
GO:0048619	embryonic hindgut morphogenesis	2	0.997681	0.261757
GO:0007442	hindgut morphogenesis	4	3.79119	0.542972
GO:0048567	ectodermal gut morphogenesis	1	0.798145	0.58949
Cluster 133: response to ecdysone
observed gene count: 5
expected gene count: 3.79118913547532
uncorrected p-value: 0.324760393070219
GO ID	term	observed gene count	expected gene count	uncorrected p-value
GO:0035076	ecdysone receptor-mediated signaling pathway	3	1.59629	0.202018
GO:0035075	response to ecdysone	2	2.39444	0.723918
Cluster 134: ubiquinone metabolic process
observed gene count: 2
expected gene count: 1.19721762172905
uncorrected p-value: 0.343500147630793
GO ID	term	observed gene count	expected gene count	uncorrected p-value
GO:0006744	ubiquinone biosynthetic process	2	1.19722	0.3435
GO:0006743	ubiquinone metabolic process	1	0.399073	0.359268
Cluster 135: immune response
observed gene count: 21
expected gene count: 19.9536270288175
uncorrected p-value: 0.435853553086165
GO ID	term	observed gene count	expected gene count	uncorrected p-value
GO:0006955	immune response	12	9.97681	0.286213
GO:0019730	antimicrobial humoral response	10	8.18099	0.293129
GO:0006959	humoral immune response	3	4.19026	0.820151
Cluster 136: cytokinesis, contractile ring formation
observed gene count: 4
expected gene count: 3.39211659489897
uncorrected p-value: 0.449208361930961
GO ID	term	observed gene count	expected gene count	uncorrected p-value
GO:0000915	cytokinesis, contractile ring formation	4	2.99304	0.350073
Cluster 137: response to radiation
observed gene count: 5
expected gene count: 4.38979794633985
uncorrected p-value: 0.454947490538011
GO ID	term	observed gene count	expected gene count	uncorrected p-value
GO:0009314	response to radiation	4	0.997681	0.00665156
GO:0009416	response to light stimulus	1	3.39212	0.97731
Cluster 138: response to cocaine
observed gene count: 1
expected gene count: 0.598608810864525
uncorrected p-value: 0.487134534606292
GO ID	term	observed gene count	expected gene count	uncorrected p-value
GO:0042220	response to cocaine	1	0.598609	0.487135
Cluster 139: synapse organization
observed gene count: 15
expected gene count: 14.9652202716131
uncorrected p-value: 0.542212187955633
GO ID	term	observed gene count	expected gene count	uncorrected p-value
GO:0048741	skeletal muscle fiber development	1	0.199536	0.199536
GO:0007528	neuromuscular junction development	10	7.78191	0.238792
GO:0050808	synapse organization	3	2.39444	0.440034
GO:0060537	muscle tissue development	1	0.798145	0.58949
Cluster 140: maintenance of protein location in cell
observed gene count: 2
expected gene count: 1.79582643259357
uncorrected p-value: 0.56245051993216
GO ID	term	observed gene count	expected gene count	uncorrected p-value
GO:0032507	maintenance of protein location in cell	2	0.997681	0.261757
Cluster 141: learning
observed gene count: 21
expected gene count: 21.5499171911229
uncorrected p-value: 0.591303957900376
GO ID	term	observed gene count	expected gene count	uncorrected p-value
GO:0007611	learning or memory	11	7.78191	0.138643
GO:0008355	olfactory learning	13	10.775	0.270834
GO:0042048	olfactory behavior	8	8.58006	0.647782
GO:0007612	learning	2	2.59397	0.765233
Cluster 142: steroid metabolic process
observed gene count: 6
expected gene count: 6.18562437893342
uncorrected p-value: 0.604638359218553
GO ID	term	observed gene count	expected gene count	uncorrected p-value
GO:0042810	pheromone metabolic process	4	1.19722	0.0167977
GO:0008202	steroid metabolic process	1	0.598609	0.487135
GO:0008205	ecdysone metabolic process	1	0.598609	0.487135
GO:0006697	ecdysone biosynthetic process	2	1.79583	0.562451
GO:0006694	steroid biosynthetic process	1	0.997681	0.671423
Cluster 143: R8 cell differentiation
observed gene count: 5
expected gene count: 5.18794302749255
uncorrected p-value: 0.614567366649962
GO ID	term	observed gene count	expected gene count	uncorrected p-value
GO:0045464	R8 cell fate specification	3	1.99536	0.32078
GO:0045465	R8 cell differentiation	1	1.19722	0.737008
GO:0048665	neuron fate specification	1	1.39675	0.789505
Cluster 144: feeding behavior
observed gene count: 4
expected gene count: 4.19026167605167
uncorrected p-value: 0.627763217977291
GO ID	term	observed gene count	expected gene count	uncorrected p-value
GO:0030536	larval feeding behavior	4	2.99304	0.350073
GO:0007631	feeding behavior	1	0.798145	0.58949
Cluster 145: hemocyte migration
observed gene count: 4
expected gene count: 4.58933421662802
uncorrected p-value: 0.701759947552897
GO ID	term	observed gene count	expected gene count	uncorrected p-value
GO:0035162	embryonic hemopoiesis	1	0.997681	0.671423
GO:0035099	hemocyte migration	3	3.59165	0.727217
Cluster 146: regulation of autophagy
observed gene count: 5
expected gene count: 5.78655183835707
uncorrected p-value: 0.71420541300517
GO ID	term	observed gene count	expected gene count	uncorrected p-value
GO:0010506	regulation of autophagy	5	4.3898	0.454947
Cluster 147: cilium assembly
observed gene count: 9
expected gene count: 10.3758860549851
uncorrected p-value: 0.735976286456155
GO ID	term	observed gene count	expected gene count	uncorrected p-value
GO:0035058	sensory cilium assembly	4	2.99304	0.350073
GO:0030031	cell projection assembly	3	2.79351	0.550282
GO:0042384	cilium assembly	3	5.58702	0.938305
Cluster 148: innate immune response
observed gene count: 20
expected gene count: 22.3480622722756
uncorrected p-value: 0.746261632749997
GO ID	term	observed gene count	expected gene count	uncorrected p-value
GO:0002805	regulation of antimicrobial peptide biosynthetic process	4	1.99536	0.119988
GO:0006963	positive regulation of antibacterial peptide biosynthetic process	4	2.99304	0.350073
GO:0002784	regulation of antimicrobial peptide production	1	0.399073	0.359268
GO:0045087	innate immune response	6	7.78191	0.818481
GO:0042742	defense response to bacterium	7	11.3736	0.954417
Cluster 149: phototransduction
observed gene count: 12
expected gene count: 13.7680026498841
uncorrected p-value: 0.747970139543227
GO ID	term	observed gene count	expected gene count	uncorrected p-value
GO:0050908	detection of light stimulus involved in visual perception	2	1.39675	0.422024
GO:0008277	regulation of G-protein coupled receptor protein signaling pathway	2	1.59629	0.49536
GO:0016059	deactivation of rhodopsin mediated signaling	3	2.59397	0.496686
GO:0007602	phototransduction	6	7.58238	0.798006
GO:0016056	rhodopsin mediated signaling pathway	1	1.79583	0.865161
GO:0009416	response to light stimulus	1	3.39212	0.97731
Cluster 150: regulation of DNA binding
observed gene count: 4
expected gene count: 4.98840675720437
uncorrected p-value: 0.764493394363459
GO ID	term	observed gene count	expected gene count	uncorrected p-value
GO:0051101	regulation of DNA binding	2	0.598609	0.103536
GO:0043388	positive regulation of DNA binding	1	0.598609	0.487135
GO:0051090	regulation of transcription factor activity	1	3.79119	0.98547
Cluster 151: response to oxidative stress
observed gene count: 14
expected gene count: 16.5615104339185
uncorrected p-value: 0.798222230170352
GO ID	term	observed gene count	expected gene count	uncorrected p-value
GO:0042542	response to hydrogen peroxide	2	0.798145	0.180068
GO:0042744	hydrogen peroxide catabolic process	2	1.19722	0.3435
GO:0034614	cellular response to reactive oxygen species	1	0.798145	0.58949
GO:0006979	response to oxidative stress	11	12.5708	0.737389
Cluster 152: glycerol metabolic process
observed gene count: 1
expected gene count: 1.5962901623054
uncorrected p-value: 0.831526197438086
GO ID	term	observed gene count	expected gene count	uncorrected p-value
GO:0006071	glycerol metabolic process	1	1.59629	0.831526
Cluster 153: mitochondrial transport
observed gene count: 6
expected gene count: 7.981450811527
uncorrected p-value: 0.837278745652189
GO ID	term	observed gene count	expected gene count	uncorrected p-value
GO:0006839	mitochondrial transport	3	2.99304	0.600334
GO:0006626	protein targeting to mitochondrion	4	5.18794	0.791753
Cluster 154: neuroblast differentiation
observed gene count: 4
expected gene count: 5.5870155680689
uncorrected p-value: 0.83862406943782
GO ID	term	observed gene count	expected gene count	uncorrected p-value
GO:0014016	neuroblast differentiation	1	0.199536	0.199536
GO:0007400	neuroblast fate determination	3	5.38748	0.927624
Cluster 155: axonal fasciculation
observed gene count: 3
expected gene count: 4.38979794633985
uncorrected p-value: 0.844464095802447
GO ID	term	observed gene count	expected gene count	uncorrected p-value
GO:0007413	axonal fasciculation	3	3.19258	0.646563
Cluster 156: negative regulation of catalytic activity
observed gene count: 2
expected gene count: 3.1925803246108
uncorrected p-value: 0.858420925077506
GO ID	term	observed gene count	expected gene count	uncorrected p-value
GO:0006469	negative regulation of protein kinase activity	1	0.199536	0.199536
GO:0043086	negative regulation of catalytic activity	1	0.399073	0.359268
Cluster 157: immune response
observed gene count: 22
expected gene count: 26.7378602186154
uncorrected p-value: 0.873882899485192
GO ID	term	observed gene count	expected gene count	uncorrected p-value
GO:0006955	immune response	12	9.97681	0.286213
GO:0045087	innate immune response	6	7.78191	0.818481
GO:0006952	defense response	16	20.1532	0.879649
Cluster 158: epithelial cell migration, open tracheal system
observed gene count: 4
expected gene count: 6.18562437893342
uncorrected p-value: 0.892104711391301
GO ID	term	observed gene count	expected gene count	uncorrected p-value
GO:0007427	epithelial cell migration, open tracheal system	4	6.18562	0.892105
Cluster 159: mating behavior
observed gene count: 10
expected gene count: 13.5684663795959
uncorrected p-value: 0.895763951131163
GO ID	term	observed gene count	expected gene count	uncorrected p-value
GO:0045924	regulation of female receptivity	3	0.997681	0.057534
GO:0060180	female mating behavior	1	1.19722	0.737008
GO:0007619	courtship behavior	4	5.18794	0.791753
GO:0008049	male courtship behavior	5	6.98377	0.85531
GO:0007617	mating behavior	1	1.79583	0.865161
Cluster 160: cuticle development
observed gene count: 12
expected gene count: 16.5615104339185
uncorrected p-value: 0.923052596242416
GO ID	term	observed gene count	expected gene count	uncorrected p-value
GO:0007591	molting cycle, chitin-based cuticle	4	2.59397	0.251191
GO:0008362	chitin-based embryonic cuticle biosynthetic process	4	3.39212	0.449208
GO:0042335	cuticle development	2	1.79583	0.562451
GO:0040003	chitin-based cuticle development	3	9.3782	0.997737
Cluster 161: fatty acid biosynthetic process
observed gene count: 2
expected gene count: 3.9907254057635
uncorrected p-value: 0.93031485875722
GO ID	term	observed gene count	expected gene count	uncorrected p-value
GO:0006633	fatty acid biosynthetic process	2	3.99073	0.930315
Cluster 162: nucleoside metabolic process
observed gene count: 1
expected gene count: 2.3944352434581
uncorrected p-value: 0.930876410143588
GO ID	term	observed gene count	expected gene count	uncorrected p-value
GO:0009116	nucleoside metabolic process	1	2.39444	0.930876
Cluster 163: gonad development
observed gene count: 6
expected gene count: 9.57774097383239
uncorrected p-value: 0.937229164159507
GO ID	term	observed gene count	expected gene count	uncorrected p-value
GO:0008406	gonad development	5	6.5847	0.816458
GO:0007548	sex differentiation	1	3.19258	0.971647
Cluster 164: regulation of circadian rhythm
observed gene count: 3
expected gene count: 5.78655183835707
uncorrected p-value: 0.947509175731316
GO ID	term	observed gene count	expected gene count	uncorrected p-value
GO:0045187	regulation of circadian sleep/wake cycle, sleep	2	2.59397	0.765233
GO:0042752	regulation of circadian rhythm	1	1.99536	0.892082
Cluster 165: visual perception
observed gene count: 1
expected gene count: 2.79350778403445
uncorrected p-value: 0.955727898530919
GO ID	term	observed gene count	expected gene count	uncorrected p-value
GO:0007601	visual perception	1	2.79351	0.955728
Cluster 166: response to bacterium
observed gene count: 16
expected gene count: 22.9466710831401
uncorrected p-value: 0.964223664702055
GO ID	term	observed gene count	expected gene count	uncorrected p-value
GO:0050829	defense response to Gram-negative bacterium	8	10.1763	0.825368
GO:0042742	defense response to bacterium	7	11.3736	0.954417
GO:0009617	response to bacterium	2	4.58933	0.959826
Cluster 167: metal ion transport
observed gene count: 3
expected gene count: 6.98376946008612
uncorrected p-value: 0.980769225662485
GO ID	term	observed gene count	expected gene count	uncorrected p-value
GO:0030001	metal ion transport	1	1.99536	0.892082
GO:0006816	calcium ion transport	2	4.98841	0.97237
Cluster 168: cation transport
observed gene count: 10
expected gene count: 17.9582643259357
uncorrected p-value: 0.991297433116504
GO ID	term	observed gene count	expected gene count	uncorrected p-value
GO:0006812	cation transport	5	5.58702	0.68317
GO:0030001	metal ion transport	1	1.99536	0.892082
GO:0006814	sodium ion transport	4	10.3759	0.995917
Cluster 169: proton transport
observed gene count: 5
expected gene count: 11.7726399470023
uncorrected p-value: 0.995336341416937
GO ID	term	observed gene count	expected gene count	uncorrected p-value
GO:0006163	purine nucleotide metabolic process	2	0.399073	0.0398041
GO:0009152	purine ribonucleotide biosynthetic process	1	0.199536	0.199536
GO:0009165	nucleotide biosynthetic process	1	0.598609	0.487135
GO:0015986	ATP synthesis coupled proton transport	1	3.59165	0.981843
GO:0015992	proton transport	2	6.18562	0.991248
Cluster 170: autophagic cell death
observed gene count: 16
expected gene count: 26.9373964889036
uncorrected p-value: 0.995534395471291
GO ID	term	observed gene count	expected gene count	uncorrected p-value
GO:0035070	salivary gland histolysis	1	1.59629	0.831526
GO:0048102	autophagic cell death	8	11.3736	0.905627
GO:0007435	salivary gland morphogenesis	6	9.97681	0.951464
GO:0035071	salivary gland cell autophagic cell death	8	13.1694	0.966632
GO:0007431	salivary gland development	2	4.98841	0.97237
Cluster 171: chromatin assembly
observed gene count: 14
expected gene count: 27.33646902948
uncorrected p-value: 0.999304327571987
GO ID	term	observed gene count	expected gene count	uncorrected p-value
GO:0065004	protein-DNA complex assembly	3	0.598609	0.00793815
GO:0034728	nucleosome organization	1	0.199536	0.199536
GO:0031497	chromatin assembly	1	0.399073	0.359268
GO:0006334	nucleosome assembly	8	25.7402	0.999998
GO:0006333	chromatin assembly or disassembly	6	23.9444	0.999999
Cluster 172: proteolysis
observed gene count: 92
expected gene count: 123.912023848957
uncorrected p-value: 0.999701261945068
GO ID	term	observed gene count	expected gene count	uncorrected p-value
GO:0006511	ubiquitin-dependent protein catabolic process	42	15.7634	5.39452e-11
GO:0051603	proteolysis involved in cellular protein catabolic process	7	1.59629	8.27286e-05
GO:0030163	protein catabolic process	9	4.19026	0.0141383
GO:0006508	proteolysis	57	108.947	1
Cluster 173: chitin catabolic process
observed gene count: 3
expected gene count: 21.7494534614111
uncorrected p-value: 0.999999989418495
GO ID	term	observed gene count	expected gene count	uncorrected p-value
GO:0006032	chitin catabolic process	3	3.19258	0.646563
Cluster 174: translation
observed gene count: 22
expected gene count: 118.724080821464
uncorrected p-value: 1
GO ID	term	observed gene count	expected gene count	uncorrected p-value
GO:0006399	tRNA metabolic process	1	0.199536	0.199536
GO:0006412	translation	21	118.525	1

## Sheet: Embryo2-4h
sample name: Embryo2-4h
number of associated genes in the sample: 2069
Cluster 1: RNA splicing
observed gene count: 139
expected gene count: 34.266313348791
uncorrected p-value: 7.9087459884548e-56
GO ID	term	observed gene count	expected gene count	uncorrected p-value
GO:0000398	nuclear mRNA splicing, via spliceosome	126	29.1949	7.49453e-55
GO:0006397	mRNA processing	10	2.74131	0.00011366
GO:0008380	RNA splicing	8	1.91891	0.000170649
GO:0000375	RNA splicing, via transesterification reactions	3	0.411196	0.00257181
GO:0006396	RNA processing	6	3.01544	0.0702321
Cluster 2: transcription initiation
observed gene count: 71
expected gene count: 18.366743954952
uncorrected p-value: 3.07555138954308e-27
GO ID	term	observed gene count	expected gene count	uncorrected p-value
GO:0006367	transcription initiation from RNA polymerase II promoter	46	8.77218	3.65951e-26
GO:0006366	transcription from RNA polymerase II promoter	30	6.57913	6.2524e-15
GO:0006351	transcription, DNA-dependent	15	6.16794	0.000644654
GO:0006352	transcription initiation	2	1.23359	0.355363
GO:0006461	protein complex assembly	1	0.411196	0.35743
Cluster 3: regulation of RNA splicing
observed gene count: 41
expected gene count: 8.08684995031467
uncorrected p-value: 1.49165613562043e-22
GO ID	term	observed gene count	expected gene count	uncorrected p-value
GO:0000381	regulation of alternative nuclear mRNA splicing, via spliceosome	35	6.99033	3.64829e-19
GO:0048024	regulation of nuclear mRNA splicing, via spliceosome	6	1.09652	0.000143844
GO:0043484	regulation of RNA splicing	2	0.411196	0.0511935
Cluster 4: chromatin silencing
observed gene count: 97
expected gene count: 36.3222921497185
uncorrected p-value: 3.19846025765338e-21
GO ID	term	observed gene count	expected gene count	uncorrected p-value
GO:0006342	chromatin silencing	21	5.07141	9.63649e-10
GO:0045892	negative regulation of transcription, DNA-dependent	33	11.2394	2.45694e-09
GO:0000122	negative regulation of transcription from RNA polymerase II promoter	44	19.1891	4.88103e-08
GO:0010629	negative regulation of gene expression	24	7.94978	1.9549e-07
GO:0045814	negative regulation of gene expression, epigenetic	1	0.137065	0.137065
Cluster 5: cell cycle
observed gene count: 116
expected gene count: 48.3840344484929
uncorrected p-value: 1.07978477246659e-20
GO ID	term	observed gene count	expected gene count	uncorrected p-value
GO:0007052	mitotic spindle organization	64	25.7683	8.91592e-13
GO:0007049	cell cycle	22	5.07141	1.08891e-10
GO:0007017	microtubule-based process	14	6.44207	0.00322431
GO:0000278	mitotic cell cycle	10	4.38609	0.00838048
GO:0007051	spindle organization	4	1.50772	0.0523116
GO:0007010	cytoskeleton organization	10	5.89381	0.0617466
GO:0000226	microtubule cytoskeleton organization	5	4.24902	0.423076
Cluster 6: mitosis
observed gene count: 77
expected gene count: 26.8647896654521
uncorrected p-value: 3.41790040044968e-19
GO ID	term	observed gene count	expected gene count	uncorrected p-value
GO:0007067	mitosis	41	13.1583	2.93791e-12
GO:0007059	chromosome segregation	15	4.52315	9.73194e-06
GO:0007076	mitotic chromosome condensation	11	3.1525	8.61066e-05
GO:0000070	mitotic sister chromatid segregation	9	3.1525	0.00223383
GO:0000278	mitotic cell cycle	10	4.38609	0.00838048
GO:0030261	chromosome condensation	6	2.74131	0.0462419
GO:0000087	M phase of mitotic cell cycle	2	0.548261	0.093156
GO:0000819	sister chromatid segregation	2	0.685326	0.141443
GO:0000280	nuclear division	1	0.959457	0.643754
Cluster 7: regulation of transcription, DNA-dependent
observed gene count: 128
expected gene count: 62.2276250414044
uncorrected p-value: 1.66446544411879e-16
GO ID	term	observed gene count	expected gene count	uncorrected p-value
GO:0006357	regulation of transcription from RNA polymerase II promoter	54	17.2702	8.83372e-16
GO:0006355	regulation of transcription, DNA-dependent	87	48.5211	2.16911e-08
Cluster 8: spindle checkpoint
observed gene count: 64
expected gene count: 22.2045710500166
uncorrected p-value: 2.54664675825345e-16
GO ID	term	observed gene count	expected gene count	uncorrected p-value
GO:0051726	regulation of cell cycle	33	11.1023	1.68868e-09
GO:0007346	regulation of mitotic cell cycle	11	4.24902	0.00188791
GO:0045839	negative regulation of mitosis	3	0.411196	0.00257181
GO:0007088	regulation of mitosis	9	3.28957	0.00314451
GO:0007093	mitotic cell cycle checkpoint	5	1.23359	0.00375143
GO:0007094	mitotic cell cycle spindle assembly checkpoint	5	1.50772	0.0108456
GO:0030071	regulation of mitotic metaphase/anaphase transition	3	1.09652	0.0845351
GO:0045841	negative regulation of mitotic metaphase/anaphase transition	1	0.137065	0.137065
GO:0031577	spindle checkpoint	1	0.274131	0.255351
GO:0000075	cell cycle checkpoint	1	0.822392	0.587143
Cluster 9: positive regulation of gene expression
observed gene count: 77
expected gene count: 30.5655515071216
uncorrected p-value: 1.77230101215652e-15
GO ID	term	observed gene count	expected gene count	uncorrected p-value
GO:0045893	positive regulation of transcription, DNA-dependent	32	10.417	1.10077e-09
GO:0045944	positive regulation of transcription from RNA polymerase II promoter	50	22.7528	2.89186e-08
GO:0010628	positive regulation of gene expression	5	2.33011	0.0721406
Cluster 10: eye development
observed gene count: 83
expected gene count: 37.2817489234846
uncorrected p-value: 3.83718742718343e-13
GO ID	term	observed gene count	expected gene count	uncorrected p-value
GO:0048749	compound eye development	35	15.7625	2.55699e-06
GO:0001745	compound eye morphogenesis	24	11.3764	0.000222787
GO:0001751	compound eye photoreceptor cell differentiation	9	3.42663	0.00432382
GO:0007423	sensory organ development	14	8.22392	0.0297409
GO:0048663	neuron fate commitment	3	0.822392	0.0372617
GO:0001654	eye development	3	1.64478	0.220546
GO:0046552	photoreceptor cell fate commitment	1	0.274131	0.255351
GO:0007465	R7 cell fate commitment	3	1.78185	0.259471
GO:0048592	eye morphogenesis	2	1.09652	0.301793
GO:0046530	photoreceptor cell differentiation	1	0.548261	0.445522
GO:0001754	eye photoreceptor cell differentiation	1	0.685326	0.521542
GO:0001752	compound eye photoreceptor fate commitment	1	1.23359	0.734761
GO:0045466	R7 cell differentiation	1	1.23359	0.734761
Cluster 11: nuclear export
observed gene count: 26
expected gene count: 6.03087114938721
uncorrected p-value: 2.63940044523384e-12
GO ID	term	observed gene count	expected gene count	uncorrected p-value
GO:0006406	mRNA export from nucleus	15	2.60424	2.43275e-10
GO:0006913	nucleocytoplasmic transport	6	1.09652	0.000143844
GO:0051168	nuclear export	3	0.822392	0.0372617
GO:0051236	establishment of RNA localization	1	0.137065	0.137065
GO:0051028	mRNA transport	2	0.959457	0.247479
Cluster 12: stem cell division
observed gene count: 30
expected gene count: 8.22391520370984
uncorrected p-value: 1.88538062746246e-11
GO ID	term	observed gene count	expected gene count	uncorrected p-value
GO:0055059	asymmetric neuroblast division	15	4.11196	2.18386e-06
GO:0007405	neuroblast proliferation	10	2.74131	0.00011366
GO:0048103	somatic stem cell division	5	1.23359	0.00375143
GO:0040001	establishment of mitotic spindle localization	5	1.23359	0.00375143
GO:0017145	stem cell division	3	0.685326	0.0207262
GO:0055057	neuroblast division	1	0.274131	0.255351
Cluster 13: histone exchange
observed gene count: 19
expected gene count: 3.70076184166943
uncorrected p-value: 2.73473633579638e-11
GO ID	term	observed gene count	expected gene count	uncorrected p-value
GO:0016573	histone acetylation	13	2.33011	8.08382e-09
GO:0043044	ATP-dependent chromatin remodeling	4	0.548261	0.000352064
GO:0043486	histone exchange	3	0.411196	0.00257181
GO:0034728	nucleosome organization	1	0.137065	0.137065
GO:0016570	histone modification	1	0.548261	0.445522
Cluster 14: segmentation
observed gene count: 69
expected gene count: 31.1138125207022
uncorrected p-value: 4.52052979965107e-11
GO ID	term	observed gene count	expected gene count	uncorrected p-value
GO:0007350	blastoderm segmentation	13	3.01544	8.61432e-07
GO:0009880	embryonic pattern specification	10	3.01544	0.000306336
GO:0007309	oocyte axis specification	8	2.05598	0.000321744
GO:0007314	oocyte anterior/posterior axis specification	10	3.28957	0.000716034
GO:0008595	determination of anterior/posterior axis, embryo	12	5.07141	0.00285412
GO:0008298	intracellular mRNA localization	8	3.1525	0.0088936
GO:0045451	pole plasm oskar mRNA localization	9	4.24902	0.0199311
GO:0035282	segmentation	5	1.91891	0.0330356
GO:0019094	pole plasm mRNA localization	3	0.959457	0.0586689
GO:0007317	regulation of pole plasm oskar mRNA localization	6	3.42663	0.117277
GO:0007315	pole plasm assembly	4	2.19304	0.166666
GO:0009948	anterior/posterior axis specification	2	0.959457	0.247479
GO:0007389	pattern specification process	4	2.87837	0.322995
GO:0008358	maternal determination of anterior/posterior axis, embryo	1	0.548261	0.445522
GO:0009952	anterior/posterior pattern formation	3	2.46717	0.456594
GO:0007310	oocyte dorsal/ventral axis specification	3	2.87837	0.564289
GO:0048599	oocyte development	1	0.959457	0.643754
GO:0009798	axis specification	1	1.09652	0.692606
GO:0009994	oocyte differentiation	1	1.09652	0.692606
GO:0007281	germ cell development	3	4.11196	0.799331
Cluster 15: protein stabilization
observed gene count: 20
expected gene count: 4.38608810864525
uncorrected p-value: 2.17015130895798e-10
GO ID	term	observed gene count	expected gene count	uncorrected p-value
GO:0050821	protein stabilization	12	2.60424	8.42412e-07
GO:0031647	regulation of protein stability	8	1.64478	3.63633e-05
GO:0000338	protein deneddylation	2	0.411196	0.0511935
Cluster 16: gene silencing
observed gene count: 28
expected gene count: 8.360980457105
uncorrected p-value: 1.10560040976749e-09
GO ID	term	observed gene count	expected gene count	uncorrected p-value
GO:0035195	gene silencing by miRNA	11	3.01544	5.12632e-05
GO:0016458	gene silencing	8	2.19304	0.000566327
GO:0031047	gene silencing by RNA	3	0.411196	0.00257181
GO:0016246	RNA interference	8	3.42663	0.0152713
GO:0035194	posttranscriptional gene silencing by RNA	2	0.274131	0.018779
Cluster 17: stem cell maintenance
observed gene count: 34
expected gene count: 11.5134812851938
uncorrected p-value: 1.17832957113319e-09
GO ID	term	observed gene count	expected gene count	uncorrected p-value
GO:0035019	somatic stem cell maintenance	10	1.91891	1.3546e-06
GO:0008356	asymmetric cell division	12	3.28957	2.32001e-05
GO:0030718	germ-line stem cell maintenance	13	5.07141	0.000832867
GO:0042078	germ-line stem cell division	9	2.87837	0.0010388
GO:0048863	stem cell differentiation	2	0.685326	0.141443
GO:0019827	stem cell maintenance	2	0.959457	0.247479
GO:0045596	negative regulation of cell differentiation	1	0.548261	0.445522
Cluster 18: cytokinesis
observed gene count: 31
expected gene count: 10.005763497847
uncorrected p-value: 1.55246771056343e-09
GO ID	term	observed gene count	expected gene count	uncorrected p-value
GO:0000910	cytokinesis	27	8.90924	3.08959e-08
GO:0000915	cytokinesis, contractile ring formation	10	2.05598	3.56187e-06
GO:0031032	actomyosin structure organization	1	0.274131	0.255351
Cluster 19: dorsal closure
observed gene count: 54
expected gene count: 24.1234845975489
uncorrected p-value: 3.96773713723856e-09
GO ID	term	observed gene count	expected gene count	uncorrected p-value
GO:0007391	dorsal closure	28	12.1988	1.25486e-05
GO:0002009	morphogenesis of an epithelium	11	3.42663	0.000218124
GO:0001700	embryonic development via the syncytial blastoderm	16	6.85326	0.000717611
GO:0016331	morphogenesis of embryonic epithelium	4	1.09652	0.0155584
GO:0060429	epithelium development	2	0.411196	0.0511935
GO:0048598	embryonic morphogenesis	1	1.37065	0.771138
GO:0009792	embryonic development ending in birth or egg hatching	1	1.37065	0.771138
Cluster 20: histone modification
observed gene count: 27
expected gene count: 8.360980457105
uncorrected p-value: 5.87709357541467e-09
GO ID	term	observed gene count	expected gene count	uncorrected p-value
GO:0006325	chromatin organization	17	3.97489	2.00896e-08
GO:0051276	chromosome organization	11	3.97489	0.00100174
GO:0016570	histone modification	1	0.548261	0.445522
Cluster 21: zonula adherens assembly
observed gene count: 26
expected gene count: 8.08684995031467
uncorrected p-value: 1.2572587036461e-08
GO ID	term	observed gene count	expected gene count	uncorrected p-value
GO:0045196	establishment or maintenance of neuroblast polarity	8	1.09652	1.23123e-07
GO:0016332	establishment or maintenance of polarity of embryonic epithelium	8	1.23359	9.73553e-07
GO:0007043	cell-cell junction assembly	6	0.822392	6.58938e-06
GO:0008105	asymmetric protein localization	10	2.19304	8.3266e-06
GO:0001738	morphogenesis of a polarized epithelium	10	2.19304	8.3266e-06
GO:0045176	apical protein localization	7	1.23359	2.51471e-05
GO:0045186	zonula adherens assembly	7	1.37065	7.38424e-05
GO:0045175	basal protein localization	6	1.09652	0.000143844
GO:0045197	establishment or maintenance of epithelial cell apical/basal polarity	7	2.33011	0.00497025
GO:0035088	establishment or maintenance of apical/basal cell polarity	4	1.64478	0.0702062
GO:0030010	establishment of cell polarity	2	0.685326	0.141443
GO:0045216	cell-cell junction organization	1	0.411196	0.35743
Cluster 22: DNA repair
observed gene count: 47
expected gene count: 20.4227227558794
uncorrected p-value: 1.51504362018635e-08
GO ID	term	observed gene count	expected gene count	uncorrected p-value
GO:0006974	response to DNA damage stimulus	32	13.0212	5.69343e-07
GO:0006281	DNA repair	14	7.81272	0.0195042
GO:0006259	DNA metabolic process	3	0.685326	0.0207262
Cluster 23: cell motion
observed gene count: 106
expected gene count: 62.5017555481948
uncorrected p-value: 1.61028966403973e-08
GO ID	term	observed gene count	expected gene count	uncorrected p-value
GO:0007517	muscle organ development	22	8.63511	1.69469e-05
GO:0007411	axon guidance	39	21.2451	9.42165e-05
GO:0048813	dendrite morphogenesis	30	18.0926	0.00320666
GO:0048812	neuron projection morphogenesis	25	14.3919	0.00356379
GO:0007409	axonogenesis	14	6.85326	0.00595609
GO:0000902	cell morphogenesis	11	6.44207	0.0495348
GO:0031175	neuron projection development	2	0.411196	0.0511935
GO:0048666	neuron development	7	5.61968	0.32782
GO:0006928	cell motion	1	0.548261	0.445522
GO:0030182	neuron differentiation	1	1.23359	0.734761
Cluster 24: protein targeting
observed gene count: 63
expected gene count: 31.799138787678
uncorrected p-value: 4.07106450952571e-08
GO ID	term	observed gene count	expected gene count	uncorrected p-value
GO:0006606	protein import into nucleus	13	3.28957	3.3044e-06
GO:0006913	nucleocytoplasmic transport	6	1.09652	0.000143844
GO:0008104	protein localization	16	6.16794	0.000184602
GO:0046907	intracellular transport	5	1.91891	0.0330356
GO:0045184	establishment of protein localization	3	0.822392	0.0372617
GO:0006886	intracellular protein transport	16	10.2799	0.0453932
GO:0006605	protein targeting	2	0.822392	0.193533
GO:0034613	cellular protein localization	1	0.274131	0.255351
GO:0000059	protein import into nucleus, docking	1	0.411196	0.35743
GO:0015031	protein transport	9	9.18337	0.579951
Cluster 25: regulation of protein localization
observed gene count: 18
expected gene count: 4.79728386883074
uncorrected p-value: 1.19779305861748e-07
GO ID	term	observed gene count	expected gene count	uncorrected p-value
GO:0032880	regulation of protein localization	5	0.959457	0.000794566
GO:0051533	positive regulation of NFAT protein import into nucleus	7	2.19304	0.00331144
GO:0042306	regulation of protein import into nucleus	3	0.822392	0.0372617
GO:0046822	regulation of nucleocytoplasmic transport	1	0.137065	0.137065
GO:0033157	regulation of intracellular protein transport	1	0.137065	0.137065
GO:0042993	positive regulation of transcription factor import into nucleus	1	0.274131	0.255351
Cluster 26: phosphorylation
observed gene count: 66
expected gene count: 35.4999006293475
uncorrected p-value: 2.6443749239611e-07
GO ID	term	observed gene count	expected gene count	uncorrected p-value
GO:0006468	protein amino acid phosphorylation	64	31.9362	1.97954e-08
GO:0016310	phosphorylation	3	3.5637	0.711678
Cluster 27: mRNA cleavage
observed gene count: 16
expected gene count: 4.11195760185492
uncorrected p-value: 3.1674357340128e-07
GO ID	term	observed gene count	expected gene count	uncorrected p-value
GO:0006379	mRNA cleavage	8	1.91891	0.000170649
GO:0006398	histone mRNA 3'-end processing	6	1.23359	0.000381239
GO:0006378	mRNA polyadenylation	8	2.46717	0.00149264
GO:0043631	RNA polyadenylation	1	0.137065	0.137065
GO:0008334	histone mRNA metabolic process	1	0.274131	0.255351
Cluster 28: metamorphosis
observed gene count: 82
expected gene count: 47.5616429281219
uncorrected p-value: 3.29425556700328e-07
GO ID	term	observed gene count	expected gene count	uncorrected p-value
GO:0007476	imaginal disc-derived wing morphogenesis	47	27.0019	7.97247e-05
GO:0035220	wing disc development	19	9.73163	0.00262908
GO:0035107	appendage morphogenesis	1	0.137065	0.137065
GO:0035120	post-embryonic appendage morphogenesis	1	0.137065	0.137065
GO:0007444	imaginal disc development	7	4.52315	0.157017
GO:0002165	instar larval or pupal development	3	1.50772	0.182961
GO:0007472	wing disc morphogenesis	4	2.33011	0.19575
GO:0007552	metamorphosis	6	4.93435	0.371273
GO:0007560	imaginal disc morphogenesis	1	0.822392	0.587143
Cluster 29: endocytosis
observed gene count: 77
expected gene count: 44.272076846638
uncorrected p-value: 5.1779116502168e-07
GO ID	term	observed gene count	expected gene count	uncorrected p-value
GO:0006911	phagocytosis, engulfment	53	24.5347	2.14018e-08
GO:0016044	membrane organization	6	1.78185	0.00476262
GO:0006897	endocytosis	9	5.75674	0.112392
GO:0016192	vesicle-mediated transport	11	11.7876	0.645144
GO:0006909	phagocytosis	2	2.46717	0.728478
Cluster 30: gastrulation
observed gene count: 16
expected gene count: 4.24902285525008
uncorrected p-value: 5.71310355600558e-07
GO ID	term	observed gene count	expected gene count	uncorrected p-value
GO:0007369	gastrulation	12	3.42663	3.90588e-05
GO:0010004	gastrulation involving germ band extension	7	1.50772	0.00017894
Cluster 31: spliceosome assembly
observed gene count: 11
expected gene count: 2.19304405432262
uncorrected p-value: 7.03027759661104e-07
GO ID	term	observed gene count	expected gene count	uncorrected p-value
GO:0006376	mRNA splice site selection	5	0.959457	0.000794566
GO:0000245	spliceosome assembly	4	0.959457	0.00871877
GO:0022618	ribonucleoprotein complex assembly	2	0.274131	0.018779
Cluster 32: cell motion
observed gene count: 44
expected gene count: 21.5192447830407
uncorrected p-value: 1.74024586364001e-06
GO ID	term	observed gene count	expected gene count	uncorrected p-value
GO:0007298	border follicle cell migration	29	12.7471	1.07151e-05
GO:0030707	ovarian follicle cell development	20	7.40152	1.49932e-05
GO:0006928	cell motion	1	0.548261	0.445522
GO:0007297	ovarian follicle cell migration	2	1.50772	0.45724
GO:0016477	cell migration	2	3.1525	0.843445
Cluster 33: basal protein localization
observed gene count: 11
expected gene count: 2.33010930771779
uncorrected p-value: 1.74400826694242e-06
GO ID	term	observed gene count	expected gene count	uncorrected p-value
GO:0045167	asymmetric protein localization involved in cell fate determination	9	1.91891	1.75138e-05
GO:0045175	basal protein localization	6	1.09652	0.000143844
GO:0051294	establishment of spindle orientation	3	0.685326	0.0207262
Cluster 34: axis specification
observed gene count: 23
expected gene count: 8.22391520370984
uncorrected p-value: 1.74973271259548e-06
GO ID	term	observed gene count	expected gene count	uncorrected p-value
GO:0009950	dorsal/ventral axis specification	15	4.11196	2.18386e-06
GO:0009953	dorsal/ventral pattern formation	8	3.70076	0.024433
GO:0009798	axis specification	1	1.09652	0.692606
Cluster 35: meiosis
observed gene count: 32
expected gene count: 13.7065253395164
uncorrected p-value: 2.04876714276175e-06
GO ID	term	observed gene count	expected gene count	uncorrected p-value
GO:0007059	chromosome segregation	15	4.52315	9.73194e-06
GO:0016321	female meiosis chromosome segregation	10	4.24902	0.00655072
GO:0007143	female meiosis	8	3.42663	0.0152713
GO:0045132	meiotic chromosome segregation	1	0.548261	0.445522
GO:0007126	meiosis	2	2.87837	0.804055
Cluster 36: spindle assembly
observed gene count: 18
expected gene count: 5.61967538920172
uncorrected p-value: 2.34794056839195e-06
GO ID	term	observed gene count	expected gene count	uncorrected p-value
GO:0007056	spindle assembly involved in female meiosis	4	0.685326	0.00156762
GO:0007058	spindle assembly involved in female meiosis II	3	0.548261	0.00923104
GO:0000212	meiotic spindle organization	4	1.09652	0.0155584
GO:0051225	spindle assembly	7	3.28957	0.0373728
GO:0007147	female meiosis II	2	0.411196	0.0511935
Cluster 37: trunk segmentation
observed gene count: 9
expected gene count: 1.78184829413713
uncorrected p-value: 7.12572519404807e-06
GO ID	term	observed gene count	expected gene count	uncorrected p-value
GO:0035290	trunk segmentation	7	1.37065	7.38424e-05
GO:0035289	posterior head segmentation	6	1.37065	0.000842334
Cluster 38: actin filament organization
observed gene count: 32
expected gene count: 14.8030473666777
uncorrected p-value: 1.25663562543023e-05
GO ID	term	observed gene count	expected gene count	uncorrected p-value
GO:0007015	actin filament organization	20	9.4575	0.000698393
GO:0030036	actin cytoskeleton organization	16	6.85326	0.000717611
GO:0031032	actomyosin structure organization	1	0.274131	0.255351
Cluster 39: centrosome cycle
observed gene count: 33
expected gene count: 15.4883736336535
uncorrected p-value: 1.29591934659559e-05
GO ID	term	observed gene count	expected gene count	uncorrected p-value
GO:0051297	centrosome organization	17	6.99033	0.00028711
GO:0007099	centriole replication	7	2.74131	0.0136641
GO:0051298	centrosome duplication	16	9.18337	0.0170473
GO:0031023	microtubule organizing center organization	2	0.411196	0.0511935
GO:0007098	centrosome cycle	3	1.23359	0.114301
Cluster 40: sex determination
observed gene count: 11
expected gene count: 2.74130506790328
uncorrected p-value: 1.59001142058571e-05
GO ID	term	observed gene count	expected gene count	uncorrected p-value
GO:0007540	sex determination, establishment of X:A ratio	5	0.685326	4.81753e-05
GO:0007530	sex determination	9	2.46717	0.000253056
GO:0007539	primary sex determination, soma	3	0.411196	0.00257181
GO:0018993	somatic sex determination	1	0.548261	0.445522
Cluster 41: torso signaling pathway
observed gene count: 17
expected gene count: 6.16793640278238
uncorrected p-value: 4.82801676375771e-05
GO ID	term	observed gene count	expected gene count	uncorrected p-value
GO:0007354	zygotic determination of anterior/posterior axis, embryo	7	1.09652	6.34545e-06
GO:0008293	torso signaling pathway	13	4.66022	0.000323028
GO:0007362	terminal region determination	10	3.70076	0.00208705
Cluster 42: zonula adherens assembly
observed gene count: 13
expected gene count: 4.11195760185492
uncorrected p-value: 7.10193357665149e-05
GO ID	term	observed gene count	expected gene count	uncorrected p-value
GO:0045186	zonula adherens assembly	7	1.37065	7.38424e-05
GO:0016334	establishment or maintenance of polarity of follicular epithelium	5	1.50772	0.0108456
GO:0016333	morphogenesis of follicular epithelium	4	1.37065	0.037233
GO:0008069	dorsal/ventral axis specification, ovarian follicular epithelium	3	0.959457	0.0586689
Cluster 43: wing disc pattern formation
observed gene count: 23
expected gene count: 10.005763497847
uncorrected p-value: 7.1105046558808e-05
GO ID	term	observed gene count	expected gene count	uncorrected p-value
GO:0048190	wing disc dorsal/ventral pattern formation	15	6.44207	0.00107549
GO:0007450	dorsal/ventral pattern formation, imaginal disc	3	1.37065	0.14733
GO:0035222	wing disc pattern formation	3	1.91891	0.29917
GO:0007447	imaginal disc pattern formation	2	1.50772	0.45724
Cluster 44: establishment of apical/basal cell polarity
observed gene count: 13
expected gene count: 4.38608810864525
uncorrected p-value: 0.000157782856934566
GO ID	term	observed gene count	expected gene count	uncorrected p-value
GO:0045197	establishment or maintenance of epithelial cell apical/basal polarity	7	2.33011	0.00497025
GO:0035089	establishment of apical/basal cell polarity	2	0.274131	0.018779
GO:0035088	establishment or maintenance of apical/basal cell polarity	4	1.64478	0.0702062
GO:0045198	establishment of epithelial cell apical/basal polarity	3	1.23359	0.114301
Cluster 45: primary microRNA processing
observed gene count: 7
expected gene count: 1.5077177873468
uncorrected p-value: 0.000178939977788073
GO ID	term	observed gene count	expected gene count	uncorrected p-value
GO:0045071	negative regulation of viral genome replication	3	0.548261	0.00923104
GO:0030422	RNA interference, production of siRNA	4	1.09652	0.0155584
GO:0031053	primary microRNA processing	2	0.274131	0.018779
GO:0035196	gene silencing by miRNA, production of miRNAs	1	0.274131	0.255351
Cluster 46: regulation of actin filament length
observed gene count: 15
expected gene count: 5.61967538920172
uncorrected p-value: 0.000202654791986529
GO ID	term	observed gene count	expected gene count	uncorrected p-value
GO:0007300	ovarian nurse cell to oocyte transport	8	1.78185	8.31433e-05
GO:0007303	cytoplasmic transport, nurse cell to oocyte	6	2.05598	0.0108893
GO:0008064	regulation of actin polymerization or depolymerization	4	1.09652	0.0155584
GO:0030832	regulation of actin filament length	1	0.137065	0.137065
GO:0032956	regulation of actin cytoskeleton organization	2	0.959457	0.247479
GO:0051493	regulation of cytoskeleton organization	1	0.685326	0.521542
Cluster 47: DNA amplification
observed gene count: 11
expected gene count: 3.56369658827426
uncorrected p-value: 0.000331505397161735
GO ID	term	observed gene count	expected gene count	uncorrected p-value
GO:0007307	eggshell chorion gene amplification	9	2.46717	0.000253056
GO:0006275	regulation of DNA replication	3	0.548261	0.00923104
GO:0008156	negative regulation of DNA replication	2	0.959457	0.247479
GO:0006277	DNA amplification	1	0.274131	0.255351
Cluster 48: rRNA processing
observed gene count: 18
expected gene count: 7.81271944352435
uncorrected p-value: 0.000409531446030552
GO ID	term	observed gene count	expected gene count	uncorrected p-value
GO:0006364	rRNA processing	11	4.11196	0.00138785
GO:0042254	ribosome biogenesis	8	3.83783	0.0302148
GO:0016072	rRNA metabolic process	1	0.274131	0.255351
Cluster 49: imaginal disc-derived leg morphogenesis
observed gene count: 19
expected gene count: 8.63511096389533
uncorrected p-value: 0.00054798451145494
GO ID	term	observed gene count	expected gene count	uncorrected p-value
GO:0007480	imaginal disc-derived leg morphogenesis	19	7.53859	7.43291e-05
Cluster 50: transcription from RNA polymerase III promoter
observed gene count: 7
expected gene count: 1.78184829413713
uncorrected p-value: 0.000723185443957804
GO ID	term	observed gene count	expected gene count	uncorrected p-value
GO:0042796	snRNA transcription from RNA polymerase III promoter	4	0.548261	0.000352064
GO:0006383	transcription from RNA polymerase III promoter	3	1.23359	0.114301
Cluster 51: regulation of JNK cascade
observed gene count: 6
expected gene count: 1.37065253395164
uncorrected p-value: 0.000842333543364565
GO ID	term	observed gene count	expected gene count	uncorrected p-value
GO:0046328	regulation of JNK cascade	5	1.23359	0.00375143
GO:0043408	regulation of MAPKKK cascade	1	0.137065	0.137065
Cluster 52: hemopoiesis
observed gene count: 19
expected gene count: 9.04630672408082
uncorrected p-value: 0.00103042939313232
GO ID	term	observed gene count	expected gene count	uncorrected p-value
GO:0030097	hemopoiesis	10	2.87837	0.000190394
GO:0035099	hemocyte migration	6	2.46717	0.0281255
GO:0007390	germ-band shortening	5	2.60424	0.107856
GO:0042386	hemocyte differentiation	2	0.959457	0.247479
GO:0030031	cell projection assembly	3	1.91891	0.29917
GO:0035162	embryonic hemopoiesis	1	0.685326	0.521542
Cluster 53: RNA catabolic process
observed gene count: 8
expected gene count: 2.46717456111295
uncorrected p-value: 0.00149263575395495
GO ID	term	observed gene count	expected gene count	uncorrected p-value
GO:0000184	nuclear-transcribed mRNA catabolic process, nonsense-mediated decay	6	1.64478	0.00289826
GO:0006402	mRNA catabolic process	2	0.685326	0.141443
GO:0006401	RNA catabolic process	1	0.274131	0.255351
GO:0000956	nuclear-transcribed mRNA catabolic process	1	0.411196	0.35743
Cluster 54: axon extension
observed gene count: 31
expected gene count: 18.2296787015568
uncorrected p-value: 0.0018216609278477
GO ID	term	observed gene count	expected gene count	uncorrected p-value
GO:0001738	morphogenesis of a polarized epithelium	10	2.19304	8.3266e-06
GO:0032231	regulation of actin filament bundle formation	3	0.411196	0.00257181
GO:0042067	establishment of ommatidial polarity	10	3.97489	0.00382701
GO:0016318	ommatidial rotation	9	3.83783	0.00997838
GO:0007164	establishment of tissue polarity	3	0.959457	0.0586689
GO:0001736	establishment of planar polarity	7	4.11196	0.106727
GO:0001737	establishment of imaginal disc-derived wing hair orientation	6	3.42663	0.117277
GO:0007398	ectoderm development	5	3.1525	0.199093
GO:0035317	imaginal disc-derived wing hair organization	4	2.46717	0.226231
GO:0048675	axon extension	4	2.74131	0.290148
GO:0008544	epidermis development	3	1.91891	0.29917
Cluster 55: germ-line stem cell maintenance
observed gene count: 13
expected gene count: 5.48261013580656
uncorrected p-value: 0.00189200717257792
GO ID	term	observed gene count	expected gene count	uncorrected p-value
GO:0030718	germ-line stem cell maintenance	13	5.07141	0.000832867
GO:0045705	negative regulation of salivary gland boundary specification	3	1.09652	0.0845351
Cluster 56: metaphase plate congression
observed gene count: 7
expected gene count: 2.05597880092746
uncorrected p-value: 0.00211045169965972
GO ID	term	observed gene count	expected gene count	uncorrected p-value
GO:0051310	metaphase plate congression	3	0.411196	0.00257181
GO:0007080	mitotic metaphase plate congression	4	1.64478	0.0702062
Cluster 57: heparin biosynthetic process
observed gene count: 12
expected gene count: 5.07141437562107
uncorrected p-value: 0.00285411845742427
GO ID	term	observed gene count	expected gene count	uncorrected p-value
GO:0008101	decapentaplegic receptor signaling pathway	6	1.50772	0.00163841
GO:0006044	N-acetylglucosamine metabolic process	4	1.09652	0.0155584
GO:0015012	heparan sulfate proteoglycan biosynthetic process	5	1.64478	0.0165223
GO:0030203	glycosaminoglycan metabolic process	2	0.274131	0.018779
GO:0015014	heparan sulfate proteoglycan biosynthetic process, polysaccharide chain biosynthetic process	2	0.548261	0.093156
GO:0030210	heparin biosynthetic process	1	0.137065	0.137065
GO:0006029	proteoglycan metabolic process	1	0.137065	0.137065
GO:0006024	glycosaminoglycan biosynthetic process	2	0.959457	0.247479
GO:0030166	proteoglycan biosynthetic process	1	0.548261	0.445522
Cluster 58: protein amino acid N-linked glycosylation
observed gene count: 6
expected gene count: 1.64478304074197
uncorrected p-value: 0.00289826426532188
GO ID	term	observed gene count	expected gene count	uncorrected p-value
GO:0006487	protein amino acid N-linked glycosylation	5	1.50772	0.0108456
GO:0018279	protein amino acid N-linked glycosylation via asparagine	2	0.411196	0.0511935
Cluster 59: tube morphogenesis
observed gene count: 32
expected gene count: 19.6003312355084
uncorrected p-value: 0.00309028097461796
GO ID	term	observed gene count	expected gene count	uncorrected p-value
GO:0007443	Malpighian tubule morphogenesis	11	4.38609	0.00252524
GO:0035239	tube morphogenesis	3	0.548261	0.00923104
GO:0007442	hindgut morphogenesis	7	2.60424	0.0100488
GO:0007424	open tracheal system development	20	14.5289	0.0834844
GO:0048619	embryonic hindgut morphogenesis	1	0.685326	0.521542
Cluster 60: ring gland development
observed gene count: 10
expected gene count: 3.97489234845975
uncorrected p-value: 0.00382700713180461
GO ID	term	observed gene count	expected gene count	uncorrected p-value
GO:0007362	terminal region determination	10	3.70076	0.00208705
GO:0035271	ring gland development	3	0.685326	0.0207262
Cluster 61: salivary gland development
observed gene count: 17
expected gene count: 8.63511096389533
uncorrected p-value: 0.00392711792606228
GO ID	term	observed gene count	expected gene count	uncorrected p-value
GO:0007435	salivary gland morphogenesis	15	6.85326	0.00215912
GO:0007431	salivary gland development	6	3.42663	0.117277
Cluster 62: positive regulation of neuron differentiation
observed gene count: 4
expected gene count: 0.822391520370984
uncorrected p-value: 0.00419065214236551
GO ID	term	observed gene count	expected gene count	uncorrected p-value
GO:0046534	positive regulation of photoreceptor cell differentiation	2	0.548261	0.093156
GO:0046532	regulation of photoreceptor cell differentiation	1	0.137065	0.137065
GO:0045666	positive regulation of neuron differentiation	1	0.137065	0.137065
Cluster 63: growth
observed gene count: 26
expected gene count: 15.3513083802584
uncorrected p-value: 0.00431462445485173
GO ID	term	observed gene count	expected gene count	uncorrected p-value
GO:0007254	JNK cascade	9	3.42663	0.00432382
GO:0007394	dorsal closure, elongation of leading edge cells	5	1.64478	0.0165223
GO:0016049	cell growth	5	1.91891	0.0330356
GO:0030032	lamellipodium assembly	3	0.959457	0.0586689
GO:0016476	regulation of embryonic cell shape	4	2.33011	0.19575
GO:0031098	stress-activated protein kinase signaling pathway	1	0.274131	0.255351
GO:0030031	cell projection assembly	3	1.91891	0.29917
GO:0008361	regulation of cell size	3	2.05598	0.339142
GO:0048589	developmental growth	1	0.548261	0.445522
GO:0040007	growth	2	2.87837	0.804055
Cluster 64: ventral cord development
observed gene count: 14
expected gene count: 6.71619741636303
uncorrected p-value: 0.00489293766003927
GO ID	term	observed gene count	expected gene count	uncorrected p-value
GO:0007400	neuroblast fate determination	10	3.70076	0.00208705
GO:0007419	ventral cord development	9	4.52315	0.0296531
GO:0007402	ganglion mother cell fate determination	3	1.23359	0.114301
GO:0014016	neuroblast differentiation	1	0.137065	0.137065
Cluster 65: terminal region determination
observed gene count: 11
expected gene count: 4.79728386883074
uncorrected p-value: 0.00552968167644357
GO ID	term	observed gene count	expected gene count	uncorrected p-value
GO:0007362	terminal region determination	10	3.70076	0.00208705
GO:0030510	regulation of BMP signaling pathway	3	1.09652	0.0845351
GO:0017015	regulation of transforming growth factor beta receptor signaling pathway	2	0.548261	0.093156
Cluster 66: oocyte fate determination
observed gene count: 10
expected gene count: 4.24902285525008
uncorrected p-value: 0.00655071643663293
GO ID	term	observed gene count	expected gene count	uncorrected p-value
GO:0007294	germarium-derived oocyte fate determination	10	3.83783	0.00285278
GO:0030716	oocyte fate determination	1	0.411196	0.35743
Cluster 67: branch fusion, open tracheal system
observed gene count: 13
expected gene count: 6.30500165617754
uncorrected p-value: 0.00726930084152783
GO ID	term	observed gene count	expected gene count	uncorrected p-value
GO:0060446	branching involved in open tracheal system development	4	1.09652	0.0155584
GO:0035147	branch fusion, open tracheal system	5	2.87837	0.150551
GO:0007428	primary branching, open tracheal system	3	2.05598	0.339142
GO:0001763	morphogenesis of a branching structure	1	0.959457	0.643754
Cluster 68: regulation of axonogenesis
observed gene count: 10
expected gene count: 4.38608810864525
uncorrected p-value: 0.00838048007970659
GO ID	term	observed gene count	expected gene count	uncorrected p-value
GO:0050770	regulation of axonogenesis	8	2.19304	0.000566327
GO:0046532	regulation of photoreceptor cell differentiation	1	0.137065	0.137065
GO:0050767	regulation of neurogenesis	1	1.09652	0.692606
Cluster 69: DNA amplification
observed gene count: 22
expected gene count: 13.1582643259357
uncorrected p-value: 0.00959174215430189
GO ID	term	observed gene count	expected gene count	uncorrected p-value
GO:0007307	eggshell chorion gene amplification	9	2.46717	0.000253056
GO:0046843	dorsal appendage formation	9	4.66022	0.0355809
GO:0006277	DNA amplification	1	0.274131	0.255351
GO:0007304	chorion-containing eggshell formation	4	4.38609	0.656338
GO:0007306	eggshell chorion assembly	2	2.60424	0.75608
Cluster 70: positive regulation of cell cycle
observed gene count: 6
expected gene count: 2.05597880092746
uncorrected p-value: 0.0108893481841106
GO ID	term	observed gene count	expected gene count	uncorrected p-value
GO:0045931	positive regulation of mitotic cell cycle	3	0.959457	0.0586689
GO:0045787	positive regulation of cell cycle	3	1.09652	0.0845351
Cluster 71: induction of apoptosis
observed gene count: 15
expected gene count: 8.08684995031467
uncorrected p-value: 0.0116185435163982
GO ID	term	observed gene count	expected gene count	uncorrected p-value
GO:0006917	induction of apoptosis	5	2.60424	0.107856
GO:0042981	regulation of apoptosis	5	2.74131	0.128394
GO:0010941	regulation of cell death	2	0.822392	0.193533
GO:0043067	regulation of programmed cell death	2	0.959457	0.247479
GO:0043065	positive regulation of apoptosis	2	1.23359	0.355363
GO:0043068	positive regulation of programmed cell death	1	0.685326	0.521542
Cluster 72: mitotic cell cycle, embryonic
observed gene count: 8
expected gene count: 3.28956608148393
uncorrected p-value: 0.0117681371110239
GO ID	term	observed gene count	expected gene count	uncorrected p-value
GO:0045448	mitotic cell cycle, embryonic	4	1.23359	0.025004
GO:0035186	syncytial blastoderm mitotic cell cycle	4	2.05598	0.139285
Cluster 73: oogenesis
observed gene count: 79
expected gene count: 61.9534945346141
uncorrected p-value: 0.0126144194670951
GO ID	term	observed gene count	expected gene count	uncorrected p-value
GO:0048477	oogenesis	65	27.276	4.9431e-12
GO:0030707	ovarian follicle cell development	20	7.40152	1.49932e-05
GO:0032504	multicellular organism reproduction	5	29.8802	1
Cluster 74: regulation of cell growth
observed gene count: 13
expected gene count: 6.8532626697582
uncorrected p-value: 0.015033236212319
GO ID	term	observed gene count	expected gene count	uncorrected p-value
GO:0045793	positive regulation of cell size	5	2.87837	0.150551
GO:0001558	regulation of cell growth	4	2.19304	0.166666
GO:0030307	positive regulation of cell growth	4	2.60424	0.257797
GO:0045927	positive regulation of growth	1	1.50772	0.802528
Cluster 75: ommatidial rotation
observed gene count: 11
expected gene count: 5.61967538920172
uncorrected p-value: 0.0193141630698466
GO ID	term	observed gene count	expected gene count	uncorrected p-value
GO:0016318	ommatidial rotation	9	3.83783	0.00997838
GO:0007464	R3/R4 cell fate commitment	5	2.19304	0.0571418
Cluster 76: negative regulation of RNA splicing
observed gene count: 3
expected gene count: 0.68532626697582
uncorrected p-value: 0.0207261625354009
GO ID	term	observed gene count	expected gene count	uncorrected p-value
GO:0048025	negative regulation of nuclear mRNA splicing, via spliceosome	2	0.411196	0.0511935
GO:0033119	negative regulation of RNA splicing	1	0.274131	0.255351
Cluster 77: protein ubiquitination
observed gene count: 10
expected gene count: 5.07141437562107
uncorrected p-value: 0.0239066129066824
GO ID	term	observed gene count	expected gene count	uncorrected p-value
GO:0016567	protein ubiquitination	10	5.07141	0.0239066
Cluster 78: mitochondrial DNA replication
observed gene count: 4
expected gene count: 1.23358728055648
uncorrected p-value: 0.0250040352167004
GO ID	term	observed gene count	expected gene count	uncorrected p-value
GO:0006264	mitochondrial DNA replication	3	0.685326	0.0207262
GO:0000002	mitochondrial genome maintenance	1	0.685326	0.521542
Cluster 79: gonad development
observed gene count: 14
expected gene count: 8.08684995031467
uncorrected p-value: 0.0259700407073017
GO ID	term	observed gene count	expected gene count	uncorrected p-value
GO:0008406	gonad development	9	4.52315	0.0296531
GO:0008585	female gonad development	3	1.50772	0.182961
GO:0007548	sex differentiation	2	2.19304	0.66532
Cluster 80: protein processing
observed gene count: 6
expected gene count: 2.46717456111295
uncorrected p-value: 0.0281254746292328
GO ID	term	observed gene count	expected gene count	uncorrected p-value
GO:0016485	protein processing	6	2.46717	0.0281255
Cluster 81: organ growth
observed gene count: 7
expected gene count: 3.15250082808877
uncorrected p-value: 0.029904790292256
GO ID	term	observed gene count	expected gene count	uncorrected p-value
GO:0007446	imaginal disc growth	5	2.33011	0.0721406
GO:0035265	organ growth	1	0.411196	0.35743
GO:0048589	developmental growth	1	0.548261	0.445522
Cluster 82: sensory organ boundary specification
observed gene count: 7
expected gene count: 3.28956608148393
uncorrected p-value: 0.0373728239551164
GO ID	term	observed gene count	expected gene count	uncorrected p-value
GO:0016360	sensory organ precursor cell fate determination	7	2.87837	0.0181223
GO:0008052	sensory organ boundary specification	2	0.959457	0.247479
Cluster 83: methylation
observed gene count: 11
expected gene count: 6.30500165617754
uncorrected p-value: 0.0430748951877808
GO ID	term	observed gene count	expected gene count	uncorrected p-value
GO:0016571	histone methylation	6	1.78185	0.00476262
GO:0006479	protein amino acid methylation	3	0.959457	0.0586689
GO:0034968	histone lysine methylation	1	0.137065	0.137065
GO:0032259	methylation	1	1.23359	0.734761
Cluster 84: oocyte microtubule cytoskeleton organization
observed gene count: 6
expected gene count: 2.74130506790328
uncorrected p-value: 0.0462418905884752
GO ID	term	observed gene count	expected gene count	uncorrected p-value
GO:0016325	oocyte microtubule cytoskeleton organization	4	1.91891	0.113904
GO:0030951	establishment or maintenance of microtubule cytoskeleton polarity	2	0.822392	0.193533
Cluster 85: DNA recombination
observed gene count: 10
expected gene count: 5.61967538920172
uncorrected p-value: 0.0464080881339809
GO ID	term	observed gene count	expected gene count	uncorrected p-value
GO:0007131	reciprocal meiotic recombination	7	3.28957	0.0373728
GO:0006310	DNA recombination	4	2.33011	0.19575
Cluster 86: negative regulation of neurogenesis
observed gene count: 4
expected gene count: 1.5077177873468
uncorrected p-value: 0.0523115632298354
GO ID	term	observed gene count	expected gene count	uncorrected p-value
GO:0007406	negative regulation of neuroblast proliferation	3	0.959457	0.0586689
GO:0050768	negative regulation of neurogenesis	1	0.548261	0.445522
Cluster 87: protein polymerization
observed gene count: 6
expected gene count: 2.87837032129844
uncorrected p-value: 0.0574897143750527
GO ID	term	observed gene count	expected gene count	uncorrected p-value
GO:0030041	actin filament polymerization	2	0.685326	0.141443
GO:0051258	protein polymerization	3	1.78185	0.259471
GO:0008154	actin polymerization or depolymerization	1	0.548261	0.445522
Cluster 88: positive regulation of cell size
observed gene count: 8
expected gene count: 4.38608810864525
uncorrected p-value: 0.0624719028816784
GO ID	term	observed gene count	expected gene count	uncorrected p-value
GO:0045793	positive regulation of cell size	5	2.87837	0.150551
GO:0040014	regulation of multicellular organism growth	3	2.05598	0.339142
Cluster 89: telomere maintenance
observed gene count: 4
expected gene count: 1.64478304074197
uncorrected p-value: 0.0702061874083888
GO ID	term	observed gene count	expected gene count	uncorrected p-value
GO:0000723	telomere maintenance	4	1.64478	0.0702062
Cluster 90: regulation of cell growth
observed gene count: 10
expected gene count: 6.03087114938721
uncorrected p-value: 0.0705127282676034
GO ID	term	observed gene count	expected gene count	uncorrected p-value
GO:0046621	negative regulation of organ growth	6	1.50772	0.00163841
GO:0001558	regulation of cell growth	4	2.19304	0.166666
GO:0046620	regulation of organ growth	2	2.19304	0.66532
GO:0045926	negative regulation of growth	1	1.37065	0.771138
Cluster 91: regulation of phosphorylation
observed gene count: 8
expected gene count: 4.52315336204041
uncorrected p-value: 0.0729739117142733
GO ID	term	observed gene count	expected gene count	uncorrected p-value
GO:0042325	regulation of phosphorylation	4	1.09652	0.0155584
GO:0006469	negative regulation of protein kinase activity	1	0.137065	0.137065
GO:0043085	positive regulation of catalytic activity	1	0.137065	0.137065
GO:0001932	regulation of protein amino acid phosphorylation	2	0.822392	0.193533
GO:0043086	negative regulation of catalytic activity	1	0.274131	0.255351
Cluster 92: protein amino acid glycosylation
observed gene count: 10
expected gene count: 6.16793640278238
uncorrected p-value: 0.0800253784444386
GO ID	term	observed gene count	expected gene count	uncorrected p-value
GO:0006487	protein amino acid N-linked glycosylation	5	1.50772	0.0108456
GO:0006486	protein amino acid glycosylation	5	4.38609	0.451543
Cluster 93: spermatogenesis
observed gene count: 24
expected gene count: 17.9555481947665
uncorrected p-value: 0.0823174361461705
GO ID	term	observed gene count	expected gene count	uncorrected p-value
GO:0007286	spermatid development	8	5.61968	0.191658
GO:0007283	spermatogenesis	15	13.0212	0.31881
GO:0048515	spermatid differentiation	1	1.09652	0.692606
Cluster 94: apoptosis
observed gene count: 12
expected gene count: 7.81271944352435
uncorrected p-value: 0.0827000398975044
GO ID	term	observed gene count	expected gene count	uncorrected p-value
GO:0006915	apoptosis	12	6.03087	0.0130493
GO:0012501	programmed cell death	2	2.05598	0.629523
GO:0008219	cell death	1	1.50772	0.802528
Cluster 95: RNA methylation
observed gene count: 4
expected gene count: 1.78184829413713
uncorrected p-value: 0.0907991037209181
GO ID	term	observed gene count	expected gene count	uncorrected p-value
GO:0001510	RNA methylation	3	1.09652	0.0845351
GO:0031167	rRNA methylation	1	0.137065	0.137065
Cluster 96: locomotor rhythm
observed gene count: 12
expected gene count: 7.94978469691951
uncorrected p-value: 0.0918902185745974
GO ID	term	observed gene count	expected gene count	uncorrected p-value
GO:0045475	locomotor rhythm	10	5.75674	0.0537169
GO:0007623	circadian rhythm	5	4.52315	0.479619
GO:0007622	rhythmic behavior	2	1.78185	0.549143
Cluster 97: lymph gland development
observed gene count: 7
expected gene count: 3.97489234845975
uncorrected p-value: 0.0921939476409933
GO ID	term	observed gene count	expected gene count	uncorrected p-value
GO:0035171	lamellocyte differentiation	3	0.685326	0.0207262
GO:0035167	larval lymph gland hemopoiesis	3	1.09652	0.0845351
GO:0048542	lymph gland development	4	2.46717	0.226231
GO:0042386	hemocyte differentiation	2	0.959457	0.247479
Cluster 98: positive regulation of transcription initiation from RNA polymerase II promoter
observed gene count: 2
expected gene count: 0.548261013580656
uncorrected p-value: 0.0931560179289868
GO ID	term	observed gene count	expected gene count	uncorrected p-value
GO:0060261	positive regulation of transcription initiation from RNA polymerase II promoter	2	0.274131	0.018779
Cluster 99: histone demethylation
observed gene count: 2
expected gene count: 0.548261013580656
uncorrected p-value: 0.0931560179289868
GO ID	term	observed gene count	expected gene count	uncorrected p-value
GO:0016577	histone demethylation	2	0.548261	0.093156
Cluster 100: rhabdomere development
observed gene count: 11
expected gene count: 7.40152368333885
uncorrected p-value: 0.112870907233705
GO ID	term	observed gene count	expected gene count	uncorrected p-value
GO:0042051	compound eye photoreceptor development	5	3.1525	0.199093
GO:0042462	eye photoreceptor cell development	1	0.274131	0.255351
GO:0042052	rhabdomere development	6	4.52315	0.29432
GO:0042461	photoreceptor cell development	1	0.411196	0.35743
Cluster 101: regulation of translation
observed gene count: 4
expected gene count: 1.9189135475323
uncorrected p-value: 0.11390448690168
GO ID	term	observed gene count	expected gene count	uncorrected p-value
GO:0006417	regulation of translation	4	1.78185	0.0907991
Cluster 102: regulation of DNA binding
observed gene count: 6
expected gene count: 3.4266313348791
uncorrected p-value: 0.117276877427253
GO ID	term	observed gene count	expected gene count	uncorrected p-value
GO:0051090	regulation of transcription factor activity	5	2.60424	0.107856
GO:0051101	regulation of DNA binding	1	0.411196	0.35743
Cluster 103: G1/S transition of mitotic cell cycle
observed gene count: 5
expected gene count: 2.74130506790328
uncorrected p-value: 0.128393510541312
GO ID	term	observed gene count	expected gene count	uncorrected p-value
GO:0000082	G1/S transition of mitotic cell cycle	4	1.91891	0.113904
GO:0000086	G2/M transition of mitotic cell cycle	2	1.09652	0.301793
Cluster 104: immune response
observed gene count: 18
expected gene count: 13.7065253395164
uncorrected p-value: 0.135313491758108
GO ID	term	observed gene count	expected gene count	uncorrected p-value
GO:0019730	antimicrobial humoral response	11	5.61968	0.0193142
GO:0006959	humoral immune response	4	2.87837	0.322995
GO:0006955	immune response	8	6.85326	0.377412
Cluster 105: tRNA metabolic process
observed gene count: 1
expected gene count: 0.137065253395164
uncorrected p-value: 0.137065253395164
GO ID	term	observed gene count	expected gene count	uncorrected p-value
GO:0006399	tRNA metabolic process	1	0.137065	0.137065
Cluster 106: regulation of apoptosis
observed gene count: 15
expected gene count: 11.5134812851938
uncorrected p-value: 0.169659525619081
GO ID	term	observed gene count	expected gene count	uncorrected p-value
GO:0042981	regulation of apoptosis	5	2.74131	0.128394
GO:0043066	negative regulation of apoptosis	10	7.12739	0.167243
GO:0060548	negative regulation of cell death	1	1.50772	0.802528
Cluster 107: negative regulation of translation
observed gene count: 5
expected gene count: 3.01543557469361
uncorrected p-value: 0.174174143668567
GO ID	term	observed gene count	expected gene count	uncorrected p-value
GO:0017148	negative regulation of translation	5	3.01544	0.174174
Cluster 108: synaptogenesis
observed gene count: 7
expected gene count: 4.79728386883074
uncorrected p-value: 0.195532187858936
GO ID	term	observed gene count	expected gene count	uncorrected p-value
GO:0007416	synaptogenesis	6	3.42663	0.117277
GO:0050808	synapse organization	1	1.64478	0.829614
Cluster 109: regulation of Rab GTPase activity
observed gene count: 8
expected gene count: 5.75674064259689
uncorrected p-value: 0.210308165448237
GO ID	term	observed gene count	expected gene count	uncorrected p-value
GO:0032313	regulation of Rab GTPase activity	7	3.5637	0.0557297
GO:0051056	regulation of small GTPase mediated signal transduction	1	1.09652	0.692606
Cluster 110: axonal fasciculation
observed gene count: 9
expected gene count: 6.71619741636303
uncorrected p-value: 0.222035350774291
GO ID	term	observed gene count	expected gene count	uncorrected p-value
GO:0007413	axonal fasciculation	4	2.19304	0.166666
GO:0016199	axon midline choice point recognition	5	3.42663	0.25209
Cluster 111: regulation of histone acetylation
observed gene count: 1
expected gene count: 0.274130506790328
uncorrected p-value: 0.255351459220353
GO ID	term	observed gene count	expected gene count	uncorrected p-value
GO:0035065	regulation of histone acetylation	1	0.274131	0.255351
Cluster 112: determination of adult life span
observed gene count: 23
expected gene count: 19.8744617422988
uncorrected p-value: 0.256521078095194
GO ID	term	observed gene count	expected gene count	uncorrected p-value
GO:0008340	determination of adult life span	23	19.7374	0.245586
Cluster 113: learning
observed gene count: 18
expected gene count: 15.2142431268632
uncorrected p-value: 0.25691156753912
GO ID	term	observed gene count	expected gene count	uncorrected p-value
GO:0007611	learning or memory	9	5.34554	0.0772284
GO:0008355	olfactory learning	11	7.40152	0.112871
GO:0042048	olfactory behavior	7	5.89381	0.374985
GO:0007612	learning	1	1.78185	0.852987
Cluster 114: startle response
observed gene count: 4
expected gene count: 2.60423981450812
uncorrected p-value: 0.257797230542082
GO ID	term	observed gene count	expected gene count	uncorrected p-value
GO:0001964	startle response	4	1.91891	0.113904
GO:0031987	locomotion involved in locomotory behavior	4	2.19304	0.166666
GO:0048854	brain morphogenesis	4	2.19304	0.166666
Cluster 115: response to ecdysone
observed gene count: 4
expected gene count: 2.60423981450812
uncorrected p-value: 0.257797230542082
GO ID	term	observed gene count	expected gene count	uncorrected p-value
GO:0035076	ecdysone receptor-mediated signaling pathway	3	1.09652	0.0845351
GO:0035075	response to ecdysone	1	1.64478	0.829614
Cluster 116: cell adhesion
observed gene count: 21
expected gene count: 18.2296787015568
uncorrected p-value: 0.275936601785506
GO ID	term	observed gene count	expected gene count	uncorrected p-value
GO:0016337	cell-cell adhesion	7	2.87837	0.0181223
GO:0007155	cell adhesion	16	16.3108	0.573767
Cluster 117: homeostatic process
observed gene count: 9
expected gene count: 7.12739317654853
uncorrected p-value: 0.278319868140437
GO ID	term	observed gene count	expected gene count	uncorrected p-value
GO:0042592	homeostatic process	1	0.137065	0.137065
GO:0045454	cell redox homeostasis	8	6.85326	0.377412
Cluster 118: innate immune response
observed gene count: 9
expected gene count: 7.26445842994369
uncorrected p-value: 0.297928837734946
GO ID	term	observed gene count	expected gene count	uncorrected p-value
GO:0002805	regulation of antimicrobial peptide biosynthetic process	4	1.37065	0.037233
GO:0002807	positive regulation of antimicrobial peptide biosynthetic process	1	0.137065	0.137065
GO:0045087	innate immune response	4	5.34554	0.801243
Cluster 119: regulation of synaptogenesis
observed gene count: 13
expected gene count: 10.9652202716131
uncorrected p-value: 0.29831476344783
GO ID	term	observed gene count	expected gene count	uncorrected p-value
GO:0045887	positive regulation of synaptic growth at neuromuscular junction	6	2.05598	0.0108893
GO:0050807	regulation of synapse organization	3	1.37065	0.14733
GO:0051963	regulation of synaptogenesis	1	0.274131	0.255351
GO:0016202	regulation of striated muscle tissue development	1	0.959457	0.643754
GO:0045927	positive regulation of growth	1	1.50772	0.802528
GO:0008582	regulation of synaptic growth at neuromuscular junction	2	3.1525	0.843445
GO:0050803	regulation of synapse structure and activity	1	1.91891	0.873154
Cluster 120: nuclear migration
observed gene count: 3
expected gene count: 1.9189135475323
uncorrected p-value: 0.299170496966416
GO ID	term	observed gene count	expected gene count	uncorrected p-value
GO:0035190	syncytial nuclear migration	2	0.411196	0.0511935
GO:0007097	nuclear migration	1	0.822392	0.587143
Cluster 121: DNA damage checkpoint
observed gene count: 3
expected gene count: 1.9189135475323
uncorrected p-value: 0.299170496966416
GO ID	term	observed gene count	expected gene count	uncorrected p-value
GO:0000077	DNA damage checkpoint	3	1.50772	0.182961
GO:0000075	cell cycle checkpoint	1	0.822392	0.587143
Cluster 122: female germ-line sex determination
observed gene count: 2
expected gene count: 1.09652202716131
uncorrected p-value: 0.301793263123624
GO ID	term	observed gene count	expected gene count	uncorrected p-value
GO:0019099	female germ-line sex determination	2	0.548261	0.093156
Cluster 123: muscle fiber development
observed gene count: 2
expected gene count: 1.09652202716131
uncorrected p-value: 0.301793263123624
GO ID	term	observed gene count	expected gene count	uncorrected p-value
GO:0048747	muscle fiber development	2	1.09652	0.301793
Cluster 124: ecdysone metabolic process
observed gene count: 5
expected gene count: 3.70076184166943
uncorrected p-value: 0.308047274231162
GO ID	term	observed gene count	expected gene count	uncorrected p-value
GO:0006697	ecdysone biosynthetic process	4	1.23359	0.025004
GO:0008205	ecdysone metabolic process	1	0.411196	0.35743
GO:0006694	steroid biosynthetic process	1	0.685326	0.521542
Cluster 125: mesoderm development
observed gene count: 16
expected gene count: 14.2547863530971
uncorrected p-value: 0.349810231930595
GO ID	term	observed gene count	expected gene count	uncorrected p-value
GO:0007443	Malpighian tubule morphogenesis	11	4.38609	0.00252524
GO:0001710	mesodermal cell fate commitment	3	0.822392	0.0372617
GO:0048619	embryonic hindgut morphogenesis	1	0.685326	0.521542
GO:0007498	mesoderm development	5	9.18337	0.961936
Cluster 126: maintenance of protein location
observed gene count: 2
expected gene count: 1.23358728055648
uncorrected p-value: 0.355362584585242
GO ID	term	observed gene count	expected gene count	uncorrected p-value
GO:0045185	maintenance of protein location	1	0.548261	0.445522
GO:0032507	maintenance of protein location in cell	1	0.685326	0.521542
Cluster 127: negative regulation of protein import into nucleus
observed gene count: 1
expected gene count: 0.411195760185492
uncorrected p-value: 0.35743042502391
GO ID	term	observed gene count	expected gene count	uncorrected p-value
GO:0042308	negative regulation of protein import into nucleus	1	0.411196	0.35743
Cluster 128: adult behavior
observed gene count: 7
expected gene count: 5.89380589599205
uncorrected p-value: 0.374985350673209
GO ID	term	observed gene count	expected gene count	uncorrected p-value
GO:0008344	adult locomotory behavior	5	3.70076	0.308047
GO:0030534	adult behavior	1	0.822392	0.587143
GO:0007626	locomotory behavior	1	1.78185	0.852987
Cluster 129: response to insulin stimulus
observed gene count: 4
expected gene count: 3.28956608148393
uncorrected p-value: 0.421909599177818
GO ID	term	observed gene count	expected gene count	uncorrected p-value
GO:0032868	response to insulin stimulus	1	0.137065	0.137065
GO:0008286	insulin receptor signaling pathway	3	2.87837	0.564289
Cluster 130: intercellular bridge organization
observed gene count: 1
expected gene count: 0.548261013580656
uncorrected p-value: 0.445521894055552
GO ID	term	observed gene count	expected gene count	uncorrected p-value
GO:0043063	intercellular bridge organization	1	0.274131	0.255351
Cluster 131: histolysis
observed gene count: 10
expected gene count: 10.005763497847
uncorrected p-value: 0.552442629602304
GO ID	term	observed gene count	expected gene count	uncorrected p-value
GO:0035070	salivary gland histolysis	3	1.09652	0.0845351
GO:0007559	histolysis	1	0.274131	0.255351
GO:0035071	salivary gland cell autophagic cell death	7	9.04631	0.817891
GO:0048102	autophagic cell death	5	7.81272	0.90646
Cluster 132: vesicle coating
observed gene count: 7
expected gene count: 6.99032792315336
uncorrected p-value: 0.560071420636903
GO ID	term	observed gene count	expected gene count	uncorrected p-value
GO:0016183	synaptic vesicle coating	6	1.64478	0.00289826
GO:0006901	vesicle coating	5	1.23359	0.00375143
GO:0006727	ommochrome biosynthetic process	4	2.33011	0.19575
GO:0006726	eye pigment biosynthetic process	2	1.78185	0.549143
Cluster 133: response to heat
observed gene count: 9
expected gene count: 9.45750248426631
uncorrected p-value: 0.616815445908934
GO ID	term	observed gene count	expected gene count	uncorrected p-value
GO:0009408	response to heat	9	9.18337	0.579951
Cluster 134: cyclic nucleotide biosynthetic process
observed gene count: 3
expected gene count: 3.28956608148393
uncorrected p-value: 0.657870147094762
GO ID	term	observed gene count	expected gene count	uncorrected p-value
GO:0009190	cyclic nucleotide biosynthetic process	3	1.78185	0.259471
Cluster 135: exocytosis
observed gene count: 23
expected gene count: 24.8088108645247
uncorrected p-value: 0.685218968788367
GO ID	term	observed gene count	expected gene count	uncorrected p-value
GO:0016183	synaptic vesicle coating	6	1.64478	0.00289826
GO:0006901	vesicle coating	5	1.23359	0.00375143
GO:0007267	cell-cell signaling	4	0.959457	0.00871877
GO:0006887	exocytosis	4	2.19304	0.166666
GO:0016079	synaptic vesicle exocytosis	4	2.87837	0.322995
GO:0007269	neurotransmitter secretion	13	12.61	0.498679
GO:0048488	synaptic vesicle endocytosis	4	4.11196	0.603944
GO:0006836	neurotransmitter transport	1	3.28957	0.971013
GO:0007268	synaptic transmission	2	6.44207	0.991777
Cluster 136: protein amino acid lipidation
observed gene count: 6
expected gene count: 7.67565419012918
uncorrected p-value: 0.797851595809613
GO ID	term	observed gene count	expected gene count	uncorrected p-value
GO:0006506	GPI anchor biosynthetic process	4	2.46717	0.226231
GO:0006650	glycerophospholipid metabolic process	1	0.411196	0.35743
GO:0006497	protein amino acid lipidation	1	0.685326	0.521542
Cluster 137: mating behavior
observed gene count: 3
expected gene count: 4.52315336204041
uncorrected p-value: 0.849389523793431
GO ID	term	observed gene count	expected gene count	uncorrected p-value
GO:0007617	mating behavior	1	1.23359	0.734761
GO:0007619	courtship behavior	2	3.5637	0.889157
Cluster 138: regulation of cell fate specification
observed gene count: 1
expected gene count: 1.9189135475323
uncorrected p-value: 0.873154440678739
GO ID	term	observed gene count	expected gene count	uncorrected p-value
GO:0042659	regulation of cell fate specification	1	1.23359	0.734761
Cluster 139: visual perception
observed gene count: 1
expected gene count: 1.9189135475323
uncorrected p-value: 0.873154440678739
GO ID	term	observed gene count	expected gene count	uncorrected p-value
GO:0007601	visual perception	1	1.91891	0.873154
Cluster 140: proteolysis
observed gene count: 73
expected gene count: 85.1175223583968
uncorrected p-value: 0.935968111571991
GO ID	term	observed gene count	expected gene count	uncorrected p-value
GO:0006511	ubiquitin-dependent protein catabolic process	29	10.8282	2.41758e-07
GO:0051603	proteolysis involved in cellular protein catabolic process	7	1.09652	6.34545e-06
GO:0030163	protein catabolic process	5	2.87837	0.150551
GO:0006508	proteolysis	45	74.8376	0.999978
Cluster 141: nucleosome assembly
observed gene count: 12
expected gene count: 18.7779397151375
uncorrected p-value: 0.971443251670171
GO ID	term	observed gene count	expected gene count	uncorrected p-value
GO:0065004	protein-DNA complex assembly	3	0.411196	0.00257181
GO:0034728	nucleosome organization	1	0.137065	0.137065
GO:0006334	nucleosome assembly	7	17.6814	0.999323
GO:0006333	chromatin assembly or disassembly	5	16.4478	0.99987
Cluster 142: protein targeting to mitochondrion
observed gene count: 2
expected gene count: 5.48261013580656
uncorrected p-value: 0.979901511600699
GO ID	term	observed gene count	expected gene count	uncorrected p-value
GO:0006626	protein targeting to mitochondrion	2	3.5637	0.889157
Cluster 143: ion transport
observed gene count: 15
expected gene count: 53.0442530639285
uncorrected p-value: 0.999999999986041
GO ID	term	observed gene count	expected gene count	uncorrected p-value
GO:0030001	metal ion transport	2	1.37065	0.407371
GO:0015986	ATP synthesis coupled proton transport	1	2.46717	0.929708
GO:0006812	cation transport	1	3.83783	0.983943
GO:0015992	proton transport	1	4.24902	0.989692
GO:0006811	ion transport	1	6.57913	0.999165
GO:0055085	transmembrane transport	13	37.9671	1

## Sheet: Embryo4-6h
sample name: Embryo4-6h
number of associated genes in the sample: 1905
Cluster 1: RNA splicing
observed gene count: 149
expected gene count: 31.5501821795296
uncorrected p-value: 1.9427207521699e-70
GO ID	term	observed gene count	expected gene count	uncorrected p-value
GO:0000398	nuclear mRNA splicing, via spliceosome	131	26.8808	2.67589e-64
GO:0008380	RNA splicing	12	1.76681	1.12641e-09
GO:0006397	mRNA processing	13	2.52401	6.48474e-08
GO:0006396	RNA processing	8	2.77642	0.00393832
GO:0000375	RNA splicing, via transesterification reactions	2	0.378602	0.0437436
Cluster 2: mitosis
observed gene count: 175
expected gene count: 56.7903279231534
uncorrected p-value: 9.20210788901057e-47
GO ID	term	observed gene count	expected gene count	uncorrected p-value
GO:0007052	mitotic spindle organization	81	23.7257	1.42535e-25
GO:0007067	mitosis	52	12.1153	1.55389e-22
GO:0007049	cell cycle	24	4.66943	1.59294e-13
GO:0007076	mitotic chromosome condensation	16	2.90262	3.99547e-10
GO:0030261	chromosome condensation	13	2.52401	6.48474e-08
GO:0000070	mitotic sister chromatid segregation	14	2.90262	6.66296e-08
GO:0007059	chromosome segregation	16	4.16462	5.4602e-07
GO:0000819	sister chromatid segregation	4	0.631004	0.00113734
GO:0000278	mitotic cell cycle	10	4.03842	0.00465147
GO:0000087	M phase of mitotic cell cycle	3	0.504803	0.00726987
GO:0007051	spindle organization	5	1.38821	0.0076156
GO:0007010	cytoskeleton organization	11	5.42663	0.0154857
GO:0007017	microtubule-based process	11	5.93143	0.0293389
GO:0000226	microtubule cytoskeleton organization	7	3.91222	0.0872641
Cluster 3: transcription initiation
observed gene count: 71
expected gene count: 16.9108976482279
uncorrected p-value: 1.70759385482609e-29
GO ID	term	observed gene count	expected gene count	uncorrected p-value
GO:0006367	transcription initiation from RNA polymerase II promoter	41	8.07685	7.22453e-22
GO:0006366	transcription from RNA polymerase II promoter	33	6.05763	2.69675e-19
GO:0006351	transcription, DNA-dependent	19	5.67903	7.08535e-07
GO:0006352	transcription initiation	2	1.13581	0.317027
GO:0006461	protein complex assembly	1	0.378602	0.332851
Cluster 4: negative regulation of gene expression
observed gene count: 96
expected gene count: 30.0357734349122
uncorrected p-value: 2.14634248722573e-27
GO ID	term	observed gene count	expected gene count	uncorrected p-value
GO:0000122	negative regulation of transcription from RNA polymerase II promoter	57	17.6681	5.26075e-17
GO:0045892	negative regulation of transcription, DNA-dependent	40	10.3485	1.43004e-15
GO:0010629	negative regulation of gene expression	20	7.31964	1.47674e-05
Cluster 5: positive regulation of gene expression
observed gene count: 91
expected gene count: 28.1427625041404
uncorrected p-value: 1.81367303530876e-26
GO ID	term	observed gene count	expected gene count	uncorrected p-value
GO:0045944	positive regulation of transcription from RNA polymerase II promoter	65	20.9493	3.70579e-18
GO:0045893	positive regulation of transcription, DNA-dependent	35	9.59126	7.3514e-13
GO:0010628	positive regulation of gene expression	6	2.14541	0.0143963
Cluster 6: metamorphosis
observed gene count: 166
expected gene count: 72.4392182842001
uncorrected p-value: 2.25427485483384e-26
GO ID	term	observed gene count	expected gene count	uncorrected p-value
GO:0048749	compound eye development	38	14.5131	9.7027e-09
GO:0001745	compound eye morphogenesis	30	10.4747	3.47139e-08
GO:0007476	imaginal disc-derived wing morphogenesis	50	24.8615	7.34518e-07
GO:0007423	sensory organ development	21	7.57204	6.95305e-06
GO:0007444	imaginal disc development	14	4.16462	1.94349e-05
GO:0001654	eye development	8	1.51441	1.95941e-05
GO:0045467	R7 cell development	8	2.27161	0.000857378
GO:0001751	compound eye photoreceptor cell differentiation	9	3.15502	0.00244068
GO:0045500	sevenless signaling pathway	5	1.13581	0.00258311
GO:0035220	wing disc development	17	8.96025	0.00621807
GO:0048592	eye morphogenesis	4	1.00961	0.0116142
GO:0007472	wing disc morphogenesis	6	2.14541	0.0143963
GO:0048663	neuron fate commitment	3	0.757204	0.0298676
GO:0007552	metamorphosis	9	4.54323	0.0314019
GO:0042461	photoreceptor cell development	2	0.378602	0.0437436
GO:0046530	photoreceptor cell differentiation	2	0.504803	0.0802173
GO:0001752	compound eye photoreceptor fate commitment	3	1.13581	0.0939656
GO:0045466	R7 cell differentiation	3	1.13581	0.0939656
GO:0035107	appendage morphogenesis	1	0.126201	0.126201
GO:0035120	post-embryonic appendage morphogenesis	1	0.126201	0.126201
GO:0002165	instar larval or pupal development	3	1.38821	0.152841
GO:0042051	compound eye photoreceptor development	5	2.90262	0.155853
GO:0007560	imaginal disc morphogenesis	2	0.757204	0.169141
GO:0042462	eye photoreceptor cell development	1	0.252401	0.236482
GO:0007465	R7 cell fate commitment	2	1.64061	0.501908
Cluster 7: regulation of transcription, DNA-dependent
observed gene count: 142
expected gene count: 57.2951308380258
uncorrected p-value: 2.34446710663651e-26
GO ID	term	observed gene count	expected gene count	uncorrected p-value
GO:0006357	regulation of transcription from RNA polymerase II promoter	62	15.9013	1.20606e-23
GO:0006355	regulation of transcription, DNA-dependent	91	44.6751	1.09742e-11
Cluster 8: axonogenesis
observed gene count: 135
expected gene count: 57.0427293805896
uncorrected p-value: 5.35954322422969e-23
GO ID	term	observed gene count	expected gene count	uncorrected p-value
GO:0048813	dendrite morphogenesis	48	16.6585	2.28233e-12
GO:0007411	axon guidance	49	19.5611	4.18844e-10
GO:0007517	muscle organ development	27	7.95065	2.24437e-09
GO:0048666	neuron development	20	5.17423	1.82012e-08
GO:0007409	axonogenesis	17	6.31004	7.82036e-05
GO:0048812	neuron projection morphogenesis	25	13.2511	0.0011324
GO:0030182	neuron differentiation	5	1.13581	0.00258311
GO:0000902	cell morphogenesis	12	5.93143	0.0119093
GO:0031175	neuron projection development	1	0.378602	0.332851
Cluster 9: gene silencing
observed gene count: 59
expected gene count: 15.0178867174561
uncorrected p-value: 8.8475028497658e-23
GO ID	term	observed gene count	expected gene count	uncorrected p-value
GO:0045892	negative regulation of transcription, DNA-dependent	40	10.3485	1.43004e-15
GO:0006342	chromatin silencing	22	4.66943	2.09354e-11
GO:0016458	gene silencing	11	2.01921	2.99188e-07
GO:0045814	negative regulation of gene expression, epigenetic	1	0.126201	0.126201
GO:0040029	regulation of gene expression, epigenetic	1	0.252401	0.236482
Cluster 10: regulation of mitosis
observed gene count: 62
expected gene count: 16.6584961907917
uncorrected p-value: 2.78063562780524e-22
GO ID	term	observed gene count	expected gene count	uncorrected p-value
GO:0051726	regulation of cell cycle	33	10.2223	1.92643e-10
GO:0007346	regulation of mitotic cell cycle	18	3.91222	2.46529e-09
GO:0007088	regulation of mitosis	12	3.02882	9.83479e-06
Cluster 11: chromosome condensation
observed gene count: 44
expected gene count: 9.21265319642266
uncorrected p-value: 8.18692674748865e-22
GO ID	term	observed gene count	expected gene count	uncorrected p-value
GO:0007076	mitotic chromosome condensation	16	2.90262	3.99547e-10
GO:0030261	chromosome condensation	13	2.52401	6.48474e-08
GO:0000070	mitotic sister chromatid segregation	14	2.90262	6.66296e-08
GO:0007080	mitotic metaphase plate congression	9	1.51441	1.22633e-06
GO:0000819	sister chromatid segregation	4	0.631004	0.00113734
GO:0051310	metaphase plate congression	3	0.378602	0.00200719
Cluster 12: regulation of RNA splicing
observed gene count: 38
expected gene count: 7.445842994369
uncorrected p-value: 1.73969442718757e-20
GO ID	term	observed gene count	expected gene count	uncorrected p-value
GO:0000381	regulation of alternative nuclear mRNA splicing, via spliceosome	33	6.43624	4.68194e-18
GO:0048024	regulation of nuclear mRNA splicing, via spliceosome	6	1.00961	8.94374e-05
GO:0043484	regulation of RNA splicing	1	0.378602	0.332851
Cluster 13: dorsal closure
observed gene count: 65
expected gene count: 22.2113282543889
uncorrected p-value: 1.20070150987639e-16
GO ID	term	observed gene count	expected gene count	uncorrected p-value
GO:0007391	dorsal closure	32	11.2319	1.41753e-08
GO:0001700	embryonic development via the syncytial blastoderm	19	6.31004	4.7234e-06
GO:0002009	morphogenesis of an epithelium	11	3.15502	0.000102566
GO:0016331	morphogenesis of embryonic epithelium	4	1.00961	0.0116142
GO:0060429	epithelium development	2	0.378602	0.0437436
GO:0048598	embryonic morphogenesis	2	1.26201	0.365758
GO:0009792	embryonic development ending in birth or egg hatching	2	1.26201	0.365758
Cluster 14: nuclear export
observed gene count: 28
expected gene count: 5.55283206359722
uncorrected p-value: 3.04871859823164e-15
GO ID	term	observed gene count	expected gene count	uncorrected p-value
GO:0006406	mRNA export from nucleus	16	2.39781	2.60587e-12
GO:0051168	nuclear export	6	0.757204	4.01217e-06
GO:0006913	nucleocytoplasmic transport	5	1.00961	0.00128111
GO:0051028	mRNA transport	2	0.883405	0.217824
GO:0006403	RNA localization	1	0.378602	0.332851
Cluster 15: segmentation
observed gene count: 72
expected gene count: 28.0165617754223
uncorrected p-value: 7.76400490173334e-15
GO ID	term	observed gene count	expected gene count	uncorrected p-value
GO:0007350	blastoderm segmentation	11	2.77642	2.33228e-05
GO:0008595	determination of anterior/posterior axis, embryo	14	4.66943	8.87089e-05
GO:0009880	embryonic pattern specification	10	2.77642	0.000152869
GO:0007389	pattern specification process	9	2.65022	0.000562142
GO:0045451	pole plasm oskar mRNA localization	10	3.91222	0.00359814
GO:0007314	oocyte anterior/posterior axis specification	8	3.02882	0.0071921
GO:0009952	anterior/posterior pattern formation	6	2.27161	0.0193357
GO:0008298	intracellular mRNA localization	7	2.90262	0.0197683
GO:0035282	segmentation	5	1.76681	0.0238713
GO:0007317	regulation of pole plasm oskar mRNA localization	7	3.15502	0.0309817
GO:0007309	oocyte axis specification	5	1.89301	0.0321721
GO:0007315	pole plasm assembly	5	2.01921	0.0420652
GO:0009948	anterior/posterior axis specification	3	0.883405	0.0474325
GO:0009798	axis specification	3	1.00961	0.0689234
GO:0048599	oocyte development	2	0.883405	0.217824
GO:0019094	pole plasm mRNA localization	2	0.883405	0.217824
GO:0009994	oocyte differentiation	2	1.00961	0.267458
GO:0007281	germ cell development	5	3.78602	0.326158
GO:0045995	regulation of embryonic development	1	0.378602	0.332851
GO:0008358	maternal determination of anterior/posterior axis, embryo	1	0.504803	0.417063
GO:0007316	pole plasm RNA localization	1	0.504803	0.417063
GO:0000578	embryonic axis specification	1	0.631004	0.490649
Cluster 16: trunk segmentation
observed gene count: 40
expected gene count: 10.9794633984763
uncorrected p-value: 1.81070270697489e-14
GO ID	term	observed gene count	expected gene count	uncorrected p-value
GO:0007379	segment specification	11	2.52401	7.07551e-06
GO:0007448	anterior/posterior pattern formation, imaginal disc	6	1.00961	8.94374e-05
GO:0007380	specification of segmental identity, head	7	1.38821	0.000104665
GO:0007440	foregut morphogenesis	7	1.38821	0.000104665
GO:0007473	wing disc proximal/distal pattern formation	5	0.757204	0.00017113
GO:0048100	wing disc anterior/posterior pattern formation	7	1.51441	0.000223765
GO:0035217	labial disc development	4	0.504803	0.00025296
GO:0035288	anterior head segmentation	5	0.883405	0.000536315
GO:0035224	genital disc anterior/posterior pattern formation	5	1.00961	0.00128111
GO:0035277	spiracle morphogenesis, open tracheal system	8	2.52401	0.00195593
GO:0007418	ventral midline development	5	1.13581	0.00258311
GO:0035289	posterior head segmentation	5	1.26201	0.00463155
GO:0035290	trunk segmentation	4	1.26201	0.0283109
Cluster 17: rRNA processing
observed gene count: 35
expected gene count: 9.46505465385889
uncorrected p-value: 4.50892007126208e-13
GO ID	term	observed gene count	expected gene count	uncorrected p-value
GO:0006364	rRNA processing	17	3.78602	1.14898e-08
GO:0042254	ribosome biogenesis	12	3.53362	6.79972e-05
GO:0016072	rRNA metabolic process	2	0.252401	0.0159193
GO:0008033	tRNA processing	4	1.64061	0.0709082
GO:0006399	tRNA metabolic process	1	0.126201	0.126201
GO:0006400	tRNA modification	2	0.883405	0.217824
Cluster 18: eggshell chorion assembly
observed gene count: 50
expected gene count: 17.2894998343822
uncorrected p-value: 6.78407441751311e-13
GO ID	term	observed gene count	expected gene count	uncorrected p-value
GO:0007307	eggshell chorion gene amplification	16	2.27161	4.66399e-13
GO:0030707	ovarian follicle cell development	26	6.81484	1.92185e-10
GO:0046843	dorsal appendage formation	10	4.29082	0.00747252
GO:0007304	chorion-containing eggshell formation	7	4.03842	0.100128
GO:0007306	eggshell chorion assembly	2	2.39781	0.711666
Cluster 19: DNA repair
observed gene count: 51
expected gene count: 18.8039085789997
uncorrected p-value: 6.75449680781595e-12
GO ID	term	observed gene count	expected gene count	uncorrected p-value
GO:0006281	DNA repair	30	7.19344	3.87925e-13
GO:0006974	response to DNA damage stimulus	21	11.9891	0.0068231
GO:0006259	DNA metabolic process	3	0.631004	0.0164687
Cluster 20: leg disc development
observed gene count: 31
expected gene count: 8.58164955283206
uncorrected p-value: 2.09026294037735e-11
GO ID	term	observed gene count	expected gene count	uncorrected p-value
GO:0007474	imaginal disc-derived wing vein specification	22	5.42663	1.09949e-09
GO:0007473	wing disc proximal/distal pattern formation	5	0.757204	0.00017113
GO:0007479	leg disc proximal/distal pattern formation	8	2.01921	0.000318507
GO:0035309	wing and notum subfield formation	3	0.757204	0.0298676
GO:0035218	leg disc development	3	1.00961	0.0689234
GO:0009954	proximal/distal pattern formation	1	0.126201	0.126201
GO:0035223	leg disc pattern formation	1	0.252401	0.236482
GO:0007449	proximal/distal pattern formation, imaginal disc	1	0.378602	0.332851
Cluster 21: lateral inhibition
observed gene count: 80
expected gene count: 37.7340178867175
uncorrected p-value: 2.32430204272416e-11
GO ID	term	observed gene count	expected gene count	uncorrected p-value
GO:0046331	lateral inhibition	53	24.6091	3.06665e-08
GO:0016330	second mitotic wave during compound eye morphogenesis	6	1.00961	8.94374e-05
GO:0045468	regulation of R8 cell spacing in compound eye	4	0.631004	0.00113734
GO:0022416	bristle development	15	7.19344	0.00386635
GO:0007460	R8 cell fate commitment	4	0.883405	0.00644767
GO:0048665	neuron fate specification	4	0.883405	0.00644767
GO:0045464	R8 cell fate specification	4	1.26201	0.0283109
GO:0045465	R8 cell differentiation	3	0.757204	0.0298676
GO:0008407	bristle morphogenesis	10	5.30043	0.0329953
Cluster 22: histone modification
observed gene count: 29
expected gene count: 7.69824445180523
uncorrected p-value: 2.56392228666673e-11
GO ID	term	observed gene count	expected gene count	uncorrected p-value
GO:0006325	chromatin organization	17	3.65982	5.64318e-09
GO:0051276	chromosome organization	12	3.65982	0.000102734
GO:0016568	chromatin modification	1	0.252401	0.236482
GO:0016570	histone modification	1	0.504803	0.417063
Cluster 23: cell migration
observed gene count: 51
expected gene count: 19.5611129513084
uncorrected p-value: 3.58975543967447e-11
GO ID	term	observed gene count	expected gene count	uncorrected p-value
GO:0030707	ovarian follicle cell development	26	6.81484	1.92185e-10
GO:0007298	border follicle cell migration	28	11.7367	6.54526e-06
GO:0007297	ovarian follicle cell migration	4	1.38821	0.0401367
GO:0016477	cell migration	4	2.90262	0.329049
Cluster 24: centrosome cycle
observed gene count: 41
expected gene count: 14.2606823451474
uncorrected p-value: 9.81378506029654e-11
GO ID	term	observed gene count	expected gene count	uncorrected p-value
GO:0051297	centrosome organization	22	6.43624	5.92945e-08
GO:0007099	centriole replication	12	2.52401	7.46829e-07
GO:0051298	centrosome duplication	23	8.45545	3.75881e-06
GO:0007098	centrosome cycle	4	1.13581	0.0188391
GO:0031023	microtubule organizing center organization	1	0.378602	0.332851
Cluster 25: histone exchange
observed gene count: 16
expected gene count: 2.77641603179861
uncorrected p-value: 1.37808891798181e-10
GO ID	term	observed gene count	expected gene count	uncorrected p-value
GO:0016573	histone acetylation	12	2.14541	5.29856e-08
GO:0043044	ATP-dependent chromatin remodeling	4	0.504803	0.00025296
GO:0043486	histone exchange	3	0.378602	0.00200719
Cluster 26: neuroblast fate commitment
observed gene count: 18
expected gene count: 3.53362040410732
uncorrected p-value: 2.28714817028146e-10
GO ID	term	observed gene count	expected gene count	uncorrected p-value
GO:0007400	neuroblast fate determination	18	3.40742	9.2635e-11
GO:0014017	neuroblast fate commitment	1	0.126201	0.126201
Cluster 27: spindle checkpoint
observed gene count: 26
expected gene count: 6.94104007949652
uncorrected p-value: 3.20907764855777e-10
GO ID	term	observed gene count	expected gene count	uncorrected p-value
GO:0007088	regulation of mitosis	12	3.02882	9.83479e-06
GO:0007094	mitotic cell cycle spindle assembly checkpoint	6	1.38821	0.00105069
GO:0030071	regulation of mitotic metaphase/anaphase transition	5	1.00961	0.00128111
GO:0007093	mitotic cell cycle checkpoint	4	1.13581	0.0188391
GO:0045841	negative regulation of mitotic metaphase/anaphase transition	1	0.126201	0.126201
GO:0000075	cell cycle checkpoint	2	0.757204	0.169141
GO:0031577	spindle checkpoint	1	0.252401	0.236482
GO:0045786	negative regulation of cell cycle	1	0.378602	0.332851
GO:0045839	negative regulation of mitosis	1	0.378602	0.332851
Cluster 28: stem cell division
observed gene count: 26
expected gene count: 7.31964226565088
uncorrected p-value: 1.36266502183656e-09
GO ID	term	observed gene count	expected gene count	uncorrected p-value
GO:0055059	asymmetric neuroblast division	15	3.78602	7.48759e-07
GO:0007405	neuroblast proliferation	8	2.52401	0.00195593
GO:0048103	somatic stem cell division	5	1.13581	0.00258311
GO:0017145	stem cell division	2	0.631004	0.122716
GO:0055057	neuroblast division	1	0.252401	0.236482
Cluster 29: hemopoiesis
observed gene count: 19
expected gene count: 4.66942696257039
uncorrected p-value: 1.40250412177424e-08
GO ID	term	observed gene count	expected gene count	uncorrected p-value
GO:0048542	lymph gland development	12	2.27161	1.4061e-07
GO:0030097	hemopoiesis	9	2.65022	0.000562142
Cluster 30: spliceosome assembly
observed gene count: 12
expected gene count: 2.0192116594899
uncorrected p-value: 1.76191921027995e-08
GO ID	term	observed gene count	expected gene count	uncorrected p-value
GO:0006376	mRNA splice site selection	7	0.883405	5.04945e-07
GO:0000245	spliceosome assembly	4	0.883405	0.00644767
GO:0022618	ribonucleoprotein complex assembly	1	0.252401	0.236482
Cluster 31: stem cell division
observed gene count: 21
expected gene count: 5.67903279231534
uncorrected p-value: 2.17185524399238e-08
GO ID	term	observed gene count	expected gene count	uncorrected p-value
GO:0008356	asymmetric cell division	13	3.02882	1.27608e-06
GO:0042078	germ-line stem cell division	9	2.65022	0.000562142
GO:0017145	stem cell division	2	0.631004	0.122716
Cluster 32: stem cell maintenance
observed gene count: 22
expected gene count: 6.18383570718781
uncorrected p-value: 2.43110459570283e-08
GO ID	term	observed gene count	expected gene count	uncorrected p-value
GO:0030718	germ-line stem cell maintenance	16	4.66943	3.66465e-06
GO:0045596	negative regulation of cell differentiation	3	0.504803	0.00726987
GO:0048863	stem cell differentiation	3	0.631004	0.0164687
GO:0019827	stem cell maintenance	3	0.883405	0.0474325
Cluster 33: gonad development
observed gene count: 30
expected gene count: 10.3484597548857
uncorrected p-value: 2.51814604646063e-08
GO ID	term	observed gene count	expected gene count	uncorrected p-value
GO:0008406	gonad development	16	4.16462	5.4602e-07
GO:0007280	pole cell migration	10	2.90262	0.000239992
GO:0007506	gonadal mesoderm development	4	1.00961	0.0116142
GO:0008354	germ cell migration	9	4.29082	0.0220155
GO:0007548	sex differentiation	4	2.01921	0.133512
Cluster 34: gastrulation
observed gene count: 33
expected gene count: 12.2414706856575
uncorrected p-value: 4.04050341929923e-08
GO ID	term	observed gene count	expected gene count	uncorrected p-value
GO:0007369	gastrulation	13	3.15502	2.3511e-06
GO:0007498	mesoderm development	22	8.45545	1.37236e-05
GO:0001710	mesodermal cell fate commitment	5	0.757204	0.00017113
GO:0007501	mesodermal cell fate specification	5	1.38821	0.0076156
GO:0007500	mesodermal cell fate determination	3	0.631004	0.0164687
GO:0048332	mesoderm morphogenesis	1	0.126201	0.126201
GO:0001707	mesoderm formation	1	0.252401	0.236482
Cluster 35: tube morphogenesis
observed gene count: 42
expected gene count: 17.9205034779728
uncorrected p-value: 6.27721281737935e-08
GO ID	term	observed gene count	expected gene count	uncorrected p-value
GO:0007428	primary branching, open tracheal system	8	1.89301	0.000179038
GO:0007427	epithelial cell migration, open tracheal system	12	3.91222	0.000219221
GO:0007424	open tracheal system development	27	13.3773	0.000232219
GO:0035153	epithelial cell type specification, open tracheal system	4	0.504803	0.00025296
GO:0035147	branch fusion, open tracheal system	9	2.65022	0.000562142
GO:0008543	fibroblast growth factor receptor signaling pathway	6	1.38821	0.00105069
GO:0001763	morphogenesis of a branching structure	4	0.883405	0.00644767
GO:0060446	branching involved in open tracheal system development	4	1.00961	0.0116142
GO:0048754	branching morphogenesis of a tube	2	0.252401	0.0159193
GO:0035239	tube morphogenesis	1	0.504803	0.417063
Cluster 36: wing disc pattern formation
observed gene count: 32
expected gene count: 12.2414706856575
uncorrected p-value: 1.46164531259521e-07
GO ID	term	observed gene count	expected gene count	uncorrected p-value
GO:0007447	imaginal disc pattern formation	7	1.38821	0.000104665
GO:0035222	wing disc pattern formation	7	1.76681	0.000770029
GO:0048190	wing disc dorsal/ventral pattern formation	13	5.93143	0.00438102
GO:0007450	dorsal/ventral pattern formation, imaginal disc	5	1.26201	0.00463155
GO:0009953	dorsal/ventral pattern formation	8	3.40742	0.0153897
Cluster 37: hindgut morphogenesis
observed gene count: 21
expected gene count: 6.43623716462405
uncorrected p-value: 3.09117830754651e-07
GO ID	term	observed gene count	expected gene count	uncorrected p-value
GO:0007442	hindgut morphogenesis	10	2.39781	3.12866e-05
GO:0007443	Malpighian tubule morphogenesis	12	4.03842	0.000310772
GO:0048546	digestive tract morphogenesis	2	0.252401	0.0159193
GO:0007439	ectodermal gut development	1	0.126201	0.126201
GO:0048567	ectodermal gut morphogenesis	1	0.504803	0.417063
GO:0048619	embryonic hindgut morphogenesis	1	0.631004	0.490649
Cluster 38: cardioblast differentiation
observed gene count: 10
expected gene count: 1.76681020205366
uncorrected p-value: 6.19094250043909e-07
GO ID	term	observed gene count	expected gene count	uncorrected p-value
GO:0035051	cardiac cell differentiation	6	0.883405	2.50556e-05
GO:0010002	cardioblast differentiation	6	1.13581	0.000239512
Cluster 39: gastrulation
observed gene count: 17
expected gene count: 4.66942696257039
uncorrected p-value: 6.36092652258373e-07
GO ID	term	observed gene count	expected gene count	uncorrected p-value
GO:0007369	gastrulation	13	3.15502	2.3511e-06
GO:0007370	ventral furrow formation	7	1.89301	0.00128715
GO:0010004	gastrulation involving germ band extension	3	1.38821	0.152841
Cluster 40: regulation of neurogenesis
observed gene count: 13
expected gene count: 2.90261676051673
uncorrected p-value: 6.61402920235554e-07
GO ID	term	observed gene count	expected gene count	uncorrected p-value
GO:0050767	regulation of neurogenesis	7	1.00961	3.59492e-06
GO:0007406	negative regulation of neuroblast proliferation	4	0.883405	0.00644767
GO:0050768	negative regulation of neurogenesis	2	0.504803	0.0802173
GO:0051960	regulation of nervous system development	1	0.504803	0.417063
GO:0045664	regulation of neuron differentiation	1	0.504803	0.417063
Cluster 41: meiosis I
observed gene count: 18
expected gene count: 5.17422987744286
uncorrected p-value: 6.89534793869661e-07
GO ID	term	observed gene count	expected gene count	uncorrected p-value
GO:0006310	DNA recombination	10	2.14541	8.377e-06
GO:0007131	reciprocal meiotic recombination	8	3.02882	0.0071921
GO:0007127	meiosis I	1	0.378602	0.332851
Cluster 42: G2/M transition of mitotic cell cycle
observed gene count: 12
expected gene count: 2.52401457436237
uncorrected p-value: 7.46829243203816e-07
GO ID	term	observed gene count	expected gene count	uncorrected p-value
GO:0000086	G2/M transition of mitotic cell cycle	6	1.00961	8.94374e-05
GO:0000082	G1/S transition of mitotic cell cycle	8	1.76681	9.39512e-05
Cluster 43: female germ-line cyst encapsulation
observed gene count: 15
expected gene count: 3.78602186154356
uncorrected p-value: 7.48759342359444e-07
GO ID	term	observed gene count	expected gene count	uncorrected p-value
GO:0016333	morphogenesis of follicular epithelium	7	1.26201	4.27367e-05
GO:0030708	germarium-derived female germ-line cyst encapsulation	6	1.26201	0.000534676
GO:0030713	ovarian follicle cell stalk formation	7	2.14541	0.00309422
GO:0048139	female germ-line cyst encapsulation	1	0.126201	0.126201
Cluster 44: basal protein localization
observed gene count: 14
expected gene count: 3.4074196753892
uncorrected p-value: 9.97261570328393e-07
GO ID	term	observed gene count	expected gene count	uncorrected p-value
GO:0045167	asymmetric protein localization involved in cell fate determination	11	1.76681	3.18149e-08
GO:0051294	establishment of spindle orientation	5	0.631004	3.18651e-05
GO:0045175	basal protein localization	5	1.00961	0.00128111
GO:0040001	establishment of mitotic spindle localization	4	1.13581	0.0188391
GO:0030010	establishment of cell polarity	1	0.631004	0.490649
Cluster 45: mitotic cell cycle, embryonic
observed gene count: 13
expected gene count: 3.02881748923485
uncorrected p-value: 1.27607954985009e-06
GO ID	term	observed gene count	expected gene count	uncorrected p-value
GO:0035186	syncytial blastoderm mitotic cell cycle	10	1.89301	1.64606e-06
GO:0045448	mitotic cell cycle, embryonic	3	1.13581	0.0939656
Cluster 46: Bolwig's organ morphogenesis
observed gene count: 12
expected gene count: 2.90261676051673
uncorrected p-value: 5.55543681434564e-06
GO ID	term	observed gene count	expected gene count	uncorrected p-value
GO:0007448	anterior/posterior pattern formation, imaginal disc	6	1.00961	8.94374e-05
GO:0048100	wing disc anterior/posterior pattern formation	7	1.51441	0.000223765
GO:0048099	anterior/posterior lineage restriction, imaginal disc	4	0.504803	0.00025296
GO:0001746	Bolwig's organ morphogenesis	5	1.13581	0.00258311
Cluster 47: endocytosis
observed gene count: 69
expected gene count: 40.7628353759523
uncorrected p-value: 6.24942198845415e-06
GO ID	term	observed gene count	expected gene count	uncorrected p-value
GO:0006911	phagocytosis, engulfment	50	22.5899	2.8746e-08
GO:0006909	phagocytosis	5	2.27161	0.0667701
GO:0006897	endocytosis	7	5.30043	0.274993
GO:0016044	membrane organization	2	1.64061	0.501908
GO:0016192	vesicle-mediated transport	8	10.8533	0.865112
Cluster 48: DNA damage checkpoint
observed gene count: 9
expected gene count: 1.76681020205366
uncorrected p-value: 8.78772896349131e-06
GO ID	term	observed gene count	expected gene count	uncorrected p-value
GO:0000077	DNA damage checkpoint	7	1.38821	0.000104665
GO:0042770	DNA damage response, signal transduction	1	0.126201	0.126201
GO:0000075	cell cycle checkpoint	2	0.757204	0.169141
Cluster 49: cardioblast differentiation
observed gene count: 12
expected gene count: 3.02881748923485
uncorrected p-value: 9.83479407884115e-06
GO ID	term	observed gene count	expected gene count	uncorrected p-value
GO:0010002	cardioblast differentiation	6	1.13581	0.000239512
GO:0035050	embryonic heart tube development	8	2.14541	0.000535259
GO:0042684	cardioblast cell fate commitment	1	0.252401	0.236482
Cluster 50: ommatidial rotation
observed gene count: 27
expected gene count: 11.3580655846307
uncorrected p-value: 1.02371407005383e-05
GO ID	term	observed gene count	expected gene count	uncorrected p-value
GO:0016318	ommatidial rotation	11	3.53362	0.000344332
GO:0001738	morphogenesis of a polarized epithelium	6	2.01921	0.0104074
GO:0042067	establishment of ommatidial polarity	8	3.65982	0.023687
GO:0001736	establishment of planar polarity	8	3.78602	0.0288324
GO:0007163	establishment or maintenance of cell polarity	8	4.03842	0.0413216
Cluster 51: actin filament organization
observed gene count: 30
expected gene count: 13.3772772441206
uncorrected p-value: 1.22585673228284e-05
GO ID	term	observed gene count	expected gene count	uncorrected p-value
GO:0007015	actin filament organization	20	8.70785	0.000234142
GO:0030036	actin cytoskeleton organization	16	6.31004	0.000280805
Cluster 52: torso signaling pathway
observed gene count: 17
expected gene count: 5.67903279231534
uncorrected p-value: 1.62900937658227e-05
GO ID	term	observed gene count	expected gene count	uncorrected p-value
GO:0008293	torso signaling pathway	14	4.29082	2.9218e-05
GO:0007354	zygotic determination of anterior/posterior axis, embryo	4	1.00961	0.0116142
GO:0007362	terminal region determination	8	3.40742	0.0153897
Cluster 53: sensory organ boundary specification
observed gene count: 15
expected gene count: 4.66942696257039
uncorrected p-value: 1.90116589439044e-05
GO ID	term	observed gene count	expected gene count	uncorrected p-value
GO:0007432	salivary gland boundary specification	7	1.64061	0.00043199
GO:0016360	sensory organ precursor cell fate determination	8	2.65022	0.00281365
GO:0008052	sensory organ boundary specification	1	0.883405	0.611139
Cluster 54: induction of apoptosis
observed gene count: 32
expected gene count: 15.2702881748923
uncorrected p-value: 2.89519930116736e-05
GO ID	term	observed gene count	expected gene count	uncorrected p-value
GO:0042981	regulation of apoptosis	9	2.52401	0.000361503
GO:0043066	negative regulation of apoptosis	14	6.56244	0.00413784
GO:0006917	induction of apoptosis	7	2.39781	0.00638405
GO:0043065	positive regulation of apoptosis	3	1.13581	0.0939656
GO:0043068	positive regulation of programmed cell death	1	0.631004	0.490649
GO:0043067	regulation of programmed cell death	1	0.883405	0.611139
GO:0043069	negative regulation of programmed cell death	1	0.883405	0.611139
Cluster 55: zonula adherens assembly
observed gene count: 22
expected gene count: 8.8340510102683
uncorrected p-value: 2.98007410165116e-05
GO ID	term	observed gene count	expected gene count	uncorrected p-value
GO:0008105	asymmetric protein localization	9	2.01921	3.95694e-05
GO:0045196	establishment or maintenance of neuroblast polarity	6	1.00961	8.94374e-05
GO:0045175	basal protein localization	5	1.00961	0.00128111
GO:0016332	establishment or maintenance of polarity of embryonic epithelium	5	1.13581	0.00258311
GO:0045186	zonula adherens assembly	5	1.26201	0.00463155
GO:0007043	cell-cell junction assembly	3	0.757204	0.0298676
GO:0045197	establishment or maintenance of epithelial cell apical/basal polarity	5	2.14541	0.0535939
GO:0035088	establishment or maintenance of apical/basal cell polarity	4	1.51441	0.054348
GO:0045176	apical protein localization	3	1.13581	0.0939656
GO:0019991	septate junction assembly	5	3.40742	0.249057
Cluster 56: meiosis
observed gene count: 22
expected gene count: 8.96025173898642
uncorrected p-value: 3.80890522626599e-05
GO ID	term	observed gene count	expected gene count	uncorrected p-value
GO:0016321	female meiosis chromosome segregation	10	3.91222	0.00359814
GO:0007143	female meiosis	8	3.15502	0.00942806
GO:0007126	meiosis	5	2.65022	0.115873
GO:0051321	meiotic cell cycle	1	0.126201	0.126201
GO:0045132	meiotic chromosome segregation	1	0.504803	0.417063
Cluster 57: RNA methylation
observed gene count: 7
expected gene count: 1.26200728718119
uncorrected p-value: 4.27367023874413e-05
GO ID	term	observed gene count	expected gene count	uncorrected p-value
GO:0001510	RNA methylation	6	1.00961	8.94374e-05
GO:0031167	rRNA methylation	1	0.126201	0.126201
Cluster 58: regulation of protein localization
observed gene count: 14
expected gene count: 4.41702550513415
uncorrected p-value: 4.30686603760907e-05
GO ID	term	observed gene count	expected gene count	uncorrected p-value
GO:0051533	positive regulation of NFAT protein import into nucleus	7	2.01921	0.00204053
GO:0032880	regulation of protein localization	3	0.883405	0.0474325
GO:0046822	regulation of nucleocytoplasmic transport	1	0.126201	0.126201
GO:0033157	regulation of intracellular protein transport	1	0.126201	0.126201
GO:0042306	regulation of protein import into nucleus	2	0.757204	0.169141
GO:0042993	positive regulation of transcription factor import into nucleus	1	0.252401	0.236482
Cluster 59: retinal cell programmed cell death
observed gene count: 11
expected gene count: 3.02881748923485
uncorrected p-value: 6.4803557004539e-05
GO ID	term	observed gene count	expected gene count	uncorrected p-value
GO:0030720	oocyte localization during germarium-derived egg chamber formation	7	1.64061	0.00043199
GO:0046667	compound eye retinal cell programmed cell death	5	1.26201	0.00463155
GO:0010623	developmental programmed cell death	2	0.378602	0.0437436
GO:0046666	retinal cell programmed cell death	2	0.504803	0.0802173
Cluster 60: mRNA polyadenylation
observed gene count: 11
expected gene count: 3.02881748923485
uncorrected p-value: 6.4803557004539e-05
GO ID	term	observed gene count	expected gene count	uncorrected p-value
GO:0006398	histone mRNA 3'-end processing	7	1.13581	1.43999e-05
GO:0006378	mRNA polyadenylation	7	2.27161	0.00451767
GO:0008334	histone mRNA metabolic process	1	0.252401	0.236482
Cluster 61: RNA interference
observed gene count: 18
expected gene count: 6.94104007949652
uncorrected p-value: 8.58217149257362e-05
GO ID	term	observed gene count	expected gene count	uncorrected p-value
GO:0000184	nuclear-transcribed mRNA catabolic process, nonsense-mediated decay	7	1.51441	0.000223765
GO:0035195	gene silencing by miRNA	9	2.77642	0.000845485
GO:0000956	nuclear-transcribed mRNA catabolic process	3	0.378602	0.00200719
GO:0016246	RNA interference	8	3.15502	0.00942806
GO:0035194	posttranscriptional gene silencing by RNA	1	0.252401	0.236482
GO:0006401	RNA catabolic process	1	0.252401	0.236482
GO:0035196	gene silencing by miRNA, production of miRNAs	1	0.252401	0.236482
GO:0031053	primary microRNA processing	1	0.252401	0.236482
GO:0030422	RNA interference, production of siRNA	2	1.00961	0.267458
GO:0031047	gene silencing by RNA	1	0.378602	0.332851
Cluster 62: hemocyte migration
observed gene count: 14
expected gene count: 4.66942696257039
uncorrected p-value: 8.87088886178196e-05
GO ID	term	observed gene count	expected gene count	uncorrected p-value
GO:0035167	larval lymph gland hemopoiesis	4	1.00961	0.0116142
GO:0035162	embryonic hemopoiesis	3	0.631004	0.0164687
GO:0042688	crystal cell differentiation	3	0.883405	0.0474325
GO:0042386	hemocyte differentiation	3	0.883405	0.0474325
GO:0035099	hemocyte migration	4	2.27161	0.184198
GO:0042689	regulation of crystal cell differentiation	1	0.252401	0.236482
GO:0035168	larval lymph gland hemocyte differentiation	1	0.252401	0.236482
Cluster 63: double-strand break repair
observed gene count: 11
expected gene count: 3.15501821795296
uncorrected p-value: 0.00010256556578105
GO ID	term	observed gene count	expected gene count	uncorrected p-value
GO:0045003	double-strand break repair via synthesis-dependent strand annealing	4	0.631004	0.00113734
GO:0006302	double-strand break repair	5	1.38821	0.0076156
GO:0000724	double-strand break repair via homologous recombination	4	1.76681	0.089723
Cluster 64: leg disc development
observed gene count: 23
expected gene count: 10.2222590261676
uncorrected p-value: 0.000116217805038266
GO ID	term	observed gene count	expected gene count	uncorrected p-value
GO:0007480	imaginal disc-derived leg morphogenesis	16	6.94104	0.000917839
GO:0008587	imaginal disc-derived wing margin morphogenesis	10	3.40742	0.00109898
GO:0007478	leg disc morphogenesis	2	0.252401	0.0159193
GO:0035218	leg disc development	3	1.00961	0.0689234
Cluster 65: embryonic hemopoiesis
observed gene count: 10
expected gene count: 2.77641603179861
uncorrected p-value: 0.000152869028693407
GO ID	term	observed gene count	expected gene count	uncorrected p-value
GO:0042690	negative regulation of crystal cell differentiation	3	0.504803	0.00726987
GO:0035162	embryonic hemopoiesis	3	0.631004	0.0164687
GO:0045610	regulation of hemocyte differentiation	5	1.64061	0.0170876
GO:0045611	negative regulation of hemocyte differentiation	1	0.126201	0.126201
GO:0042689	regulation of crystal cell differentiation	1	0.252401	0.236482
Cluster 66: BMP signaling pathway
observed gene count: 10
expected gene count: 2.90261676051673
uncorrected p-value: 0.000239991711793263
GO ID	term	observed gene count	expected gene count	uncorrected p-value
GO:0007179	transforming growth factor beta receptor signaling pathway	9	2.65022	0.000562142
GO:0030509	BMP signaling pathway	5	1.00961	0.00128111
Cluster 67: negative regulation of transcription from RNA polymerase II promoter, mitotic
observed gene count: 4
expected gene count: 0.504802914872474
uncorrected p-value: 0.000252959732517032
GO ID	term	observed gene count	expected gene count	uncorrected p-value
GO:0007070	negative regulation of transcription from RNA polymerase II promoter, mitotic	4	0.504803	0.00025296
Cluster 68: axis specification
observed gene count: 18
expected gene count: 7.57204372308712
uncorrected p-value: 0.000296392389771458
GO ID	term	observed gene count	expected gene count	uncorrected p-value
GO:0009953	dorsal/ventral pattern formation	8	3.40742	0.0153897
GO:0009950	dorsal/ventral axis specification	8	3.78602	0.0288324
GO:0009798	axis specification	3	1.00961	0.0689234
Cluster 69: growth
observed gene count: 14
expected gene count: 5.30043060616098
uncorrected p-value: 0.000416555873916206
GO ID	term	observed gene count	expected gene count	uncorrected p-value
GO:0007446	imaginal disc growth	9	2.14541	7.46609e-05
GO:0040007	growth	4	2.65022	0.26916
GO:0035265	organ growth	1	0.378602	0.332851
GO:0048589	developmental growth	1	0.504803	0.417063
Cluster 70: regulation of DNA binding
observed gene count: 10
expected gene count: 3.15501821795296
uncorrected p-value: 0.000540166469597504
GO ID	term	observed gene count	expected gene count	uncorrected p-value
GO:0051090	regulation of transcription factor activity	7	2.39781	0.00638405
GO:0051101	regulation of DNA binding	2	0.378602	0.0437436
GO:0043388	positive regulation of DNA binding	1	0.378602	0.332851
Cluster 71: salivary gland development
observed gene count: 18
expected gene count: 7.95064590924147
uncorrected p-value: 0.000572303943372105
GO ID	term	observed gene count	expected gene count	uncorrected p-value
GO:0007431	salivary gland development	9	3.15502	0.00244068
GO:0007435	salivary gland morphogenesis	11	6.31004	0.0443626
Cluster 72: regulation of cell fate specification
observed gene count: 7
expected gene count: 1.76681020205366
uncorrected p-value: 0.000770028718047586
GO ID	term	observed gene count	expected gene count	uncorrected p-value
GO:0009996	negative regulation of cell fate specification	4	0.631004	0.00113734
GO:0042659	regulation of cell fate specification	3	1.13581	0.0939656
Cluster 73: regulation of growth
observed gene count: 22
expected gene count: 10.8532626697582
uncorrected p-value: 0.000797421385406602
GO ID	term	observed gene count	expected gene count	uncorrected p-value
GO:0030307	positive regulation of cell growth	6	2.39781	0.0253134
GO:0040014	regulation of multicellular organism growth	5	1.89301	0.0321721
GO:0045927	positive regulation of growth	4	1.38821	0.0401367
GO:0001558	regulation of cell growth	5	2.01921	0.0420652
GO:0040008	regulation of growth	5	2.52401	0.0979668
GO:0008361	regulation of cell size	4	1.89301	0.110651
GO:0040018	positive regulation of multicellular organism growth	5	2.77642	0.135204
GO:0045793	positive regulation of cell size	3	2.65022	0.505082
Cluster 74: sex determination
observed gene count: 9
expected gene count: 2.77641603179861
uncorrected p-value: 0.000845485169180814
GO ID	term	observed gene count	expected gene count	uncorrected p-value
GO:0007540	sex determination, establishment of X:A ratio	4	0.631004	0.00113734
GO:0007530	sex determination	7	2.27161	0.00451767
GO:0007541	sex determination, primary response to X:A ratio	3	0.631004	0.0164687
GO:0007539	primary sex determination, soma	2	0.378602	0.0437436
GO:0019101	female somatic sex determination	2	0.631004	0.122716
GO:0030237	female sex determination	1	0.378602	0.332851
GO:0018993	somatic sex determination	1	0.504803	0.417063
Cluster 75: negative regulation of RNA splicing
observed gene count: 4
expected gene count: 0.631003643590593
uncorrected p-value: 0.00113733820230688
GO ID	term	observed gene count	expected gene count	uncorrected p-value
GO:0048025	negative regulation of nuclear mRNA splicing, via spliceosome	3	0.378602	0.00200719
GO:0033119	negative regulation of RNA splicing	1	0.252401	0.236482
Cluster 76: positive regulation of cell cycle
observed gene count: 8
expected gene count: 2.39781384564425
uncorrected p-value: 0.00131816121074175
GO ID	term	observed gene count	expected gene count	uncorrected p-value
GO:0045931	positive regulation of mitotic cell cycle	5	0.883405	0.000536315
GO:0045930	negative regulation of mitotic cell cycle	2	0.631004	0.122716
GO:0045787	positive regulation of cell cycle	2	1.00961	0.267458
Cluster 77: oogenesis
observed gene count: 79
expected gene count: 57.0427293805896
uncorrected p-value: 0.00152212626525702
GO ID	term	observed gene count	expected gene count	uncorrected p-value
GO:0048477	oogenesis	62	25.1139	4.1703e-12
GO:0030707	ovarian follicle cell development	26	6.81484	1.92185e-10
GO:0032504	multicellular organism reproduction	3	27.5118	1
Cluster 78: dosage compensation
observed gene count: 6
expected gene count: 1.51440874461742
uncorrected p-value: 0.00187761326217983
GO ID	term	observed gene count	expected gene count	uncorrected p-value
GO:0007549	dosage compensation	6	1.38821	0.00105069
GO:0009047	dosage compensation, by hyperactivation of X chromosome	4	1.00961	0.0116142
GO:0016457	dosage compensation complex assembly during dosage compensation by hyperactivation of X chromosome	3	0.631004	0.0164687
Cluster 79: telomere maintenance
observed gene count: 6
expected gene count: 1.51440874461742
uncorrected p-value: 0.00187761326217983
GO ID	term	observed gene count	expected gene count	uncorrected p-value
GO:0000723	telomere maintenance	6	1.51441	0.00187761
Cluster 80: positive regulation of neuron differentiation
observed gene count: 10
expected gene count: 3.65982113282544
uncorrected p-value: 0.00205836939870813
GO ID	term	observed gene count	expected gene count	uncorrected p-value
GO:0045678	positive regulation of R7 cell differentiation	4	0.631004	0.00113734
GO:0046580	negative regulation of Ras protein signal transduction	5	2.14541	0.0535939
GO:0046534	positive regulation of photoreceptor cell differentiation	2	0.504803	0.0802173
GO:0046532	regulation of photoreceptor cell differentiation	1	0.126201	0.126201
GO:0045666	positive regulation of neuron differentiation	1	0.126201	0.126201
Cluster 81: homeostatic process
observed gene count: 13
expected gene count: 5.67903279231534
uncorrected p-value: 0.00289238578975695
GO ID	term	observed gene count	expected gene count	uncorrected p-value
GO:0007390	germ-band shortening	7	2.39781	0.00638405
GO:0046665	amnioserosa maintenance	3	0.631004	0.0164687
GO:0035160	maintenance of epithelial integrity, open tracheal system	4	1.51441	0.054348
GO:0042592	homeostatic process	1	0.126201	0.126201
GO:0010669	epithelial structure maintenance	1	0.252401	0.236482
GO:0035152	regulation of tube architecture, open tracheal system	1	1.64061	0.827007
Cluster 82: regulation of compound eye pigmentation
observed gene count: 4
expected gene count: 0.757204372308712
uncorrected p-value: 0.00306975497468235
GO ID	term	observed gene count	expected gene count	uncorrected p-value
GO:0048076	regulation of compound eye pigmentation	4	0.631004	0.00113734
Cluster 83: mesoderm migration
observed gene count: 5
expected gene count: 1.26200728718119
uncorrected p-value: 0.00463154764470334
GO ID	term	observed gene count	expected gene count	uncorrected p-value
GO:0007509	mesoderm migration	5	1.00961	0.00128111
GO:0008078	mesodermal cell migration	3	0.631004	0.0164687
Cluster 84: protein transport
observed gene count: 43
expected gene count: 29.1523683338854
uncorrected p-value: 0.00548508131513642
GO ID	term	observed gene count	expected gene count	uncorrected p-value
GO:0006913	nucleocytoplasmic transport	5	1.00961	0.00128111
GO:0006606	protein import into nucleus	9	3.02882	0.00175649
GO:0034613	cellular protein localization	2	0.252401	0.0159193
GO:0008104	protein localization	11	5.67903	0.0216075
GO:0045184	establishment of protein localization	3	0.757204	0.0298676
GO:0034504	protein localization in nucleus	1	0.126201	0.126201
GO:0006886	intracellular protein transport	10	9.46505	0.477778
GO:0015031	protein transport	4	8.45545	0.976341
Cluster 85: regulation of cell growth
observed gene count: 12
expected gene count: 5.55283206359722
uncorrected p-value: 0.00686845013698693
GO ID	term	observed gene count	expected gene count	uncorrected p-value
GO:0001558	regulation of cell growth	5	2.01921	0.0420652
GO:0045792	negative regulation of cell size	5	2.14541	0.0535939
GO:0030308	negative regulation of cell growth	2	1.00961	0.267458
GO:0045926	negative regulation of growth	2	1.26201	0.365758
Cluster 86: regulation of DNA replication
observed gene count: 5
expected gene count: 1.3882080158993
uncorrected p-value: 0.00761559642250233
GO ID	term	observed gene count	expected gene count	uncorrected p-value
GO:0006275	regulation of DNA replication	3	0.504803	0.00726987
GO:0008156	negative regulation of DNA replication	2	0.883405	0.217824
Cluster 87: notum development
observed gene count: 5
expected gene count: 1.3882080158993
uncorrected p-value: 0.00761559642250233
GO ID	term	observed gene count	expected gene count	uncorrected p-value
GO:0007482	haltere development	5	1.13581	0.00258311
GO:0007477	notum development	2	0.504803	0.0802173
Cluster 88: methylation
observed gene count: 12
expected gene count: 5.80523352103345
uncorrected p-value: 0.00998720982517091
GO ID	term	observed gene count	expected gene count	uncorrected p-value
GO:0016571	histone methylation	8	1.64061	4.52864e-05
GO:0034968	histone lysine methylation	1	0.126201	0.126201
GO:0032259	methylation	2	1.13581	0.317027
GO:0006479	protein amino acid methylation	1	0.883405	0.611139
Cluster 89: compound eye cone cell fate commitment
observed gene count: 6
expected gene count: 2.0192116594899
uncorrected p-value: 0.0104073570212647
GO ID	term	observed gene count	expected gene count	uncorrected p-value
GO:0045468	regulation of R8 cell spacing in compound eye	4	0.631004	0.00113734
GO:0042676	compound eye cone cell fate commitment	3	0.757204	0.0298676
GO:0042675	compound eye cone cell differentiation	2	1.00961	0.267458
Cluster 90: regulation of actin filament length
observed gene count: 11
expected gene count: 5.17422987744286
uncorrected p-value: 0.0107661155630445
GO ID	term	observed gene count	expected gene count	uncorrected p-value
GO:0007300	ovarian nurse cell to oocyte transport	5	1.64061	0.0170876
GO:0007303	cytoplasmic transport, nurse cell to oocyte	5	1.89301	0.0321721
GO:0032956	regulation of actin cytoskeleton organization	3	0.883405	0.0474325
GO:0030832	regulation of actin filament length	1	0.126201	0.126201
GO:0032970	regulation of actin filament-based process	1	0.252401	0.236482
GO:0051493	regulation of cytoskeleton organization	1	0.631004	0.490649
GO:0008064	regulation of actin polymerization or depolymerization	1	1.00961	0.660236
Cluster 91: muscle fiber development
observed gene count: 4
expected gene count: 1.00960582974495
uncorrected p-value: 0.0116142364006048
GO ID	term	observed gene count	expected gene count	uncorrected p-value
GO:0048747	muscle fiber development	4	1.00961	0.0116142
Cluster 92: oocyte fate determination
observed gene count: 9
expected gene count: 3.91222259026168
uncorrected p-value: 0.0119669551222707
GO ID	term	observed gene count	expected gene count	uncorrected p-value
GO:0007294	germarium-derived oocyte fate determination	8	3.53362	0.0192214
GO:0030706	germarium-derived oocyte differentiation	1	0.378602	0.332851
GO:0030716	oocyte fate determination	1	0.378602	0.332851
Cluster 93: sulfur metabolic process
observed gene count: 10
expected gene count: 4.66942696257039
uncorrected p-value: 0.0139687907251822
GO ID	term	observed gene count	expected gene count	uncorrected p-value
GO:0008101	decapentaplegic receptor signaling pathway	6	1.38821	0.00105069
GO:0006024	glycosaminoglycan biosynthetic process	4	0.883405	0.00644767
GO:0015014	heparan sulfate proteoglycan biosynthetic process, polysaccharide chain biosynthetic process	3	0.504803	0.00726987
GO:0015012	heparan sulfate proteoglycan biosynthetic process	4	1.51441	0.054348
GO:0006044	N-acetylglucosamine metabolic process	3	1.00961	0.0689234
GO:0030210	heparin biosynthetic process	1	0.126201	0.126201
GO:0006029	proteoglycan metabolic process	1	0.126201	0.126201
GO:0006790	sulfur metabolic process	1	0.252401	0.236482
Cluster 94: actomyosin structure organization
observed gene count: 6
expected gene count: 2.14541238820802
uncorrected p-value: 0.014396339823467
GO ID	term	observed gene count	expected gene count	uncorrected p-value
GO:0000915	cytokinesis, contractile ring formation	5	1.89301	0.0321721
GO:0031032	actomyosin structure organization	1	0.252401	0.236482
Cluster 95: phosphorylation
observed gene count: 45
expected gene count: 32.6859887379927
uncorrected p-value: 0.0156550416454019
GO ID	term	observed gene count	expected gene count	uncorrected p-value
GO:0016310	phosphorylation	7	3.28122	0.0379224
GO:0006468	protein amino acid phosphorylation	38	29.4048	0.0574433
Cluster 96: DNA duplex unwinding
observed gene count: 3
expected gene count: 0.631003643590593
uncorrected p-value: 0.0164686573900807
GO ID	term	observed gene count	expected gene count	uncorrected p-value
GO:0006268	DNA unwinding during replication	2	0.252401	0.0159193
GO:0032508	DNA duplex unwinding	1	0.378602	0.332851
Cluster 97: regulation of retinal cell programmed cell death
observed gene count: 5
expected gene count: 1.76681020205366
uncorrected p-value: 0.0238713412550154
GO ID	term	observed gene count	expected gene count	uncorrected p-value
GO:0046673	negative regulation of compound eye retinal cell programmed cell death	3	1.00961	0.0689234
GO:0046669	regulation of compound eye retinal cell programmed cell death	1	0.252401	0.236482
GO:0046668	regulation of retinal cell programmed cell death	1	0.504803	0.417063
Cluster 98: midgut development
observed gene count: 12
expected gene count: 6.94104007949652
uncorrected p-value: 0.0389132823121739
GO ID	term	observed gene count	expected gene count	uncorrected p-value
GO:0007494	midgut development	11	3.78602	0.000688996
GO:0006697	ecdysone biosynthetic process	4	1.13581	0.0188391
GO:0008205	ecdysone metabolic process	1	0.378602	0.332851
Cluster 99: positive regulation of growth
observed gene count: 4
expected gene count: 1.3882080158993
uncorrected p-value: 0.0401367274025522
GO ID	term	observed gene count	expected gene count	uncorrected p-value
GO:0045927	positive regulation of growth	4	1.38821	0.0401367
Cluster 100: protein polymerization
observed gene count: 6
expected gene count: 2.65021530308049
uncorrected p-value: 0.040667331671799
GO ID	term	observed gene count	expected gene count	uncorrected p-value
GO:0051258	protein polymerization	4	1.64061	0.0709082
GO:0030041	actin filament polymerization	2	0.631004	0.122716
Cluster 101: cell adhesion
observed gene count: 24
expected gene count: 16.7846969195098
uncorrected p-value: 0.0440164081328851
GO ID	term	observed gene count	expected gene count	uncorrected p-value
GO:0016337	cell-cell adhesion	7	2.65022	0.0117458
GO:0007155	cell adhesion	19	15.0179	0.166315
Cluster 102: histolysis
observed gene count: 22
expected gene count: 15.3964889036105
uncorrected p-value: 0.0524301967393231
GO ID	term	observed gene count	expected gene count	uncorrected p-value
GO:0007435	salivary gland morphogenesis	11	6.31004	0.0443626
GO:0035070	salivary gland histolysis	3	1.00961	0.0689234
GO:0007559	histolysis	1	0.252401	0.236482
GO:0048102	autophagic cell death	7	7.19344	0.590764
GO:0035071	salivary gland cell autophagic cell death	8	8.32925	0.604425
Cluster 103: protein amino acid N-linked glycosylation
observed gene count: 4
expected gene count: 1.51440874461742
uncorrected p-value: 0.0543480131924619
GO ID	term	observed gene count	expected gene count	uncorrected p-value
GO:0018279	protein amino acid N-linked glycosylation via asparagine	2	0.378602	0.0437436
GO:0006487	protein amino acid N-linked glycosylation	3	1.38821	0.152841
Cluster 104: innate immune response
observed gene count: 12
expected gene count: 7.31964226565088
uncorrected p-value: 0.0556977422412096
GO ID	term	observed gene count	expected gene count	uncorrected p-value
GO:0002805	regulation of antimicrobial peptide biosynthetic process	6	1.26201	0.000534676
GO:0006963	positive regulation of antibacterial peptide biosynthetic process	4	1.89301	0.110651
GO:0002807	positive regulation of antimicrobial peptide biosynthetic process	1	0.126201	0.126201
GO:0045087	innate immune response	3	4.92183	0.8857
Cluster 105: amnioserosa formation
observed gene count: 8
expected gene count: 4.29082477641603
uncorrected p-value: 0.0569517603162664
GO ID	term	observed gene count	expected gene count	uncorrected p-value
GO:0007354	zygotic determination of anterior/posterior axis, embryo	4	1.00961	0.0116142
GO:0007378	amnioserosa formation	3	0.757204	0.0298676
GO:0007313	maternal specification of dorsal/ventral axis, oocyte, soma encoded	3	0.757204	0.0298676
GO:0007310	oocyte dorsal/ventral axis specification	3	2.65022	0.505082
Cluster 106: cell growth
observed gene count: 12
expected gene count: 7.445842994369
uncorrected p-value: 0.062229322574422
GO ID	term	observed gene count	expected gene count	uncorrected p-value
GO:0001558	regulation of cell growth	5	2.01921	0.0420652
GO:0008361	regulation of cell size	4	1.89301	0.110651
GO:0048588	developmental cell growth	1	0.126201	0.126201
GO:0016049	cell growth	3	1.76681	0.255658
GO:0048675	axon extension	2	2.52401	0.738365
Cluster 107: epidermis development
observed gene count: 11
expected gene count: 6.68863862206029
uncorrected p-value: 0.0639518228899647
GO ID	term	observed gene count	expected gene count	uncorrected p-value
GO:0008544	epidermis development	6	1.76681	0.00487674
GO:0001737	establishment of imaginal disc-derived wing hair orientation	6	3.15502	0.0860614
GO:0035317	imaginal disc-derived wing hair organization	1	2.27161	0.911941
Cluster 108: protein amino acid glycosylation
observed gene count: 8
expected gene count: 4.41702550513415
uncorrected p-value: 0.0659994277683696
GO ID	term	observed gene count	expected gene count	uncorrected p-value
GO:0006486	protein amino acid glycosylation	8	4.03842	0.0413216
Cluster 109: regulation of JNK cascade
observed gene count: 6
expected gene count: 3.02881748923485
uncorrected p-value: 0.0728422630289138
GO ID	term	observed gene count	expected gene count	uncorrected p-value
GO:0046328	regulation of JNK cascade	3	1.13581	0.0939656
GO:0046330	positive regulation of JNK cascade	3	1.64061	0.220101
Cluster 110: response to insulin stimulus
observed gene count: 6
expected gene count: 3.02881748923485
uncorrected p-value: 0.0728422630289138
GO ID	term	observed gene count	expected gene count	uncorrected p-value
GO:0008286	insulin receptor signaling pathway	5	2.65022	0.115873
GO:0032868	response to insulin stimulus	1	0.126201	0.126201
Cluster 111: behavioral response to ethanol
observed gene count: 13
expected gene count: 8.45544882411395
uncorrected p-value: 0.0736998157463718
GO ID	term	observed gene count	expected gene count	uncorrected p-value
GO:0035225	determination of genital disc primordium	7	1.26201	4.27367e-05
GO:0007421	stomatogastric nervous system development	3	0.378602	0.00200719
GO:0046845	branched duct epithelial cell fate determination, open tracheal system	5	1.13581	0.00258311
GO:0048149	behavioral response to ethanol	7	6.05763	0.40334
Cluster 112: regulation of ARF GTPase activity
observed gene count: 11
expected gene count: 6.94104007949652
uncorrected p-value: 0.0797219045123266
GO ID	term	observed gene count	expected gene count	uncorrected p-value
GO:0032312	regulation of ARF GTPase activity	5	1.00961	0.00128111
GO:0046578	regulation of Ras protein signal transduction	2	0.757204	0.169141
GO:0032012	regulation of ARF protein signal transduction	1	0.757204	0.554951
GO:0032313	regulation of Rab GTPase activity	3	3.28122	0.654514
Cluster 113: pigment metabolic process
observed gene count: 2
expected gene count: 0.504802914872474
uncorrected p-value: 0.0802172976785813
GO ID	term	observed gene count	expected gene count	uncorrected p-value
GO:0042440	pigment metabolic process	2	0.504803	0.0802173
Cluster 114: response to ecdysone
observed gene count: 5
expected gene count: 2.39781384564425
uncorrected p-value: 0.0815760789096594
GO ID	term	observed gene count	expected gene count	uncorrected p-value
GO:0035076	ecdysone receptor-mediated signaling pathway	3	1.00961	0.0689234
GO:0035075	response to ecdysone	2	1.51441	0.458553
Cluster 115: regulation of translation
observed gene count: 4
expected gene count: 1.76681020205366
uncorrected p-value: 0.0897229677634252
GO ID	term	observed gene count	expected gene count	uncorrected p-value
GO:0006417	regulation of translation	4	1.64061	0.0709082
Cluster 116: apoptosis
observed gene count: 11
expected gene count: 7.19344153693276
uncorrected p-value: 0.0977190304573025
GO ID	term	observed gene count	expected gene count	uncorrected p-value
GO:0006915	apoptosis	9	5.55283	0.0953333
GO:0012501	programmed cell death	3	1.89301	0.29191
GO:0008219	cell death	1	1.38821	0.773379
Cluster 117: regulation of axonogenesis
observed gene count: 5
expected gene count: 2.52401457436237
uncorrected p-value: 0.0979667596966558
GO ID	term	observed gene count	expected gene count	uncorrected p-value
GO:0050770	regulation of axonogenesis	4	2.01921	0.133512
GO:0045664	regulation of neuron differentiation	1	0.504803	0.417063
Cluster 118: maintenance of protein location
observed gene count: 6
expected gene count: 3.28121894667108
uncorrected p-value: 0.100503092956056
GO ID	term	observed gene count	expected gene count	uncorrected p-value
GO:0032507	maintenance of protein location in cell	2	0.631004	0.122716
GO:0007016	cytoskeletal anchoring at plasma membrane	3	2.14541	0.364969
GO:0045185	maintenance of protein location	1	0.504803	0.417063
Cluster 119: immune response
observed gene count: 17
expected gene count: 12.6200728718119
uncorrected p-value: 0.122567804788883
GO ID	term	observed gene count	expected gene count	uncorrected p-value
GO:0019730	antimicrobial humoral response	13	5.17423	0.00113162
GO:0006959	humoral immune response	2	2.65022	0.762921
GO:0006955	immune response	5	6.31004	0.773356
Cluster 120: transcription termination
observed gene count: 1
expected gene count: 0.126200728718119
uncorrected p-value: 0.126200728718119
GO ID	term	observed gene count	expected gene count	uncorrected p-value
GO:0006353	transcription termination	1	0.126201	0.126201
Cluster 121: neuron recognition
observed gene count: 7
expected gene count: 4.29082477641603
uncorrected p-value: 0.128746765319494
GO ID	term	observed gene count	expected gene count	uncorrected p-value
GO:0016199	axon midline choice point recognition	6	3.15502	0.0860614
GO:0008038	neuron recognition	2	0.883405	0.217824
Cluster 122: exocytosis
observed gene count: 5
expected gene count: 2.77641603179861
uncorrected p-value: 0.135204076175047
GO ID	term	observed gene count	expected gene count	uncorrected p-value
GO:0006904	vesicle docking during exocytosis	2	0.883405	0.217824
GO:0006887	exocytosis	3	2.01921	0.328464
Cluster 123: memory
observed gene count: 15
expected gene count: 11.1056641271944
uncorrected p-value: 0.138200587763347
GO ID	term	observed gene count	expected gene count	uncorrected p-value
GO:0007616	long-term memory	11	6.56244	0.0568898
GO:0007611	learning or memory	6	4.92183	0.369049
GO:0007613	memory	2	2.27161	0.682719
Cluster 124: synaptogenesis
observed gene count: 7
expected gene count: 4.41702550513415
uncorrected p-value: 0.144433599707275
GO ID	term	observed gene count	expected gene count	uncorrected p-value
GO:0050808	synapse organization	4	1.51441	0.054348
GO:0007416	synaptogenesis	3	3.15502	0.627405
Cluster 125: positive regulation of translation
observed gene count: 3
expected gene count: 1.3882080158993
uncorrected p-value: 0.152840741521899
GO ID	term	observed gene count	expected gene count	uncorrected p-value
GO:0045727	positive regulation of translation	3	1.26201	0.122103
Cluster 126: muscle tissue development
observed gene count: 4
expected gene count: 2.14541238820802
uncorrected p-value: 0.158102638964333
GO ID	term	observed gene count	expected gene count	uncorrected p-value
GO:0060537	muscle tissue development	2	0.504803	0.0802173
GO:0007519	skeletal muscle tissue development	3	1.76681	0.255658
Cluster 127: regulation of photoreceptor cell differentiation
observed gene count: 2
expected gene count: 0.757204372308712
uncorrected p-value: 0.169140806903633
GO ID	term	observed gene count	expected gene count	uncorrected p-value
GO:0045314	regulation of compound eye photoreceptor development	2	0.631004	0.122716
GO:0046532	regulation of photoreceptor cell differentiation	1	0.126201	0.126201
Cluster 128: myoblast fusion
observed gene count: 6
expected gene count: 3.78602186154356
uncorrected p-value: 0.169557562303371
GO ID	term	observed gene count	expected gene count	uncorrected p-value
GO:0007520	myoblast fusion	6	3.78602	0.169558
Cluster 129: protein ubiquitination
observed gene count: 7
expected gene count: 4.66942696257039
uncorrected p-value: 0.178333020456632
GO ID	term	observed gene count	expected gene count	uncorrected p-value
GO:0016567	protein ubiquitination	7	4.66943	0.178333
Cluster 130: protein processing
observed gene count: 4
expected gene count: 2.27161311692613
uncorrected p-value: 0.184197650746404
GO ID	term	observed gene count	expected gene count	uncorrected p-value
GO:0016485	protein processing	4	2.27161	0.184198
Cluster 131: visual behavior
observed gene count: 7
expected gene count: 4.79562769128851
uncorrected p-value: 0.196434117686382
GO ID	term	observed gene count	expected gene count	uncorrected p-value
GO:0009314	response to radiation	2	0.631004	0.122716
GO:0007632	visual behavior	3	2.01921	0.328464
GO:0009416	response to light stimulus	2	2.14541	0.65143
Cluster 132: startle response
observed gene count: 4
expected gene count: 2.39781384564425
uncorrected p-value: 0.211563403236203
GO ID	term	observed gene count	expected gene count	uncorrected p-value
GO:0001964	startle response	4	1.76681	0.089723
GO:0048854	brain morphogenesis	4	2.01921	0.133512
GO:0031987	locomotion involved in locomotory behavior	4	2.01921	0.133512
Cluster 133: oocyte microtubule cytoskeleton organization
observed gene count: 7
expected gene count: 4.92182842000662
uncorrected p-value: 0.215219626214306
GO ID	term	observed gene count	expected gene count	uncorrected p-value
GO:0016325	oocyte microtubule cytoskeleton organization	3	1.76681	0.255658
GO:0008103	oocyte microtubule cytoskeleton polarization	4	2.65022	0.26916
GO:0030951	establishment or maintenance of microtubule cytoskeleton polarity	1	0.757204	0.554951
Cluster 134: regulation of histone acetylation
observed gene count: 1
expected gene count: 0.252401457436237
uncorrected p-value: 0.236482139331077
GO ID	term	observed gene count	expected gene count	uncorrected p-value
GO:0035065	regulation of histone acetylation	1	0.252401	0.236482
Cluster 135: DNA methylation
observed gene count: 1
expected gene count: 0.252401457436237
uncorrected p-value: 0.236482139331077
GO ID	term	observed gene count	expected gene count	uncorrected p-value
GO:0006306	DNA methylation	1	0.252401	0.236482
Cluster 136: learning or memory
observed gene count: 15
expected gene count: 13.6296787015568
uncorrected p-value: 0.387287107219538
GO ID	term	observed gene count	expected gene count	uncorrected p-value
GO:0007635	chemosensory behavior	1	0.378602	0.332851
GO:0007611	learning or memory	6	4.92183	0.369049
GO:0008355	olfactory learning	8	6.81484	0.371478
GO:0042048	olfactory behavior	6	5.42663	0.463429
Cluster 137: spermatogenesis
observed gene count: 18
expected gene count: 16.5322954620735
uncorrected p-value: 0.387506127250839
GO ID	term	observed gene count	expected gene count	uncorrected p-value
GO:0007286	spermatid development	7	5.17423	0.25457
GO:0048515	spermatid differentiation	1	1.00961	0.660236
GO:0007283	spermatogenesis	11	11.9891	0.666527
Cluster 138: nuclear migration
observed gene count: 2
expected gene count: 1.3882080158993
uncorrected p-value: 0.413072711064943
GO ID	term	observed gene count	expected gene count	uncorrected p-value
GO:0051647	nucleus localization	1	0.378602	0.332851
GO:0007097	nuclear migration	1	0.757204	0.554951
Cluster 139: positive regulation of transcription initiation from RNA polymerase II promoter
observed gene count: 1
expected gene count: 0.504802914872474
uncorrected p-value: 0.41706279158396
GO ID	term	observed gene count	expected gene count	uncorrected p-value
GO:0060261	positive regulation of transcription initiation from RNA polymerase II promoter	1	0.252401	0.236482
Cluster 140: intercellular bridge organization
observed gene count: 1
expected gene count: 0.504802914872474
uncorrected p-value: 0.41706279158396
GO ID	term	observed gene count	expected gene count	uncorrected p-value
GO:0043063	intercellular bridge organization	1	0.252401	0.236482
Cluster 141: determination of adult life span
observed gene count: 19
expected gene count: 18.2991056641272
uncorrected p-value: 0.467619399356235
GO ID	term	observed gene count	expected gene count	uncorrected p-value
GO:0008340	determination of adult life span	19	18.1729	0.454944
Cluster 142: protein amino acid lipidation
observed gene count: 10
expected gene count: 9.46505465385889
uncorrected p-value: 0.477777930806595
GO ID	term	observed gene count	expected gene count	uncorrected p-value
GO:0048015	phosphoinositide-mediated signaling	3	0.631004	0.0164687
GO:0046854	phosphoinositide phosphorylation	4	2.14541	0.158103
GO:0046474	glycerophospholipid biosynthetic process	1	0.252401	0.236482
GO:0006506	GPI anchor biosynthetic process	3	2.27161	0.401124
GO:0006497	protein amino acid lipidation	1	0.631004	0.490649
GO:0008654	phospholipid biosynthetic process	1	1.76681	0.848858
Cluster 143: chemotaxis
observed gene count: 1
expected gene count: 0.631003643590593
uncorrected p-value: 0.490649391678888
GO ID	term	observed gene count	expected gene count	uncorrected p-value
GO:0006935	chemotaxis	1	0.504803	0.417063
Cluster 144: positive regulation of caspase activity
observed gene count: 1
expected gene count: 0.631003643590593
uncorrected p-value: 0.490649391678888
GO ID	term	observed gene count	expected gene count	uncorrected p-value
GO:0043280	positive regulation of caspase activity	1	0.126201	0.126201
Cluster 145: mating behavior
observed gene count: 10
expected gene count: 9.59125538257701
uncorrected p-value: 0.495311809596818
GO ID	term	observed gene count	expected gene count	uncorrected p-value
GO:0045433	male courtship behavior, veined wing generated song production	6	2.39781	0.0253134
GO:0060179	male mating behavior	1	0.883405	0.611139
GO:0007617	mating behavior	1	1.13581	0.703137
GO:0008049	male courtship behavior	3	4.41703	0.83596
GO:0007619	courtship behavior	2	3.28122	0.857714
Cluster 146: cyclin catabolic process
observed gene count: 7
expected gene count: 6.68863862206029
uncorrected p-value: 0.510312757114668
GO ID	term	observed gene count	expected gene count	uncorrected p-value
GO:0008054	cyclin catabolic process	5	1.13581	0.00258311
GO:0010498	proteasomal protein catabolic process	1	0.378602	0.332851
GO:0043161	proteasomal ubiquitin-dependent protein catabolic process	1	5.17423	0.996069
Cluster 147: visual perception
observed gene count: 2
expected gene count: 1.76681020205366
uncorrected p-value: 0.542949482340654
GO ID	term	observed gene count	expected gene count	uncorrected p-value
GO:0007601	visual perception	2	1.76681	0.542949
Cluster 148: JNK cascade
observed gene count: 7
expected gene count: 7.445842994369
uncorrected p-value: 0.6283883077105
GO ID	term	observed gene count	expected gene count	uncorrected p-value
GO:0043085	positive regulation of catalytic activity	1	0.126201	0.126201
GO:0042325	regulation of phosphorylation	2	1.00961	0.267458
GO:0007254	JNK cascade	4	3.15502	0.389551
GO:0000165	MAPKKK cascade	1	1.26201	0.740624
Cluster 149: exocytosis
observed gene count: 20
expected gene count: 21.327923153362
uncorrected p-value: 0.656161974694535
GO ID	term	observed gene count	expected gene count	uncorrected p-value
GO:0007267	cell-cell signaling	6	0.883405	2.50556e-05
GO:0006887	exocytosis	3	2.01921	0.328464
GO:0016079	synaptic vesicle exocytosis	2	2.65022	0.762921
GO:0006836	neurotransmitter transport	2	3.02882	0.824909
GO:0007269	neurotransmitter secretion	9	11.6105	0.836411
GO:0007268	synaptic transmission	3	5.93143	0.946762
Cluster 150: chromatin assembly
observed gene count: 16
expected gene count: 17.2894998343822
uncorrected p-value: 0.668911888958171
GO ID	term	observed gene count	expected gene count	uncorrected p-value
GO:0065004	protein-DNA complex assembly	2	0.378602	0.0437436
GO:0034728	nucleosome organization	1	0.126201	0.126201
GO:0031497	chromatin assembly	1	0.252401	0.236482
GO:0006334	nucleosome assembly	12	16.2799	0.902904
GO:0006333	chromatin assembly or disassembly	8	15.1441	0.988348
Cluster 151: defense response to bacterium
observed gene count: 13
expected gene count: 14.5130838025836
uncorrected p-value: 0.706504193810143
GO ID	term	observed gene count	expected gene count	uncorrected p-value
GO:0050829	defense response to Gram-negative bacterium	7	6.43624	0.468085
GO:0042742	defense response to bacterium	6	7.19344	0.741651
Cluster 152: negative regulation of translation
observed gene count: 2
expected gene count: 2.77641603179861
uncorrected p-value: 0.785449604859958
GO ID	term	observed gene count	expected gene count	uncorrected p-value
GO:0017148	negative regulation of translation	2	2.77642	0.78545
Cluster 153: nucleoside metabolic process
observed gene count: 1
expected gene count: 1.51440874461742
uncorrected p-value: 0.80199974953068
GO ID	term	observed gene count	expected gene count	uncorrected p-value
GO:0009116	nucleoside metabolic process	1	1.51441	0.802
Cluster 154: response to heat
observed gene count: 4
expected gene count: 8.70785028155018
uncorrected p-value: 0.980459040729431
GO ID	term	observed gene count	expected gene count	uncorrected p-value
GO:0009408	response to heat	4	8.45545	0.976341
Cluster 155: proton transport
observed gene count: 1
expected gene count: 4.54322623385227
uncorrected p-value: 0.992269667529612
GO ID	term	observed gene count	expected gene count	uncorrected p-value
GO:0015992	proton transport	1	3.91222	0.984801
Cluster 156: cation transport
observed gene count: 4
expected gene count: 11.3580655846307
uncorrected p-value: 0.997642822922508
GO ID	term	observed gene count	expected gene count	uncorrected p-value
GO:0006814	sodium ion transport	3	6.56244	0.967719
GO:0006812	cation transport	1	3.53362	0.977199
Cluster 157: proteolysis
observed gene count: 45
expected gene count: 78.3706525339516
uncorrected p-value: 0.999996156416306
GO ID	term	observed gene count	expected gene count	uncorrected p-value
GO:0030163	protein catabolic process	5	2.65022	0.115873
GO:0006511	ubiquitin-dependent protein catabolic process	10	9.96986	0.546875
GO:0006508	proteolysis	30	68.9056	1

## Sheet: Embryo6-8h
sample name: Embryo6-8h
number of associated genes in the sample: 1577
Cluster 1: RNA splicing
observed gene count: 130
expected gene count: 26.117919841007
uncorrected p-value: 8.57583535790997e-62
GO ID	term	observed gene count	expected gene count	uncorrected p-value
GO:0000398	nuclear mRNA splicing, via spliceosome	113	22.2525	6.17974e-55
GO:0008380	RNA splicing	12	1.4626	1.21138e-10
GO:0006397	mRNA processing	12	2.08943	9.18091e-08
GO:0006396	RNA processing	7	2.29838	0.00556296
GO:0000375	RNA splicing, via transesterification reactions	2	0.313415	0.0304478
Cluster 2: regulation of transcription, DNA-dependent
observed gene count: 160
expected gene count: 47.4301424312686
uncorrected p-value: 3.59456132082164e-47
GO ID	term	observed gene count	expected gene count	uncorrected p-value
GO:0006357	regulation of transcription from RNA polymerase II promoter	66	13.1634	5.1855e-32
GO:0006355	regulation of transcription, DNA-dependent	110	36.983	4.09238e-27
Cluster 3: negative regulation of gene expression
observed gene count: 104
expected gene count: 24.8642596886386
uncorrected p-value: 1.50861292613748e-40
GO ID	term	observed gene count	expected gene count	uncorrected p-value
GO:0000122	negative regulation of transcription from RNA polymerase II promoter	66	14.626	1.71228e-28
GO:0045892	negative regulation of transcription, DNA-dependent	42	8.56668	2.39098e-20
GO:0010629	negative regulation of gene expression	22	6.05936	3.09905e-08
Cluster 4: eye development
observed gene count: 102
expected gene count: 26.7447499171911
uncorrected p-value: 1.62607433024152e-35
GO ID	term	observed gene count	expected gene count	uncorrected p-value
GO:0007423	sensory organ development	32	6.2683	1.68825e-16
GO:0001745	compound eye morphogenesis	34	8.67115	4.16392e-13
GO:0048749	compound eye development	40	12.0142	2.04035e-12
GO:0001654	eye development	8	1.25366	4.69354e-06
GO:0001751	compound eye photoreceptor cell differentiation	10	2.61179	0.000112503
GO:0048592	eye morphogenesis	4	0.835773	0.0058783
GO:0046530	photoreceptor cell differentiation	2	0.417887	0.0566986
GO:0001754	eye photoreceptor cell differentiation	1	0.522358	0.424079
Cluster 5: positive regulation of gene expression
observed gene count: 92
expected gene count: 23.2971844981782
uncorrected p-value: 1.52839258202176e-33
GO ID	term	observed gene count	expected gene count	uncorrected p-value
GO:0045944	positive regulation of transcription from RNA polymerase II promoter	68	17.3423	7.28364e-25
GO:0045893	positive regulation of transcription, DNA-dependent	34	7.93985	1.79201e-14
GO:0010628	positive regulation of gene expression	6	1.77602	0.00577045
Cluster 6: mitosis
observed gene count: 133
expected gene count: 47.0122557138125
uncorrected p-value: 3.49675066962257e-30
GO ID	term	observed gene count	expected gene count	uncorrected p-value
GO:0007052	mitotic spindle organization	66	19.6407	7.54988e-20
GO:0007067	mitosis	37	10.0293	3.68906e-13
GO:0007049	cell cycle	17	3.86545	3.98446e-08
GO:0007076	mitotic chromosome condensation	13	2.40285	7.03828e-08
GO:0007059	chromosome segregation	15	3.44757	3.0134e-07
GO:0000070	mitotic sister chromatid segregation	11	2.40285	6.41726e-06
GO:0000278	mitotic cell cycle	10	3.34309	0.00112243
GO:0000819	sister chromatid segregation	3	0.522358	0.00967646
GO:0030261	chromosome condensation	6	2.08943	0.013759
GO:0007051	spindle organization	4	1.14919	0.0214549
GO:0007017	microtubule-based process	9	4.91017	0.0517185
GO:0000087	M phase of mitotic cell cycle	2	0.417887	0.0566986
GO:0007010	cytoskeleton organization	7	4.49228	0.156689
GO:0000226	microtubule cytoskeleton organization	5	3.23862	0.218166
GO:0000280	nuclear division	1	0.731302	0.538167
Cluster 7: cell motion
observed gene count: 127
expected gene count: 45.6541238820802
uncorrected p-value: 4.48405217272682e-28
GO ID	term	observed gene count	expected gene count	uncorrected p-value
GO:0048813	dendrite morphogenesis	50	13.7903	6.27262e-17
GO:0007411	axon guidance	52	16.1931	5.54029e-15
GO:0048666	neuron development	22	4.28334	7.8207e-12
GO:0030182	neuron differentiation	5	0.940245	0.00108593
GO:0007409	axonogenesis	12	5.22358	0.00453377
GO:0000904	cell morphogenesis involved in differentiation	2	0.208943	0.0109081
GO:0048812	neuron projection morphogenesis	17	10.9695	0.0444869
GO:0000902	cell morphogenesis	9	4.91017	0.0517185
GO:0006928	cell motion	2	0.417887	0.0566986
GO:0031175	neuron projection development	1	0.313415	0.281829
Cluster 8: neuroblast fate commitment
observed gene count: 25
expected gene count: 2.92520702219278
uncorrected p-value: 6.02625553021112e-22
GO ID	term	observed gene count	expected gene count	uncorrected p-value
GO:0007400	neuroblast fate determination	25	2.82074	7.16619e-23
GO:0014017	neuroblast fate commitment	1	0.104472	0.104472
Cluster 9: regulation of nuclear mRNA splicing, via spliceosome
observed gene count: 36
expected gene count: 6.16382908247764
uncorrected p-value: 4.35423333251581e-21
GO ID	term	observed gene count	expected gene count	uncorrected p-value
GO:0000381	regulation of alternative nuclear mRNA splicing, via spliceosome	33	5.32806	1.32545e-20
GO:0048024	regulation of nuclear mRNA splicing, via spliceosome	6	0.835773	2.99458e-05
Cluster 10: dorsal closure
observed gene count: 74
expected gene count: 24.4463729711825
uncorrected p-value: 4.38365059491859e-19
GO ID	term	observed gene count	expected gene count	uncorrected p-value
GO:0016318	ommatidial rotation	16	2.92521	1.67583e-09
GO:0007391	dorsal closure	29	9.29798	1.20746e-08
GO:0042067	establishment of ommatidial polarity	13	3.02968	2.28377e-06
GO:0001736	establishment of planar polarity	13	3.13415	3.64546e-06
GO:0007163	establishment or maintenance of cell polarity	12	3.34309	4.96956e-05
GO:0002009	morphogenesis of an epithelium	9	2.61179	0.000624617
GO:0001738	morphogenesis of a polarized epithelium	6	1.67155	0.00409103
GO:0001700	embryonic development via the syncytial blastoderm	12	5.22358	0.00453377
GO:0048598	embryonic morphogenesis	4	1.04472	0.0148634
GO:0060429	epithelium development	2	0.313415	0.0304478
GO:0016331	morphogenesis of embryonic epithelium	3	0.835773	0.0426267
GO:0007164	establishment of tissue polarity	2	0.731302	0.16086
GO:0009792	embryonic development ending in birth or egg hatching	2	1.04472	0.281254
Cluster 11: segmentation
observed gene count: 72
expected gene count: 23.7150712156343
uncorrected p-value: 1.10424375162489e-18
GO ID	term	observed gene count	expected gene count	uncorrected p-value
GO:0007389	pattern specification process	13	2.19391	1.53144e-08
GO:0007350	blastoderm segmentation	11	2.29838	3.69716e-06
GO:0008595	determination of anterior/posterior axis, embryo	14	3.86545	1.04352e-05
GO:0009952	anterior/posterior pattern formation	9	1.88049	2.9287e-05
GO:0009880	embryonic pattern specification	9	2.29838	0.000203223
GO:0045451	pole plasm oskar mRNA localization	9	3.23862	0.00346406
GO:0009798	axis specification	4	0.835773	0.0058783
GO:0007314	oocyte anterior/posterior axis specification	7	2.50732	0.00937797
GO:0035282	segmentation	5	1.4626	0.0110449
GO:0009948	anterior/posterior axis specification	3	0.731302	0.028846
GO:0007309	oocyte axis specification	4	1.56708	0.0634277
GO:0007315	pole plasm assembly	4	1.67155	0.0778368
GO:0007317	regulation of pole plasm oskar mRNA localization	5	2.61179	0.112832
GO:0048599	oocyte development	2	0.731302	0.16086
GO:0019094	pole plasm mRNA localization	2	0.731302	0.16086
GO:0007310	oocyte dorsal/ventral axis specification	4	2.19391	0.170124
GO:0007281	germ cell development	5	3.13415	0.198799
GO:0008298	intracellular mRNA localization	4	2.40285	0.214419
GO:0045995	regulation of embryonic development	1	0.313415	0.281829
GO:0008358	maternal determination of anterior/posterior axis, embryo	1	0.417887	0.356872
GO:0007316	pole plasm RNA localization	1	0.417887	0.356872
GO:0000578	embryonic axis specification	1	0.522358	0.424079
Cluster 12: cell proliferation
observed gene count: 54
expected gene count: 14.6260351109639
uncorrected p-value: 1.36428573617621e-18
GO ID	term	observed gene count	expected gene count	uncorrected p-value
GO:0055059	asymmetric neuroblast division	16	3.13415	6.5318e-09
GO:0045167	asymmetric protein localization involved in cell fate determination	10	1.4626	1.01671e-07
GO:0008283	cell proliferation	23	7.62643	7.56779e-07
GO:0008105	asymmetric protein localization	8	1.67155	8.30237e-05
GO:0007405	neuroblast proliferation	9	2.08943	8.33024e-05
GO:0048103	somatic stem cell division	5	0.940245	0.00108593
GO:0040001	establishment of mitotic spindle localization	5	0.940245	0.00108593
GO:0045175	basal protein localization	4	0.835773	0.0058783
GO:0051294	establishment of spindle orientation	3	0.522358	0.00967646
GO:0055057	neuroblast division	1	0.208943	0.198035
GO:0017145	stem cell division	1	0.522358	0.424079
Cluster 13: tube morphogenesis
observed gene count: 50
expected gene count: 13.9992050347797
uncorrected p-value: 1.29987782465705e-16
GO ID	term	observed gene count	expected gene count	uncorrected p-value
GO:0007424	open tracheal system development	41	11.074	1.70639e-14
GO:0001763	morphogenesis of a branching structure	5	0.731302	0.000216757
GO:0060446	branching involved in open tracheal system development	5	0.835773	0.000528109
GO:0007428	primary branching, open tracheal system	6	1.56708	0.00280215
GO:0048754	branching morphogenesis of a tube	2	0.208943	0.0109081
GO:0007430	terminal branching, open tracheal system	5	1.67155	0.0202004
GO:0035239	tube morphogenesis	2	0.417887	0.0566986
GO:0060541	respiratory system development	1	0.104472	0.104472
Cluster 14: stem cell maintenance
observed gene count: 36
expected gene count: 7.83537595230209
uncorrected p-value: 1.84590713774467e-16
GO ID	term	observed gene count	expected gene count	uncorrected p-value
GO:0008356	asymmetric cell division	16	2.50732	6.09679e-11
GO:0030718	germ-line stem cell maintenance	16	3.86545	2.8345e-07
GO:0042078	germ-line stem cell division	9	2.19391	0.000132303
GO:0019827	stem cell maintenance	3	0.731302	0.028846
GO:0045596	negative regulation of cell differentiation	2	0.417887	0.0566986
GO:0048863	stem cell differentiation	2	0.522358	0.0880467
Cluster 15: transcription initiation
observed gene count: 49
expected gene count: 13.9992050347797
uncorrected p-value: 6.77290466567066e-16
GO ID	term	observed gene count	expected gene count	uncorrected p-value
GO:0006367	transcription initiation from RNA polymerase II promoter	22	6.68619	2.38572e-07
GO:0006366	transcription from RNA polymerase II promoter	18	5.01464	6.76555e-07
GO:0006351	transcription, DNA-dependent	17	4.70123	1.22176e-06
GO:0006352	transcription initiation	2	0.940245	0.240611
GO:0006461	protein complex assembly	1	0.313415	0.281829
Cluster 16: sensory organ boundary specification
observed gene count: 23
expected gene count: 3.86545213646903
uncorrected p-value: 3.37358317952414e-14
GO ID	term	observed gene count	expected gene count	uncorrected p-value
GO:0007432	salivary gland boundary specification	11	1.35813	1.0015e-09
GO:0016360	sensory organ precursor cell fate determination	12	2.19391	1.93802e-07
GO:0008052	sensory organ boundary specification	1	0.731302	0.538167
Cluster 17: regulation of mitosis
observed gene count: 52
expected gene count: 16.9244120569725
uncorrected p-value: 4.25493792285594e-14
GO ID	term	observed gene count	expected gene count	uncorrected p-value
GO:0007346	regulation of mitotic cell cycle	14	3.23862	8.29327e-07
GO:0051726	regulation of cell cycle	22	8.46221	1.92327e-05
GO:0007088	regulation of mitosis	10	2.50732	7.44435e-05
GO:0007094	mitotic cell cycle spindle assembly checkpoint	4	1.14919	0.0214549
GO:0030071	regulation of mitotic metaphase/anaphase transition	3	0.835773	0.0426267
GO:0045841	negative regulation of mitotic metaphase/anaphase transition	1	0.104472	0.104472
GO:0045786	negative regulation of cell cycle	1	0.313415	0.281829
GO:0045839	negative regulation of mitosis	1	0.313415	0.281829
GO:0007093	mitotic cell cycle checkpoint	1	0.940245	0.629666
Cluster 18: metamorphosis
observed gene count: 83
expected gene count: 36.2516727393177
uncorrected p-value: 2.42831118291335e-13
GO ID	term	observed gene count	expected gene count	uncorrected p-value
GO:0007476	imaginal disc-derived wing morphogenesis	56	20.5809	1.34765e-12
GO:0007444	imaginal disc development	10	3.44757	0.00146157
GO:0007472	wing disc morphogenesis	4	1.77602	0.093721
GO:0035107	appendage morphogenesis	1	0.104472	0.104472
GO:0035120	post-embryonic appendage morphogenesis	1	0.104472	0.104472
GO:0035220	wing disc development	11	7.41749	0.118198
GO:0007560	imaginal disc morphogenesis	2	0.62683	0.123142
GO:0009791	post-embryonic development	1	0.208943	0.198035
GO:0002165	instar larval or pupal development	2	1.14919	0.321699
GO:0007552	metamorphosis	4	3.76098	0.527353
Cluster 19: wing disc pattern formation
observed gene count: 37
expected gene count: 10.1337528983107
uncorrected p-value: 5.37103193865712e-13
GO ID	term	observed gene count	expected gene count	uncorrected p-value
GO:0035222	wing disc pattern formation	9	1.4626	1.7813e-06
GO:0007447	imaginal disc pattern formation	7	1.14919	3.0261e-05
GO:0009953	dorsal/ventral pattern formation	11	2.82074	4.16545e-05
GO:0007450	dorsal/ventral pattern formation, imaginal disc	6	1.04472	0.00018648
GO:0048190	wing disc dorsal/ventral pattern formation	14	4.91017	0.000214216
Cluster 20: neuron fate commitment
observed gene count: 32
expected gene count: 8.2532626697582
uncorrected p-value: 2.93515909522013e-12
GO ID	term	observed gene count	expected gene count	uncorrected p-value
GO:0045465	R8 cell differentiation	5	0.62683	6.78009e-05
GO:0001751	compound eye photoreceptor cell differentiation	10	2.61179	0.000112503
GO:0007460	R8 cell fate commitment	5	0.731302	0.000216757
GO:0042051	compound eye photoreceptor development	8	2.40285	0.00162084
GO:0046552	photoreceptor cell fate commitment	2	0.208943	0.0109081
GO:0048663	neuron fate commitment	3	0.62683	0.0178562
GO:0042461	photoreceptor cell development	2	0.313415	0.0304478
GO:0046530	photoreceptor cell differentiation	2	0.417887	0.0566986
GO:0001752	compound eye photoreceptor fate commitment	3	0.940245	0.0590839
GO:0001754	eye photoreceptor cell differentiation	1	0.522358	0.424079
Cluster 21: leg disc development
observed gene count: 29
expected gene count: 7.10407419675389
uncorrected p-value: 6.59441975724388e-12
GO ID	term	observed gene count	expected gene count	uncorrected p-value
GO:0007474	imaginal disc-derived wing vein specification	19	4.49228	1.40572e-08
GO:0007479	leg disc proximal/distal pattern formation	9	1.67155	8.37328e-06
GO:0007473	wing disc proximal/distal pattern formation	5	0.62683	6.78009e-05
GO:0035218	leg disc development	4	0.835773	0.0058783
GO:0035309	wing and notum subfield formation	3	0.62683	0.0178562
GO:0009954	proximal/distal pattern formation	1	0.104472	0.104472
GO:0035223	leg disc pattern formation	1	0.208943	0.198035
GO:0007449	proximal/distal pattern formation, imaginal disc	1	0.313415	0.281829
Cluster 22: rRNA processing
observed gene count: 26
expected gene count: 5.95488572374959
uncorrected p-value: 1.25140660240897e-11
GO ID	term	observed gene count	expected gene count	uncorrected p-value
GO:0006364	rRNA processing	14	3.13415	5.03097e-07
GO:0042254	ribosome biogenesis	12	2.92521	9.96822e-06
GO:0016072	rRNA metabolic process	1	0.208943	0.198035
Cluster 23: cell division
observed gene count: 19
expected gene count: 3.34309373964889
uncorrected p-value: 1.89151279930741e-11
GO ID	term	observed gene count	expected gene count	uncorrected p-value
GO:0008356	asymmetric cell division	16	2.50732	6.09679e-11
GO:0051301	cell division	2	0.313415	0.0304478
GO:0017145	stem cell division	1	0.522358	0.424079
Cluster 24: regulation of neurogenesis
observed gene count: 18
expected gene count: 3.02967870155681
uncorrected p-value: 2.24519816442832e-11
GO ID	term	observed gene count	expected gene count	uncorrected p-value
GO:0050767	regulation of neurogenesis	7	0.835773	9.75963e-07
GO:0051960	regulation of nervous system development	4	0.417887	0.000118717
GO:0007406	negative regulation of neuroblast proliferation	4	0.731302	0.0032032
GO:0050768	negative regulation of neurogenesis	3	0.417887	0.00419703
GO:0045664	regulation of neuron differentiation	2	0.417887	0.0566986
GO:0045314	regulation of compound eye photoreceptor development	2	0.522358	0.0880467
GO:0046532	regulation of photoreceptor cell differentiation	1	0.104472	0.104472
Cluster 25: segment specification
observed gene count: 23
expected gene count: 4.91016893010931
uncorrected p-value: 3.15608789330016e-11
GO ID	term	observed gene count	expected gene count	uncorrected p-value
GO:0007379	segment specification	12	2.08943	9.18091e-08
GO:0035288	anterior head segmentation	6	0.731302	8.21842e-06
GO:0007380	specification of segmental identity, head	6	1.14919	0.000373942
GO:0007418	ventral midline development	4	0.940245	0.00971219
GO:0035289	posterior head segmentation	4	1.04472	0.0148634
Cluster 26: leg disc development
observed gene count: 30
expected gene count: 8.04431931103014
uncorrected p-value: 4.51207365603134e-11
GO ID	term	observed gene count	expected gene count	uncorrected p-value
GO:0007480	imaginal disc-derived leg morphogenesis	20	5.74594	2.93968e-07
GO:0016348	imaginal disc-derived leg joint morphogenesis	6	1.14919	0.000373942
GO:0035218	leg disc development	4	0.835773	0.0058783
GO:0007478	leg disc morphogenesis	2	0.208943	0.0109081
GO:0007366	periodic partitioning by pair rule gene	2	0.731302	0.16086
Cluster 27: histone exchange
observed gene count: 15
expected gene count: 2.29837694600861
uncorrected p-value: 1.5158152199035e-10
GO ID	term	observed gene count	expected gene count	uncorrected p-value
GO:0016573	histone acetylation	11	1.77602	1.06623e-07
GO:0043044	ATP-dependent chromatin remodeling	4	0.417887	0.000118717
GO:0043486	histone exchange	1	0.313415	0.281829
Cluster 28: salivary gland development
observed gene count: 26
expected gene count: 6.58171579993375
uncorrected p-value: 1.9599053598512e-10
GO ID	term	observed gene count	expected gene count	uncorrected p-value
GO:0007435	salivary gland morphogenesis	19	5.22358	2.60366e-07
GO:0007431	salivary gland development	12	2.61179	2.29839e-06
Cluster 29: gonad development
observed gene count: 30
expected gene count: 8.56667770785028
uncorrected p-value: 2.81240042019715e-10
GO ID	term	observed gene count	expected gene count	uncorrected p-value
GO:0008406	gonad development	17	3.44757	4.39993e-09
GO:0007280	pole cell migration	9	2.40285	0.000303076
GO:0008354	germ cell migration	11	3.55204	0.000458844
GO:0007548	sex differentiation	6	1.67155	0.00409103
GO:0007506	gonadal mesoderm development	4	0.835773	0.0058783
Cluster 30: lateral inhibition
observed gene count: 56
expected gene count: 23.5061278569063
uncorrected p-value: 3.99234974767481e-10
GO ID	term	observed gene count	expected gene count	uncorrected p-value
GO:0046331	lateral inhibition	43	20.372	1.54003e-06
GO:0045468	regulation of R8 cell spacing in compound eye	5	0.522358	1.23744e-05
GO:0008587	imaginal disc-derived wing margin morphogenesis	11	2.82074	4.16545e-05
GO:0045465	R8 cell differentiation	5	0.62683	6.78009e-05
GO:0007460	R8 cell fate commitment	5	0.731302	0.000216757
Cluster 31: gene silencing
observed gene count: 22
expected gene count: 5.01464060947334
uncorrected p-value: 4.24192326623105e-10
GO ID	term	observed gene count	expected gene count	uncorrected p-value
GO:0006342	chromatin silencing	18	3.86545	5.04369e-09
GO:0016458	gene silencing	8	1.67155	8.30237e-05
Cluster 32: chromatin organization
observed gene count: 24
expected gene count: 5.95488572374959
uncorrected p-value: 5.94618208817314e-10
GO ID	term	observed gene count	expected gene count	uncorrected p-value
GO:0006325	chromatin organization	17	3.02968	2.94749e-10
GO:0051276	chromosome organization	9	3.02968	0.00208414
GO:0016568	chromatin modification	1	0.208943	0.198035
Cluster 33: metaphase plate congression
observed gene count: 20
expected gene count: 4.28333885392514
uncorrected p-value: 6.61448412317545e-10
GO ID	term	observed gene count	expected gene count	uncorrected p-value
GO:0000070	mitotic sister chromatid segregation	11	2.40285	6.41726e-06
GO:0007080	mitotic metaphase plate congression	7	1.25366	6.60554e-05
GO:0051310	metaphase plate congression	3	0.313415	0.0011383
GO:0000819	sister chromatid segregation	3	0.522358	0.00967646
Cluster 34: genitalia development
observed gene count: 22
expected gene count: 5.32805564756542
uncorrected p-value: 1.77284922822095e-09
GO ID	term	observed gene count	expected gene count	uncorrected p-value
GO:0035224	genital disc anterior/posterior pattern formation	7	0.835773	9.75963e-07
GO:0035215	genital disc development	9	1.4626	1.7813e-06
GO:0035277	spiracle morphogenesis, open tracheal system	10	2.08943	1.03843e-05
GO:0007448	anterior/posterior pattern formation, imaginal disc	6	0.835773	2.99458e-05
GO:0048100	wing disc anterior/posterior pattern formation	7	1.25366	6.60554e-05
GO:0035217	labial disc development	4	0.417887	0.000118717
GO:0035263	genital disc sexually dimorphic development	3	0.522358	0.00967646
GO:0007418	ventral midline development	4	0.940245	0.00971219
GO:0048806	genitalia development	2	0.417887	0.0566986
Cluster 35: spliceosome assembly
observed gene count: 12
expected gene count: 1.67154686982445
uncorrected p-value: 1.98149460612524e-09
GO ID	term	observed gene count	expected gene count	uncorrected p-value
GO:0006376	mRNA splice site selection	7	0.731302	1.34216e-07
GO:0000245	spliceosome assembly	5	0.731302	0.000216757
Cluster 36: meiosis
observed gene count: 32
expected gene count: 10.4471679364028
uncorrected p-value: 3.56587854400095e-09
GO ID	term	observed gene count	expected gene count	uncorrected p-value
GO:0007059	chromosome segregation	15	3.44757	3.0134e-07
GO:0016321	female meiosis chromosome segregation	8	3.23862	0.0122614
GO:0007143	female meiosis	6	2.61179	0.0401054
GO:0007126	meiosis	5	2.19391	0.0608724
GO:0051321	meiotic cell cycle	1	0.104472	0.104472
Cluster 37: gastrulation
observed gene count: 31
expected gene count: 9.92480953958264
uncorrected p-value: 3.66746261315613e-09
GO ID	term	observed gene count	expected gene count	uncorrected p-value
GO:0007498	mesoderm development	20	6.9996	9.86304e-06
GO:0001710	mesodermal cell fate commitment	4	0.62683	0.00149666
GO:0007501	mesodermal cell fate specification	5	1.14919	0.00332825
GO:0007369	gastrulation	7	2.61179	0.0118747
GO:0048332	mesoderm morphogenesis	1	0.104472	0.104472
GO:0001707	mesoderm formation	1	0.208943	0.198035
Cluster 38: mitotic cell cycle, embryonic
observed gene count: 14
expected gene count: 2.50732030473667
uncorrected p-value: 1.24473211697797e-08
GO ID	term	observed gene count	expected gene count	uncorrected p-value
GO:0035186	syncytial blastoderm mitotic cell cycle	11	1.56708	1.43542e-08
GO:0045448	mitotic cell cycle, embryonic	3	0.940245	0.0590839
Cluster 39: midgut development
observed gene count: 19
expected gene count: 4.4922822126532
uncorrected p-value: 1.405718060069e-08
GO ID	term	observed gene count	expected gene count	uncorrected p-value
GO:0007494	midgut development	13	3.13415	3.64546e-06
GO:0007385	specification of segmental identity, abdomen	5	0.731302	0.000216757
GO:0035290	trunk segmentation	5	1.04472	0.00198538
GO:0035292	specification of segmental identity, trunk	1	0.104472	0.104472
Cluster 40: gut development
observed gene count: 21
expected gene count: 5.6414706856575
uncorrected p-value: 3.81279490526975e-08
GO ID	term	observed gene count	expected gene count	uncorrected p-value
GO:0007442	hindgut morphogenesis	9	1.98496	5.04893e-05
GO:0007443	Malpighian tubule morphogenesis	11	3.34309	0.000251845
GO:0007440	foregut morphogenesis	6	1.14919	0.000373942
GO:0048546	digestive tract morphogenesis	2	0.208943	0.0109081
GO:0048619	embryonic hindgut morphogenesis	2	0.522358	0.0880467
GO:0007439	ectodermal gut development	1	0.104472	0.104472
GO:0048565	gut development	1	0.313415	0.281829
GO:0048567	ectodermal gut morphogenesis	1	0.417887	0.356872
Cluster 41: hemopoiesis
observed gene count: 17
expected gene count: 3.86545213646903
uncorrected p-value: 3.9844632950982e-08
GO ID	term	observed gene count	expected gene count	uncorrected p-value
GO:0048542	lymph gland development	12	1.88049	1.65343e-08
GO:0030097	hemopoiesis	7	2.19391	0.00416281
Cluster 42: R8 cell differentiation
observed gene count: 14
expected gene count: 2.71626366346472
uncorrected p-value: 5.00591959280916e-08
GO ID	term	observed gene count	expected gene count	uncorrected p-value
GO:0045465	R8 cell differentiation	5	0.62683	6.78009e-05
GO:0007460	R8 cell fate commitment	5	0.731302	0.000216757
GO:0045464	R8 cell fate specification	5	1.04472	0.00198538
GO:0048665	neuron fate specification	3	0.731302	0.028846
GO:0043704	photoreceptor cell fate specification	1	0.208943	0.198035
Cluster 43: regulation of cell fate specification
observed gene count: 10
expected gene count: 1.46260351109639
uncorrected p-value: 1.01671349815802e-07
GO ID	term	observed gene count	expected gene count	uncorrected p-value
GO:0042659	regulation of cell fate specification	6	0.940245	8.18522e-05
GO:0009996	negative regulation of cell fate specification	4	0.522358	0.000544088
Cluster 44: epithelial cell migration, open tracheal system
observed gene count: 15
expected gene count: 3.23862206028486
uncorrected p-value: 1.06961156103317e-07
GO ID	term	observed gene count	expected gene count	uncorrected p-value
GO:0007427	epithelial cell migration, open tracheal system	15	3.23862	1.06961e-07
Cluster 45: regulation of cell adhesion
observed gene count: 13
expected gene count: 2.71626366346472
uncorrected p-value: 4.73100290982643e-07
GO ID	term	observed gene count	expected gene count	uncorrected p-value
GO:0035050	embryonic heart tube development	9	1.77602	1.61408e-05
GO:0022409	positive regulation of cell-cell adhesion	3	0.62683	0.0178562
GO:0030155	regulation of cell adhesion	2	0.417887	0.0566986
GO:0022407	regulation of cell-cell adhesion	1	0.104472	0.104472
Cluster 46: cell motion
observed gene count: 32
expected gene count: 12.7455448824114
uncorrected p-value: 6.36909222339416e-07
GO ID	term	observed gene count	expected gene count	uncorrected p-value
GO:0007298	border follicle cell migration	26	9.71587	1.92419e-06
GO:0016477	cell migration	6	2.40285	0.027342
GO:0006928	cell motion	2	0.417887	0.0566986
GO:0007297	ovarian follicle cell migration	3	1.14919	0.0992533
Cluster 47: centrosome cycle
observed gene count: 30
expected gene count: 11.8052997681351
uncorrected p-value: 1.07229570014404e-06
GO ID	term	observed gene count	expected gene count	uncorrected p-value
GO:0051297	centrosome organization	18	5.32806	1.90093e-06
GO:0007099	centriole replication	10	2.08943	1.03843e-05
GO:0051298	centrosome duplication	16	6.9996	0.00119644
GO:0007098	centrosome cycle	4	0.940245	0.00971219
Cluster 48: G2/M transition of mitotic cell cycle
observed gene count: 11
expected gene count: 2.08943358728056
uncorrected p-value: 1.07363795230493e-06
GO ID	term	observed gene count	expected gene count	uncorrected p-value
GO:0000086	G2/M transition of mitotic cell cycle	6	0.835773	2.99458e-05
GO:0000082	G1/S transition of mitotic cell cycle	7	1.4626	0.000236905
Cluster 49: induction of apoptosis
observed gene count: 31
expected gene count: 12.6410732030474
uncorrected p-value: 1.64055064202639e-06
GO ID	term	observed gene count	expected gene count	uncorrected p-value
GO:0043066	negative regulation of apoptosis	15	5.43253	0.000191479
GO:0006917	induction of apoptosis	6	1.98496	0.0105452
GO:0042981	regulation of apoptosis	6	2.08943	0.013759
GO:0043065	positive regulation of apoptosis	3	0.940245	0.0590839
GO:0060548	negative regulation of cell death	2	1.14919	0.321699
GO:0043069	negative regulation of programmed cell death	1	0.731302	0.538167
Cluster 50: notum development
observed gene count: 8
expected gene count: 1.14918847300431
uncorrected p-value: 1.72322022763991e-06
GO ID	term	observed gene count	expected gene count	uncorrected p-value
GO:0007482	haltere development	7	0.940245	3.99257e-06
GO:0007477	notum development	3	0.417887	0.00419703
Cluster 51: sex determination
observed gene count: 11
expected gene count: 2.19390526664458
uncorrected p-value: 2.04145737971932e-06
GO ID	term	observed gene count	expected gene count	uncorrected p-value
GO:0007530	sex determination	10	1.88049	2.99459e-06
GO:0007541	sex determination, primary response to X:A ratio	4	0.522358	0.000544088
GO:0007539	primary sex determination, soma	3	0.313415	0.0011383
GO:0019101	female somatic sex determination	3	0.522358	0.00967646
GO:0030237	female sex determination	2	0.313415	0.0304478
GO:0018993	somatic sex determination	1	0.417887	0.356872
Cluster 52: startle response
observed gene count: 10
expected gene count: 1.98496190791653
uncorrected p-value: 5.7289914520726e-06
GO ID	term	observed gene count	expected gene count	uncorrected p-value
GO:0048854	brain morphogenesis	10	1.67155	6.67525e-07
GO:0001964	startle response	9	1.4626	1.7813e-06
GO:0031987	locomotion involved in locomotory behavior	9	1.67155	8.37328e-06
Cluster 53: compound eye cone cell fate commitment
observed gene count: 9
expected gene count: 1.67154686982445
uncorrected p-value: 8.37328266310879e-06
GO ID	term	observed gene count	expected gene count	uncorrected p-value
GO:0045468	regulation of R8 cell spacing in compound eye	5	0.522358	1.23744e-05
GO:0042676	compound eye cone cell fate commitment	4	0.62683	0.00149666
GO:0042675	compound eye cone cell differentiation	3	0.835773	0.0426267
Cluster 54: zonula adherens assembly
observed gene count: 14
expected gene count: 3.96992381583306
uncorrected p-value: 1.49420242768521e-05
GO ID	term	observed gene count	expected gene count	uncorrected p-value
GO:0045186	zonula adherens assembly	6	1.04472	0.00018648
GO:0007043	cell-cell junction assembly	4	0.62683	0.00149666
GO:0019991	septate junction assembly	8	2.82074	0.00502558
Cluster 55: cardioblast differentiation
observed gene count: 8
expected gene count: 1.46260351109639
uncorrected p-value: 2.34799942290413e-05
GO ID	term	observed gene count	expected gene count	uncorrected p-value
GO:0035051	cardiac cell differentiation	5	0.731302	0.000216757
GO:0010002	cardioblast differentiation	4	0.940245	0.00971219
Cluster 56: glial cell differentiation
observed gene count: 7
expected gene count: 1.25366015236833
uncorrected p-value: 6.60554216852586e-05
GO ID	term	observed gene count	expected gene count	uncorrected p-value
GO:0010001	glial cell differentiation	6	1.14919	0.000373942
GO:0007403	glial cell fate determination	3	0.313415	0.0011383
Cluster 57: dosage compensation
observed gene count: 7
expected gene count: 1.25366015236833
uncorrected p-value: 6.60554216852586e-05
GO ID	term	observed gene count	expected gene count	uncorrected p-value
GO:0007549	dosage compensation	7	1.14919	3.0261e-05
GO:0016457	dosage compensation complex assembly during dosage compensation by hyperactivation of X chromosome	3	0.522358	0.00967646
GO:0009047	dosage compensation, by hyperactivation of X chromosome	3	0.835773	0.0426267
Cluster 58: hemopoiesis
observed gene count: 13
expected gene count: 3.96992381583306
uncorrected p-value: 7.40464635845102e-05
GO ID	term	observed gene count	expected gene count	uncorrected p-value
GO:0030097	hemopoiesis	7	2.19391	0.00416281
GO:0042690	negative regulation of crystal cell differentiation	3	0.417887	0.00419703
GO:0035167	larval lymph gland hemopoiesis	4	0.835773	0.0058783
GO:0035162	embryonic hemopoiesis	3	0.522358	0.00967646
GO:0042688	crystal cell differentiation	3	0.731302	0.028846
GO:0045610	regulation of hemocyte differentiation	4	1.35813	0.0392685
GO:0045611	negative regulation of hemocyte differentiation	1	0.104472	0.104472
GO:0042386	hemocyte differentiation	2	0.731302	0.16086
GO:0042689	regulation of crystal cell differentiation	1	0.208943	0.198035
Cluster 59: head involution
observed gene count: 17
expected gene count: 6.3727724412057
uncorrected p-value: 0.000117206447908571
GO ID	term	observed gene count	expected gene count	uncorrected p-value
GO:0046665	amnioserosa maintenance	4	0.522358	0.000544088
GO:0007390	germ-band shortening	7	1.98496	0.00217411
GO:0008258	head involution	11	4.28334	0.00255604
GO:0035160	maintenance of epithelial integrity, open tracheal system	5	1.25366	0.00521854
GO:0010669	epithelial structure maintenance	1	0.208943	0.198035
Cluster 60: negative regulation of transcription from RNA polymerase II promoter, mitotic
observed gene count: 4
expected gene count: 0.417886717456111
uncorrected p-value: 0.000118717122372933
GO ID	term	observed gene count	expected gene count	uncorrected p-value
GO:0007070	negative regulation of transcription from RNA polymerase II promoter, mitotic	4	0.417887	0.000118717
Cluster 61: DNA replication
observed gene count: 16
expected gene count: 5.85041404438556
uncorrected p-value: 0.000133867700537107
GO ID	term	observed gene count	expected gene count	uncorrected p-value
GO:0006261	DNA-dependent DNA replication	7	1.56708	0.000404211
GO:0006260	DNA replication	11	4.49228	0.00383073
GO:0006259	DNA metabolic process	2	0.522358	0.0880467
Cluster 62: regulation of protein localization
observed gene count: 12
expected gene count: 3.65650877774097
uncorrected p-value: 0.000136380107315585
GO ID	term	observed gene count	expected gene count	uncorrected p-value
GO:0042306	regulation of protein import into nucleus	3	0.62683	0.0178562
GO:0051533	positive regulation of NFAT protein import into nucleus	5	1.67155	0.0202004
GO:0032880	regulation of protein localization	3	0.731302	0.028846
GO:0033157	regulation of intracellular protein transport	1	0.104472	0.104472
GO:0042993	positive regulation of transcription factor import into nucleus	1	0.208943	0.198035
Cluster 63: endocytosis
observed gene count: 55
expected gene count: 33.744352434581
uncorrected p-value: 0.000180058312609967
GO ID	term	observed gene count	expected gene count	uncorrected p-value
GO:0006911	phagocytosis, engulfment	38	18.7004	1.5483e-05
GO:0016044	membrane organization	5	1.35813	0.00775847
GO:0006909	phagocytosis	5	1.88049	0.0332556
GO:0006897	endocytosis	5	4.38781	0.450596
GO:0016192	vesicle-mediated transport	4	8.98456	0.983332
Cluster 64: regulation of transcription factor activity
observed gene count: 9
expected gene count: 2.29837694600861
uncorrected p-value: 0.000203223109687859
GO ID	term	observed gene count	expected gene count	uncorrected p-value
GO:0051090	regulation of transcription factor activity	9	1.98496	5.04893e-05
Cluster 65: muscle fiber development
observed gene count: 17
expected gene count: 6.68618747929778
uncorrected p-value: 0.000222414105768921
GO ID	term	observed gene count	expected gene count	uncorrected p-value
GO:0007528	neuromuscular junction development	9	4.0744	0.0170249
GO:0048747	muscle fiber development	3	0.835773	0.0426267
GO:0007519	skeletal muscle tissue development	4	1.4626	0.0505579
GO:0060537	muscle tissue development	2	0.417887	0.0566986
Cluster 66: synaptogenesis
observed gene count: 18
expected gene count: 7.41748923484598
uncorrected p-value: 0.000277308011297109
GO ID	term	observed gene count	expected gene count	uncorrected p-value
GO:0007416	synaptogenesis	7	2.61179	0.0118747
GO:0007528	neuromuscular junction development	9	4.0744	0.0170249
GO:0050808	synapse organization	2	1.25366	0.361543
Cluster 67: dorsal appendage formation
observed gene count: 22
expected gene count: 10.0292812189467
uncorrected p-value: 0.000297350583453441
GO ID	term	observed gene count	expected gene count	uncorrected p-value
GO:0007307	eggshell chorion gene amplification	11	1.88049	2.4819e-07
GO:0046843	dorsal appendage formation	9	3.55204	0.0067693
GO:0007304	chorion-containing eggshell formation	4	3.34309	0.433295
Cluster 68: nuclear export
observed gene count: 13
expected gene count: 4.59675389201722
uncorrected p-value: 0.000390725761585547
GO ID	term	observed gene count	expected gene count	uncorrected p-value
GO:0006406	mRNA export from nucleus	6	1.98496	0.0105452
GO:0051168	nuclear export	3	0.62683	0.0178562
GO:0006403	RNA localization	2	0.313415	0.0304478
GO:0006913	nucleocytoplasmic transport	2	0.835773	0.200271
Cluster 69: oenocyte differentiation
observed gene count: 17
expected gene count: 6.99960251738986
uncorrected p-value: 0.000401664886293716
GO ID	term	observed gene count	expected gene count	uncorrected p-value
GO:0046845	branched duct epithelial cell fate determination, open tracheal system	9	0.940245	1.45242e-09
GO:0035225	determination of genital disc primordium	9	1.04472	1.31655e-08
GO:0007421	stomatogastric nervous system development	3	0.313415	0.0011383
GO:0001742	oenocyte differentiation	1	0.104472	0.104472
GO:0048149	behavioral response to ethanol	7	5.01464	0.231353
Cluster 70: regulation of R7 cell differentiation
observed gene count: 10
expected gene count: 3.02967870155681
uncorrected p-value: 0.000466528667104973
GO ID	term	observed gene count	expected gene count	uncorrected p-value
GO:0046580	negative regulation of Ras protein signal transduction	8	1.77602	0.000142475
GO:0045678	positive regulation of R7 cell differentiation	3	0.522358	0.00967646
GO:0046532	regulation of photoreceptor cell differentiation	1	0.104472	0.104472
GO:0045676	regulation of R7 cell differentiation	1	0.522358	0.424079
Cluster 71: negative regulation of RNA splicing
observed gene count: 4
expected gene count: 0.522358396820139
uncorrected p-value: 0.000544088021647281
GO ID	term	observed gene count	expected gene count	uncorrected p-value
GO:0048025	negative regulation of nuclear mRNA splicing, via spliceosome	3	0.313415	0.0011383
GO:0033119	negative regulation of RNA splicing	1	0.208943	0.198035
Cluster 72: oogenesis
observed gene count: 69
expected gene count: 47.2211990725406
uncorrected p-value: 0.000788028475106124
GO ID	term	observed gene count	expected gene count	uncorrected p-value
GO:0048477	oogenesis	54	20.7899	2.46303e-11
GO:0030707	ovarian follicle cell development	24	5.64147	1.51338e-10
GO:0032504	multicellular organism reproduction	2	22.7748	1
Cluster 73: myoblast fusion
observed gene count: 11
expected gene count: 3.760980457105
uncorrected p-value: 0.00079203937197458
GO ID	term	observed gene count	expected gene count	uncorrected p-value
GO:0007520	myoblast fusion	9	3.13415	0.00270525
GO:0007519	skeletal muscle tissue development	4	1.4626	0.0505579
Cluster 74: growth
observed gene count: 14
expected gene count: 5.53699900629347
uncorrected p-value: 0.000828705568919522
GO ID	term	observed gene count	expected gene count	uncorrected p-value
GO:0007446	imaginal disc growth	9	1.77602	1.61408e-05
GO:0016049	cell growth	3	1.4626	0.173867
GO:0040007	growth	3	2.19391	0.378369
Cluster 75: epidermis development
observed gene count: 14
expected gene count: 5.53699900629347
uncorrected p-value: 0.000828705568919522
GO ID	term	observed gene count	expected gene count	uncorrected p-value
GO:0008544	epidermis development	7	1.4626	0.000236905
GO:0001737	establishment of imaginal disc-derived wing hair orientation	8	2.61179	0.00295773
GO:0035317	imaginal disc-derived wing hair organization	1	1.88049	0.862939
Cluster 76: regulation of cell growth
observed gene count: 16
expected gene count: 7.10407419675389
uncorrected p-value: 0.00141558329301872
GO ID	term	observed gene count	expected gene count	uncorrected p-value
GO:0046622	positive regulation of organ growth	5	0.835773	0.000528109
GO:0045927	positive regulation of growth	5	1.14919	0.00332825
GO:0030307	positive regulation of cell growth	5	1.98496	0.0413664
GO:0040018	positive regulation of multicellular organism growth	5	2.29838	0.072273
GO:0040014	regulation of multicellular organism growth	3	1.56708	0.201477
GO:0001558	regulation of cell growth	3	1.67155	0.230009
GO:0045793	positive regulation of cell size	3	2.19391	0.378369
Cluster 77: DNA repair
observed gene count: 27
expected gene count: 15.04392182842
uncorrected p-value: 0.00185849129975454
GO ID	term	observed gene count	expected gene count	uncorrected p-value
GO:0006281	DNA repair	17	5.95489	4.57055e-05
GO:0006974	response to DNA damage stimulus	12	9.92481	0.287272
Cluster 78: establishment of cell polarity
observed gene count: 10
expected gene count: 3.55203709837695
uncorrected p-value: 0.00187936633157414
GO ID	term	observed gene count	expected gene count	uncorrected p-value
GO:0045198	establishment of epithelial cell apical/basal polarity	4	0.940245	0.00971219
GO:0030010	establishment of cell polarity	2	0.522358	0.0880467
GO:0045197	establishment or maintenance of epithelial cell apical/basal polarity	4	1.77602	0.093721
GO:0035088	establishment or maintenance of apical/basal cell polarity	3	1.25366	0.12248
GO:0035089	establishment of apical/basal cell polarity	1	0.208943	0.198035
Cluster 79: tRNA processing
observed gene count: 8
expected gene count: 2.50732030473667
uncorrected p-value: 0.00221113213964506
GO ID	term	observed gene count	expected gene count	uncorrected p-value
GO:0008033	tRNA processing	5	1.35813	0.00775847
GO:0006400	tRNA modification	2	0.731302	0.16086
GO:0009451	RNA modification	1	0.313415	0.281829
Cluster 80: retinal cell programmed cell death
observed gene count: 8
expected gene count: 2.50732030473667
uncorrected p-value: 0.00221113213964506
GO ID	term	observed gene count	expected gene count	uncorrected p-value
GO:0046667	compound eye retinal cell programmed cell death	6	1.04472	0.00018648
GO:0046666	retinal cell programmed cell death	3	0.417887	0.00419703
GO:0030720	oocyte localization during germarium-derived egg chamber formation	4	1.35813	0.0392685
GO:0010623	developmental programmed cell death	1	0.313415	0.281829
Cluster 81: morphogenesis of follicular epithelium
observed gene count: 8
expected gene count: 2.50732030473667
uncorrected p-value: 0.00221113213964506
GO ID	term	observed gene count	expected gene count	uncorrected p-value
GO:0016333	morphogenesis of follicular epithelium	4	1.04472	0.0148634
GO:0016334	establishment or maintenance of polarity of follicular epithelium	3	1.14919	0.0992533
GO:0008069	dorsal/ventral axis specification, ovarian follicular epithelium	2	0.731302	0.16086
Cluster 82: regulation of tube size, open tracheal system
observed gene count: 9
expected gene count: 3.13415038092083
uncorrected p-value: 0.00270524974832384
GO ID	term	observed gene count	expected gene count	uncorrected p-value
GO:0035151	regulation of tube size, open tracheal system	6	1.88049	0.00790173
GO:0035152	regulation of tube architecture, open tracheal system	3	1.35813	0.147444
Cluster 83: gastrulation
observed gene count: 10
expected gene count: 3.86545213646903
uncorrected p-value: 0.0037359495609258
GO ID	term	observed gene count	expected gene count	uncorrected p-value
GO:0007369	gastrulation	7	2.61179	0.0118747
GO:0007370	ventral furrow formation	5	1.56708	0.0151662
GO:0010004	gastrulation involving germ band extension	2	1.14919	0.321699
Cluster 84: dorsal closure, leading edge cell fate determination
observed gene count: 3
expected gene count: 0.417886717456111
uncorrected p-value: 0.00419703493746137
GO ID	term	observed gene count	expected gene count	uncorrected p-value
GO:0007393	dorsal closure, leading edge cell fate determination	3	0.313415	0.0011383
Cluster 85: cell adhesion
observed gene count: 24
expected gene count: 13.8947333554157
uncorrected p-value: 0.00534651083812577
GO ID	term	observed gene count	expected gene count	uncorrected p-value
GO:0016337	cell-cell adhesion	10	2.19391	1.79688e-05
GO:0007155	cell adhesion	17	12.4321	0.113248
Cluster 86: female germ-line cyst encapsulation
observed gene count: 11
expected gene count: 4.70122557138125
uncorrected p-value: 0.00556746003603505
GO ID	term	observed gene count	expected gene count	uncorrected p-value
GO:0030713	ovarian follicle cell stalk formation	6	1.77602	0.00577045
GO:0016333	morphogenesis of follicular epithelium	4	1.04472	0.0148634
GO:0030708	germarium-derived female germ-line cyst encapsulation	4	1.04472	0.0148634
GO:0048139	female germ-line cyst encapsulation	1	0.104472	0.104472
GO:0007293	germarium-derived egg chamber formation	2	2.08943	0.633364
Cluster 87: ovarian follicle cell stalk formation
observed gene count: 6
expected gene count: 1.77601854918847
uncorrected p-value: 0.00577044610108024
GO ID	term	observed gene count	expected gene count	uncorrected p-value
GO:0030713	ovarian follicle cell stalk formation	6	1.77602	0.00577045
Cluster 88: female sex determination
observed gene count: 4
expected gene count: 0.835773434912223
uncorrected p-value: 0.00587829645216094
GO ID	term	observed gene count	expected gene count	uncorrected p-value
GO:0030237	female sex determination	2	0.313415	0.0304478
GO:0019099	female germ-line sex determination	2	0.417887	0.0566986
Cluster 89: septate junction assembly
observed gene count: 8
expected gene count: 2.92520702219278
uncorrected p-value: 0.00640295874701753
GO ID	term	observed gene count	expected gene count	uncorrected p-value
GO:0019991	septate junction assembly	8	2.82074	0.00502558
Cluster 90: regulation of growth
observed gene count: 11
expected gene count: 4.80569725074528
uncorrected p-value: 0.00664162829913591
GO ID	term	observed gene count	expected gene count	uncorrected p-value
GO:0045570	regulation of imaginal disc growth	5	1.14919	0.00332825
GO:0046620	regulation of organ growth	5	1.67155	0.0202004
GO:0040008	regulation of growth	3	2.08943	0.34862
Cluster 91: central nervous system neuron development
observed gene count: 2
expected gene count: 0.208943358728056
uncorrected p-value: 0.0109081334754013
GO ID	term	observed gene count	expected gene count	uncorrected p-value
GO:0021954	central nervous system neuron development	1	0.104472	0.104472
GO:0021955	central nervous system neuron axonogenesis	1	0.104472	0.104472
Cluster 92: growth
observed gene count: 13
expected gene count: 6.58171579993375
uncorrected p-value: 0.012132453520297
GO ID	term	observed gene count	expected gene count	uncorrected p-value
GO:0048675	axon extension	5	2.08943	0.0505689
GO:0048588	developmental cell growth	1	0.104472	0.104472
GO:0016049	cell growth	3	1.4626	0.173867
GO:0040007	growth	3	2.19391	0.378369
GO:0008361	regulation of cell size	2	1.56708	0.474662
Cluster 93: phosphorylation
observed gene count: 39
expected gene count: 27.0581649552832
uncorrected p-value: 0.0123268374226892
GO ID	term	observed gene count	expected gene count	uncorrected p-value
GO:0006468	protein amino acid phosphorylation	36	24.3419	0.0107385
GO:0016310	phosphorylation	3	2.71626	0.520141
Cluster 94: regulation of JNK cascade
observed gene count: 4
expected gene count: 1.04471679364028
uncorrected p-value: 0.0148633959064176
GO ID	term	observed gene count	expected gene count	uncorrected p-value
GO:0046328	regulation of JNK cascade	4	0.940245	0.00971219
Cluster 95: regulation of ARF GTPase activity
observed gene count: 5
expected gene count: 1.56707519046042
uncorrected p-value: 0.0151662035509305
GO ID	term	observed gene count	expected gene count	uncorrected p-value
GO:0032312	regulation of ARF GTPase activity	4	0.835773	0.0058783
GO:0032012	regulation of ARF protein signal transduction	1	0.62683	0.484266
Cluster 96: regulation of compound eye pigmentation
observed gene count: 3
expected gene count: 0.626830076184167
uncorrected p-value: 0.0178562483055734
GO ID	term	observed gene count	expected gene count	uncorrected p-value
GO:0048076	regulation of compound eye pigmentation	3	0.522358	0.00967646
Cluster 97: neuron recognition
observed gene count: 8
expected gene count: 3.55203709837695
uncorrected p-value: 0.0213258071020607
GO ID	term	observed gene count	expected gene count	uncorrected p-value
GO:0016199	axon midline choice point recognition	7	2.61179	0.0118747
GO:0008038	neuron recognition	3	0.731302	0.028846
Cluster 98: mRNA catabolic process
observed gene count: 5
expected gene count: 1.8804902285525
uncorrected p-value: 0.033255578235176
GO ID	term	observed gene count	expected gene count	uncorrected p-value
GO:0000184	nuclear-transcribed mRNA catabolic process, nonsense-mediated decay	3	1.25366	0.12248
GO:0000956	nuclear-transcribed mRNA catabolic process	1	0.313415	0.281829
GO:0006402	mRNA catabolic process	1	0.522358	0.424079
Cluster 99: protein ubiquitination
observed gene count: 8
expected gene count: 3.86545213646903
uncorrected p-value: 0.0343272399326779
GO ID	term	observed gene count	expected gene count	uncorrected p-value
GO:0016567	protein ubiquitination	8	3.86545	0.0343272
Cluster 100: RNA interference
observed gene count: 9
expected gene count: 4.59675389201722
uncorrected p-value: 0.0355978203475638
GO ID	term	observed gene count	expected gene count	uncorrected p-value
GO:0016246	RNA interference	9	2.61179	0.000624617
GO:0035195	gene silencing by miRNA	4	2.29838	0.191868
Cluster 101: methylation
observed gene count: 11
expected gene count: 6.05935740311361
uncorrected p-value: 0.0357957236935861
GO ID	term	observed gene count	expected gene count	uncorrected p-value
GO:0001510	RNA methylation	4	0.835773	0.0058783
GO:0016571	histone methylation	3	1.35813	0.147444
GO:0032259	methylation	2	0.940245	0.240611
GO:0016570	histone modification	1	0.417887	0.356872
GO:0006730	one-carbon metabolic process	1	1.67155	0.829051
Cluster 102: ovarian nurse cell to oocyte transport
observed gene count: 6
expected gene count: 2.71626366346472
uncorrected p-value: 0.0476917141610302
GO ID	term	observed gene count	expected gene count	uncorrected p-value
GO:0007300	ovarian nurse cell to oocyte transport	4	1.35813	0.0392685
GO:0007303	cytoplasmic transport, nurse cell to oocyte	3	1.56708	0.201477
Cluster 103: actin filament organization
observed gene count: 17
expected gene count: 11.0739980125869
uncorrected p-value: 0.0480393068302417
GO ID	term	observed gene count	expected gene count	uncorrected p-value
GO:0030036	actin cytoskeleton organization	9	5.22358	0.0719954
GO:0007015	actin filament organization	10	7.20855	0.179877
Cluster 104: female gonad development
observed gene count: 4
expected gene count: 1.46260351109639
uncorrected p-value: 0.0505579358156454
GO ID	term	observed gene count	expected gene count	uncorrected p-value
GO:0008585	female gonad development	3	1.14919	0.0992533
GO:0046660	female sex differentiation	1	0.417887	0.356872
Cluster 105: immune response
observed gene count: 16
expected gene count: 10.4471679364028
uncorrected p-value: 0.054907443168982
GO ID	term	observed gene count	expected gene count	uncorrected p-value
GO:0019730	antimicrobial humoral response	11	4.28334	0.00255604
GO:0006955	immune response	5	5.22358	0.609504
GO:0006959	humoral immune response	1	2.19391	0.901608
Cluster 106: pigment metabolic process
observed gene count: 2
expected gene count: 0.417886717456111
uncorrected p-value: 0.0566985796103665
GO ID	term	observed gene count	expected gene count	uncorrected p-value
GO:0042440	pigment metabolic process	2	0.417887	0.0566986
Cluster 107: negative regulation of translation
observed gene count: 7
expected gene count: 3.55203709837695
uncorrected p-value: 0.0583904834968634
GO ID	term	observed gene count	expected gene count	uncorrected p-value
GO:0017148	negative regulation of translation	4	2.29838	0.191868
GO:0046011	regulation of oskar mRNA translation	2	0.835773	0.200271
GO:0007319	negative regulation of oskar mRNA translation	2	0.835773	0.200271
Cluster 108: JNK cascade
observed gene count: 7
expected gene count: 3.55203709837695
uncorrected p-value: 0.0583904834968634
GO ID	term	observed gene count	expected gene count	uncorrected p-value
GO:0007254	JNK cascade	6	2.61179	0.0401054
GO:0007243	protein kinase cascade	1	0.104472	0.104472
GO:0000165	MAPKKK cascade	2	1.04472	0.281254
Cluster 109: DNA recombination
observed gene count: 8
expected gene count: 4.28333885392514
uncorrected p-value: 0.058771089803251
GO ID	term	observed gene count	expected gene count	uncorrected p-value
GO:0006310	DNA recombination	4	1.77602	0.093721
GO:0007131	reciprocal meiotic recombination	4	2.50732	0.237645
Cluster 110: maintenance of protein location
observed gene count: 3
expected gene count: 0.94024511427625
uncorrected p-value: 0.0590839163396603
GO ID	term	observed gene count	expected gene count	uncorrected p-value
GO:0032507	maintenance of protein location in cell	2	0.522358	0.0880467
GO:0045185	maintenance of protein location	1	0.417887	0.356872
Cluster 111: apoptosis
observed gene count: 10
expected gene count: 5.95488572374959
uncorrected p-value: 0.0692171788201031
GO ID	term	observed gene count	expected gene count	uncorrected p-value
GO:0006915	apoptosis	9	4.59675	0.0355978
GO:0008219	cell death	1	1.14919	0.703047
GO:0012501	programmed cell death	1	1.56708	0.809086
Cluster 112: visual behavior
observed gene count: 8
expected gene count: 4.4922822126532
uncorrected p-value: 0.0742790282805414
GO ID	term	observed gene count	expected gene count	uncorrected p-value
GO:0007632	visual behavior	4	1.67155	0.0778368
GO:0050908	detection of light stimulus involved in visual perception	2	0.731302	0.16086
GO:0009416	response to light stimulus	2	1.77602	0.542999
Cluster 113: regulation of retinal cell programmed cell death
observed gene count: 3
expected gene count: 1.04471679364028
uncorrected p-value: 0.0780355679539071
GO ID	term	observed gene count	expected gene count	uncorrected p-value
GO:0046672	positive regulation of compound eye retinal cell programmed cell death	2	0.62683	0.123142
GO:0046668	regulation of retinal cell programmed cell death	1	0.417887	0.356872
Cluster 114: chemotaxis
observed gene count: 2
expected gene count: 0.522358396820139
uncorrected p-value: 0.0880466624764892
GO ID	term	observed gene count	expected gene count	uncorrected p-value
GO:0050919	negative chemotaxis	1	0.104472	0.104472
GO:0006935	chemotaxis	1	0.417887	0.356872
Cluster 115: germarium-derived oocyte fate determination
observed gene count: 6
expected gene count: 3.23862206028486
uncorrected p-value: 0.0980887650574662
GO ID	term	observed gene count	expected gene count	uncorrected p-value
GO:0007294	germarium-derived oocyte fate determination	6	2.92521	0.065354
Cluster 116: regulation of DNA replication
observed gene count: 3
expected gene count: 1.14918847300431
uncorrected p-value: 0.0992533144703216
GO ID	term	observed gene count	expected gene count	uncorrected p-value
GO:0008156	negative regulation of DNA replication	2	0.731302	0.16086
GO:0006275	regulation of DNA replication	1	0.417887	0.356872
Cluster 117: BMP signaling pathway
observed gene count: 20
expected gene count: 14.834978469692
uncorrected p-value: 0.10247274191462
GO ID	term	observed gene count	expected gene count	uncorrected p-value
GO:0045705	negative regulation of salivary gland boundary specification	5	0.835773	0.000528109
GO:0030509	BMP signaling pathway	5	0.835773	0.000528109
GO:0045887	positive regulation of synaptic growth at neuromuscular junction	6	1.56708	0.00280215
GO:0045927	positive regulation of growth	5	1.14919	0.00332825
GO:0007179	transforming growth factor beta receptor signaling pathway	7	2.19391	0.00416281
GO:0016202	regulation of striated muscle tissue development	2	0.731302	0.16086
GO:0050807	regulation of synapse organization	1	1.04472	0.668379
GO:0008582	regulation of synaptic growth at neuromuscular junction	1	2.40285	0.921119
GO:0007268	synaptic transmission	1	4.91017	0.994453
Cluster 118: regulation of translation
observed gene count: 6
expected gene count: 3.34309373964889
uncorrected p-value: 0.110619369879454
GO ID	term	observed gene count	expected gene count	uncorrected p-value
GO:0006417	regulation of translation	3	1.35813	0.147444
GO:0017148	negative regulation of translation	4	2.29838	0.191868
Cluster 119: regulation of phosphorylation
observed gene count: 5
expected gene count: 2.6117919841007
uncorrected p-value: 0.112831693788093
GO ID	term	observed gene count	expected gene count	uncorrected p-value
GO:0042325	regulation of phosphorylation	3	0.835773	0.0426267
GO:0045860	positive regulation of protein kinase activity	1	0.313415	0.281829
GO:0045859	regulation of protein kinase activity	1	1.35813	0.761895
Cluster 120: protein transport
observed gene count: 30
expected gene count: 24.1329579330904
uncorrected p-value: 0.123891709994094
GO ID	term	observed gene count	expected gene count	uncorrected p-value
GO:0008104	protein localization	17	4.70123	1.22176e-06
GO:0034504	protein localization in nucleus	1	0.104472	0.104472
GO:0034613	cellular protein localization	1	0.208943	0.198035
GO:0006913	nucleocytoplasmic transport	2	0.835773	0.200271
GO:0045184	establishment of protein localization	1	0.62683	0.484266
GO:0006886	intracellular protein transport	6	7.83538	0.808978
GO:0006606	protein import into nucleus	1	2.50732	0.929372
GO:0015031	protein transport	1	6.9996	0.999395
Cluster 121: regulation of actin filament-based process
observed gene count: 5
expected gene count: 2.82073534282875
uncorrected p-value: 0.14475851561454
GO ID	term	observed gene count	expected gene count	uncorrected p-value
GO:0032956	regulation of actin cytoskeleton organization	4	0.731302	0.0032032
GO:0032970	regulation of actin filament-based process	1	0.208943	0.198035
GO:0008064	regulation of actin polymerization or depolymerization	1	0.835773	0.586438
Cluster 122: pigmentation during development
observed gene count: 3
expected gene count: 1.35813183173236
uncorrected p-value: 0.147443525629434
GO ID	term	observed gene count	expected gene count	uncorrected p-value
GO:0048066	pigmentation during development	3	1.35813	0.147444
Cluster 123: larval feeding behavior
observed gene count: 4
expected gene count: 2.19390526664458
uncorrected p-value: 0.170123814368981
GO ID	term	observed gene count	expected gene count	uncorrected p-value
GO:0030536	larval feeding behavior	4	1.56708	0.0634277
Cluster 124: positive regulation of JNK cascade
observed gene count: 3
expected gene count: 1.46260351109639
uncorrected p-value: 0.173866868305922
GO ID	term	observed gene count	expected gene count	uncorrected p-value
GO:0046330	positive regulation of JNK cascade	3	1.35813	0.147444
Cluster 125: DNA methylation
observed gene count: 1
expected gene count: 0.208943358728056
uncorrected p-value: 0.198035225252654
GO ID	term	observed gene count	expected gene count	uncorrected p-value
GO:0006306	DNA methylation	1	0.208943	0.198035
Cluster 126: negative regulation of JNK cascade
observed gene count: 3
expected gene count: 1.67154686982445
uncorrected p-value: 0.230008960413036
GO ID	term	observed gene count	expected gene count	uncorrected p-value
GO:0046329	negative regulation of JNK cascade	3	1.4626	0.173867
Cluster 127: learning
observed gene count: 14
expected gene count: 11.282941371315
uncorrected p-value: 0.235388965466471
GO ID	term	observed gene count	expected gene count	uncorrected p-value
GO:0007635	chemosensory behavior	1	0.313415	0.281829
GO:0042048	olfactory behavior	6	4.49228	0.29049
GO:0008355	olfactory learning	7	5.64147	0.33278
GO:0007611	learning or memory	5	4.0744	0.386315
GO:0007612	learning	1	1.35813	0.761895
Cluster 128: cytokinesis, contractile ring formation
observed gene count: 3
expected gene count: 1.77601854918847
uncorrected p-value: 0.259213516646718
GO ID	term	observed gene count	expected gene count	uncorrected p-value
GO:0000915	cytokinesis, contractile ring formation	3	1.56708	0.201477
Cluster 129: courtship behavior
observed gene count: 10
expected gene count: 7.93984763166611
uncorrected p-value: 0.268039531365868
GO ID	term	observed gene count	expected gene count	uncorrected p-value
GO:0045433	male courtship behavior, veined wing generated song production	6	1.98496	0.0105452
GO:0060179	male mating behavior	1	0.731302	0.538167
GO:0008049	male courtship behavior	3	3.65651	0.723174
GO:0007619	courtship behavior	2	2.71626	0.771325
Cluster 130: regulation of axonogenesis
observed gene count: 4
expected gene count: 2.71626366346472
uncorrected p-value: 0.285615425659956
GO ID	term	observed gene count	expected gene count	uncorrected p-value
GO:0045926	negative regulation of growth	3	1.04472	0.0780356
GO:0050770	regulation of axonogenesis	1	1.67155	0.829051
Cluster 131: protein amino acid glycosylation
observed gene count: 5
expected gene count: 3.65650877774097
uncorrected p-value: 0.300332959598579
GO ID	term	observed gene count	expected gene count	uncorrected p-value
GO:0006486	protein amino acid glycosylation	5	3.34309	0.238082
Cluster 132: nuclear migration
observed gene count: 2
expected gene count: 1.14918847300431
uncorrected p-value: 0.321699121158459
GO ID	term	observed gene count	expected gene count	uncorrected p-value
GO:0051647	nucleus localization	1	0.313415	0.281829
GO:0007097	nuclear migration	1	0.62683	0.484266
Cluster 133: negative regulation of mitotic cell cycle
observed gene count: 1
expected gene count: 0.522358396820139
uncorrected p-value: 0.424078816613266
GO ID	term	observed gene count	expected gene count	uncorrected p-value
GO:0045930	negative regulation of mitotic cell cycle	1	0.522358	0.424079
Cluster 134: memory
observed gene count: 10
expected gene count: 9.19350778403445
uncorrected p-value: 0.439418225715837
GO ID	term	observed gene count	expected gene count	uncorrected p-value
GO:0007616	long-term memory	7	5.43253	0.298011
GO:0007611	learning or memory	5	4.0744	0.386315
GO:0007613	memory	2	1.88049	0.574767
Cluster 135: determination of adult life span
observed gene count: 16
expected gene count: 15.148393507784
uncorrected p-value: 0.447888535171342
GO ID	term	observed gene count	expected gene count	uncorrected p-value
GO:0008340	determination of adult life span	16	15.0439	0.436529
Cluster 136: response to ecdysone
observed gene count: 4
expected gene count: 3.65650877774097
uncorrected p-value: 0.504497690224426
GO ID	term	observed gene count	expected gene count	uncorrected p-value
GO:0008286	insulin receptor signaling pathway	3	2.19391	0.378369
GO:0035075	response to ecdysone	1	1.25366	0.734093
Cluster 137: chromatin assembly
observed gene count: 12
expected gene count: 14.3126200728718
uncorrected p-value: 0.780996447372731
GO ID	term	observed gene count	expected gene count	uncorrected p-value
GO:0031497	chromatin assembly	2	0.208943	0.0109081
GO:0006334	nucleosome assembly	10	13.4768	0.878202
GO:0006333	chromatin assembly or disassembly	7	12.5366	0.973079
Cluster 138: visual perception
observed gene count: 1
expected gene count: 1.56707519046042
uncorrected p-value: 0.809086248001969
GO ID	term	observed gene count	expected gene count	uncorrected p-value
GO:0007601	visual perception	1	1.4626	0.786791
Cluster 139: defense response
observed gene count: 17
expected gene count: 20.6853925140775
uncorrected p-value: 0.836158367530592
GO ID	term	observed gene count	expected gene count	uncorrected p-value
GO:0050829	defense response to Gram-negative bacterium	7	5.32806	0.280926
GO:0006952	defense response	10	10.5516	0.619623
GO:0009617	response to bacterium	1	2.40285	0.921119
GO:0042742	defense response to bacterium	3	5.95489	0.945812
Cluster 140: cyclin catabolic process
observed gene count: 9
expected gene count: 11.8052997681351
uncorrected p-value: 0.847237185034879
GO ID	term	observed gene count	expected gene count	uncorrected p-value
GO:0008054	cyclin catabolic process	5	0.940245	0.00108593
GO:0010498	proteasomal protein catabolic process	1	0.313415	0.281829
GO:0006511	ubiquitin-dependent protein catabolic process	3	8.25326	0.991579
Cluster 141: protein processing
observed gene count: 1
expected gene count: 1.8804902285525
uncorrected p-value: 0.862938998868175
GO ID	term	observed gene count	expected gene count	uncorrected p-value
GO:0016485	protein processing	1	1.88049	0.862939
Cluster 142: spermatogenesis
observed gene count: 10
expected gene count: 13.6857899966876
uncorrected p-value: 0.88924809629277
GO ID	term	observed gene count	expected gene count	uncorrected p-value
GO:0048515	spermatid differentiation	1	0.835773	0.586438
GO:0007286	spermatid development	4	4.28334	0.632996
GO:0007283	spermatogenesis	9	9.92481	0.671567
Cluster 143: exocytosis
observed gene count: 13
expected gene count: 18.1780722093408
uncorrected p-value: 0.927228686624824
GO ID	term	observed gene count	expected gene count	uncorrected p-value
GO:0007267	cell-cell signaling	5	0.731302	0.000216757
GO:0006887	exocytosis	2	1.67155	0.509612
GO:0048488	synaptic vesicle endocytosis	2	3.13415	0.836004
GO:0006836	neurotransmitter transport	1	2.50732	0.929372
GO:0007269	neurotransmitter secretion	5	9.61139	0.969707
GO:0007268	synaptic transmission	1	4.91017	0.994453
Cluster 144: autophagic cell death
observed gene count: 4
expected gene count: 7.62643259357403
uncorrected p-value: 0.954633244186912
GO ID	term	observed gene count	expected gene count	uncorrected p-value
GO:0048102	autophagic cell death	4	5.95489	0.859778
GO:0035071	salivary gland cell autophagic cell death	4	6.89513	0.92445
Cluster 145: phospholipid biosynthetic process
observed gene count: 1
expected gene count: 3.13415038092083
uncorrected p-value: 0.963615391760579
GO ID	term	observed gene count	expected gene count	uncorrected p-value
GO:0008654	phospholipid biosynthetic process	1	1.4626	0.786791
Cluster 146: ion transport
observed gene count: 5
expected gene count: 14.3126200728718
uncorrected p-value: 0.999106831614404
GO ID	term	observed gene count	expected gene count	uncorrected p-value
GO:0006814	sodium ion transport	3	5.43253	0.919446
GO:0006811	ion transport	2	5.01464	0.967129
Cluster 147: proteolysis
observed gene count: 20
expected gene count: 64.8769128850613
uncorrected p-value: 0.999999999998511
GO ID	term	observed gene count	expected gene count	uncorrected p-value
GO:0030163	protein catabolic process	2	2.19391	0.660205
GO:0006511	ubiquitin-dependent protein catabolic process	3	8.25326	0.991579
GO:0006508	proteolysis	15	57.0415	1

## Sheet: Embryo8-10h
sample name: Embryo8-10h
number of associated genes in the sample: 1111
Cluster 1: regulation of transcription, DNA-dependent (regulation of transcription)
observed gene count: 117
expected gene count: 33.4146406094733
uncorrected p-value: 8.87116992853419e-35
GO ID	term	observed gene count	expected gene count	uncorrected p-value
GO:0006355	regulation of transcription, DNA-dependent	81	26.0546	1.04829e-20
GO:0006357	regulation of transcription from RNA polymerase II promoter	44	9.27367	3.22047e-19
Cluster 2: eye development
observed gene count: 76
expected gene count: 20.0193441536933
uncorrected p-value: 3.21522143038167e-25
GO ID	term	observed gene count	expected gene count	uncorrected p-value
GO:0001745	compound eye morphogenesis	31	6.10884	7.12331e-15
GO:0007423	sensory organ development	24	4.41603	1.38297e-12
GO:0048749	compound eye development	25	8.46406	7.37909e-07
GO:0042051	compound eye photoreceptor development	6	1.69281	0.00533297
GO:0001751	compound eye photoreceptor cell differentiation	6	1.84001	0.00824713
GO:0042461	photoreceptor cell development	2	0.220802	0.0154422
GO:0001654	eye development	3	0.883206	0.0529909
GO:0048592	eye morphogenesis	2	0.588804	0.112681
GO:0001754	eye photoreceptor cell differentiation	1	0.368003	0.317711
Cluster 3: negative regulation of gene expression
observed gene count: 70
expected gene count: 17.5169261344816
uncorrected p-value: 9.38610153554962e-25
GO ID	term	observed gene count	expected gene count	uncorrected p-value
GO:0000122	negative regulation of transcription from RNA polymerase II promoter	48	10.3041	1.84627e-20
GO:0045892	negative regulation of transcription, DNA-dependent	29	6.03524	2.72742e-13
GO:0010629	negative regulation of gene expression	16	4.26883	2.77998e-06
Cluster 4: cell motion (cell projection / neuronal morphogeneis)
observed gene count: 90
expected gene count: 32.1634315998675
uncorrected p-value: 1.28616875354681e-19
GO ID	term	observed gene count	expected gene count	uncorrected p-value
GO:0007411	axon guidance	39	11.4081	5.6215e-12
GO:0048813	dendrite morphogenesis	33	9.71527	2.88317e-10
GO:0048666	neuron development	13	3.01762	4.36502e-06
GO:0007409	axonogenesis	13	3.68003	4.71813e-05
GO:0030182	neuron differentiation	4	0.662405	0.00272329
GO:0000904	cell morphogenesis involved in differentiation	2	0.147201	0.00541252
GO:0000902	cell morphogenesis	9	3.45922	0.00656313
GO:0031175	neuron projection development	2	0.220802	0.0154422
GO:0048812	neuron projection morphogenesis	14	7.72806	0.0216051
GO:0006928	cell motion	2	0.294402	0.0293811
GO:0048667	cell morphogenesis involved in neuron differentiation	1	0.0736005	0.0736005
GO:0016358	dendrite development	1	0.147201	0.141789
Cluster 5: positive regulation of gene expression
observed gene count: 60
expected gene count: 16.4129181848294
uncorrected p-value: 2.97850705543572e-19
GO ID	term	observed gene count	expected gene count	uncorrected p-value
GO:0045944	positive regulation of transcription from RNA polymerase II promoter	49	12.2177	9.26525e-18
GO:0045893	positive regulation of transcription, DNA-dependent	15	5.59364	0.000367264
GO:0010628	positive regulation of gene expression	5	1.25121	0.00627186
Cluster 6: RNA splicing
observed gene count: 64
expected gene count: 18.4001324942034
uncorrected p-value: 3.10599055153733e-19
GO ID	term	observed gene count	expected gene count	uncorrected p-value
GO:0000398	nuclear mRNA splicing, via spliceosome	52	15.6769	6.13201e-15
GO:0006396	RNA processing	9	1.61921	1.26841e-05
GO:0008380	RNA splicing	7	1.03041	2.48656e-05
GO:0006397	mRNA processing	5	1.47201	0.0130716
GO:0016071	mRNA metabolic process	1	0.0736005	0.0736005
GO:0000375	RNA splicing, via transesterification reactions	1	0.220802	0.204962
Cluster 7: tube morphogenesis (tracheal morphogeneis)
observed gene count: 45
expected gene count: 10.3040741967539
uncorrected p-value: 5.20822832855023e-18
GO ID	term	observed gene count	expected gene count	uncorrected p-value
GO:0007424	open tracheal system development	37	7.80166	2.29246e-16
GO:0007426	tracheal outgrowth, open tracheal system	11	1.84001	5.56446e-07
GO:0007428	primary branching, open tracheal system	8	1.10401	3.38596e-06
GO:0007427	epithelial cell migration, open tracheal system	11	2.28162	7.00286e-06
GO:0001763	morphogenesis of a branching structure	5	0.515204	3.96559e-05
GO:0060446	branching involved in open tracheal system development	4	0.588804	0.00160622
GO:0060541	respiratory system development	1	0.0736005	0.0736005
GO:0048754	branching morphogenesis of a tube	1	0.147201	0.141789
GO:0035239	tube morphogenesis	1	0.294402	0.263489
Cluster 8: rRNA processing
observed gene count: 28
expected gene count: 4.19523020867837
uncorrected p-value: 2.54753231257818e-17
GO ID	term	observed gene count	expected gene count	uncorrected p-value
GO:0006364	rRNA processing	17	2.20802	2.31966e-12
GO:0042254	ribosome biogenesis	12	2.06081	2.39552e-07
Cluster 9: salivary gland development
observed gene count: 27
expected gene count: 4.63683338853925
uncorrected p-value: 6.98243951578095e-15
GO ID	term	observed gene count	expected gene count	uncorrected p-value
GO:0007435	salivary gland morphogenesis	21	3.68003	1.13937e-11
GO:0007431	salivary gland development	12	1.84001	5.04012e-08
Cluster 10: metamorphosis (morphogeneis)
observed gene count: 79
expected gene count: 32.3842331897979
uncorrected p-value: 7.1677662452293e-14
GO ID	term	observed gene count	expected gene count	uncorrected p-value
GO:0007476	imaginal disc-derived wing morphogenesis	39	14.4993	1.0465e-08
GO:0048749	compound eye development	25	8.46406	7.37909e-07
GO:0007444	imaginal disc development	8	2.42882	0.00221774
GO:0001654	eye development	3	0.883206	0.0529909
GO:0035107	appendage morphogenesis	1	0.0736005	0.0736005
GO:0035220	wing disc development	9	5.22564	0.0754795
GO:0009791	post-embryonic development	1	0.147201	0.141789
GO:0007560	imaginal disc morphogenesis	1	0.441603	0.367944
GO:0007552	metamorphosis	3	2.64962	0.500293
GO:0007472	wing disc morphogenesis	1	1.25121	0.727567
Cluster 11: dorsal closure
observed gene count: 46
expected gene count: 13.6160980457105
uncorrected p-value: 1.11364140621477e-13
GO ID	term	observed gene count	expected gene count	uncorrected p-value
GO:0007391	dorsal closure	23	6.55045	7.34966e-08
GO:0048598	embryonic morphogenesis	5	0.736005	0.000394314
GO:0001738	morphogenesis of a polarized epithelium	6	1.17761	0.000660147
GO:0001700	embryonic development via the syncytial blastoderm	11	3.68003	0.00084692
GO:0002009	morphogenesis of an epithelium	4	1.84001	0.107549
GO:0060429	epithelium development	1	0.220802	0.204962
GO:0016331	morphogenesis of embryonic epithelium	1	0.588804	0.457597
GO:0009792	embryonic development ending in birth or egg hatching	1	0.736005	0.534542
Cluster 12: oenocyte development
observed gene count: 16
expected gene count: 1.91361377939715
uncorrected p-value: 1.75584871103786e-12
GO ID	term	observed gene count	expected gene count	uncorrected p-value
GO:0035225	determination of genital disc primordium	8	0.736005	3.30945e-08
GO:0035215	genital disc development	8	1.03041	1.68935e-06
GO:0007438	oenocyte development	5	0.515204	3.96559e-05
Cluster 13: spliceosome assembly
observed gene count: 39
expected gene count: 11.040079496522
uncorrected p-value: 1.85007794096123e-12
GO ID	term	observed gene count	expected gene count	uncorrected p-value
GO:0006366	transcription from RNA polymerase II promoter	14	3.53283	5.67099e-06
GO:0006351	transcription, DNA-dependent	11	3.31202	0.000323025
GO:0006367	transcription initiation from RNA polymerase II promoter	13	4.71043	0.000666986
GO:0006376	mRNA splice site selection	4	0.515204	0.000852767
GO:0000245	spliceosome assembly	3	0.515204	0.0111128
Cluster 14: salivary gland boundary specification
observed gene count: 18
expected gene count: 2.7232196091421
uncorrected p-value: 1.61863567136534e-11
GO ID	term	observed gene count	expected gene count	uncorrected p-value
GO:0007432	salivary gland boundary specification	10	0.956807	1.04575e-09
GO:0016360	sensory organ precursor cell fate determination	8	1.54561	7.17884e-05
Cluster 15: gliogenesis
observed gene count: 21
expected gene count: 3.90082808877112
uncorrected p-value: 4.34511169764856e-11
GO ID	term	observed gene count	expected gene count	uncorrected p-value
GO:0019991	septate junction assembly	12	1.98721	1.46695e-07
GO:0010001	glial cell differentiation	6	0.809606	5.24941e-05
GO:0021782	glial cell development	3	0.515204	0.0111128
GO:0042063	gliogenesis	2	0.441603	0.0665431
GO:0007043	cell-cell junction assembly	2	0.441603	0.0665431
GO:0045216	cell-cell junction organization	1	0.220802	0.204962
Cluster 16: synaptogenesis
observed gene count: 36
expected gene count: 11.1136800264988
uncorrected p-value: 1.90882052041405e-10
GO ID	term	observed gene count	expected gene count	uncorrected p-value
GO:0007519	skeletal muscle tissue development	6	1.03041	0.000281375
GO:0007517	muscle organ development	13	4.63683	0.000569206
GO:0048747	muscle fiber development	4	0.588804	0.00160622
GO:0007416	synaptogenesis	6	1.84001	0.00824713
GO:0050808	synapse organization	4	0.883206	0.00894989
GO:0007528	neuromuscular junction development	7	2.87042	0.0221409
GO:0060537	muscle tissue development	1	0.294402	0.263489
Cluster 17: hemopoiesis
observed gene count: 20
expected gene count: 3.8272275587943
uncorrected p-value: 2.38833811977772e-10
GO ID	term	observed gene count	expected gene count	uncorrected p-value
GO:0048542	lymph gland development	11	1.32481	6.4331e-09
GO:0007516	hemocyte development	5	0.441603	1.20659e-05
GO:0042690	negative regulation of crystal cell differentiation	4	0.294402	2.91977e-05
GO:0042688	crystal cell differentiation	5	0.515204	3.96559e-05
GO:0035167	larval lymph gland hemopoiesis	5	0.588804	9.93135e-05
GO:0035165	embryonic crystal cell differentiation	3	0.294402	0.00150321
GO:0045610	regulation of hemocyte differentiation	5	0.956807	0.00167054
GO:0035162	embryonic hemopoiesis	3	0.368003	0.00355189
GO:0042689	regulation of crystal cell differentiation	2	0.147201	0.00541252
GO:0030097	hemopoiesis	5	1.54561	0.0161398
GO:0045611	negative regulation of hemocyte differentiation	1	0.0736005	0.0736005
GO:0035168	larval lymph gland hemocyte differentiation	1	0.147201	0.141789
GO:0042386	hemocyte differentiation	1	0.515204	0.414482
Cluster 18: gonad development
observed gene count: 27
expected gene count: 6.84484928784366
uncorrected p-value: 3.23737402207112e-10
GO ID	term	observed gene count	expected gene count	uncorrected p-value
GO:0008406	gonad development	16	2.42882	2.35301e-10
GO:0007280	pole cell migration	7	1.69281	0.000986524
GO:0008354	germ cell migration	8	2.50242	0.00271607
GO:0007548	sex differentiation	5	1.17761	0.0047087
GO:0007506	gonadal mesoderm development	3	0.588804	0.0168167
GO:0008585	female gonad development	3	0.809606	0.0419807
GO:0046660	female sex differentiation	1	0.294402	0.263489
Cluster 19: border follicle cell migration
observed gene count: 33
expected gene count: 10.0096720768466
uncorrected p-value: 6.66953678058427e-10
GO ID	term	observed gene count	expected gene count	uncorrected p-value
GO:0007298	border follicle cell migration	22	6.84485	7.40992e-07
GO:0030707	ovarian follicle cell development	15	3.97443	5.16401e-06
GO:0007297	ovarian follicle cell migration	2	0.809606	0.191736
Cluster 20: myoblast fusion
observed gene count: 16
expected gene count: 2.64961907916529
uncorrected p-value: 1.19273065207276e-09
GO ID	term	observed gene count	expected gene count	uncorrected p-value
GO:0007520	myoblast fusion	14	2.20802	6.00318e-09
GO:0007519	skeletal muscle tissue development	6	1.03041	0.000281375
Cluster 21: ommatidial rotation
observed gene count: 27
expected gene count: 7.80165617754223
uncorrected p-value: 7.69369573369912e-09
GO ID	term	observed gene count	expected gene count	uncorrected p-value
GO:0016318	ommatidial rotation	11	2.06081	2.18163e-06
GO:0042067	establishment of ommatidial polarity	11	2.13442	3.28181e-06
GO:0001736	establishment of planar polarity	10	2.20802	3.44544e-05
GO:0007164	establishment of tissue polarity	5	0.515204	3.96559e-05
GO:0007163	establishment or maintenance of cell polarity	9	2.35522	0.000365564
GO:0001738	morphogenesis of a polarized epithelium	6	1.17761	0.000660147
GO:0002009	morphogenesis of an epithelium	4	1.84001	0.107549
Cluster 22: leg disc development
observed gene count: 21
expected gene count: 5.00483603842332
uncorrected p-value: 8.81466775583811e-09
GO ID	term	observed gene count	expected gene count	uncorrected p-value
GO:0007474	imaginal disc-derived wing vein specification	13	3.16482	7.88917e-06
GO:0007479	leg disc proximal/distal pattern formation	6	1.17761	0.000660147
GO:0007473	wing disc proximal/distal pattern formation	3	0.441603	0.00671564
GO:0035218	leg disc development	3	0.588804	0.0168167
GO:0035309	wing and notum subfield formation	2	0.441603	0.0665431
GO:0035223	leg disc pattern formation	1	0.147201	0.141789
GO:0007449	proximal/distal pattern formation, imaginal disc	1	0.220802	0.204962
Cluster 23: midgut development
observed gene count: 19
expected gene count: 4.48963232858562
uncorrected p-value: 3.84264716021908e-08
GO ID	term	observed gene count	expected gene count	uncorrected p-value
GO:0007494	midgut development	10	2.20802	3.44544e-05
GO:0007379	segment specification	8	1.47201	4.74949e-05
GO:0007384	specification of segmental identity, thorax	3	0.220802	0.0003977
GO:0007385	specification of segmental identity, abdomen	4	0.515204	0.000852767
GO:0035290	trunk segmentation	3	0.736005	0.0322581
GO:0035292	specification of segmental identity, trunk	1	0.0736005	0.0736005
Cluster 24: cell division
observed gene count: 24
expected gene count: 7.0656508777741
uncorrected p-value: 7.64658760818848e-08
GO ID	term	observed gene count	expected gene count	uncorrected p-value
GO:0030718	germ-line stem cell maintenance	11	2.72322	4.69132e-05
GO:0008356	asymmetric cell division	8	1.76641	0.000212639
GO:0007179	transforming growth factor beta receptor signaling pathway	7	1.54561	0.000532936
GO:0030509	BMP signaling pathway	4	0.588804	0.00160622
GO:0042078	germ-line stem cell division	6	1.54561	0.00325364
GO:0051301	cell division	1	0.220802	0.204962
GO:0045596	negative regulation of cell differentiation	1	0.294402	0.263489
GO:0017145	stem cell division	1	0.368003	0.317711
GO:0048863	stem cell differentiation	1	0.368003	0.317711
GO:0019827	stem cell maintenance	1	0.515204	0.414482
Cluster 25: stem cell division
observed gene count: 20
expected gene count: 5.22563762835376
uncorrected p-value: 1.10814958176661e-07
GO ID	term	observed gene count	expected gene count	uncorrected p-value
GO:0055059	asymmetric neuroblast division	10	2.20802	3.44544e-05
GO:0008105	asymmetric protein localization	6	1.17761	0.000660147
GO:0045167	asymmetric protein localization involved in cell fate determination	5	1.03041	0.0024423
GO:0048103	somatic stem cell division	4	0.662405	0.00272329
GO:0045176	apical protein localization	4	0.662405	0.00272329
GO:0007405	neuroblast proliferation	5	1.47201	0.0130716
GO:0040001	establishment of mitotic spindle localization	2	0.662405	0.138058
GO:0017145	stem cell division	1	0.368003	0.317711
Cluster 26: regulation of cell fate specification
observed gene count: 9
expected gene count: 1.1040079496522
uncorrected p-value: 2.048146239632e-07
GO ID	term	observed gene count	expected gene count	uncorrected p-value
GO:0042659	regulation of cell fate specification	5	0.662405	0.000209882
GO:0009996	negative regulation of cell fate specification	3	0.368003	0.00355189
GO:0051890	regulation of cardioblast differentiation	1	0.0736005	0.0736005
GO:0042686	regulation of cardioblast cell fate specification	1	0.0736005	0.0736005
Cluster 27: segment specification
observed gene count: 18
expected gene count: 4.56323285856244
uncorrected p-value: 2.88690595529485e-07
GO ID	term	observed gene count	expected gene count	uncorrected p-value
GO:0007379	segment specification	8	1.47201	4.74949e-05
GO:0035277	spiracle morphogenesis, open tracheal system	7	1.47201	0.00037922
GO:0035288	anterior head segmentation	4	0.515204	0.000852767
GO:0007418	ventral midline development	3	0.662405	0.0238635
GO:0035289	posterior head segmentation	2	0.736005	0.164508
GO:0007380	specification of segmental identity, head	2	0.809606	0.191736
Cluster 28: ommatidial rotation
observed gene count: 17
expected gene count: 4.26883073865518
uncorrected p-value: 5.29778928106493e-07
GO ID	term	observed gene count	expected gene count	uncorrected p-value
GO:0016318	ommatidial rotation	11	2.06081	2.18163e-06
GO:0007156	homophilic cell adhesion	11	2.28162	7.00286e-06
GO:0016339	calcium-dependent cell-cell adhesion	5	1.69281	0.0236292
Cluster 29: regulation of tube size, open tracheal system
observed gene count: 12
expected gene count: 2.20801589930441
uncorrected p-value: 5.931071623334e-07
GO ID	term	observed gene count	expected gene count	uncorrected p-value
GO:0035151	regulation of tube size, open tracheal system	7	1.32481	0.0001774
GO:0035152	regulation of tube architecture, open tracheal system	5	0.956807	0.00167054
Cluster 30: regulation of nuclear mRNA splicing, via spliceosome
observed gene count: 17
expected gene count: 4.342431268632
uncorrected p-value: 6.93639510168078e-07
GO ID	term	observed gene count	expected gene count	uncorrected p-value
GO:0000381	regulation of alternative nuclear mRNA splicing, via spliceosome	16	3.75363	4.07575e-07
GO:0048024	regulation of nuclear mRNA splicing, via spliceosome	2	0.588804	0.112681
Cluster 31: regulation of cell adhesion
observed gene count: 11
expected gene count: 1.91361377939715
uncorrected p-value: 9.00458436043575e-07
GO ID	term	observed gene count	expected gene count	uncorrected p-value
GO:0035050	embryonic heart tube development	7	1.25121	0.000115741
GO:0030155	regulation of cell adhesion	3	0.294402	0.00150321
GO:0022409	positive regulation of cell-cell adhesion	2	0.441603	0.0665431
GO:0022407	regulation of cell-cell adhesion	1	0.0736005	0.0736005
Cluster 32: wing disc pattern formation
observed gene count: 16
expected gene count: 3.97442861874793
uncorrected p-value: 9.70840618863038e-07
GO ID	term	observed gene count	expected gene count	uncorrected p-value
GO:0035222	wing disc pattern formation	7	1.03041	2.48656e-05
GO:0007450	dorsal/ventral pattern formation, imaginal disc	5	0.736005	0.000394314
GO:0009953	dorsal/ventral pattern formation	7	1.98721	0.00275754
GO:0007447	imaginal disc pattern formation	4	0.809606	0.00633125
Cluster 33: genital disc sexually dimorphic development
observed gene count: 10
expected gene count: 1.6192116594899
uncorrected p-value: 1.27778258452826e-06
GO ID	term	observed gene count	expected gene count	uncorrected p-value
GO:0007448	anterior/posterior pattern formation, imaginal disc	6	0.588804	3.86129e-06
GO:0035224	genital disc anterior/posterior pattern formation	5	0.588804	9.93135e-05
GO:0048100	wing disc anterior/posterior pattern formation	5	0.883206	0.00109396
GO:0035263	genital disc sexually dimorphic development	3	0.368003	0.00355189
Cluster 34: cardioblast differentiation
observed gene count: 8
expected gene count: 1.03040741967539
uncorrected p-value: 1.68934993037713e-06
GO ID	term	observed gene count	expected gene count	uncorrected p-value
GO:0035051	cardiac cell differentiation	5	0.515204	3.96559e-05
GO:0010002	cardioblast differentiation	4	0.662405	0.00272329
Cluster 35: neuroblast fate determination
observed gene count: 11
expected gene count: 2.06081483935078
uncorrected p-value: 2.18163062218868e-06
GO ID	term	observed gene count	expected gene count	uncorrected p-value
GO:0007400	neuroblast fate determination	11	1.98721	1.41867e-06
Cluster 36: neuron fate commitment
observed gene count: 16
expected gene count: 4.342431268632
uncorrected p-value: 3.55629449309366e-06
GO ID	term	observed gene count	expected gene count	uncorrected p-value
GO:0007464	R3/R4 cell fate commitment	7	1.17761	7.26916e-05
GO:0046552	photoreceptor cell fate commitment	2	0.147201	0.00541252
GO:0001751	compound eye photoreceptor cell differentiation	6	1.84001	0.00824713
GO:0048056	R3/R4 cell differentiation	1	0.0736005	0.0736005
GO:0001754	eye photoreceptor cell differentiation	1	0.368003	0.317711
GO:0048663	neuron fate commitment	1	0.441603	0.367944
Cluster 37: segmentation
observed gene count: 25
expected gene count: 9.20006624710169
uncorrected p-value: 3.7086884186976e-06
GO ID	term	observed gene count	expected gene count	uncorrected p-value
GO:0009952	anterior/posterior pattern formation	7	1.32481	0.0001774
GO:0007389	pattern specification process	6	1.54561	0.00325364
GO:0009798	axis specification	3	0.588804	0.0168167
GO:0008595	determination of anterior/posterior axis, embryo	7	2.72322	0.01683
GO:0009880	embryonic pattern specification	4	1.61921	0.0738088
GO:0009948	anterior/posterior axis specification	2	0.515204	0.0887152
GO:0007350	blastoderm segmentation	3	1.61921	0.217521
GO:0035282	segmentation	1	1.03041	0.657257
Cluster 38: gastrulation
observed gene count: 15
expected gene count: 3.90082808877112
uncorrected p-value: 3.99923819178508e-06
GO ID	term	observed gene count	expected gene count	uncorrected p-value
GO:0035050	embryonic heart tube development	7	1.25121	0.000115741
GO:0007501	mesodermal cell fate specification	3	0.809606	0.0419807
GO:0048332	mesoderm morphogenesis	1	0.0736005	0.0736005
GO:0007369	gastrulation	4	1.84001	0.107549
GO:0001710	mesodermal cell fate commitment	1	0.441603	0.367944
Cluster 39: cell cycle
observed gene count: 51
expected gene count: 26.7169923815833
uncorrected p-value: 5.7737817739673e-06
GO ID	term	observed gene count	expected gene count	uncorrected p-value
GO:0007052	mitotic spindle organization	31	13.8369	1.79407e-05
GO:0000022	mitotic spindle elongation	15	5.81444	0.000566454
GO:0007049	cell cycle	7	2.72322	0.01683
GO:0007010	cytoskeleton organization	6	3.16482	0.0932063
GO:0007051	spindle organization	2	0.809606	0.191736
GO:0000278	mitotic cell cycle	4	2.35522	0.2065
GO:0000226	microtubule cytoskeleton organization	2	2.28162	0.676567
GO:0007017	microtubule-based process	2	3.45922	0.870161
Cluster 40: head involution
observed gene count: 21
expected gene count: 7.28645246770454
uncorrected p-value: 8.40038429612625e-06
GO ID	term	observed gene count	expected gene count	uncorrected p-value
GO:0008258	head involution	13	3.01762	4.36502e-06
GO:0046665	amnioserosa maintenance	4	0.368003	0.000137421
GO:0007390	germ-band shortening	7	1.39841	0.000263116
GO:0007362	terminal region determination	6	1.98721	0.0121561
GO:0008293	torso signaling pathway	6	2.50242	0.0357031
GO:0035160	maintenance of epithelial integrity, open tracheal system	3	0.883206	0.0529909
Cluster 41: ectoderm development
observed gene count: 21
expected gene count: 7.50725405763498
uncorrected p-value: 1.36734877727303e-05
GO ID	term	observed gene count	expected gene count	uncorrected p-value
GO:0007398	ectoderm development	8	1.69281	0.000151472
GO:0045198	establishment of epithelial cell apical/basal polarity	5	0.662405	0.000209882
GO:0035320	imaginal disc-derived wing hair site selection	3	0.220802	0.0003977
GO:0030010	establishment of cell polarity	3	0.368003	0.00355189
GO:0001737	establishment of imaginal disc-derived wing hair orientation	6	1.84001	0.00824713
GO:0045197	establishment or maintenance of epithelial cell apical/basal polarity	4	1.25121	0.032072
GO:0035089	establishment of apical/basal cell polarity	1	0.147201	0.141789
GO:0008544	epidermis development	2	1.03041	0.27568
GO:0035088	establishment or maintenance of apical/basal cell polarity	1	0.883206	0.600581
GO:0035317	imaginal disc-derived wing hair organization	1	1.32481	0.747641
Cluster 42: endocytosis
observed gene count: 45
expected gene count: 23.7729711825108
uncorrected p-value: 2.49926274379566e-05
GO ID	term	observed gene count	expected gene count	uncorrected p-value
GO:0006911	phagocytosis, engulfment	28	13.1745	0.000116172
GO:0006909	phagocytosis	5	1.32481	0.00816606
GO:0016044	membrane organization	3	0.956807	0.0652327
GO:0006897	endocytosis	5	3.09122	0.193839
GO:0016192	vesicle-mediated transport	7	6.32965	0.448582
Cluster 43: startle response
observed gene count: 8
expected gene count: 1.39841006955946
uncorrected p-value: 3.04575131117172e-05
GO ID	term	observed gene count	expected gene count	uncorrected p-value
GO:0048854	brain morphogenesis	8	1.17761	6.33443e-06
GO:0001964	startle response	7	1.03041	2.48656e-05
GO:0031987	locomotion involved in locomotory behavior	7	1.17761	7.26916e-05
Cluster 44: foregut morphogenesis
observed gene count: 14
expected gene count: 4.12162967870156
uncorrected p-value: 3.91621308265151e-05
GO ID	term	observed gene count	expected gene count	uncorrected p-value
GO:0007440	foregut morphogenesis	4	0.809606	0.00633125
GO:0007473	wing disc proximal/distal pattern formation	3	0.441603	0.00671564
GO:0007443	Malpighian tubule morphogenesis	7	2.35522	0.00757441
GO:0007442	hindgut morphogenesis	5	1.39841	0.0104228
GO:0007439	ectodermal gut development	1	0.0736005	0.0736005
GO:0048546	digestive tract morphogenesis	1	0.147201	0.141789
GO:0048619	embryonic hindgut morphogenesis	1	0.368003	0.317711
Cluster 45: growth
observed gene count: 18
expected gene count: 6.47684663795959
uncorrected p-value: 6.06127822700468e-05
GO ID	term	observed gene count	expected gene count	uncorrected p-value
GO:0007446	imaginal disc growth	7	1.25121	0.000115741
GO:0007473	wing disc proximal/distal pattern formation	3	0.441603	0.00671564
GO:0048675	axon extension	5	1.47201	0.0130716
GO:0048588	developmental cell growth	1	0.0736005	0.0736005
GO:0016049	cell growth	3	1.03041	0.0786373
GO:0007449	proximal/distal pattern formation, imaginal disc	1	0.220802	0.204962
GO:0040007	growth	2	1.54561	0.464296
GO:0008361	regulation of cell size	1	1.10401	0.682507
Cluster 46: adult behavior
observed gene count: 15
expected gene count: 4.85763497846969
uncorrected p-value: 6.94211547716539e-05
GO ID	term	observed gene count	expected gene count	uncorrected p-value
GO:0046845	branched duct epithelial cell fate determination, open tracheal system	7	0.662405	3.62583e-07
GO:0048149	behavioral response to ethanol	9	3.53283	0.00756305
GO:0030534	adult behavior	2	0.441603	0.0665431
Cluster 47: genitalia development
observed gene count: 6
expected gene count: 0.883206359721762
uncorrected p-value: 9.84432192105496e-05
GO ID	term	observed gene count	expected gene count	uncorrected p-value
GO:0007485	imaginal disc-derived male genitalia development	3	0.515204	0.0111128
GO:0048806	genitalia development	2	0.294402	0.0293811
GO:0007484	imaginal disc-derived genitalia development	1	0.0736005	0.0736005
Cluster 48: regulation of neurogenesis
observed gene count: 10
expected gene count: 2.50241801921166
uncorrected p-value: 0.00011468067175014
GO ID	term	observed gene count	expected gene count	uncorrected p-value
GO:0051960	regulation of nervous system development	3	0.294402	0.00150321
GO:0050767	regulation of neurogenesis	3	0.588804	0.0168167
GO:0050768	negative regulation of neurogenesis	2	0.294402	0.0293811
GO:0045664	regulation of neuron differentiation	1	0.294402	0.263489
GO:0050770	regulation of axonogenesis	2	1.17761	0.331643
Cluster 49: dorsal appendage formation
observed gene count: 23
expected gene count: 10.0832726068235
uncorrected p-value: 0.000158442732419187
GO ID	term	observed gene count	expected gene count	uncorrected p-value
GO:0030707	ovarian follicle cell development	15	3.97443	5.16401e-06
GO:0046843	dorsal appendage formation	8	2.50242	0.00271607
GO:0007307	eggshell chorion gene amplification	5	1.32481	0.00816606
GO:0007304	chorion-containing eggshell formation	3	2.35522	0.422157
Cluster 50: sex determination
observed gene count: 8
expected gene count: 1.76641271944352
uncorrected p-value: 0.000212638633261506
GO ID	term	observed gene count	expected gene count	uncorrected p-value
GO:0007530	sex determination	7	1.32481	0.0001774
GO:0007541	sex determination, primary response to X:A ratio	3	0.368003	0.00355189
GO:0019101	female somatic sex determination	3	0.368003	0.00355189
GO:0007539	primary sex determination, soma	2	0.220802	0.0154422
GO:0030237	female sex determination	2	0.220802	0.0154422
GO:0019099	female germ-line sex determination	2	0.294402	0.0293811
GO:0018993	somatic sex determination	1	0.294402	0.263489
Cluster 51: germ-line stem cell division
observed gene count: 8
expected gene count: 1.76641271944352
uncorrected p-value: 0.000212638633261506
GO ID	term	observed gene count	expected gene count	uncorrected p-value
GO:0045705	negative regulation of salivary gland boundary specification	5	0.588804	9.93135e-05
GO:0042078	germ-line stem cell division	6	1.54561	0.00325364
Cluster 52: cell motion
observed gene count: 8
expected gene count: 1.91361377939715
uncorrected p-value: 0.000395691387873955
GO ID	term	observed gene count	expected gene count	uncorrected p-value
GO:0016477	cell migration	7	1.69281	0.000986524
GO:0006928	cell motion	2	0.294402	0.0293811
Cluster 53: leg disc development
observed gene count: 14
expected gene count: 5.22563762835376
uncorrected p-value: 0.000576112275942735
GO ID	term	observed gene count	expected gene count	uncorrected p-value
GO:0016348	imaginal disc-derived leg joint morphogenesis	4	0.809606	0.00633125
GO:0035218	leg disc development	3	0.588804	0.0168167
GO:0007480	imaginal disc-derived leg morphogenesis	9	4.04803	0.0181233
GO:0007478	leg disc morphogenesis	1	0.147201	0.141789
Cluster 54: regulation of R7 cell differentiation
observed gene count: 10
expected gene count: 3.09122225902617
uncorrected p-value: 0.000750266663186713
GO ID	term	observed gene count	expected gene count	uncorrected p-value
GO:0045678	positive regulation of R7 cell differentiation	4	0.368003	0.000137421
GO:0046580	negative regulation of Ras protein signal transduction	6	1.25121	0.000957097
GO:0045676	regulation of R7 cell differentiation	2	0.368003	0.0466006
GO:0046578	regulation of Ras protein signal transduction	1	0.441603	0.367944
Cluster 55: tRNA processing
observed gene count: 7
expected gene count: 1.76641271944352
uncorrected p-value: 0.00130518212227911
GO ID	term	observed gene count	expected gene count	uncorrected p-value
GO:0009451	RNA modification	2	0.220802	0.0154422
GO:0008033	tRNA processing	3	0.956807	0.0652327
GO:0006400	tRNA modification	2	0.515204	0.0887152
Cluster 56: cell adhesion
observed gene count: 20
expected gene count: 9.7888704869162
uncorrected p-value: 0.00171109730978274
GO ID	term	observed gene count	expected gene count	uncorrected p-value
GO:0016337	cell-cell adhesion	6	1.54561	0.00325364
GO:0007155	cell adhesion	16	8.75846	0.0136697
Cluster 57: apoptosis
observed gene count: 11
expected gene count: 4.19523020867837
uncorrected p-value: 0.00260778348794699
GO ID	term	observed gene count	expected gene count	uncorrected p-value
GO:0006915	apoptosis	9	3.23842	0.00416181
GO:0008219	cell death	3	0.809606	0.0419807
GO:0012501	programmed cell death	1	1.10401	0.682507
Cluster 58: RNA localization
observed gene count: 11
expected gene count: 4.19523020867837
uncorrected p-value: 0.00260778348794699
GO ID	term	observed gene count	expected gene count	uncorrected p-value
GO:0007314	oocyte anterior/posterior axis specification	5	1.76641	0.0280906
GO:0006403	RNA localization	1	0.220802	0.204962
GO:0008298	intracellular mRNA localization	3	1.69281	0.237493
GO:0008358	maternal determination of anterior/posterior axis, embryo	1	0.294402	0.263489
GO:0019094	pole plasm mRNA localization	1	0.515204	0.414482
GO:0007315	pole plasm assembly	1	1.17761	0.705898
Cluster 59: negative regulation of RNA splicing
observed gene count: 3
expected gene count: 0.368002649884068
uncorrected p-value: 0.0035518850205619
GO ID	term	observed gene count	expected gene count	uncorrected p-value
GO:0048025	negative regulation of nuclear mRNA splicing, via spliceosome	2	0.220802	0.0154422
GO:0033119	negative regulation of RNA splicing	1	0.147201	0.141789
Cluster 60: chromatin remodeling
observed gene count: 8
expected gene count: 2.64961907916529
uncorrected p-value: 0.00397137455834115
GO ID	term	observed gene count	expected gene count	uncorrected p-value
GO:0006338	chromatin remodeling	8	2.35522	0.00179408
Cluster 61: male gonad development
observed gene count: 4
expected gene count: 0.736005299768135
uncorrected p-value: 0.00427594294439189
GO ID	term	observed gene count	expected gene count	uncorrected p-value
GO:0008584	male gonad development	4	0.588804	0.00160622
Cluster 62: regulation of growth
observed gene count: 9
expected gene count: 3.38562437893342
uncorrected p-value: 0.00566783289217187
GO ID	term	observed gene count	expected gene count	uncorrected p-value
GO:0045570	regulation of imaginal disc growth	4	0.809606	0.00633125
GO:0046620	regulation of organ growth	4	1.17761	0.0260014
GO:0040008	regulation of growth	4	1.47201	0.0548531
Cluster 63: dorsal closure, leading edge cell fate determination
observed gene count: 4
expected gene count: 0.809605829744949
uncorrected p-value: 0.00633124509448625
GO ID	term	observed gene count	expected gene count	uncorrected p-value
GO:0007393	dorsal closure, leading edge cell fate determination	3	0.220802	0.0003977
GO:0007354	zygotic determination of anterior/posterior axis, embryo	2	0.588804	0.112681
Cluster 64: germ cell development
observed gene count: 16
expected gene count: 8.09605829744949
uncorrected p-value: 0.00656864534416052
GO ID	term	observed gene count	expected gene count	uncorrected p-value
GO:0007314	oocyte anterior/posterior axis specification	5	1.76641	0.0280906
GO:0007310	oocyte dorsal/ventral axis specification	4	1.54561	0.0639621
GO:0009950	dorsal/ventral axis specification	5	2.20802	0.0656559
GO:0007281	germ cell development	4	2.20802	0.175857
GO:0008358	maternal determination of anterior/posterior axis, embryo	1	0.294402	0.263489
GO:0007309	oocyte axis specification	2	1.10401	0.303765
Cluster 65: induction of apoptosis
observed gene count: 17
expected gene count: 8.90566412719444
uncorrected p-value: 0.00734916851055805
GO ID	term	observed gene count	expected gene count	uncorrected p-value
GO:0043066	negative regulation of apoptosis	8	3.82723	0.0350701
GO:0006917	induction of apoptosis	4	1.39841	0.0464968
GO:0010942	positive regulation of cell death	1	0.0736005	0.0736005
GO:0043065	positive regulation of apoptosis	2	0.662405	0.138058
GO:0043068	positive regulation of programmed cell death	1	0.368003	0.317711
GO:0043069	negative regulation of programmed cell death	1	0.515204	0.414482
GO:0042981	regulation of apoptosis	2	1.47201	0.438928
Cluster 66: centrosome cycle
observed gene count: 10
expected gene count: 4.19523020867837
uncorrected p-value: 0.00808257424507143
GO ID	term	observed gene count	expected gene count	uncorrected p-value
GO:0051297	centrosome organization	10	3.75363	0.00356531
GO:0007098	centrosome cycle	1	0.662405	0.497539
Cluster 67: regulation of cell growth
observed gene count: 11
expected gene count: 4.85763497846969
uncorrected p-value: 0.00829876888375467
GO ID	term	observed gene count	expected gene count	uncorrected p-value
GO:0045927	positive regulation of growth	3	0.809606	0.0419807
GO:0030307	positive regulation of cell growth	4	1.39841	0.0464968
GO:0040018	positive regulation of multicellular organism growth	4	1.61921	0.0738088
GO:0040014	regulation of multicellular organism growth	3	1.10401	0.0931271
GO:0045793	positive regulation of cell size	3	1.54561	0.197924
GO:0001558	regulation of cell growth	2	1.17761	0.331643
Cluster 68: oogenesis
observed gene count: 47
expected gene count: 33.2674395495197
uncorrected p-value: 0.0101734441631504
GO ID	term	observed gene count	expected gene count	uncorrected p-value
GO:0048477	oogenesis	34	14.6465	3.21514e-06
GO:0030707	ovarian follicle cell development	15	3.97443	5.16401e-06
GO:0032504	multicellular organism reproduction	4	16.0449	0.999946
Cluster 69: actin filament organization
observed gene count: 15
expected gene count: 7.80165617754223
uncorrected p-value: 0.0106692052392234
GO ID	term	observed gene count	expected gene count	uncorrected p-value
GO:0030036	actin cytoskeleton organization	10	3.68003	0.00306411
GO:0007015	actin filament organization	6	5.07844	0.398253
Cluster 70: female meiosis
observed gene count: 14
expected gene count: 7.36005299768135
uncorrected p-value: 0.0145887531159256
GO ID	term	observed gene count	expected gene count	uncorrected p-value
GO:0007059	chromosome segregation	8	2.42882	0.00221774
GO:0051321	meiotic cell cycle	1	0.0736005	0.0736005
GO:0016321	female meiosis chromosome segregation	4	2.28162	0.190983
GO:0007143	female meiosis	1	1.84001	0.852337
Cluster 71: retinal cell programmed cell death
observed gene count: 4
expected gene count: 1.03040741967539
uncorrected p-value: 0.0160822885698622
GO ID	term	observed gene count	expected gene count	uncorrected p-value
GO:0046666	retinal cell programmed cell death	3	0.294402	0.00150321
GO:0046667	compound eye retinal cell programmed cell death	4	0.736005	0.00427594
Cluster 72: regulation of mitosis
observed gene count: 17
expected gene count: 9.71526995693938
uncorrected p-value: 0.016803608064197
GO ID	term	observed gene count	expected gene count	uncorrected p-value
GO:0051726	regulation of cell cycle	10	5.96164	0.0729422
GO:0007088	regulation of mitosis	4	1.76641	0.0956294
GO:0007346	regulation of mitotic cell cycle	4	2.28162	0.190983
Cluster 73: pigment metabolic process
observed gene count: 7
expected gene count: 2.7232196091421
uncorrected p-value: 0.0168300133488566
GO ID	term	observed gene count	expected gene count	uncorrected p-value
GO:0042440	pigment metabolic process	2	0.294402	0.0293811
GO:0006726	eye pigment biosynthetic process	3	0.956807	0.0652327
GO:0006727	ommochrome biosynthetic process	3	1.25121	0.12502
GO:0048066	pigmentation during development	2	0.956807	0.247531
Cluster 74: RNA localization
observed gene count: 8
expected gene count: 3.38562437893342
uncorrected p-value: 0.0178829303386667
GO ID	term	observed gene count	expected gene count	uncorrected p-value
GO:0045995	regulation of embryonic development	2	0.220802	0.0154422
GO:0006403	RNA localization	1	0.220802	0.204962
GO:0008298	intracellular mRNA localization	3	1.69281	0.237493
GO:0007317	regulation of pole plasm oskar mRNA localization	3	1.84001	0.278243
Cluster 75: regulation of synaptogenesis
observed gene count: 9
expected gene count: 4.04802914872474
uncorrected p-value: 0.0181232797066236
GO ID	term	observed gene count	expected gene count	uncorrected p-value
GO:0016202	regulation of striated muscle tissue development	4	0.515204	0.000852767
GO:0051963	regulation of synaptogenesis	2	0.147201	0.00541252
GO:0050807	regulation of synapse organization	2	0.736005	0.164508
GO:0008582	regulation of synaptic growth at neuromuscular junction	2	1.69281	0.512924
GO:0050803	regulation of synapse structure and activity	1	1.03041	0.657257
Cluster 76: phosphorylation
observed gene count: 28
expected gene count: 19.0625372639947
uncorrected p-value: 0.0261054625803032
GO ID	term	observed gene count	expected gene count	uncorrected p-value
GO:0006468	protein amino acid phosphorylation	26	17.1489	0.0220021
GO:0016310	phosphorylation	2	1.91361	0.580185
Cluster 77: regulation of phosphorylation
observed gene count: 5
expected gene count: 1.84001324942034
uncorrected p-value: 0.0330515207416733
GO ID	term	observed gene count	expected gene count	uncorrected p-value
GO:0042325	regulation of phosphorylation	3	0.588804	0.0168167
GO:0045860	positive regulation of protein kinase activity	1	0.220802	0.204962
GO:0045859	regulation of protein kinase activity	1	0.956807	0.630002
Cluster 78: neuron recognition
observed gene count: 6
expected gene count: 2.50241801921166
uncorrected p-value: 0.0357031477291395
GO ID	term	observed gene count	expected gene count	uncorrected p-value
GO:0008038	neuron recognition	3	0.515204	0.0111128
GO:0016199	axon midline choice point recognition	5	1.84001	0.0330515
Cluster 79: immune response
observed gene count: 24
expected gene count: 16.3393176548526
uncorrected p-value: 0.0372740487807719
GO ID	term	observed gene count	expected gene count	uncorrected p-value
GO:0006952	defense response	13	7.43365	0.03383
GO:0050829	defense response to Gram-negative bacterium	7	3.75363	0.0784107
GO:0006955	immune response	6	3.68003	0.159399
GO:0045087	innate immune response	4	2.87042	0.322462
GO:0042742	defense response to bacterium	5	4.19523	0.41068
GO:0009617	response to bacterium	2	1.69281	0.512924
Cluster 80: protein transport
observed gene count: 22
expected gene count: 14.8673070553163
uncorrected p-value: 0.0416929638020551
GO ID	term	observed gene count	expected gene count	uncorrected p-value
GO:0008104	protein localization	8	3.31202	0.0157586
GO:0046907	intracellular transport	3	1.03041	0.0786373
GO:0006886	intracellular protein transport	9	5.52004	0.0986417
GO:0034613	cellular protein localization	1	0.147201	0.141789
GO:0015031	protein transport	3	4.93124	0.879625
Cluster 81: regulation of actin filament polymerization
observed gene count: 5
expected gene count: 1.98721430937396
uncorrected p-value: 0.0445165724483953
GO ID	term	observed gene count	expected gene count	uncorrected p-value
GO:0032956	regulation of actin cytoskeleton organization	2	0.515204	0.0887152
GO:0008064	regulation of actin polymerization or depolymerization	2	0.588804	0.112681
GO:0030833	regulation of actin filament polymerization	1	0.441603	0.367944
Cluster 82: ovarian follicle cell stalk formation
observed gene count: 7
expected gene count: 3.31202384895661
uncorrected p-value: 0.0447184295492554
GO ID	term	observed gene count	expected gene count	uncorrected p-value
GO:0030708	germarium-derived female germ-line cyst encapsulation	4	0.736005	0.00427594
GO:0030713	ovarian follicle cell stalk formation	5	1.25121	0.00627186
GO:0007293	germarium-derived egg chamber formation	2	1.47201	0.438928
GO:0016333	morphogenesis of follicular epithelium	1	0.736005	0.534542
Cluster 83: JNK cascade
observed gene count: 6
expected gene count: 2.64961907916529
uncorrected p-value: 0.0456987107619854
GO ID	term	observed gene count	expected gene count	uncorrected p-value
GO:0007254	JNK cascade	6	1.84001	0.00824713
GO:0000165	MAPKKK cascade	2	0.736005	0.164508
Cluster 84: chemotaxis
observed gene count: 2
expected gene count: 0.368002649884068
uncorrected p-value: 0.0466006065065782
GO ID	term	observed gene count	expected gene count	uncorrected p-value
GO:0050919	negative chemotaxis	1	0.0736005	0.0736005
GO:0006935	chemotaxis	1	0.294402	0.263489
Cluster 85: gene silencing
observed gene count: 7
expected gene count: 3.53282543888705
uncorrected p-value: 0.0601200610810732
GO ID	term	observed gene count	expected gene count	uncorrected p-value
GO:0006342	chromatin silencing	6	2.72322	0.0512862
GO:0016458	gene silencing	3	1.17761	0.108618
Cluster 86: mitosis
observed gene count: 15
expected gene count: 9.93607154686982
uncorrected p-value: 0.0714405226308254
GO ID	term	observed gene count	expected gene count	uncorrected p-value
GO:0007080	mitotic metaphase plate congression	4	0.883206	0.00894989
GO:0051310	metaphase plate congression	1	0.220802	0.204962
GO:0000087	M phase of mitotic cell cycle	1	0.294402	0.263489
GO:0000819	sister chromatid segregation	1	0.368003	0.317711
GO:0007067	mitosis	8	7.06565	0.411372
GO:0000280	nuclear division	1	0.515204	0.414482
GO:0000070	mitotic sister chromatid segregation	1	1.69281	0.8279
Cluster 87: methylation
observed gene count: 5
expected gene count: 2.42881748923485
uncorrected p-value: 0.0914909761550671
GO ID	term	observed gene count	expected gene count	uncorrected p-value
GO:0001510	RNA methylation	3	0.588804	0.0168167
GO:0032259	methylation	2	0.662405	0.138058
Cluster 88: nuclear export
observed gene count: 6
expected gene count: 3.23842331897979
uncorrected p-value: 0.101573529435339
GO ID	term	observed gene count	expected gene count	uncorrected p-value
GO:0051168	nuclear export	2	0.441603	0.0665431
GO:0006406	mRNA export from nucleus	3	1.39841	0.160196
GO:0006403	RNA localization	1	0.220802	0.204962
Cluster 89: regulation of JNK cascade
observed gene count: 4
expected gene count: 1.84001324942034
uncorrected p-value: 0.10754898585451
GO ID	term	observed gene count	expected gene count	uncorrected p-value
GO:0046529	imaginal disc fusion, thorax closure	3	1.03041	0.0786373
GO:0046328	regulation of JNK cascade	1	0.662405	0.497539
Cluster 90: gene silencing
observed gene count: 7
expected gene count: 4.41603179860881
uncorrected p-value: 0.150237477601926
GO ID	term	observed gene count	expected gene count	uncorrected p-value
GO:0016458	gene silencing	3	1.17761	0.108618
GO:0016246	RNA interference	3	1.84001	0.278243
GO:0035195	gene silencing by miRNA	2	1.61921	0.488974
Cluster 91: DNA repair
observed gene count: 14
expected gene count: 10.9664789665452
uncorrected p-value: 0.20733577116873
GO ID	term	observed gene count	expected gene count	uncorrected p-value
GO:0006281	DNA repair	8	4.19523	0.0559827
GO:0006974	response to DNA damage stimulus	8	6.99205	0.399942
Cluster 92: memory
observed gene count: 11
expected gene count: 8.39046041735674
uncorrected p-value: 0.217146492287307
GO ID	term	observed gene count	expected gene count	uncorrected p-value
GO:0007611	learning or memory	5	2.87042	0.156082
GO:0008355	olfactory learning	6	3.97443	0.204296
GO:0007635	chemosensory behavior	1	0.220802	0.204962
GO:0007613	memory	2	1.32481	0.386312
GO:0042048	olfactory behavior	4	3.16482	0.391
GO:0007612	learning	1	0.956807	0.630002
Cluster 93: spermatogenesis
observed gene count: 12
expected gene count: 9.64166942696257
uncorrected p-value: 0.256776050410866
GO ID	term	observed gene count	expected gene count	uncorrected p-value
GO:0007286	spermatid development	5	3.01762	0.180909
GO:0007283	spermatogenesis	7	6.99205	0.555236
Cluster 94: visual behavior
observed gene count: 4
expected gene count: 2.79682013911891
uncorrected p-value: 0.305396901184623
GO ID	term	observed gene count	expected gene count	uncorrected p-value
GO:0007632	visual behavior	3	1.17761	0.108618
GO:0009416	response to light stimulus	1	1.25121	0.727567
Cluster 95: vacuole organization
observed gene count: 4
expected gene count: 3.01762172904935
uncorrected p-value: 0.356743554147659
GO ID	term	observed gene count	expected gene count	uncorrected p-value
GO:0007033	vacuole organization	1	0.0736005	0.0736005
GO:0010507	negative regulation of autophagy	1	0.515204	0.414482
GO:0007040	lysosome organization	1	0.809606	0.568823
GO:0010506	regulation of autophagy	1	1.61921	0.814205
Cluster 96: response to heat
observed gene count: 6
expected gene count: 5.07843656840013
uncorrected p-value: 0.398253194083554
GO ID	term	observed gene count	expected gene count	uncorrected p-value
GO:0009408	response to heat	6	4.93124	0.371361
Cluster 97: negative regulation of translation
observed gene count: 3
expected gene count: 2.35521695925803
uncorrected p-value: 0.42215698033128
GO ID	term	observed gene count	expected gene count	uncorrected p-value
GO:0017148	negative regulation of translation	3	1.61921	0.217521
Cluster 98: courtship behavior
observed gene count: 5
expected gene count: 4.56323285856244
uncorrected p-value: 0.484098365337736
GO ID	term	observed gene count	expected gene count	uncorrected p-value
GO:0007619	courtship behavior	4	1.91361	0.120099
GO:0008049	male courtship behavior	4	2.57602	0.254958
Cluster 99: determination of adult life span
observed gene count: 11
expected gene count: 10.672076846638
uncorrected p-value: 0.503949512510539
GO ID	term	observed gene count	expected gene count	uncorrected p-value
GO:0008340	determination of adult life span	11	10.5985	0.494534
Cluster 100: protein ubiquitination
observed gene count: 3
expected gene count: 2.7232196091421
uncorrected p-value: 0.518986173742942
GO ID	term	observed gene count	expected gene count	uncorrected p-value
GO:0016567	protein ubiquitination	3	2.72322	0.518986
Cluster 101: nuclear-transcribed mRNA catabolic process
observed gene count: 1
expected gene count: 0.736005299768135
uncorrected p-value: 0.534542455095215
GO ID	term	observed gene count	expected gene count	uncorrected p-value
GO:0000956	nuclear-transcribed mRNA catabolic process	1	0.220802	0.204962
Cluster 102: syncytial blastoderm mitotic cell cycle
observed gene count: 2
expected gene count: 1.76641271944352
uncorrected p-value: 0.536121289514064
GO ID	term	observed gene count	expected gene count	uncorrected p-value
GO:0035186	syncytial blastoderm mitotic cell cycle	2	1.10401	0.303765
Cluster 103: molting cycle, chitin-based cuticle
observed gene count: 1
expected gene count: 0.956806889698576
uncorrected p-value: 0.630001911752713
GO ID	term	observed gene count	expected gene count	uncorrected p-value
GO:0007591	molting cycle, chitin-based cuticle	1	0.956807	0.630002
Cluster 104: visual perception
observed gene count: 1
expected gene count: 1.03040741967539
uncorrected p-value: 0.657257439934832
GO ID	term	observed gene count	expected gene count	uncorrected p-value
GO:0007601	visual perception	1	1.03041	0.657257
Cluster 105: autophagic cell death
observed gene count: 4
expected gene count: 5.37283868830739
uncorrected p-value: 0.794952897561722
GO ID	term	observed gene count	expected gene count	uncorrected p-value
GO:0048102	autophagic cell death	4	4.19523	0.612619
GO:0035071	salivary gland cell autophagic cell death	4	4.85763	0.725538
Cluster 106: endosome transport
observed gene count: 10
expected gene count: 13.1744948658496
uncorrected p-value: 0.856806885033465
GO ID	term	observed gene count	expected gene count	uncorrected p-value
GO:0006471	protein amino acid ADP-ribosylation	3	0.588804	0.0168167
GO:0016197	endosome transport	3	0.956807	0.0652327
GO:0007267	cell-cell signaling	2	0.515204	0.0887152
GO:0048488	synaptic vesicle endocytosis	3	2.20802	0.381524
GO:0006836	neurotransmitter transport	2	1.76641	0.536121
GO:0007269	neurotransmitter secretion	6	6.77125	0.679091
Cluster 107: chromatin assembly
observed gene count: 7
expected gene count: 10.0832726068235
uncorrected p-value: 0.885475333342654
GO ID	term	observed gene count	expected gene count	uncorrected p-value
GO:0031497	chromatin assembly	1	0.147201	0.141789
GO:0006334	nucleosome assembly	6	9.49447	0.92019
GO:0006333	chromatin assembly or disassembly	4	8.83206	0.97998
Cluster 108: transmembrane transport
observed gene count: 12
expected gene count: 21.8593574031136
uncorrected p-value: 0.993832355228069
GO ID	term	observed gene count	expected gene count	uncorrected p-value
GO:0006612	protein targeting to membrane	1	0.147201	0.141789
GO:0006614	SRP-dependent cotranslational protein targeting to membrane	2	0.809606	0.191736
GO:0055085	transmembrane transport	9	20.3873	0.998887
Cluster 109: ion transport
observed gene count: 4
expected gene count: 12.2912885061279
uncorrected p-value: 0.998677123511535
GO ID	term	observed gene count	expected gene count	uncorrected p-value
GO:0006814	sodium ion transport	3	3.82723	0.747053
GO:0006811	ion transport	1	3.53283	0.974664
Cluster 110: proteolysis
observed gene count: 7
expected gene count: 41.2162967870156
uncorrected p-value: 0.999999999998341
GO ID	term	observed gene count	expected gene count	uncorrected p-value
GO:0030163	protein catabolic process	1	1.54561	0.799422
GO:0006508	proteolysis	6	40.1859	1

## Sheet: Embryo10-12h
sample name: Embryo10-12h
number of associated genes in the sample: 1255
Cluster 1: regulation of RNA metabolic process
observed gene count: 87
expected gene count: 29.5147399801259
uncorrected p-value: 9.18557046602407e-21
GO ID	term	observed gene count	expected gene count	uncorrected p-value
GO:0006355	regulation of transcription, DNA-dependent	86	29.4316	2.85092e-20
GO:0051252	regulation of RNA metabolic process	1	0.0831401	0.0831401
Cluster 2: gliogenesis
observed gene count: 26
expected gene count: 5.8198078834051
uncorrected p-value: 1.9890136524688e-11
GO ID	term	observed gene count	expected gene count	uncorrected p-value
GO:0035151	regulation of tube size, open tracheal system	11	1.49652	2.31516e-08
GO:0019991	septate junction assembly	13	2.24478	5.65677e-08
GO:0010001	glial cell differentiation	6	0.914541	0.00010458
GO:0042063	gliogenesis	4	0.498841	0.00062218
GO:0021782	glial cell development	4	0.581981	0.00135604
GO:0045216	cell-cell junction organization	1	0.24942	0.229272
GO:0035152	regulation of tube architecture, open tracheal system	2	1.08082	0.295044
Cluster 3: lysosome organization
observed gene count: 24
expected gene count: 5.57038754554488
uncorrected p-value: 2.83994011104508e-10
GO ID	term	observed gene count	expected gene count	uncorrected p-value
GO:0006614	SRP-dependent cotranslational protein targeting to membrane	10	0.914541	1.5535e-10
GO:0006616	SRP-dependent cotranslational protein targeting to membrane, translocation	4	0.498841	0.00062218
GO:0010507	negative regulation of autophagy	4	0.581981	0.00135604
GO:0006613	cotranslational protein targeting to membrane	1	0.0831401	0.0831401
GO:0034620	cellular response to unfolded protein	1	0.0831401	0.0831401
GO:0030968	endoplasmic reticulum unfolded protein response	2	0.581981	0.109587
GO:0006612	protein targeting to membrane	1	0.16628	0.159373
GO:0034976	response to endoplasmic reticulum stress	1	0.16628	0.159373
GO:0007040	lysosome organization	2	0.914541	0.231177
GO:0010506	regulation of autophagy	2	1.82908	0.556504
Cluster 4: cell motion
observed gene count: 75
expected gene count: 36.3322292149718
uncorrected p-value: 1.00392613993133e-09
GO ID	term	observed gene count	expected gene count	uncorrected p-value
GO:0007409	axonogenesis	15	4.15701	8.00087e-06
GO:0007411	axon guidance	28	12.8867	7.15419e-05
GO:0000902	cell morphogenesis	12	3.90759	0.000348815
GO:0031175	neuron projection development	3	0.24942	0.000573429
GO:0048812	neuron projection morphogenesis	17	8.72971	0.00577816
GO:0048666	neuron development	8	3.40874	0.0180194
GO:0030182	neuron differentiation	3	0.748261	0.0329074
GO:0006928	cell motion	2	0.33256	0.0369987
GO:0048813	dendrite morphogenesis	17	10.9745	0.046517
GO:0016358	dendrite development	1	0.16628	0.159373
Cluster 5: cilium assembly
observed gene count: 18
expected gene count: 3.57502484266313
uncorrected p-value: 2.6030998973226e-09
GO ID	term	observed gene count	expected gene count	uncorrected p-value
GO:0042384	cilium assembly	12	2.32792	8.95493e-07
GO:0030031	cell projection assembly	6	1.16396	0.000546298
Cluster 6: cell cycle
observed gene count: 63
expected gene count: 30.1798608810865
uncorrected p-value: 1.44575730380509e-08
GO ID	term	observed gene count	expected gene count	uncorrected p-value
GO:0000022	mitotic spindle elongation	35	6.56807	8.87429e-18
GO:0007052	mitotic spindle organization	42	15.6303	2.33087e-09
GO:0007010	cytoskeleton organization	7	3.57502	0.0624108
GO:0000226	microtubule cytoskeleton organization	3	2.57734	0.482314
GO:0000278	mitotic cell cycle	3	2.66048	0.503899
GO:0007017	microtubule-based process	4	3.90759	0.556434
GO:0007049	cell cycle	3	3.07618	0.604156
GO:0007051	spindle organization	1	0.914541	0.615241
Cluster 7: negative regulation of gene expression
observed gene count: 47
expected gene count: 19.7873468035773
uncorrected p-value: 1.78808426773008e-08
GO ID	term	observed gene count	expected gene count	uncorrected p-value
GO:0000122	negative regulation of transcription from RNA polymerase II promoter	27	11.6396	2.93163e-05
GO:0010629	negative regulation of gene expression	13	4.82213	0.000780686
GO:0045892	negative regulation of transcription, DNA-dependent	16	6.81749	0.00103525
Cluster 8: protein transport
observed gene count: 44
expected gene count: 17.9582643259357
uncorrected p-value: 1.94064833360392e-08
GO ID	term	observed gene count	expected gene count	uncorrected p-value
GO:0006614	SRP-dependent cotranslational protein targeting to membrane	10	0.914541	1.5535e-10
GO:0006886	intracellular protein transport	15	6.23551	0.00112874
GO:0008104	protein localization	9	3.74131	0.0106158
GO:0046907	intracellular transport	4	1.16396	0.024208
GO:0006613	cotranslational protein targeting to membrane	1	0.0831401	0.0831401
GO:0006612	protein targeting to membrane	1	0.16628	0.159373
GO:0015031	protein transport	7	5.57039	0.321751
GO:0045184	establishment of protein localization	1	0.498841	0.406011
GO:0006605	protein targeting	1	0.498841	0.406011
Cluster 9: respiratory system development
observed gene count: 30
expected gene count: 10.3925140775091
uncorrected p-value: 8.27258405899202e-08
GO ID	term	observed gene count	expected gene count	uncorrected p-value
GO:0007424	open tracheal system development	24	8.81285	4.79909e-06
GO:0035147	branch fusion, open tracheal system	7	1.74594	0.00110807
GO:0001763	morphogenesis of a branching structure	3	0.581981	0.0155495
GO:0060446	branching involved in open tracheal system development	3	0.665121	0.0233589
GO:0060541	respiratory system development	1	0.0831401	0.0831401
GO:0048754	branching morphogenesis of a tube	1	0.16628	0.159373
Cluster 10: eye development
observed gene count: 45
expected gene count: 20.0367671414376
uncorrected p-value: 1.99483852080367e-07
GO ID	term	observed gene count	expected gene count	uncorrected p-value
GO:0001745	compound eye morphogenesis	23	6.90063	1.65796e-07
GO:0007423	sensory organ development	13	4.98841	0.00109416
GO:0048749	compound eye development	13	9.56111	0.158705
GO:0001654	eye development	2	0.997681	0.263106
GO:0048592	eye morphogenesis	1	0.665121	0.500712
Cluster 11: endocytosis
observed gene count: 55
expected gene count: 26.8542563762835
uncorrected p-value: 2.28705998831879e-07
GO ID	term	observed gene count	expected gene count	uncorrected p-value
GO:0016192	vesicle-mediated transport	20	7.15005	1.91599e-05
GO:0006911	phagocytosis, engulfment	31	14.8821	6.916e-05
GO:0006909	phagocytosis	4	1.49652	0.0568204
GO:0006897	endocytosis	4	3.49188	0.46633
GO:0016044	membrane organization	1	1.08082	0.676604
Cluster 12: myoblast fusion
observed gene count: 13
expected gene count: 2.49420337860219
uncorrected p-value: 2.66427760401685e-07
GO ID	term	observed gene count	expected gene count	uncorrected p-value
GO:0007520	myoblast fusion	13	2.4942	2.66428e-07
Cluster 13: rRNA processing
observed gene count: 18
expected gene count: 4.9052666445843
uncorrected p-value: 7.65998056813905e-07
GO ID	term	observed gene count	expected gene count	uncorrected p-value
GO:0042254	ribosome biogenesis	11	2.32792	7.15457e-06
GO:0006364	rRNA processing	6	2.4942	0.0343795
GO:0000154	rRNA modification	1	0.16628	0.159373
Cluster 14: antennal development
observed gene count: 17
expected gene count: 4.65584630672408
uncorrected p-value: 1.67354987884652e-06
GO ID	term	observed gene count	expected gene count	uncorrected p-value
GO:0048800	antennal morphogenesis	6	1.16396	0.000546298
GO:0007455	eye-antennal disc morphogenesis	6	2.0785	0.0146053
GO:0035214	eye-antennal disc development	4	1.16396	0.024208
GO:0007469	antennal development	3	0.748261	0.0329074
Cluster 15: positive regulation of gene expression
observed gene count: 38
expected gene count: 18.5402451142762
uncorrected p-value: 1.61615494891298e-05
GO ID	term	observed gene count	expected gene count	uncorrected p-value
GO:0045944	positive regulation of transcription from RNA polymerase II promoter	30	13.8013	3.97646e-05
GO:0010628	positive regulation of gene expression	5	1.41338	0.0104535
GO:0045893	positive regulation of transcription, DNA-dependent	12	6.31865	0.0223543
Cluster 16: RNA splicing
observed gene count: 41
expected gene count: 20.7850281550182
uncorrected p-value: 1.95704614066646e-05
GO ID	term	observed gene count	expected gene count	uncorrected p-value
GO:0000398	nuclear mRNA splicing, via spliceosome	33	17.7088	0.000362201
GO:0008380	RNA splicing	4	1.16396	0.024208
GO:0006396	RNA processing	5	1.82908	0.0314801
GO:0016071	mRNA metabolic process	1	0.0831401	0.0831401
GO:0006397	mRNA processing	3	1.6628	0.228796
Cluster 17: salivary gland development
observed gene count: 15
expected gene count: 5.23782709506459
uncorrected p-value: 0.000155299823246611
GO ID	term	observed gene count	expected gene count	uncorrected p-value
GO:0007435	salivary gland morphogenesis	12	4.15701	0.000642217
GO:0007431	salivary gland development	5	2.0785	0.0517296
Cluster 18: protein processing
observed gene count: 9
expected gene count: 2.16164292812189
uncorrected p-value: 0.000156734488427284
GO ID	term	observed gene count	expected gene count	uncorrected p-value
GO:0006465	signal peptide processing	6	0.498841	3.26661e-07
GO:0016485	protein processing	3	1.49652	0.184387
Cluster 19: tRNA processing
observed gene count: 8
expected gene count: 1.99536270288175
uncorrected p-value: 0.000489783404143236
GO ID	term	observed gene count	expected gene count	uncorrected p-value
GO:0006400	tRNA modification	3	0.581981	0.0155495
GO:0008033	tRNA processing	4	1.08082	0.0184832
GO:0009451	RNA modification	1	0.24942	0.229272
Cluster 20: leg disc pattern formation
observed gene count: 11
expected gene count: 3.57502484266313
uncorrected p-value: 0.000599754640153579
GO ID	term	observed gene count	expected gene count	uncorrected p-value
GO:0007479	leg disc proximal/distal pattern formation	5	1.33024	0.00791173
GO:0007432	salivary gland boundary specification	4	1.08082	0.0184832
GO:0007449	proximal/distal pattern formation, imaginal disc	2	0.24942	0.0195748
GO:0008052	sensory organ boundary specification	2	0.581981	0.109587
GO:0035223	leg disc pattern formation	1	0.16628	0.159373
GO:0007447	imaginal disc pattern formation	1	0.914541	0.615241
Cluster 21: regulation of neurogenesis
observed gene count: 10
expected gene count: 3.0761841669427
uncorrected p-value: 0.000660252214813264
GO ID	term	observed gene count	expected gene count	uncorrected p-value
GO:0051960	regulation of nervous system development	4	0.33256	4.75704e-05
GO:0048814	regulation of dendrite morphogenesis	5	1.41338	0.0104535
GO:0045664	regulation of neuron differentiation	1	0.33256	0.293363
GO:0050767	regulation of neurogenesis	1	0.665121	0.500712
Cluster 22: regulation of synaptogenesis
observed gene count: 19
expected gene count: 8.48029148724743
uncorrected p-value: 0.000669897081461497
GO ID	term	observed gene count	expected gene count	uncorrected p-value
GO:0016202	regulation of striated muscle tissue development	5	0.581981	7.17849e-05
GO:0008582	regulation of synaptic growth at neuromuscular junction	7	1.91222	0.00201617
GO:0050807	regulation of synapse organization	3	0.831401	0.0441652
GO:0007274	neuromuscular synaptic transmission	6	2.82676	0.0588489
GO:0051963	regulation of synaptogenesis	1	0.16628	0.159373
GO:0050803	regulation of synapse structure and activity	1	1.16396	0.703514
Cluster 23: neuron recognition
observed gene count: 8
expected gene count: 2.16164292812189
uncorrected p-value: 0.000895556309012587
GO ID	term	observed gene count	expected gene count	uncorrected p-value
GO:0007413	axonal fasciculation	6	1.33024	0.00126006
GO:0016198	axon choice point recognition	1	0.33256	0.293363
GO:0008038	neuron recognition	1	0.581981	0.455415
Cluster 24: cell motion
observed gene count: 8
expected gene count: 2.16164292812189
uncorrected p-value: 0.000895556309012587
GO ID	term	observed gene count	expected gene count	uncorrected p-value
GO:0016477	cell migration	7	1.91222	0.00201617
GO:0006928	cell motion	2	0.33256	0.0369987
Cluster 25: transcription initiation
observed gene count: 22
expected gene count: 10.9744948658496
uncorrected p-value: 0.00125758035033206
GO ID	term	observed gene count	expected gene count	uncorrected p-value
GO:0006351	transcription, DNA-dependent	10	3.74131	0.0032883
GO:0006366	transcription from RNA polymerase II promoter	9	3.99073	0.016072
GO:0006352	transcription initiation	1	0.748261	0.542245
GO:0006367	transcription initiation from RNA polymerase II promoter	5	5.32097	0.623764
Cluster 26: hemocyte migration
observed gene count: 24
expected gene count: 12.7204372308712
uncorrected p-value: 0.00183145497147342
GO ID	term	observed gene count	expected gene count	uncorrected p-value
GO:0007163	establishment or maintenance of cell polarity	11	2.66048	3.14977e-05
GO:0042067	establishment of ommatidial polarity	8	2.41106	0.00196634
GO:0001736	establishment of planar polarity	6	2.4942	0.0343795
GO:0001737	establishment of imaginal disc-derived wing hair orientation	5	2.0785	0.0517296
GO:0008544	epidermis development	3	1.16396	0.104694
GO:0035099	hemocyte migration	3	1.49652	0.184387
GO:0035316	non-sensory hair organization	1	0.33256	0.293363
GO:0007398	ectoderm development	3	1.91222	0.298314
GO:0001738	morphogenesis of a polarized epithelium	2	1.33024	0.388871
GO:0009913	epidermal cell differentiation	1	0.498841	0.406011
GO:0035317	imaginal disc-derived wing hair organization	2	1.49652	0.448293
GO:0007164	establishment of tissue polarity	1	0.581981	0.455415
Cluster 27: gastrulation
observed gene count: 17
expected gene count: 7.89831069890692
uncorrected p-value: 0.00198244380182255
GO ID	term	observed gene count	expected gene count	uncorrected p-value
GO:0007501	mesodermal cell fate specification	4	0.914541	0.00975381
GO:0001710	mesodermal cell fate commitment	2	0.498841	0.0827189
GO:0007498	mesoderm development	9	5.57039	0.101913
GO:0001707	mesoderm formation	1	0.16628	0.159373
GO:0007369	gastrulation	3	2.0785	0.345338
Cluster 28: leg disc development
observed gene count: 14
expected gene count: 6.40178867174561
uncorrected p-value: 0.004111791660986
GO ID	term	observed gene count	expected gene count	uncorrected p-value
GO:0016348	imaginal disc-derived leg joint morphogenesis	4	0.914541	0.00975381
GO:0035218	leg disc development	3	0.665121	0.0233589
GO:0007480	imaginal disc-derived leg morphogenesis	9	4.57271	0.0363258
GO:0007478	leg disc morphogenesis	1	0.16628	0.159373
Cluster 29: morphogenesis of embryonic epithelium
observed gene count: 12
expected gene count: 5.23782709506459
uncorrected p-value: 0.00518183274096932
GO ID	term	observed gene count	expected gene count	uncorrected p-value
GO:0007163	establishment or maintenance of cell polarity	11	2.66048	3.14977e-05
GO:0016331	morphogenesis of embryonic epithelium	1	0.665121	0.500712
Cluster 30: regulation of cell shape
observed gene count: 25
expected gene count: 14.6326598211328
uncorrected p-value: 0.00573798736305823
GO ID	term	observed gene count	expected gene count	uncorrected p-value
GO:0030866	cortical actin cytoskeleton organization	8	1.74594	0.000169797
GO:0008360	regulation of cell shape	16	7.39947	0.00252662
GO:0030036	actin cytoskeleton organization	9	4.15701	0.0207008
GO:0007015	actin filament organization	7	5.73667	0.349381
GO:0030029	actin filament-based process	1	0.498841	0.406011
Cluster 31: synapse organization
observed gene count: 20
expected gene count: 10.8913547532295
uncorrected p-value: 0.00574691431952937
GO ID	term	observed gene count	expected gene count	uncorrected p-value
GO:0048747	muscle fiber development	4	0.665121	0.00253381
GO:0007517	muscle organ development	10	5.23783	0.0340849
GO:0007519	skeletal muscle tissue development	3	1.16396	0.104694
GO:0050808	synapse organization	2	0.997681	0.263106
GO:0007528	neuromuscular junction development	4	3.24246	0.409224
Cluster 32: metamorphosis
observed gene count: 44
expected gene count: 30.1798608810865
uncorrected p-value: 0.00723840608090415
GO ID	term	observed gene count	expected gene count	uncorrected p-value
GO:0007389	pattern specification process	6	1.74594	0.00595504
GO:0007472	wing disc morphogenesis	4	1.41338	0.0471941
GO:0035220	wing disc development	10	5.90295	0.0681726
GO:0007476	imaginal disc-derived wing morphogenesis	21	16.3786	0.142805
GO:0009791	post-embryonic development	1	0.16628	0.159373
GO:0007560	imaginal disc morphogenesis	1	0.498841	0.406011
GO:0007444	imaginal disc development	3	2.74362	0.52501
GO:0007552	metamorphosis	3	2.99304	0.585207
Cluster 33: oligosaccharide metabolic process
observed gene count: 6
expected gene count: 1.8290824776416
uncorrected p-value: 0.00762204902201391
GO ID	term	observed gene count	expected gene count	uncorrected p-value
GO:0009312	oligosaccharide biosynthetic process	4	1.08082	0.0184832
GO:0009311	oligosaccharide metabolic process	1	0.33256	0.293363
GO:0016051	carbohydrate biosynthetic process	1	0.415701	0.352129
Cluster 34: wing disc pattern formation
observed gene count: 7
expected gene count: 2.41106326598211
uncorrected p-value: 0.00827355510647037
GO ID	term	observed gene count	expected gene count	uncorrected p-value
GO:0048100	wing disc anterior/posterior pattern formation	4	0.997681	0.0136811
GO:0035222	wing disc pattern formation	3	1.16396	0.104694
GO:0007448	anterior/posterior pattern formation, imaginal disc	1	0.665121	0.500712
Cluster 35: protein retention in ER lumen
observed gene count: 4
expected gene count: 0.997681351440874
uncorrected p-value: 0.0136810990283118
GO ID	term	observed gene count	expected gene count	uncorrected p-value
GO:0006621	protein retention in ER lumen	3	0.24942	0.000573429
GO:0045185	maintenance of protein location	1	0.33256	0.293363
Cluster 36: cell proliferation
observed gene count: 19
expected gene count: 11.2239152037098
uncorrected p-value: 0.0161392027084981
GO ID	term	observed gene count	expected gene count	uncorrected p-value
GO:0055059	asymmetric neuroblast division	7	2.4942	0.0100341
GO:0045176	apical protein localization	3	0.748261	0.0329074
GO:0008283	cell proliferation	10	6.06923	0.0792101
GO:0008105	asymmetric protein localization	3	1.33024	0.142667
GO:0007405	neuroblast proliferation	2	1.6628	0.504313
GO:0048103	somatic stem cell division	1	0.748261	0.542245
Cluster 37: photoreceptor cell development
observed gene count: 12
expected gene count: 6.15236833388539
uncorrected p-value: 0.018403840707634
GO ID	term	observed gene count	expected gene count	uncorrected p-value
GO:0046552	photoreceptor cell fate commitment	2	0.16628	0.00690723
GO:0046530	photoreceptor cell differentiation	2	0.33256	0.0369987
GO:0001751	compound eye photoreceptor cell differentiation	5	2.0785	0.0517296
GO:0042461	photoreceptor cell development	1	0.24942	0.229272
GO:0042051	compound eye photoreceptor development	3	1.91222	0.298314
Cluster 38: RNA localization
observed gene count: 30
expected gene count: 20.2861874792978
uncorrected p-value: 0.0196976800159369
GO ID	term	observed gene count	expected gene count	uncorrected p-value
GO:0009953	dorsal/ventral pattern formation	7	2.24478	0.0054469
GO:0009950	dorsal/ventral axis specification	5	2.4942	0.0989598
GO:0048599	oocyte development	2	0.581981	0.109587
GO:0045451	pole plasm oskar mRNA localization	5	2.57734	0.110349
GO:0009952	anterior/posterior pattern formation	3	1.49652	0.184387
GO:0006403	RNA localization	1	0.24942	0.229272
GO:0009880	embryonic pattern specification	3	1.82908	0.274905
GO:0007350	blastoderm segmentation	3	1.82908	0.274905
GO:0009798	axis specification	1	0.665121	0.500712
GO:0007354	zygotic determination of anterior/posterior axis, embryo	1	0.665121	0.500712
GO:0007310	oocyte dorsal/ventral axis specification	2	1.74594	0.530904
GO:0008298	intracellular mRNA localization	2	1.91222	0.581093
GO:0008595	determination of anterior/posterior axis, embryo	3	3.07618	0.604156
GO:0007281	germ cell development	2	2.4942	0.72508
GO:0007309	oocyte axis specification	1	1.2471	0.728187
GO:0007315	pole plasm assembly	1	1.33024	0.750808
GO:0007314	oocyte anterior/posterior axis specification	1	1.99536	0.875677
Cluster 39: gonad development
observed gene count: 14
expected gene count: 7.73203047366678
uncorrected p-value: 0.0211298213656076
GO ID	term	observed gene count	expected gene count	uncorrected p-value
GO:0008406	gonad development	6	2.74362	0.0519656
GO:0008585	female gonad development	3	0.914541	0.0570694
GO:0007280	pole cell migration	4	1.91222	0.118845
GO:0008354	germ cell migration	4	2.82676	0.312093
GO:0007548	sex differentiation	2	1.33024	0.388871
Cluster 40: regulation of phosphorylation
observed gene count: 7
expected gene count: 2.90990394170255
uncorrected p-value: 0.0230783658324038
GO ID	term	observed gene count	expected gene count	uncorrected p-value
GO:0000079	regulation of cyclin-dependent protein kinase activity	5	1.2471	0.00583308
GO:0042325	regulation of phosphorylation	2	0.665121	0.138329
GO:0045859	regulation of protein kinase activity	1	1.08082	0.676604
Cluster 41: hemopoiesis
observed gene count: 9
expected gene count: 4.24014574362372
uncorrected p-value: 0.0233437445191401
GO ID	term	observed gene count	expected gene count	uncorrected p-value
GO:0042688	crystal cell differentiation	3	0.581981	0.0155495
GO:0042689	regulation of crystal cell differentiation	1	0.16628	0.159373
GO:0048542	lymph gland development	3	1.49652	0.184387
GO:0045610	regulation of hemocyte differentiation	2	1.08082	0.295044
GO:0042386	hemocyte differentiation	1	0.581981	0.455415
GO:0030097	hemopoiesis	2	1.74594	0.530904
Cluster 42: cell redox homeostasis
observed gene count: 9
expected gene count: 4.32328585624379
uncorrected p-value: 0.0262187831388922
GO ID	term	observed gene count	expected gene count	uncorrected p-value
GO:0045454	cell redox homeostasis	9	4.15701	0.0207008
Cluster 43: glycerol ether metabolic process
observed gene count: 4
expected gene count: 1.24710168930109
uncorrected p-value: 0.030889855731524
GO ID	term	observed gene count	expected gene count	uncorrected p-value
GO:0006662	glycerol ether metabolic process	4	1.2471	0.0308899
Cluster 44: eye pigment granule organization
observed gene count: 3
expected gene count: 0.831401126200729
uncorrected p-value: 0.0441651846630427
GO ID	term	observed gene count	expected gene count	uncorrected p-value
GO:0008057	eye pigment granule organization	3	0.831401	0.0441652
Cluster 45: vesicle coating
observed gene count: 21
expected gene count: 14.3832394832726
uncorrected p-value: 0.0507887400545981
GO ID	term	observed gene count	expected gene count	uncorrected p-value
GO:0016183	synaptic vesicle coating	5	0.997681	0.00189924
GO:0006901	vesicle coating	4	0.748261	0.00426199
GO:0007269	neurotransmitter secretion	15	7.64889	0.00861556
GO:0007267	cell-cell signaling	3	0.581981	0.0155495
GO:0048488	synaptic vesicle endocytosis	6	2.4942	0.0343795
GO:0006900	membrane budding	1	0.0831401	0.0831401
GO:0032940	secretion by cell	1	0.0831401	0.0831401
GO:0048489	synaptic vesicle transport	1	0.914541	0.615241
GO:0006836	neurotransmitter transport	1	1.99536	0.875677
GO:0007268	synaptic transmission	1	3.90759	0.983196
Cluster 46: methylation
observed gene count: 6
expected gene count: 2.7436237164624
uncorrected p-value: 0.0519656341393366
GO ID	term	observed gene count	expected gene count	uncorrected p-value
GO:0001510	RNA methylation	3	0.665121	0.0233589
GO:0032259	methylation	3	0.748261	0.0329074
Cluster 47: nuclear migration
observed gene count: 3
expected gene count: 0.914541238820802
uncorrected p-value: 0.0570694488645662
GO ID	term	observed gene count	expected gene count	uncorrected p-value
GO:0007097	nuclear migration	2	0.498841	0.0827189
GO:0051647	nucleus localization	1	0.24942	0.229272
Cluster 48: regulation of apoptosis
observed gene count: 14
expected gene count: 9.06227227558794
uncorrected p-value: 0.0675445776038045
GO ID	term	observed gene count	expected gene count	uncorrected p-value
GO:0043524	negative regulation of neuron apoptosis	4	1.08082	0.0184832
GO:0042981	regulation of apoptosis	4	1.6628	0.0789491
GO:0060548	negative regulation of cell death	2	0.914541	0.231177
GO:0043069	negative regulation of programmed cell death	1	0.581981	0.455415
GO:0043066	negative regulation of apoptosis	4	4.32329	0.6377
Cluster 49: cuticle development
observed gene count: 15
expected gene count: 10.0599536270288
uncorrected p-value: 0.0767214107812071
GO ID	term	observed gene count	expected gene count	uncorrected p-value
GO:0035293	chitin-based larval cuticle pattern formation	5	0.914541	0.00118891
GO:0008363	larval chitin-based cuticle development	4	1.08082	0.0184832
GO:0035017	cuticle pattern formation	3	1.2471	0.123145
GO:0042335	cuticle development	2	0.748261	0.16845
GO:0002168	instar larval development	4	2.24478	0.182533
GO:0040003	chitin-based cuticle development	4	3.90759	0.556434
GO:0007591	molting cycle, chitin-based cuticle	1	1.08082	0.676604
Cluster 50: neuroblast fate commitment
observed gene count: 5
expected gene count: 2.32792315336204
uncorrected p-value: 0.0780781158821479
GO ID	term	observed gene count	expected gene count	uncorrected p-value
GO:0007400	neuroblast fate determination	5	2.24478	0.0686207
GO:0014017	neuroblast fate commitment	1	0.0831401	0.0831401
Cluster 51: regulation of organ growth
observed gene count: 5
expected gene count: 2.32792315336204
uncorrected p-value: 0.0780781158821479
GO ID	term	observed gene count	expected gene count	uncorrected p-value
GO:0045570	regulation of imaginal disc growth	4	0.914541	0.00975381
GO:0046620	regulation of organ growth	1	1.33024	0.750808
Cluster 52: ommochrome biosynthetic process
observed gene count: 6
expected gene count: 3.0761841669427
uncorrected p-value: 0.0826005475854974
GO ID	term	observed gene count	expected gene count	uncorrected p-value
GO:0006727	ommochrome biosynthetic process	4	1.41338	0.0471941
GO:0006726	eye pigment biosynthetic process	2	1.08082	0.295044
GO:0048066	pigmentation during development	2	1.08082	0.295044
Cluster 53: gut development
observed gene count: 6
expected gene count: 3.0761841669427
uncorrected p-value: 0.0826005475854974
GO ID	term	observed gene count	expected gene count	uncorrected p-value
GO:0007440	foregut morphogenesis	3	0.914541	0.0570694
GO:0048619	embryonic hindgut morphogenesis	2	0.415701	0.0583015
GO:0007442	hindgut morphogenesis	4	1.57966	0.0674136
GO:0048546	digestive tract morphogenesis	1	0.16628	0.159373
GO:0048565	gut development	1	0.24942	0.229272
Cluster 54: peptidyl-proline modification
observed gene count: 4
expected gene count: 1.74594236502153
uncorrected p-value: 0.0913940853507446
GO ID	term	observed gene count	expected gene count	uncorrected p-value
GO:0018401	peptidyl-proline hydroxylation to 4-hydroxy-L-proline	3	1.16396	0.104694
GO:0018208	peptidyl-proline modification	1	0.581981	0.455415
Cluster 55: growth
observed gene count: 9
expected gene count: 5.48724743292481
uncorrected p-value: 0.0948282530025614
GO ID	term	observed gene count	expected gene count	uncorrected p-value
GO:0048675	axon extension	4	1.6628	0.0789491
GO:0040007	growth	3	1.74594	0.251696
GO:0016049	cell growth	2	1.16396	0.326769
GO:0008361	regulation of cell size	1	1.2471	0.728187
Cluster 56: dsRNA transport
observed gene count: 5
expected gene count: 2.49420337860219
uncorrected p-value: 0.0989597629308473
GO ID	term	observed gene count	expected gene count	uncorrected p-value
GO:0033227	dsRNA transport	4	1.99536	0.133753
GO:0006403	RNA localization	1	0.24942	0.229272
Cluster 57: exocytosis
observed gene count: 4
expected gene count: 1.8290824776416
uncorrected p-value: 0.104708296242732
GO ID	term	observed gene count	expected gene count	uncorrected p-value
GO:0006904	vesicle docking during exocytosis	2	0.581981	0.109587
GO:0006887	exocytosis	3	1.33024	0.142667
Cluster 58: negative regulation of signal transduction
observed gene count: 5
expected gene count: 2.57734349122226
uncorrected p-value: 0.110348570200766
GO ID	term	observed gene count	expected gene count	uncorrected p-value
GO:0045746	negative regulation of Notch signaling pathway	4	2.24478	0.182533
GO:0009968	negative regulation of signal transduction	1	0.33256	0.293363
Cluster 59: regulation of mitotic cell cycle
observed gene count: 8
expected gene count: 5.07154686982445
uncorrected p-value: 0.131362113041371
GO ID	term	observed gene count	expected gene count	uncorrected p-value
GO:0007427	epithelial cell migration, open tracheal system	7	2.57734	0.0120525
GO:0007346	regulation of mitotic cell cycle	2	2.57734	0.741823
Cluster 60: dorsal closure
observed gene count: 19
expected gene count: 14.4663795958927
uncorrected p-value: 0.133907785719675
GO ID	term	observed gene count	expected gene count	uncorrected p-value
GO:0007391	dorsal closure	11	7.39947	0.119166
GO:0008258	head involution	6	3.40874	0.121326
GO:0048598	embryonic morphogenesis	2	0.831401	0.199521
GO:0009792	embryonic development ending in birth or egg hatching	2	0.831401	0.199521
GO:0016331	morphogenesis of embryonic epithelium	1	0.665121	0.500712
GO:0001700	embryonic development via the syncytial blastoderm	4	4.15701	0.606382
Cluster 61: JNK cascade
observed gene count: 16
expected gene count: 12.0553163299106
uncorrected p-value: 0.14903837771296
GO ID	term	observed gene count	expected gene count	uncorrected p-value
GO:0030707	ovarian follicle cell development	13	4.48957	0.000374413
GO:0046843	dorsal appendage formation	6	2.82676	0.0588489
GO:0000165	MAPKKK cascade	2	0.831401	0.199521
GO:0007254	JNK cascade	3	2.0785	0.345338
GO:0007304	chorion-containing eggshell formation	1	2.66048	0.937999
Cluster 62: regulation of pole plasm oskar mRNA localization
observed gene count: 4
expected gene count: 2.32792315336204
uncorrected p-value: 0.199942195115698
GO ID	term	observed gene count	expected gene count	uncorrected p-value
GO:0007317	regulation of pole plasm oskar mRNA localization	4	2.0785	0.149377
Cluster 63: protein amino acid glycosylation
observed gene count: 5
expected gene count: 3.15932427956277
uncorrected p-value: 0.205278902853964
GO ID	term	observed gene count	expected gene count	uncorrected p-value
GO:0006486	protein amino acid glycosylation	4	2.66048	0.273653
GO:0030166	proteoglycan biosynthetic process	1	0.33256	0.293363
Cluster 64: startle response
observed gene count: 3
expected gene count: 1.57966213978138
uncorrected p-value: 0.206318973704765
GO ID	term	observed gene count	expected gene count	uncorrected p-value
GO:0001964	startle response	3	1.16396	0.104694
GO:0031987	locomotion involved in locomotory behavior	3	1.33024	0.142667
GO:0048854	brain morphogenesis	3	1.33024	0.142667
Cluster 65: regulation of ARF GTPase activity
observed gene count: 4
expected gene count: 2.41106326598211
uncorrected p-value: 0.217821524709546
GO ID	term	observed gene count	expected gene count	uncorrected p-value
GO:0032312	regulation of ARF GTPase activity	3	0.665121	0.0233589
GO:0046578	regulation of Ras protein signal transduction	1	0.498841	0.406011
Cluster 66: cell division
observed gene count: 4
expected gene count: 2.66048360384233
uncorrected p-value: 0.273653168899661
GO ID	term	observed gene count	expected gene count	uncorrected p-value
GO:0051301	cell division	1	0.24942	0.229272
GO:0008356	asymmetric cell division	3	1.99536	0.321823
Cluster 67: response to light stimulus
observed gene count: 3
expected gene count: 1.8290824776416
uncorrected p-value: 0.274904971241847
GO ID	term	observed gene count	expected gene count	uncorrected p-value
GO:0009416	response to light stimulus	3	1.41338	0.163126
Cluster 68: epithelial structure maintenance
observed gene count: 1
expected gene count: 0.332560450480291
uncorrected p-value: 0.293363225492179
GO ID	term	observed gene count	expected gene count	uncorrected p-value
GO:0010669	epithelial structure maintenance	1	0.16628	0.159373
Cluster 69: spermatogenesis
observed gene count: 13
expected gene count: 10.8913547532295
uncorrected p-value: 0.293500998673573
GO ID	term	observed gene count	expected gene count	uncorrected p-value
GO:0007286	spermatid development	6	3.40874	0.121326
GO:0007283	spermatogenesis	8	7.89831	0.538671
Cluster 70: cell adhesion
observed gene count: 13
expected gene count: 11.0576349784697
uncorrected p-value: 0.312440465829746
GO ID	term	observed gene count	expected gene count	uncorrected p-value
GO:0007155	cell adhesion	12	9.89367	0.285062
GO:0016337	cell-cell adhesion	2	1.74594	0.530904
Cluster 71: nuclear export
observed gene count: 2
expected gene count: 1.16396157668102
uncorrected p-value: 0.326768775966708
GO ID	term	observed gene count	expected gene count	uncorrected p-value
GO:0051168	nuclear export	2	0.498841	0.0827189
Cluster 72: stem cell maintenance
observed gene count: 6
expected gene count: 4.73898641934415
uncorrected p-value: 0.336095164679953
GO ID	term	observed gene count	expected gene count	uncorrected p-value
GO:0030718	germ-line stem cell maintenance	4	3.07618	0.370448
GO:0019827	stem cell maintenance	1	0.581981	0.455415
GO:0042078	germ-line stem cell division	2	1.74594	0.530904
Cluster 73: response to heat
observed gene count: 7
expected gene count: 5.73666777078503
uncorrected p-value: 0.349380567302972
GO ID	term	observed gene count	expected gene count	uncorrected p-value
GO:0009408	response to heat	7	5.57039	0.321751
Cluster 74: carbohydrate biosynthetic process
observed gene count: 1
expected gene count: 0.415700563100364
uncorrected p-value: 0.352128658664753
GO ID	term	observed gene count	expected gene count	uncorrected p-value
GO:0016051	carbohydrate biosynthetic process	1	0.415701	0.352129
Cluster 75: locomotory behavior
observed gene count: 2
expected gene count: 1.41338191454124
uncorrected p-value: 0.418970418242302
GO ID	term	observed gene count	expected gene count	uncorrected p-value
GO:0007626	locomotory behavior	2	1.08082	0.295044
Cluster 76: regulation of cell cycle
observed gene count: 10
expected gene count: 9.22855250082809
uncorrected p-value: 0.444000522581846
GO ID	term	observed gene count	expected gene count	uncorrected p-value
GO:0051726	regulation of cell cycle	8	6.73435	0.359782
GO:0007346	regulation of mitotic cell cycle	2	2.57734	0.741823
Cluster 77: exocytosis
observed gene count: 4
expected gene count: 3.57502484266313
uncorrected p-value: 0.484935552572219
GO ID	term	observed gene count	expected gene count	uncorrected p-value
GO:0006887	exocytosis	3	1.33024	0.142667
GO:0016082	synaptic vesicle priming	2	1.08082	0.295044
Cluster 78: apoptosis
observed gene count: 5
expected gene count: 4.73898641934415
uncorrected p-value: 0.518724822161201
GO ID	term	observed gene count	expected gene count	uncorrected p-value
GO:0008219	cell death	2	0.914541	0.231177
GO:0012501	programmed cell death	2	1.2471	0.358096
GO:0006915	apoptosis	3	3.65816	0.720205
Cluster 79: regulation of alternative nuclear mRNA splicing, via spliceosome
observed gene count: 5
expected gene count: 4.9052666445843
uncorrected p-value: 0.550078665910738
GO ID	term	observed gene count	expected gene count	uncorrected p-value
GO:0000381	regulation of alternative nuclear mRNA splicing, via spliceosome	5	4.24015	0.419975
Cluster 80: immune response
observed gene count: 11
expected gene count: 11.1407750910898
uncorrected p-value: 0.563258049220926
GO ID	term	observed gene count	expected gene count	uncorrected p-value
GO:0006955	immune response	5	4.15701	0.403069
GO:0045087	innate immune response	4	3.24246	0.409224
GO:0006952	defense response	6	8.39715	0.854777
Cluster 81: oocyte fate determination
observed gene count: 4
expected gene count: 3.9907254057635
uncorrected p-value: 0.573462765932611
GO ID	term	observed gene count	expected gene count	uncorrected p-value
GO:0030706	germarium-derived oocyte differentiation	1	0.24942	0.229272
GO:0030716	oocyte fate determination	1	0.24942	0.229272
GO:0007293	germarium-derived egg chamber formation	2	1.6628	0.504313
GO:0007294	germarium-derived oocyte fate determination	2	2.32792	0.688838
Cluster 82: olfactory behavior
observed gene count: 9
expected gene count: 9.22855250082809
uncorrected p-value: 0.581502011976679
GO ID	term	observed gene count	expected gene count	uncorrected p-value
GO:0042048	olfactory behavior	5	3.57502	0.284921
GO:0007611	learning or memory	4	3.24246	0.409224
GO:0008355	olfactory learning	4	4.48957	0.66735
Cluster 83: protein ubiquitination
observed gene count: 3
expected gene count: 3.0761841669427
uncorrected p-value: 0.604156346375007
GO ID	term	observed gene count	expected gene count	uncorrected p-value
GO:0016567	protein ubiquitination	3	3.07618	0.604156
Cluster 84: oogenesis
observed gene count: 36
expected gene count: 37.5793309042729
uncorrected p-value: 0.632962753333812
GO ID	term	observed gene count	expected gene count	uncorrected p-value
GO:0030707	ovarian follicle cell development	13	4.48957	0.000374413
GO:0048477	oogenesis	22	16.5449	0.103304
GO:0032504	multicellular organism reproduction	4	18.1245	0.999992
Cluster 85: wing disc pattern formation
observed gene count: 5
expected gene count: 5.40410732030474
uncorrected p-value: 0.637602594149677
GO ID	term	observed gene count	expected gene count	uncorrected p-value
GO:0035222	wing disc pattern formation	3	1.16396	0.104694
GO:0007450	dorsal/ventral pattern formation, imaginal disc	1	0.831401	0.580326
GO:0048190	wing disc dorsal/ventral pattern formation	2	3.90759	0.91134
Cluster 86: lipid biosynthetic process
observed gene count: 2
expected gene count: 2.32792315336204
uncorrected p-value: 0.68883759734364
GO ID	term	observed gene count	expected gene count	uncorrected p-value
GO:0008610	lipid biosynthetic process	1	0.16628	0.159373
GO:0008654	phospholipid biosynthetic process	1	1.16396	0.703514
Cluster 87: autophagic cell death
observed gene count: 5
expected gene count: 6.06922822126532
uncorrected p-value: 0.73648212907094
GO ID	term	observed gene count	expected gene count	uncorrected p-value
GO:0035071	salivary gland cell autophagic cell death	5	5.48725	0.651123
GO:0048102	autophagic cell death	4	4.73899	0.708618
Cluster 88: courtship behavior
observed gene count: 4
expected gene count: 5.15468698244452
uncorrected p-value: 0.768853312063502
GO ID	term	observed gene count	expected gene count	uncorrected p-value
GO:0008049	male courtship behavior	4	2.9099	0.331506
GO:0007619	courtship behavior	2	2.16164	0.64875
Cluster 89: gene silencing
observed gene count: 3
expected gene count: 3.9907254057635
uncorrected p-value: 0.773615128894083
GO ID	term	observed gene count	expected gene count	uncorrected p-value
GO:0006342	chromatin silencing	3	3.07618	0.604156
GO:0016458	gene silencing	1	1.33024	0.750808
Cluster 90: purine nucleotide metabolic process
observed gene count: 1
expected gene count: 1.49652202716131
uncorrected p-value: 0.790562703142455
GO ID	term	observed gene count	expected gene count	uncorrected p-value
GO:0006163	purine nucleotide metabolic process	1	0.16628	0.159373
Cluster 91: negative regulation of translation
observed gene count: 1
expected gene count: 1.8290824776416
uncorrected p-value: 0.852067994815143
GO ID	term	observed gene count	expected gene count	uncorrected p-value
GO:0017148	negative regulation of translation	1	1.82908	0.852068
Cluster 92: transmembrane transport
observed gene count: 19
expected gene count: 23.5286518714806
uncorrected p-value: 0.864471272389835
GO ID	term	observed gene count	expected gene count	uncorrected p-value
GO:0006616	SRP-dependent cotranslational protein targeting to membrane, translocation	4	0.498841	0.00062218
GO:0055085	transmembrane transport	15	23.0298	0.975308
Cluster 93: phosphorylation
observed gene count: 17
expected gene count: 21.5332891685989
uncorrected p-value: 0.875882462971923
GO ID	term	observed gene count	expected gene count	uncorrected p-value
GO:0006468	protein amino acid phosphorylation	16	19.3716	0.821784
GO:0016310	phosphorylation	1	2.16164	0.895521
Cluster 94: cation transport
observed gene count: 5
expected gene count: 7.48261013580656
uncorrected p-value: 0.878298946852292
GO ID	term	observed gene count	expected gene count	uncorrected p-value
GO:0030001	metal ion transport	2	0.831401	0.199521
GO:0006812	cation transport	2	2.32792	0.688838
GO:0006814	sodium ion transport	2	4.32329	0.937677
Cluster 95: chromatin remodeling
observed gene count: 5
expected gene count: 7.981450811527
uncorrected p-value: 0.909715074556995
GO ID	term	observed gene count	expected gene count	uncorrected p-value
GO:0048096	chromatin-mediated maintenance of transcription	2	0.665121	0.138329
GO:0006325	chromatin organization	2	2.41106	0.707428
GO:0006338	chromatin remodeling	1	2.66048	0.937999
Cluster 96: transmembrane transport
observed gene count: 21
expected gene count: 27.6856575024843
uncorrected p-value: 0.930091360158465
GO ID	term	observed gene count	expected gene count	uncorrected p-value
GO:0006626	protein targeting to mitochondrion	5	2.16164	0.0598356
GO:0007005	mitochondrion organization	1	2.16164	0.895521
GO:0055085	transmembrane transport	15	23.0298	0.975308
Cluster 97: DNA repair
observed gene count: 8
expected gene count: 12.3878767803909
uncorrected p-value: 0.935416700903321
GO ID	term	observed gene count	expected gene count	uncorrected p-value
GO:0006281	DNA repair	5	4.73899	0.518725
GO:0006974	response to DNA damage stimulus	5	7.89831	0.90503
Cluster 98: mitosis
observed gene count: 5
expected gene count: 8.64657171248758
uncorrected p-value: 0.940432618943623
GO ID	term	observed gene count	expected gene count	uncorrected p-value
GO:0000280	nuclear division	1	0.581981	0.455415
GO:0007067	mitosis	4	7.98145	0.96345
Cluster 99: female meiosis
observed gene count: 3
expected gene count: 6.31864855912554
uncorrected p-value: 0.957611984814716
GO ID	term	observed gene count	expected gene count	uncorrected p-value
GO:0007143	female meiosis	2	2.0785	0.627213
GO:0007059	chromosome segregation	1	2.74362	0.943165
Cluster 100: determination of adult life span
observed gene count: 7
expected gene count: 12.0553163299106
uncorrected p-value: 0.962425647056068
GO ID	term	observed gene count	expected gene count	uncorrected p-value
GO:0008340	determination of adult life span	7	11.9722	0.96052
Cluster 101: chromatin assembly
observed gene count: 4
expected gene count: 10.0599536270288
uncorrected p-value: 0.992310787263729
GO ID	term	observed gene count	expected gene count	uncorrected p-value
GO:0031497	chromatin assembly	1	0.16628	0.159373
GO:0006333	chromatin assembly or disassembly	3	9.97681	0.997945
Cluster 102: proteolysis
observed gene count: 15
expected gene count: 51.6300099370653
uncorrected p-value: 0.999999999912893
GO ID	term	observed gene count	expected gene count	uncorrected p-value
GO:0030163	protein catabolic process	1	1.74594	0.838633
GO:0006508	proteolysis	14	45.3945	1

## Sheet: Embryo12-14h
sample name: Embryo12-14h
number of associated genes in the sample: 1116
Cluster 1: regulation of RNA metabolic process
observed gene count: 83
expected gene count: 26.2457767472673
uncorrected p-value: 1.03667153676379e-21
GO ID	term	observed gene count	expected gene count	uncorrected p-value
GO:0006355	regulation of transcription, DNA-dependent	82	26.1718	3.46973e-21
GO:0051252	regulation of RNA metabolic process	1	0.0739318	0.0739318
Cluster 2: axonogenesis
observed gene count: 55
expected gene count: 14.786353097052
uncorrected p-value: 3.92658126282769e-18
GO ID	term	observed gene count	expected gene count	uncorrected p-value
GO:0007411	axon guidance	44	11.4594	2.55774e-15
GO:0007409	axonogenesis	16	3.69659	3.18945e-07
GO:0016199	axon midline choice point recognition	10	1.84829	5.48159e-06
GO:0008038	neuron recognition	3	0.517522	0.0112519
GO:0016198	axon choice point recognition	1	0.295727	0.264542
Cluster 3: cell motion
observed gene count: 75
expected gene count: 26.9111626366346
uncorrected p-value: 2.0114421607301e-16
GO ID	term	observed gene count	expected gene count	uncorrected p-value
GO:0007411	axon guidance	44	11.4594	2.55774e-15
GO:0007409	axonogenesis	16	3.69659	3.18945e-07
GO:0031175	neuron projection development	2	0.221795	0.0155779
GO:0006928	cell motion	2	0.295727	0.0296326
GO:0000902	cell morphogenesis	7	3.47479	0.0557618
GO:0048667	cell morphogenesis involved in neuron differentiation	1	0.0739318	0.0739318
GO:0048666	neuron development	6	3.0312	0.0789736
GO:0030182	neuron differentiation	2	0.665386	0.139087
GO:0000904	cell morphogenesis involved in differentiation	1	0.147864	0.142402
GO:0048812	neuron projection morphogenesis	10	7.76284	0.247993
Cluster 4: gliogenesis
observed gene count: 33
expected gene count: 6.35813183173236
uncorrected p-value: 4.2552202121048e-16
GO ID	term	observed gene count	expected gene count	uncorrected p-value
GO:0019991	septate junction assembly	14	1.99616	1.08359e-09
GO:0035151	regulation of tube size, open tracheal system	11	1.33077	6.74499e-09
GO:0035159	regulation of tube length, open tracheal system	11	1.70043	2.02738e-07
GO:0045216	cell-cell junction organization	3	0.221795	0.000403099
GO:0010001	glial cell differentiation	4	0.813249	0.00643367
GO:0042063	gliogenesis	3	0.443591	0.00680148
GO:0021782	glial cell development	3	0.517522	0.0112519
GO:0035152	regulation of tube architecture, open tracheal system	3	0.961113	0.0659512
GO:0007043	cell-cell junction assembly	1	0.443591	0.369299
Cluster 5: dorsal closure
observed gene count: 72
expected gene count: 27.576548526002
uncorrected p-value: 2.82060101974e-14
GO ID	term	observed gene count	expected gene count	uncorrected p-value
GO:0001745	compound eye morphogenesis	19	6.13634	7.45304e-06
GO:0007163	establishment or maintenance of cell polarity	11	2.36582	1.0401e-05
GO:0042067	establishment of ommatidial polarity	10	2.14402	2.55608e-05
GO:0048598	embryonic morphogenesis	6	0.739318	2.61147e-05
GO:0007164	establishment of tissue polarity	5	0.517522	4.05341e-05
GO:0001738	morphogenesis of a polarized epithelium	6	1.18291	0.000676192
GO:0016318	ommatidial rotation	8	2.07009	0.000710726
GO:0007391	dorsal closure	16	6.57993	0.000742121
GO:0001736	establishment of planar polarity	8	2.21795	0.00117242
GO:0048749	compound eye development	17	8.50215	0.00458921
GO:0002009	morphogenesis of an epithelium	5	1.84829	0.0336133
GO:0001700	embryonic development via the syncytial blastoderm	6	3.69659	0.161769
GO:0009792	embryonic development ending in birth or egg hatching	2	0.739318	0.165699
Cluster 6: eye development
observed gene count: 56
expected gene count: 20.1094402119907
uncorrected p-value: 1.47316701659386e-12
GO ID	term	observed gene count	expected gene count	uncorrected p-value
GO:0001745	compound eye morphogenesis	19	6.13634	7.45304e-06
GO:0042067	establishment of ommatidial polarity	10	2.14402	2.55608e-05
GO:0007423	sensory organ development	12	4.43591	0.00127439
GO:0048749	compound eye development	17	8.50215	0.00458921
GO:0046530	photoreceptor cell differentiation	2	0.295727	0.0296326
GO:0001751	compound eye photoreceptor cell differentiation	5	1.84829	0.0336133
GO:0001654	eye development	2	0.887181	0.220985
Cluster 7: salivary gland development
observed gene count: 24
expected gene count: 4.65770122557138
uncorrected p-value: 5.33462401120647e-12
GO ID	term	observed gene count	expected gene count	uncorrected p-value
GO:0007435	salivary gland morphogenesis	18	3.69659	7.06466e-09
GO:0007431	salivary gland development	10	1.84829	5.48159e-06
Cluster 8: cell adhesion
observed gene count: 38
expected gene count: 11.3115601192448
uncorrected p-value: 1.83599766147832e-11
GO ID	term	observed gene count	expected gene count	uncorrected p-value
GO:0007156	homophilic cell adhesion	17	2.29188	5.14348e-12
GO:0007155	cell adhesion	22	8.79788	5.3505e-05
GO:0016337	cell-cell adhesion	6	1.55257	0.00332787
Cluster 9: respiratory system development
observed gene count: 31
expected gene count: 8.28035773434912
uncorrected p-value: 6.90849928439526e-11
GO ID	term	observed gene count	expected gene count	uncorrected p-value
GO:0007424	open tracheal system development	28	7.83677	1.84725e-09
GO:0035152	regulation of tube architecture, open tracheal system	3	0.961113	0.0659512
GO:0060541	respiratory system development	1	0.0739318	0.0739318
Cluster 10: gastrulation
observed gene count: 33
expected gene count: 10.4243789334217
uncorrected p-value: 2.02229382903761e-09
GO ID	term	observed gene count	expected gene count	uncorrected p-value
GO:0007507	heart development	23	4.28804	5.52449e-12
GO:0008543	fibroblast growth factor receptor signaling pathway	6	0.813249	5.38497e-05
GO:0007509	mesoderm migration	4	0.591454	0.00163354
GO:0007501	mesodermal cell fate specification	4	0.813249	0.00643367
GO:0007369	gastrulation	6	1.84829	0.00842563
GO:0007498	mesoderm development	9	4.95343	0.0573125
GO:0001710	mesodermal cell fate commitment	1	0.443591	0.369299
Cluster 11: regulation of growth
observed gene count: 31
expected gene count: 9.53719774759854
uncorrected p-value: 3.13939945232011e-09
GO ID	term	observed gene count	expected gene count	uncorrected p-value
GO:0045570	regulation of imaginal disc growth	6	0.813249	5.38497e-05
GO:0007274	neuromuscular synaptic transmission	8	2.51368	0.00279335
GO:0050807	regulation of synapse organization	4	0.739318	0.0043463
GO:0046620	regulation of organ growth	5	1.18291	0.00480057
GO:0051963	regulation of synaptogenesis	2	0.147864	0.00546137
GO:0016202	regulation of striated muscle tissue development	3	0.517522	0.0112519
GO:0051960	regulation of nervous system development	2	0.295727	0.0296326
GO:0050803	regulation of synapse structure and activity	3	1.03504	0.0794845
GO:0008582	regulation of synaptic growth at neuromuscular junction	4	1.70043	0.0854708
GO:0040008	regulation of growth	2	1.47864	0.441266
Cluster 12: positive regulation of gene expression
observed gene count: 41
expected gene count: 16.486783703213
uncorrected p-value: 4.55128474789697e-08
GO ID	term	observed gene count	expected gene count	uncorrected p-value
GO:0045944	positive regulation of transcription from RNA polymerase II promoter	33	12.2727	1.40728e-07
GO:0010628	positive regulation of gene expression	8	1.25684	1.15708e-05
GO:0045893	positive regulation of transcription, DNA-dependent	10	5.61881	0.0525533
Cluster 13: cilium assembly
observed gene count: 15
expected gene count: 3.17906591586618
uncorrected p-value: 2.0689101191426e-07
GO ID	term	observed gene count	expected gene count	uncorrected p-value
GO:0042384	cilium assembly	11	2.07009	2.28006e-06
GO:0030031	cell projection assembly	4	1.03504	0.0163293
Cluster 14: tube morphogenesis
observed gene count: 19
expected gene count: 5.39701888042398
uncorrected p-value: 9.43206536906657e-07
GO ID	term	observed gene count	expected gene count	uncorrected p-value
GO:0008543	fibroblast growth factor receptor signaling pathway	6	0.813249	5.38497e-05
GO:0007427	epithelial cell migration, open tracheal system	8	2.29188	0.00147916
GO:0035147	branch fusion, open tracheal system	6	1.55257	0.00332787
GO:0001763	morphogenesis of a branching structure	3	0.517522	0.0112519
GO:0007428	primary branching, open tracheal system	3	1.10898	0.094108
GO:0035239	tube morphogenesis	1	0.295727	0.264542
GO:0060446	branching involved in open tracheal system development	1	0.591454	0.459147
Cluster 15: regulation of axonogenesis
observed gene count: 17
expected gene count: 4.50983769460086
uncorrected p-value: 1.2405872527597e-06
GO ID	term	observed gene count	expected gene count	uncorrected p-value
GO:0050774	negative regulation of dendrite morphogenesis	4	0.517522	0.000867514
GO:0048814	regulation of dendrite morphogenesis	5	1.25684	0.00639245
GO:0050770	regulation of axonogenesis	4	1.18291	0.0263868
GO:0051960	regulation of nervous system development	2	0.295727	0.0296326
GO:0045664	regulation of neuron differentiation	2	0.295727	0.0296326
GO:0045596	negative regulation of cell differentiation	1	0.295727	0.264542
GO:0050768	negative regulation of neurogenesis	1	0.295727	0.264542
GO:0050773	regulation of dendrite development	1	0.369659	0.31893
GO:0050767	regulation of neurogenesis	1	0.591454	0.459147
Cluster 16: metamorphosis
observed gene count: 51
expected gene count: 25.6543226233852
uncorrected p-value: 1.74776299562763e-06
GO ID	term	observed gene count	expected gene count	uncorrected p-value
GO:0007476	imaginal disc-derived wing morphogenesis	36	14.5646	3.48557e-07
GO:0007472	wing disc morphogenesis	4	1.25684	0.0325389
GO:0035220	wing disc development	10	5.24916	0.0352726
GO:0009791	post-embryonic development	1	0.147864	0.142402
GO:0007552	metamorphosis	4	2.66154	0.274307
GO:0007560	imaginal disc morphogenesis	1	0.443591	0.369299
GO:0002165	instar larval or pupal development	1	0.813249	0.570517
GO:0007444	imaginal disc development	2	2.43975	0.712145
Cluster 17: negative regulation of gene expression
observed gene count: 39
expected gene count: 17.5957601854919
uncorrected p-value: 2.03996681356526e-06
GO ID	term	observed gene count	expected gene count	uncorrected p-value
GO:0000122	negative regulation of transcription from RNA polymerase II promoter	24	10.3504	8.80271e-05
GO:0045892	negative regulation of transcription, DNA-dependent	14	6.0624	0.002577
GO:0010629	negative regulation of gene expression	6	4.28804	0.25638
Cluster 18: protein retention in ER lumen
observed gene count: 11
expected gene count: 2.14402119907254
uncorrected p-value: 3.42878043995813e-06
GO ID	term	observed gene count	expected gene count	uncorrected p-value
GO:0006621	protein retention in ER lumen	3	0.221795	0.000403099
GO:0007016	cytoskeletal anchoring at plasma membrane	6	1.25684	0.000980071
GO:0045185	maintenance of protein location	2	0.295727	0.0296326
Cluster 19: sensory organ boundary specification
observed gene count: 9
expected gene count: 1.4786353097052
uncorrected p-value: 5.08657321361318e-06
GO ID	term	observed gene count	expected gene count	uncorrected p-value
GO:0007432	salivary gland boundary specification	6	0.961113	0.000175765
GO:0008052	sensory organ boundary specification	3	0.517522	0.0112519
Cluster 20: head segmentation
observed gene count: 11
expected gene count: 2.29188473004306
uncorrected p-value: 7.31181396749245e-06
GO ID	term	observed gene count	expected gene count	uncorrected p-value
GO:0007379	segment specification	6	1.47864	0.00253352
GO:0007380	specification of segmental identity, head	4	0.813249	0.00643367
GO:0035287	head segmentation	1	0.0739318	0.0739318
Cluster 21: antennal development
observed gene count: 15
expected gene count: 4.14017886717456
uncorrected p-value: 8.90555132771068e-06
GO ID	term	observed gene count	expected gene count	uncorrected p-value
GO:0035214	eye-antennal disc development	4	1.03504	0.0163293
GO:0048800	antennal morphogenesis	4	1.03504	0.0163293
GO:0007469	antennal development	3	0.665386	0.0241501
GO:0007455	eye-antennal disc morphogenesis	5	1.84829	0.0336133
Cluster 22: myoblast fusion
observed gene count: 19
expected gene count: 7.0235177210997
uncorrected p-value: 5.62013565229384e-05
GO ID	term	observed gene count	expected gene count	uncorrected p-value
GO:0050808	synapse organization	5	0.887181	0.00111658
GO:0007520	myoblast fusion	8	2.21795	0.00117242
GO:0007528	neuromuscular junction development	7	2.88334	0.0226339
GO:0048747	muscle fiber development	2	0.591454	0.113545
GO:0007519	skeletal muscle tissue development	1	1.03504	0.65897
Cluster 23: hemopoiesis
observed gene count: 15
expected gene count: 4.87949652202716
uncorrected p-value: 7.30579096825644e-05
GO ID	term	observed gene count	expected gene count	uncorrected p-value
GO:0045610	regulation of hemocyte differentiation	5	0.961113	0.00170458
GO:0042688	crystal cell differentiation	3	0.517522	0.0112519
GO:0030097	hemopoiesis	5	1.55257	0.0164319
GO:0048542	lymph gland development	4	1.33077	0.0394584
GO:0042386	hemocyte differentiation	2	0.517522	0.0894148
GO:0042689	regulation of crystal cell differentiation	1	0.147864	0.142402
GO:0035099	hemocyte migration	3	1.33077	0.143642
Cluster 24: midgut development
observed gene count: 14
expected gene count: 4.50983769460086
uncorrected p-value: 0.000112707381024946
GO ID	term	observed gene count	expected gene count	uncorrected p-value
GO:0007385	specification of segmental identity, abdomen	5	0.517522	4.05341e-05
GO:0007494	midgut development	9	2.21795	0.000220523
GO:0007384	specification of segmental identity, thorax	3	0.221795	0.000403099
GO:0007379	segment specification	6	1.47864	0.00253352
GO:0035292	specification of segmental identity, trunk	1	0.0739318	0.0739318
Cluster 25: neuron fate commitment
observed gene count: 12
expected gene count: 3.54872474329248
uncorrected p-value: 0.000144450553986272
GO ID	term	observed gene count	expected gene count	uncorrected p-value
GO:0046552	photoreceptor cell fate commitment	2	0.147864	0.00546137
GO:0046530	photoreceptor cell differentiation	2	0.295727	0.0296326
GO:0001751	compound eye photoreceptor cell differentiation	5	1.84829	0.0336133
GO:0048663	neuron fate commitment	2	0.443591	0.0670826
GO:0001752	compound eye photoreceptor fate commitment	2	0.665386	0.139087
Cluster 26: ectoderm development
observed gene count: 15
expected gene count: 5.39701888042398
uncorrected p-value: 0.000243018770073081
GO ID	term	observed gene count	expected gene count	uncorrected p-value
GO:0035317	imaginal disc-derived wing hair organization	7	1.33077	0.000182465
GO:0001737	establishment of imaginal disc-derived wing hair orientation	7	1.84829	0.00174379
GO:0035316	non-sensory hair organization	1	0.295727	0.264542
GO:0009913	epidermal cell differentiation	1	0.443591	0.369299
GO:0007398	ectoderm development	2	1.70043	0.515399
GO:0008544	epidermis development	1	1.03504	0.65897
Cluster 27: startle response
observed gene count: 7
expected gene count: 1.40470354421994
uncorrected p-value: 0.00027054684060948
GO ID	term	observed gene count	expected gene count	uncorrected p-value
GO:0048854	brain morphogenesis	7	1.18291	7.48122e-05
GO:0001964	startle response	6	1.03504	0.000288384
GO:0031987	locomotion involved in locomotory behavior	6	1.18291	0.000676192
Cluster 28: negative chemotaxis
observed gene count: 10
expected gene count: 2.80940708843988
uncorrected p-value: 0.000327190903281745
GO ID	term	observed gene count	expected gene count	uncorrected p-value
GO:0016200	synaptic target attraction	4	0.369659	0.000139876
GO:0008039	synaptic target recognition	7	2.29188	0.00646519
GO:0050919	negative chemotaxis	1	0.0739318	0.0739318
Cluster 29: gonad development
observed gene count: 17
expected gene count: 6.87565419012918
uncorrected p-value: 0.000419986829103115
GO ID	term	observed gene count	expected gene count	uncorrected p-value
GO:0008406	gonad development	10	2.43975	8.99529e-05
GO:0008585	female gonad development	4	0.813249	0.00643367
GO:0007506	gonadal mesoderm development	3	0.591454	0.017023
GO:0008354	germ cell migration	6	2.51368	0.0363847
GO:0007280	pole cell migration	4	1.70043	0.0854708
GO:0007548	sex differentiation	2	1.18291	0.33365
Cluster 30: leg disc development
observed gene count: 9
expected gene count: 2.51368002649884
uncorrected p-value: 0.00061804791485754
GO ID	term	observed gene count	expected gene count	uncorrected p-value
GO:0007479	leg disc proximal/distal pattern formation	6	1.18291	0.000676192
GO:0009954	proximal/distal pattern formation	1	0.0739318	0.0739318
GO:0035223	leg disc pattern formation	1	0.147864	0.142402
GO:0007449	proximal/distal pattern formation, imaginal disc	1	0.221795	0.205814
GO:0035218	leg disc development	1	0.591454	0.459147
GO:0007447	imaginal disc pattern formation	1	0.813249	0.570517
Cluster 31: growth
observed gene count: 13
expected gene count: 4.87949652202716
uncorrected p-value: 0.000943833605487568
GO ID	term	observed gene count	expected gene count	uncorrected p-value
GO:0048675	axon extension	7	1.47864	0.000389812
GO:0040007	growth	4	1.55257	0.0648268
GO:0008361	regulation of cell size	3	1.10898	0.094108
GO:0048589	developmental growth	1	0.295727	0.264542
GO:0016049	cell growth	1	1.03504	0.65897
Cluster 32: cytoskeleton organization
observed gene count: 21
expected gene count: 10.1286518714806
uncorrected p-value: 0.00109653679902582
GO ID	term	observed gene count	expected gene count	uncorrected p-value
GO:0030036	actin cytoskeleton organization	11	3.69659	0.00087903
GO:0007015	actin filament organization	12	5.10129	0.00434926
GO:0007010	cytoskeleton organization	5	3.17907	0.209649
Cluster 33: neuromuscular synaptic transmission
observed gene count: 9
expected gene count: 2.9572706194104
uncorrected p-value: 0.00215763788507201
GO ID	term	observed gene count	expected gene count	uncorrected p-value
GO:0007274	neuromuscular synaptic transmission	8	2.51368	0.00279335
GO:0050804	regulation of synaptic transmission	1	0.443591	0.369299
Cluster 34: genital disc development
observed gene count: 6
expected gene count: 1.62649884067572
uncorrected p-value: 0.00429367375122772
GO ID	term	observed gene count	expected gene count	uncorrected p-value
GO:0035215	genital disc development	4	1.03504	0.0163293
GO:0035225	determination of genital disc primordium	3	0.739318	0.0326374
Cluster 35: regulation of cytoskeleton organization
observed gene count: 5
expected gene count: 1.18290824776416
uncorrected p-value: 0.00480057158086843
GO ID	term	observed gene count	expected gene count	uncorrected p-value
GO:0007026	negative regulation of microtubule depolymerization	4	0.517522	0.000867514
GO:0051493	regulation of cytoskeleton organization	1	0.369659	0.31893
Cluster 36: phosphorylation
observed gene count: 31
expected gene count: 19.1483272606823
uncorrected p-value: 0.00534191866030677
GO ID	term	observed gene count	expected gene count	uncorrected p-value
GO:0006468	protein amino acid phosphorylation	30	17.2261	0.00206128
GO:0016310	phosphorylation	1	1.92223	0.86449
Cluster 37: leg disc development
observed gene count: 11
expected gene count: 4.65770122557138
uncorrected p-value: 0.00601261051741612
GO ID	term	observed gene count	expected gene count	uncorrected p-value
GO:0007480	imaginal disc-derived leg morphogenesis	11	4.06625	0.00200544
GO:0035218	leg disc development	1	0.591454	0.459147
Cluster 38: R7 cell differentiation
observed gene count: 8
expected gene count: 2.88333885392514
uncorrected p-value: 0.00681763755033442
GO ID	term	observed gene count	expected gene count	uncorrected p-value
GO:0046552	photoreceptor cell fate commitment	2	0.147864	0.00546137
GO:0045466	R7 cell differentiation	3	0.665386	0.0241501
GO:0048056	R3/R4 cell differentiation	1	0.0739318	0.0739318
GO:0007464	R3/R4 cell fate commitment	3	1.18291	0.109736
GO:0001752	compound eye photoreceptor fate commitment	2	0.665386	0.139087
GO:0007465	R7 cell fate commitment	2	0.961113	0.249172
Cluster 39: genitalia development
observed gene count: 5
expected gene count: 1.33077177873468
uncorrected p-value: 0.00832074451821852
GO ID	term	observed gene count	expected gene count	uncorrected p-value
GO:0035215	genital disc development	4	1.03504	0.0163293
GO:0007484	imaginal disc-derived genitalia development	1	0.0739318	0.0739318
GO:0048806	genitalia development	1	0.295727	0.264542
Cluster 40: rhabdomere development
observed gene count: 10
expected gene count: 4.28804239814508
uncorrected p-value: 0.00941948436841535
GO ID	term	observed gene count	expected gene count	uncorrected p-value
GO:0046530	photoreceptor cell differentiation	2	0.295727	0.0296326
GO:0042051	compound eye photoreceptor development	4	1.70043	0.0854708
GO:0042052	rhabdomere development	5	2.43975	0.0928523
GO:0042461	photoreceptor cell development	1	0.221795	0.205814
Cluster 41: cell motion
observed gene count: 6
expected gene count: 1.92222590261676
uncorrected p-value: 0.0102825302589296
GO ID	term	observed gene count	expected gene count	uncorrected p-value
GO:0016477	cell migration	5	1.70043	0.0240437
GO:0006928	cell motion	2	0.295727	0.0296326
Cluster 42: induction of apoptosis
observed gene count: 12
expected gene count: 5.69274594236502
uncorrected p-value: 0.0105502996910966
GO ID	term	observed gene count	expected gene count	uncorrected p-value
GO:0006917	induction of apoptosis	4	1.4047	0.0471493
GO:0010942	positive regulation of cell death	1	0.0739318	0.0739318
GO:0042981	regulation of apoptosis	3	1.47864	0.180463
GO:0043068	positive regulation of programmed cell death	1	0.369659	0.31893
GO:0010941	regulation of cell death	1	0.443591	0.369299
GO:0043069	negative regulation of programmed cell death	1	0.517522	0.415946
GO:0043065	positive regulation of apoptosis	1	0.665386	0.499154
GO:0060548	negative regulation of cell death	1	0.813249	0.570517
Cluster 43: border follicle cell migration
observed gene count: 18
expected gene count: 10.0547201059954
uncorrected p-value: 0.0113387114390197
GO ID	term	observed gene count	expected gene count	uncorrected p-value
GO:0030707	ovarian follicle cell development	10	3.99232	0.00564145
GO:0007298	border follicle cell migration	12	6.87565	0.0409189
Cluster 44: wing disc pattern formation
observed gene count: 14
expected gene count: 7.17138125207022
uncorrected p-value: 0.0117384174062512
GO ID	term	observed gene count	expected gene count	uncorrected p-value
GO:0009953	dorsal/ventral pattern formation	5	1.99616	0.0452492
GO:0048190	wing disc dorsal/ventral pattern formation	5	3.47479	0.265651
GO:0035222	wing disc pattern formation	2	1.03504	0.277454
GO:0007450	dorsal/ventral pattern formation, imaginal disc	1	0.739318	0.536205
GO:0007447	imaginal disc pattern formation	1	0.813249	0.570517
Cluster 45: endocytosis
observed gene count: 35
expected gene count: 23.879960251739
uncorrected p-value: 0.0145881896976671
GO ID	term	observed gene count	expected gene count	uncorrected p-value
GO:0016192	vesicle-mediated transport	13	6.35813	0.0102436
GO:0006911	phagocytosis, engulfment	18	13.2338	0.112964
GO:0006909	phagocytosis	2	1.33077	0.388507
GO:0006897	endocytosis	3	3.10513	0.609457
GO:0016044	membrane organization	1	0.961113	0.631719
Cluster 46: segmentation
observed gene count: 18
expected gene count: 10.4243789334217
uncorrected p-value: 0.0160597765783857
GO ID	term	observed gene count	expected gene count	uncorrected p-value
GO:0007389	pattern specification process	4	1.55257	0.0648268
GO:0009880	embryonic pattern specification	4	1.6265	0.0747879
GO:0009948	anterior/posterior axis specification	2	0.517522	0.0894148
GO:0009798	axis specification	2	0.591454	0.113545
GO:0009952	anterior/posterior pattern formation	3	1.33077	0.143642
GO:0008293	torso signaling pathway	3	2.51368	0.464851
GO:0035282	segmentation	1	1.03504	0.65897
GO:0008595	determination of anterior/posterior axis, embryo	2	2.73548	0.769794
GO:0007350	blastoderm segmentation	1	1.6265	0.815662
Cluster 47: JNK cascade
observed gene count: 9
expected gene count: 3.99231533620404
uncorrected p-value: 0.0166199274709921
GO ID	term	observed gene count	expected gene count	uncorrected p-value
GO:0000165	MAPKKK cascade	3	0.739318	0.0326374
GO:0007254	JNK cascade	5	1.84829	0.0336133
GO:0046529	imaginal disc fusion, thorax closure	3	1.03504	0.0794845
GO:0051017	actin filament bundle formation	3	1.18291	0.109736
Cluster 48: oligosaccharide metabolic process
observed gene count: 5
expected gene count: 1.62649884067572
uncorrected p-value: 0.0200019516522462
GO ID	term	observed gene count	expected gene count	uncorrected p-value
GO:0009312	oligosaccharide biosynthetic process	3	0.961113	0.0659512
GO:0009311	oligosaccharide metabolic process	1	0.295727	0.264542
GO:0016051	carbohydrate biosynthetic process	1	0.369659	0.31893
Cluster 49: apoptosis
observed gene count: 9
expected gene count: 4.21411063265982
uncorrected p-value: 0.0230984525680438
GO ID	term	observed gene count	expected gene count	uncorrected p-value
[truncated: 421 more rows]

## Sheet: Embryo14-16h
sample name: Embryo14-16h
[truncated: 432 more rows]

[truncated: 22 more sheets: Embryo16-18h, Embryo18-20h, Embryo20-22h, Embryo22-24h, L1, L2, L3+12h, L3PS1-2, L3PS3-6, L3PS7-9, Prepupae, Prepupae+12h, Prepupae+24h, Prepupae+2d, Prepupae+3d, Prepupae+4d, Male+1d, Male+5d, Male+30d, Female+1d …]
