# Supplementary material for: Comparison of D. melanogaster and C. elegans developmental stages, tissues, and cells by modENCODE RNA-seq data
Source: HighWire-hosted journal article supplement (doi:10.1101/gr.170100.113), 2014-07-01
Supplement: Supplemental_Files.zip [file TableS5B FlyTissueAllClusters.xls]

## Sheet: CarcassL3
sample name: CarcassL3
number of associated genes in the sample: 701
Cluster 1: leg disc development
observed gene count: 19
expected gene count: 1.5789334216628
uncorrected p-value: 3.55935333846133e-17
GO ID	term	observed gene count	expected gene count	uncorrected p-value
GO:0007479	leg disc proximal/distal pattern formation	10	0.743027	2.72215e-10
GO:0007449	proximal/distal pattern formation, imaginal disc	3	0.139318	9.97425e-05
GO:0007447	imaginal disc pattern formation	4	0.510831	0.0011711
GO:0035223	leg disc pattern formation	2	0.0928784	0.00215367
GO:0035218	leg disc development	3	0.371514	0.00468573
GO:0009954	proximal/distal pattern formation	1	0.0464392	0.0464392
Cluster 2: regulation of tube size, open tracheal system
observed gene count: 20
expected gene count: 2.1826432593574
uncorrected p-value: 4.99505591124456e-15
GO ID	term	observed gene count	expected gene count	uncorrected p-value
GO:0035159	regulation of tube length, open tracheal system	13	1.0681	3.11716e-12
GO:0035152	regulation of tube architecture, open tracheal system	6	0.60371	1.27289e-05
GO:0035151	regulation of tube size, open tracheal system	6	0.835906	0.000112756
Cluster 3: open tracheal system development
observed gene count: 28
expected gene count: 5.20119244783041
uncorrected p-value: 1.34484346912408e-13
GO ID	term	observed gene count	expected gene count	uncorrected p-value
GO:0007424	open tracheal system development	25	4.92256	1.11619e-11
GO:0035152	regulation of tube architecture, open tracheal system	6	0.60371	1.27289e-05
Cluster 4: regulation of transcription, DNA-dependent
observed gene count: 57
expected gene count: 21.0834051010268
uncorrected p-value: 6.37719719570051e-12
GO ID	term	observed gene count	expected gene count	uncorrected p-value
GO:0006355	regulation of transcription, DNA-dependent	45	16.4395	7.70132e-10
GO:0006357	regulation of transcription from RNA polymerase II promoter	16	5.85134	0.000239472
Cluster 5: negative regulation of gene expression
observed gene count: 47
expected gene count: 15.4642596886386
uncorrected p-value: 8.26247547503998e-12
GO ID	term	observed gene count	expected gene count	uncorrected p-value
GO:0000122	negative regulation of transcription from RNA polymerase II promoter	25	6.50149	5.81596e-09
GO:0010629	negative regulation of gene expression	12	2.69347	1.14141e-05
GO:0006357	regulation of transcription from RNA polymerase II promoter	16	5.85134	0.000239472
GO:0045892	negative regulation of transcription, DNA-dependent	12	3.80802	0.00038283
Cluster 6: eye development
observed gene count: 42
expected gene count: 13.4209340841338
uncorrected p-value: 4.26641649919398e-11
GO ID	term	observed gene count	expected gene count	uncorrected p-value
GO:0007423	sensory organ development	14	2.78635	4.5345e-07
GO:0001745	compound eye morphogenesis	14	3.85446	2.57047e-05
GO:0001751	compound eye photoreceptor cell differentiation	7	1.16098	0.000104294
GO:0048749	compound eye development	14	5.34051	0.000881164
GO:0045465	R8 cell differentiation	3	0.278635	0.00179483
GO:0048592	eye morphogenesis	3	0.371514	0.00468573
GO:0001752	compound eye photoreceptor fate commitment	3	0.417953	0.00678769
GO:0045464	R8 cell fate specification	3	0.464392	0.00936518
GO:0007460	R8 cell fate commitment	2	0.325075	0.0387119
GO:0043704	photoreceptor cell fate specification	1	0.0928784	0.0907248
GO:0048665	neuron fate specification	1	0.325075	0.283181
GO:0001654	eye development	1	0.557271	0.434948
GO:0042051	compound eye photoreceptor development	1	1.0681	0.665298
Cluster 7: leg disc development
observed gene count: 39
expected gene count: 12.4921497184498
uncorrected p-value: 2.30394357429994e-10
GO ID	term	observed gene count	expected gene count	uncorrected p-value
GO:0007480	imaginal disc-derived leg morphogenesis	14	2.55416	1.41208e-07
GO:0016348	imaginal disc-derived leg joint morphogenesis	6	0.510831	3.71314e-06
GO:0045944	positive regulation of transcription from RNA polymerase II promoter	21	7.70891	2.87236e-05
GO:0007478	leg disc morphogenesis	2	0.0928784	0.00215367
GO:0035218	leg disc development	3	0.371514	0.00468573
GO:0045893	positive regulation of transcription, DNA-dependent	4	3.52938	0.472661
Cluster 8: genital disc development
observed gene count: 20
expected gene count: 3.71513746273601
uncorrected p-value: 4.25118280947453e-10
GO ID	term	observed gene count	expected gene count	uncorrected p-value
GO:0035215	genital disc development	7	0.650149	1.16586e-06
GO:0035277	spiracle morphogenesis, open tracheal system	8	0.928784	1.59251e-06
GO:0035288	anterior head segmentation	5	0.325075	4.13712e-06
GO:0048100	wing disc anterior/posterior pattern formation	5	0.557271	0.000128374
GO:0007448	anterior/posterior pattern formation, imaginal disc	4	0.371514	0.000277868
GO:0035224	genital disc anterior/posterior pattern formation	4	0.371514	0.000277868
GO:0007418	ventral midline development	4	0.417953	0.000481798
GO:0035289	posterior head segmentation	4	0.464392	0.000773559
GO:0007380	specification of segmental identity, head	3	0.510831	0.012438
Cluster 9: metamorphosis
observed gene count: 45
expected gene count: 16.8574362371646
uncorrected p-value: 1.72919230899565e-09
GO ID	term	observed gene count	expected gene count	uncorrected p-value
GO:0007476	imaginal disc-derived wing morphogenesis	25	9.14853	4.84175e-06
GO:0035220	wing disc development	9	3.29718	0.00540705
GO:0007552	metamorphosis	5	1.67181	0.0243603
GO:0007472	wing disc morphogenesis	3	0.789467	0.041704
GO:0035114	imaginal disc-derived appendage morphogenesis	1	0.0464392	0.0464392
GO:0007389	pattern specification process	3	0.975224	0.0712188
GO:0007444	imaginal disc development	3	1.53249	0.196294
Cluster 10: wing disc pattern formation
observed gene count: 14
expected gene count: 2.3684001324942
uncorrected p-value: 4.98338653489344e-08
GO ID	term	observed gene count	expected gene count	uncorrected p-value
GO:0007367	segment polarity determination	8	1.20742	1.54081e-05
GO:0048100	wing disc anterior/posterior pattern formation	5	0.557271	0.000128374
GO:0007448	anterior/posterior pattern formation, imaginal disc	4	0.371514	0.000277868
GO:0048099	anterior/posterior lineage restriction, imaginal disc	3	0.185757	0.000385131
GO:0035222	wing disc pattern formation	2	0.650149	0.135657
Cluster 11: cell adhesion
observed gene count: 25
expected gene count: 7.29095727061941
uncorrected p-value: 6.27603313985818e-08
GO ID	term	observed gene count	expected gene count	uncorrected p-value
GO:0016339	calcium-dependent cell-cell adhesion	10	1.0681	2.89003e-08
GO:0007156	homophilic cell adhesion	11	1.43962	7.2388e-08
GO:0007155	cell adhesion	15	5.52627	0.000402175
GO:0016337	cell-cell adhesion	3	0.975224	0.0712188
Cluster 12: eye morphogenesis
observed gene count: 27
expected gene count: 8.68413381914541
uncorrected p-value: 1.51122926476589e-07
GO ID	term	observed gene count	expected gene count	uncorrected p-value
GO:0042067	establishment of ommatidial polarity	11	1.34674	3.221e-08
GO:0001736	establishment of planar polarity	10	1.39318	5.64405e-07
GO:0001745	compound eye morphogenesis	14	3.85446	2.57047e-05
GO:0001737	establishment of imaginal disc-derived wing hair orientation	7	1.16098	0.000104294
GO:0016318	ommatidial rotation	6	1.3003	0.00153847
GO:0007164	establishment of tissue polarity	3	0.325075	0.00303278
GO:0048592	eye morphogenesis	3	0.371514	0.00468573
GO:0001738	morphogenesis of a polarized epithelium	3	0.743027	0.0355378
GO:0007163	establishment or maintenance of cell polarity	3	1.48605	0.18436
GO:0002009	morphogenesis of an epithelium	2	1.16098	0.32461
Cluster 13: sensory organ boundary specification
observed gene count: 9
expected gene count: 1.1145412388208
uncorrected p-value: 6.65525843759766e-07
GO ID	term	observed gene count	expected gene count	uncorrected p-value
GO:0016360	sensory organ precursor cell fate determination	7	0.975224	2.96841e-05
GO:0008052	sensory organ boundary specification	2	0.325075	0.0387119
Cluster 14: antennal development
observed gene count: 13
expected gene count: 2.6005962239152
uncorrected p-value: 1.24300169790959e-06
GO ID	term	observed gene count	expected gene count	uncorrected p-value
GO:0048800	antennal morphogenesis	5	0.650149	0.000300236
GO:0007455	eye-antennal disc morphogenesis	5	1.16098	0.00521408
GO:0035214	eye-antennal disc development	3	0.650149	0.0247395
GO:0007469	antennal development	2	0.417953	0.0624157
Cluster 15: proteolysis
observed gene count: 55
expected gene count: 28.8387545544882
uncorrected p-value: 3.08549936817975e-06
GO ID	term	observed gene count	expected gene count	uncorrected p-value
GO:0030163	protein catabolic process	7	0.975224	2.96841e-05
GO:0006508	proteolysis	47	25.3558	3.36522e-05
GO:0006511	ubiquitin-dependent protein catabolic process	13	3.6687	6.48646e-05
GO:0051603	proteolysis involved in cellular protein catabolic process	4	0.371514	0.000277868
Cluster 16: cardioblast differentiation
observed gene count: 9
expected gene count: 1.3467373302418
uncorrected p-value: 4.13484371366177e-06
GO ID	term	observed gene count	expected gene count	uncorrected p-value
GO:0035050	embryonic heart tube development	4	0.789467	0.00676202
GO:0010002	cardioblast differentiation	3	0.417953	0.00678769
GO:0035051	cardiac cell differentiation	2	0.325075	0.0387119
Cluster 17: regulation of cell fate specification
observed gene count: 7
expected gene count: 0.789466710831401
uncorrected p-value: 5.84420097603158e-06
GO ID	term	observed gene count	expected gene count	uncorrected p-value
GO:0042659	regulation of cell fate specification	6	0.417953	7.31585e-07
GO:0009996	negative regulation of cell fate specification	1	0.232196	0.211634
Cluster 18: imaginal disc growth
observed gene count: 15
expected gene count: 4.22596886386221
uncorrected p-value: 1.77346258227885e-05
GO ID	term	observed gene count	expected gene count	uncorrected p-value
GO:0007474	imaginal disc-derived wing vein specification	8	1.99689	0.000711048
GO:0007446	imaginal disc growth	5	0.789467	0.000826175
GO:0007440	foregut morphogenesis	4	0.510831	0.0011711
GO:0007473	wing disc proximal/distal pattern formation	3	0.278635	0.00179483
GO:0042127	regulation of cell proliferation	4	1.43962	0.0537081
Cluster 19: gut development
observed gene count: 9
expected gene count: 1.625372639947
uncorrected p-value: 2.26897760315924e-05
GO ID	term	observed gene count	expected gene count	uncorrected p-value
GO:0048619	embryonic hindgut morphogenesis	3	0.232196	0.000929507
GO:0007440	foregut morphogenesis	4	0.510831	0.0011711
GO:0007442	hindgut morphogenesis	5	0.882345	0.00143707
GO:0007473	wing disc proximal/distal pattern formation	3	0.278635	0.00179483
GO:0048565	gut development	1	0.139318	0.132956
GO:0048567	ectodermal gut morphogenesis	1	0.185757	0.173229
Cluster 20: ectoderm development
observed gene count: 15
expected gene count: 4.59748261013581
uncorrected p-value: 4.93561229003136e-05
GO ID	term	observed gene count	expected gene count	uncorrected p-value
GO:0001737	establishment of imaginal disc-derived wing hair orientation	7	1.16098	0.000104294
GO:0008544	epidermis development	5	0.650149	0.000300236
GO:0007398	ectoderm development	5	1.0681	0.00356535
GO:0035316	non-sensory hair organization	1	0.185757	0.173229
GO:0007163	establishment or maintenance of cell polarity	3	1.48605	0.18436
Cluster 21: determination of genital disc primordium
observed gene count: 6
expected gene count: 0.789466710831401
uncorrected p-value: 7.82309131542948e-05
GO ID	term	observed gene count	expected gene count	uncorrected p-value
GO:0007448	anterior/posterior pattern formation, imaginal disc	4	0.371514	0.000277868
GO:0035225	determination of genital disc primordium	3	0.464392	0.00936518
Cluster 22: chitin-based cuticle development
observed gene count: 15
expected gene count: 4.78323948327261
uncorrected p-value: 7.87953993502302e-05
GO ID	term	observed gene count	expected gene count	uncorrected p-value
GO:0008362	chitin-based embryonic cuticle biosynthetic process	8	0.789467	3.4805e-07
GO:0040005	chitin-based cuticle attachment to epithelium	3	0.139318	9.97425e-05
GO:0007475	apposition of dorsal and ventral imaginal disc-derived wing surfaces	3	0.835906	0.0483689
GO:0040003	chitin-based cuticle development	5	2.18264	0.0657044
GO:0008587	imaginal disc-derived wing margin morphogenesis	3	1.25386	0.128155
Cluster 23: positive regulation of transcription, DNA-dependent
observed gene count: 24
expected gene count: 10.3559456773766
uncorrected p-value: 0.000112508315520986
GO ID	term	observed gene count	expected gene count	uncorrected p-value
GO:0045944	positive regulation of transcription from RNA polymerase II promoter	21	7.70891	2.87236e-05
GO:0045893	positive regulation of transcription, DNA-dependent	4	3.52938	0.472661
Cluster 24: Bolwig's organ morphogenesis
observed gene count: 8
expected gene count: 1.625372639947
uncorrected p-value: 0.000160201725346194
GO ID	term	observed gene count	expected gene count	uncorrected p-value
GO:0001746	Bolwig's organ morphogenesis	5	0.417953	2.29562e-05
GO:0007224	smoothened signaling pathway	6	1.39318	0.00224071
Cluster 25: instar larval development
observed gene count: 8
expected gene count: 1.857568731368
uncorrected p-value: 0.000426370404031814
GO ID	term	observed gene count	expected gene count	uncorrected p-value
GO:0008363	larval chitin-based cuticle development	5	0.60371	0.000200652
GO:0002168	instar larval development	3	1.25386	0.128155
Cluster 26: regulation of neurogenesis
observed gene count: 5
expected gene count: 0.696588274263001
uncorrected p-value: 0.000433219919730079
GO ID	term	observed gene count	expected gene count	uncorrected p-value
GO:0051960	regulation of nervous system development	2	0.185757	0.0121379
GO:0045664	regulation of neuron differentiation	2	0.185757	0.0121379
GO:0050767	regulation of neurogenesis	2	0.371514	0.0500539
Cluster 27: trunk segmentation
observed gene count: 10
expected gene count: 2.8327923153362
uncorrected p-value: 0.00046064874856768
GO ID	term	observed gene count	expected gene count	uncorrected p-value
GO:0007384	specification of segmental identity, thorax	3	0.139318	9.97425e-05
GO:0035290	trunk segmentation	4	0.464392	0.000773559
GO:0007385	specification of segmental identity, abdomen	3	0.325075	0.00303278
GO:0007494	midgut development	5	1.39318	0.0115566
GO:0035292	specification of segmental identity, trunk	1	0.0464392	0.0464392
GO:0007379	segment specification	2	0.928784	0.237333
Cluster 28: wound healing
observed gene count: 10
expected gene count: 2.8792315336204
uncorrected p-value: 0.000526790539252839
GO ID	term	observed gene count	expected gene count	uncorrected p-value
GO:0042246	tissue regeneration	4	0.510831	0.0011711
GO:0009611	response to wounding	3	0.417953	0.00678769
GO:0042060	wound healing	4	2.04333	0.14623
Cluster 29: border follicle cell migration
observed gene count: 16
expected gene count: 6.31573368665121
uncorrected p-value: 0.000570772474898029
GO ID	term	observed gene count	expected gene count	uncorrected p-value
GO:0030707	ovarian follicle cell development	7	2.50772	0.0119949
GO:0007297	ovarian follicle cell migration	3	0.510831	0.012438
GO:0007298	border follicle cell migration	9	4.31885	0.0285866
Cluster 30: chitin metabolic process
observed gene count: 12
expected gene count: 4.22596886386221
uncorrected p-value: 0.000997039073632422
GO ID	term	observed gene count	expected gene count	uncorrected p-value
GO:0006030	chitin metabolic process	12	4.22597	0.000997039
Cluster 31: genitalia development
observed gene count: 6
expected gene count: 1.2074196753892
uncorrected p-value: 0.00101756665459897
GO ID	term	observed gene count	expected gene count	uncorrected p-value
GO:0048806	genitalia development	3	0.185757	0.000385131
GO:0007485	imaginal disc-derived male genitalia development	3	0.325075	0.00303278
Cluster 32: torso signaling pathway
observed gene count: 11
expected gene count: 3.71513746273601
uncorrected p-value: 0.00112894931899619
GO ID	term	observed gene count	expected gene count	uncorrected p-value
GO:0007362	terminal region determination	5	1.25386	0.00733954
GO:0007354	zygotic determination of anterior/posterior axis, embryo	2	0.371514	0.0500539
GO:0007173	epidermal growth factor receptor signaling pathway	4	1.48605	0.0592183
GO:0008293	torso signaling pathway	4	1.57893	0.0711008
GO:0007169	transmembrane receptor protein tyrosine kinase signaling pathway	1	0.696588	0.510133
Cluster 33: cell migration
observed gene count: 7
expected gene count: 1.7182510765154
uncorrected p-value: 0.00137521222623246
GO ID	term	observed gene count	expected gene count	uncorrected p-value
GO:0007297	ovarian follicle cell migration	3	0.510831	0.012438
GO:0016477	cell migration	4	1.0681	0.0201897
Cluster 34: neuroblast fate determination
observed gene count: 6
expected gene count: 1.3002981119576
uncorrected p-value: 0.00153847356918658
GO ID	term	observed gene count	expected gene count	uncorrected p-value
GO:0007400	neuroblast fate determination	6	1.25386	0.00125754
Cluster 35: regulation of compound eye pigmentation
observed gene count: 3
expected gene count: 0.2786353097052
uncorrected p-value: 0.00179483411880608
GO ID	term	observed gene count	expected gene count	uncorrected p-value
GO:0048076	regulation of compound eye pigmentation	3	0.232196	0.000929507
Cluster 36: response to ecdysone
observed gene count: 12
expected gene count: 4.55104339185161
uncorrected p-value: 0.00191194105829891
GO ID	term	observed gene count	expected gene count	uncorrected p-value
GO:0035072	ecdysone-mediated induction of salivary gland cell autophagic cell death	4	0.417953	0.000481798
GO:0035075	response to ecdysone	3	0.557271	0.0160198
GO:0035071	salivary gland cell autophagic cell death	7	3.06499	0.0328655
GO:0048102	autophagic cell death	5	2.64704	0.1242
GO:0043068	positive regulation of programmed cell death	1	0.232196	0.211634
GO:0010941	regulation of cell death	1	0.278635	0.248257
GO:0035070	salivary gland histolysis	1	0.371514	0.316485
Cluster 37: muscle organ development
observed gene count: 10
expected gene count: 3.52938058959921
uncorrected p-value: 0.00261313389832111
GO ID	term	observed gene count	expected gene count	uncorrected p-value
GO:0048738	cardiac muscle tissue development	3	0.139318	9.97425e-05
GO:0007519	skeletal muscle tissue development	5	0.650149	0.000300236
GO:0007517	muscle organ development	6	2.92567	0.0714579
GO:0060537	muscle tissue development	1	0.185757	0.173229
Cluster 38: axonogenesis
observed gene count: 29
expected gene count: 16.9038754554488
uncorrected p-value: 0.00333929617989294
GO ID	term	observed gene count	expected gene count	uncorrected p-value
GO:0007411	axon guidance	19	7.19808	0.000104616
GO:0000904	cell morphogenesis involved in differentiation	2	0.0928784	0.00215367
GO:0007409	axonogenesis	7	2.32196	0.00793015
GO:0048666	neuron development	5	1.90401	0.0401347
GO:0048667	cell morphogenesis involved in neuron differentiation	1	0.0464392	0.0464392
GO:0030182	neuron differentiation	1	0.417953	0.348244
GO:0000902	cell morphogenesis	3	2.18264	0.37382
Cluster 39: myofibril assembly
observed gene count: 16
expected gene count: 7.75534945346141
uncorrected p-value: 0.00483444161806119
GO ID	term	observed gene count	expected gene count	uncorrected p-value
GO:0045214	sarcomere organization	5	0.835906	0.00110057
GO:0030239	myofibril assembly	3	0.325075	0.00303278
GO:0048747	muscle fiber development	2	0.371514	0.0500539
GO:0007010	cytoskeleton organization	4	1.99689	0.137664
GO:0007015	actin filament organization	3	3.20431	0.627531
GO:0030036	actin cytoskeleton organization	1	2.32196	0.907594
Cluster 40: regulation of growth
observed gene count: 7
expected gene count: 2.1362040410732
uncorrected p-value: 0.00498415245712822
GO ID	term	observed gene count	expected gene count	uncorrected p-value
GO:0040008	regulation of growth	4	0.928784	0.0123277
GO:0046620	regulation of organ growth	3	0.743027	0.0355378
GO:0045570	regulation of imaginal disc growth	2	0.510831	0.0897317
Cluster 41: dopamine metabolic process
observed gene count: 5
expected gene count: 1.2074196753892
uncorrected p-value: 0.00621324635309816
GO ID	term	observed gene count	expected gene count	uncorrected p-value
GO:0048066	pigmentation during development	5	0.60371	0.000200652
GO:0042417	dopamine metabolic process	2	0.278635	0.0285178
GO:0006584	catecholamine metabolic process	2	0.371514	0.0500539
GO:0009072	aromatic amino acid family metabolic process	1	0.278635	0.248257
Cluster 42: asymmetric cell division
observed gene count: 10
expected gene count: 4.08665120900961
uncorrected p-value: 0.00752786212043383
GO ID	term	observed gene count	expected gene count	uncorrected p-value
GO:0048100	wing disc anterior/posterior pattern formation	5	0.557271	0.000128374
GO:0048103	somatic stem cell division	3	0.417953	0.00678769
GO:0042078	germ-line stem cell division	4	0.975224	0.0146805
GO:0030718	germ-line stem cell maintenance	4	1.71825	0.0910087
GO:0008356	asymmetric cell division	3	1.11454	0.097993
GO:0048863	stem cell differentiation	1	0.232196	0.211634
Cluster 43: mesoderm morphogenesis
observed gene count: 6
expected gene count: 1.7646902947996
uncorrected p-value: 0.00760923483939507
GO ID	term	observed gene count	expected gene count	uncorrected p-value
GO:0007501	mesodermal cell fate specification	5	0.510831	7.78575e-05
GO:0048332	mesoderm morphogenesis	1	0.0464392	0.0464392
Cluster 44: learning
observed gene count: 12
expected gene count: 5.43338853925141
uncorrected p-value: 0.00814103550093889
GO ID	term	observed gene count	expected gene count	uncorrected p-value
GO:0042048	olfactory behavior	6	1.99689	0.0138268
GO:0007611	learning or memory	5	1.81113	0.0332346
GO:0008038	neuron recognition	2	0.325075	0.0387119
GO:0008355	olfactory learning	4	2.50772	0.241281
GO:0007612	learning	1	0.60371	0.46121
Cluster 45: epithelial tube morphogenesis
observed gene count: 6
expected gene count: 1.8111295130838
uncorrected p-value: 0.00864804593916171
GO ID	term	observed gene count	expected gene count	uncorrected p-value
GO:0035147	branch fusion, open tracheal system	4	0.975224	0.0146805
GO:0060562	epithelial tube morphogenesis	1	0.0464392	0.0464392
GO:0048754	branching morphogenesis of a tube	1	0.0928784	0.0907248
GO:0001763	morphogenesis of a branching structure	1	0.325075	0.283181
Cluster 46: oogenesis
observed gene count: 29
expected gene count: 18.1577343491222
uncorrected p-value: 0.00889672554653218
GO ID	term	observed gene count	expected gene count	uncorrected p-value
GO:0007313	maternal specification of dorsal/ventral axis, oocyte, soma encoded	4	0.278635	6.41807e-05
GO:0009952	anterior/posterior pattern formation	4	0.835906	0.00837957
GO:0016485	protein processing	4	0.835906	0.00837957
GO:0009880	embryonic pattern specification	4	1.02166	0.0172985
GO:0009798	axis specification	2	0.371514	0.0500539
GO:0007354	zygotic determination of anterior/posterior axis, embryo	2	0.371514	0.0500539
GO:0048477	oogenesis	14	9.2414	0.0803145
GO:0007281	germ cell development	3	1.39318	0.161119
GO:0007315	pole plasm assembly	2	0.743027	0.168557
GO:0045451	pole plasm oskar mRNA localization	3	1.43962	0.172628
GO:0008595	determination of anterior/posterior axis, embryo	3	1.71825	0.24564
GO:0009948	anterior/posterior axis specification	1	0.325075	0.283181
GO:0007314	oocyte anterior/posterior axis specification	2	1.11454	0.307257
GO:0009950	dorsal/ventral axis specification	2	1.39318	0.40915
GO:0035282	segmentation	1	0.650149	0.486252
GO:0007350	blastoderm segmentation	1	1.02166	0.648973
GO:0008298	intracellular mRNA localization	1	1.0681	0.665298
GO:0009953	dorsal/ventral pattern formation	1	1.25386	0.723361
Cluster 47: myoblast fusion
observed gene count: 5
expected gene count: 1.393176548526
uncorrected p-value: 0.0115566178260435
GO ID	term	observed gene count	expected gene count	uncorrected p-value
GO:0007520	myoblast fusion	5	1.39318	0.0115566
Cluster 48: epithelial cell migration, open tracheal system
observed gene count: 5
expected gene count: 1.4396157668102
uncorrected p-value: 0.0132653709118923
GO ID	term	observed gene count	expected gene count	uncorrected p-value
GO:0007427	epithelial cell migration, open tracheal system	5	1.43962	0.0132654
Cluster 49: puparial adhesion
observed gene count: 3
expected gene count: 0.557270619410401
uncorrected p-value: 0.0160197873606979
GO ID	term	observed gene count	expected gene count	uncorrected p-value
GO:0007594	puparial adhesion	3	0.557271	0.0160198
Cluster 50: establishment of cell polarity
observed gene count: 5
expected gene count: 1.5789334216628
uncorrected p-value: 0.0193902446245643
GO ID	term	observed gene count	expected gene count	uncorrected p-value
GO:0045198	establishment of epithelial cell apical/basal polarity	3	0.417953	0.00678769
GO:0045197	establishment or maintenance of epithelial cell apical/basal polarity	2	0.789467	0.185471
GO:0030010	establishment of cell polarity	1	0.232196	0.211634
Cluster 51: septate junction assembly
observed gene count: 5
expected gene count: 1.625372639947
uncorrected p-value: 0.0217833314807106
GO ID	term	observed gene count	expected gene count	uncorrected p-value
GO:0019991	septate junction assembly	5	1.25386	0.00733954
Cluster 52: morphogenesis of follicular epithelium
observed gene count: 5
expected gene count: 1.7646902947996
uncorrected p-value: 0.0300824801399504
GO ID	term	observed gene count	expected gene count	uncorrected p-value
GO:0030708	germarium-derived female germ-line cyst encapsulation	3	0.464392	0.00936518
GO:0007293	germarium-derived egg chamber formation	3	0.928784	0.0631419
GO:0016333	morphogenesis of follicular epithelium	1	0.464392	0.378529
Cluster 53: wing disc pattern formation
observed gene count: 7
expected gene count: 3.018549188473
uncorrected p-value: 0.030554637652265
GO ID	term	observed gene count	expected gene count	uncorrected p-value
GO:0007450	dorsal/ventral pattern formation, imaginal disc	3	0.464392	0.00936518
GO:0035222	wing disc pattern formation	2	0.650149	0.135657
GO:0048190	wing disc dorsal/ventral pattern formation	4	2.18264	0.173095
Cluster 54: autophagy
observed gene count: 14
expected gene count: 8.26618085458761
uncorrected p-value: 0.0379640800619967
GO ID	term	observed gene count	expected gene count	uncorrected p-value
GO:0006914	autophagy	4	0.882345	0.0102309
GO:0040034	regulation of development, heterochronic	3	0.510831	0.012438
GO:0035071	salivary gland cell autophagic cell death	7	3.06499	0.0328655
GO:0007390	germ-band shortening	3	0.882345	0.0555198
GO:0007435	salivary gland morphogenesis	5	2.32196	0.0812287
GO:0008219	cell death	2	0.510831	0.0897317
GO:0048102	autophagic cell death	5	2.64704	0.1242
GO:0035070	salivary gland histolysis	1	0.371514	0.316485
GO:0007431	salivary gland development	2	1.16098	0.32461
Cluster 55: chitin-based cuticle development
observed gene count: 7
expected gene count: 3.2043060616098
uncorrected p-value: 0.0404875113617678
GO ID	term	observed gene count	expected gene count	uncorrected p-value
GO:0040003	chitin-based cuticle development	5	2.18264	0.0657044
GO:0007591	molting cycle, chitin-based cuticle	2	0.60371	0.119811
Cluster 56: chitin catabolic process
observed gene count: 3
expected gene count: 0.882345147399801
uncorrected p-value: 0.0555197922600641
GO ID	term	observed gene count	expected gene count	uncorrected p-value
GO:0006032	chitin catabolic process	3	0.743027	0.0355378
Cluster 57: cell-cell signaling
observed gene count: 7
expected gene count: 3.62225902616761
uncorrected p-value: 0.0698712323302379
GO ID	term	observed gene count	expected gene count	uncorrected p-value
GO:0007267	cell-cell signaling	3	0.325075	0.00303278
GO:0050807	regulation of synapse organization	1	0.464392	0.378529
GO:0050803	regulation of synapse structure and activity	1	0.650149	0.486252
GO:0007268	synaptic transmission	2	2.18264	0.648537
Cluster 58: gonad development
observed gene count: 7
expected gene count: 3.80801589930441
uncorrected p-value: 0.0861626729388291
GO ID	term	observed gene count	expected gene count	uncorrected p-value
GO:0008406	gonad development	6	1.53249	0.00371395
GO:0007506	gonadal mesoderm development	3	0.371514	0.00468573
GO:0007280	pole cell migration	3	1.0681	0.088664
GO:0008354	germ cell migration	3	1.57893	0.208409
Cluster 59: regulation of cell cycle
observed gene count: 10
expected gene count: 6.22285525008281
uncorrected p-value: 0.0941080618229999
GO ID	term	observed gene count	expected gene count	uncorrected p-value
GO:0007346	regulation of mitotic cell cycle	6	1.43962	0.0026711
GO:0042127	regulation of cell proliferation	4	1.43962	0.0537081
GO:0051726	regulation of cell cycle	2	3.76158	0.89559
Cluster 60: growth
observed gene count: 3
expected gene count: 1.1145412388208
uncorrected p-value: 0.0979930047772413
GO ID	term	observed gene count	expected gene count	uncorrected p-value
GO:0040007	growth	3	0.975224	0.0712188
Cluster 61: dorsal closure
observed gene count: 11
expected gene count: 7.38383570718781
uncorrected p-value: 0.12166968147592
GO ID	term	observed gene count	expected gene count	uncorrected p-value
GO:0007391	dorsal closure	7	4.13309	0.119399
GO:0016331	morphogenesis of embryonic epithelium	1	0.371514	0.316485
GO:0048598	embryonic morphogenesis	1	0.464392	0.378529
GO:0009792	embryonic development ending in birth or egg hatching	1	0.464392	0.378529
GO:0001700	embryonic development via the syncytial blastoderm	1	2.32196	0.907594
Cluster 62: regulation of apoptosis
observed gene count: 7
expected gene count: 4.50460417356741
uncorrected p-value: 0.164271267177454
GO ID	term	observed gene count	expected gene count	uncorrected p-value
GO:0043066	negative regulation of apoptosis	4	2.41484	0.221151
GO:0042981	regulation of apoptosis	2	0.928784	0.237333
GO:0010941	regulation of cell death	1	0.278635	0.248257
Cluster 63: carbohydrate biosynthetic process
observed gene count: 1
expected gene count: 0.232196091421
uncorrected p-value: 0.211633992025649
GO ID	term	observed gene count	expected gene count	uncorrected p-value
GO:0016051	carbohydrate biosynthetic process	1	0.232196	0.211634
Cluster 64: regulation of protein import into nucleus
observed gene count: 2
expected gene count: 0.975223583968201
uncorrected p-value: 0.254818258759873
GO ID	term	observed gene count	expected gene count	uncorrected p-value
GO:0042306	regulation of protein import into nucleus	2	0.278635	0.0285178
Cluster 65: sensory perception of chemical stimulus
observed gene count: 6
expected gene count: 4.31884730043061
uncorrected p-value: 0.263325517229825
GO ID	term	observed gene count	expected gene count	uncorrected p-value
GO:0007606	sensory perception of chemical stimulus	6	4.27241	0.255432
Cluster 66: response to heat
observed gene count: 4
expected gene count: 3.2043060616098
uncorrected p-value: 0.399575401043156
GO ID	term	observed gene count	expected gene count	uncorrected p-value
GO:0009408	response to heat	4	3.11143	0.378307
Cluster 67: visual perception
observed gene count: 1
expected gene count: 0.650149055978801
uncorrected p-value: 0.486252465827385
GO ID	term	observed gene count	expected gene count	uncorrected p-value
GO:0007601	visual perception	1	0.650149	0.486252
Cluster 68: oogenesis
observed gene count: 22
expected gene count: 21.6871149387214
uncorrected p-value: 0.503962385288916
GO ID	term	observed gene count	expected gene count	uncorrected p-value
GO:0030707	ovarian follicle cell development	7	2.50772	0.0119949
GO:0048477	oogenesis	14	9.2414	0.0803145
GO:0007281	germ cell development	3	1.39318	0.161119
GO:0032504	multicellular organism reproduction	2	10.1237	0.999657
Cluster 69: determination of adult life span
observed gene count: 7
expected gene count: 6.73368665120901
uncorrected p-value: 0.513117681130872
GO ID	term	observed gene count	expected gene count	uncorrected p-value
GO:0008340	determination of adult life span	7	6.68725	0.505748
Cluster 70: courtship behavior
observed gene count: 3
expected gene count: 2.8792315336204
uncorrected p-value: 0.554499175491176
GO ID	term	observed gene count	expected gene count	uncorrected p-value
GO:0007619	courtship behavior	2	1.20742	0.341848
GO:0008049	male courtship behavior	2	1.62537	0.488203
Cluster 71: immune response
observed gene count: 9
expected gene count: 9.65935740311361
uncorrected p-value: 0.633674932760768
GO ID	term	observed gene count	expected gene count	uncorrected p-value
GO:0050830	defense response to Gram-positive bacterium	3	1.95045	0.309502
GO:0009617	response to bacterium	1	1.0681	0.665298
GO:0006955	immune response	2	2.32196	0.681814
GO:0045087	innate immune response	1	1.81113	0.843848
GO:0006952	defense response	3	4.69036	0.85402
GO:0042742	defense response to bacterium	1	2.64704	0.933837
Cluster 72: dephosphorylation
observed gene count: 12
expected gene count: 13.2816164292812
uncorrected p-value: 0.682172105960526
GO ID	term	observed gene count	expected gene count	uncorrected p-value
GO:0016311	dephosphorylation	2	1.25386	0.358943
GO:0006468	protein amino acid phosphorylation	10	10.8203	0.646123
Cluster 73: immune response
observed gene count: 4
expected gene count: 4.64392182842001
uncorrected p-value: 0.688548175364188
GO ID	term	observed gene count	expected gene count	uncorrected p-value
GO:0019730	antimicrobial humoral response	3	1.90401	0.296631
GO:0006955	immune response	2	2.32196	0.681814
Cluster 74: gastrulation involving germ band extension
observed gene count: 1
expected gene count: 1.4396157668102
uncorrected p-value: 0.771362548312415
GO ID	term	observed gene count	expected gene count	uncorrected p-value
GO:0010004	gastrulation involving germ band extension	1	0.510831	0.407409
Cluster 75: transcription, DNA-dependent
observed gene count: 3
expected gene count: 4.08665120900961
uncorrected p-value: 0.782089805114165
GO ID	term	observed gene count	expected gene count	uncorrected p-value
GO:0006366	transcription from RNA polymerase II promoter	2	2.22908	0.659926
GO:0006351	transcription, DNA-dependent	1	2.08976	0.882703
Cluster 76: endocytosis
observed gene count: 10
expected gene count: 14.9998675057966
uncorrected p-value: 0.936694401640876
GO ID	term	observed gene count	expected gene count	uncorrected p-value
GO:0016044	membrane organization	1	0.60371	0.46121
GO:0006911	phagocytosis, engulfment	7	8.31262	0.731031
GO:0006897	endocytosis	1	1.95045	0.864661
GO:0016192	vesicle-mediated transport	1	3.99377	0.983449
Cluster 77: protein localization
observed gene count: 4
expected gene count: 9.38072209340841
uncorrected p-value: 0.985955733023699
GO ID	term	observed gene count	expected gene count	uncorrected p-value
GO:0008104	protein localization	4	2.08976	0.154997
GO:0045184	establishment of protein localization	1	0.278635	0.248257
Cluster 78: cell proliferation
observed gene count: 9
expected gene count: 17.414706856575
uncorrected p-value: 0.991892333559201
GO ID	term	observed gene count	expected gene count	uncorrected p-value
GO:0008283	cell proliferation	8	3.39006	0.0195769
GO:0000022	mitotic spindle elongation	5	3.6687	0.304975
GO:0000278	mitotic cell cycle	1	1.48605	0.782002
GO:0007052	mitotic spindle organization	5	8.73057	0.940655

## Sheet: CarcassMixedMaleFemale+1d
sample name: CarcassMixedMaleFemale+1d
number of associated genes in the sample: 539
Cluster 1: phosphorylation
observed gene count: 58
expected gene count: 16.2467704537926
uncorrected p-value: 1.9971815620973e-17
GO ID	term	observed gene count	expected gene count	uncorrected p-value
GO:0006120	mitochondrial electron transport, NADH to ubiquinone	27	1.10692	1.2215e-35
GO:0006119	oxidative phosphorylation	3	0.285658	0.0022167
GO:0022900	electron transport chain	2	0.142829	0.0072789
GO:0055114	oxidation reduction	22	13.533	0.0176585
GO:0045333	cellular respiration	1	0.0714144	0.0701417
GO:0042773	ATP synthesis coupled electron transport	1	0.0714144	0.0701417
GO:0022904	respiratory electron transport chain	1	0.107122	0.103349
GO:0016310	phosphorylation	2	0.928387	0.237359
Cluster 2: tricarboxylic acid cycle
observed gene count: 17
expected gene count: 1.35687313680026
uncorrected p-value: 2.79321918393394e-15
GO ID	term	observed gene count	expected gene count	uncorrected p-value
GO:0006099	tricarboxylic acid cycle	16	1.28546	2.11638e-14
GO:0006084	acetyl-CoA metabolic process	1	0.0357072	0.0357072
Cluster 3: myofibril assembly
observed gene count: 8
expected gene count: 0.535607817157999
uncorrected p-value: 1.29481377871312e-08
GO ID	term	observed gene count	expected gene count	uncorrected p-value
GO:0030239	myofibril assembly	5	0.24995	1.12776e-06
GO:0030241	muscle thick filament assembly	2	0.107122	0.0037276
GO:0014866	skeletal myofibril assembly	1	0.0357072	0.0357072
Cluster 4: gluconeogenesis
observed gene count: 9
expected gene count: 0.821265319642266
uncorrected p-value: 4.61323747790528e-08
GO ID	term	observed gene count	expected gene count	uncorrected p-value
GO:0005978	glycogen biosynthetic process	4	0.178536	7.81313e-06
GO:0006090	pyruvate metabolic process	4	0.357072	0.000284329
GO:0006094	gluconeogenesis	2	0.142829	0.0072789
Cluster 5: glycogen metabolic process
observed gene count: 6
expected gene count: 0.285657502484266
uncorrected p-value: 5.31250170381561e-08
GO ID	term	observed gene count	expected gene count	uncorrected p-value
GO:0005978	glycogen biosynthetic process	4	0.178536	7.81313e-06
GO:0005977	glycogen metabolic process	2	0.107122	0.0037276
Cluster 6: glycolysis
observed gene count: 11
expected gene count: 1.57111626366346
uncorrected p-value: 2.85779599560867e-07
GO ID	term	observed gene count	expected gene count	uncorrected p-value
GO:0006096	glycolysis	11	0.964094	8.43687e-10
Cluster 7: myofibril assembly
observed gene count: 14
expected gene count: 3.35647565419013
uncorrected p-value: 5.83077705049202e-06
GO ID	term	observed gene count	expected gene count	uncorrected p-value
GO:0030239	myofibril assembly	5	0.24995	1.12776e-06
GO:0007010	cytoskeleton organization	5	1.53541	0.0179309
GO:0014866	skeletal myofibril assembly	1	0.0357072	0.0357072
GO:0031032	actomyosin structure organization	1	0.0714144	0.0701417
GO:0030036	actin cytoskeleton organization	3	1.78536	0.264263
Cluster 8: sensory perception of smell
observed gene count: 17
expected gene count: 6.24875786684333
uncorrected p-value: 0.000178920523090439
GO ID	term	observed gene count	expected gene count	uncorrected p-value
GO:0007606	sensory perception of chemical stimulus	14	3.28506	4.50051e-06
GO:0050877	neurological system process	1	0.0357072	0.0357072
GO:0007608	sensory perception of smell	2	3.03511	0.812226
Cluster 9: fatty acid biosynthetic process
observed gene count: 6
expected gene count: 0.999801258694932
uncorrected p-value: 0.000388208607504888
GO ID	term	observed gene count	expected gene count	uncorrected p-value
GO:0006633	fatty acid biosynthetic process	6	0.714144	5.09375e-05
GO:0000038	very-long-chain fatty acid metabolic process	3	0.142829	0.000176306
Cluster 10: hormone metabolic process
observed gene count: 3
expected gene count: 0.357071878105333
uncorrected p-value: 0.00450282887505259
GO ID	term	observed gene count	expected gene count	uncorrected p-value
GO:0042810	pheromone metabolic process	2	0.214243	0.0173505
GO:0042445	hormone metabolic process	1	0.142829	0.135372
Cluster 11: ion transport
observed gene count: 24
expected gene count: 13.6044385558132
uncorrected p-value: 0.00524359483748189
GO ID	term	observed gene count	expected gene count	uncorrected p-value
GO:0015992	proton transport	15	1.10692	2.8634e-14
GO:0015986	ATP synthesis coupled proton transport	12	0.642729	5.81675e-14
GO:0046034	ATP metabolic process	1	0.107122	0.103349
GO:0015672	monovalent inorganic cation transport	1	0.178536	0.166254
GO:0006811	ion transport	2	1.71395	0.515422
GO:0055085	transmembrane transport	5	9.89089	0.971766
Cluster 12: determination of adult life span
observed gene count: 12
expected gene count: 5.17754223252733
uncorrected p-value: 0.00580638455568675
GO ID	term	observed gene count	expected gene count	uncorrected p-value
GO:0008340	determination of adult life span	12	5.14184	0.00549828
Cluster 13: muscle organ development
observed gene count: 7
expected gene count: 2.67803908579
uncorrected p-value: 0.0174347947829955
GO ID	term	observed gene count	expected gene count	uncorrected p-value
GO:0007519	skeletal muscle tissue development	4	0.499901	0.00120922
GO:0060537	muscle tissue development	2	0.142829	0.0072789
GO:0007517	muscle organ development	4	2.24955	0.187365
Cluster 14: cellular calcium ion homeostasis
observed gene count: 3
expected gene count: 0.642729380589599
uncorrected p-value: 0.0247753418737274
GO ID	term	observed gene count	expected gene count	uncorrected p-value
GO:0006874	cellular calcium ion homeostasis	3	0.285658	0.0022167
Cluster 15: flight behavior
observed gene count: 7
expected gene count: 3.17793971513746
uncorrected p-value: 0.0397740229228115
GO ID	term	observed gene count	expected gene count	uncorrected p-value
GO:0007629	flight behavior	5	0.785558	0.000905757
GO:0006839	mitochondrial transport	3	0.535608	0.0149508
Cluster 16: response to pheromone
observed gene count: 6
expected gene count: 2.5709175223584
uncorrected p-value: 0.0433768036019814
GO ID	term	observed gene count	expected gene count	uncorrected p-value
GO:0043695	detection of pheromone	5	0.464193	5.77923e-05
GO:0019236	response to pheromone	2	0.499901	0.0872537
Cluster 17: cell-cell signaling
observed gene count: 10
expected gene count: 5.60602848625373
uncorrected p-value: 0.0551024271399692
GO ID	term	observed gene count	expected gene count	uncorrected p-value
GO:0007268	synaptic transmission	5	1.67824	0.0254619
GO:0006836	neurotransmitter transport	2	0.856973	0.210763
GO:0007267	cell-cell signaling	1	0.24995	0.224753
GO:0007269	neurotransmitter secretion	3	3.28506	0.64307
Cluster 18: courtship behavior
observed gene count: 3
expected gene count: 1.2854587611792
uncorrected p-value: 0.136318621137
GO ID	term	observed gene count	expected gene count	uncorrected p-value
GO:0007619	courtship behavior	3	0.928387	0.0640909
Cluster 19: cell migration
observed gene count: 6
expected gene count: 4.74905597880093
uncorrected p-value: 0.339052111836222
GO ID	term	observed gene count	expected gene count	uncorrected p-value
GO:0007427	epithelial cell migration, open tracheal system	3	1.10692	0.0974454
GO:0016477	cell migration	2	0.821265	0.197578
GO:0007424	open tracheal system development	3	3.78496	0.734949
Cluster 20: endocytosis
observed gene count: 13
expected gene count: 11.5334216628023
uncorrected p-value: 0.369220583684593
GO ID	term	observed gene count	expected gene count	uncorrected p-value
GO:0006911	phagocytosis, engulfment	9	6.39159	0.191143
GO:0016044	membrane organization	1	0.464193	0.376792
GO:0006897	endocytosis	1	1.4997	0.783301
GO:0016192	vesicle-mediated transport	2	3.07082	0.81734
Cluster 21: protein folding
observed gene count: 6
expected gene count: 5.24895660814839
uncorrected p-value: 0.4285979899259
GO ID	term	observed gene count	expected gene count	uncorrected p-value
GO:0009408	response to heat	5	2.39238	0.090792
GO:0006457	protein folding	3	3.28506	0.64307
Cluster 22: protein localization
observed gene count: 2
expected gene count: 1.7139450149056
uncorrected p-value: 0.515421765373816
GO ID	term	observed gene count	expected gene count	uncorrected p-value
GO:0045185	maintenance of protein location	1	0.142829	0.135372
GO:0008104	protein localization	1	1.60682	0.805757
Cluster 23: immune response
observed gene count: 8
expected gene count: 8.28406757204372
uncorrected p-value: 0.590401223600709
GO ID	term	observed gene count	expected gene count	uncorrected p-value
GO:0009617	response to bacterium	3	0.821265	0.0471851
GO:0006959	humoral immune response	1	0.749851	0.534238
GO:0042742	defense response to bacterium	2	2.03531	0.608983
GO:0019730	antimicrobial humoral response	1	1.46399	0.775255
GO:0006955	immune response	1	1.78536	0.83814
GO:0006952	defense response	1	3.60643	0.974899
Cluster 24: regulation of transcription, DNA-dependent
observed gene count: 10
expected gene count: 12.6760516727393
uncorrected p-value: 0.819717640407088
GO ID	term	observed gene count	expected gene count	uncorrected p-value
GO:0006355	regulation of transcription, DNA-dependent	10	12.6403	0.817103
Cluster 25: oogenesis
observed gene count: 16
expected gene count: 19.7817820470354
uncorrected p-value: 0.84145383961395
GO ID	term	observed gene count	expected gene count	uncorrected p-value
GO:0032504	multicellular organism reproduction	11	7.78417	0.157939
GO:0009952	anterior/posterior pattern formation	1	0.642729	0.480486
GO:0007283	spermatogenesis	3	3.39218	0.664489
GO:0048477	oogenesis	2	7.10573	0.994188
Cluster 26: mitotic cell cycle
observed gene count: 1
expected gene count: 2.42808877111626
uncorrected p-value: 0.916097883374958
GO ID	term	observed gene count	expected gene count	uncorrected p-value
GO:0000278	mitotic cell cycle	1	1.14263	0.687999
Cluster 27: muscle attachment
observed gene count: 8
expected gene count: 13.3187810533289
uncorrected p-value: 0.958863064228944
GO ID	term	observed gene count	expected gene count	uncorrected p-value
GO:0016203	muscle attachment	5	1.10692	0.00448627
GO:0035220	wing disc development	2	2.53521	0.726162
GO:0007476	imaginal disc-derived wing morphogenesis	3	7.03432	0.973749
Cluster 28: axonogenesis
observed gene count: 10
expected gene count: 19.5675389201722
uncorrected p-value: 0.994895366571689
GO ID	term	observed gene count	expected gene count	uncorrected p-value
GO:0001709	cell fate determination	1	0.928387	0.611773
GO:0007424	open tracheal system development	3	3.78496	0.734949
GO:0007409	axonogenesis	1	1.78536	0.83814
GO:0048813	dendrite morphogenesis	3	4.71335	0.855084
GO:0048812	neuron projection morphogenesis	2	3.74925	0.893411
GO:0007411	axon guidance	2	5.53461	0.976441

## Sheet: CarcassMixedMaleFemale+4d
sample name: CarcassMixedMaleFemale+4d
number of associated genes in the sample: 499
Cluster 1: oxidation reduction
observed gene count: 37
expected gene count: 15.0410732030474
uncorrected p-value: 4.39474153133848e-07
GO ID	term	observed gene count	expected gene count	uncorrected p-value
GO:0006120	mitochondrial electron transport, NADH to ubiquinone	13	1.02478	5.77278e-12
GO:0006119	oxidative phosphorylation	3	0.264458	0.00177601
GO:0022900	electron transport chain	2	0.132229	0.00626023
GO:0055114	oxidation reduction	19	12.5287	0.0476031
Cluster 2: fatty acid biosynthetic process
observed gene count: 7
expected gene count: 0.925604504802915
uncorrected p-value: 2.67678361865102e-05
GO ID	term	observed gene count	expected gene count	uncorrected p-value
GO:0006633	fatty acid biosynthetic process	7	0.661146	2.20554e-06
GO:0000038	very-long-chain fatty acid metabolic process	3	0.132229	0.000140118
Cluster 3: tricarboxylic acid cycle
observed gene count: 7
expected gene count: 1.25617754223253
uncorrected p-value: 0.000214302509071217
GO ID	term	observed gene count	expected gene count	uncorrected p-value
GO:0006099	tricarboxylic acid cycle	6	1.19006	0.00106053
GO:0006084	acetyl-CoA metabolic process	1	0.0330573	0.0330573
Cluster 4: sensory perception of smell
observed gene count: 16
expected gene count: 5.78502815501822
uncorrected p-value: 0.000231716197835669
GO ID	term	observed gene count	expected gene count	uncorrected p-value
GO:0007606	sensory perception of chemical stimulus	15	3.04127	3.14221e-07
GO:0007608	sensory perception of smell	1	2.80987	0.943044
Cluster 5: hormone metabolic process
observed gene count: 3
expected gene count: 0.330573037429612
uncorrected p-value: 0.00362210886645321
GO ID	term	observed gene count	expected gene count	uncorrected p-value
GO:0042810	pheromone metabolic process	2	0.198344	0.0149756
GO:0042445	hormone metabolic process	1	0.132229	0.125828
Cluster 6: myofibril assembly
observed gene count: 12
expected gene count: 5.61974163630341
uncorrected p-value: 0.0109497955989034
GO ID	term	observed gene count	expected gene count	uncorrected p-value
GO:0045214	sarcomere organization	6	0.595031	1.67505e-05
GO:0030239	myofibril assembly	3	0.231401	0.00113787
GO:0031032	actomyosin structure organization	1	0.0661146	0.0650239
GO:0007010	cytoskeleton organization	2	1.42146	0.418172
GO:0030036	actin cytoskeleton organization	2	1.65287	0.49578
GO:0007517	muscle organ development	2	2.08261	0.621192
Cluster 7: oogenesis
observed gene count: 28
expected gene count: 18.743491222259
uncorrected p-value: 0.022690636774963
GO ID	term	observed gene count	expected gene count	uncorrected p-value
GO:0007306	eggshell chorion assembly	9	0.628089	3.01855e-09
GO:0032504	multicellular organism reproduction	11	7.20649	0.108611
GO:0007304	chorion-containing eggshell formation	2	1.05783	0.285842
GO:0007283	spermatogenesis	4	3.14044	0.384788
GO:0048477	oogenesis	3	6.5784	0.962532
Cluster 8: glycerol metabolic process
observed gene count: 2
expected gene count: 0.26445842994369
uncorrected p-value: 0.0267556130470404
GO ID	term	observed gene count	expected gene count	uncorrected p-value
GO:0006071	glycerol metabolic process	2	0.264458	0.0267556
Cluster 9: mating behavior
observed gene count: 4
expected gene count: 1.1900629347466
uncorrected p-value: 0.030144518847859
GO ID	term	observed gene count	expected gene count	uncorrected p-value
GO:0007619	courtship behavior	4	0.85949	0.00989906
GO:0007617	mating behavior	1	0.297516	0.261125
Cluster 10: response to pheromone
observed gene count: 6
expected gene count: 2.38012586949321
uncorrected p-value: 0.0315636127680815
GO ID	term	observed gene count	expected gene count	uncorrected p-value
GO:0043695	detection of pheromone	5	0.429745	3.99605e-05
GO:0019236	response to pheromone	2	0.462802	0.0763575
Cluster 11: glycogen metabolic process
observed gene count: 2
expected gene count: 0.495859556144419
uncorrected p-value: 0.086236269317789
GO ID	term	observed gene count	expected gene count	uncorrected p-value
GO:0005977	glycogen metabolic process	2	0.0991719	0.00320017
Cluster 12: muscle organ development
observed gene count: 5
expected gene count: 2.47929778072209
uncorrected p-value: 0.102167693761447
GO ID	term	observed gene count	expected gene count	uncorrected p-value
GO:0007519	skeletal muscle tissue development	4	0.462802	0.000906838
GO:0060537	muscle tissue development	2	0.132229	0.00626023
GO:0007517	muscle organ development	2	2.08261	0.621192
Cluster 13: glycolysis
observed gene count: 3
expected gene count: 1.45452136469029
uncorrected p-value: 0.177301896432217
GO ID	term	observed gene count	expected gene count	uncorrected p-value
GO:0006096	glycolysis	3	0.892547	0.0584014
Cluster 14: synaptic transmission
observed gene count: 3
expected gene count: 1.91732361709175
uncorrected p-value: 0.300491743747769
GO ID	term	observed gene count	expected gene count	uncorrected p-value
GO:0007268	synaptic transmission	3	1.55369	0.202593
Cluster 15: neuropeptide signaling pathway
observed gene count: 6
expected gene count: 5.09082477641603
uncorrected p-value: 0.400276992422903
GO ID	term	observed gene count	expected gene count	uncorrected p-value
GO:0007218	neuropeptide signaling pathway	4	1.28923	0.0389868
GO:0007186	G-protein coupled receptor protein signaling pathway	3	3.8677	0.747889
Cluster 16: proton transport
observed gene count: 11
expected gene count: 10.8758529314342
uncorrected p-value: 0.528130431329677
GO ID	term	observed gene count	expected gene count	uncorrected p-value
GO:0015992	proton transport	4	1.02478	0.0183084
GO:0015986	ATP synthesis coupled proton transport	2	0.595031	0.117878
GO:0015672	monovalent inorganic cation transport	1	0.165287	0.154733
GO:0055085	transmembrane transport	6	9.15687	0.899559
Cluster 17: protein folding
observed gene count: 5
expected gene count: 4.8594236502153
uncorrected p-value: 0.537851217165867
GO ID	term	observed gene count	expected gene count	uncorrected p-value
GO:0009408	response to heat	3	2.21484	0.382324
GO:0006457	protein folding	3	3.04127	0.590555
Cluster 18: ion transport
observed gene count: 3
expected gene count: 2.87598542563763
uncorrected p-value: 0.552472691273829
GO ID	term	observed gene count	expected gene count	uncorrected p-value
GO:0015672	monovalent inorganic cation transport	1	0.165287	0.154733
GO:0006811	ion transport	2	1.58675	0.47427
Cluster 19: chitin metabolic process
observed gene count: 3
expected gene count: 3.00821464060947
uncorrected p-value: 0.58310758594029
GO ID	term	observed gene count	expected gene count	uncorrected p-value
GO:0006030	chitin metabolic process	3	3.00821	0.583108
Cluster 20: defense response
observed gene count: 7
expected gene count: 7.20649221596555
uncorrected p-value: 0.584768073086235
GO ID	term	observed gene count	expected gene count	uncorrected p-value
GO:0006959	humoral immune response	2	0.694203	0.151865
GO:0019730	antimicrobial humoral response	2	1.35535	0.39489
GO:0042742	defense response to bacterium	2	1.88427	0.566489
GO:0006952	defense response	3	3.33879	0.653634
Cluster 21: cell morphogenesis
observed gene count: 5
expected gene count: 8.03292480953958
uncorrected p-value: 0.907815136096038
GO ID	term	observed gene count	expected gene count	uncorrected p-value
GO:0000902	cell morphogenesis	2	1.55369	0.463309
GO:0048812	neuron projection morphogenesis	3	3.47102	0.67934
Cluster 22: endocytosis
observed gene count: 6
expected gene count: 10.6775091089765
uncorrected p-value: 0.958646704886809
GO ID	term	observed gene count	expected gene count	uncorrected p-value
GO:0016044	membrane organization	1	0.429745	0.354148
GO:0006897	endocytosis	1	1.38841	0.756789
GO:0006911	phagocytosis, engulfment	3	5.91726	0.93836
GO:0016192	vesicle-mediated transport	1	2.84293	0.944938
Cluster 23: compound eye development
observed gene count: 2
expected gene count: 5.81808545876118
uncorrected p-value: 0.981553729505572
GO ID	term	observed gene count	expected gene count	uncorrected p-value
GO:0048749	compound eye development	2	3.80159	0.897599
Cluster 24: regulation of transcription, DNA-dependent
observed gene count: 5
expected gene count: 11.7353428287512
uncorrected p-value: 0.992189126168844
GO ID	term	observed gene count	expected gene count	uncorrected p-value
GO:0006355	regulation of transcription, DNA-dependent	5	11.7023	0.992

## Sheet: CarcassMixedMaleFemale+20d
sample name: CarcassMixedMaleFemale+20d
number of associated genes in the sample: 514
Cluster 1: immune response
observed gene count: 33
expected gene count: 8.8532626697582
uncorrected p-value: 6.89261988814335e-11
GO ID	term	observed gene count	expected gene count	uncorrected p-value
GO:0019731	antibacterial humoral response	15	0.885326	4.29412e-16
GO:0006952	defense response	21	3.43915	2.04468e-11
GO:0006959	humoral immune response	10	0.715071	4.83687e-10
GO:0050829	defense response to Gram-negative bacterium	11	1.7366	8.88396e-07
GO:0042742	defense response to bacterium	9	1.94091	0.000120293
GO:0045087	innate immune response	5	1.32799	0.00994284
GO:0006955	immune response	5	1.70255	0.0270294
GO:0009617	response to bacterium	3	0.783173	0.0419266
GO:0019730	antimicrobial humoral response	3	1.39609	0.16277
Cluster 2: response to fungus
observed gene count: 20
expected gene count: 3.74561112951308
uncorrected p-value: 7.76194728600676e-10
GO ID	term	observed gene count	expected gene count	uncorrected p-value
GO:0050830	defense response to Gram-positive bacterium	13	1.43014	7.35101e-10
GO:0050829	defense response to Gram-negative bacterium	11	1.7366	8.88396e-07
GO:0019732	antifungal humoral response	3	0.306459	0.002828
GO:0050832	defense response to fungus	6	1.5323	0.0039924
GO:0009620	response to fungus	1	0.374561	0.316969
Cluster 3: regulation of humoral immune response
observed gene count: 14
expected gene count: 2.28141768797615
uncorrected p-value: 4.40250182204082e-08
GO ID	term	observed gene count	expected gene count	uncorrected p-value
GO:0050830	defense response to Gram-positive bacterium	13	1.43014	7.35101e-10
GO:0006964	positive regulation of biosynthetic process of antibacterial peptides active against Gram-negative bacteria	2	0.170255	0.0108075
GO:0002920	regulation of humoral immune response	1	0.034051	0.034051
GO:0006963	positive regulation of antibacterial peptide biosynthetic process	1	0.510765	0.405425
Cluster 4: fatty acid biosynthetic process
observed gene count: 7
expected gene count: 0.953428287512421
uncorrected p-value: 3.23666584560798e-05
GO ID	term	observed gene count	expected gene count	uncorrected p-value
GO:0006633	fatty acid biosynthetic process	7	0.68102	2.68573e-06
GO:0000038	very-long-chain fatty acid metabolic process	3	0.136204	0.000153048
Cluster 5: sensory perception of smell
observed gene count: 16
expected gene count: 5.95892679695263
uncorrected p-value: 0.000322423168478489
GO ID	term	observed gene count	expected gene count	uncorrected p-value
GO:0007606	sensory perception of chemical stimulus	15	3.13269	4.58147e-07
GO:0007608	sensory perception of smell	2	2.89434	0.790579
Cluster 6: response to pheromone
observed gene count: 9
expected gene count: 2.45167273931765
uncorrected p-value: 0.000724809241873733
GO ID	term	observed gene count	expected gene count	uncorrected p-value
GO:0043695	detection of pheromone	6	0.442663	2.11907e-06
GO:0019236	response to pheromone	4	0.476714	0.00101303
Cluster 7: hormone metabolic process
observed gene count: 3
expected gene count: 0.340510102683008
uncorrected p-value: 0.00393845430297896
GO ID	term	observed gene count	expected gene count	uncorrected p-value
GO:0042810	pheromone metabolic process	2	0.204306	0.0158478
GO:0042445	hormone metabolic process	1	0.136204	0.129416
Cluster 8: electron transport chain
observed gene count: 8
expected gene count: 2.58787678039086
uncorrected p-value: 0.00423680445270009
GO ID	term	observed gene count	expected gene count	uncorrected p-value
GO:0006120	mitochondrial electron transport, NADH to ubiquinone	5	1.05558	0.0036648
GO:0006796	phosphate metabolic process	1	0.034051	0.034051
GO:0022900	electron transport chain	1	0.136204	0.129416
GO:0006119	oxidative phosphorylation	1	0.272408	0.242112
Cluster 9: tricarboxylic acid cycle
observed gene count: 5
expected gene count: 1.29393839019543
uncorrected p-value: 0.00891155616977128
GO ID	term	observed gene count	expected gene count	uncorrected p-value
GO:0006099	tricarboxylic acid cycle	4	1.22584	0.0331054
GO:0006084	acetyl-CoA metabolic process	1	0.034051	0.034051
Cluster 10: peptidoglycan catabolic process
observed gene count: 3
expected gene count: 0.544816164292812
uncorrected p-value: 0.0157914552187188
GO ID	term	observed gene count	expected gene count	uncorrected p-value
GO:0009253	peptidoglycan catabolic process	3	0.476714	0.0107951
Cluster 11: glycolysis
observed gene count: 4
expected gene count: 1.49824445180523
uncorrected p-value: 0.0618701903724042
GO ID	term	observed gene count	expected gene count	uncorrected p-value
GO:0046164	alcohol catabolic process	1	0.034051	0.034051
GO:0019318	hexose metabolic process	1	0.170255	0.159068
GO:0006096	glycolysis	2	0.919377	0.23402
Cluster 12: aging
observed gene count: 8
expected gene count: 4.93739648890361
uncorrected p-value: 0.122229103026517
GO ID	term	observed gene count	expected gene count	uncorrected p-value
GO:0007568	aging	2	0.170255	0.0108075
GO:0008340	determination of adult life span	8	4.90335	0.118787
Cluster 13: courtship behavior
observed gene count: 3
expected gene count: 1.22583636965883
uncorrected p-value: 0.122939091431707
GO ID	term	observed gene count	expected gene count	uncorrected p-value
GO:0007619	courtship behavior	3	0.885326	0.0571486
Cluster 14: response to oxidative stress
observed gene count: 5
expected gene count: 2.69002981119576
uncorrected p-value: 0.13169267439965
GO ID	term	observed gene count	expected gene count	uncorrected p-value
GO:0006979	response to oxidative stress	4	2.14521	0.166726
GO:0000302	response to reactive oxygen species	1	0.238357	0.215382
Cluster 15: cell morphogenesis
observed gene count: 3
expected gene count: 1.73660152368334
uncorrected p-value: 0.251079635340867
GO ID	term	observed gene count	expected gene count	uncorrected p-value
GO:0000902	cell morphogenesis	3	1.6004	0.21473
Cluster 16: muscle organ development
observed gene count: 3
expected gene count: 2.55382577012256
uncorrected p-value: 0.472683175302423
GO ID	term	observed gene count	expected gene count	uncorrected p-value
GO:0007519	skeletal muscle tissue development	2	0.476714	0.0803869
GO:0060537	muscle tissue development	1	0.136204	0.129416
GO:0007517	muscle organ development	1	2.14521	0.887765
Cluster 17: oogenesis
observed gene count: 17
expected gene count: 16.8893010930772
uncorrected p-value: 0.524476383338081
GO ID	term	observed gene count	expected gene count	uncorrected p-value
GO:0032504	multicellular organism reproduction	14	7.42312	0.0173585
GO:0007283	spermatogenesis	2	3.23485	0.839068
GO:0048477	oogenesis	2	6.77615	0.992151
Cluster 18: ion transport
observed gene count: 4
expected gene count: 4.6649884067572
uncorrected p-value: 0.690569644615984
GO ID	term	observed gene count	expected gene count	uncorrected p-value
GO:0030001	metal ion transport	1	0.34051	0.292875
GO:0006811	ion transport	2	1.63445	0.489939
GO:0006814	sodium ion transport	1	1.77065	0.835461
Cluster 19: metamorphosis
observed gene count: 2
expected gene count: 3.06459092414707
uncorrected p-value: 0.816248339233995
GO ID	term	observed gene count	expected gene count	uncorrected p-value
GO:0007444	imaginal disc development	1	1.12368	0.681615
GO:0007552	metamorphosis	1	1.22584	0.713113
Cluster 20: regulation of transcription, DNA-dependent
observed gene count: 9
expected gene count: 12.0540576349785
uncorrected p-value: 0.856034021036825
GO ID	term	observed gene count	expected gene count	uncorrected p-value
GO:0006355	regulation of transcription, DNA-dependent	9	12.0541	0.856034
Cluster 21: cell fate specification
observed gene count: 2
expected gene count: 4.18827426300099
uncorrected p-value: 0.925545580517491
GO ID	term	observed gene count	expected gene count	uncorrected p-value
GO:0009952	anterior/posterior pattern formation	1	0.612918	0.464178
GO:0007389	pattern specification process	1	0.715071	0.517136
GO:0001708	cell fate specification	1	0.783173	0.549505
Cluster 22: phagocytosis
observed gene count: 6
expected gene count: 10.9984763166611
uncorrected p-value: 0.966110931754658
GO ID	term	observed gene count	expected gene count	uncorrected p-value
GO:0016044	membrane organization	1	0.442663	0.362727
GO:0006909	phagocytosis	1	0.612918	0.464178
GO:0006911	phagocytosis, engulfment	3	6.09513	0.94605
GO:0016192	vesicle-mediated transport	1	2.92839	0.949611

## Sheet: FatL3
sample name: FatL3
number of associated genes in the sample: 388
Cluster 1: IMP biosynthetic process
observed gene count: 11
expected gene count: 0.771116263663465
uncorrected p-value: 9.90349222845798e-11
GO ID	term	observed gene count	expected gene count	uncorrected p-value
GO:0006189	'de novo' IMP biosynthetic process	4	0.179927	1.4149e-05
GO:0009113	purine base biosynthetic process	2	0.0771116	0.00194338
GO:0006164	purine nucleotide biosynthetic process	2	0.102816	0.00382063
GO:0009156	ribonucleoside monophosphate biosynthetic process	1	0.0257039	0.0257039
GO:0006188	IMP biosynthetic process	1	0.0257039	0.0257039
GO:0009152	purine ribonucleotide biosynthetic process	1	0.0257039	0.0257039
GO:0006163	purine nucleotide metabolic process	1	0.0514078	0.0507487
GO:0006144	purine base metabolic process	1	0.0771116	0.0751514
GO:0009165	nucleotide biosynthetic process	1	0.0771116	0.0751514
GO:0009168	purine ribonucleoside monophosphate biosynthetic process	1	0.179927	0.166663
Cluster 2: glycine metabolic process
observed gene count: 5
expected gene count: 0.231334879099039
uncorrected p-value: 1.2656375694475e-06
GO ID	term	observed gene count	expected gene count	uncorrected p-value
GO:0006546	glycine catabolic process	4	0.205631	2.77233e-05
GO:0006544	glycine metabolic process	1	0.0257039	0.0257039
Cluster 3: lipid catabolic process
observed gene count: 10
expected gene count: 1.46512090096058
uncorrected p-value: 1.64827174920414e-06
GO ID	term	observed gene count	expected gene count	uncorrected p-value
GO:0006635	fatty acid beta-oxidation	5	0.308447	7.46261e-06
GO:0009062	fatty acid catabolic process	1	0.0514078	0.0507487
GO:0016042	lipid catabolic process	3	0.848228	0.0520835
GO:0006631	fatty acid metabolic process	1	0.154223	0.144669
Cluster 4: immune response
observed gene count: 13
expected gene count: 5.03795958926797
uncorrected p-value: 0.00170053828942252
GO ID	term	observed gene count	expected gene count	uncorrected p-value
GO:0042742	defense response to bacterium	4	1.46512	0.0585618
GO:0009617	response to bacterium	2	0.591189	0.117116
GO:0006952	defense response	5	2.59609	0.11875
GO:0045087	innate immune response	2	1.00245	0.265123
GO:0006955	immune response	2	1.28519	0.369389
Cluster 5: folic acid and derivative biosynthetic process
observed gene count: 2
expected gene count: 0.128519377277244
uncorrected p-value: 0.00625961548599873
GO ID	term	observed gene count	expected gene count	uncorrected p-value
GO:0009396	folic acid and derivative biosynthetic process	2	0.102816	0.00382063
Cluster 6: gluconeogenesis
observed gene count: 4
expected gene count: 0.771116263663465
uncorrected p-value: 0.00694232743163522
GO ID	term	observed gene count	expected gene count	uncorrected p-value
GO:0006094	gluconeogenesis	3	0.102816	6.61283e-05
GO:0006090	pyruvate metabolic process	2	0.257039	0.0258714
Cluster 7: aging
observed gene count: 7
expected gene count: 3.72706194104008
uncorrected p-value: 0.0805768054565734
GO ID	term	observed gene count	expected gene count	uncorrected p-value
GO:0008340	determination of adult life span	7	3.70136	0.0783172
GO:0007568	aging	1	0.128519	0.122095
Cluster 8: heart development
observed gene count: 4
expected gene count: 2.13342166280225
uncorrected p-value: 0.165056061446778
GO ID	term	observed gene count	expected gene count	uncorrected p-value
GO:0010002	cardioblast differentiation	2	0.231335	0.0210506
GO:0007507	heart development	3	1.49082	0.186905
Cluster 9: cell motion
observed gene count: 7
expected gene count: 5.39781384564425
uncorrected p-value: 0.296055716675301
GO ID	term	observed gene count	expected gene count	uncorrected p-value
GO:0006928	cell motion	1	0.102816	0.0989283
GO:0007444	imaginal disc development	2	0.848228	0.20782
GO:0035290	trunk segmentation	1	0.257039	0.229317
GO:0009952	anterior/posterior pattern formation	1	0.46267	0.374365
GO:0009880	embryonic pattern specification	1	0.565485	0.436329
GO:0007517	muscle organ development	2	1.61934	0.484285
Cluster 10: olfactory behavior
observed gene count: 2
expected gene count: 1.25948989731699
uncorrected p-value: 0.360095908656742
GO ID	term	observed gene count	expected gene count	uncorrected p-value
GO:0042048	olfactory behavior	2	1.10527	0.303427
Cluster 11: cell death
observed gene count: 6
expected gene count: 4.93514408744617
uncorrected p-value: 0.372396098485186
GO ID	term	observed gene count	expected gene count	uncorrected p-value
GO:0007552	metamorphosis	2	0.92534	0.236376
GO:0035071	salivary gland cell autophagic cell death	3	1.69646	0.240582
GO:0008219	cell death	1	0.282743	0.24914
GO:0048102	autophagic cell death	2	1.46512	0.432766
GO:0007435	salivary gland morphogenesis	1	1.28519	0.728596
Cluster 12: cation transport
observed gene count: 2
expected gene count: 2.18482941371315
uncorrected p-value: 0.646319840728134
GO ID	term	observed gene count	expected gene count	uncorrected p-value
GO:0030001	metal ion transport	1	0.257039	0.229317
GO:0006812	cation transport	1	0.719709	0.517986
Cluster 13: sensory perception of chemical stimulus
observed gene count: 2
expected gene count: 2.39046041735674
uncorrected p-value: 0.694366734510011
GO ID	term	observed gene count	expected gene count	uncorrected p-value
GO:0007606	sensory perception of chemical stimulus	2	2.36476	0.688669
Cluster 14: cell motion
observed gene count: 5
expected gene count: 6.37456111295131
uncorrected p-value: 0.767875888147348
GO ID	term	observed gene count	expected gene count	uncorrected p-value
GO:0006928	cell motion	1	0.102816	0.0989283
GO:0032504	multicellular organism reproduction	4	5.60344	0.81543
Cluster 15: organic anion transport
observed gene count: 1
expected gene count: 1.59364027823783
uncorrected p-value: 0.801664175373844
GO ID	term	observed gene count	expected gene count	uncorrected p-value
GO:0015711	organic anion transport	1	0.205631	0.188093
Cluster 16: phagocytosis
observed gene count: 6
expected gene count: 8.30235177210997
uncorrected p-value: 0.841291281958824
GO ID	term	observed gene count	expected gene count	uncorrected p-value
GO:0006909	phagocytosis	1	0.46267	0.374365
GO:0006911	phagocytosis, engulfment	5	4.60099	0.489071
Cluster 17: muscle organ development
observed gene count: 8
expected gene count: 10.8984431931103
uncorrected p-value: 0.8571907028703
GO ID	term	observed gene count	expected gene count	uncorrected p-value
GO:0009952	anterior/posterior pattern formation	1	0.46267	0.374365
GO:0007517	muscle organ development	2	1.61934	0.484285
GO:0006355	regulation of transcription, DNA-dependent	6	9.09917	0.896053
Cluster 18: protein amino acid phosphorylation
observed gene count: 4
expected gene count: 6.65730374296125
uncorrected p-value: 0.903471254534492
GO ID	term	observed gene count	expected gene count	uncorrected p-value
GO:0006468	protein amino acid phosphorylation	4	5.989	0.853348
Cluster 19: chitin metabolic process
observed gene count: 1
expected gene count: 2.41616429281219
uncorrected p-value: 0.914173779137922
GO ID	term	observed gene count	expected gene count	uncorrected p-value
GO:0006030	chitin metabolic process	1	2.33905	0.907155
Cluster 20: cell motion
observed gene count: 6
expected gene count: 12.02941371315
uncorrected p-value: 0.982452478953634
GO ID	term	observed gene count	expected gene count	uncorrected p-value
GO:0006928	cell motion	1	0.102816	0.0989283
GO:0007517	muscle organ development	2	1.61934	0.484285
GO:0048666	neuron development	1	1.05386	0.656674
GO:0007409	axonogenesis	1	1.28519	0.728596
GO:0007411	axon guidance	3	3.9841	0.764866
GO:0048812	neuron projection morphogenesis	1	2.69891	0.935674

## Sheet: FatPrepupae
sample name: FatPrepupae
number of associated genes in the sample: 537
Cluster 1: nucleotide biosynthetic process
observed gene count: 9
expected gene count: 0.924942033786022
uncorrected p-value: 1.55258269092201e-07
GO ID	term	observed gene count	expected gene count	uncorrected p-value
GO:0006189	'de novo' IMP biosynthetic process	4	0.249023	5.08912e-05
GO:0006164	purine nucleotide biosynthetic process	3	0.142299	0.000174365
GO:0009113	purine base biosynthetic process	2	0.106724	0.0037003
GO:0009156	ribonucleoside monophosphate biosynthetic process	1	0.0355747	0.0355747
GO:0009152	purine ribonucleotide biosynthetic process	1	0.0355747	0.0355747
GO:0006163	purine nucleotide metabolic process	1	0.0711494	0.0698861
GO:0009165	nucleotide biosynthetic process	1	0.106724	0.102979
Cluster 2: immune response
observed gene count: 22
expected gene count: 7.39953627028818
uncorrected p-value: 5.11222148842078e-06
GO ID	term	observed gene count	expected gene count	uncorrected p-value
GO:0006952	defense response	14	3.59304	1.3093e-05
GO:0045087	innate immune response	5	1.38741	0.0118635
GO:0009617	response to bacterium	3	0.818218	0.0467527
GO:0050830	defense response to Gram-positive bacterium	4	1.49414	0.0612245
GO:0006955	immune response	3	1.77873	0.262462
GO:0042742	defense response to bacterium	3	2.02776	0.33094
Cluster 3: L-serine biosynthetic process
observed gene count: 3
expected gene count: 0.142298774428619
uncorrected p-value: 0.000174364936758461
GO ID	term	observed gene count	expected gene count	uncorrected p-value
GO:0006564	L-serine biosynthetic process	3	0.142299	0.000174365
Cluster 4: cell death
observed gene count: 17
expected gene count: 6.8303411725737
uncorrected p-value: 0.000511268213904007
GO ID	term	observed gene count	expected gene count	uncorrected p-value
GO:0035071	salivary gland cell autophagic cell death	11	2.34793	1.89865e-05
GO:0048102	autophagic cell death	9	2.02776	0.000167347
GO:0008219	cell death	2	0.391322	0.0561731
GO:0007552	metamorphosis	3	1.28069	0.13523
GO:0035070	salivary gland histolysis	1	0.284598	0.251625
GO:0007435	salivary gland morphogenesis	3	1.77873	0.262462
GO:0007431	salivary gland development	1	0.889367	0.595986
Cluster 5: metamorphosis
observed gene count: 28
expected gene count: 14.2298774428619
uncorrected p-value: 0.000524609691568433
GO ID	term	observed gene count	expected gene count	uncorrected p-value
GO:0007476	imaginal disc-derived wing morphogenesis	14	7.00821	0.0109203
GO:0008586	imaginal disc-derived wing vein morphogenesis	5	1.42299	0.0131722
GO:0007444	imaginal disc development	4	1.17396	0.0286497
GO:0048546	digestive tract morphogenesis	1	0.0711494	0.0698861
GO:0048565	gut development	1	0.106724	0.102979
GO:0007443	Malpighian tubule morphogenesis	3	1.13839	0.103942
GO:0007552	metamorphosis	3	1.28069	0.13523
GO:0007442	hindgut morphogenesis	2	0.675919	0.145308
GO:0048619	embryonic hindgut morphogenesis	1	0.177873	0.165681
GO:0007472	wing disc morphogenesis	1	0.60477	0.459965
GO:0035220	wing disc development	3	2.5258	0.465515
Cluster 6: nucleoside metabolic process
observed gene count: 4
expected gene count: 0.426896323285856
uncorrected p-value: 0.000624182522208463
GO ID	term	observed gene count	expected gene count	uncorrected p-value
GO:0009116	nucleoside metabolic process	4	0.426896	0.000624183
Cluster 7: compound eye pigmentation
observed gene count: 6
expected gene count: 1.45856243789334
uncorrected p-value: 0.00307266987031883
GO ID	term	observed gene count	expected gene count	uncorrected p-value
GO:0009113	purine base biosynthetic process	2	0.106724	0.0037003
GO:0048072	compound eye pigmentation	3	0.426896	0.00774711
GO:0042441	eye pigment metabolic process	1	0.0355747	0.0355747
GO:0048066	pigmentation during development	1	0.462471	0.375678
GO:0006726	eye pigment biosynthetic process	1	0.462471	0.375678
Cluster 8: response to ecdysone
observed gene count: 3
expected gene count: 0.426896323285856
uncorrected p-value: 0.00774711382209549
GO ID	term	observed gene count	expected gene count	uncorrected p-value
GO:0035075	response to ecdysone	3	0.426896	0.00774711
Cluster 9: folic acid and derivative biosynthetic process
observed gene count: 2
expected gene count: 0.177873468035773
uncorrected p-value: 0.0117608094124396
GO ID	term	observed gene count	expected gene count	uncorrected p-value
GO:0009396	folic acid and derivative biosynthetic process	2	0.142299	0.00722623
Cluster 10: gastrulation
observed gene count: 10
expected gene count: 4.66028486253726
uncorrected p-value: 0.0185585886765659
GO ID	term	observed gene count	expected gene count	uncorrected p-value
GO:0007507	heart development	6	2.06333	0.0166889
GO:0007369	gastrulation	3	0.889367	0.0576586
GO:0007498	mesoderm development	1	2.3835	0.91217
Cluster 11: segmentation
observed gene count: 21
expected gene count: 13.4472341835045
uncorrected p-value: 0.0295729664431457
GO ID	term	observed gene count	expected gene count	uncorrected p-value
GO:0035160	maintenance of epithelial integrity, open tracheal system	3	0.426896	0.00774711
GO:0007350	blastoderm segmentation	3	0.782643	0.0417224
GO:0007369	gastrulation	3	0.889367	0.0576586
GO:0002009	morphogenesis of an epithelium	3	0.889367	0.0576586
GO:0007391	dorsal closure	6	3.16615	0.0972393
GO:0009952	anterior/posterior pattern formation	2	0.640344	0.133
GO:0007424	open tracheal system development	6	3.77092	0.176211
GO:0008258	head involution	3	1.45856	0.178146
GO:0009880	embryonic pattern specification	2	0.782643	0.183444
GO:0007166	cell surface receptor linked signal transduction	1	0.249023	0.224007
GO:0048598	embryonic morphogenesis	1	0.355747	0.303954
GO:0035282	segmentation	1	0.498046	0.397907
GO:0007169	transmembrane receptor protein tyrosine kinase signaling pathway	1	0.53362	0.419346
GO:0007389	pattern specification process	1	0.747069	0.532892
GO:0001700	embryonic development via the syncytial blastoderm	2	1.77873	0.535421
Cluster 12: aging
observed gene count: 10
expected gene count: 5.15833057303743
uncorrected p-value: 0.0343961868770451
GO ID	term	observed gene count	expected gene count	uncorrected p-value
GO:0010259	multicellular organismal aging	1	0.0355747	0.0355747
GO:0008340	determination of adult life span	9	5.12276	0.0717963
GO:0007568	aging	1	0.177873	0.165681
Cluster 13: negative regulation of Wnt receptor signaling pathway
observed gene count: 4
expected gene count: 1.38741305067903
uncorrected p-value: 0.0488307244063317
GO ID	term	observed gene count	expected gene count	uncorrected p-value
GO:0030178	negative regulation of Wnt receptor signaling pathway	4	0.889367	0.0110602
Cluster 14: negative regulation of gene expression
observed gene count: 5
expected gene count: 2.06333222921497
uncorrected p-value: 0.0548268917394585
GO ID	term	observed gene count	expected gene count	uncorrected p-value
GO:0010629	negative regulation of gene expression	5	2.06333	0.0548269
Cluster 15: olfactory behavior
observed gene count: 4
expected gene count: 1.74315998675058
uncorrected p-value: 0.0958750407535808
GO ID	term	observed gene count	expected gene count	uncorrected p-value
GO:0042048	olfactory behavior	4	1.52971	0.0656913
Cluster 16: segmentation
observed gene count: 16
expected gene count: 11.5262007287181
uncorrected p-value: 0.116950296509803
GO ID	term	observed gene count	expected gene count	uncorrected p-value
GO:0007494	midgut development	4	1.06724	0.0208482
GO:0007350	blastoderm segmentation	3	0.782643	0.0417224
GO:0048565	gut development	1	0.106724	0.102979
GO:0009952	anterior/posterior pattern formation	2	0.640344	0.133
GO:0000578	embryonic axis specification	1	0.177873	0.165681
GO:0007424	open tracheal system development	6	3.77092	0.176211
GO:0009880	embryonic pattern specification	2	0.782643	0.183444
GO:0007314	oocyte anterior/posterior axis specification	2	0.853793	0.209589
GO:0009948	anterior/posterior axis specification	1	0.249023	0.224007
GO:0009994	oocyte differentiation	1	0.284598	0.251625
GO:0048598	embryonic morphogenesis	1	0.355747	0.303954
GO:0035282	segmentation	1	0.498046	0.397907
GO:0007169	transmembrane receptor protein tyrosine kinase signaling pathway	1	0.53362	0.419346
GO:0007309	oocyte axis specification	1	0.53362	0.419346
GO:0007389	pattern specification process	1	0.747069	0.532892
GO:0007281	germ cell development	1	1.06724	0.663027
Cluster 17: stem cell division
observed gene count: 3
expected gene count: 1.35183835707188
uncorrected p-value: 0.151947043624777
GO ID	term	observed gene count	expected gene count	uncorrected p-value
GO:0048103	somatic stem cell division	2	0.320172	0.0385268
GO:0017145	stem cell division	1	0.177873	0.165681
GO:0008356	asymmetric cell division	2	0.853793	0.209589
Cluster 18: eye development
observed gene count: 14
expected gene count: 10.7435574693607
uncorrected p-value: 0.189846555414072
GO ID	term	observed gene count	expected gene count	uncorrected p-value
GO:0001752	compound eye photoreceptor fate commitment	3	0.320172	0.00320325
GO:0048749	compound eye development	7	4.09109	0.115784
GO:0046530	photoreceptor cell differentiation	1	0.142299	0.134897
GO:0045165	cell fate commitment	2	0.782643	0.183444
GO:0001751	compound eye photoreceptor cell differentiation	2	0.889367	0.2228
GO:0001654	eye development	1	0.426896	0.352629
GO:0007423	sensory organ development	3	2.13448	0.360359
GO:0001745	compound eye morphogenesis	3	2.9527	0.570646
Cluster 19: aromatic amino acid family metabolic process
observed gene count: 1
expected gene count: 0.213448161642928
uncorrected p-value: 0.195371033209469
GO ID	term	observed gene count	expected gene count	uncorrected p-value
GO:0009072	aromatic amino acid family metabolic process	1	0.213448	0.195371
Cluster 20: aromatic amino acid family metabolic process
observed gene count: 1
expected gene count: 0.213448161642928
uncorrected p-value: 0.195371033209469
GO ID	term	observed gene count	expected gene count	uncorrected p-value
GO:0009072	aromatic amino acid family metabolic process	1	0.213448	0.195371
Cluster 21: eye development
observed gene count: 11
expected gene count: 8.3244783040742
uncorrected p-value: 0.212851557071075
GO ID	term	observed gene count	expected gene count	uncorrected p-value
GO:0007400	neuroblast fate determination	4	0.960517	0.0145119
GO:0001709	cell fate determination	3	0.924942	0.0635213
GO:0048749	compound eye development	7	4.09109	0.115784
GO:0007422	peripheral nervous system development	5	2.88155	0.161433
GO:0045165	cell fate commitment	2	0.782643	0.183444
GO:0001654	eye development	1	0.426896	0.352629
Cluster 22: gonad development
observed gene count: 3
expected gene count: 1.70758529314342
uncorrected p-value: 0.243193449634593
GO ID	term	observed gene count	expected gene count	uncorrected p-value
GO:0008406	gonad development	3	1.17396	0.111471
Cluster 23: stem cell maintenance
observed gene count: 11
expected gene count: 9.35614441868168
uncorrected p-value: 0.334775071573993
GO ID	term	observed gene count	expected gene count	uncorrected p-value
GO:0007297	ovarian follicle cell migration	3	0.391322	0.00596638
GO:0007424	open tracheal system development	6	3.77092	0.176211
GO:0019827	stem cell maintenance	1	0.249023	0.224007
GO:0007298	border follicle cell migration	5	3.30845	0.236204
GO:0030707	ovarian follicle cell development	2	1.92103	0.577348
GO:0007281	germ cell development	1	1.06724	0.663027
Cluster 24: hexose metabolic process
observed gene count: 1
expected gene count: 0.426896323285856
uncorrected p-value: 0.352629220777432
GO ID	term	observed gene count	expected gene count	uncorrected p-value
GO:0019318	hexose metabolic process	1	0.177873	0.165681
Cluster 25: synaptic transmission
observed gene count: 7
expected gene count: 5.76310036435906
uncorrected p-value: 0.354754519829515
GO ID	term	observed gene count	expected gene count	uncorrected p-value
GO:0007270	nerve-nerve synaptic transmission	3	0.142299	0.000174365
GO:0006836	neurotransmitter transport	2	0.853793	0.209589
GO:0048489	synaptic vesicle transport	1	0.391322	0.328732
GO:0007268	synaptic transmission	2	1.67201	0.502154
GO:0007269	neurotransmitter secretion	2	3.27287	0.843982
Cluster 26: response to heat
observed gene count: 3
expected gene count: 2.45465385889367
uncorrected p-value: 0.446880974573698
GO ID	term	observed gene count	expected gene count	uncorrected p-value
GO:0009408	response to heat	3	2.3835	0.427993
Cluster 27: oogenesis
observed gene count: 31
expected gene count: 29.9894667108314
uncorrected p-value: 0.450743161305539
GO ID	term	observed gene count	expected gene count	uncorrected p-value
GO:0008354	germ cell migration	6	1.20954	0.00113382
GO:0007297	ovarian follicle cell migration	3	0.391322	0.00596638
GO:0007369	gastrulation	3	0.889367	0.0576586
GO:0048477	oogenesis	11	7.07936	0.0989362
GO:0006355	regulation of transcription, DNA-dependent	17	12.5934	0.130015
GO:0030707	ovarian follicle cell development	2	1.92103	0.577348
GO:0032504	multicellular organism reproduction	5	7.75528	0.891552
Cluster 28: microtubule-based process
observed gene count: 3
expected gene count: 2.59695263332229
uncorrected p-value: 0.483868231298769
GO ID	term	observed gene count	expected gene count	uncorrected p-value
GO:0000226	microtubule cytoskeleton organization	3	1.10282	0.0966238
GO:0007017	microtubule-based process	1	1.67201	0.81825
Cluster 29: protein transport
observed gene count: 7
expected gene count: 7.04378933421663
uncorrected p-value: 0.560602738974723
GO ID	term	observed gene count	expected gene count	uncorrected p-value
GO:0015031	protein transport	3	2.3835	0.427993
GO:0006886	intracellular protein transport	3	2.6681	0.501915
GO:0008104	protein localization	1	1.60086	0.804551
Cluster 30: endocytosis
observed gene count: 11
expected gene count: 11.490626035111
uncorrected p-value: 0.602087786887089
GO ID	term	observed gene count	expected gene count	uncorrected p-value
GO:0006897	endocytosis	2	1.49414	0.443426
GO:0006911	phagocytosis, engulfment	7	6.36787	0.453942
GO:0006909	phagocytosis	1	0.640344	0.479198
GO:0016192	vesicle-mediated transport	1	3.05942	0.956025
Cluster 31: cell motion
observed gene count: 12
expected gene count: 12.9491884730043
uncorrected p-value: 0.647712327410121
GO ID	term	observed gene count	expected gene count	uncorrected p-value
GO:0007411	axon guidance	10	5.51408	0.0503118
GO:0006928	cell motion	1	0.142299	0.134897
GO:0000902	cell morphogenesis	2	1.67201	0.502154
GO:0007409	axonogenesis	1	1.77873	0.837023
GO:0048812	neuron projection morphogenesis	1	3.73534	0.978002
Cluster 32: sensory perception of chemical stimulus
observed gene count: 3
expected gene count: 3.41517058628685
uncorrected p-value: 0.668946775535589
GO ID	term	observed gene count	expected gene count	uncorrected p-value
GO:0007606	sensory perception of chemical stimulus	3	3.27287	0.640558
Cluster 33: phosphorylation
observed gene count: 8
expected gene count: 9.21384564425306
uncorrected p-value: 0.707151385802023
GO ID	term	observed gene count	expected gene count	uncorrected p-value
GO:0016310	phosphorylation	1	0.924942	0.610383
GO:0006468	protein amino acid phosphorylation	7	8.2889	0.727328
Cluster 34: cytoskeleton organization
observed gene count: 4
expected gene count: 4.87373302418019
uncorrected p-value: 0.723053224810053
GO ID	term	observed gene count	expected gene count	uncorrected p-value
GO:0007010	cytoskeleton organization	2	1.52971	0.455483
GO:0007015	actin filament organization	2	2.45465	0.709506
Cluster 35: imaginal disc pattern formation
observed gene count: 1
expected gene count: 1.70758529314342
uncorrected p-value: 0.824735879288649
GO ID	term	observed gene count	expected gene count	uncorrected p-value
GO:0007447	imaginal disc pattern formation	1	0.391322	0.328732
GO:0009953	dorsal/ventral pattern formation	1	0.960517	0.624267
Cluster 36: chitin metabolic process
observed gene count: 2
expected gene count: 3.34402119907254
uncorrected p-value: 0.852496032781788
GO ID	term	observed gene count	expected gene count	uncorrected p-value
GO:0006030	chitin metabolic process	2	3.2373	0.839559
Cluster 37: cation transport
observed gene count: 3
expected gene count: 4.87373302418019
uncorrected p-value: 0.870155049088152
GO ID	term	observed gene count	expected gene count	uncorrected p-value
GO:0006814	sodium ion transport	2	1.84988	0.556736
GO:0006812	cation transport	1	0.996091	0.637658
Cluster 38: compound eye morphogenesis
observed gene count: 5
expected gene count: 7.50626035110964
uncorrected p-value: 0.874737391481682
GO ID	term	observed gene count	expected gene count	uncorrected p-value
GO:0001738	morphogenesis of a polarized epithelium	1	0.569195	0.440023
GO:0001700	embryonic development via the syncytial blastoderm	2	1.77873	0.535421
GO:0001745	compound eye morphogenesis	3	2.9527	0.570646
GO:0007163	establishment or maintenance of cell polarity	1	1.13839	0.686622
Cluster 39: spermatogenesis
observed gene count: 2
expected gene count: 4.34011262007287
uncorrected p-value: 0.934500257538368
GO ID	term	observed gene count	expected gene count	uncorrected p-value
GO:0007281	germ cell development	1	1.06724	0.663027
GO:0007283	spermatogenesis	1	3.3796	0.968322

## Sheet: FatPrepupae+2d
sample name: FatPrepupae+2d
number of associated genes in the sample: 967
Cluster 1: chitin metabolic process
observed gene count: 19
expected gene count: 5.82954620735343
uncorrected p-value: 3.92877546030081e-06
GO ID	term	observed gene count	expected gene count	uncorrected p-value
GO:0006030	chitin metabolic process	19	5.82955	3.92878e-06
Cluster 2: N-acetylglucosamine metabolic process
observed gene count: 3
expected gene count: 0.512487578668433
uncorrected p-value: 0.0115036123850683
GO ID	term	observed gene count	expected gene count	uncorrected p-value
GO:0006044	N-acetylglucosamine metabolic process	3	0.512488	0.0115036
Cluster 3: chitin catabolic process
observed gene count: 4
expected gene count: 1.21715799933753
uncorrected p-value: 0.0299586656973908
GO ID	term	observed gene count	expected gene count	uncorrected p-value
GO:0006032	chitin catabolic process	4	1.02498	0.0163811
Cluster 4: open tracheal system development
observed gene count: 12
expected gene count: 7.6873136800265
uncorrected p-value: 0.0828767250623678
GO ID	term	observed gene count	expected gene count	uncorrected p-value
GO:0035151	regulation of tube size, open tracheal system	4	1.1531	0.0248797
GO:0007424	open tracheal system development	12	6.79046	0.0384456
GO:0035152	regulation of tube architecture, open tracheal system	2	0.832792	0.200805
Cluster 5: cell death
observed gene count: 14
expected gene count: 9.60914210003312
uncorrected p-value: 0.100426720645301
GO ID	term	observed gene count	expected gene count	uncorrected p-value
GO:0008219	cell death	3	0.70467	0.029343
GO:0035071	salivary gland cell autophagic cell death	7	4.22802	0.128408
GO:0048102	autophagic cell death	6	3.65147	0.15626
GO:0012501	programmed cell death	2	0.960914	0.249223
GO:0007435	salivary gland morphogenesis	4	3.20305	0.399656
GO:0035070	salivary gland histolysis	1	0.512488	0.411257
Cluster 6: apoptosis
observed gene count: 9
expected gene count: 5.63736336535277
uncorrected p-value: 0.109924619595598
GO ID	term	observed gene count	expected gene count	uncorrected p-value
GO:0010941	regulation of cell death	3	0.384366	0.00452694
GO:0008219	cell death	3	0.70467	0.029343
GO:0042981	regulation of apoptosis	3	1.28122	0.132842
GO:0012501	programmed cell death	2	0.960914	0.249223
GO:0043068	positive regulation of programmed cell death	1	0.320305	0.281845
GO:0006915	apoptosis	3	2.81868	0.541694
Cluster 7: axis specification
observed gene count: 6
expected gene count: 3.84365684001325
uncorrected p-value: 0.184694839648706
GO ID	term	observed gene count	expected gene count	uncorrected p-value
GO:0009798	axis specification	3	0.512488	0.0115036
GO:0009950	dorsal/ventral axis specification	3	1.92183	0.301322
Cluster 8: cell adhesion
observed gene count: 13
expected gene count: 10.057568731368
uncorrected p-value: 0.20663396029997
GO ID	term	observed gene count	expected gene count	uncorrected p-value
GO:0016339	calcium-dependent cell-cell adhesion	7	1.4734	0.000428098
GO:0007156	homophilic cell adhesion	7	1.98589	0.00292988
GO:0007155	cell adhesion	7	7.62325	0.646525
Cluster 9: tube development
observed gene count: 3
expected gene count: 1.66558463067241
uncorrected p-value: 0.230560803425229
GO ID	term	observed gene count	expected gene count	uncorrected p-value
GO:0035295	tube development	1	0.0640609	0.0640609
GO:0035152	regulation of tube architecture, open tracheal system	2	0.832792	0.200805
Cluster 10: response to oxidative stress
observed gene count: 6
expected gene count: 4.42020536601524
uncorrected p-value: 0.279875966650849
GO ID	term	observed gene count	expected gene count	uncorrected p-value
GO:0000302	response to reactive oxygen species	1	0.448427	0.370941
GO:0006979	response to oxidative stress	5	4.03584	0.378317
Cluster 11: negative regulation of translation
observed gene count: 3
expected gene count: 2.04995031467373
uncorrected p-value: 0.337194979553692
GO ID	term	observed gene count	expected gene count	uncorrected p-value
GO:0017148	negative regulation of translation	3	1.40934	0.163706
Cluster 12: cell motion
observed gene count: 6
expected gene count: 4.86863199735012
uncorrected p-value: 0.360072041262157
GO ID	term	observed gene count	expected gene count	uncorrected p-value
GO:0007427	epithelial cell migration, open tracheal system	4	1.98589	0.133963
GO:0006928	cell motion	1	0.256244	0.232677
GO:0016477	cell migration	2	1.4734	0.438616
Cluster 13: sensory perception of chemical stimulus
observed gene count: 6
expected gene count: 5.95766810202054
uncorrected p-value: 0.553104700239481
GO ID	term	observed gene count	expected gene count	uncorrected p-value
GO:0007606	sensory perception of chemical stimulus	6	5.89361	0.54236
Cluster 14: metamorphosis
observed gene count: 38
expected gene count: 39.2693607154687
uncorrected p-value: 0.609197404854357
GO ID	term	observed gene count	expected gene count	uncorrected p-value
GO:0009913	epidermal cell differentiation	4	0.384366	0.000226192
GO:0035017	cuticle pattern formation	4	0.960914	0.012929
GO:0001737	establishment of imaginal disc-derived wing hair orientation	5	1.60152	0.0193921
GO:0035316	non-sensory hair organization	2	0.256244	0.0225522
GO:0007552	metamorphosis	6	2.30619	0.025427
GO:0042067	establishment of ommatidial polarity	5	1.85777	0.0351364
GO:0035317	imaginal disc-derived wing hair organization	3	1.1531	0.104314
GO:0001736	establishment of planar polarity	3	1.92183	0.301322
GO:0007163	establishment or maintenance of cell polarity	3	2.04995	0.337195
GO:0002009	morphogenesis of an epithelium	2	1.60152	0.482136
GO:0002165	instar larval or pupal development	1	0.70467	0.517369
GO:0007423	sensory organ development	4	3.84366	0.541404
GO:0008544	epidermis development	1	0.896853	0.604372
GO:0001738	morphogenesis of a polarized epithelium	1	1.02498	0.653483
GO:0007476	imaginal disc-derived wing morphogenesis	11	12.62	0.723985
GO:0048749	compound eye development	6	7.36701	0.75366
GO:0007398	ectoderm development	1	1.4734	0.782131
GO:0007444	imaginal disc development	1	2.11401	0.887765
GO:0001745	compound eye morphogenesis	1	5.31706	0.995956
Cluster 15: olfactory behavior
observed gene count: 2
expected gene count: 2.94680357734349
uncorrected p-value: 0.803080495084974
GO ID	term	observed gene count	expected gene count	uncorrected p-value
GO:0042048	olfactory behavior	2	2.75462	0.771612
Cluster 16: regulation of transcription, DNA-dependent
observed gene count: 19
expected gene count: 22.7416363034117
uncorrected p-value: 0.823088565783706
GO ID	term	observed gene count	expected gene count	uncorrected p-value
GO:0006355	regulation of transcription, DNA-dependent	19	22.6776	0.819539
Cluster 17: axis specification
observed gene count: 6
expected gene count: 8.39198410069559
uncorrected p-value: 0.851967534359797
GO ID	term	observed gene count	expected gene count	uncorrected p-value
GO:0009798	axis specification	3	0.512488	0.0115036
GO:0009952	anterior/posterior pattern formation	3	1.1531	0.104314
GO:0007354	zygotic determination of anterior/posterior axis, embryo	1	0.512488	0.411257
GO:0007389	pattern specification process	1	1.34528	0.751237
GO:0009880	embryonic pattern specification	1	1.40934	0.767196
Cluster 18: positive regulation of gene expression
observed gene count: 7
expected gene count: 9.67320304736668
uncorrected p-value: 0.857780145748117
GO ID	term	observed gene count	expected gene count	uncorrected p-value
GO:0010628	positive regulation of gene expression	1	1.08904	0.675705
GO:0010629	negative regulation of gene expression	3	3.71553	0.727248
GO:0045892	negative regulation of transcription, DNA-dependent	3	5.253	0.903324
Cluster 19: mating behavior
observed gene count: 1
expected gene count: 2.11401126200729
uncorrected p-value: 0.887764958353367
GO ID	term	observed gene count	expected gene count	uncorrected p-value
GO:0007617	mating behavior	1	0.576549	0.448993
GO:0007619	courtship behavior	1	1.66558	0.821435
Cluster 20: ion transport
observed gene count: 3
expected gene count: 5.57330241801921
uncorrected p-value: 0.923428937035786
GO ID	term	observed gene count	expected gene count	uncorrected p-value
GO:0030001	metal ion transport	1	0.640609	0.484312
GO:0006812	cation transport	1	1.79371	0.843618
GO:0006811	ion transport	1	3.07493	0.958537
Cluster 21: immune response
observed gene count: 12
expected gene count: 18.1292480953958
uncorrected p-value: 0.954993077405227
GO ID	term	observed gene count	expected gene count	uncorrected p-value
GO:0050830	defense response to Gram-positive bacterium	6	2.69056	0.0496582
GO:0006959	humoral immune response	3	1.34528	0.148011
GO:0050832	defense response to fungus	5	2.88274	0.15904
GO:0019731	antibacterial humoral response	3	1.66558	0.230561
GO:0009617	response to bacterium	2	1.4734	0.438616
GO:0042742	defense response to bacterium	4	3.65147	0.500456
GO:0050829	defense response to Gram-negative bacterium	3	3.26711	0.642892
GO:0006952	defense response	4	6.47016	0.894749
GO:0045087	innate immune response	1	2.49838	0.924631
GO:0019730	antimicrobial humoral response	1	2.6265	0.934002
GO:0006955	immune response	1	3.20305	0.963695
Cluster 22: head involution
observed gene count: 3
expected gene count: 6.85452136469029
uncorrected p-value: 0.971140555584732
GO ID	term	observed gene count	expected gene count	uncorrected p-value
GO:0008258	head involution	3	2.6265	0.493572
GO:0001700	embryonic development via the syncytial blastoderm	1	3.20305	0.963695
Cluster 23: axonogenesis
observed gene count: 13
expected gene count: 21.0119907254058
uncorrected p-value: 0.979902953840775
GO ID	term	observed gene count	expected gene count	uncorrected p-value
GO:0016358	dendrite development	1	0.128122	0.124022
GO:0000902	cell morphogenesis	2	3.01086	0.812681
GO:0007409	axonogenesis	2	3.20305	0.839019
GO:0048813	dendrite morphogenesis	6	8.45605	0.856869
GO:0048666	neuron development	1	2.6265	0.934002
GO:0048812	neuron projection morphogenesis	3	6.7264	0.968096
Cluster 24: aging
observed gene count: 4
expected gene count: 9.28883736336535
uncorrected p-value: 0.985472538690126
GO ID	term	observed gene count	expected gene count	uncorrected p-value
GO:0010259	multicellular organismal aging	1	0.0640609	0.0640609
GO:0007568	aging	1	0.320305	0.281845
GO:0008340	determination of adult life span	3	9.22478	0.995847
Cluster 25: response to heat
observed gene count: 1
expected gene count: 4.42020536601524
uncorrected p-value: 0.989732896800011
GO ID	term	observed gene count	expected gene count	uncorrected p-value
GO:0009408	response to heat	1	4.29208	0.988272
Cluster 26: regulation of mitosis
observed gene count: 3
expected gene count: 8.45604504802915
uncorrected p-value: 0.992093054751495
GO ID	term	observed gene count	expected gene count	uncorrected p-value
GO:0007088	regulation of mitosis	2	1.53746	0.460633
GO:0051726	regulation of cell cycle	1	5.18894	0.99538
Cluster 27: phagocytosis
observed gene count: 11
expected gene count: 20.691685988738
uncorrected p-value: 0.994321409503233
GO ID	term	observed gene count	expected gene count	uncorrected p-value
GO:0006909	phagocytosis	1	1.1531	0.696503
GO:0006911	phagocytosis, engulfment	8	11.4669	0.893763
GO:0016192	vesicle-mediated transport	3	5.50924	0.919743
Cluster 28: transcription, DNA-dependent
observed gene count: 1
expected gene count: 5.63736336535277
uncorrected p-value: 0.997101204521445
GO ID	term	observed gene count	expected gene count	uncorrected p-value
GO:0006351	transcription, DNA-dependent	1	2.88274	0.949396
Cluster 29: oogenesis
observed gene count: 17
expected gene count: 29.9164624047698
uncorrected p-value: 0.997153291548321
GO ID	term	observed gene count	expected gene count	uncorrected p-value
GO:0030707	ovarian follicle cell development	2	3.45929	0.868912
GO:0032504	multicellular organism reproduction	9	13.9653	0.944069
GO:0048477	oogenesis	6	12.7481	0.98969
Cluster 30: phosphorylation
observed gene count: 6
expected gene count: 16.5917853593905
uncorrected p-value: 0.999366415217983
GO ID	term	observed gene count	expected gene count	uncorrected p-value
GO:0016310	phosphorylation	1	1.66558	0.821435
GO:0006468	protein amino acid phosphorylation	5	14.9262	0.999358
Cluster 31: RNA splicing
observed gene count: 5
expected gene count: 16.0152368333885
uncorrected p-value: 0.999732614729404
GO ID	term	observed gene count	expected gene count	uncorrected p-value
GO:0008380	RNA splicing	1	0.896853	0.604372
GO:0000398	nuclear mRNA splicing, via spliceosome	5	13.645	0.998248
Cluster 32: protein transport
observed gene count: 11
expected gene count: 30.6851937727724
uncorrected p-value: 0.999993233949784
GO ID	term	observed gene count	expected gene count	uncorrected p-value
GO:0045184	establishment of protein localization	1	0.384366	0.327866
GO:0015031	protein transport	4	4.29208	0.629656
GO:0008104	protein localization	1	2.88274	0.949396
GO:0055085	transmembrane transport	6	17.7449	0.99974
Cluster 33: mitotic cell cycle
observed gene count: 6
expected gene count: 22.6135144087446
uncorrected p-value: 0.999995050895802
GO ID	term	observed gene count	expected gene count	uncorrected p-value
GO:0000278	mitotic cell cycle	1	2.04995	0.880066
GO:0007010	cytoskeleton organization	1	2.75462	0.942209
GO:0007052	mitotic spindle organization	4	12.0435	0.998328

## Sheet: SalivaryGlandsL3
sample name: SalivaryGlandsL3
number of associated genes in the sample: 342
Cluster 1: cell death
observed gene count: 15
expected gene count: 4.35004968532627
uncorrected p-value: 3.24101713823843e-05
GO ID	term	observed gene count	expected gene count	uncorrected p-value
GO:0035071	salivary gland cell autophagic cell death	9	1.49533	1.68083e-05
GO:0048102	autophagic cell death	7	1.29142	0.000287897
GO:0012501	programmed cell death	4	0.339848	0.000289981
GO:0008219	cell death	2	0.249222	0.0245927
GO:0035070	salivary gland histolysis	1	0.181252	0.167548
GO:0007435	salivary gland morphogenesis	2	1.13283	0.313582
GO:0007431	salivary gland development	1	0.566413	0.436388
GO:0007552	metamorphosis	1	0.815634	0.562196
Cluster 2: protein processing
observed gene count: 5
expected gene count: 0.589069228221265
uncorrected p-value: 0.000257705944900759
GO ID	term	observed gene count	expected gene count	uncorrected p-value
GO:0006465	signal peptide processing	4	0.135939	3.74707e-06
GO:0016485	protein processing	1	0.407817	0.338168
Cluster 3: protein transport
observed gene count: 12
expected gene count: 4.89380589599205
uncorrected p-value: 0.0038577780876014
GO ID	term	observed gene count	expected gene count	uncorrected p-value
GO:0006614	SRP-dependent cotranslational protein targeting to membrane	5	0.249222	2.39469e-06
GO:0015031	protein transport	3	1.51799	0.193979
GO:0006886	intracellular protein transport	3	1.69924	0.241432
GO:0046907	intracellular transport	1	0.317191	0.274562
GO:0008104	protein localization	1	1.01954	0.643989
Cluster 4: puparial adhesion
observed gene count: 3
expected gene count: 0.566412719443524
uncorrected p-value: 0.0183302147933007
GO ID	term	observed gene count	expected gene count	uncorrected p-value
GO:0007594	puparial adhesion	3	0.271878	0.00217849
Cluster 5: membrane organization
observed gene count: 12
expected gene count: 7.31805233521033
uncorrected p-value: 0.064682273166728
GO ID	term	observed gene count	expected gene count	uncorrected p-value
GO:0016192	vesicle-mediated transport	8	1.94846	0.000730602
GO:0016044	membrane organization	1	0.294535	0.25773
GO:0006911	phagocytosis, engulfment	4	4.05552	0.580832
Cluster 6: neurotransmitter transport
observed gene count: 7
expected gene count: 3.62504140443856
uncorrected p-value: 0.07201461959465
GO ID	term	observed gene count	expected gene count	uncorrected p-value
GO:0007269	neurotransmitter secretion	5	2.0844	0.0578709
GO:0006836	neurotransmitter transport	2	0.543756	0.101947
GO:0048489	synaptic vesicle transport	1	0.249222	0.22289
Cluster 7: olfactory behavior
observed gene count: 3
expected gene count: 1.11016893010931
uncorrected p-value: 0.0992474128402016
GO ID	term	observed gene count	expected gene count	uncorrected p-value
GO:0042048	olfactory behavior	3	0.97423	0.0732334
Cluster 8: oogenesis
observed gene count: 17
expected gene count: 12.2345147399801
uncorrected p-value: 0.107973368452804
GO ID	term	observed gene count	expected gene count	uncorrected p-value
GO:0048477	oogenesis	8	4.50865	0.0835689
GO:0009880	embryonic pattern specification	2	0.498443	0.0878419
GO:0009953	dorsal/ventral pattern formation	2	0.611726	0.124147
GO:0032504	multicellular organism reproduction	6	4.93912	0.373116
GO:0009950	dorsal/ventral axis specification	1	0.679695	0.497511
Cluster 9: cell redox homeostasis
observed gene count: 3
expected gene count: 1.17813845644253
uncorrected p-value: 0.113460648767499
GO ID	term	observed gene count	expected gene count	uncorrected p-value
GO:0045454	cell redox homeostasis	3	1.13283	0.103901
Cluster 10: negative regulation of translation
observed gene count: 2
expected gene count: 0.725008280887711
uncorrected p-value: 0.163297046561846
GO ID	term	observed gene count	expected gene count	uncorrected p-value
GO:0017148	negative regulation of translation	2	0.498443	0.0878419
Cluster 11: morphogenesis of an epithelium
observed gene count: 4
expected gene count: 2.19768135144087
uncorrected p-value: 0.177839242772753
GO ID	term	observed gene count	expected gene count	uncorrected p-value
GO:0002009	morphogenesis of an epithelium	2	0.566413	0.109218
GO:0001738	morphogenesis of a polarized epithelium	1	0.362504	0.307092
GO:0001700	embryonic development via the syncytial blastoderm	2	1.13283	0.313582
Cluster 12: eye morphogenesis
observed gene count: 7
expected gene count: 5.46021861543557
uncorrected p-value: 0.306022471976432
GO ID	term	observed gene count	expected gene count	uncorrected p-value
GO:0048592	eye morphogenesis	1	0.181252	0.167548
GO:0001745	compound eye morphogenesis	3	1.88049	0.290524
GO:0007423	sensory organ development	2	1.35939	0.395738
GO:0048749	compound eye development	2	2.6055	0.738381
Cluster 13: regulation of apoptosis
observed gene count: 3
expected gene count: 2.19768135144087
uncorrected p-value: 0.377417214971102
GO ID	term	observed gene count	expected gene count	uncorrected p-value
GO:0043066	negative regulation of apoptosis	3	1.17814	0.113461
GO:0042981	regulation of apoptosis	1	0.45313	0.367854
Cluster 14: metal ion transport
observed gene count: 2
expected gene count: 1.97111626366346
uncorrected p-value: 0.589936746300633
GO ID	term	observed gene count	expected gene count	uncorrected p-value
GO:0030001	metal ion transport	2	0.226565	0.0204234
Cluster 15: cell adhesion
observed gene count: 5
expected gene count: 5.46021861543557
uncorrected p-value: 0.640729754036644
GO ID	term	observed gene count	expected gene count	uncorrected p-value
GO:0007264	small GTPase mediated signal transduction	3	1.72189	0.247501
GO:0007155	cell adhesion	4	2.69612	0.283982
GO:0008360	regulation of cell shape	3	2.01643	0.327804
Cluster 16: border follicle cell migration
observed gene count: 3
expected gene count: 3.55707187810533
uncorrected p-value: 0.69425760957149
GO ID	term	observed gene count	expected gene count	uncorrected p-value
GO:0030707	ovarian follicle cell development	3	1.22345	0.123339
GO:0007298	border follicle cell migration	3	2.10706	0.352666
Cluster 17: regulation of transcription, DNA-dependent
observed gene count: 6
expected gene count: 8.04306061609805
uncorrected p-value: 0.819051181587711
GO ID	term	observed gene count	expected gene count	uncorrected p-value
GO:0006355	regulation of transcription, DNA-dependent	6	8.0204	0.816999
Cluster 18: neuron development
observed gene count: 1
expected gene count: 2.2656508777741
uncorrected p-value: 0.899675656786531
GO ID	term	observed gene count	expected gene count	uncorrected p-value
GO:0048666	neuron development	1	0.928917	0.609709
Cluster 19: cell cycle
observed gene count: 2
expected gene count: 4.05551507121563
uncorrected p-value: 0.916099790266561
GO ID	term	observed gene count	expected gene count	uncorrected p-value
GO:0007049	cell cycle	1	0.838291	0.572139
GO:0007017	microtubule-based process	1	1.06486	0.659986
Cluster 20: regulation of cell cycle
observed gene count: 1
expected gene count: 2.51487247432925
uncorrected p-value: 0.922169467264053
GO ID	term	observed gene count	expected gene count	uncorrected p-value
GO:0051726	regulation of cell cycle	1	1.83518	0.844526

## Sheet: SalivaryGlandsPrepupae
sample name: SalivaryGlandsPrepupae
number of associated genes in the sample: 630
Cluster 1: cell death
observed gene count: 45
expected gene count: 9.55746936071547
uncorrected p-value: 1.75302290658297e-18
GO ID	term	observed gene count	expected gene count	uncorrected p-value
GO:0035071	salivary gland cell autophagic cell death	22	2.75455	1.01302e-14
GO:0048102	autophagic cell death	20	2.37893	5.43271e-14
GO:0007552	metamorphosis	7	1.50248	0.000618767
GO:0012501	programmed cell death	4	0.626035	0.00283871
GO:0008219	cell death	3	0.459092	0.00928693
GO:0007435	salivary gland morphogenesis	6	2.08678	0.0172388
GO:0007431	salivary gland development	4	1.04339	0.0189182
GO:0007444	imaginal disc development	4	1.37728	0.0471923
GO:0035070	salivary gland histolysis	1	0.333885	0.289036
GO:0002165	instar larval or pupal development	1	0.459092	0.374439
Cluster 2: metamorphosis
observed gene count: 37
expected gene count: 16.4438555813183
uncorrected p-value: 3.58013253417457e-06
GO ID	term	observed gene count	expected gene count	uncorrected p-value
GO:0007552	metamorphosis	7	1.50248	0.000618767
GO:0007476	imaginal disc-derived wing morphogenesis	16	8.22193	0.00850556
GO:0035220	wing disc development	7	2.96323	0.0282637
GO:0035120	post-embryonic appendage morphogenesis	1	0.0417357	0.0417357
GO:0007444	imaginal disc development	4	1.37728	0.0471923
GO:0007517	muscle organ development	5	2.62935	0.122087
GO:0007472	wing disc morphogenesis	1	0.709506	0.515739
Cluster 3: immune response
observed gene count: 31
expected gene count: 12.7711162636635
uncorrected p-value: 4.80975426297977e-06
GO ID	term	observed gene count	expected gene count	uncorrected p-value
GO:0042742	defense response to bacterium	13	2.37893	4.63499e-07
GO:0006955	immune response	8	2.08678	0.00100204
GO:0050829	defense response to Gram-negative bacterium	8	2.12852	0.0011458
GO:0050832	defense response to fungus	7	1.87811	0.00243173
GO:0008063	Toll signaling pathway	6	1.50248	0.00344916
GO:0019731	antibacterial humoral response	5	1.08513	0.00395338
GO:0019732	antifungal humoral response	3	0.375621	0.0050324
GO:0019730	antimicrobial humoral response	6	1.71116	0.00667884
GO:0009620	response to fungus	3	0.459092	0.00928693
GO:0045087	innate immune response	5	1.62769	0.0222143
GO:0006952	defense response	9	4.2153	0.0251644
GO:0050830	defense response to Gram-positive bacterium	5	1.7529	0.0296609
GO:0002920	regulation of humoral immune response	1	0.0417357	0.0417357
GO:0006959	humoral immune response	3	0.876449	0.0550277
GO:0009617	response to bacterium	3	0.959921	0.0689611
GO:0006963	positive regulation of antibacterial peptide biosynthetic process	2	0.626035	0.127699
Cluster 4: endocytosis
observed gene count: 32
expected gene count: 13.4806227227559
uncorrected p-value: 5.42100542692061e-06
GO ID	term	observed gene count	expected gene count	uncorrected p-value
GO:0006911	phagocytosis, engulfment	17	7.47069	0.00135364
GO:0016192	vesicle-mediated transport	10	3.58927	0.00303746
GO:0006897	endocytosis	6	1.7529	0.00752358
GO:0016044	membrane organization	1	0.542564	0.425604
GO:0006909	phagocytosis	1	0.751242	0.535972
Cluster 5: apoptosis
observed gene count: 17
expected gene count: 6.26035110963895
uncorrected p-value: 0.000175037591533756
GO ID	term	observed gene count	expected gene count	uncorrected p-value
GO:0006917	induction of apoptosis	6	0.792978	8.78484e-05
GO:0006915	apoptosis	8	1.83637	0.000412114
GO:0043066	negative regulation of apoptosis	7	2.17026	0.00557832
GO:0043065	positive regulation of apoptosis	2	0.375621	0.0515299
GO:0043068	positive regulation of programmed cell death	1	0.208678	0.191995
GO:0042981	regulation of apoptosis	2	0.834713	0.202329
GO:0043069	negative regulation of programmed cell death	1	0.29215	0.258056
Cluster 6: phosphorylation
observed gene count: 23
expected gene count: 10.8095395826433
uncorrected p-value: 0.000548168304214528
GO ID	term	observed gene count	expected gene count	uncorrected p-value
GO:0006468	protein amino acid phosphorylation	21	9.72441	0.00077636
GO:0016310	phosphorylation	3	1.08513	0.0924895
Cluster 7: stem cell differentiation
observed gene count: 8
expected gene count: 2.04504802914872
uncorrected p-value: 0.000873078544160167
GO ID	term	observed gene count	expected gene count	uncorrected p-value
GO:0030718	germ-line stem cell maintenance	6	1.54422	0.00397428
GO:0045596	negative regulation of cell differentiation	1	0.166943	0.156794
GO:0048863	stem cell differentiation	1	0.208678	0.191995
Cluster 8: regulation of proteolysis
observed gene count: 10
expected gene count: 3.213646902948
uncorrected p-value: 0.00131462744675898
GO ID	term	observed gene count	expected gene count	uncorrected p-value
GO:0045879	negative regulation of smoothened signaling pathway	4	0.626035	0.00283871
GO:0030111	regulation of Wnt receptor signaling pathway	4	0.626035	0.00283871
GO:0030162	regulation of proteolysis	6	1.87811	0.0105178
GO:0009968	negative regulation of signal transduction	1	0.166943	0.156794
GO:0008589	regulation of smoothened signaling pathway	1	0.375621	0.318725
Cluster 9: oogenesis
observed gene count: 33
expected gene count: 18.8645246770454
uncorrected p-value: 0.00133282390252439
GO ID	term	observed gene count	expected gene count	uncorrected p-value
GO:0048477	oogenesis	16	8.3054	0.00932629
GO:0030707	ovarian follicle cell development	6	2.25373	0.0243884
GO:0007276	gamete generation	1	0.166943	0.156794
GO:0032504	multicellular organism reproduction	12	9.09838	0.201158
Cluster 10: protein transport
observed gene count: 18
expected gene count: 8.26366346472342
uncorrected p-value: 0.00162911672962617
GO ID	term	observed gene count	expected gene count	uncorrected p-value
GO:0015031	protein transport	8	2.79629	0.00655817
GO:0070727	cellular macromolecule localization	1	0.0417357	0.0417357
GO:0006886	intracellular protein transport	6	3.13018	0.0927021
GO:0008104	protein localization	3	1.87811	0.289553
GO:0046907	intracellular transport	1	0.584299	0.449598
Cluster 11: response to heat
observed gene count: 9
expected gene count: 2.87976151043392
uncorrected p-value: 0.00219541382604295
GO ID	term	observed gene count	expected gene count	uncorrected p-value
GO:0009408	response to heat	9	2.79629	0.00178304
Cluster 12: cell migration
observed gene count: 15
expected gene count: 6.55250082808877
uncorrected p-value: 0.00239211179804985
GO ID	term	observed gene count	expected gene count	uncorrected p-value
GO:0007298	border follicle cell migration	13	3.88142	0.000123766
GO:0030707	ovarian follicle cell development	6	2.25373	0.0243884
GO:0016477	cell migration	2	0.959921	0.249102
Cluster 13: dorsal closure
observed gene count: 16
expected gene count: 7.34547863530971
uncorrected p-value: 0.00288688378144719
GO ID	term	observed gene count	expected gene count	uncorrected p-value
GO:0002009	morphogenesis of an epithelium	6	1.04339	0.000462955
GO:0007391	dorsal closure	8	3.71447	0.0322257
GO:0060429	epithelium development	1	0.125207	0.120062
GO:0016331	morphogenesis of embryonic epithelium	1	0.333885	0.289036
GO:0001700	embryonic development via the syncytial blastoderm	2	2.08678	0.623429
Cluster 14: puparial adhesion
observed gene count: 5
expected gene count: 1.04339185160649
uncorrected p-value: 0.00330481206318809
GO ID	term	observed gene count	expected gene count	uncorrected p-value
GO:0007594	puparial adhesion	3	0.500828	0.0120034
GO:0007591	molting cycle, chitin-based cuticle	2	0.542564	0.100114
Cluster 15: nucleotide catabolic process
observed gene count: 3
expected gene count: 0.333885392514078
uncorrected p-value: 0.0034616480622736
GO ID	term	observed gene count	expected gene count	uncorrected p-value
GO:0009166	nucleotide catabolic process	3	0.333885	0.00346165
Cluster 16: protein ubiquitination
observed gene count: 6
expected gene count: 1.54421994037761
uncorrected p-value: 0.00397427817149408
GO ID	term	observed gene count	expected gene count	uncorrected p-value
GO:0016567	protein ubiquitination	6	1.54422	0.00397428
Cluster 17: hemopoiesis
observed gene count: 7
expected gene count: 2.12851937727724
uncorrected p-value: 0.00500313586242807
GO ID	term	observed gene count	expected gene count	uncorrected p-value
GO:0035099	hemocyte migration	5	0.751242	0.000678716
GO:0030031	cell projection assembly	2	0.584299	0.113689
GO:0030097	hemopoiesis	1	0.876449	0.591748
Cluster 18: RNA transport
observed gene count: 5
expected gene count: 1.25207022192779
uncorrected p-value: 0.00746716751310089
GO ID	term	observed gene count	expected gene count	uncorrected p-value
GO:0033227	dsRNA transport	4	1.00166	0.01642
GO:0050658	RNA transport	1	0.0834713	0.0817321
Cluster 19: regulation of Rab GTPase activity
observed gene count: 6
expected gene count: 1.75289831069891
uncorrected p-value: 0.00752358154350014
GO ID	term	observed gene count	expected gene count	uncorrected p-value
GO:0032313	regulation of Rab GTPase activity	5	1.08513	0.00395338
GO:0051056	regulation of small GTPase mediated signal transduction	1	0.333885	0.289036
Cluster 20: growth
observed gene count: 6
expected gene count: 1.75289831069891
uncorrected p-value: 0.00752358154350014
GO ID	term	observed gene count	expected gene count	uncorrected p-value
GO:0035265	organ growth	1	0.125207	0.120062
GO:0007446	imaginal disc growth	2	0.709506	0.15679
GO:0048589	developmental growth	1	0.166943	0.156794
GO:0040007	growth	2	0.876449	0.217835
Cluster 21: eye development
observed gene count: 22
expected gene count: 12.8128519377277
uncorrected p-value: 0.00980243430259271
GO ID	term	observed gene count	expected gene count	uncorrected p-value
GO:0001654	eye development	4	0.500828	0.00113761
GO:0001745	compound eye morphogenesis	10	3.46406	0.00233215
GO:0007423	sensory organ development	6	2.50414	0.038435
GO:0001752	compound eye photoreceptor fate commitment	2	0.375621	0.0515299
GO:0001751	compound eye photoreceptor cell differentiation	3	1.04339	0.0843145
GO:0048749	compound eye development	7	4.7996	0.204835
GO:0045165	cell fate commitment	1	0.918185	0.60881
GO:0042051	compound eye photoreceptor development	1	0.959921	0.625161
Cluster 22: regulation of protein ubiquitination
observed gene count: 2
expected gene count: 0.166942696257039
uncorrected p-value: 0.00986538817278097
GO ID	term	observed gene count	expected gene count	uncorrected p-value
GO:0031396	regulation of protein ubiquitination	2	0.166943	0.00986539
Cluster 23: ectoderm development
observed gene count: 11
expected gene count: 5.00828088771116
uncorrected p-value: 0.0116449854794715
GO ID	term	observed gene count	expected gene count	uncorrected p-value
GO:0007163	establishment or maintenance of cell polarity	4	1.33554	0.0428327
GO:0007398	ectoderm development	3	0.959921	0.0689611
GO:0001736	establishment of planar polarity	3	1.25207	0.128164
GO:0001738	morphogenesis of a polarized epithelium	2	0.667771	0.142085
GO:0042067	establishment of ommatidial polarity	2	1.21033	0.342753
GO:0035317	imaginal disc-derived wing hair organization	1	0.751242	0.535972
Cluster 24: carbohydrate biosynthetic process
observed gene count: 4
expected gene count: 0.918184829413713
uncorrected p-value: 0.012070363526217
GO ID	term	observed gene count	expected gene count	uncorrected p-value
GO:0009312	oligosaccharide biosynthetic process	3	0.542564	0.0151276
GO:0016051	carbohydrate biosynthetic process	1	0.208678	0.191995
Cluster 25: axis specification
observed gene count: 18
expected gene count: 10.767803908579
uncorrected p-value: 0.0232823608462244
GO ID	term	observed gene count	expected gene count	uncorrected p-value
GO:0009953	dorsal/ventral pattern formation	6	1.12686	0.000720696
GO:0009950	dorsal/ventral axis specification	6	1.25207	0.00129973
GO:0009952	anterior/posterior pattern formation	4	0.751242	0.00576116
GO:0000578	embryonic axis specification	2	0.208678	0.0159894
GO:0008103	oocyte microtubule cytoskeleton polarization	3	0.876449	0.0550277
GO:0007310	oocyte dorsal/ventral axis specification	3	0.876449	0.0550277
GO:0007350	blastoderm segmentation	3	0.918185	0.0618104
GO:0007314	oocyte anterior/posterior axis specification	3	1.00166	0.0764669
GO:0016325	oocyte microtubule cytoskeleton organization	2	0.584299	0.113689
GO:0007309	oocyte axis specification	2	0.626035	0.127699
GO:0008358	maternal determination of anterior/posterior axis, embryo	1	0.166943	0.156794
GO:0030951	establishment or maintenance of microtubule cytoskeleton polarity	1	0.250414	0.225729
GO:0009880	embryonic pattern specification	2	0.918185	0.233437
GO:0009948	anterior/posterior axis specification	1	0.29215	0.258056
GO:0009994	oocyte differentiation	1	0.333885	0.289036
GO:0009798	axis specification	1	0.333885	0.289036
GO:0007389	pattern specification process	1	0.876449	0.591748
GO:0008298	intracellular mRNA localization	1	0.959921	0.625161
Cluster 26: R7 cell differentiation
observed gene count: 10
expected gene count: 5.21695925803246
uncorrected p-value: 0.036349160811331
GO ID	term	observed gene count	expected gene count	uncorrected p-value
GO:0046843	dorsal appendage formation	6	1.41901	0.00255561
GO:0030707	ovarian follicle cell development	6	2.25373	0.0243884
GO:0045466	R7 cell differentiation	1	0.375621	0.318725
GO:0007304	chorion-containing eggshell formation	1	1.33554	0.744784
Cluster 27: aging
observed gene count: 11
expected gene count: 6.05167273931766
uncorrected p-value: 0.0404579204891597
GO ID	term	observed gene count	expected gene count	uncorrected p-value
GO:0010259	multicellular organismal aging	1	0.0417357	0.0417357
GO:0008340	determination of adult life span	10	6.00994	0.0792186
GO:0007568	aging	1	0.208678	0.191995
Cluster 28: muscle organ development
observed gene count: 7
expected gene count: 3.213646902948
uncorrected p-value: 0.0414062350229495
GO ID	term	observed gene count	expected gene count	uncorrected p-value
GO:0045610	regulation of hemocyte differentiation	3	0.542564	0.0151276
GO:0007517	muscle organ development	5	2.62935	0.122087
Cluster 29: dorsal closure
observed gene count: 8
expected gene count: 3.92315336204041
uncorrected p-value: 0.0425200958819648
GO ID	term	observed gene count	expected gene count	uncorrected p-value
GO:0007391	dorsal closure	8	3.71447	0.0322257
GO:0046328	regulation of JNK cascade	1	0.375621	0.318725
Cluster 30: SRP-dependent cotranslational protein targeting to membrane
observed gene count: 3
expected gene count: 0.834713481285194
uncorrected p-value: 0.0486245862846873
GO ID	term	observed gene count	expected gene count	uncorrected p-value
GO:0006614	SRP-dependent cotranslational protein targeting to membrane	3	0.459092	0.00928693
Cluster 31: cell-cell junction assembly
observed gene count: 2
expected gene count: 0.375621066578337
uncorrected p-value: 0.0515299457893095
GO ID	term	observed gene count	expected gene count	uncorrected p-value
GO:0007043	cell-cell junction assembly	2	0.250414	0.0233259
Cluster 32: muscle attachment
observed gene count: 12
expected gene count: 7.17853593905267
uncorrected p-value: 0.056733432469572
GO ID	term	observed gene count	expected gene count	uncorrected p-value
GO:0007424	open tracheal system development	9	4.42398	0.0330391
GO:0007475	apposition of dorsal and ventral imaginal disc-derived wing surfaces	3	0.751242	0.0369983
GO:0016203	muscle attachment	3	1.29381	0.137748
GO:0035239	tube morphogenesis	1	0.166943	0.156794
GO:0035152	regulation of tube architecture, open tracheal system	1	0.542564	0.425604
Cluster 33: locomotor rhythm
observed gene count: 6
expected gene count: 3.0049685326267
uncorrected p-value: 0.0796168774687689
GO ID	term	observed gene count	expected gene count	uncorrected p-value
GO:0042306	regulation of protein import into nucleus	3	0.250414	0.00131648
GO:0007623	circadian rhythm	5	1.37728	0.0112256
GO:0045475	locomotor rhythm	4	1.7529	0.0967952
GO:0007622	rhythmic behavior	2	0.542564	0.100114
Cluster 34: axonogenesis
observed gene count: 24
expected gene count: 18.0715468698244
uncorrected p-value: 0.0964062038456251
GO ID	term	observed gene count	expected gene count	uncorrected p-value
GO:0007409	axonogenesis	5	2.08678	0.0565102
GO:0048666	neuron development	3	1.71116	0.243912
GO:0000902	cell morphogenesis	3	1.96158	0.312624
GO:0048813	dendrite morphogenesis	7	5.50911	0.313331
GO:0048812	neuron projection morphogenesis	5	4.38225	0.447196
GO:0007411	axon guidance	6	6.46903	0.632137
Cluster 35: circadian rhythm
observed gene count: 9
expected gene count: 5.67605167273932
uncorrected p-value: 0.115640967189198
GO ID	term	observed gene count	expected gene count	uncorrected p-value
GO:0007623	circadian rhythm	5	1.37728	0.0112256
GO:0008355	olfactory learning	5	2.25373	0.073855
GO:0007611	learning or memory	3	1.62769	0.221545
GO:0042048	olfactory behavior	2	1.79463	0.540946
Cluster 36: female meiosis
observed gene count: 7
expected gene count: 4.17356740642597
uncorrected p-value: 0.12439260839674
GO ID	term	observed gene count	expected gene count	uncorrected p-value
GO:0016321	female meiosis chromosome segregation	4	1.29381	0.0387105
GO:0007059	chromosome segregation	2	1.37728	0.403208
GO:0007143	female meiosis	1	1.04339	0.655843
Cluster 37: cell fate determination
observed gene count: 4
expected gene count: 2.00331235508447
uncorrected p-value: 0.139267303024413
GO ID	term	observed gene count	expected gene count	uncorrected p-value
GO:0001709	cell fate determination	3	1.08513	0.0924895
GO:0007447	imaginal disc pattern formation	1	0.459092	0.374439
GO:0035222	wing disc pattern formation	1	0.584299	0.449598
Cluster 38: actin filament organization
observed gene count: 7
expected gene count: 4.42398145081153
uncorrected p-value: 0.154378517418826
GO ID	term	observed gene count	expected gene count	uncorrected p-value
GO:0007015	actin filament organization	4	2.87976	0.325152
GO:0030036	actin cytoskeleton organization	3	2.08678	0.347285
Cluster 39: exocytosis
observed gene count: 10
expected gene count: 7.09506459092415
uncorrected p-value: 0.173844656854328
GO ID	term	observed gene count	expected gene count	uncorrected p-value
GO:0007269	neurotransmitter secretion	8	3.83968	0.038172
GO:0048489	synaptic vesicle transport	1	0.459092	0.374439
GO:0006887	exocytosis	1	0.667771	0.494624
GO:0016079	synaptic vesicle exocytosis	1	0.876449	0.591748
GO:0007268	synaptic transmission	1	1.96158	0.865583
Cluster 40: regulation of neurogenesis
observed gene count: 3
expected gene count: 1.58595561444187
uncorrected p-value: 0.210522520555389
GO ID	term	observed gene count	expected gene count	uncorrected p-value
GO:0050773	regulation of dendrite development	1	0.208678	0.191995
GO:0050767	regulation of neurogenesis	1	0.333885	0.289036
GO:0048814	regulation of dendrite morphogenesis	1	0.709506	0.515739
Cluster 41: cation transport
observed gene count: 5
expected gene count: 3.54753229546207
uncorrected p-value: 0.281403844763344
GO ID	term	observed gene count	expected gene count	uncorrected p-value
GO:0030001	metal ion transport	2	0.417357	0.0626704
GO:0006812	cation transport	3	1.1686	0.109763
Cluster 42: hindgut morphogenesis
observed gene count: 2
expected gene count: 1.12686319973501
uncorrected p-value: 0.311770904596674
GO ID	term	observed gene count	expected gene count	uncorrected p-value
GO:0048546	digestive tract morphogenesis	1	0.0834713	0.0817321
GO:0007442	hindgut morphogenesis	1	0.792978	0.555362
Cluster 43: regulation of transcription, DNA-dependent
observed gene count: 17
expected gene count: 14.8161642928122
uncorrected p-value: 0.314488505912591
GO ID	term	observed gene count	expected gene count	uncorrected p-value
GO:0006355	regulation of transcription, DNA-dependent	17	14.7744	0.310426
Cluster 44: purine nucleotide biosynthetic process
observed gene count: 1
expected gene count: 0.375621066578337
uncorrected p-value: 0.318724520607942
GO ID	term	observed gene count	expected gene count	uncorrected p-value
GO:0006164	purine nucleotide biosynthetic process	1	0.166943	0.156794
Cluster 45: chitin-based cuticle development
observed gene count: 4
expected gene count: 2.96323285856244
uncorrected p-value: 0.344276791564435
GO ID	term	observed gene count	expected gene count	uncorrected p-value
GO:0008362	chitin-based embryonic cuticle biosynthetic process	2	0.709506	0.15679
GO:0040003	chitin-based cuticle development	2	1.96158	0.589554
Cluster 46: spindle organization
observed gene count: 17
expected gene count: 15.1500496853263
uncorrected p-value: 0.347482226048164
GO ID	term	observed gene count	expected gene count	uncorrected p-value
GO:0007017	microtubule-based process	5	1.96158	0.0452214
GO:0007010	cytoskeleton organization	4	1.79463	0.103394
GO:0000022	mitotic spindle elongation	6	3.29712	0.111831
GO:0000226	microtubule cytoskeleton organization	3	1.29381	0.137748
GO:0007051	spindle organization	1	0.459092	0.374439
GO:0007052	mitotic spindle organization	6	7.84631	0.801852
Cluster 47: response to ecdysone
observed gene count: 1
expected gene count: 0.500828088771116
uncorrected p-value: 0.400566373005442
GO ID	term	observed gene count	expected gene count	uncorrected p-value
GO:0035075	response to ecdysone	1	0.500828	0.400566
Cluster 48: regulation of alternative nuclear mRNA splicing, via spliceosome
observed gene count: 3
expected gene count: 2.46240476979132
uncorrected p-value: 0.449263744879017
GO ID	term	observed gene count	expected gene count	uncorrected p-value
GO:0000381	regulation of alternative nuclear mRNA splicing, via spliceosome	3	2.12852	0.358812
Cluster 49: locomotory behavior
observed gene count: 1
expected gene count: 0.667770785028155
uncorrected p-value: 0.494623949555822
GO ID	term	observed gene count	expected gene count	uncorrected p-value
GO:0007626	locomotory behavior	1	0.542564	0.425604
Cluster 50: negative regulation of gene expression
observed gene count: 14
expected gene count: 13.8979794633985
uncorrected p-value: 0.527791928165607
GO ID	term	observed gene count	expected gene count	uncorrected p-value
GO:0000122	negative regulation of transcription from RNA polymerase II promoter	8	5.84299	0.230589
GO:0006357	regulation of transcription from RNA polymerase II promoter	6	5.25869	0.430441
GO:0045892	negative regulation of transcription, DNA-dependent	4	3.42233	0.448701
GO:0010629	negative regulation of gene expression	2	2.42067	0.70311
Cluster 51: flight behavior
observed gene count: 2
expected gene count: 2.12851937727724
uncorrected p-value: 0.634229704851516
GO ID	term	observed gene count	expected gene count	uncorrected p-value
GO:0007629	flight behavior	2	0.918185	0.233437
Cluster 52: proteolysis
observed gene count: 24
expected gene count: 25.9178535939053
uncorrected p-value: 0.682026866890231
GO ID	term	observed gene count	expected gene count	uncorrected p-value
GO:0006511	ubiquitin-dependent protein catabolic process	8	3.29712	0.0170213
GO:0030163	protein catabolic process	3	0.876449	0.0550277
GO:0006508	proteolysis	15	22.7877	0.970835
Cluster 53: transcription, DNA-dependent
observed gene count: 3
expected gene count: 3.67273931765485
uncorrected p-value: 0.71685451179267
GO ID	term	observed gene count	expected gene count	uncorrected p-value
GO:0006366	transcription from RNA polymerase II promoter	2	2.00331	0.601092
GO:0006351	transcription, DNA-dependent	1	1.87811	0.853581
Cluster 54: mRNA metabolic process
observed gene count: 1
expected gene count: 1.46074859224909
uncorrected p-value: 0.775488037618832
GO ID	term	observed gene count	expected gene count	uncorrected p-value
GO:0016071	mRNA metabolic process	1	0.0417357	0.0417357
Cluster 55: regulation of cell size
observed gene count: 1
expected gene count: 1.50248426631335
uncorrected p-value: 0.784879972300116
GO ID	term	observed gene count	expected gene count	uncorrected p-value
GO:0008361	regulation of cell size	1	0.626035	0.47259
GO:0045793	positive regulation of cell size	1	0.876449	0.591748
Cluster 56: mitosis
observed gene count: 3
expected gene count: 4.34051010268301
uncorrected p-value: 0.814737643876305
GO ID	term	observed gene count	expected gene count	uncorrected p-value
GO:0007067	mitosis	3	4.00662	0.770014
Cluster 57: negative regulation of gene expression
observed gene count: 2
expected gene count: 3.38058959920503
uncorrected p-value: 0.857438021715057
GO ID	term	observed gene count	expected gene count	uncorrected p-value
GO:0010629	negative regulation of gene expression	2	2.42067	0.70311

## Sheet: DigestiveSystemL3
sample name: DigestiveSystemL3
number of associated genes in the sample: 827
Cluster 1: chitin metabolic process
observed gene count: 42
expected gene count: 4.98555813183173
uncorrected p-value: 4.72981088340547e-29
GO ID	term	observed gene count	expected gene count	uncorrected p-value
GO:0006030	chitin metabolic process	42	4.98556	4.72981e-29
Cluster 2: protein catabolic process
observed gene count: 23
expected gene count: 5.69778072209341
uncorrected p-value: 7.19447985298944e-09
GO ID	term	observed gene count	expected gene count	uncorrected p-value
GO:0030163	protein catabolic process	8	1.15051	8.42901e-06
GO:0006511	ubiquitin-dependent protein catabolic process	15	4.32812	2.12679e-05
GO:0051603	proteolysis involved in cellular protein catabolic process	3	0.438291	0.00745498
Cluster 3: metamorphosis
observed gene count: 24
expected gene count: 10.518979794634
uncorrected p-value: 0.000134838789905525
GO ID	term	observed gene count	expected gene count	uncorrected p-value
GO:0048102	autophagic cell death	12	3.12282	4.8666e-05
GO:0035071	salivary gland cell autophagic cell death	12	3.6159	0.000215263
GO:0012501	programmed cell death	4	0.821795	0.00751285
GO:0009791	post-embryonic development	1	0.109573	0.106575
GO:0007552	metamorphosis	3	1.97231	0.315515
GO:0035070	salivary gland histolysis	1	0.438291	0.362921
GO:0007431	salivary gland development	2	1.36966	0.401342
GO:0007435	salivary gland morphogenesis	3	2.73932	0.521295
Cluster 4: protein transport
observed gene count: 21
expected gene count: 10.8476979132163
uncorrected p-value: 0.0028585960051757
GO ID	term	observed gene count	expected gene count	uncorrected p-value
GO:0015031	protein transport	9	3.67069	0.010494
GO:0006886	intracellular protein transport	9	4.10898	0.0209757
GO:0008104	protein localization	3	2.46539	0.450812
Cluster 5: cellular acyl-CoA homeostasis
observed gene count: 3
expected gene count: 0.493077177873468
uncorrected p-value: 0.0107310807821622
GO ID	term	observed gene count	expected gene count	uncorrected p-value
GO:0042049	cellular acyl-CoA homeostasis	3	0.383504	0.00485595
Cluster 6: pupariation
observed gene count: 4
expected gene count: 1.15051341503809
uncorrected p-value: 0.0253893958349794
GO ID	term	observed gene count	expected gene count	uncorrected p-value
GO:0035073	pupariation	4	0.547864	0.0014396
GO:0035075	response to ecdysone	3	0.657436	0.024856
Cluster 7: immune response
observed gene count: 19
expected gene count: 12.2721430937396
uncorrected p-value: 0.0390684403999853
GO ID	term	observed gene count	expected gene count	uncorrected p-value
GO:0016998	cell wall macromolecule catabolic process	6	0.712223	3.26837e-05
GO:0019730	antimicrobial humoral response	8	2.24624	0.00149354
GO:0006955	immune response	7	2.73932	0.0184622
GO:0006952	defense response	10	5.53342	0.049815
Cluster 8: innate immune response
observed gene count: 7
expected gene count: 3.61589930440543
uncorrected p-value: 0.0685515357604451
GO ID	term	observed gene count	expected gene count	uncorrected p-value
GO:0009253	peptidoglycan catabolic process	3	0.767009	0.0379157
GO:0006032	chitin catabolic process	3	0.876582	0.0538072
GO:0000270	peptidoglycan metabolic process	1	0.0547864	0.0547864
GO:0045087	innate immune response	3	2.13667	0.361274
Cluster 9: maintenance of protein location in cell
observed gene count: 2
expected gene count: 0.493077177873468
uncorrected p-value: 0.0835473367749543
GO ID	term	observed gene count	expected gene count	uncorrected p-value
GO:0032507	maintenance of protein location in cell	2	0.273932	0.0268358
Cluster 10: metal ion transport
observed gene count: 2
expected gene count: 0.54786353097052
uncorrected p-value: 0.100755884877719
GO ID	term	observed gene count	expected gene count	uncorrected p-value
GO:0030001	metal ion transport	2	0.547864	0.100756
Cluster 11: bristle development
observed gene count: 12
expected gene count: 8.1083802583637
uncorrected p-value: 0.112678014589222
GO ID	term	observed gene count	expected gene count	uncorrected p-value
GO:0007398	ectoderm development	3	1.26009	0.128821
GO:0008544	epidermis development	2	0.767009	0.176857
GO:0022416	bristle development	5	3.12282	0.201045
GO:0009913	epidermal cell differentiation	1	0.328718	0.286893
GO:0007423	sensory organ development	3	3.28718	0.645825
Cluster 12: ectoderm development
observed gene count: 24
expected gene count: 18.7369327591918
uncorrected p-value: 0.127738075189254
GO ID	term	observed gene count	expected gene count	uncorrected p-value
GO:0035220	wing disc development	9	3.88983	0.015073
GO:0007398	ectoderm development	3	1.26009	0.128821
GO:0008544	epidermis development	2	0.767009	0.176857
GO:0007560	imaginal disc morphogenesis	1	0.328718	0.286893
GO:0007472	wing disc morphogenesis	1	0.931368	0.616485
GO:0007476	imaginal disc-derived wing morphogenesis	10	10.7929	0.643626
Cluster 13: exocytosis
observed gene count: 16
expected gene count: 11.7790659158662
uncorrected p-value: 0.132199468616069
GO ID	term	observed gene count	expected gene count	uncorrected p-value
GO:0007269	neurotransmitter secretion	10	5.04034	0.0288125
GO:0016081	synaptic vesicle docking during exocytosis	4	1.26009	0.0344683
GO:0048488	synaptic vesicle endocytosis	4	1.64359	0.0791955
GO:0006836	neurotransmitter transport	3	1.31487	0.141563
GO:0007267	cell-cell signaling	1	0.383504	0.325977
GO:0048489	synaptic vesicle transport	1	0.60265	0.462055
GO:0016192	vesicle-mediated transport	5	4.71163	0.5116
GO:0006887	exocytosis	1	0.876582	0.59423
GO:0016079	synaptic vesicle exocytosis	1	1.15051	0.693959
GO:0007268	synaptic transmission	1	2.57496	0.929514
Cluster 14: protein ubiquitination
observed gene count: 4
expected gene count: 2.02709506459092
uncorrected p-value: 0.142435201893205
GO ID	term	observed gene count	expected gene count	uncorrected p-value
GO:0016567	protein ubiquitination	4	2.0271	0.142435
Cluster 15: phospholipid metabolic process
observed gene count: 2
expected gene count: 0.712222590261676
uncorrected p-value: 0.157007825363707
GO ID	term	observed gene count	expected gene count	uncorrected p-value
GO:0006650	glycerophospholipid metabolic process	1	0.164359	0.155529
GO:0006644	phospholipid metabolic process	1	0.547864	0.430853
Cluster 16: apoptosis
observed gene count: 11
expected gene count: 7.88923484597549
uncorrected p-value: 0.166457147283303
GO ID	term	observed gene count	expected gene count	uncorrected p-value
GO:0006915	apoptosis	6	2.4106	0.0317175
GO:0043065	positive regulation of apoptosis	2	0.493077	0.0835473
GO:0043069	negative regulation of programmed cell death	1	0.383504	0.325977
GO:0043066	negative regulation of apoptosis	3	2.84889	0.548078
GO:0042981	regulation of apoptosis	1	1.09573	0.676196
Cluster 17: dsRNA transport
observed gene count: 3
expected gene count: 1.64359059291156
uncorrected p-value: 0.225113467163768
GO ID	term	observed gene count	expected gene count	uncorrected p-value
GO:0033227	dsRNA transport	3	1.31487	0.141563
Cluster 18: endocytosis
observed gene count: 21
expected gene count: 17.6959920503478
uncorrected p-value: 0.23837373047502
GO ID	term	observed gene count	expected gene count	uncorrected p-value
GO:0016044	membrane organization	2	0.712223	0.157008
GO:0006897	endocytosis	4	2.30103	0.19652
GO:0016192	vesicle-mediated transport	5	4.71163	0.5116
GO:0006911	phagocytosis, engulfment	10	9.80676	0.521161
GO:0006909	phagocytosis	1	0.986154	0.63752
Cluster 19: epithelial cell migration, open tracheal system
observed gene count: 3
expected gene count: 1.69837694600861
uncorrected p-value: 0.239892406396503
GO ID	term	observed gene count	expected gene count	uncorrected p-value
GO:0007427	epithelial cell migration, open tracheal system	3	1.69838	0.239892
Cluster 20: gastrulation
observed gene count: 3
expected gene count: 1.69837694600861
uncorrected p-value: 0.239892406396503
GO ID	term	observed gene count	expected gene count	uncorrected p-value
GO:0007369	gastrulation	2	1.36966	0.401342
GO:0010004	gastrulation involving germ band extension	1	0.60265	0.462055
Cluster 21: protein amino acid glycosylation
observed gene count: 3
expected gene count: 1.91752235839682
uncorrected p-value: 0.300256383703898
GO ID	term	observed gene count	expected gene count	uncorrected p-value
GO:0006486	protein amino acid glycosylation	3	1.75316	0.254826
Cluster 22: gut development
observed gene count: 10
expected gene count: 8.27273931765485
uncorrected p-value: 0.314534392643175
GO ID	term	observed gene count	expected gene count	uncorrected p-value
GO:0007439	ectodermal gut development	1	0.0547864	0.0547864
GO:0048565	gut development	1	0.164359	0.155529
GO:0007442	hindgut morphogenesis	2	1.04094	0.279632
GO:0006357	regulation of transcription from RNA polymerase II promoter	8	6.90308	0.386297
Cluster 23: olfactory behavior
observed gene count: 3
expected gene count: 2.68453130175555
uncorrected p-value: 0.507582689212541
GO ID	term	observed gene count	expected gene count	uncorrected p-value
GO:0042048	olfactory behavior	3	2.35581	0.421434
Cluster 24: heart development
observed gene count: 4
expected gene count: 3.88983106989069
uncorrected p-value: 0.550161319962588
GO ID	term	observed gene count	expected gene count	uncorrected p-value
GO:0035050	embryonic heart tube development	2	0.931368	0.238163
GO:0007507	heart development	2	3.17761	0.83443
Cluster 25: innate immune response
observed gene count: 3
expected gene count: 2.90367671414376
uncorrected p-value: 0.561135125317048
GO ID	term	observed gene count	expected gene count	uncorrected p-value
GO:0045087	innate immune response	3	2.13667	0.361274
Cluster 26: somatic stem cell division
observed gene count: 1
expected gene count: 0.82179529645578
uncorrected p-value: 0.570686509761051
GO ID	term	observed gene count	expected gene count	uncorrected p-value
GO:0048103	somatic stem cell division	1	0.493077	0.397843
Cluster 27: dorsal closure
observed gene count: 14
expected gene count: 14.6827426300099
uncorrected p-value: 0.61206351829674
GO ID	term	observed gene count	expected gene count	uncorrected p-value
GO:0007424	open tracheal system development	9	5.80735	0.126748
GO:0016331	morphogenesis of embryonic epithelium	1	0.438291	0.362921
GO:0008258	head involution	3	2.24624	0.391543
GO:0007391	dorsal closure	5	4.87599	0.542376
Cluster 28: cytokinesis
observed gene count: 14
expected gene count: 14.792315336204
uncorrected p-value: 0.623225119194171
GO ID	term	observed gene count	expected gene count	uncorrected p-value
GO:0007349	cellularization	4	2.19145	0.174155
GO:0007286	spermatid development	4	2.24624	0.185227
GO:0007291	sperm individualization	4	2.4106	0.2197
GO:0048515	spermatid differentiation	1	0.438291	0.362921
GO:0007281	germ cell development	2	1.64359	0.494986
GO:0000910	cytokinesis	3	3.56111	0.69882
GO:0007283	spermatogenesis	4	5.2047	0.771414
Cluster 29: ion transport
observed gene count: 7
expected gene count: 7.50573037429612
uncorrected p-value: 0.629370892230538
GO ID	term	observed gene count	expected gene count	uncorrected p-value
GO:0030001	metal ion transport	2	0.547864	0.100756
GO:0006812	cation transport	2	1.53402	0.458617
GO:0006814	sodium ion transport	2	2.84889	0.786159
GO:0006811	ion transport	1	2.62974	0.933388
Cluster 30: actin filament-based process
observed gene count: 3
expected gene count: 3.28718118582312
uncorrected p-value: 0.645824876889854
GO ID	term	observed gene count	expected gene count	uncorrected p-value
GO:0032970	regulation of actin filament-based process	1	0.109573	0.106575
GO:0030029	actin filament-based process	1	0.328718	0.286893
GO:0032956	regulation of actin cytoskeleton organization	1	0.383504	0.325977
GO:0030036	actin cytoskeleton organization	2	2.73932	0.767504
Cluster 31: pattern specification process
observed gene count: 6
expected gene count: 6.8482941371315
uncorrected p-value: 0.687464264565596
GO ID	term	observed gene count	expected gene count	uncorrected p-value
GO:0007389	pattern specification process	4	1.15051	0.0253894
GO:0009880	embryonic pattern specification	2	1.2053	0.341365
GO:0008595	determination of anterior/posterior axis, embryo	1	2.0271	0.875979
Cluster 32: imaginal disc pattern formation
observed gene count: 1
expected gene count: 1.31487247432925
uncorrected p-value: 0.741620027408646
GO ID	term	observed gene count	expected gene count	uncorrected p-value
GO:0007447	imaginal disc pattern formation	1	0.60265	0.462055
Cluster 33: regulation of phosphorylation
observed gene count: 1
expected gene count: 1.3696588274263
uncorrected p-value: 0.755798266233744
GO ID	term	observed gene count	expected gene count	uncorrected p-value
GO:0042325	regulation of phosphorylation	1	0.438291	0.362921
Cluster 34: axonogenesis
observed gene count: 15
expected gene count: 17.9699238158331
uncorrected p-value: 0.800168667481237
GO ID	term	observed gene count	expected gene count	uncorrected p-value
GO:0000902	cell morphogenesis	4	2.57496	0.255697
GO:0007409	axonogenesis	4	2.73932	0.292762
GO:0048813	dendrite morphogenesis	7	7.2318	0.589996
GO:0048666	neuron development	1	2.24624	0.901063
GO:0048812	neuron projection morphogenesis	2	5.75257	0.98118
Cluster 35: determination of adult life span
observed gene count: 6
expected gene count: 7.94402119907254
uncorrected p-value: 0.812612187583062
GO ID	term	observed gene count	expected gene count	uncorrected p-value
GO:0008340	determination of adult life span	6	7.88923	0.807443
Cluster 36: cell proliferation
observed gene count: 18
expected gene count: 22.7911228883736
uncorrected p-value: 0.878837782804746
GO ID	term	observed gene count	expected gene count	uncorrected p-value
GO:0008283	cell proliferation	10	3.9994	0.00624843
GO:0007010	cytoskeleton organization	5	2.35581	0.0844263
GO:0000022	mitotic spindle elongation	7	4.32812	0.141279
GO:0007051	spindle organization	1	0.60265	0.462055
GO:0007052	mitotic spindle organization	8	10.2998	0.814858
GO:0007017	microtubule-based process	1	2.57496	0.929514
Cluster 37: regulation of transcription, DNA-dependent
observed gene count: 15
expected gene count: 19.4491553494535
uncorrected p-value: 0.881764485376984
GO ID	term	observed gene count	expected gene count	uncorrected p-value
GO:0006355	regulation of transcription, DNA-dependent	15	19.3944	0.879303
Cluster 38: meiosis
observed gene count: 5
expected gene count: 7.99880755216959
uncorrected p-value: 0.907716691858705
GO ID	term	observed gene count	expected gene count	uncorrected p-value
GO:0007059	chromosome segregation	3	1.80795	0.269885
GO:0007126	meiosis	1	1.15051	0.693959
GO:0007067	mitosis	3	5.25949	0.902774
Cluster 39: oogenesis
observed gene count: 22
expected gene count: 29.8037760847963
uncorrected p-value: 0.949682455343073
GO ID	term	observed gene count	expected gene count	uncorrected p-value
GO:0016477	cell migration	4	1.26009	0.0344683
GO:0007297	ovarian follicle cell migration	2	0.60265	0.118831
GO:0007298	border follicle cell migration	8	5.09513	0.136953
GO:0030707	ovarian follicle cell development	2	2.95846	0.803485
GO:0032504	multicellular organism reproduction	6	11.9434	0.981992
GO:0048477	oogenesis	5	10.9025	0.986322
Cluster 40: eye morphogenesis
observed gene count: 9
expected gene count: 14.6279562769129
uncorrected p-value: 0.960115070672344
GO ID	term	observed gene count	expected gene count	uncorrected p-value
GO:0007398	ectoderm development	3	1.26009	0.128821
GO:0048592	eye morphogenesis	1	0.438291	0.362921
GO:0007423	sensory organ development	3	3.28718	0.645825
GO:0048749	compound eye development	4	6.30043	0.881613
GO:0001745	compound eye morphogenesis	2	4.54727	0.946346
Cluster 41: phosphorylation
observed gene count: 8
expected gene count: 14.1896654521365
uncorrected p-value: 0.97550670511364
GO ID	term	observed gene count	expected gene count	uncorrected p-value
GO:0016310	phosphorylation	1	1.42445	0.769199
GO:0006468	protein amino acid phosphorylation	7	12.7652	0.974303
Cluster 42: negative regulation of gene expression
observed gene count: 11
expected gene count: 18.2986419344154
uncorrected p-value: 0.977871008468034
GO ID	term	observed gene count	expected gene count	uncorrected p-value
GO:0006357	regulation of transcription from RNA polymerase II promoter	8	6.90308	0.386297
GO:0000122	negative regulation of transcription from RNA polymerase II promoter	4	7.67009	0.952346
GO:0010629	negative regulation of gene expression	1	3.17761	0.962158
GO:0045892	negative regulation of transcription, DNA-dependent	1	4.49248	0.990275

[truncated: 38 more sheets: DigestiveSystemMedMaleFemale+1d, DigestiveSystemMedMaleFemale+4d, DigestiveSystemMdMaleFemale+20d, ImaginalDiscsL3, CNSL3, CNSPrepupae+2d, HeadsVirginFemale+1d, HeadsVirginFemale+4d, HeadsVirginFemale+20d, HeadsMatedFemale+1d, HeadsMatedFemale+4d, HeadsMatedFemale+20d, HeadsMatedMale+1d, HeadsMatedMale+4d, HeadsMatedMale+20d, OvariesMatedFemale+4d, OvariesVirginFemale+4d, TestesMatedMale+4d, AccessoryGlandsMatedMale+4d, (Embryo) 1182-4H …]
