# Supplementary material for: Comparison of D. melanogaster and C. elegans developmental stages, tissues, and cells by modENCODE RNA-seq data
Source: HighWire-hosted journal article supplement (doi:10.1101/gr.170100.113), 2014-07-01
Supplement: Supplemental_Files.zip [file TableS5C GO terms enriched in common associated genes in the mapping of fly cell lines.xlsx]

## Sheet: fly cell line mapping
GO ID	Term
GO:0006378	mRNA polyadenylation
GO:0006379	mRNA cleavage
GO:0006471	protein ADP-ribosylation
GO:0006616	SRP-dependent cotranslational protein targeting to membrane, translocation
GO:0006621	protein retention in ER lumen
GO:0006909	phagocytosis
GO:0006915	apoptotic process
GO:0006955	immune response
GO:0006963	positive regulation of antibacterial peptide biosynthetic process
GO:0006964	positive regulation of biosynthetic process of antibacterial peptides active against Gram-negative bacteria
GO:0007010	cytoskeleton organization
GO:0007026	negative regulation of microtubule depolymerization
GO:0007029	endoplasmic reticulum organization
GO:0007064	mitotic sister chromatid cohesion
GO:0007155	cell adhesion
GO:0007173	epidermal growth factor receptor signaling pathway
GO:0007179	transforming growth factor beta receptor signaling pathway
GO:0007225	patched ligand maturation
GO:0007254	JNK cascade
GO:0007298	border follicle cell migration
GO:0007314	oocyte anterior/posterior axis specification
GO:0007391	dorsal closure
GO:0007411	axon guidance
GO:0007464	R3/R4 cell fate commitment
GO:0008285	negative regulation of cell proliferation
GO:0008340	determination of adult lifespan
GO:0008360	regulation of cell shape
GO:0008361	regulation of cell size
GO:0015785	UDP-galactose transport
GO:0016246	RNA interference
GO:0018009	N-terminal peptidyl-L-cysteine N-palmitoylation
GO:0030307	positive regulation of cell growth
GO:0030422	production of siRNA involved in RNA interference
GO:0030514	negative regulation of BMP signaling pathway
GO:0030722	establishment of oocyte nucleus localization involved in oocyte dorsal/ventral axis specification
GO:0034334	adherens junction maintenance
GO:0035103	sterol regulatory element binding protein cleavage
GO:0035332	positive regulation of hippo signaling cascade
GO:0040008	regulation of growth
GO:0043066	negative regulation of apoptotic process
GO:0045500	sevenless signaling pathway
GO:0045571	negative regulation of imaginal disc growth
GO:0045793	positive regulation of cell size
GO:0046621	negative regulation of organ growth
GO:0046622	positive regulation of organ growth
GO:0046627	negative regulation of insulin receptor signaling pathway
GO:0046673	negative regulation of compound eye retinal cell programmed cell death
GO:0046907	intracellular transport
GO:0050829	defense response to Gram-negative bacterium
GO:0051491	positive regulation of filopodium assembly
GO:0051607	defense response to virus
GO:0061057	peptidoglycan recognition protein signaling pathway
GO:0090099	negative regulation of decapentaplegic signaling pathway

## Sheet: fly cell lines vs embryos
GO ID	Term
GO:0001736	establishment of planar polarity
GO:0001737	establishment of imaginal disc-derived wing hair orientation
GO:0001944	vasculature development
GO:0006471	protein ADP-ribosylation
GO:0006614	SRP-dependent cotranslational protein targeting to membrane
GO:0006616	SRP-dependent cotranslational protein targeting to membrane, translocation
GO:0006621	protein retention in ER lumen
GO:0006890	retrograde vesicle-mediated transport, Golgi to ER
GO:0007016	cytoskeletal anchoring at plasma membrane
GO:0007026	negative regulation of microtubule depolymerization
GO:0007064	mitotic sister chromatid cohesion
GO:0007155	cell adhesion
GO:0007156	homophilic cell adhesion
GO:0007163	establishment or maintenance of cell polarity
GO:0007164	establishment of tissue polarity
GO:0007173	epidermal growth factor receptor signaling pathway
GO:0007254	JNK cascade
GO:0007385	specification of segmental identity, abdomen
GO:0007390	germ-band shortening
GO:0007391	dorsal closure
GO:0007409	axonogenesis
GO:0007411	axon guidance
GO:0007417	central nervous system development
GO:0007422	peripheral nervous system development
GO:0007424	open tracheal system development
GO:0007432	salivary gland boundary specification
GO:0007435	salivary gland morphogenesis
GO:0007476	imaginal disc-derived wing morphogenesis
GO:0007498	mesoderm development
GO:0007507	heart development
GO:0007509	mesoderm migration involved in gastrulation
GO:0007520	myoblast fusion
GO:0007525	somatic muscle development
GO:0008045	motor neuron axon guidance
GO:0008078	mesodermal cell migration
GO:0008104	protein localization
GO:0008283	cell proliferation
GO:0008286	insulin receptor signaling pathway
GO:0008347	glial cell migration
GO:0008360	regulation of cell shape
GO:0008361	regulation of cell size
GO:0008543	fibroblast growth factor receptor signaling pathway
GO:0008585	female gonad development
GO:0008586	imaginal disc-derived wing vein morphogenesis
GO:0009887	organ morphogenesis
GO:0010507	negative regulation of autophagy
GO:0016055	Wnt receptor signaling pathway
GO:0016201	synaptic target inhibition
GO:0016203	muscle attachment
GO:0016556	mRNA modification
GO:0019991	septate junction assembly
GO:0030036	actin cytoskeleton organization
GO:0030178	negative regulation of Wnt receptor signaling pathway
GO:0030334	regulation of cell migration
GO:0031290	retinal ganglion cell axon guidance
GO:0032874	positive regulation of stress-activated MAPK cascade
GO:0035011	melanotic encapsulation of foreign target
GO:0035099	hemocyte migration
GO:0035151	regulation of tube size, open tracheal system
GO:0035159	regulation of tube length, open tracheal system
GO:0035292	specification of segmental identity, trunk
GO:0035293	chitin-based larval cuticle pattern formation
GO:0035317	imaginal disc-derived wing hair organization
GO:0035329	hippo signaling cascade
GO:0035331	negative regulation of hippo signaling cascade
GO:0038007	netrin-activated signaling pathway
GO:0040014	regulation of multicellular organism growth
GO:0040018	positive regulation of multicellular organism growth
GO:0042059	negative regulation of epidermal growth factor receptor signaling pathway
GO:0042067	establishment of ommatidial planar polarity
GO:0042384	cilium assembly
GO:0045175	basal protein localization
GO:0045216	cell-cell junction organization
GO:0045571	negative regulation of imaginal disc growth
GO:0045705	negative regulation of salivary gland boundary specification
GO:0045746	negative regulation of Notch signaling pathway
GO:0045793	positive regulation of cell size
GO:0046330	positive regulation of JNK cascade
GO:0046620	regulation of organ growth
GO:0046621	negative regulation of organ growth
GO:0046622	positive regulation of organ growth
GO:0046665	amnioserosa maintenance
GO:0048598	embryonic morphogenesis
GO:0048675	axon extension
GO:0060857	establishment of glial blood-brain barrier
GO:0070983	dendrite guidance

## Sheet: fly cell lines vs female adults
GO ID	Term
GO:0000002	mitochondrial genome maintenance
GO:0000075	cell cycle checkpoint
GO:0000077	DNA damage checkpoint
GO:0000723	telomere maintenance
GO:0006044	N-acetylglucosamine metabolic process
GO:0006260	DNA replication
GO:0006281	DNA repair
GO:0006289	nucleotide-excision repair
GO:0006298	mismatch repair
GO:0006303	double-strand break repair via nonhomologous end joining
GO:0006310	DNA recombination
GO:0006415	translational termination
GO:0006420	arginyl-tRNA aminoacylation
GO:0006426	glycyl-tRNA aminoacylation
GO:0006457	protein folding
GO:0006606	protein import into nucleus
GO:0006694	steroid biosynthetic process
GO:0006915	apoptotic process
GO:0007052	mitotic spindle organization
GO:0007131	reciprocal meiotic recombination
GO:0007225	patched ligand maturation
GO:0007257	activation of JUN kinase activity
GO:0008063	Toll signaling pathway
GO:0008298	intracellular mRNA localization
GO:0008535	respiratory chain complex IV assembly
GO:0008630	intrinsic apoptotic signaling pathway in response to DNA damage
GO:0009314	response to radiation
GO:0009950	dorsal/ventral axis specification
GO:0010212	response to ionizing radiation
GO:0010526	negative regulation of transposition, RNA-mediated
GO:0010529	negative regulation of transposition
GO:0015012	heparan sulfate proteoglycan biosynthetic process
GO:0015785	UDP-galactose transport
GO:0016579	protein deubiquitination
GO:0018009	N-terminal peptidyl-L-cysteine N-palmitoylation
GO:0019100	male germ-line sex determination
GO:0019731	antibacterial humoral response
GO:0019919	peptidyl-arginine methylation, to asymmetrical-dimethyl arginine
GO:0022008	neurogenesis
GO:0030717	karyosome formation
GO:0031023	microtubule organizing center organization
GO:0031122	cytoplasmic microtubule organization
GO:0031623	receptor internalization
GO:0042771	intrinsic apoptotic signaling pathway in response to DNA damage by p53 class mediator
GO:0045187	regulation of circadian sleep/wake cycle, sleep
GO:0046843	dorsal appendage formation
GO:0048072	compound eye pigmentation
GO:0050829	defense response to Gram-negative bacterium
GO:0060213	positive regulation of nuclear-transcribed mRNA poly(A) tail shortening
