# Supplementary material for: Comparison of D. melanogaster and C. elegans developmental stages, tissues, and cells by modENCODE RNA-seq data
Source: HighWire-hosted journal article supplement (doi:10.1101/gr.170100.113), 2014-07-01
Supplement: Supplemental_Files.zip [file TableS6A WormStageAllClusters.xls]

## Sheet: EE_50-0
sample name: EE_50-0
number of associated genes in the sample: 1753
Cluster 1: growth
observed gene count: 321
expected gene count: 73.5890881513205
uncorrected p-value: 1.78554279595605e-116
GO ID	term	observed gene count	expected gene count	uncorrected p-value
GO:0002119	nematode larval development	319	71.9077	8.31568e-118
GO:0040007	growth	262	59.4343	4.18614e-95
GO:0009791	post-embryonic development	3	0.625625	0.0228231
Cluster 2: regulation of growth rate
observed gene count: 222
expected gene count: 59.1215203426124
uncorrected p-value: 9.825169180907e-67
GO ID	term	observed gene count	expected gene count	uncorrected p-value
GO:0040010	positive regulation of growth rate	219	59.0042	6.9668e-65
GO:0040009	regulation of growth rate	2	0.0782031	0.00152809
GO:0045927	positive regulation of growth	1	0.0391015	0.0391015
Cluster 3: sex differentiation
observed gene count: 142
expected gene count: 28.5050187366167
uncorrected p-value: 9.41839041655804e-58
GO ID	term	observed gene count	expected gene count	uncorrected p-value
GO:0040035	hermaphrodite genitalia development	141	28.114	9.97446e-58
GO:0007548	sex differentiation	1	0.430117	0.355191
Cluster 4: aging
observed gene count: 142
expected gene count: 31.7895476445396
uncorrected p-value: 1.13904566787982e-51
GO ID	term	observed gene count	expected gene count	uncorrected p-value
GO:0008340	determination of adult life span	142	31.7504	9.75491e-52
GO:0007568	aging	1	0.0782031	0.076675
Cluster 5: apoptosis
observed gene count: 105
expected gene count: 18.6905335474661
uncorrected p-value: 5.58268503431607e-48
GO ID	term	observed gene count	expected gene count	uncorrected p-value
GO:0006915	apoptosis	98	16.4617	3.19551e-47
GO:0012501	programmed cell death	4	0.547421	0.00170182
GO:0008219	cell death	6	2.11148	0.0184732
Cluster 6: oogenesis (oogenesis / reproductive behavior)
observed gene count: 101
expected gene count: 22.8352962169879
uncorrected p-value: 1.50357010632809e-36
GO ID	term	observed gene count	expected gene count	uncorrected p-value
GO:0048477	oogenesis	46	7.35109	8.06816e-24
GO:0007276	gamete generation	20	3.32363	7.744e-11
GO:0018991	oviposition	36	12.4734	1.51419e-08
GO:0032504	multicellular organism reproduction	5	0.273711	1.787e-06
GO:0048609	reproductive process in a multicellular organism	1	0.195508	0.180812
Cluster 7: meiosis
observed gene count: 59
expected gene count: 7.85940845824411
uncorrected p-value: 6.52869896766529e-35
GO ID	term	observed gene count	expected gene count	uncorrected p-value
GO:0007126	meiosis	39	4.65308	1.50966e-25
GO:0045132	meiotic chromosome segregation	38	4.53578	6.38574e-25
GO:0007059	chromosome segregation	4	0.547421	0.00170182
GO:0007049	cell cycle	4	0.625625	0.00290677
GO:0051321	meiotic cell cycle	1	0.0391015	0.0391015
Cluster 8: epithelium development
observed gene count: 72
expected gene count: 14.5457708779443
uncorrected p-value: 1.54384944773917e-29
GO ID	term	observed gene count	expected gene count	uncorrected p-value
GO:0002009	morphogenesis of an epithelium	71	14.4676	6.65214e-29
GO:0060429	epithelium development	1	0.0391015	0.0391015
Cluster 9: oocyte maturation
observed gene count: 35
expected gene count: 5.63062098501071
uncorrected p-value: 2.27511291594739e-18
GO ID	term	observed gene count	expected gene count	uncorrected p-value
GO:0007281	germ cell development	22	4.30117	2.62839e-10
GO:0001556	oocyte maturation	8	0.703828	1.65688e-07
GO:0048599	oocyte development	6	0.742929	6.19566e-05
GO:0009994	oocyte differentiation	1	0.0391015	0.0391015
Cluster 10: cell morphogenesis (organelle localization)
observed gene count: 23
expected gene count: 2.2287874732334
uncorrected p-value: 5.35536490935403e-18
GO ID	term	observed gene count	expected gene count	uncorrected p-value
GO:0000132	establishment of mitotic spindle orientation	14	1.09484	4.44901e-13
GO:0030010	establishment of cell polarity	4	0.312812	0.000143704
GO:0040001	establishment of mitotic spindle localization	3	0.273711	0.00185555
GO:0000902	cell morphogenesis	3	0.351914	0.00419866
GO:0007163	establishment or maintenance of cell polarity	3	0.469218	0.0100716
Cluster 11: DNA repair
observed gene count: 31
expected gene count: 4.9658948965025
uncorrected p-value: 1.71233441704468e-16
GO ID	term	observed gene count	expected gene count	uncorrected p-value
GO:0006281	DNA repair	14	1.48586	7.42356e-11
GO:0006974	response to DNA damage stimulus	18	3.24543	2.78434e-09
GO:0033554	cellular response to stress	4	0.234609	3.28029e-05
GO:0006259	DNA metabolic process	1	0.50832	0.404644
Cluster 12: regulation of vulval development
observed gene count: 38
expected gene count: 7.78120538900785
uncorrected p-value: 4.731154967126e-16
GO ID	term	observed gene count	expected gene count	uncorrected p-value
GO:0040027	negative regulation of vulval development	36	7.23378	1.49338e-15
GO:0040028	regulation of vulval development	3	0.703828	0.0313907
Cluster 13: proteolysis
observed gene count: 57
expected gene count: 19.7462749821556
uncorrected p-value: 1.07210206019697e-12
GO ID	term	observed gene count	expected gene count	uncorrected p-value
GO:0051603	proteolysis involved in cellular protein catabolic process	14	0.547421	1.85777e-20
GO:0006511	ubiquitin-dependent protein catabolic process	19	2.89351	4.4565e-11
GO:0030163	protein catabolic process	14	4.92679	0.000428573
GO:0006508	proteolysis	21	12.0042	0.00991108
Cluster 14: regulation of multicellular organism growth
observed gene count: 45
expected gene count: 13.8028417201999
uncorrected p-value: 4.2149748888107e-12
GO ID	term	observed gene count	expected gene count	uncorrected p-value
GO:0040018	positive regulation of multicellular organism growth	44	13.2163	3.56222e-12
GO:0040014	regulation of multicellular organism growth	1	0.938437	0.616159
Cluster 15: nuclear import
observed gene count: 29
expected gene count: 6.37355014275517
uncorrected p-value: 8.51855638258226e-12
GO ID	term	observed gene count	expected gene count	uncorrected p-value
GO:0006886	intracellular protein transport	10	2.34609	0.000103056
GO:0008104	protein localization	7	1.21215	0.000158925
GO:0006606	protein import into nucleus	2	0.117305	0.00446491
GO:0046907	intracellular transport	2	0.156406	0.00869806
GO:0006913	nucleocytoplasmic transport	2	0.195508	0.0141218
GO:0033365	protein localization in organelle	2	0.312812	0.0365712
GO:0015031	protein transport	5	2.22879	0.0715923
GO:0051170	nuclear import	1	0.0782031	0.076675
GO:0006605	protein targeting	1	0.117305	0.11278
Cluster 16: gene silencing
observed gene count: 26
expected gene count: 5.59151945039258
uncorrected p-value: 6.07044544857244e-11
GO ID	term	observed gene count	expected gene count	uncorrected p-value
GO:0016246	RNA interference	25	5.31781	1.10217e-10
GO:0010608	posttranscriptional regulation of gene expression	1	0.117305	0.11278
GO:0016458	gene silencing	1	0.117305	0.11278
Cluster 17: microtubule-based process
observed gene count: 22
expected gene count: 4.26206727337616
uncorrected p-value: 2.1829332523961e-10
GO ID	term	observed gene count	expected gene count	uncorrected p-value
GO:0007052	mitotic spindle organization	20	2.85441	3.71183e-12
GO:0007017	microtubule-based process	5	0.977538	0.00251018
GO:0000226	microtubule cytoskeleton organization	1	0.312812	0.27321
GO:0007010	cytoskeleton organization	1	0.391015	0.328946
Cluster 18: fertilization
observed gene count: 17
expected gene count: 2.58070128479657
uncorrected p-value: 4.40941731458381e-10
GO ID	term	observed gene count	expected gene count	uncorrected p-value
GO:0035046	pronuclear migration	16	2.03328	7.62351e-11
GO:0009566	fertilization	1	0.0782031	0.076675
Cluster 19: regulation of cell cycle
observed gene count: 10
expected gene count: 0.742929157744468
uncorrected p-value: 5.44827843586826e-10
GO ID	term	observed gene count	expected gene count	uncorrected p-value
GO:0051726	regulation of cell cycle	8	0.50832	5.80827e-09
GO:0007346	regulation of mitotic cell cycle	2	0.117305	0.00446491
Cluster 20: spermatogenesis
observed gene count: 17
expected gene count: 2.65890435403283
uncorrected p-value: 7.31522342158302e-10
GO ID	term	observed gene count	expected gene count	uncorrected p-value
GO:0042006	masculinization of hermaphroditic germ-line	6	0.469218	2.6723e-06
GO:0007283	spermatogenesis	7	1.05574	6.15479e-05
GO:0018992	germ-line sex determination	2	0.0782031	0.00152809
GO:0040021	hermaphrodite germ-line sex determination	2	0.117305	0.00446491
GO:0040022	feminization of hermaphroditic germ-line	5	1.25125	0.0075915
GO:0007530	sex determination	1	0.117305	0.11278
Cluster 21: embryonic morphogenesis
observed gene count: 20
expected gene count: 3.91015346181299
uncorrected p-value: 1.68921151299856e-09
GO ID	term	observed gene count	expected gene count	uncorrected p-value
GO:0001703	gastrulation with mouth forming first	15	2.5025	1.88452e-08
GO:0048598	embryonic morphogenesis	5	1.29035	0.00866446
Cluster 22: gonad development
observed gene count: 23
expected gene count: 5.16140256959315
uncorrected p-value: 1.80713371808301e-09
GO ID	term	observed gene count	expected gene count	uncorrected p-value
GO:0008406	gonad development	23	5.1614	1.80713e-09
Cluster 23: cell fate determination
observed gene count: 12
expected gene count: 1.40765524625268
uncorrected p-value: 6.43284275279552e-09
GO ID	term	observed gene count	expected gene count	uncorrected p-value
GO:0045167	asymmetric protein localization involved in cell fate determination	6	0.703828	4.38431e-05
GO:0008105	asymmetric protein localization	5	0.547421	0.000135341
GO:0001709	cell fate determination	1	0.195508	0.180812
Cluster 24: DNA replication initiation
observed gene count: 6
expected gene count: 0.273710742326909
uncorrected p-value: 2.39844909627291e-08
GO ID	term	observed gene count	expected gene count	uncorrected p-value
GO:0006270	DNA replication initiation	6	0.273711	2.39845e-08
Cluster 25: germline cell cycle switching, mitotic to meiotic cell cycle
observed gene count: 11
expected gene count: 1.36855371163455
uncorrected p-value: 5.55085920118017e-08
GO ID	term	observed gene count	expected gene count	uncorrected p-value
GO:0051729	germline cell cycle switching, mitotic to meiotic cell cycle	11	1.36855	5.55086e-08
Cluster 26: asymmetric cell division
observed gene count: 9
expected gene count: 0.938436830835118
uncorrected p-value: 1.6068690377259e-07
GO ID	term	observed gene count	expected gene count	uncorrected p-value
GO:0042078	germ-line stem cell division	5	0.351914	1.00381e-05
GO:0008356	asymmetric cell division	4	0.586523	0.00224922
Cluster 27: cell fate specification
observed gene count: 13
expected gene count: 2.18968593861527
uncorrected p-value: 1.87664774156871e-07
GO ID	term	observed gene count	expected gene count	uncorrected p-value
GO:0009880	embryonic pattern specification	8	0.469218	2.31388e-09
GO:0001708	cell fate specification	10	1.52496	1.83283e-06
Cluster 28: GPI anchor biosynthetic process
observed gene count: 11
expected gene count: 1.52495985010707
uncorrected p-value: 1.93051683432317e-07
GO ID	term	observed gene count	expected gene count	uncorrected p-value
GO:0008654	phospholipid biosynthetic process	6	0.469218	2.6723e-06
GO:0006506	GPI anchor biosynthetic process	4	0.430117	0.000616386
GO:0046474	glycerophospholipid biosynthetic process	1	0.273711	0.24363
Cluster 29: positive regulation of transcription, DNA-dependent
observed gene count: 18
expected gene count: 4.53577801570307
uncorrected p-value: 6.16792717742416e-07
GO ID	term	observed gene count	expected gene count	uncorrected p-value
GO:0006357	regulation of transcription from RNA polymerase II promoter	8	1.64226	0.00019357
GO:0045944	positive regulation of transcription from RNA polymerase II promoter	9	2.77621	0.00175789
GO:0045893	positive regulation of transcription, DNA-dependent	1	0.234609	0.212847
Cluster 30: female meiosis
observed gene count: 7
expected gene count: 0.586523019271949
uncorrected p-value: 6.73991587499041e-07
GO ID	term	observed gene count	expected gene count	uncorrected p-value
GO:0040038	polar body extrusion after meiotic divisions	5	0.469218	5.71708e-05
GO:0007143	female meiosis	2	0.117305	0.00446491
Cluster 31: endocytosis
observed gene count: 21
expected gene count: 6.1389409350464
uncorrected p-value: 9.41746853429364e-07
GO ID	term	observed gene count	expected gene count	uncorrected p-value
GO:0043652	engulfment of apoptotic cell	13	3.20633	1.72353e-05
GO:0006897	endocytosis	3	0.586523	0.0190888
GO:0016192	vesicle-mediated transport	5	2.03328	0.051943
Cluster 32: negative regulation of multicellular organism growth
observed gene count: 16
expected gene count: 3.75374732334047
uncorrected p-value: 9.61325442191612e-07
GO ID	term	observed gene count	expected gene count	uncorrected p-value
GO:0040015	negative regulation of multicellular organism growth	16	3.75375	9.61325e-07
Cluster 33: mitosis
observed gene count: 12
expected gene count: 2.2287874732334
uncorrected p-value: 1.69829434090922e-06
GO ID	term	observed gene count	expected gene count	uncorrected p-value
GO:0007067	mitosis	10	1.99418	2.40318e-05
GO:0000280	nuclear division	1	0.0391015	0.0391015
GO:0000087	M phase of mitotic cell cycle	1	0.195508	0.180812
Cluster 34: centrosome cycle
observed gene count: 5
expected gene count: 0.273710742326909
uncorrected p-value: 1.78700395515785e-06
GO ID	term	observed gene count	expected gene count	uncorrected p-value
GO:0007098	centrosome cycle	3	0.117305	5.96852e-05
GO:0007099	centriole replication	3	0.195508	0.000562449
Cluster 35: cellular respiration
observed gene count: 7
expected gene count: 0.703827623126338
uncorrected p-value: 3.00545408275679e-06
GO ID	term	observed gene count	expected gene count	uncorrected p-value
GO:0006099	tricarboxylic acid cycle	6	0.50832	4.79777e-06
GO:0045333	cellular respiration	1	0.0782031	0.076675
Cluster 36: transcription initiation
observed gene count: 13
expected gene count: 2.77620895788722
uncorrected p-value: 3.344520323874e-06
GO ID	term	observed gene count	expected gene count	uncorrected p-value
GO:0006352	transcription initiation	6	0.469218	2.6723e-06
GO:0006351	transcription, DNA-dependent	5	1.32945	0.00983777
GO:0006367	transcription initiation from RNA polymerase II promoter	2	0.469218	0.0777803
Cluster 37: proton transport
observed gene count: 36
expected gene count: 15.6797153818701
uncorrected p-value: 3.98402744842391e-06
GO ID	term	observed gene count	expected gene count	uncorrected p-value
GO:0015986	ATP synthesis coupled proton transport	5	0.664726	0.000379228
GO:0055085	transmembrane transport	25	13.8419	0.00351241
GO:0006164	purine nucleotide biosynthetic process	2	0.195508	0.0141218
GO:0009150	purine ribonucleotide metabolic process	1	0.0391015	0.0391015
GO:0006754	ATP biosynthetic process	1	0.117305	0.11278
GO:0009165	nucleotide biosynthetic process	1	0.117305	0.11278
GO:0015672	monovalent inorganic cation transport	1	0.156406	0.147474
GO:0046034	ATP metabolic process	1	0.273711	0.24363
GO:0015992	proton transport	1	0.312812	0.27321
Cluster 38: cellular homeostasis
observed gene count: 10
expected gene count: 1.91597519628837
uncorrected p-value: 1.65940412798954e-05
GO ID	term	observed gene count	expected gene count	uncorrected p-value
GO:0045454	cell redox homeostasis	9	1.79867	6.22785e-05
GO:0019725	cellular homeostasis	1	0.0782031	0.076675
Cluster 39: regulation of transcription, DNA-dependent
observed gene count: 46
expected gene count: 23.773733047823
uncorrected p-value: 1.92049152510501e-05
GO ID	term	observed gene count	expected gene count	uncorrected p-value
GO:0006355	regulation of transcription, DNA-dependent	46	23.7737	1.92049e-05
Cluster 40: protein ubiquitination
observed gene count: 6
expected gene count: 0.625624553890079
uncorrected p-value: 2.02319429561219e-05
GO ID	term	observed gene count	expected gene count	uncorrected p-value
GO:0016567	protein ubiquitination	6	0.625625	2.02319e-05
Cluster 41: regulation of apoptosis
observed gene count: 7
expected gene count: 1.05574143468951
uncorrected p-value: 6.1547937955846e-05
GO ID	term	observed gene count	expected gene count	uncorrected p-value
GO:0008630	DNA damage response, signal transduction resulting in induction of apoptosis	3	0.156406	0.000231751
GO:0043065	positive regulation of apoptosis	2	0.234609	0.0206367
GO:0042981	regulation of apoptosis	2	0.234609	0.0206367
Cluster 42: RNA processing
observed gene count: 9
expected gene count: 1.99417826552463
uncorrected p-value: 0.00014429773402402
GO ID	term	observed gene count	expected gene count	uncorrected p-value
GO:0006396	RNA processing	6	1.25125	0.00133896
GO:0006397	mRNA processing	3	0.586523	0.0190888
Cluster 43: molting cycle, collagen and cuticulin-based cuticle
observed gene count: 24
expected gene count: 10.4792112776588
uncorrected p-value: 0.000157487271692566
GO ID	term	observed gene count	expected gene count	uncorrected p-value
GO:0018996	molting cycle, collagen and cuticulin-based cuticle	24	10.4792	0.000157487
Cluster 44: response to drug
observed gene count: 6
expected gene count: 0.899335296216988
uncorrected p-value: 0.000201518237660122
GO ID	term	observed gene count	expected gene count	uncorrected p-value
GO:0006120	mitochondrial electron transport, NADH to ubiquinone	3	0.195508	0.000562449
GO:0042493	response to drug	3	0.430117	0.00777769
GO:0022900	electron transport chain	2	0.195508	0.0141218
GO:0045333	cellular respiration	1	0.0782031	0.076675
GO:0042773	ATP synthesis coupled electron transport	1	0.117305	0.11278
Cluster 45: glycolysis
observed gene count: 6
expected gene count: 0.938436830835118
uncorrected p-value: 0.000259828016394072
GO ID	term	observed gene count	expected gene count	uncorrected p-value
GO:0019318	hexose metabolic process	2	0.0782031	0.00152809
GO:0006006	glucose metabolic process	2	0.234609	0.0206367
GO:0006096	glycolysis	2	0.430117	0.0664955
Cluster 46: cell migration
observed gene count: 13
expected gene count: 4.22296573875803
uncorrected p-value: 0.000311447851217589
GO ID	term	observed gene count	expected gene count	uncorrected p-value
GO:0016477	cell migration	13	4.22297	0.000311448
Cluster 47: collagen and cuticulin-based cuticle development
observed gene count: 12
expected gene count: 3.91015346181299
uncorrected p-value: 0.000538136631574466
GO ID	term	observed gene count	expected gene count	uncorrected p-value
GO:0040002	collagen and cuticulin-based cuticle development	12	3.87105	0.00049077
Cluster 48: RNA catabolic process
observed gene count: 4
expected gene count: 0.469218415417559
uncorrected p-value: 0.000895993330062179
GO ID	term	observed gene count	expected gene count	uncorrected p-value
GO:0006402	mRNA catabolic process	3	0.156406	0.000231751
GO:0006401	RNA catabolic process	2	0.195508	0.0141218
Cluster 49: negative regulation of transcription, DNA-dependent
observed gene count: 8
expected gene count: 2.11148286937902
uncorrected p-value: 0.00112744822840462
GO ID	term	observed gene count	expected gene count	uncorrected p-value
GO:0000122	negative regulation of transcription from RNA polymerase II promoter	6	1.56406	0.0043489
GO:0045892	negative regulation of transcription, DNA-dependent	2	0.391015	0.0558195
Cluster 50: nuclear mRNA splicing, via spliceosome
observed gene count: 5
expected gene count: 0.860233761598858
uncorrected p-value: 0.00137131357531836
GO ID	term	observed gene count	expected gene count	uncorrected p-value
GO:0000398	nuclear mRNA splicing, via spliceosome	5	0.782031	0.00086161
Cluster 51: translation
observed gene count: 15
expected gene count: 6.60815935046395
uncorrected p-value: 0.00273252896523685
GO ID	term	observed gene count	expected gene count	uncorrected p-value
GO:0006418	tRNA aminoacylation for protein translation	10	1.13394	8.2546e-08
GO:0043039	tRNA aminoacylation	3	0.312812	0.00288265
GO:0006412	translation	5	5.39601	0.63086
Cluster 52: embryonic axis specification
observed gene count: 4
expected gene count: 0.821132226980728
uncorrected p-value: 0.00818280703657745
GO ID	term	observed gene count	expected gene count	uncorrected p-value
GO:0000578	embryonic axis specification	1	0.0782031	0.076675
GO:0009952	anterior/posterior pattern formation	2	0.50832	0.08961
GO:0008595	determination of anterior/posterior axis, embryo	1	0.195508	0.180812
Cluster 53: positive regulation of embryonic development
observed gene count: 4
expected gene count: 0.977538365453248
uncorrected p-value: 0.0152861815478939
GO ID	term	observed gene count	expected gene count	uncorrected p-value
GO:0040019	positive regulation of embryonic development	4	0.860234	0.00969647
Cluster 54: nucleosome assembly
observed gene count: 8
expected gene count: 3.55823965024982
uncorrected p-value: 0.0261601095480898
GO ID	term	observed gene count	expected gene count	uncorrected p-value
GO:0006334	nucleosome assembly	7	3.48004	0.0597596
GO:0006333	chromatin assembly or disassembly	1	0.0782031	0.076675
Cluster 55: regulation of translation
observed gene count: 2
expected gene count: 0.273710742326909
uncorrected p-value: 0.0281490955790771
GO ID	term	observed gene count	expected gene count	uncorrected p-value
GO:0010608	posttranscriptional regulation of gene expression	1	0.117305	0.11278
GO:0006417	regulation of translation	1	0.156406	0.147474
Cluster 56: synapsis
observed gene count: 1
expected gene count: 0.0391015346181299
uncorrected p-value: 0.0391015346181299
GO ID	term	observed gene count	expected gene count	uncorrected p-value
GO:0007129	synapsis	1	0.0391015	0.0391015
Cluster 57: response to heat
observed gene count: 4
expected gene count: 1.32945217701642
uncorrected p-value: 0.0425684857503844
GO ID	term	observed gene count	expected gene count	uncorrected p-value
GO:0009266	response to temperature stimulus	1	0.0391015	0.0391015
GO:0009408	response to heat	3	1.29035	0.137293
Cluster 58: protein amino acid glycosylation
observed gene count: 4
expected gene count: 1.52495985010707
uncorrected p-value: 0.0649193238614798
GO ID	term	observed gene count	expected gene count	uncorrected p-value
GO:0006486	protein amino acid glycosylation	3	1.32945	0.14646
GO:0006487	protein amino acid N-linked glycosylation	1	0.234609	0.212847
Cluster 59: mitochondrial transport
observed gene count: 2
expected gene count: 0.469218415417559
uncorrected p-value: 0.0777802869654327
GO ID	term	observed gene count	expected gene count	uncorrected p-value
GO:0006839	mitochondrial transport	1	0.0391015	0.0391015
GO:0007005	mitochondrion organization	1	0.351914	0.301634
Cluster 60: defecation
observed gene count: 4
expected gene count: 1.72046752319772
uncorrected p-value: 0.0922554369911338
GO ID	term	observed gene count	expected gene count	uncorrected p-value
GO:0030421	defecation	4	1.60316	0.0752748
Cluster 61: rRNA processing
observed gene count: 3
expected gene count: 1.09484296930764
uncorrected p-value: 0.0948013413891151
GO ID	term	observed gene count	expected gene count	uncorrected p-value
GO:0042254	ribosome biogenesis	2	0.469218	0.0777803
GO:0006364	rRNA processing	1	0.625625	0.471807
Cluster 62: synaptic transmission
observed gene count: 3
expected gene count: 1.09484296930764
uncorrected p-value: 0.0948013413891151
GO ID	term	observed gene count	expected gene count	uncorrected p-value
GO:0048489	synaptic vesicle transport	2	0.547421	0.101925
GO:0007268	synaptic transmission	1	0.391015	0.328946
Cluster 63: sulfur metabolic process
observed gene count: 3
expected gene count: 1.40765524625268
uncorrected p-value: 0.165357794196193
GO ID	term	observed gene count	expected gene count	uncorrected p-value
GO:0006790	sulfur metabolic process	1	0.0782031	0.076675
GO:0006633	fatty acid biosynthetic process	2	0.586523	0.114669
Cluster 64: cation transport
observed gene count: 11
expected gene count: 8.99335296216988
uncorrected p-value: 0.290481164168904
GO ID	term	observed gene count	expected gene count	uncorrected p-value
GO:0030001	metal ion transport	6	0.625625	2.02319e-05
GO:0015672	monovalent inorganic cation transport	1	0.156406	0.147474
GO:0006812	cation transport	4	2.22879	0.183117
Cluster 65: chromatin modification
observed gene count: 1
expected gene count: 0.351913811563169
uncorrected p-value: 0.30163365003251
GO ID	term	observed gene count	expected gene count	uncorrected p-value
GO:0016568	chromatin modification	1	0.234609	0.212847
Cluster 66: chromatin assembly or disassembly
observed gene count: 1
expected gene count: 0.391015346181299
uncorrected p-value: 0.328946329047592
GO ID	term	observed gene count	expected gene count	uncorrected p-value
GO:0006333	chromatin assembly or disassembly	1	0.0782031	0.076675

## Sheet: EE_50-30
sample name: EE_50-30
number of associated genes in the sample: 2004
Cluster 1: growth
observed gene count: 346
expected gene count: 84.1258029978587
uncorrected p-value: 3.31917534583425e-118
GO ID	term	observed gene count	expected gene count	uncorrected p-value
GO:0002119	nematode larval development	345	82.2037	1.48982e-120
GO:0040007	growth	281	67.9443	1.39099e-95
GO:0009791	post-embryonic development	1	0.715203	0.518961
Cluster 2: hermaphrodite genitalia development
observed gene count: 176
expected gene count: 32.5864561027837
uncorrected p-value: 4.51443367944956e-78
GO ID	term	observed gene count	expected gene count	uncorrected p-value
GO:0040035	hermaphrodite genitalia development	176	32.1395	4.25152e-79
Cluster 3: regulation of growth rate
observed gene count: 235
expected gene count: 67.5867237687366
uncorrected p-value: 2.20701449260546e-64
GO ID	term	observed gene count	expected gene count	uncorrected p-value
GO:0040010	positive regulation of growth rate	232	67.4526	1.20507e-62
GO:0040009	regulation of growth rate	2	0.0894004	0.00199716
GO:0045927	positive regulation of growth	1	0.0447002	0.0447002
Cluster 4: aging
observed gene count: 145
expected gene count: 36.3412740899358
uncorrected p-value: 7.41661829388561e-47
GO ID	term	observed gene count	expected gene count	uncorrected p-value
GO:0008340	determination of adult life span	145	36.2966	6.36011e-47
GO:0007568	aging	1	0.0894004	0.0874033
Cluster 5: meiosis
observed gene count: 67
expected gene count: 9.02944325481799
uncorrected p-value: 1.16078317976788e-39
GO ID	term	observed gene count	expected gene count	uncorrected p-value
GO:0045132	meiotic chromosome segregation	41	5.18522	4.77915e-26
GO:0007126	meiosis	41	5.31933	1.50877e-25
GO:0007049	cell cycle	6	0.715203	4.30268e-05
GO:0007059	chromosome segregation	5	0.625803	0.000253272
GO:0051321	meiotic cell cycle	1	0.0447002	0.0447002
Cluster 6: epithelium development
observed gene count: 85
expected gene count: 16.6284796573876
uncorrected p-value: 4.33342717833298e-36
GO ID	term	observed gene count	expected gene count	uncorrected p-value
GO:0002009	morphogenesis of an epithelium	84	16.5391	1.85666e-35
GO:0060429	epithelium development	1	0.0447002	0.0447002
Cluster 7: apoptosis
observed gene count: 92
expected gene count: 21.3667023554604
uncorrected p-value: 1.05589549635148e-32
GO ID	term	observed gene count	expected gene count	uncorrected p-value
GO:0006915	apoptosis	84	18.8188	3.93101e-31
GO:0012501	programmed cell death	3	0.625803	0.0224223
GO:0008219	cell death	6	2.41381	0.0328456
Cluster 8: oogenesis
observed gene count: 64
expected gene count: 12.4713597430407
uncorrected p-value: 1.34660093634203e-27
GO ID	term	observed gene count	expected gene count	uncorrected p-value
GO:0048477	oogenesis	39	8.40364	8.34197e-16
GO:0007276	gamete generation	21	3.79952	1.13318e-10
GO:0032504	multicellular organism reproduction	4	0.312901	0.000124964
GO:0048609	reproductive process in a multicellular organism	2	0.223501	0.0182468
Cluster 9: regulation of vulval development
observed gene count: 54
expected gene count: 8.8953426124197
uncorrected p-value: 2.46371594205041e-27
GO ID	term	observed gene count	expected gene count	uncorrected p-value
GO:0040027	negative regulation of vulval development	52	8.26954	3.54547e-27
GO:0040028	regulation of vulval development	3	0.804604	0.0440471
Cluster 10: gene silencing
observed gene count: 51
expected gene count: 8.67184154175589
uncorrected p-value: 3.39468067145218e-25
GO ID	term	observed gene count	expected gene count	uncorrected p-value
GO:0016246	RNA interference	40	6.07923	4.81906e-22
GO:0000122	negative regulation of transcription from RNA polymerase II promoter	9	1.78801	5.4374e-05
GO:0031053	primary microRNA processing	1	0.0447002	0.0447002
GO:0045892	negative regulation of transcription, DNA-dependent	2	0.447002	0.070804
GO:0016458	gene silencing	1	0.134101	0.128198
Cluster 11: oocyte maturation
observed gene count: 44
expected gene count: 6.43683083511777
uncorrected p-value: 7.36069892795785e-25
GO ID	term	observed gene count	expected gene count	uncorrected p-value
GO:0007281	germ cell development	33	4.91702	9.82475e-19
GO:0001556	oocyte maturation	8	0.804604	4.5998e-07
GO:0009994	oocyte differentiation	1	0.0447002	0.0447002
GO:0048599	oocyte development	3	0.849304	0.0506183
Cluster 12: DNA repair
observed gene count: 40
expected gene count: 5.67692719486081
uncorrected p-value: 2.7660384740696e-23
GO ID	term	observed gene count	expected gene count	uncorrected p-value
GO:0006281	DNA repair	18	1.69861	6.72489e-15
GO:0006974	response to DNA damage stimulus	23	3.71012	1.10146e-12
GO:0033554	cellular response to stress	4	0.268201	5.55319e-05
GO:0006259	DNA metabolic process	3	0.581103	0.0182128
Cluster 13: cell cycle
observed gene count: 38
expected gene count: 5.54282655246253
uncorrected p-value: 1.02002806699385e-21
GO ID	term	observed gene count	expected gene count	uncorrected p-value
GO:0007052	mitotic spindle organization	29	3.26312	1.66762e-20
GO:0007049	cell cycle	6	0.715203	4.30268e-05
GO:0007017	microtubule-based process	5	1.11751	0.00446173
GO:0000226	microtubule cytoskeleton organization	2	0.357602	0.0467286
GO:0007010	cytoskeleton organization	1	0.447002	0.36704
Cluster 14: cell morphogenesis
observed gene count: 27
expected gene count: 2.54791220556745
uncorrected p-value: 1.16484328719616e-21
GO ID	term	observed gene count	expected gene count	uncorrected p-value
GO:0000132	establishment of mitotic spindle orientation	16	1.25161	4.37663e-15
GO:0040001	establishment of mitotic spindle localization	5	0.312901	3.45796e-06
GO:0030010	establishment of cell polarity	4	0.357602	0.000241048
GO:0007163	establishment or maintenance of cell polarity	4	0.536403	0.00147579
GO:0000902	cell morphogenesis	3	0.402302	0.00611479
Cluster 15: gastrulation
observed gene count: 30
expected gene count: 4.47002141327623
uncorrected p-value: 3.65847296920282e-17
GO ID	term	observed gene count	expected gene count	uncorrected p-value
GO:0001703	gastrulation with mouth forming first	22	2.86081	2.37882e-14
GO:0048598	embryonic morphogenesis	6	1.47511	0.00310144
GO:0007369	gastrulation	2	0.134101	0.00581309
Cluster 16: proteolysis
observed gene count: 68
expected gene count: 22.573608137045
uncorrected p-value: 6.8333800549194e-16
GO ID	term	observed gene count	expected gene count	uncorrected p-value
GO:0051603	proteolysis involved in cellular protein catabolic process	14	0.625803	1.21745e-19
GO:0006511	ubiquitin-dependent protein catabolic process	25	3.30782	6.57274e-16
GO:0030163	protein catabolic process	16	5.63223	0.000163796
GO:0006508	proteolysis	22	13.723	0.0208674
Cluster 17: nuclear import
observed gene count: 35
expected gene count: 7.28613490364026
uncorrected p-value: 8.19150739690406e-15
GO ID	term	observed gene count	expected gene count	uncorrected p-value
GO:0008104	protein localization	9	1.38571	5.7672e-06
GO:0006886	intracellular protein transport	12	2.68201	1.16967e-05
GO:0051170	nuclear import	2	0.0894004	0.00199716
GO:0033365	protein localization in organelle	3	0.357602	0.00421603
GO:0046907	intracellular transport	2	0.178801	0.0112814
GO:0006913	nucleocytoplasmic transport	2	0.223501	0.0182468
GO:0015031	protein transport	5	2.54791	0.110567
GO:0006606	protein import into nucleus	1	0.134101	0.128198
GO:0006605	protein targeting	1	0.134101	0.128198
GO:0045184	establishment of protein localization	1	0.134101	0.128198
Cluster 18: gonad development
observed gene count: 31
expected gene count: 5.90042826552463
uncorrected p-value: 2.05168628398386e-14
GO ID	term	observed gene count	expected gene count	uncorrected p-value
GO:0008406	gonad development	31	5.90043	2.05169e-14
Cluster 19: transcription initiation
observed gene count: 22
expected gene count: 3.17371520342612
uncorrected p-value: 2.72383119450024e-13
GO ID	term	observed gene count	expected gene count	uncorrected p-value
GO:0006351	transcription, DNA-dependent	10	1.51981	1.52375e-06
GO:0006352	transcription initiation	6	0.536403	5.79599e-06
GO:0006367	transcription initiation from RNA polymerase II promoter	6	0.536403	5.79599e-06
GO:0006366	transcription from RNA polymerase II promoter	2	0.581103	0.112452
Cluster 20: spermatogenesis
observed gene count: 21
expected gene count: 3.03961456102784
uncorrected p-value: 1.016053954051e-12
GO ID	term	observed gene count	expected gene count	uncorrected p-value
GO:0040022	feminization of hermaphroditic germ-line	9	1.43041	7.70555e-06
GO:0042006	masculinization of hermaphroditic germ-line	5	0.536403	0.00010801
GO:0007283	spermatogenesis	6	1.20691	0.00104199
GO:0007530	sex determination	2	0.134101	0.00581309
GO:0040021	hermaphrodite germ-line sex determination	2	0.134101	0.00581309
GO:0018992	germ-line sex determination	1	0.0894004	0.0874033
Cluster 21: mitosis
observed gene count: 19
expected gene count: 2.54791220556745
uncorrected p-value: 2.60773398979853e-12
GO ID	term	observed gene count	expected gene count	uncorrected p-value
GO:0007067	mitosis	16	2.27971	3.88286e-10
GO:0000087	M phase of mitotic cell cycle	3	0.223501	0.000833232
GO:0000280	nuclear division	1	0.0447002	0.0447002
Cluster 22: oviposition
observed gene count: 47
expected gene count: 14.7957708779443
uncorrected p-value: 2.99231823627332e-12
GO ID	term	observed gene count	expected gene count	uncorrected p-value
GO:0018991	oviposition	42	14.2594	4.61163e-10
GO:0032504	multicellular organism reproduction	4	0.312901	0.000124964
GO:0048609	reproductive process in a multicellular organism	2	0.223501	0.0182468
Cluster 23: asymmetric cell division
observed gene count: 12
expected gene count: 1.0728051391863
uncorrected p-value: 1.0093280440338e-10
GO ID	term	observed gene count	expected gene count	uncorrected p-value
GO:0008356	asymmetric cell division	7	0.670503	1.65397e-06
GO:0042078	germ-line stem cell division	5	0.402302	1.92385e-05
Cluster 24: regulation of cell cycle
observed gene count: 10
expected gene count: 0.715203426124197
uncorrected p-value: 1.94897063926619e-10
GO ID	term	observed gene count	expected gene count	uncorrected p-value
GO:0051726	regulation of cell cycle	8	0.581103	1.6544e-08
GO:0007346	regulation of mitotic cell cycle	2	0.134101	0.00581309
Cluster 25: regulation of transcription, DNA-dependent
observed gene count: 64
expected gene count: 27.1777301927195
uncorrected p-value: 2.79819661596937e-10
GO ID	term	observed gene count	expected gene count	uncorrected p-value
GO:0006355	regulation of transcription, DNA-dependent	64	27.1777	2.7982e-10
Cluster 26: DNA replication initiation
observed gene count: 7
expected gene count: 0.312901498929336
uncorrected p-value: 3.53032547632891e-10
GO ID	term	observed gene count	expected gene count	uncorrected p-value
GO:0006270	DNA replication initiation	7	0.312901	3.53033e-10
Cluster 27: RNA processing
observed gene count: 16
expected gene count: 2.27971092077088
uncorrected p-value: 3.88285515925482e-10
GO ID	term	observed gene count	expected gene count	uncorrected p-value
GO:0006396	RNA processing	11	1.43041	7.48609e-08
GO:0006397	mRNA processing	5	0.670503	0.000365933
Cluster 28: GPI anchor metabolic process
observed gene count: 13
expected gene count: 1.74330835117773
uncorrected p-value: 7.46683666569136e-09
GO ID	term	observed gene count	expected gene count	uncorrected p-value
GO:0008654	phospholipid biosynthetic process	6	0.536403	5.79599e-06
GO:0006506	GPI anchor biosynthetic process	5	0.491702	6.54206e-05
GO:0006505	GPI anchor metabolic process	1	0.0894004	0.0874033
GO:0046474	glycerophospholipid biosynthetic process	1	0.312901	0.273947
Cluster 29: fertilization
observed gene count: 19
expected gene count: 4.02301927194861
uncorrected p-value: 1.43427428586688e-08
GO ID	term	observed gene count	expected gene count	uncorrected p-value
GO:0035046	pronuclear migration	17	2.32441	5.24228e-11
GO:0051647	nucleus localization	1	0.0447002	0.0447002
GO:0009566	fertilization	1	0.0894004	0.0874033
GO:0007018	microtubule-based movement	3	1.20691	0.117914
Cluster 30: centrosome cycle
observed gene count: 6
expected gene count: 0.312901498929336
uncorrected p-value: 5.3324877217378e-08
GO ID	term	observed gene count	expected gene count	uncorrected p-value
GO:0007099	centriole replication	4	0.223501	1.91947e-05
GO:0007098	centrosome cycle	3	0.134101	8.91882e-05
Cluster 31: female meiosis
observed gene count: 8
expected gene count: 0.670503211991435
uncorrected p-value: 7.63187889134433e-08
GO ID	term	observed gene count	expected gene count	uncorrected p-value
GO:0040038	polar body extrusion after meiotic divisions	6	0.536403	5.79599e-06
GO:0007143	female meiosis	2	0.134101	0.00581309
Cluster 32: protein ubiquitination
observed gene count: 8
expected gene count: 0.715203426124197
uncorrected p-value: 1.46617262659308e-07
GO ID	term	observed gene count	expected gene count	uncorrected p-value
GO:0016567	protein ubiquitination	8	0.715203	1.46617e-07
Cluster 33: cell fate determination
observed gene count: 11
expected gene count: 1.60920770877944
uncorrected p-value: 2.9547156938527e-07
GO ID	term	observed gene count	expected gene count	uncorrected p-value
GO:0045167	asymmetric protein localization involved in cell fate determination	6	0.804604	9.23327e-05
GO:0001709	cell fate determination	2	0.223501	0.0182468
GO:0008105	asymmetric protein localization	3	0.625803	0.0224223
Cluster 34: cell migration
observed gene count: 19
expected gene count: 4.82762312633833
uncorrected p-value: 3.0594613014566e-07
GO ID	term	observed gene count	expected gene count	uncorrected p-value
GO:0016477	cell migration	19	4.82762	3.05946e-07
Cluster 35: positive regulation of transcription, DNA-dependent
observed gene count: 19
expected gene count: 5.18522483940043
uncorrected p-value: 9.56992604422037e-07
GO ID	term	observed gene count	expected gene count	uncorrected p-value
GO:0045944	positive regulation of transcription from RNA polymerase II promoter	11	3.17372	0.000299334
GO:0006357	regulation of transcription from RNA polymerase II promoter	7	1.87741	0.00240726
GO:0045893	positive regulation of transcription, DNA-dependent	1	0.268201	0.239969
Cluster 36: negative regulation of multicellular organism growth
observed gene count: 17
expected gene count: 4.29122055674518
uncorrected p-value: 1.14998035613918e-06
GO ID	term	observed gene count	expected gene count	uncorrected p-value
GO:0040015	negative regulation of multicellular organism growth	17	4.29122	1.14998e-06
Cluster 37: molting cycle, collagen and cuticulin-based cuticle
observed gene count: 31
expected gene count: 11.9796573875803
uncorrected p-value: 1.46740454417666e-06
GO ID	term	observed gene count	expected gene count	uncorrected p-value
GO:0018996	molting cycle, collagen and cuticulin-based cuticle	31	11.9797	1.4674e-06
Cluster 38: regulation of multicellular organism growth
observed gene count: 37
expected gene count: 15.7791755888651
uncorrected p-value: 1.67501433727624e-06
GO ID	term	observed gene count	expected gene count	uncorrected p-value
GO:0040018	positive regulation of multicellular organism growth	36	15.1087	1.584e-06
GO:0040014	regulation of multicellular organism growth	2	1.07281	0.291563
Cluster 39: germline cell cycle switching, mitotic to meiotic cell cycle
observed gene count: 10
expected gene count: 1.56450749464668
uncorrected p-value: 2.04770643664484e-06
GO ID	term	observed gene count	expected gene count	uncorrected p-value
GO:0051729	germline cell cycle switching, mitotic to meiotic cell cycle	10	1.56451	2.04771e-06
Cluster 40: endocytosis
observed gene count: 21
expected gene count: 7.01793361884368
uncorrected p-value: 7.5278293514513e-06
GO ID	term	observed gene count	expected gene count	uncorrected p-value
GO:0043652	engulfment of apoptotic cell	12	3.66542	0.000279795
GO:0016192	vesicle-mediated transport	7	2.32441	0.00811398
GO:0006897	endocytosis	2	0.670503	0.142894
Cluster 41: tRNA processing
observed gene count: 11
expected gene count: 2.19031049250535
uncorrected p-value: 8.38537759342165e-06
GO ID	term	observed gene count	expected gene count	uncorrected p-value
GO:0006418	tRNA aminoacylation for protein translation	6	1.29631	0.0015491
GO:0008033	tRNA processing	4	0.759904	0.00593396
GO:0043039	tRNA aminoacylation	2	0.357602	0.0467286
Cluster 42: cellular homeostasis
observed gene count: 11
expected gene count: 2.19031049250535
uncorrected p-value: 8.38537759342165e-06
GO ID	term	observed gene count	expected gene count	uncorrected p-value
GO:0045454	cell redox homeostasis	10	2.05621	2.90195e-05
GO:0019725	cellular homeostasis	1	0.0894004	0.0874033
Cluster 43: RNA catabolic process
observed gene count: 7
expected gene count: 0.849304068522484
uncorrected p-value: 1.1057646467891e-05
GO ID	term	observed gene count	expected gene count	uncorrected p-value
GO:0006402	mRNA catabolic process	3	0.178801	0.00034481
GO:0006401	RNA catabolic process	3	0.223501	0.000833232
GO:0000184	nuclear-transcribed mRNA catabolic process, nonsense-mediated decay	2	0.312901	0.0361005
Cluster 44: protein amino acid phosphorylation
observed gene count: 38
expected gene count: 18.9081905781585
uncorrected p-value: 4.20507300327743e-05
GO ID	term	observed gene count	expected gene count	uncorrected p-value
GO:0006468	protein amino acid phosphorylation	38	18.8188	3.79718e-05
Cluster 45: regulation of apoptosis
observed gene count: 7
expected gene count: 1.20690578158458
uncorrected p-value: 0.00014225045680934
GO ID	term	observed gene count	expected gene count	uncorrected p-value
GO:0008630	DNA damage response, signal transduction resulting in induction of apoptosis	3	0.178801	0.00034481
GO:0043065	positive regulation of apoptosis	3	0.268201	0.00161093
GO:0042981	regulation of apoptosis	1	0.268201	0.239969
Cluster 46: collagen and cuticulin-based cuticle development
observed gene count: 14
expected gene count: 4.47002141327623
uncorrected p-value: 0.000145811841019295
GO ID	term	observed gene count	expected gene count	uncorrected p-value
GO:0040002	collagen and cuticulin-based cuticle development	14	4.42532	0.000130714
Cluster 47: nuclear mRNA splicing, via spliceosome
observed gene count: 6
expected gene count: 0.894004282655246
uncorrected p-value: 0.000178482955645637
GO ID	term	observed gene count	expected gene count	uncorrected p-value
GO:0000398	nuclear mRNA splicing, via spliceosome	6	0.894004	0.000178483
Cluster 48: glycolysis
observed gene count: 6
expected gene count: 1.0728051391863
uncorrected p-value: 0.000531482356653387
GO ID	term	observed gene count	expected gene count	uncorrected p-value
GO:0019318	hexose metabolic process	2	0.0894004	0.00199716
GO:0006006	glucose metabolic process	2	0.268201	0.0265647
GO:0006096	glycolysis	2	0.491702	0.0840421
Cluster 49: nucleotide biosynthetic process
observed gene count: 6
expected gene count: 1.0728051391863
uncorrected p-value: 0.000531482356653387
GO ID	term	observed gene count	expected gene count	uncorrected p-value
GO:0009165	nucleotide biosynthetic process	3	0.134101	8.91882e-05
GO:0009150	purine ribonucleotide metabolic process	1	0.0447002	0.0447002
GO:0009168	purine ribonucleoside monophosphate biosynthetic process	1	0.134101	0.128198
GO:0006164	purine nucleotide biosynthetic process	1	0.223501	0.204402
Cluster 50: cellular respiration
observed gene count: 5
expected gene count: 0.804603854389722
uncorrected p-value: 0.000933274294599858
GO ID	term	observed gene count	expected gene count	uncorrected p-value
GO:0006099	tricarboxylic acid cycle	4	0.581103	0.00205656
GO:0045333	cellular respiration	1	0.0894004	0.0874033
Cluster 51: kinetochore organization
observed gene count: 5
expected gene count: 0.849304068522484
uncorrected p-value: 0.00122021361326877
GO ID	term	observed gene count	expected gene count	uncorrected p-value
GO:0000070	mitotic sister chromatid segregation	5	0.849304	0.00122021
GO:0051383	kinetochore organization	2	0.0894004	0.00199716
Cluster 52: digestive tract morphogenesis
observed gene count: 4
expected gene count: 0.625802997858672
uncorrected p-value: 0.00277787780086858
GO ID	term	observed gene count	expected gene count	uncorrected p-value
GO:0048557	embryonic digestive tract morphogenesis	3	0.447002	0.00844708
GO:0048546	digestive tract morphogenesis	1	0.178801	0.167171
Cluster 53: transmembrane transport
observed gene count: 28
expected gene count: 15.9132762312634
uncorrected p-value: 0.0029633383587885
GO ID	term	observed gene count	expected gene count	uncorrected p-value
GO:0055085	transmembrane transport	28	15.8239	0.00273781
Cluster 54: chromatin modification
observed gene count: 4
expected gene count: 0.715203426124197
uncorrected p-value: 0.00470236234138695
GO ID	term	observed gene count	expected gene count	uncorrected p-value
GO:0016568	chromatin modification	3	0.268201	0.00161093
GO:0006333	chromatin assembly or disassembly	1	0.0894004	0.0874033
Cluster 55: cation transport
observed gene count: 9
expected gene count: 3.21841541755889
uncorrected p-value: 0.00471065816020212
GO ID	term	observed gene count	expected gene count	uncorrected p-value
GO:0030001	metal ion transport	5	0.715203	0.000512708
GO:0006812	cation transport	4	2.54791	0.250344
Cluster 56: regulation of nuclear division
observed gene count: 2
expected gene count: 0.178800856531049
uncorrected p-value: 0.0112813771736639
GO ID	term	observed gene count	expected gene count	uncorrected p-value
GO:0030071	regulation of mitotic metaphase/anaphase transition	1	0.0447002	0.0447002
GO:0051783	regulation of nuclear division	1	0.134101	0.128198
Cluster 57: mitochondrial transport
observed gene count: 3
expected gene count: 0.536402569593148
uncorrected p-value: 0.0144844461664408
GO ID	term	observed gene count	expected gene count	uncorrected p-value
GO:0006839	mitochondrial transport	1	0.0447002	0.0447002
GO:0007005	mitochondrion organization	2	0.402302	0.0583326
Cluster 58: nucleosome assembly
observed gene count: 9
expected gene count: 4.06771948608137
uncorrected p-value: 0.0205421482343563
GO ID	term	observed gene count	expected gene count	uncorrected p-value
GO:0006334	nucleosome assembly	8	3.97832	0.045669
GO:0006333	chromatin assembly or disassembly	1	0.0894004	0.0874033
Cluster 59: rRNA processing
observed gene count: 4
expected gene count: 1.25160599571734
uncorrected p-value: 0.0346386544099884
GO ID	term	observed gene count	expected gene count	uncorrected p-value
GO:0042254	ribosome biogenesis	2	0.536403	0.0979536
GO:0006364	rRNA processing	2	0.715203	0.158695
Cluster 60: synapsis
observed gene count: 1
expected gene count: 0.0447002141327623
uncorrected p-value: 0.0447002141327623
GO ID	term	observed gene count	expected gene count	uncorrected p-value
GO:0007129	synapsis	1	0.0447002	0.0447002
Cluster 61: fatty acid metabolic process
observed gene count: 4
expected gene count: 1.47510706638116
uncorrected p-value: 0.0581919727305999
GO ID	term	observed gene count	expected gene count	uncorrected p-value
GO:0006633	fatty acid biosynthetic process	2	0.670503	0.142894
GO:0006631	fatty acid metabolic process	2	0.759904	0.174797
Cluster 62: negative regulation of Ras protein signal transduction
observed gene count: 2
expected gene count: 0.447002141327623
uncorrected p-value: 0.0708039592145605
GO ID	term	observed gene count	expected gene count	uncorrected p-value
GO:0046580	negative regulation of Ras protein signal transduction	2	0.402302	0.0583326
Cluster 63: regulation of Rab GTPase activity
observed gene count: 4
expected gene count: 1.65390792291221
uncorrected p-value: 0.0818430903263322
GO ID	term	observed gene count	expected gene count	uncorrected p-value
GO:0032313	regulation of Rab GTPase activity	3	0.938704	0.0650825
GO:0051056	regulation of small GTPase mediated signal transduction	1	0.625803	0.472874
Cluster 64: protein amino acid glycosylation
observed gene count: 4
expected gene count: 1.74330835117773
uncorrected p-value: 0.0951866309683275
GO ID	term	observed gene count	expected gene count	uncorrected p-value
GO:0006486	protein amino acid glycosylation	4	1.51981	0.0637131
GO:0006487	protein amino acid N-linked glycosylation	1	0.268201	0.239969
Cluster 65: cellular respiration
observed gene count: 2
expected gene count: 0.58110278372591
uncorrected p-value: 0.112451975506352
GO ID	term	observed gene count	expected gene count	uncorrected p-value
GO:0045333	cellular respiration	1	0.0894004	0.0874033
GO:0042773	ATP synthesis coupled electron transport	1	0.134101	0.128198
Cluster 66: histone modification
observed gene count: 1
expected gene count: 0.134100642398287
uncorrected p-value: 0.128198360719069
GO ID	term	observed gene count	expected gene count	uncorrected p-value
GO:0016570	histone modification	1	0.0447002	0.0447002
Cluster 67: anterior/posterior pattern formation
observed gene count: 2
expected gene count: 0.715203426124197
uncorrected p-value: 0.158695416712832
GO ID	term	observed gene count	expected gene count	uncorrected p-value
GO:0009952	anterior/posterior pattern formation	2	0.581103	0.112452
Cluster 68: response to heat
observed gene count: 3
expected gene count: 1.51980728051392
uncorrected p-value: 0.193227906983856
GO ID	term	observed gene count	expected gene count	uncorrected p-value
GO:0009266	response to temperature stimulus	1	0.0447002	0.0447002
GO:0009408	response to heat	2	1.47511	0.437521
Cluster 69: nucleoside metabolic process
observed gene count: 1
expected gene count: 0.402301927194861
uncorrected p-value: 0.337416215082554
GO ID	term	observed gene count	expected gene count	uncorrected p-value
GO:0009116	nucleoside metabolic process	1	0.402302	0.337416
Cluster 70: synaptic transmission
observed gene count: 1
expected gene count: 0.625802997858672
uncorrected p-value: 0.472874205443716
GO ID	term	observed gene count	expected gene count	uncorrected p-value
GO:0007268	synaptic transmission	1	0.447002	0.36704

## Sheet: EE_50-60
sample name: EE_50-60
number of associated genes in the sample: 1451
Cluster 1: growth
observed gene count: 519
expected gene count: 109.78301213419
uncorrected p-value: 1.43718239422677e-217
GO ID	term	observed gene count	expected gene count	uncorrected p-value
GO:0009792	embryonic development ending in birth or egg hatching	487	95.1863	7.17237e-218
GO:0002119	nematode larval development	278	59.5197	1.34583e-107
GO:0040007	growth	221	49.1952	3.42573e-81
Cluster 2: hermaphrodite genitalia development
observed gene count: 167
expected gene count: 23.5942853319058
uncorrected p-value: 6.45736806670837e-92
GO ID	term	observed gene count	expected gene count	uncorrected p-value
GO:0040035	hermaphrodite genitalia development	167	23.2706	6.3027e-93
Cluster 3: positive regulation of growth
observed gene count: 180
expected gene count: 48.936295503212
uncorrected p-value: 1.89196061870284e-52
GO ID	term	observed gene count	expected gene count	uncorrected p-value
GO:0040010	positive regulation of growth rate	179	48.8392	6.33521e-52
GO:0045927	positive regulation of growth	1	0.0323653	0.0323653
Cluster 4: epithelium development
observed gene count: 79
expected gene count: 12.0398822269807
uncorrected p-value: 5.08111481814447e-41
GO ID	term	observed gene count	expected gene count	uncorrected p-value
GO:0002009	morphogenesis of an epithelium	78	11.9752	2.85123e-40
GO:0060429	epithelium development	1	0.0323653	0.0323653
Cluster 5: meiosis
observed gene count: 69
expected gene count: 9.41829496788008
uncorrected p-value: 3.03079951515024e-39
GO ID	term	observed gene count	expected gene count	uncorrected p-value
GO:0007052	mitotic spindle organization	25	2.36267	2.41482e-19
GO:0045132	meiotic chromosome segregation	26	3.75437	5.0816e-15
GO:0007126	meiosis	25	3.85147	8.25528e-14
GO:0007059	chromosome segregation	6	0.453114	2.73232e-06
GO:0007049	cell cycle	4	0.517844	0.00145594
GO:0000226	microtubule cytoskeleton organization	3	0.258922	0.0016768
GO:0007017	microtubule-based process	4	0.809132	0.00803129
GO:0051321	meiotic cell cycle	1	0.0323653	0.0323653
Cluster 6: germ cell development
observed gene count: 46
expected gene count: 4.23985099928622
uncorrected p-value: 5.58024765926708e-35
GO ID	term	observed gene count	expected gene count	uncorrected p-value
GO:0007281	germ cell development	36	3.56018	1.93439e-26
GO:0042078	germ-line stem cell division	7	0.291287	1.2472e-09
GO:0008356	asymmetric cell division	6	0.485479	4.42863e-06
Cluster 7: aging
observed gene count: 101
expected gene count: 26.3129684154176
uncorrected p-value: 5.04096044020332e-31
GO ID	term	observed gene count	expected gene count	uncorrected p-value
GO:0008340	determination of adult life span	101	26.2806	4.55256e-31
GO:0007568	aging	1	0.0647305	0.0636837
Cluster 8: regulation of vulval development
observed gene count: 47
expected gene count: 6.44068968593862
uncorrected p-value: 4.60642655230625e-27
GO ID	term	observed gene count	expected gene count	uncorrected p-value
GO:0040027	negative regulation of vulval development	45	5.98758	1.49525e-26
GO:0040028	regulation of vulval development	3	0.582575	0.0191955
Cluster 9: gene silencing
observed gene count: 39
expected gene count: 4.62823429693076
uncorrected p-value: 3.38880707060055e-25
GO ID	term	observed gene count	expected gene count	uncorrected p-value
GO:0016246	RNA interference	38	4.40168	5.24098e-25
GO:0016458	gene silencing	2	0.0970958	0.00307277
GO:0010629	negative regulation of gene expression	1	0.0970958	0.0939892
Cluster 10: apoptosis
observed gene count: 68
expected gene count: 15.4706013561742
uncorrected p-value: 1.33182420962669e-24
GO ID	term	observed gene count	expected gene count	uncorrected p-value
GO:0006915	apoptosis	61	13.6258	1.27651e-22
GO:0012501	programmed cell death	4	0.453114	0.00084326
GO:0008219	cell death	5	1.74772	0.0301678
Cluster 11: gastrulation
observed gene count: 31
expected gene count: 3.23652748037116
uncorrected p-value: 3.66670743698255e-22
GO ID	term	observed gene count	expected gene count	uncorrected p-value
GO:0001703	gastrulation with mouth forming first	22	2.07138	3.12524e-17
GO:0048598	embryonic morphogenesis	7	1.06805	7.4839e-05
GO:0007369	gastrulation	2	0.0970958	0.00307277
Cluster 12: gonad development
observed gene count: 34
expected gene count: 4.27221627408994
uncorrected p-value: 2.85107767299375e-21
GO ID	term	observed gene count	expected gene count	uncorrected p-value
GO:0008406	gonad development	34	4.27222	2.85108e-21
Cluster 13: cell morphogenesis
observed gene count: 23
expected gene count: 1.84482066381156
uncorrected p-value: 8.42389901759013e-20
GO ID	term	observed gene count	expected gene count	uncorrected p-value
GO:0000132	establishment of mitotic spindle orientation	15	0.906228	1.05184e-15
GO:0040001	establishment of mitotic spindle localization	4	0.226557	3.53669e-05
GO:0030010	establishment of cell polarity	3	0.258922	0.0016768
GO:0007163	establishment or maintenance of cell polarity	2	0.388383	0.0557184
GO:0000902	cell morphogenesis	1	0.291287	0.256311
Cluster 14: mitosis
observed gene count: 24
expected gene count: 2.36266506067095
uncorrected p-value: 3.756341080692e-18
GO ID	term	observed gene count	expected gene count	uncorrected p-value
GO:0007067	mitosis	15	1.65063	4.44972e-11
GO:0000070	mitotic sister chromatid segregation	7	0.61494	1.31267e-06
GO:0000087	M phase of mitotic cell cycle	3	0.161826	0.00032217
GO:0000280	nuclear division	1	0.0323653	0.0323653
Cluster 15: oogenesis
observed gene count: 39
expected gene count: 9.02991167023555
uncorrected p-value: 1.91233748383143e-14
GO ID	term	observed gene count	expected gene count	uncorrected p-value
GO:0048477	oogenesis	23	6.08467	5.33482e-08
GO:0007276	gamete generation	15	2.75105	8.95282e-08
GO:0032504	multicellular organism reproduction	2	0.226557	0.0197264
GO:0048609	reproductive process in a multicellular organism	1	0.161826	0.151691
Cluster 16: DNA repair
observed gene count: 26
expected gene count: 4.11038990007138
uncorrected p-value: 5.0553878244552e-14
GO ID	term	observed gene count	expected gene count	uncorrected p-value
GO:0006974	response to DNA damage stimulus	19	2.68632	1.5639e-11
GO:0033554	cellular response to stress	4	0.194192	1.55581e-05
GO:0006281	DNA repair	7	1.22988	0.000192003
GO:0006259	DNA metabolic process	1	0.420749	0.348036
Cluster 17: proteolysis
observed gene count: 52
expected gene count: 16.3444637758744
uncorrected p-value: 3.0368135397766e-13
GO ID	term	observed gene count	expected gene count	uncorrected p-value
GO:0006511	ubiquitin-dependent protein catabolic process	24	2.39503	5.38968e-18
GO:0051603	proteolysis involved in cellular protein catabolic process	8	0.453114	2.98181e-09
GO:0030163	protein catabolic process	10	4.07802	0.00798703
GO:0006508	proteolysis	15	9.93614	0.0760907
Cluster 18: regulation of transcription, DNA-dependent
observed gene count: 58
expected gene count: 19.6780870806567
uncorrected p-value: 3.41241025129256e-13
GO ID	term	observed gene count	expected gene count	uncorrected p-value
GO:0006355	regulation of transcription, DNA-dependent	58	19.6781	3.41241e-13
Cluster 19: fertilization
observed gene count: 20
expected gene count: 2.91287473233405
uncorrected p-value: 8.25255094063973e-12
GO ID	term	observed gene count	expected gene count	uncorrected p-value
GO:0035046	pronuclear migration	16	1.68299	4.6157e-12
GO:0007018	microtubule-based movement	5	0.873862	0.00157181
GO:0051647	nucleus localization	1	0.0323653	0.0323653
GO:0009566	fertilization	1	0.0647305	0.0636837
Cluster 20: oviposition
observed gene count: 38
expected gene count: 10.7129059600286
uncorrected p-value: 1.91652917550468e-11
GO ID	term	observed gene count	expected gene count	uncorrected p-value
GO:0018991	oviposition	35	10.3245	4.08175e-10
GO:0032504	multicellular organism reproduction	2	0.226557	0.0197264
GO:0048609	reproductive process in a multicellular organism	1	0.161826	0.151691
Cluster 21: DNA replication initiation
observed gene count: 7
expected gene count: 0.226556923625981
uncorrected p-value: 3.66829013597654e-11
GO ID	term	observed gene count	expected gene count	uncorrected p-value
GO:0006270	DNA replication initiation	7	0.226557	3.66829e-11
Cluster 22: nuclear import
observed gene count: 25
expected gene count: 5.275539793005
uncorrected p-value: 1.19472314698932e-10
GO ID	term	observed gene count	expected gene count	uncorrected p-value
GO:0008104	protein localization	7	1.00332	4.87442e-05
GO:0051170	nuclear import	2	0.0647305	0.00104681
GO:0006886	intracellular protein transport	7	1.94192	0.00317349
GO:0006913	nucleocytoplasmic transport	2	0.161826	0.00980767
GO:0033365	protein localization in organelle	2	0.258922	0.025743
GO:0006606	protein import into nucleus	1	0.0970958	0.0939892
GO:0045184	establishment of protein localization	1	0.0970958	0.0939892
GO:0015031	protein transport	4	1.84482	0.112712
GO:0046907	intracellular transport	1	0.129461	0.123314
Cluster 23: sex determination
observed gene count: 13
expected gene count: 1.26224571734475
uncorrected p-value: 1.50365492265879e-10
GO ID	term	observed gene count	expected gene count	uncorrected p-value
GO:0040022	feminization of hermaphroditic germ-line	10	1.03569	4.11797e-08
GO:0007530	sex determination	2	0.0970958	0.00307277
GO:0018992	germ-line sex determination	1	0.0647305	0.0636837
GO:0040021	hermaphrodite germ-line sex determination	1	0.0970958	0.0939892
Cluster 24: positive regulation of transcription, DNA-dependent
observed gene count: 19
expected gene count: 3.75437187723055
uncorrected p-value: 6.45015386256439e-09
GO ID	term	observed gene count	expected gene count	uncorrected p-value
GO:0045944	positive regulation of transcription from RNA polymerase II promoter	11	2.29793	1.69505e-05
GO:0006357	regulation of transcription from RNA polymerase II promoter	7	1.35934	0.000366749
GO:0045893	positive regulation of transcription, DNA-dependent	1	0.194192	0.17915
Cluster 25: cell migration
observed gene count: 18
expected gene count: 3.49544967880086
uncorrected p-value: 1.20886927072267e-08
GO ID	term	observed gene count	expected gene count	uncorrected p-value
GO:0016477	cell migration	18	3.49545	1.20887e-08
Cluster 26: transcription initiation
observed gene count: 14
expected gene count: 2.29793451106353
uncorrected p-value: 5.58174108876538e-08
GO ID	term	observed gene count	expected gene count	uncorrected p-value
GO:0006352	transcription initiation	8	0.388383	5.20843e-10
GO:0006351	transcription, DNA-dependent	4	1.10042	0.0234285
GO:0006367	transcription initiation from RNA polymerase II promoter	2	0.388383	0.0557184
GO:0006366	transcription from RNA polymerase II promoter	1	0.420749	0.348036
Cluster 27: RNA processing
observed gene count: 12
expected gene count: 1.65062901498929
uncorrected p-value: 6.23193481868071e-08
GO ID	term	observed gene count	expected gene count	uncorrected p-value
GO:0006396	RNA processing	9	1.03569	5.44064e-07
GO:0006397	mRNA processing	3	0.485479	0.0115017
Cluster 28: negative regulation of gene expression
observed gene count: 12
expected gene count: 1.74772483940043
uncorrected p-value: 1.23107794289095e-07
GO ID	term	observed gene count	expected gene count	uncorrected p-value
GO:0000122	negative regulation of transcription from RNA polymerase II promoter	10	1.29461	4.27422e-07
GO:0010629	negative regulation of gene expression	1	0.0970958	0.0939892
GO:0045892	negative regulation of transcription, DNA-dependent	1	0.323653	0.280386
Cluster 29: cell fate determination
observed gene count: 9
expected gene count: 1.16514989293362
uncorrected p-value: 1.62503143191477e-06
GO ID	term	observed gene count	expected gene count	uncorrected p-value
GO:0045167	asymmetric protein localization involved in cell fate determination	4	0.582575	0.00232484
GO:0008105	asymmetric protein localization	3	0.453114	0.00942544
GO:0001709	cell fate determination	2	0.161826	0.00980767
Cluster 30: positive regulation of multicellular organism growth
observed gene count: 30
expected gene count: 11.4249420057102
uncorrected p-value: 1.88627020987644e-06
GO ID	term	observed gene count	expected gene count	uncorrected p-value
GO:0040018	positive regulation of multicellular organism growth	30	10.9395	7.69326e-07
Cluster 31: collagen and cuticulin-based cuticle development
observed gene count: 14
expected gene count: 3.23652748037116
uncorrected p-value: 4.28198014472969e-06
GO ID	term	observed gene count	expected gene count	uncorrected p-value
GO:0040002	collagen and cuticulin-based cuticle development	14	3.20416	3.79471e-06
Cluster 32: protein neddylation
observed gene count: 3
expected gene count: 0.0970958244111349
uncorrected p-value: 3.38351823447997e-05
GO ID	term	observed gene count	expected gene count	uncorrected p-value
GO:0045116	protein neddylation	3	0.0970958	3.38352e-05
Cluster 33: centrosome cycle
observed gene count: 4
expected gene count: 0.226556923625981
uncorrected p-value: 3.53669065726105e-05
GO ID	term	observed gene count	expected gene count	uncorrected p-value
GO:0007099	centriole replication	3	0.161826	0.00032217
GO:0007098	centrosome cycle	2	0.0970958	0.00307277
Cluster 34: digestive tract morphogenesis
observed gene count: 5
expected gene count: 0.453113847251963
uncorrected p-value: 5.53084463829509e-05
GO ID	term	observed gene count	expected gene count	uncorrected p-value
GO:0048557	embryonic digestive tract morphogenesis	4	0.323653	0.000196252
GO:0048546	digestive tract morphogenesis	1	0.129461	0.123314
Cluster 35: female meiosis
observed gene count: 5
expected gene count: 0.485479122055675
uncorrected p-value: 8.0748357024978e-05
GO ID	term	observed gene count	expected gene count	uncorrected p-value
GO:0040038	polar body extrusion after meiotic divisions	4	0.388383	0.000439177
GO:0007143	female meiosis	1	0.0970958	0.0939892
Cluster 36: positive regulation of embryonic development
observed gene count: 6
expected gene count: 0.809131870092791
uncorrected p-value: 0.000118682049497716
GO ID	term	observed gene count	expected gene count	uncorrected p-value
GO:0040019	positive regulation of embryonic development	6	0.712036	5.43389e-05
Cluster 37: cytokinesis, completion of separation
observed gene count: 3
expected gene count: 0.129461099214847
uncorrected p-value: 0.000132062047452192
GO ID	term	observed gene count	expected gene count	uncorrected p-value
GO:0007109	cytokinesis, completion of separation	3	0.129461	0.000132062
Cluster 38: protein amino acid phosphorylation
observed gene count: 29
expected gene count: 13.69051124197
uncorrected p-value: 0.000144725380489265
GO ID	term	observed gene count	expected gene count	uncorrected p-value
GO:0006468	protein amino acid phosphorylation	29	13.6258	0.000133497
Cluster 39: embryonic axis specification
observed gene count: 5
expected gene count: 0.550209671663098
uncorrected p-value: 0.000157637610481991
GO ID	term	observed gene count	expected gene count	uncorrected p-value
GO:0009880	embryonic pattern specification	4	0.388383	0.000439177
GO:0000578	embryonic axis specification	1	0.0647305	0.0636837
Cluster 40: molting cycle, collagen and cuticulin-based cuticle
observed gene count: 21
expected gene count: 8.67389364739472
uncorrected p-value: 0.000195279826001963
GO ID	term	observed gene count	expected gene count	uncorrected p-value
GO:0018996	molting cycle, collagen and cuticulin-based cuticle	21	8.67389	0.00019528
Cluster 41: endocytosis
observed gene count: 14
expected gene count: 5.08134814418273
uncorrected p-value: 0.000616894254791345
GO ID	term	observed gene count	expected gene count	uncorrected p-value
GO:0043652	engulfment of apoptotic cell	8	2.65395	0.00507038
GO:0006897	endocytosis	2	0.485479	0.0832041
GO:0043277	apoptotic cell clearance	1	0.258922	0.231432
GO:0016192	vesicle-mediated transport	3	1.68299	0.236828
Cluster 42: glycolysis
observed gene count: 5
expected gene count: 0.776766595289079
uncorrected p-value: 0.000896832017278054
GO ID	term	observed gene count	expected gene count	uncorrected p-value
GO:0019318	hexose metabolic process	2	0.0647305	0.00104681
GO:0006006	glucose metabolic process	2	0.194192	0.0143971
GO:0006096	glycolysis	1	0.356018	0.303681
Cluster 43: negative regulation of multicellular organism growth
observed gene count: 10
expected gene count: 3.10706638115632
uncorrected p-value: 0.00110860235219225
GO ID	term	observed gene count	expected gene count	uncorrected p-value
GO:0040015	negative regulation of multicellular organism growth	10	3.10707	0.0011086
Cluster 44: ATP metabolic process
observed gene count: 4
expected gene count: 0.582574946466809
uncorrected p-value: 0.0023248397421357
GO ID	term	observed gene count	expected gene count	uncorrected p-value
GO:0009165	nucleotide biosynthetic process	2	0.0970958	0.00307277
GO:0009150	purine ribonucleotide metabolic process	1	0.0323653	0.0323653
GO:0046034	ATP metabolic process	1	0.226557	0.205721
Cluster 45: cellular respiration
observed gene count: 4
expected gene count: 0.679670770877944
uncorrected p-value: 0.00420954299403101
GO ID	term	observed gene count	expected gene count	uncorrected p-value
GO:0006099	tricarboxylic acid cycle	3	0.420749	0.0075864
GO:0045333	cellular respiration	1	0.0647305	0.0636837
Cluster 46: RNA catabolic process
observed gene count: 3
expected gene count: 0.38838329764454
uncorrected p-value: 0.00597834002873058
GO ID	term	observed gene count	expected gene count	uncorrected p-value
GO:0006401	RNA catabolic process	3	0.161826	0.00032217
GO:0006402	mRNA catabolic process	1	0.129461	0.123314
Cluster 47: phospholipid biosynthetic process
observed gene count: 4
expected gene count: 0.776766595289079
uncorrected p-value: 0.00692090661235431
GO ID	term	observed gene count	expected gene count	uncorrected p-value
GO:0008654	phospholipid biosynthetic process	3	0.388383	0.00597834
GO:0046474	glycerophospholipid biosynthetic process	1	0.226557	0.205721
Cluster 48: chromatin modification
observed gene count: 3
expected gene count: 0.453113847251963
uncorrected p-value: 0.00942544166513218
GO ID	term	observed gene count	expected gene count	uncorrected p-value
GO:0016568	chromatin modification	2	0.194192	0.0143971
GO:0051276	chromosome organization	1	0.258922	0.231432
Cluster 49: rRNA processing
observed gene count: 4
expected gene count: 0.906227694503926
uncorrected p-value: 0.0120422811186561
GO ID	term	observed gene count	expected gene count	uncorrected p-value
GO:0006364	rRNA processing	3	0.517844	0.0138199
GO:0042254	ribosome biogenesis	1	0.388383	0.326223
Cluster 50: cellular homeostasis
observed gene count: 5
expected gene count: 1.58589846538187
uncorrected p-value: 0.0207296285108967
GO ID	term	observed gene count	expected gene count	uncorrected p-value
GO:0045454	cell redox homeostasis	4	1.4888	0.0610471
GO:0019725	cellular homeostasis	1	0.0647305	0.0636837
Cluster 51: germline cell cycle switching, mitotic to meiotic cell cycle
observed gene count: 4
expected gene count: 1.13278461812991
uncorrected p-value: 0.025792615605394
GO ID	term	observed gene count	expected gene count	uncorrected p-value
GO:0051729	germline cell cycle switching, mitotic to meiotic cell cycle	4	1.13278	0.0257926
Cluster 52: oocyte maturation
observed gene count: 4
expected gene count: 1.16514989293362
uncorrected p-value: 0.0282948822490885
GO ID	term	observed gene count	expected gene count	uncorrected p-value
GO:0001556	oocyte maturation	4	0.582575	0.00232484
GO:0048599	oocyte development	1	0.61494	0.464867
Cluster 53: regulation of Rab GTPase activity
observed gene count: 4
expected gene count: 1.19751516773733
uncorrected p-value: 0.0309364514655976
GO ID	term	observed gene count	expected gene count	uncorrected p-value
GO:0032313	regulation of Rab GTPase activity	3	0.679671	0.0291268
GO:0051056	regulation of small GTPase mediated signal transduction	1	0.453114	0.369143
Cluster 54: synapsis
observed gene count: 1
expected gene count: 0.0323652748037116
uncorrected p-value: 0.0323652748037116
GO ID	term	observed gene count	expected gene count	uncorrected p-value
GO:0007129	synapsis	1	0.0323653	0.0323653
Cluster 55: negative regulation of Ras protein signal transduction
observed gene count: 3
expected gene count: 0.776766595289079
uncorrected p-value: 0.0412815878169192
GO ID	term	observed gene count	expected gene count	uncorrected p-value
GO:0046580	negative regulation of Ras protein signal transduction	2	0.291287	0.0323967
GO:0051056	regulation of small GTPase mediated signal transduction	1	0.453114	0.369143
Cluster 56: nucleosome assembly
observed gene count: 6
expected gene count: 2.94524000713776
uncorrected p-value: 0.0750044728273938
GO ID	term	observed gene count	expected gene count	uncorrected p-value
GO:0006333	chromatin assembly or disassembly	1	0.0647305	0.0636837
GO:0006334	nucleosome assembly	5	2.88051	0.161888
Cluster 57: tRNA aminoacylation
observed gene count: 3
expected gene count: 1.06805406852248
uncorrected p-value: 0.0901165401694412
GO ID	term	observed gene count	expected gene count	uncorrected p-value
GO:0043039	tRNA aminoacylation	2	0.258922	0.025743
GO:0006418	tRNA aminoacylation for protein translation	2	0.938593	0.241245
Cluster 58: anterior/posterior pattern formation
observed gene count: 2
expected gene count: 0.517844396859386
uncorrected p-value: 0.0931160709125312
GO ID	term	observed gene count	expected gene count	uncorrected p-value
GO:0009952	anterior/posterior pattern formation	2	0.420749	0.0644697
Cluster 59: response to heat
observed gene count: 3
expected gene count: 1.1004193433262
uncorrected p-value: 0.0965702249740338
GO ID	term	observed gene count	expected gene count	uncorrected p-value
GO:0009408	response to heat	3	1.06805	0.0901165
Cluster 60: regulation of apoptosis
observed gene count: 1
expected gene count: 0.258922198429693
uncorrected p-value: 0.231431661729608
GO ID	term	observed gene count	expected gene count	uncorrected p-value
GO:0042981	regulation of apoptosis	1	0.194192	0.17915
Cluster 61: mRNA transport
observed gene count: 14
expected gene count: 11.5220378301213
uncorrected p-value: 0.266088058320714
GO ID	term	observed gene count	expected gene count	uncorrected p-value
GO:0051028	mRNA transport	1	0.0323653	0.0323653
GO:0055085	transmembrane transport	13	11.4573	0.360937
Cluster 62: synaptic transmission
observed gene count: 1
expected gene count: 0.453113847251963
uncorrected p-value: 0.369143265376016
GO ID	term	observed gene count	expected gene count	uncorrected p-value
GO:0007268	synaptic transmission	1	0.323653	0.280386
Cluster 63: cation transport
observed gene count: 6
expected gene count: 8.51206727337616
uncorrected p-value: 0.85637304989593
GO ID	term	observed gene count	expected gene count	uncorrected p-value
GO:0030001	metal ion transport	3	0.517844	0.0138199
GO:0006814	sodium ion transport	2	1.65063	0.494771
GO:0006812	cation transport	2	1.84482	0.554572

## Sheet: EE_50-90
sample name: EE_50-90
number of associated genes in the sample: 1396
Cluster 1: growth
observed gene count: 496
expected gene count: 105.621698786581
uncorrected p-value: 5.95940453327157e-206
GO ID	term	observed gene count	expected gene count	uncorrected p-value
GO:0009792	embryonic development ending in birth or egg hatching	470	91.5782	1.58958e-210
GO:0002119	nematode larval development	263	57.2637	8.55174e-100
GO:0040007	growth	210	47.3305	5.2019e-76
GO:0009791	post-embryonic development	1	0.498216	0.397232
Cluster 2: hermaphrodite genitalia development
observed gene count: 148
expected gene count: 22.6999464668094
uncorrected p-value: 5.87171236215615e-76
GO ID	term	observed gene count	expected gene count	uncorrected p-value
GO:0040035	hermaphrodite genitalia development	148	22.3886	7.94398e-77
Cluster 3: positive regulation of growth
observed gene count: 172
expected gene count: 47.0813704496788
uncorrected p-value: 1.15452495379406e-49
GO ID	term	observed gene count	expected gene count	uncorrected p-value
GO:0040010	positive regulation of growth rate	171	46.988	3.87381e-49
GO:0045927	positive regulation of growth	1	0.0311385	0.0311385
Cluster 4: meiosis
observed gene count: 65
expected gene count: 9.06129550321199
uncorrected p-value: 2.3943619586312e-36
GO ID	term	observed gene count	expected gene count	uncorrected p-value
GO:0007052	mitotic spindle organization	26	2.27311	5.61644e-21
GO:0007126	meiosis	26	3.70548	3.96933e-15
GO:0045132	meiotic chromosome segregation	25	3.61206	1.86928e-14
GO:0007049	cell cycle	6	0.498216	5.52186e-06
GO:0007059	chromosome segregation	4	0.435939	0.000729612
GO:0007017	microtubule-based process	5	0.778462	0.000918168
GO:0000226	microtubule cytoskeleton organization	3	0.249108	0.00150015
Cluster 5: aging
observed gene count: 104
expected gene count: 25.3155781584582
uncorrected p-value: 1.95795343950967e-34
GO ID	term	observed gene count	expected gene count	uncorrected p-value
GO:0008340	determination of adult life span	104	25.2844	1.75848e-34
GO:0007568	aging	1	0.0622769	0.061308
Cluster 6: epithelium development
observed gene count: 67
expected gene count: 11.5835117773019
uncorrected p-value: 2.21694107162284e-31
GO ID	term	observed gene count	expected gene count	uncorrected p-value
GO:0002009	morphogenesis of an epithelium	66	11.5212	1.13339e-30
GO:0060429	epithelium development	1	0.0311385	0.0311385
Cluster 7: gastrulation
observed gene count: 34
expected gene count: 3.11384725196288
uncorrected p-value: 3.20902489641997e-26
GO ID	term	observed gene count	expected gene count	uncorrected p-value
GO:0001703	gastrulation with mouth forming first	24	1.99286	4.33036e-20
GO:0048598	embryonic morphogenesis	8	1.02757	6.00735e-06
GO:0007369	gastrulation	2	0.0934154	0.00284654
Cluster 8: regulation of vulval development
observed gene count: 44
expected gene count: 6.19655603140614
uncorrected p-value: 7.76526316452401e-25
GO ID	term	observed gene count	expected gene count	uncorrected p-value
GO:0040027	negative regulation of vulval development	43	5.76062	3.10052e-25
GO:0040028	regulation of vulval development	2	0.560493	0.106753
Cluster 9: germ cell development
observed gene count: 33
expected gene count: 4.07913990007138
uncorrected p-value: 7.20988614577332e-21
GO ID	term	observed gene count	expected gene count	uncorrected p-value
GO:0007281	germ cell development	26	3.42523	5.16234e-16
GO:0042078	germ-line stem cell division	4	0.280246	0.00010405
GO:0008356	asymmetric cell division	4	0.467077	0.000970474
Cluster 10: gene silencing
observed gene count: 33
expected gene count: 4.45280157030692
uncorrected p-value: 1.3591662838789e-19
GO ID	term	observed gene count	expected gene count	uncorrected p-value
GO:0016246	RNA interference	32	4.23483	2.58371e-19
GO:0010629	negative regulation of gene expression	1	0.0934154	0.0905388
GO:0016458	gene silencing	1	0.0934154	0.0905388
Cluster 11: apoptosis
observed gene count: 56
expected gene count: 14.8841898643826
uncorrected p-value: 2.57765902033095e-17
GO ID	term	observed gene count	expected gene count	uncorrected p-value
GO:0006915	apoptosis	50	13.1093	7.56979e-16
GO:0012501	programmed cell death	3	0.435939	0.00847904
GO:0008219	cell death	4	1.68148	0.0872177
Cluster 12: gonad development
observed gene count: 29
expected gene count: 4.11027837259101
uncorrected p-value: 8.92138464747984e-17
GO ID	term	observed gene count	expected gene count	uncorrected p-value
GO:0008406	gonad development	29	4.11028	8.92138e-17
Cluster 13: DNA repair
observed gene count: 27
expected gene count: 3.95458600999286
uncorrected p-value: 2.43779900540067e-15
GO ID	term	observed gene count	expected gene count	uncorrected p-value
GO:0006974	response to DNA damage stimulus	19	2.58449	8.06418e-12
GO:0006281	DNA repair	11	1.18326	1.4254e-08
GO:0033554	cellular response to stress	3	0.186831	0.000561491
GO:0006259	DNA metabolic process	1	0.4048	0.337207
Cluster 14: cell morphogenesis
observed gene count: 18
expected gene count: 1.77489293361884
uncorrected p-value: 6.67956375157747e-14
GO ID	term	observed gene count	expected gene count	uncorrected p-value
GO:0000132	establishment of mitotic spindle orientation	12	0.871877	1.5209e-11
GO:0040001	establishment of mitotic spindle localization	4	0.217969	3.03884e-05
GO:0000902	cell morphogenesis	1	0.280246	0.247781
GO:0007163	establishment or maintenance of cell polarity	1	0.373662	0.315899
Cluster 15: transcription initiation
observed gene count: 17
expected gene count: 1.80603140613847
uncorrected p-value: 1.30686894720217e-12
GO ID	term	observed gene count	expected gene count	uncorrected p-value
GO:0006351	transcription, DNA-dependent	10	1.05871	5.50379e-08
GO:0006352	transcription initiation	5	0.373662	1.91747e-05
GO:0006366	transcription from RNA polymerase II promoter	3	0.4048	0.00681845
Cluster 16: proteolysis
observed gene count: 49
expected gene count: 15.7249286224126
uncorrected p-value: 3.23427495583942e-12
GO ID	term	observed gene count	expected gene count	uncorrected p-value
GO:0006511	ubiquitin-dependent protein catabolic process	19	2.30425	8.81293e-13
GO:0051603	proteolysis involved in cellular protein catabolic process	6	0.435939	2.18475e-06
GO:0030163	protein catabolic process	14	3.92345	4.05382e-05
GO:0006508	proteolysis	13	9.55951	0.164573
Cluster 17: mitosis
observed gene count: 16
expected gene count: 1.77489293361884
uncorrected p-value: 1.24853098336547e-11
GO ID	term	observed gene count	expected gene count	uncorrected p-value
GO:0007067	mitosis	15	1.58806	2.59306e-11
GO:0000087	M phase of mitotic cell cycle	2	0.155692	0.00910066
Cluster 18: oogenesis
observed gene count: 34
expected gene count: 8.68763383297645
uncorrected p-value: 1.52918426538145e-11
GO ID	term	observed gene count	expected gene count	uncorrected p-value
GO:0048477	oogenesis	22	5.85403	1.17477e-07
GO:0007276	gamete generation	10	2.64677	0.000312361
GO:0032504	multicellular organism reproduction	2	0.217969	0.0183344
GO:0048609	reproductive process in a multicellular organism	1	0.155692	0.1463
Cluster 19: oviposition
observed gene count: 37
expected gene count: 10.3068344039971
uncorrected p-value: 2.56886943767317e-11
GO ID	term	observed gene count	expected gene count	uncorrected p-value
GO:0018991	oviposition	34	9.93317	5.77964e-10
GO:0032504	multicellular organism reproduction	2	0.217969	0.0183344
GO:0048609	reproductive process in a multicellular organism	1	0.155692	0.1463
Cluster 20: DNA replication initiation
observed gene count: 7
expected gene count: 0.217969307637402
uncorrected p-value: 2.79731469260705e-11
GO ID	term	observed gene count	expected gene count	uncorrected p-value
GO:0006270	DNA replication initiation	7	0.217969	2.79731e-11
Cluster 21: regulation of transcription, DNA-dependent
observed gene count: 51
expected gene count: 18.9321912919343
uncorrected p-value: 2.35592142330212e-10
GO ID	term	observed gene count	expected gene count	uncorrected p-value
GO:0006355	regulation of transcription, DNA-dependent	51	18.9322	2.35592e-10
Cluster 22: RNA processing
observed gene count: 14
expected gene count: 1.58806209850107
uncorrected p-value: 3.32577511192421e-10
GO ID	term	observed gene count	expected gene count	uncorrected p-value
GO:0006396	RNA processing	10	0.996431	2.86579e-08
GO:0006397	mRNA processing	4	0.467077	0.000970474
Cluster 23: nuclear mRNA splicing, via spliceosome
observed gene count: 10
expected gene count: 0.685046395431834
uncorrected p-value: 3.81618048865344e-10
GO ID	term	observed gene count	expected gene count	uncorrected p-value
GO:0000398	nuclear mRNA splicing, via spliceosome	10	0.622769	1.15417e-10
Cluster 24: nuclear import
observed gene count: 23
expected gene count: 5.0755710206995
uncorrected p-value: 1.66801685445337e-09
GO ID	term	observed gene count	expected gene count	uncorrected p-value
GO:0008104	protein localization	7	0.965293	3.81577e-05
GO:0006886	intracellular protein transport	9	1.86831	9.4971e-05
GO:0051170	nuclear import	2	0.0622769	0.000968932
GO:0006913	nucleocytoplasmic transport	2	0.155692	0.00910066
GO:0006606	protein import into nucleus	1	0.0934154	0.0905388
GO:0006605	protein targeting	1	0.0934154	0.0905388
GO:0045184	establishment of protein localization	1	0.0934154	0.0905388
GO:0046907	intracellular transport	1	0.124554	0.11886
GO:0033365	protein localization in organelle	1	0.249108	0.223601
GO:0015031	protein transport	1	1.77489	0.835404
Cluster 25: protein neddylation
observed gene count: 9
expected gene count: 0.591630977872948
uncorrected p-value: 1.87007107486235e-09
GO ID	term	observed gene count	expected gene count	uncorrected p-value
GO:0016567	protein ubiquitination	6	0.498216	5.52186e-06
GO:0045116	protein neddylation	3	0.0934154	3.01292e-05
Cluster 26: centrosome cycle
observed gene count: 6
expected gene count: 0.217969307637402
uncorrected p-value: 6.14688772905953e-09
GO ID	term	observed gene count	expected gene count	uncorrected p-value
GO:0007099	centriole replication	4	0.155692	4.56483e-06
GO:0007098	centrosome cycle	3	0.0934154	3.01292e-05
Cluster 27: molting cycle
observed gene count: 29
expected gene count: 8.34511063526053
uncorrected p-value: 7.38941260912781e-09
GO ID	term	observed gene count	expected gene count	uncorrected p-value
GO:0018996	molting cycle, collagen and cuticulin-based cuticle	29	8.34511	7.38941e-09
GO:0042303	molting cycle	1	0.0311385	0.0311385
Cluster 28: negative regulation of gene expression
observed gene count: 13
expected gene count: 1.68147751605996
uncorrected p-value: 8.27335260424402e-09
GO ID	term	observed gene count	expected gene count	uncorrected p-value
GO:0000122	negative regulation of transcription from RNA polymerase II promoter	9	1.24554	3.06923e-06
GO:0045892	negative regulation of transcription, DNA-dependent	3	0.311385	0.00306779
GO:0010629	negative regulation of gene expression	1	0.0934154	0.0905388
Cluster 29: sex determination
observed gene count: 12
expected gene count: 1.52578515346181
uncorrected p-value: 2.51966896478545e-08
GO ID	term	observed gene count	expected gene count	uncorrected p-value
GO:0040022	feminization of hermaphroditic germ-line	7	0.996431	4.75318e-05
GO:0007530	sex determination	2	0.0934154	0.00284654
GO:0042006	masculinization of hermaphroditic germ-line	2	0.373662	0.0519949
GO:0040021	hermaphrodite germ-line sex determination	1	0.0934154	0.0905388
Cluster 30: fertilization
observed gene count: 16
expected gene count: 3.11384725196288
uncorrected p-value: 8.2551474305578e-08
GO ID	term	observed gene count	expected gene count	uncorrected p-value
GO:0035046	pronuclear migration	14	1.6192	4.42066e-10
GO:0051258	protein polymerization	4	0.529354	0.0016101
GO:0051647	nucleus localization	1	0.0311385	0.0311385
GO:0007018	microtubule-based movement	3	0.840739	0.0505826
GO:0009566	fertilization	1	0.0622769	0.061308
Cluster 31: regulation of transcription from RNA polymerase II promoter
observed gene count: 16
expected gene count: 3.61206281227695
uncorrected p-value: 6.68676965071414e-07
GO ID	term	observed gene count	expected gene count	uncorrected p-value
GO:0006357	regulation of transcription from RNA polymerase II promoter	7	1.30782	0.000290502
GO:0045944	positive regulation of transcription from RNA polymerase II promoter	9	2.21083	0.000352573
Cluster 32: cell migration
observed gene count: 15
expected gene count: 3.36295503211991
uncorrected p-value: 1.35536905006719e-06
GO ID	term	observed gene count	expected gene count	uncorrected p-value
GO:0016477	cell migration	15	3.36296	1.35537e-06
Cluster 33: digestive tract morphogenesis
observed gene count: 6
expected gene count: 0.435938615274804
uncorrected p-value: 2.18475144507529e-06
GO ID	term	observed gene count	expected gene count	uncorrected p-value
GO:0048557	embryonic digestive tract morphogenesis	5	0.311385	6.42784e-06
GO:0048546	digestive tract morphogenesis	1	0.124554	0.11886
Cluster 34: regulation of multicellular organism growth
observed gene count: 28
expected gene count: 10.991880799429
uncorrected p-value: 7.36220808952541e-06
GO ID	term	observed gene count	expected gene count	uncorrected p-value
GO:0040018	positive regulation of multicellular organism growth	26	10.5248	2.60417e-05
GO:0040014	regulation of multicellular organism growth	3	0.747323	0.0374691
Cluster 35: female meiosis
observed gene count: 5
expected gene count: 0.467077087794433
uncorrected p-value: 6.72408698215933e-05
GO ID	term	observed gene count	expected gene count	uncorrected p-value
GO:0040038	polar body extrusion after meiotic divisions	4	0.373662	0.000379238
GO:0007143	female meiosis	1	0.0934154	0.0905388
Cluster 36: translational initiation
observed gene count: 6
expected gene count: 0.747323340471092
uncorrected p-value: 7.49423407887577e-05
GO ID	term	observed gene count	expected gene count	uncorrected p-value
GO:0006413	translational initiation	6	0.529354	8.30824e-06
Cluster 37: regulation of cell cycle
observed gene count: 5
expected gene count: 0.498215560314061
uncorrected p-value: 9.52949662324118e-05
GO ID	term	observed gene count	expected gene count	uncorrected p-value
GO:0007346	regulation of mitotic cell cycle	2	0.0934154	0.00284654
GO:0051726	regulation of cell cycle	3	0.4048	0.00681845
Cluster 38: cytokinesis, completion of separation
observed gene count: 3
expected gene count: 0.124553890078515
uncorrected p-value: 0.00011770799872645
GO ID	term	observed gene count	expected gene count	uncorrected p-value
GO:0007109	cytokinesis, completion of separation	3	0.124554	0.000117708
Cluster 39: kinetochore organization
observed gene count: 5
expected gene count: 0.591630977872948
uncorrected p-value: 0.000234679188268042
GO ID	term	observed gene count	expected gene count	uncorrected p-value
GO:0000070	mitotic sister chromatid segregation	5	0.591631	0.000234679
GO:0051383	kinetochore organization	2	0.0622769	0.000968932
Cluster 40: tRNA processing
observed gene count: 7
expected gene count: 1.52578515346181
uncorrected p-value: 0.000765704075240821
GO ID	term	observed gene count	expected gene count	uncorrected p-value
GO:0008033	tRNA processing	3	0.529354	0.0147787
GO:0043039	tRNA aminoacylation	2	0.249108	0.0239458
GO:0006418	tRNA aminoacylation for protein translation	3	0.903016	0.0603963
Cluster 41: collagen and cuticulin-based cuticle development
observed gene count: 10
expected gene count: 3.11384725196288
uncorrected p-value: 0.00113736145053303
GO ID	term	observed gene count	expected gene count	uncorrected p-value
GO:0040002	collagen and cuticulin-based cuticle development	10	3.08271	0.0010525
Cluster 42: chromatin modification
observed gene count: 4
expected gene count: 0.498215560314061
uncorrected p-value: 0.00126220026952724
GO ID	term	observed gene count	expected gene count	uncorrected p-value
GO:0006333	chromatin assembly or disassembly	2	0.0622769	0.000968932
GO:0016568	chromatin modification	2	0.186831	0.0133702
Cluster 43: nucleosome assembly
observed gene count: 9
expected gene count: 2.83360099928622
uncorrected p-value: 0.00213688874239203
GO ID	term	observed gene count	expected gene count	uncorrected p-value
GO:0006333	chromatin assembly or disassembly	2	0.0622769	0.000968932
GO:0006334	nucleosome assembly	7	2.77132	0.0211637
Cluster 44: negative regulation of multicellular organism growth
observed gene count: 9
expected gene count: 2.98929336188437
uncorrected p-value: 0.00308153624240643
GO ID	term	observed gene count	expected gene count	uncorrected p-value
GO:0040015	negative regulation of multicellular organism growth	9	2.98929	0.00308154
Cluster 45: positive regulation of embryonic development
observed gene count: 4
expected gene count: 0.778461812990721
uncorrected p-value: 0.00702356879572052
GO ID	term	observed gene count	expected gene count	uncorrected p-value
GO:0040019	positive regulation of embryonic development	4	0.685046	0.00437285
Cluster 46: protein amino acid phosphorylation
observed gene count: 23
expected gene count: 13.171573875803
uncorrected p-value: 0.00754584947215711
GO ID	term	observed gene count	expected gene count	uncorrected p-value
GO:0006468	protein amino acid phosphorylation	23	13.1093	0.00714878
Cluster 47: regulation of apoptosis
observed gene count: 4
expected gene count: 0.840738758029979
uncorrected p-value: 0.00927726203655894
GO ID	term	observed gene count	expected gene count	uncorrected p-value
GO:0008630	DNA damage response, signal transduction resulting in induction of apoptosis	1	0.124554	0.11886
GO:0043065	positive regulation of apoptosis	1	0.186831	0.172886
GO:0042981	regulation of apoptosis	1	0.186831	0.172886
GO:0043068	positive regulation of programmed cell death	1	0.311385	0.271209
Cluster 48: anterior/posterior pattern formation
observed gene count: 3
expected gene count: 0.498215560314061
uncorrected p-value: 0.0124547997262116
GO ID	term	observed gene count	expected gene count	uncorrected p-value
GO:0009952	anterior/posterior pattern formation	3	0.4048	0.00681845
Cluster 49: oocyte maturation
observed gene count: 4
expected gene count: 1.12098501070664
uncorrected p-value: 0.0250026082907944
GO ID	term	observed gene count	expected gene count	uncorrected p-value
GO:0001556	oocyte maturation	3	0.560493	0.0173305
GO:0048599	oocyte development	1	0.591631	0.451825
Cluster 50: synapsis
observed gene count: 1
expected gene count: 0.0311384725196288
uncorrected p-value: 0.0311384725196288
GO ID	term	observed gene count	expected gene count	uncorrected p-value
GO:0007129	synapsis	1	0.0311385	0.0311385
Cluster 51: negative regulation of Ras protein signal transduction
observed gene count: 3
expected gene count: 0.747323340471092
uncorrected p-value: 0.0374690504209384
GO ID	term	observed gene count	expected gene count	uncorrected p-value
GO:0046580	negative regulation of Ras protein signal transduction	3	0.280246	0.00219819
Cluster 52: glycolysis
observed gene count: 3
expected gene count: 0.747323340471092
uncorrected p-value: 0.0374690504209384
GO ID	term	observed gene count	expected gene count	uncorrected p-value
GO:0006096	glycolysis	2	0.342523	0.0442238
GO:0006006	glucose metabolic process	1	0.186831	0.172886
Cluster 53: nucleotide biosynthetic process
observed gene count: 4
expected gene count: 1.52578515346181
uncorrected p-value: 0.0657969203410436
GO ID	term	observed gene count	expected gene count	uncorrected p-value
GO:0015986	ATP synthesis coupled proton transport	3	0.529354	0.0147787
GO:0009165	nucleotide biosynthetic process	1	0.0934154	0.0905388
Cluster 54: cell redox homeostasis
observed gene count: 4
expected gene count: 1.52578515346181
uncorrected p-value: 0.0657969203410436
GO ID	term	observed gene count	expected gene count	uncorrected p-value
GO:0045454	cell redox homeostasis	4	1.43237	0.0544389
Cluster 55: histone modification
observed gene count: 1
expected gene count: 0.0934154175588865
uncorrected p-value: 0.0905387521527917
GO ID	term	observed gene count	expected gene count	uncorrected p-value
GO:0016570	histone modification	1	0.0311385	0.0311385
Cluster 56: phospholipid biosynthetic process
observed gene count: 2
expected gene count: 0.52935403283369
uncorrected p-value: 0.0968167709425565
GO ID	term	observed gene count	expected gene count	uncorrected p-value
GO:0008654	phospholipid biosynthetic process	2	0.373662	0.0519949
Cluster 57: cellular respiration
observed gene count: 2
expected gene count: 0.560492505353319
uncorrected p-value: 0.10675255306219
GO ID	term	observed gene count	expected gene count	uncorrected p-value
GO:0045333	cellular respiration	1	0.0622769	0.061308
GO:0006099	tricarboxylic acid cycle	1	0.4048	0.337207
Cluster 58: glycerol metabolic process
observed gene count: 1
expected gene count: 0.217969307637402
uncorrected p-value: 0.198644102884467
GO ID	term	observed gene count	expected gene count	uncorrected p-value
GO:0006071	glycerol metabolic process	1	0.217969	0.198644
Cluster 59: rRNA processing
observed gene count: 2
expected gene count: 0.871877230549607
uncorrected p-value: 0.216446700575662
GO ID	term	observed gene count	expected gene count	uncorrected p-value
GO:0006364	rRNA processing	2	0.498216	0.0871652
Cluster 60: synaptic transmission
observed gene count: 1
expected gene count: 0.435938615274804
uncorrected p-value: 0.357851290089846
GO ID	term	observed gene count	expected gene count	uncorrected p-value
GO:0007268	synaptic transmission	1	0.311385	0.271209
Cluster 61: mRNA transport
observed gene count: 12
expected gene count: 11.0852962169879
uncorrected p-value: 0.431092650473848
GO ID	term	observed gene count	expected gene count	uncorrected p-value
GO:0051028	mRNA transport	1	0.0311385	0.0311385
GO:0055085	transmembrane transport	11	11.023	0.545264
Cluster 62: cation transport
observed gene count: 4
expected gene count: 7.16184867951463
uncorrected p-value: 0.92987209914526
GO ID	term	observed gene count	expected gene count	uncorrected p-value
GO:0030001	metal ion transport	2	0.498216	0.0871652
GO:0006812	cation transport	2	1.77489	0.533484

## Sheet: EE_50-120
sample name: EE_50-120
number of associated genes in the sample: 1298
Cluster 1: growth
observed gene count: 439
expected gene count: 98.2069950035689
uncorrected p-value: 1.1601901230033e-171
GO ID	term	observed gene count	expected gene count	uncorrected p-value
GO:0009792	embryonic development ending in birth or egg hatching	418	85.1494	7.49033e-178
GO:0002119	nematode larval development	221	53.2437	1.02159e-74
GO:0040007	growth	174	44.0079	3.37248e-55
Cluster 2: hermaphrodite genitalia development
observed gene count: 132
expected gene count: 21.1063972162741
uncorrected p-value: 3.36533041978979e-65
GO ID	term	observed gene count	expected gene count	uncorrected p-value
GO:0040035	hermaphrodite genitalia development	132	20.8169	5.87274e-66
Cluster 3: meiosis
observed gene count: 64
expected gene count: 8.45413990007138
uncorrected p-value: 3.89504752077557e-37
GO ID	term	observed gene count	expected gene count	uncorrected p-value
GO:0045132	meiotic chromosome segregation	29	3.35849	2.93644e-19
GO:0007052	mitotic spindle organization	23	2.11353	4.90829e-18
GO:0007126	meiosis	25	3.44535	6.81917e-15
GO:0007059	chromosome segregation	5	0.405335	3.24946e-05
GO:0007017	microtubule-based process	4	0.723813	0.00544451
GO:0007049	cell cycle	3	0.463241	0.0102264
GO:0000226	microtubule cytoskeleton organization	2	0.23162	0.0208838
GO:0051321	meiotic cell cycle	1	0.0289525	0.0289525
Cluster 4: morphogenesis of an epithelium
observed gene count: 67
expected gene count: 10.7703426124197
uncorrected p-value: 2.94086621531682e-33
GO ID	term	observed gene count	expected gene count	uncorrected p-value
GO:0002009	morphogenesis of an epithelium	67	10.7124	2.08786e-33
Cluster 5: gene silencing
observed gene count: 43
expected gene count: 4.14021234832263
uncorrected p-value: 1.52881519432001e-31
GO ID	term	observed gene count	expected gene count	uncorrected p-value
GO:0016246	RNA interference	42	3.93754	2.2554e-31
GO:0016458	gene silencing	3	0.0868576	2.4215e-05
GO:0010629	negative regulation of gene expression	1	0.0868576	0.084369
Cluster 6: regulation of vulval development
observed gene count: 49
expected gene count: 5.76155424696645
uncorrected p-value: 3.04611371773629e-31
GO ID	term	observed gene count	expected gene count	uncorrected p-value
GO:0040027	negative regulation of vulval development	48	5.35622	9.12848e-32
GO:0040028	regulation of vulval development	1	0.521146	0.410771
Cluster 7: positive regulation of growth rate
observed gene count: 135
expected gene count: 43.7762312633833
uncorrected p-value: 3.41896815211962e-31
GO ID	term	observed gene count	expected gene count	uncorrected p-value
GO:0040010	positive regulation of growth rate	135	43.6894	2.79922e-31
Cluster 8: germ cell development
observed gene count: 37
expected gene count: 3.79278194147038
uncorrected p-value: 3.03459679209413e-26
GO ID	term	observed gene count	expected gene count	uncorrected p-value
GO:0007281	germ cell development	28	3.18478	7.17113e-19
GO:0042078	germ-line stem cell division	6	0.260573	4.53882e-08
GO:0008356	asymmetric cell division	6	0.434288	2.32847e-06
Cluster 9: determination of adult life span
observed gene count: 83
expected gene count: 23.5384100642398
uncorrected p-value: 3.7216580873745e-23
GO ID	term	observed gene count	expected gene count	uncorrected p-value
GO:0008340	determination of adult life span	83	23.5095	3.43501e-23
Cluster 10: apoptosis
observed gene count: 57
expected gene count: 13.8393112062812
uncorrected p-value: 2.16729963549205e-19
GO ID	term	observed gene count	expected gene count	uncorrected p-value
GO:0006915	apoptosis	50	12.189	4.21109e-17
GO:0012501	programmed cell death	3	0.405335	0.00693952
GO:0008219	cell death	5	1.56344	0.0198054
Cluster 11: gastrulation
observed gene count: 27
expected gene count: 2.8952533904354
uncorrected p-value: 5.6833179201713e-19
GO ID	term	observed gene count	expected gene count	uncorrected p-value
GO:0001703	gastrulation with mouth forming first	19	1.85296	1.31865e-14
GO:0048598	embryonic morphogenesis	6	0.955434	0.000329857
GO:0007369	gastrulation	2	0.0868576	0.00246444
Cluster 12: regulation of meiosis
observed gene count: 25
expected gene count: 2.86630085653105
uncorrected p-value: 6.52293344582781e-17
GO ID	term	observed gene count	expected gene count	uncorrected p-value
GO:0040020	regulation of meiosis	19	2.43201	2.88754e-12
GO:0051726	regulation of cell cycle	5	0.376383	2.1401e-05
GO:0045836	positive regulation of meiosis	2	0.0868576	0.00246444
Cluster 13: DNA repair
observed gene count: 27
expected gene count: 3.67697180585296
uncorrected p-value: 4.16042914899752e-16
GO ID	term	observed gene count	expected gene count	uncorrected p-value
GO:0006974	response to DNA damage stimulus	20	2.40306	2.14822e-13
GO:0006281	DNA repair	7	1.1002	9.65041e-05
GO:0033554	cellular response to stress	2	0.173715	0.0116267
GO:0006259	DNA metabolic process	2	0.376383	0.0528849
Cluster 14: regulation of transcription, DNA-dependent
observed gene count: 59
expected gene count: 17.6031406138473
uncorrected p-value: 8.29449489458184e-16
GO ID	term	observed gene count	expected gene count	uncorrected p-value
GO:0006355	regulation of transcription, DNA-dependent	59	17.6031	8.29449e-16
Cluster 15: gonad development
observed gene count: 26
expected gene count: 3.82173447537473
uncorrected p-value: 1.01509665892706e-14
GO ID	term	observed gene count	expected gene count	uncorrected p-value
GO:0008406	gonad development	26	3.82173	1.0151e-14
Cluster 16: mitosis
observed gene count: 20
expected gene count: 2.11353497501784
uncorrected p-value: 1.48548866110028e-14
GO ID	term	observed gene count	expected gene count	uncorrected p-value
GO:0007067	mitosis	12	1.47658	1.84547e-08
GO:0000070	mitotic sister chromatid segregation	8	0.550098	2.74911e-08
GO:0000087	M phase of mitotic cell cycle	2	0.144763	0.00790233
GO:0000280	nuclear division	1	0.0289525	0.0289525
Cluster 17: establishment of cell polarity
observed gene count: 18
expected gene count: 1.65029443254818
uncorrected p-value: 1.9414654858692e-14
GO ID	term	observed gene count	expected gene count	uncorrected p-value
GO:0000132	establishment of mitotic spindle orientation	13	0.810671	2.36716e-13
GO:0040001	establishment of mitotic spindle localization	3	0.202668	0.00077658
GO:0007163	establishment or maintenance of cell polarity	3	0.34743	0.00437929
GO:0030010	establishment of cell polarity	1	0.23162	0.209475
Cluster 18: oogenesis
observed gene count: 34
expected gene count: 8.07775695931478
uncorrected p-value: 2.12782857090749e-12
GO ID	term	observed gene count	expected gene count	uncorrected p-value
GO:0007276	gamete generation	15	2.46097	2.09724e-08
GO:0048477	oogenesis	18	5.44308	1.02487e-05
GO:0048609	reproductive process in a multicellular organism	1	0.144763	0.136625
Cluster 19: DNA replication initiation
observed gene count: 7
expected gene count: 0.231620271234832
uncorrected p-value: 1.3091112584223e-10
GO ID	term	observed gene count	expected gene count	uncorrected p-value
GO:0006270	DNA replication initiation	7	0.202668	1.67869e-11
Cluster 20: proteolysis
observed gene count: 40
expected gene count: 14.6210296216988
uncorrected p-value: 1.35228589010329e-08
GO ID	term	observed gene count	expected gene count	uncorrected p-value
GO:0006511	ubiquitin-dependent protein catabolic process	16	2.14249	3.08835e-10
GO:0030163	protein catabolic process	10	3.64802	0.0037333
GO:0051603	proteolysis involved in cellular protein catabolic process	2	0.405335	0.0605424
GO:0006508	proteolysis	14	8.88843	0.0648214
Cluster 21: RNA processing
observed gene count: 12
expected gene count: 1.47657922912206
uncorrected p-value: 1.84547416013238e-08
GO ID	term	observed gene count	expected gene count	uncorrected p-value
GO:0006396	RNA processing	9	0.926481	2.13888e-07
GO:0006397	mRNA processing	3	0.434288	0.00848955
Cluster 22: fertilization
observed gene count: 16
expected gene count: 2.8952533904354
uncorrected p-value: 3.05264178938865e-08
GO ID	term	observed gene count	expected gene count	uncorrected p-value
GO:0035046	pronuclear migration	13	1.50553	2.10547e-09
GO:0051258	protein polymerization	4	0.492193	0.00123099
GO:0007018	microtubule-based movement	4	0.781718	0.00721609
GO:0051647	nucleus localization	1	0.0289525	0.0289525
GO:0009566	fertilization	1	0.0579051	0.0570674
Cluster 23: kinetochore organization
observed gene count: 8
expected gene count: 0.636955745895789
uncorrected p-value: 1.07641003228948e-07
GO ID	term	observed gene count	expected gene count	uncorrected p-value
GO:0000070	mitotic sister chromatid segregation	8	0.550098	2.74911e-08
GO:0051383	kinetochore organization	2	0.0579051	0.000837622
Cluster 24: centrosome cycle
observed gene count: 5
expected gene count: 0.202667737330478
uncorrected p-value: 4.03899650245688e-07
GO ID	term	observed gene count	expected gene count	uncorrected p-value
GO:0007099	centriole replication	4	0.144763	3.41679e-06
GO:0007098	centrosome cycle	2	0.0868576	0.00246444
Cluster 25: digestive tract morphogenesis
observed gene count: 6
expected gene count: 0.405335474660956
uncorrected p-value: 1.43232024023e-06
GO ID	term	observed gene count	expected gene count	uncorrected p-value
GO:0048557	embryonic digestive tract morphogenesis	5	0.289525	4.50631e-06
GO:0048546	digestive tract morphogenesis	1	0.11581	0.110881
Cluster 26: spermatogenesis
observed gene count: 9
expected gene count: 1.15810135617416
uncorrected p-value: 1.69304101506656e-06
GO ID	term	observed gene count	expected gene count	uncorrected p-value
GO:0042006	masculinization of hermaphroditic germ-line	4	0.34743	0.000287414
GO:0007283	spermatogenesis	5	0.781718	0.000958298
GO:0007530	sex determination	2	0.0868576	0.00246444
GO:0018992	germ-line sex determination	1	0.0579051	0.0570674
GO:0040021	hermaphrodite germ-line sex determination	1	0.0868576	0.084369
Cluster 27: protein ubiquitination
observed gene count: 6
expected gene count: 0.463240542469665
uncorrected p-value: 3.63393918794772e-06
GO ID	term	observed gene count	expected gene count	uncorrected p-value
GO:0016567	protein ubiquitination	6	0.463241	3.63394e-06
Cluster 28: oviposition
observed gene count: 26
expected gene count: 9.58328872234119
uncorrected p-value: 5.16635421807835e-06
GO ID	term	observed gene count	expected gene count	uncorrected p-value
GO:0018991	oviposition	25	9.23586	8.09603e-06
GO:0048609	reproductive process in a multicellular organism	1	0.144763	0.136625
Cluster 29: transcription initiation
observed gene count: 10
expected gene count: 1.73715203426124
uncorrected p-value: 8.08803392125813e-06
GO ID	term	observed gene count	expected gene count	uncorrected p-value
GO:0006352	transcription initiation	5	0.34743	1.34926e-05
GO:0006351	transcription, DNA-dependent	4	0.984386	0.0162636
GO:0006366	transcription from RNA polymerase II promoter	2	0.376383	0.0528849
Cluster 30: RNA catabolic process
observed gene count: 6
expected gene count: 0.550098144182727
uncorrected p-value: 1.14270071197689e-05
GO ID	term	observed gene count	expected gene count	uncorrected p-value
GO:0000184	nuclear-transcribed mRNA catabolic process, nonsense-mediated decay	4	0.202668	2.28272e-05
GO:0006401	RNA catabolic process	2	0.144763	0.00790233
Cluster 31: protein amino acid phosphorylation
observed gene count: 29
expected gene count: 12.2469218415418
uncorrected p-value: 2.06443520906138e-05
GO ID	term	observed gene count	expected gene count	uncorrected p-value
GO:0006468	protein amino acid phosphorylation	29	12.189	1.89193e-05
Cluster 32: nuclear import
observed gene count: 16
expected gene count: 4.71926302640971
uncorrected p-value: 2.29669277275167e-05
GO ID	term	observed gene count	expected gene count	uncorrected p-value
GO:0008104	protein localization	6	0.897529	0.000230369
GO:0006913	nucleocytoplasmic transport	2	0.144763	0.00790233
GO:0006886	intracellular protein transport	5	1.73715	0.029733
GO:0051170	nuclear import	1	0.0579051	0.0570674
GO:0046907	intracellular transport	1	0.11581	0.110881
GO:0033365	protein localization in organelle	1	0.23162	0.209475
GO:0015031	protein transport	1	1.65029	0.812826
Cluster 33: cell migration
observed gene count: 12
expected gene count: 3.12687366167024
uncorrected p-value: 7.13911433328669e-05
GO ID	term	observed gene count	expected gene count	uncorrected p-value
GO:0016477	cell migration	12	3.12687	7.13911e-05
Cluster 34: molting cycle, collagen and cuticulin-based cuticle
observed gene count: 20
expected gene count: 7.75927908636688
uncorrected p-value: 0.000122516466267518
GO ID	term	observed gene count	expected gene count	uncorrected p-value
GO:0018996	molting cycle, collagen and cuticulin-based cuticle	20	7.75928	0.000122516
Cluster 35: cell fate determination
observed gene count: 6
expected gene count: 1.04229122055675
uncorrected p-value: 0.000538776529390586
GO ID	term	observed gene count	expected gene count	uncorrected p-value
GO:0045167	asymmetric protein localization involved in cell fate determination	4	0.521146	0.00154663
GO:0001709	cell fate determination	1	0.144763	0.136625
GO:0008105	asymmetric protein localization	1	0.405335	0.337265
Cluster 36: negative regulation of gene expression
observed gene count: 4
expected gene count: 0.405335474660956
uncorrected p-value: 0.00055490083458797
GO ID	term	observed gene count	expected gene count	uncorrected p-value
GO:0045892	negative regulation of transcription, DNA-dependent	3	0.289525	0.00249444
GO:0010629	negative regulation of gene expression	1	0.0868576	0.084369
Cluster 37: collagen and cuticulin-based cuticle development
observed gene count: 10
expected gene count: 2.8952533904354
uncorrected p-value: 0.000655582593588829
GO ID	term	observed gene count	expected gene count	uncorrected p-value
GO:0040002	collagen and cuticulin-based cuticle development	10	2.8663	0.000605496
Cluster 38: positive regulation of embryonic development
observed gene count: 5
expected gene count: 0.723813347608851
uncorrected p-value: 0.000661641963097362
GO ID	term	observed gene count	expected gene count	uncorrected p-value
GO:0040019	positive regulation of embryonic development	5	0.636956	0.000352441
Cluster 39: female meiosis
observed gene count: 4
expected gene count: 0.43428800856531
uncorrected p-value: 0.000739381967865994
GO ID	term	observed gene count	expected gene count	uncorrected p-value
GO:0040038	polar body extrusion after meiotic divisions	3	0.34743	0.00437929
GO:0007143	female meiosis	1	0.0868576	0.084369
Cluster 40: nucleosome assembly
observed gene count: 9
expected gene count: 2.63468058529622
uncorrected p-value: 0.00130172999779038
GO ID	term	observed gene count	expected gene count	uncorrected p-value
GO:0006334	nucleosome assembly	9	2.57678	0.00111112
Cluster 41: histone modification
observed gene count: 3
expected gene count: 0.260572805139186
uncorrected p-value: 0.00178442903059616
GO ID	term	observed gene count	expected gene count	uncorrected p-value
GO:0016568	chromatin modification	2	0.173715	0.0116267
GO:0016570	histone modification	1	0.0289525	0.0289525
Cluster 42: glycolysis
observed gene count: 4
expected gene count: 0.694860813704497
uncorrected p-value: 0.0046792524737476
GO ID	term	observed gene count	expected gene count	uncorrected p-value
GO:0006006	glucose metabolic process	2	0.173715	0.0116267
GO:0019318	hexose metabolic process	1	0.0579051	0.0570674
GO:0006096	glycolysis	1	0.318478	0.276182
Cluster 43: positive regulation of transcription, DNA-dependent
observed gene count: 7
expected gene count: 2.25829764453961
uncorrected p-value: 0.00744814959103272
GO ID	term	observed gene count	expected gene count	uncorrected p-value
GO:0045944	positive regulation of transcription from RNA polymerase II promoter	6	2.05563	0.0169044
GO:0045893	positive regulation of transcription, DNA-dependent	1	0.173715	0.161625
Cluster 44: positive regulation of multicellular organism growth
observed gene count: 19
expected gene count: 10.220244468237
uncorrected p-value: 0.00772487320023382
GO ID	term	observed gene count	expected gene count	uncorrected p-value
GO:0040018	positive regulation of multicellular organism growth	19	9.78596	0.00493816
Cluster 45: cell redox homeostasis
observed gene count: 5
expected gene count: 1.41867416131335
uncorrected p-value: 0.0134282321552901
GO ID	term	observed gene count	expected gene count	uncorrected p-value
GO:0045454	cell redox homeostasis	5	1.33182	0.0103593
Cluster 46: synapsis
observed gene count: 1
expected gene count: 0.028952533904354
uncorrected p-value: 0.028952533904354
GO ID	term	observed gene count	expected gene count	uncorrected p-value
GO:0007129	synapsis	1	0.0289525	0.0289525
Cluster 47: primary microRNA processing
observed gene count: 1
expected gene count: 0.0868576017130621
uncorrected p-value: 0.0843689504011997
GO ID	term	observed gene count	expected gene count	uncorrected p-value
GO:0031053	primary microRNA processing	1	0.0289525	0.0289525
Cluster 48: oocyte maturation
observed gene count: 3
expected gene count: 1.04229122055675
uncorrected p-value: 0.0854378807081384
GO ID	term	observed gene count	expected gene count	uncorrected p-value
GO:0001556	oocyte maturation	3	0.521146	0.0142754
Cluster 49: tRNA processing
observed gene count: 2
expected gene count: 0.492193076374019
uncorrected p-value: 0.0855130951356038
GO ID	term	observed gene count	expected gene count	uncorrected p-value
GO:0008033	tRNA processing	2	0.492193	0.0855131
Cluster 50: endocytosis
observed gene count: 4
expected gene count: 1.99772483940043
uncorrected p-value: 0.139636877733264
GO ID	term	observed gene count	expected gene count	uncorrected p-value
GO:0006897	endocytosis	2	0.434288	0.0685506
GO:0016192	vesicle-mediated transport	2	1.50553	0.446596
Cluster 51: negative regulation of Ras protein signal transduction
observed gene count: 2
expected gene count: 0.694860813704497
uncorrected p-value: 0.152386920282316
GO ID	term	observed gene count	expected gene count	uncorrected p-value
GO:0046580	negative regulation of Ras protein signal transduction	2	0.260573	0.0263408
Cluster 52: negative regulation of multicellular organism growth
observed gene count: 4
expected gene count: 2.77944325481799
uncorrected p-value: 0.302689839783412
GO ID	term	observed gene count	expected gene count	uncorrected p-value
GO:0040015	negative regulation of multicellular organism growth	4	2.77944	0.30269
Cluster 53: cation transport
observed gene count: 4
expected gene count: 7.03546573875803
uncorrected p-value: 0.923606590906185
GO ID	term	observed gene count	expected gene count	uncorrected p-value
GO:0030001	metal ion transport	3	0.463241	0.0102264
GO:0006812	cation transport	2	1.65029	0.494315
Cluster 54: sensory perception of chemical stimulus
observed gene count: 2
expected gene count: 5.24040863668808
uncorrected p-value: 0.968862998445508
GO ID	term	observed gene count	expected gene count	uncorrected p-value
GO:0007606	sensory perception of chemical stimulus	2	5.24041	0.968863

## Sheet: EE_50-150
sample name: EE_50-150
number of associated genes in the sample: 2445
Cluster 1: growth
observed gene count: 627
expected gene count: 206.367773019272
uncorrected p-value: 9.25538768977774e-153
GO ID	term	observed gene count	expected gene count	uncorrected p-value
GO:0009792	embryonic development ending in birth or egg hatching	520	160.393	5.38511e-136
GO:0040007	growth	291	82.8961	1.0251e-81
GO:0002119	nematode larval development	324	100.293	1.24261e-81
GO:0040010	positive regulation of growth rate	277	82.2962	1.90325e-73
GO:0009791	post-embryonic development	3	0.872591	0.0532672
GO:0002164	larval development	1	0.0545369	0.0545369
GO:0045927	positive regulation of growth	1	0.0545369	0.0545369
Cluster 2: sex differentiation
observed gene count: 145
expected gene count: 39.7574277301927
uncorrected p-value: 1.43709648735701e-42
GO ID	term	observed gene count	expected gene count	uncorrected p-value
GO:0040035	hermaphrodite genitalia development	144	39.2121	1.203e-42
GO:0007548	sex differentiation	1	0.599906	0.460415
Cluster 3: transcription initiation
observed gene count: 27
expected gene count: 3.87212259100642
uncorrected p-value: 1.90328994057527e-16
GO ID	term	observed gene count	expected gene count	uncorrected p-value
GO:0006351	transcription, DNA-dependent	16	1.85426	5.0277e-12
GO:0006367	transcription initiation from RNA polymerase II promoter	8	0.654443	3.14381e-08
GO:0006352	transcription initiation	2	0.654443	0.136636
GO:0006366	transcription from RNA polymerase II promoter	1	0.70898	0.517679
Cluster 4: epithelium development
observed gene count: 61
expected gene count: 20.2877408993576
uncorrected p-value: 1.54829980353199e-14
GO ID	term	observed gene count	expected gene count	uncorrected p-value
GO:0002009	morphogenesis of an epithelium	60	20.1787	4.2144e-14
GO:0060429	epithelium development	1	0.0545369	0.0545369
Cluster 5: oocyte development
observed gene count: 33
expected gene count: 6.98072805139186
uncorrected p-value: 4.40573509303529e-14
GO ID	term	observed gene count	expected gene count	uncorrected p-value
GO:0007281	germ cell development	31	5.99906	1.80564e-14
GO:0048599	oocyte development	2	1.0362	0.27784
Cluster 6: determination of adult life span
observed gene count: 93
expected gene count: 44.3385305139186
uncorrected p-value: 1.57547095170886e-11
GO ID	term	observed gene count	expected gene count	uncorrected p-value
GO:0008340	determination of adult life span	93	44.284	1.47247e-11
Cluster 7: RNA processing
observed gene count: 22
expected gene count: 4.03573340471092
uncorrected p-value: 3.41901715862823e-11
GO ID	term	observed gene count	expected gene count	uncorrected p-value
GO:0008033	tRNA processing	7	0.927128	1.7029e-05
GO:0042254	ribosome biogenesis	5	0.654443	0.000275402
GO:0006396	RNA processing	7	1.74518	0.00143345
GO:0006364	rRNA processing	4	0.872591	0.00946763
Cluster 8: negative regulation of vulval development
observed gene count: 37
expected gene count: 10.8528506423983
uncorrected p-value: 5.4618877298176e-11
GO ID	term	observed gene count	expected gene count	uncorrected p-value
GO:0040027	negative regulation of vulval development	37	10.0893	5.81182e-12
Cluster 9: meiosis
observed gene count: 35
expected gene count: 10.9619245182013
uncorrected p-value: 1.1267095321648e-09
GO ID	term	observed gene count	expected gene count	uncorrected p-value
GO:0045132	meiotic chromosome segregation	20	6.32628	4.54001e-06
GO:0007126	meiosis	18	6.4899	8.10397e-05
GO:0007049	cell cycle	5	0.872591	0.00126432
GO:0007059	chromosome segregation	2	0.763517	0.175625
Cluster 10: apoptosis
observed gene count: 59
expected gene count: 26.0686563169165
uncorrected p-value: 5.0107657137335e-09
GO ID	term	observed gene count	expected gene count	uncorrected p-value
GO:0006915	apoptosis	51	22.9601	9.71556e-08
GO:0008219	cell death	8	2.94499	0.00855862
GO:0012501	programmed cell death	3	0.763517	0.0375272
Cluster 11: oogenesis
observed gene count: 40
expected gene count: 14.6704362955032
uncorrected p-value: 8.90152015362704e-09
GO ID	term	observed gene count	expected gene count	uncorrected p-value
GO:0048477	oogenesis	28	10.2529	1.37273e-06
GO:0007276	gamete generation	12	4.63564	0.00218568
Cluster 12: regulation of transcription, DNA-dependent
observed gene count: 68
expected gene count: 33.1584582441114
uncorrected p-value: 2.01328001079767e-08
GO ID	term	observed gene count	expected gene count	uncorrected p-value
GO:0006355	regulation of transcription, DNA-dependent	68	33.1585	2.01328e-08
Cluster 13: positive regulation of embryonic development
observed gene count: 11
expected gene count: 1.36342344753747
uncorrected p-value: 2.71461468821855e-08
GO ID	term	observed gene count	expected gene count	uncorrected p-value
GO:0040019	positive regulation of embryonic development	10	1.19981	8.06641e-08
GO:0051094	positive regulation of developmental process	1	0.0545369	0.0545369
Cluster 14: oviposition
observed gene count: 44
expected gene count: 18.0517264453961
uncorrected p-value: 5.07669411747388e-08
GO ID	term	observed gene count	expected gene count	uncorrected p-value
GO:0018991	oviposition	43	17.3973	4.7869e-08
GO:0032504	multicellular organism reproduction	1	0.381759	0.324695
Cluster 15: RNA interference
observed gene count: 26
expected gene count: 7.79878211991435
uncorrected p-value: 6.00694611231851e-08
GO ID	term	observed gene count	expected gene count	uncorrected p-value
GO:0016246	RNA interference	25	7.41702	8.56964e-08
GO:0010608	posttranscriptional regulation of gene expression	1	0.163611	0.154853
Cluster 16: gonad development
observed gene count: 24
expected gene count: 7.19887580299786
uncorrected p-value: 1.90827160645371e-07
GO ID	term	observed gene count	expected gene count	uncorrected p-value
GO:0008406	gonad development	24	7.19888	1.90827e-07
Cluster 17: protein transport
observed gene count: 25
expected gene count: 8.07146680942184
uncorrected p-value: 4.6112143165586e-07
GO ID	term	observed gene count	expected gene count	uncorrected p-value
GO:0015031	protein transport	16	3.10861	3.98743e-08
GO:0006886	intracellular protein transport	9	3.27222	0.00500556
GO:0046907	intracellular transport	1	0.218148	0.200948
GO:0008104	protein localization	1	1.69065	0.82432
Cluster 18: embryonic morphogenesis
observed gene count: 19
expected gene count: 5.45369379014989
uncorrected p-value: 1.74946603319283e-06
GO ID	term	observed gene count	expected gene count	uncorrected p-value
GO:0001703	gastrulation with mouth forming first	15	3.49036	1.35222e-06
GO:0048598	embryonic morphogenesis	4	1.79972	0.103082
Cluster 19: cell migration
observed gene count: 19
expected gene count: 5.88998929336188
uncorrected p-value: 5.74674265550732e-06
GO ID	term	observed gene count	expected gene count	uncorrected p-value
GO:0016477	cell migration	19	5.88999	5.74674e-06
Cluster 20: protein processing
observed gene count: 6
expected gene count: 0.599906316916488
uncorrected p-value: 9.52292031404439e-06
GO ID	term	observed gene count	expected gene count	uncorrected p-value
GO:0006465	signal peptide processing	4	0.218148	8.82582e-06
GO:0016485	protein processing	2	0.218148	0.0165691
Cluster 21: regulation of multicellular organism growth
observed gene count: 40
expected gene count: 19.2515390792291
uncorrected p-value: 1.12548177148182e-05
GO ID	term	observed gene count	expected gene count	uncorrected p-value
GO:0040018	positive regulation of multicellular organism growth	38	18.4335	2.1933e-05
GO:0040014	regulation of multicellular organism growth	5	1.30889	0.00855355
Cluster 22: cellular homeostasis
observed gene count: 11
expected gene count: 2.67230995717345
uncorrected p-value: 5.2741779077968e-05
GO ID	term	observed gene count	expected gene count	uncorrected p-value
GO:0045454	cell redox homeostasis	10	2.5087	0.000152809
GO:0019725	cellular homeostasis	1	0.109074	0.106101
Cluster 23: RNA splicing
observed gene count: 7
expected gene count: 1.09073875802998
uncorrected p-value: 5.87190276005084e-05
GO ID	term	observed gene count	expected gene count	uncorrected p-value
GO:0006397	mRNA processing	6	0.818054	8.53358e-05
GO:0008380	RNA splicing	1	0.109074	0.106101
Cluster 24: nuclear mRNA splicing, via spliceosome
observed gene count: 7
expected gene count: 1.09073875802998
uncorrected p-value: 5.87190276005084e-05
GO ID	term	observed gene count	expected gene count	uncorrected p-value
GO:0000398	nuclear mRNA splicing, via spliceosome	7	1.09074	5.8719e-05
Cluster 25: exocytosis
observed gene count: 15
expected gene count: 4.79925053533191
uncorrected p-value: 7.82970239565296e-05
GO ID	term	observed gene count	expected gene count	uncorrected p-value
GO:0032940	secretion by cell	14	4.09027	4.80028e-05
GO:0048278	vesicle docking	1	0.0545369	0.0545369
GO:0006887	exocytosis	1	0.218148	0.200948
Cluster 26: molting cycle
observed gene count: 30
expected gene count: 14.6158993576017
uncorrected p-value: 0.000164336517203131
GO ID	term	observed gene count	expected gene count	uncorrected p-value
GO:0018996	molting cycle, collagen and cuticulin-based cuticle	30	14.6159	0.000164337
GO:0042303	molting cycle	1	0.0545369	0.0545369
Cluster 27: methylation
observed gene count: 7
expected gene count: 1.36342344753747
uncorrected p-value: 0.000286218393248493
GO ID	term	observed gene count	expected gene count	uncorrected p-value
GO:0001510	RNA methylation	3	0.272685	0.00149069
GO:0032259	methylation	3	0.327222	0.00286028
GO:0006479	protein amino acid methylation	3	0.763517	0.0375272
Cluster 28: nucleocytoplasmic transport
observed gene count: 14
expected gene count: 5.0173982869379
uncorrected p-value: 0.000453746396835302
GO ID	term	observed gene count	expected gene count	uncorrected p-value
GO:0007264	small GTPase mediated signal transduction	14	4.96286	0.000404743
GO:0006913	nucleocytoplasmic transport	1	0.272685	0.24453
Cluster 29: DNA repair
observed gene count: 17
expected gene count: 6.92619111349036
uncorrected p-value: 0.000555137463410467
GO ID	term	observed gene count	expected gene count	uncorrected p-value
GO:0006281	DNA repair	7	2.0724	0.00404032
GO:0006259	DNA metabolic process	3	0.70898	0.0307031
GO:0006974	response to DNA damage stimulus	9	4.52657	0.0368244
GO:0033554	cellular response to stress	1	0.327222	0.285736
Cluster 30: fertilization
observed gene count: 11
expected gene count: 3.70851177730193
uncorrected p-value: 0.00107234310571555
GO ID	term	observed gene count	expected gene count	uncorrected p-value
GO:0035046	pronuclear migration	10	2.83592	0.000440148
GO:0009566	fertilization	1	0.109074	0.106101
GO:0007097	nuclear migration	1	0.327222	0.285736
Cluster 31: lipoprotein metabolic process
observed gene count: 7
expected gene count: 2.12694057815846
uncorrected p-value: 0.00469622645481125
GO ID	term	observed gene count	expected gene count	uncorrected p-value
GO:0006506	GPI anchor biosynthetic process	4	0.599906	0.00213629
GO:0042157	lipoprotein metabolic process	1	0.109074	0.106101
GO:0046474	glycerophospholipid biosynthetic process	1	0.381759	0.324695
GO:0008654	phospholipid biosynthetic process	1	0.654443	0.48985
Cluster 32: negative regulation of multicellular organism growth
observed gene count: 12
expected gene count: 5.2355460385439
uncorrected p-value: 0.00600057469024036
GO ID	term	observed gene count	expected gene count	uncorrected p-value
GO:0040015	negative regulation of multicellular organism growth	12	5.23555	0.00600057
Cluster 33: nucleus organization
observed gene count: 7
expected gene count: 2.29055139186296
uncorrected p-value: 0.00714775155963963
GO ID	term	observed gene count	expected gene count	uncorrected p-value
GO:0006309	DNA fragmentation involved in apoptosis	3	0.599906	0.0192138
GO:0000737	DNA catabolic process, endonucleolytic	2	0.327222	0.0385019
GO:0006997	nucleus organization	4	1.63611	0.0782896
Cluster 34: ubiquinone biosynthetic process
observed gene count: 3
expected gene count: 0.436295503211991
uncorrected p-value: 0.00737401315996694
GO ID	term	observed gene count	expected gene count	uncorrected p-value
GO:0006744	ubiquinone biosynthetic process	3	0.436296	0.00737401
Cluster 35: cell growth
observed gene count: 3
expected gene count: 0.436295503211991
uncorrected p-value: 0.00737401315996694
GO ID	term	observed gene count	expected gene count	uncorrected p-value
GO:0016049	cell growth	2	0.109074	0.00297313
GO:0008361	regulation of cell size	1	0.327222	0.285736
Cluster 36: chromatin modification
observed gene count: 4
expected gene count: 0.872591006423983
uncorrected p-value: 0.00946763283750467
GO ID	term	observed gene count	expected gene count	uncorrected p-value
GO:0016568	chromatin modification	2	0.327222	0.0385019
GO:0006333	chromatin assembly or disassembly	1	0.109074	0.106101
GO:0051276	chromosome organization	1	0.436296	0.361529
Cluster 37: proteolysis
observed gene count: 40
expected gene count: 27.541153640257
uncorrected p-value: 0.0122764110378026
GO ID	term	observed gene count	expected gene count	uncorrected p-value
GO:0006511	ubiquitin-dependent protein catabolic process	21	4.03573	2.50262e-10
GO:0044257	cellular protein catabolic process	1	0.0545369	0.0545369
GO:0030163	protein catabolic process	7	6.87165	0.53489
GO:0006508	proteolysis	13	16.7428	0.859558
Cluster 38: protein targeting
observed gene count: 5
expected gene count: 1.47249732334047
uncorrected p-value: 0.0141933664171692
GO ID	term	observed gene count	expected gene count	uncorrected p-value
GO:0007005	mitochondrion organization	2	0.490832	0.0829179
GO:0045039	protein import into mitochondrial inner membrane	1	0.109074	0.106101
GO:0006626	protein targeting to mitochondrion	1	0.109074	0.106101
GO:0006605	protein targeting	1	0.163611	0.154853
Cluster 39: collagen and cuticulin-based cuticle development
observed gene count: 11
expected gene count: 5.45369379014989
uncorrected p-value: 0.0204414959423703
GO ID	term	observed gene count	expected gene count	uncorrected p-value
GO:0040002	collagen and cuticulin-based cuticle development	11	5.39916	0.0191032
Cluster 40: microtubule-based process
observed gene count: 11
expected gene count: 5.88998929336188
uncorrected p-value: 0.0337359735889839
GO ID	term	observed gene count	expected gene count	uncorrected p-value
GO:0000226	microtubule cytoskeleton organization	3	0.436296	0.00737401
GO:0007052	mitotic spindle organization	6	3.9812	0.207253
GO:0007017	microtubule-based process	2	1.36342	0.399034
Cluster 41: embryonic digestive tract morphogenesis
observed gene count: 3
expected gene count: 0.763517130620985
uncorrected p-value: 0.0375271919013882
GO ID	term	observed gene count	expected gene count	uncorrected p-value
GO:0048557	embryonic digestive tract morphogenesis	3	0.545369	0.0145563
Cluster 42: protein amino acid deacetylation
observed gene count: 3
expected gene count: 0.872591006423983
uncorrected p-value: 0.0532672092290137
GO ID	term	observed gene count	expected gene count	uncorrected p-value
GO:0006476	protein amino acid deacetylation	1	0.0545369	0.0545369
GO:0045892	negative regulation of transcription, DNA-dependent	2	0.545369	0.100008
Cluster 43: regulation of actin filament polymerization
observed gene count: 3
expected gene count: 0.981664882226981
uncorrected p-value: 0.0716508120189456
GO ID	term	observed gene count	expected gene count	uncorrected p-value
GO:0030833	regulation of actin filament polymerization	3	0.381759	0.00480273
Cluster 44: cellular respiration
observed gene count: 1
expected gene count: 0.109073875802998
uncorrected p-value: 0.106100748363698
GO ID	term	observed gene count	expected gene count	uncorrected p-value
GO:0045333	cellular respiration	1	0.109074	0.106101
Cluster 45: nucleotide biosynthetic process
observed gene count: 1
expected gene count: 0.163610813704497
uncorrected p-value: 0.154853451246829
GO ID	term	observed gene count	expected gene count	uncorrected p-value
GO:0009165	nucleotide biosynthetic process	1	0.163611	0.154853
Cluster 46: nucleotide biosynthetic process
observed gene count: 1
expected gene count: 0.163610813704497
uncorrected p-value: 0.154853451246829
GO ID	term	observed gene count	expected gene count	uncorrected p-value
GO:0009165	nucleotide biosynthetic process	1	0.163611	0.154853
Cluster 47: mitosis
observed gene count: 5
expected gene count: 3.10860546038544
uncorrected p-value: 0.198744491622444
GO ID	term	observed gene count	expected gene count	uncorrected p-value
GO:0007067	mitosis	5	2.78138	0.143942
GO:0000087	M phase of mitotic cell cycle	1	0.272685	0.24453
Cluster 48: fatty acid metabolic process
observed gene count: 3
expected gene count: 1.79971895074946
uncorrected p-value: 0.267674283981425
GO ID	term	observed gene count	expected gene count	uncorrected p-value
GO:0006633	fatty acid biosynthetic process	2	0.818054	0.195712
GO:0006631	fatty acid metabolic process	1	0.927128	0.614627
Cluster 49: tRNA aminoacylation
observed gene count: 3
expected gene count: 1.79971895074946
uncorrected p-value: 0.267674283981425
GO ID	term	observed gene count	expected gene count	uncorrected p-value
GO:0006418	tRNA aminoacylation for protein translation	3	1.58157	0.208705
GO:0043039	tRNA aminoacylation	1	0.436296	0.361529
Cluster 50: posttranscriptional regulation of gene expression
observed gene count: 1
expected gene count: 0.381758565310493
uncorrected p-value: 0.324694591304228
GO ID	term	observed gene count	expected gene count	uncorrected p-value
GO:0010608	posttranscriptional regulation of gene expression	1	0.163611	0.154853
Cluster 51: establishment of mitotic spindle localization
observed gene count: 1
expected gene count: 0.381758565310493
uncorrected p-value: 0.324694591304228
GO ID	term	observed gene count	expected gene count	uncorrected p-value
GO:0040001	establishment of mitotic spindle localization	1	0.381759	0.324695
Cluster 52: Mo-molybdopterin cofactor biosynthetic process
observed gene count: 1
expected gene count: 0.436295503211991
uncorrected p-value: 0.361529431778542
GO ID	term	observed gene count	expected gene count	uncorrected p-value
GO:0006777	Mo-molybdopterin cofactor biosynthetic process	1	0.381759	0.324695
Cluster 53: regulation of apoptosis
observed gene count: 1
expected gene count: 0.436295503211991
uncorrected p-value: 0.361529431778542
GO ID	term	observed gene count	expected gene count	uncorrected p-value
GO:0042981	regulation of apoptosis	1	0.327222	0.285736
Cluster 54: nucleotide biosynthetic process
observed gene count: 1
expected gene count: 0.49083244111349
uncorrected p-value: 0.396355876078504
GO ID	term	observed gene count	expected gene count	uncorrected p-value
GO:0009165	nucleotide biosynthetic process	1	0.163611	0.154853
Cluster 55: positive regulation of transcription from RNA polymerase II promoter
observed gene count: 5
expected gene count: 4.25388115631692
uncorrected p-value: 0.42202002816243
GO ID	term	observed gene count	expected gene count	uncorrected p-value
GO:0045944	positive regulation of transcription from RNA polymerase II promoter	5	3.87212	0.345406
Cluster 56: embryonic pattern specification
observed gene count: 2
expected gene count: 1.47249732334047
uncorrected p-value: 0.437433339973189
GO ID	term	observed gene count	expected gene count	uncorrected p-value
GO:0009880	embryonic pattern specification	2	0.654443	0.136636
GO:0009952	anterior/posterior pattern formation	1	0.70898	0.517679
Cluster 57: sensory perception of chemical stimulus
observed gene count: 10
expected gene count: 9.87118576017131
uncorrected p-value: 0.529171783307189
GO ID	term	observed gene count	expected gene count	uncorrected p-value
GO:0007606	sensory perception of chemical stimulus	10	9.87119	0.529172
Cluster 58: synaptic transmission
observed gene count: 1
expected gene count: 0.763517130620985
uncorrected p-value: 0.543991363768477
GO ID	term	observed gene count	expected gene count	uncorrected p-value
GO:0007268	synaptic transmission	1	0.545369	0.429283
Cluster 59: regulation of nuclear division
observed gene count: 1
expected gene count: 1.09073875802998
uncorrected p-value: 0.674324472988567
GO ID	term	observed gene count	expected gene count	uncorrected p-value
GO:0051783	regulation of nuclear division	1	0.163611	0.154853
Cluster 60: protein amino acid phosphorylation
observed gene count: 21
expected gene count: 23.069124732334
uncorrected p-value: 0.70213119262644
GO ID	term	observed gene count	expected gene count	uncorrected p-value
GO:0006468	protein amino acid phosphorylation	21	22.9601	0.694091
Cluster 61: cation transport
observed gene count: 3
expected gene count: 13.2524759100642
uncorrected p-value: 0.99986753632419
GO ID	term	observed gene count	expected gene count	uncorrected p-value
GO:0030001	metal ion transport	1	0.872591	0.592389
GO:0006812	cation transport	2	3.10861	0.8248

## Sheet: EE_50-180
sample name: EE_50-180
number of associated genes in the sample: 695
Cluster 1: growth
observed gene count: 277
expected gene count: 58.6607780157031
uncorrected p-value: 1.07347579440443e-115
GO ID	term	observed gene count	expected gene count	uncorrected p-value
GO:0009792	embryonic development ending in birth or egg hatching	236	45.5923	1.87752e-104
GO:0002119	nematode larval development	169	28.5088	3.52699e-81
GO:0040007	growth	152	23.5635	1.24813e-77
GO:0040010	positive regulation of growth rate	139	23.393	4.17925e-66
Cluster 2: hermaphrodite genitalia development
observed gene count: 69
expected gene count: 11.3011911134904
uncorrected p-value: 3.09688016947389e-33
GO ID	term	observed gene count	expected gene count	uncorrected p-value
GO:0040035	hermaphrodite genitalia development	69	11.1462	1.31007e-33
Cluster 3: determination of adult life span
observed gene count: 59
expected gene count: 12.6033859743041
uncorrected p-value: 1.34599612383101e-22
GO ID	term	observed gene count	expected gene count	uncorrected p-value
GO:0008340	determination of adult life span	59	12.5879	1.26623e-22
Cluster 4: apoptosis
observed gene count: 46
expected gene count: 7.96819236259814
uncorrected p-value: 1.8022795940742e-21
GO ID	term	observed gene count	expected gene count	uncorrected p-value
GO:0006915	apoptosis	45	6.52648	3.62549e-24
GO:0006309	DNA fragmentation involved in apoptosis	3	0.170526	0.000557798
GO:0000737	DNA catabolic process, endonucleolytic	1	0.0930139	0.0894875
GO:0006259	DNA metabolic process	1	0.20153	0.183833
GO:0012501	programmed cell death	1	0.217032	0.196489
GO:0006997	nucleus organization	1	0.46507	0.374288
Cluster 5: regulation of multicellular organism growth
observed gene count: 24
expected gene count: 5.47231887937188
uncorrected p-value: 2.17300179503836e-09
GO ID	term	observed gene count	expected gene count	uncorrected p-value
GO:0040018	positive regulation of multicellular organism growth	23	5.23978	4.61016e-09
GO:0040014	regulation of multicellular organism growth	1	0.372056	0.312757
Cluster 6: oogenesis
observed gene count: 19
expected gene count: 4.15462169878658
uncorrected p-value: 5.24882790062151e-08
GO ID	term	observed gene count	expected gene count	uncorrected p-value
GO:0048477	oogenesis	12	2.91444	4.18873e-05
GO:0007276	gamete generation	7	1.3177	0.000362149
Cluster 7: meiosis
observed gene count: 24
expected gene count: 6.51097430406852
uncorrected p-value: 6.09227987695822e-08
GO ID	term	observed gene count	expected gene count	uncorrected p-value
GO:0007052	mitotic spindle organization	9	1.13167	1.97022e-06
GO:0000910	cytokinesis	11	2.26334	1.89821e-05
GO:0045132	meiotic chromosome segregation	8	1.79827	0.000469113
GO:0007126	meiosis	8	1.84478	0.000556191
GO:0007059	chromosome segregation	2	0.217032	0.0193027
GO:0007067	mitosis	3	0.790618	0.0446415
GO:0007017	microtubule-based process	1	0.387558	0.323416
Cluster 8: nuclear migration
observed gene count: 9
expected gene count: 1.05415774446824
uncorrected p-value: 1.07133283987807e-06
GO ID	term	observed gene count	expected gene count	uncorrected p-value
GO:0035046	pronuclear migration	9	0.806121	9.971e-08
GO:0007097	nuclear migration	1	0.0930139	0.0894875
Cluster 9: cellular respiration
observed gene count: 5
expected gene count: 0.263539436117059
uncorrected p-value: 4.67971512792177e-06
GO ID	term	observed gene count	expected gene count	uncorrected p-value
GO:0006120	mitochondrial electron transport, NADH to ubiquinone	2	0.0775116	0.00232648
GO:0045333	cellular respiration	1	0.0310046	0.0307647
GO:0022904	respiratory electron transport chain	1	0.046507	0.0457907
GO:0042773	ATP synthesis coupled electron transport	1	0.046507	0.0457907
GO:0022900	electron transport chain	1	0.0775116	0.0751486
Cluster 10: molting cycle, collagen and cuticulin-based cuticle
observed gene count: 16
expected gene count: 4.15462169878658
uncorrected p-value: 5.47748762678146e-06
GO ID	term	observed gene count	expected gene count	uncorrected p-value
GO:0018996	molting cycle, collagen and cuticulin-based cuticle	16	4.15462	5.47749e-06
Cluster 11: morphogenesis of an epithelium
observed gene count: 19
expected gene count: 5.76686295503212
uncorrected p-value: 7.23319927557955e-06
GO ID	term	observed gene count	expected gene count	uncorrected p-value
GO:0002009	morphogenesis of an epithelium	19	5.73586	6.70121e-06
Cluster 12: RNA processing
observed gene count: 15
expected gene count: 3.82907298358315
uncorrected p-value: 8.71568875758763e-06
GO ID	term	observed gene count	expected gene count	uncorrected p-value
GO:0040027	negative regulation of vulval development	12	2.86793	3.57989e-05
GO:0006396	RNA processing	3	0.496074	0.0131758
GO:0006397	mRNA processing	1	0.232535	0.208949
Cluster 13: embryonic morphogenesis
observed gene count: 9
expected gene count: 1.55023197715917
uncorrected p-value: 2.66491594985916e-05
GO ID	term	observed gene count	expected gene count	uncorrected p-value
GO:0001703	gastrulation with mouth forming first	7	0.992148	6.0297e-05
GO:0048598	embryonic morphogenesis	2	0.511577	0.0924917
Cluster 14: positive regulation of embryonic development
observed gene count: 5
expected gene count: 0.387557994289793
uncorrected p-value: 3.62582149895557e-05
GO ID	term	observed gene count	expected gene count	uncorrected p-value
GO:0040019	positive regulation of embryonic development	5	0.341051	1.86764e-05
Cluster 15: rRNA processing
observed gene count: 6
expected gene count: 0.635595110635261
uncorrected p-value: 3.84875211587223e-05
GO ID	term	observed gene count	expected gene count	uncorrected p-value
GO:0042254	ribosome biogenesis	4	0.186028	2.5672e-05
GO:0009451	RNA modification	1	0.20153	0.183833
GO:0006364	rRNA processing	1	0.248037	0.221216
Cluster 16: nucleocytoplasmic transport
observed gene count: 8
expected gene count: 1.42621341898644
uncorrected p-value: 9.50073950316685e-05
GO ID	term	observed gene count	expected gene count	uncorrected p-value
GO:0007264	small GTPase mediated signal transduction	8	1.41071	8.79269e-05
GO:0006913	nucleocytoplasmic transport	1	0.0775116	0.0751486
Cluster 17: protein transport
observed gene count: 10
expected gene count: 2.29434332619557
uncorrected p-value: 0.000112676630506672
GO ID	term	observed gene count	expected gene count	uncorrected p-value
GO:0015031	protein transport	6	0.883632	0.000251853
GO:0045184	establishment of protein localization	1	0.046507	0.0457907
GO:0006605	protein targeting	1	0.046507	0.0457907
GO:0006886	intracellular protein transport	3	0.930139	0.0663531
GO:0008104	protein localization	1	0.480572	0.383994
Cluster 18: collagen and cuticulin-based cuticle development
observed gene count: 8
expected gene count: 1.55023197715917
uncorrected p-value: 0.00017048040307952
GO ID	term	observed gene count	expected gene count	uncorrected p-value
GO:0040002	collagen and cuticulin-based cuticle development	8	1.53473	0.000158974
Cluster 19: gonad development
observed gene count: 9
expected gene count: 2.04630620985011
uncorrected p-value: 0.000229541135520263
GO ID	term	observed gene count	expected gene count	uncorrected p-value
GO:0008406	gonad development	9	2.04631	0.000229541
Cluster 20: protein targeting
observed gene count: 4
expected gene count: 0.35655335474661
uncorrected p-value: 0.000401017015162301
GO ID	term	observed gene count	expected gene count	uncorrected p-value
GO:0007005	mitochondrion organization	2	0.139521	0.00803731
GO:0006626	protein targeting to mitochondrion	1	0.0310046	0.0307647
GO:0006605	protein targeting	1	0.046507	0.0457907
Cluster 21: negative regulation of multicellular organism growth
observed gene count: 7
expected gene count: 1.48822269807281
uncorrected p-value: 0.000755724144675639
GO ID	term	observed gene count	expected gene count	uncorrected p-value
GO:0040015	negative regulation of multicellular organism growth	7	1.48822	0.000755724
Cluster 22: cell redox homeostasis
observed gene count: 5
expected gene count: 0.759613668807994
uncorrected p-value: 0.000958077270325279
GO ID	term	observed gene count	expected gene count	uncorrected p-value
GO:0045454	cell redox homeostasis	5	0.713107	0.000715469
Cluster 23: oxidation reduction
observed gene count: 15
expected gene count: 6.1699232690935
uncorrected p-value: 0.00157196063157254
GO ID	term	observed gene count	expected gene count	uncorrected p-value
GO:0055114	oxidation reduction	14	6.12342	0.0038348
GO:0022900	electron transport chain	1	0.0775116	0.0751486
Cluster 24: oviposition
observed gene count: 13
expected gene count: 5.13126784439686
uncorrected p-value: 0.00220309933487022
GO ID	term	observed gene count	expected gene count	uncorrected p-value
GO:0018991	oviposition	12	4.94524	0.00450406
GO:0048609	reproductive process in a multicellular organism	1	0.0775116	0.0751486
Cluster 25: tRNA aminoacylation for protein translation
observed gene count: 3
expected gene count: 0.511576552462527
uncorrected p-value: 0.0143294370943754
GO ID	term	observed gene count	expected gene count	uncorrected p-value
GO:0006418	tRNA aminoacylation for protein translation	3	0.449567	0.0100441
Cluster 26: regulation of transcription, DNA-dependent
observed gene count: 17
expected gene count: 9.42541042112777
uncorrected p-value: 0.015180957358894
GO ID	term	observed gene count	expected gene count	uncorrected p-value
GO:0006355	regulation of transcription, DNA-dependent	17	9.42541	0.015181
Cluster 27: feminization of hermaphroditic germ-line
observed gene count: 3
expected gene count: 0.604590471092077
uncorrected p-value: 0.0224232841301771
GO ID	term	observed gene count	expected gene count	uncorrected p-value
GO:0040022	feminization of hermaphroditic germ-line	3	0.496074	0.0131758
Cluster 28: nucleosome assembly
observed gene count: 5
expected gene count: 1.65874821556031
uncorrected p-value: 0.0258077700646817
GO ID	term	observed gene count	expected gene count	uncorrected p-value
GO:0006334	nucleosome assembly	5	1.37971	0.0126027
Cluster 29: proteolysis
observed gene count: 14
expected gene count: 7.82867148465382
uncorrected p-value: 0.0275540306708612
GO ID	term	observed gene count	expected gene count	uncorrected p-value
GO:0006511	ubiquitin-dependent protein catabolic process	9	1.14717	2.21239e-06
GO:0030163	protein catabolic process	2	1.95329	0.583635
GO:0006508	proteolysis	3	4.75921	0.856546
Cluster 30: metal ion transport
observed gene count: 13
expected gene count: 8.35575035688794
uncorrected p-value: 0.0795963364843865
GO ID	term	observed gene count	expected gene count	uncorrected p-value
GO:0015986	ATP synthesis coupled proton transport	8	0.263539	6.8879e-11
GO:0030001	metal ion transport	2	0.248037	0.0249407
GO:0006164	purine nucleotide biosynthetic process	1	0.0775116	0.0751486
GO:0055085	transmembrane transport	3	5.48782	0.913406
Cluster 31: cell migration
observed gene count: 4
expected gene count: 1.67425053533191
uncorrected p-value: 0.0876149985928967
GO ID	term	observed gene count	expected gene count	uncorrected p-value
GO:0016477	cell migration	4	1.67425	0.087615
Cluster 32: posttranscriptional regulation of gene expression
observed gene count: 1
expected gene count: 0.108516238401142
uncorrected p-value: 0.103604481927041
GO ID	term	observed gene count	expected gene count	uncorrected p-value
GO:0010608	posttranscriptional regulation of gene expression	1	0.046507	0.0457907
Cluster 33: ER to Golgi vesicle-mediated transport
observed gene count: 2
expected gene count: 0.976646145610278
uncorrected p-value: 0.255565293865145
GO ID	term	observed gene count	expected gene count	uncorrected p-value
GO:0006888	ER to Golgi vesicle-mediated transport	2	0.155023	0.00994403
Cluster 34: sensory perception of chemical stimulus
observed gene count: 3
expected gene count: 2.8059198786581
uncorrected p-value: 0.533838633575093
GO ID	term	observed gene count	expected gene count	uncorrected p-value
GO:0007606	sensory perception of chemical stimulus	3	2.80592	0.533839

## Sheet: EE_50-210
sample name: EE_50-210
number of associated genes in the sample: 962
Cluster 1: growth
observed gene count: 273
expected gene count: 81.1966452533904
uncorrected p-value: 8.00251247422949e-75
GO ID	term	observed gene count	expected gene count	uncorrected p-value
GO:0009792	embryonic development ending in birth or egg hatching	231	63.1076	5.48177e-69
GO:0002119	nematode larval development	163	39.4611	1.44702e-54
GO:0040007	growth	147	32.616	9.90031e-54
GO:0040010	positive regulation of growth rate	141	32.38	1.10395e-49
GO:0009791	post-embryonic development	1	0.343326	0.293281
Cluster 2: nucleosome assembly
observed gene count: 41
expected gene count: 2.12433083511777
uncorrected p-value: 6.18042685425207e-42
GO ID	term	observed gene count	expected gene count	uncorrected p-value
GO:0006334	nucleosome assembly	41	1.90975	2.53558e-44
Cluster 3: hermaphrodite genitalia development
observed gene count: 66
expected gene count: 15.6427997858672
uncorrected p-value: 1.08232477882109e-22
GO ID	term	observed gene count	expected gene count	uncorrected p-value
GO:0040035	hermaphrodite genitalia development	66	15.4282	5.09281e-23
Cluster 4: apoptosis
observed gene count: 32
expected gene count: 11.0293540328337
uncorrected p-value: 1.0890705261556e-07
GO ID	term	observed gene count	expected gene count	uncorrected p-value
GO:0006915	apoptosis	29	9.03377	5.08146e-08
GO:0006309	DNA fragmentation involved in apoptosis	5	0.236037	1.86825e-06
GO:0000737	DNA catabolic process, endonucleolytic	2	0.128747	0.00651496
GO:0006259	DNA metabolic process	2	0.278953	0.0306733
GO:0012501	programmed cell death	2	0.30041	0.0352848
GO:0008219	cell death	1	1.15873	0.690265
Cluster 5: transcription initiation
observed gene count: 9
expected gene count: 1.28747323340471
uncorrected p-value: 5.1544387509833e-06
GO ID	term	observed gene count	expected gene count	uncorrected p-value
GO:0006351	transcription, DNA-dependent	7	0.729568	6.64882e-06
GO:0006352	transcription initiation	1	0.257495	0.229203
GO:0006366	transcription from RNA polymerase II promoter	1	0.278953	0.245747
Cluster 6: oviposition
observed gene count: 21
expected gene count: 7.10256067094932
uncorrected p-value: 1.21130229959349e-05
GO ID	term	observed gene count	expected gene count	uncorrected p-value
GO:0018991	oviposition	20	6.84507	2.29404e-05
GO:0048609	reproductive process in a multicellular organism	1	0.107289	0.102787
Cluster 7: determination of adult life span
observed gene count: 37
expected gene count: 17.4452623126338
uncorrected p-value: 1.96636400904893e-05
GO ID	term	observed gene count	expected gene count	uncorrected p-value
GO:0008340	determination of adult life span	37	17.4238	1.91533e-05
Cluster 8: RNA processing
observed gene count: 9
expected gene count: 1.58788365453248
uncorrected p-value: 2.94935518573324e-05
GO ID	term	observed gene count	expected gene count	uncorrected p-value
GO:0006396	RNA processing	4	0.686652	0.00469791
GO:0042254	ribosome biogenesis	2	0.257495	0.0263233
GO:0006364	rRNA processing	2	0.343326	0.0452403
GO:0008033	tRNA processing	2	0.364784	0.0505591
Cluster 9: cell redox homeostasis
observed gene count: 7
expected gene count: 1.05143647394718
uncorrected p-value: 8.02899667199186e-05
GO ID	term	observed gene count	expected gene count	uncorrected p-value
GO:0045454	cell redox homeostasis	7	0.987063	5.28978e-05
Cluster 10: regulation of multicellular organism growth
observed gene count: 20
expected gene count: 7.57463418986438
uncorrected p-value: 9.36741571976864e-05
GO ID	term	observed gene count	expected gene count	uncorrected p-value
GO:0040018	positive regulation of multicellular organism growth	19	7.25277	0.000153467
GO:0040014	regulation of multicellular organism growth	1	0.514989	0.405913
Cluster 11: morphogenesis of an epithelium
observed gene count: 19
expected gene count: 7.98233404710921
uncorrected p-value: 0.000506693948448934
GO ID	term	observed gene count	expected gene count	uncorrected p-value
GO:0002009	morphogenesis of an epithelium	19	7.93942	0.000474632
Cluster 12: ubiquinone biosynthetic process
observed gene count: 3
expected gene count: 0.171663097787295
uncorrected p-value: 0.00050883405755003
GO ID	term	observed gene count	expected gene count	uncorrected p-value
GO:0006744	ubiquinone biosynthetic process	3	0.171663	0.000508834
Cluster 13: mitosis
observed gene count: 20
expected gene count: 9.22689150606709
uncorrected p-value: 0.00115969994750348
GO ID	term	observed gene count	expected gene count	uncorrected p-value
GO:0007052	mitotic spindle organization	6	1.56643	0.00483318
GO:0045132	meiotic chromosome segregation	7	2.48911	0.0127423
GO:0000910	cytokinesis	7	3.13285	0.0386232
GO:0007067	mitosis	3	1.09435	0.0963549
GO:0007126	meiosis	5	2.55349	0.113639
GO:0051301	cell division	5	2.55349	0.113639
GO:0000226	microtubule cytoskeleton organization	1	0.171663	0.159321
GO:0007059	chromosome segregation	1	0.30041	0.261936
GO:0007049	cell cycle	1	0.343326	0.293281
GO:0007017	microtubule-based process	1	0.536447	0.418668
Cluster 14: cell migration
observed gene count: 8
expected gene count: 2.31745182012848
uncorrected p-value: 0.00233165872709793
GO ID	term	observed gene count	expected gene count	uncorrected p-value
GO:0016477	cell migration	8	2.31745	0.00233166
Cluster 15: protein transport
observed gene count: 10
expected gene count: 3.51909350463954
uncorrected p-value: 0.0029936943879404
GO ID	term	observed gene count	expected gene count	uncorrected p-value
GO:0006614	SRP-dependent cotranslational protein targeting to membrane	3	0.171663	0.000508834
GO:0015031	protein transport	6	1.2231	0.00137421
GO:0006886	intracellular protein transport	2	1.28747	0.369899
Cluster 16: fertilization
observed gene count: 6
expected gene count: 1.45913633119201
uncorrected p-value: 0.00339949288419442
GO ID	term	observed gene count	expected gene count	uncorrected p-value
GO:0035046	pronuclear migration	5	1.11581	0.00508618
GO:0009566	fertilization	1	0.0429158	0.0424558
GO:0007097	nuclear migration	1	0.128747	0.122042
Cluster 17: nucleocytoplasmic transport
observed gene count: 7
expected gene count: 1.97412562455389
uncorrected p-value: 0.00370561088498882
GO ID	term	observed gene count	expected gene count	uncorrected p-value
GO:0007264	small GTPase mediated signal transduction	7	1.95267	0.00348687
GO:0006913	nucleocytoplasmic transport	1	0.107289	0.102787
Cluster 18: RNA splicing
observed gene count: 11
expected gene count: 4.67781941470378
uncorrected p-value: 0.00785376457325237
GO ID	term	observed gene count	expected gene count	uncorrected p-value
GO:0040027	negative regulation of vulval development	10	3.96971	0.00693872
GO:0008380	RNA splicing	1	0.0429158	0.0424558
GO:0006397	mRNA processing	1	0.321868	0.277778
Cluster 19: mitochondrion organization
observed gene count: 3
expected gene count: 0.493531406138473
uncorrected p-value: 0.0126658626358224
GO ID	term	observed gene count	expected gene count	uncorrected p-value
GO:0007005	mitochondrion organization	2	0.193121	0.0149816
GO:0006626	protein targeting to mitochondrion	1	0.0429158	0.0424558
Cluster 20: molting cycle, collagen and cuticulin-based cuticle
observed gene count: 12
expected gene count: 5.75071377587438
uncorrected p-value: 0.0137521512517911
GO ID	term	observed gene count	expected gene count	uncorrected p-value
GO:0018996	molting cycle, collagen and cuticulin-based cuticle	12	5.75071	0.0137522
Cluster 21: embryonic morphogenesis
observed gene count: 6
expected gene count: 2.14578872234118
uncorrected p-value: 0.0209233988439055
GO ID	term	observed gene count	expected gene count	uncorrected p-value
GO:0001703	gastrulation with mouth forming first	5	1.3733	0.0121055
GO:0048598	embryonic morphogenesis	1	0.70811	0.511334
Cluster 22: collagen and cuticulin-based cuticle development
observed gene count: 6
expected gene count: 2.14578872234118
uncorrected p-value: 0.0209233988439055
GO ID	term	observed gene count	expected gene count	uncorrected p-value
GO:0040002	collagen and cuticulin-based cuticle development	6	2.12433	0.020019
Cluster 23: regulation of transcription, DNA-dependent
observed gene count: 21
expected gene count: 13.0463954318344
uncorrected p-value: 0.0236693562132186
GO ID	term	observed gene count	expected gene count	uncorrected p-value
GO:0006355	regulation of transcription, DNA-dependent	21	13.0464	0.0236694
Cluster 24: negative regulation of multicellular organism growth
observed gene count: 5
expected gene count: 2.05995717344754
uncorrected p-value: 0.0560139479527406
GO ID	term	observed gene count	expected gene count	uncorrected p-value
GO:0040015	negative regulation of multicellular organism growth	5	2.05996	0.0560139
Cluster 25: posttranscriptional regulation of gene expression
observed gene count: 1
expected gene count: 0.150205210563883
uncorrected p-value: 0.140883254356946
GO ID	term	observed gene count	expected gene count	uncorrected p-value
GO:0010608	posttranscriptional regulation of gene expression	1	0.0643737	0.0630036
Cluster 26: sensory perception of chemical stimulus
observed gene count: 5
expected gene count: 3.88387758743754
uncorrected p-value: 0.348179508048307
GO ID	term	observed gene count	expected gene count	uncorrected p-value
GO:0007606	sensory perception of chemical stimulus	5	3.88388	0.34818
Cluster 27: proteolysis
observed gene count: 11
expected gene count: 10.836233047823
uncorrected p-value: 0.522086021236936
GO ID	term	observed gene count	expected gene count	uncorrected p-value
GO:0044257	cellular protein catabolic process	1	0.0214579	0.0214579
GO:0006511	ubiquitin-dependent protein catabolic process	4	1.58788	0.074894
GO:0006508	proteolysis	5	6.58757	0.789941
GO:0030163	protein catabolic process	1	2.70369	0.935235
Cluster 28: ion transport
observed gene count: 3
expected gene count: 5.21426659528908
uncorrected p-value: 0.895470080262159
GO ID	term	observed gene count	expected gene count	uncorrected p-value
GO:0030001	metal ion transport	1	0.343326	0.293281
GO:0006812	cation transport	1	1.2231	0.709803
GO:0006811	ion transport	1	3.39035	0.967721
Cluster 29: protein amino acid phosphorylation
observed gene count: 3
expected gene count: 9.07668629550321
uncorrected p-value: 0.994641388672228
GO ID	term	observed gene count	expected gene count	uncorrected p-value
GO:0006468	protein amino acid phosphorylation	3	9.03377	0.994449

## Sheet: EE_50-240
sample name: EE_50-240
number of associated genes in the sample: 887
Cluster 1: growth
observed gene count: 329
expected gene count: 74.8663454675232
uncorrected p-value: 5.5421465564981e-127
GO ID	term	observed gene count	expected gene count	uncorrected p-value
GO:0009792	embryonic development ending in birth or egg hatching	279	58.1876	2.45717e-114
GO:0002119	nematode larval development	211	36.3846	1.02569e-99
GO:0040007	growth	185	30.0732	4.84543e-91
GO:0040010	positive regulation of growth rate	159	29.8555	1.45942e-68
GO:0040009	regulation of growth rate	1	0.03957	0.0391789
Cluster 2: apoptosis
observed gene count: 59
expected gene count: 10.169477159172
uncorrected p-value: 2.01566771997862e-27
GO ID	term	observed gene count	expected gene count	uncorrected p-value
GO:0006915	apoptosis	56	8.32947	2.28296e-29
GO:0006309	DNA fragmentation involved in apoptosis	4	0.217635	4.49553e-05
GO:0000737	DNA catabolic process, endonucleolytic	2	0.11871	0.0055632
GO:0008219	cell death	3	1.06839	0.0913476
GO:0006259	DNA metabolic process	1	0.257205	0.228808
GO:0012501	programmed cell death	1	0.27699	0.244071
GO:0006997	nucleus organization	1	0.593549	0.451021
Cluster 3: determination of adult life span (aging)
observed gene count: 69
expected gene count: 16.0851846895075
uncorrected p-value: 4.47581554020393e-24
GO ID	term	observed gene count	expected gene count	uncorrected p-value
GO:0008340	determination of adult life span	69	16.0654	4.17208e-24
Cluster 4: hermaphrodite genitalia development (genitalia development)
observed gene count: 65
expected gene count: 14.4232467880086
uncorrected p-value: 6.73906601875247e-24
GO ID	term	observed gene count	expected gene count	uncorrected p-value
GO:0040035	hermaphrodite genitalia development	65	14.2254	3.16595e-24
Cluster 5: molting cycle, collagen and cuticulin-based cuticle (molting cycle)
observed gene count: 30
expected gene count: 5.3023733047823
uncorrected p-value: 2.72684350755679e-14
GO ID	term	observed gene count	expected gene count	uncorrected p-value
GO:0018996	molting cycle, collagen and cuticulin-based cuticle	30	5.30237	2.72684e-14
Cluster 6: gamete generation
observed gene count: 31
expected gene count: 5.69807280513919
uncorrected p-value: 2.97685421613123e-14
GO ID	term	observed gene count	expected gene count	uncorrected p-value
GO:0007281	germ cell development	14	2.17635	4.04079e-08
GO:0007276	gamete generation	9	1.68172	4.7984e-05
GO:0008406	gonad development	11	2.61162	6.75047e-05
Cluster 7: protein transport
observed gene count: 21
expected gene count: 4.0559198786581
uncorrected p-value: 1.03405516764487e-09
GO ID	term	observed gene count	expected gene count	uncorrected p-value
GO:0007264	small GTPase mediated signal transduction	12	1.80043	2.52138e-07
GO:0015031	protein transport	7	1.12774	0.000129645
GO:0006886	intracellular protein transport	6	1.1871	0.00119043
GO:0045184	establishment of protein localization	1	0.0593549	0.0581896
GO:0006913	nucleocytoplasmic transport	1	0.0989249	0.0950912
GO:0008104	protein localization	2	0.613334	0.124957
Cluster 8: cellular respiration
observed gene count: 7
expected gene count: 0.336344575303355
uncorrected p-value: 1.89652045510932e-08
GO ID	term	observed gene count	expected gene count	uncorrected p-value
GO:0006120	mitochondrial electron transport, NADH to ubiquinone	3	0.0989249	7.49255e-05
GO:0022900	electron transport chain	2	0.0989249	0.00375802
GO:0045333	cellular respiration	1	0.03957	0.0391789
GO:0022904	respiratory electron transport chain	1	0.0593549	0.0581896
GO:0042773	ATP synthesis coupled electron transport	1	0.0593549	0.0581896
Cluster 9: regulation of multicellular organism growth (growth regulation)
observed gene count: 24
expected gene count: 6.98409618129907
uncorrected p-value: 2.11187899298695e-07
GO ID	term	observed gene count	expected gene count	uncorrected p-value
GO:0040018	positive regulation of multicellular organism growth	23	6.68732	3.70456e-07
GO:0040014	regulation of multicellular organism growth	2	0.474839	0.0810526
Cluster 10: oxidation reduction
observed gene count: 25
expected gene count: 7.87442005710207
uncorrected p-value: 5.21811708781879e-07
GO ID	term	observed gene count	expected gene count	uncorrected p-value
GO:0055114	oxidation reduction	23	7.81507	5.20155e-06
GO:0022900	electron transport chain	2	0.0989249	0.00375802
Cluster 11: oogenesis
observed gene count: 20
expected gene count: 5.32215827980014
uncorrected p-value: 5.31124369544719e-07
GO ID	term	observed gene count	expected gene count	uncorrected p-value
GO:0007276	gamete generation	9	1.68172	4.7984e-05
GO:0048477	oogenesis	11	3.71958	0.00139449
Cluster 12: negative regulation of vulval development
observed gene count: 17
expected gene count: 3.93721002855104
uncorrected p-value: 5.48664012240793e-07
GO ID	term	observed gene count	expected gene count	uncorrected p-value
GO:0040027	negative regulation of vulval development	17	3.66022	1.94292e-07
Cluster 13: meiosis
observed gene count: 24
expected gene count: 8.50753925767309
uncorrected p-value: 6.68372908132144e-06
GO ID	term	observed gene count	expected gene count	uncorrected p-value
GO:0000910	cytokinesis	13	2.88861	7.38755e-06
GO:0045132	meiotic chromosome segregation	9	2.29506	0.000516737
GO:0051301	cell division	8	2.35441	0.00259805
GO:0007052	mitotic spindle organization	6	1.4443	0.00326187
GO:0007126	meiosis	7	2.35441	0.00962791
GO:0007059	chromosome segregation	2	0.27699	0.0303966
GO:0007067	mitosis	3	1.00903	0.0800117
GO:0007017	microtubule-based process	1	0.494624	0.393298
Cluster 14: fertilization
observed gene count: 9
expected gene count: 1.52344307637402
uncorrected p-value: 2.16357040553795e-05
GO ID	term	observed gene count	expected gene count	uncorrected p-value
GO:0035046	pronuclear migration	8	1.02882	7.9295e-06
GO:0009566	fertilization	1	0.03957	0.0391789
GO:0007097	nuclear migration	1	0.11871	0.112997
Cluster 15: embryonic morphogenesis
observed gene count: 10
expected gene count: 1.97849750178444
uncorrected p-value: 3.04070088863772e-05
GO ID	term	observed gene count	expected gene count	uncorrected p-value
GO:0001703	gastrulation with mouth forming first	6	1.26624	0.00166798
GO:0048598	embryonic morphogenesis	4	0.652904	0.00394675
Cluster 16: protein processing
observed gene count: 4
expected gene count: 0.217634725196288
uncorrected p-value: 4.49553090473598e-05
GO ID	term	observed gene count	expected gene count	uncorrected p-value
GO:0006465	signal peptide processing	3	0.0791399	3.04197e-05
GO:0016485	protein processing	1	0.0791399	0.0768245
Cluster 17: morphogenesis of an epithelium
observed gene count: 20
expected gene count: 7.36001070663812
uncorrected p-value: 6.40504230664556e-05
GO ID	term	observed gene count	expected gene count	uncorrected p-value
GO:0002009	morphogenesis of an epithelium	20	7.32044	5.94831e-05
Cluster 18: protein targeting
observed gene count: 5
expected gene count: 0.474839400428266
uncorrected p-value: 9.32093721831271e-05
GO ID	term	observed gene count	expected gene count	uncorrected p-value
GO:0006605	protein targeting	2	0.0593549	0.0011576
GO:0006613	cotranslational protein targeting to membrane	1	0.019785	0.019785
GO:0006626	protein targeting to mitochondrion	1	0.03957	0.0391789
GO:0007005	mitochondrion organization	1	0.178065	0.164618
Cluster 19: positive regulation of embryonic development
observed gene count: 5
expected gene count: 0.49462437544611
uncorrected p-value: 0.000114618482343289
GO ID	term	observed gene count	expected gene count	uncorrected p-value
GO:0040019	positive regulation of embryonic development	5	0.435269	5.96743e-05
Cluster 20: oviposition
observed gene count: 17
expected gene count: 6.5488267309065
uncorrected p-value: 0.000374257845044663
GO ID	term	observed gene count	expected gene count	uncorrected p-value
GO:0018991	oviposition	16	6.31141	0.000707835
GO:0048609	reproductive process in a multicellular organism	1	0.0989249	0.0950912
Cluster 21: cell redox homeostasis
observed gene count: 6
expected gene count: 0.969463775874375
uncorrected p-value: 0.000399509959564246
GO ID	term	observed gene count	expected gene count	uncorrected p-value
GO:0045454	cell redox homeostasis	6	0.910109	0.000281383
Cluster 22: peptidyl-lysine modification to hypusine
observed gene count: 2
expected gene count: 0.0593549250535332
uncorrected p-value: 0.00115759978092177
GO ID	term	observed gene count	expected gene count	uncorrected p-value
GO:0008612	peptidyl-lysine modification to hypusine	2	0.0593549	0.0011576
Cluster 23: negative regulation of multicellular organism growth
observed gene count: 7
expected gene count: 1.89935760171306
uncorrected p-value: 0.00301445200055782
GO ID	term	observed gene count	expected gene count	uncorrected p-value
GO:0040015	negative regulation of multicellular organism growth	7	1.89936	0.00301445
Cluster 24: RNA splicing
observed gene count: 5
expected gene count: 1.00903372591006
uncorrected p-value: 0.00331970518669923
GO ID	term	observed gene count	expected gene count	uncorrected p-value
GO:0006396	RNA processing	3	0.633119	0.0250075
GO:0008380	RNA splicing	1	0.03957	0.0391789
GO:0006397	mRNA processing	1	0.296775	0.259031
Cluster 25: regulation of actin filament polymerization
observed gene count: 3
expected gene count: 0.356129550321199
uncorrected p-value: 0.00504514552119684
GO ID	term	observed gene count	expected gene count	uncorrected p-value
GO:0030833	regulation of actin filament polymerization	3	0.138495	0.000254559
Cluster 26: nucleosome assembly
observed gene count: 7
expected gene count: 2.11699232690935
uncorrected p-value: 0.00548016489205363
GO ID	term	observed gene count	expected gene count	uncorrected p-value
GO:0006334	nucleosome assembly	7	1.76086	0.00196125
Cluster 27: cell migration
observed gene count: 7
expected gene count: 2.13677730192719
uncorrected p-value: 0.00576238429385803
GO ID	term	observed gene count	expected gene count	uncorrected p-value
GO:0016477	cell migration	7	2.13678	0.00576238
Cluster 28: feminization of hermaphroditic germ-line
observed gene count: 4
expected gene count: 0.771614025695932
uncorrected p-value: 0.00722698173582899
GO ID	term	observed gene count	expected gene count	uncorrected p-value
GO:0040022	feminization of hermaphroditic germ-line	4	0.633119	0.00352281
Cluster 29: tRNA processing
observed gene count: 3
expected gene count: 0.593549250535332
uncorrected p-value: 0.0210711790093916
GO ID	term	observed gene count	expected gene count	uncorrected p-value
GO:0008033	tRNA processing	2	0.336345	0.0436959
GO:0009451	RNA modification	1	0.257205	0.228808
Cluster 30: vulval development
observed gene count: 5
expected gene count: 1.82021770164168
uncorrected p-value: 0.0361148121377567
GO ID	term	observed gene count	expected gene count	uncorrected p-value
GO:0040025	vulval development	5	1.82022	0.0361148
Cluster 31: defecation
observed gene count: 3
expected gene count: 0.870538900785154
uncorrected p-value: 0.0562036455254199
GO ID	term	observed gene count	expected gene count	uncorrected p-value
GO:0030421	defecation	3	0.811184	0.047219
Cluster 32: posttranscriptional regulation of gene expression
observed gene count: 1
expected gene count: 0.138494825124911
uncorrected p-value: 0.130548462274011
GO ID	term	observed gene count	expected gene count	uncorrected p-value
GO:0010608	posttranscriptional regulation of gene expression	1	0.0593549	0.0581896
Cluster 33: collagen and cuticulin-based cuticle development
observed gene count: 4
expected gene count: 1.97849750178444
uncorrected p-value: 0.136973332185262
GO ID	term	observed gene count	expected gene count	uncorrected p-value
GO:0040002	collagen and cuticulin-based cuticle development	4	1.95871	0.133445
Cluster 34: nucleoside metabolic process
observed gene count: 1
expected gene count: 0.1780647751606
uncorrected p-value: 0.164617916096394
GO ID	term	observed gene count	expected gene count	uncorrected p-value
GO:0009116	nucleoside metabolic process	1	0.178065	0.164618
Cluster 35: cation transport
observed gene count: 14
expected gene count: 10.6443165596003
uncorrected p-value: 0.183608799894303
GO ID	term	observed gene count	expected gene count	uncorrected p-value
GO:0015986	ATP synthesis coupled proton transport	7	0.336345	1.89652e-08
GO:0006796	phosphate metabolic process	1	0.019785	0.019785
GO:0006164	purine nucleotide biosynthetic process	1	0.0989249	0.0950912
GO:0034220	ion transmembrane transport	1	0.138495	0.130548
GO:0006812	cation transport	1	1.12774	0.680107
GO:0055085	transmembrane transport	4	7.00388	0.921314
Cluster 36: proteolysis
observed gene count: 13
expected gene count: 9.99141238401142
uncorrected p-value: 0.204626917039422
GO ID	term	observed gene count	expected gene count	uncorrected p-value
GO:0006511	ubiquitin-dependent protein catabolic process	4	1.46409	0.0592013
GO:0030163	protein catabolic process	3	2.49291	0.455803
GO:0006508	proteolysis	6	6.07399	0.568414
Cluster 37: positive regulation of programmed cell death
observed gene count: 1
expected gene count: 0.237419700214133
uncorrected p-value: 0.213238036870011
GO ID	term	observed gene count	expected gene count	uncorrected p-value
GO:0043068	positive regulation of programmed cell death	1	0.19785	0.181149
Cluster 38: regulation of transcription, DNA-dependent
observed gene count: 14
expected gene count: 12.0292648108494
uncorrected p-value: 0.319796788301957
GO ID	term	observed gene count	expected gene count	uncorrected p-value
GO:0006355	regulation of transcription, DNA-dependent	14	12.0293	0.319797
Cluster 39: establishment of cell polarity
observed gene count: 1
expected gene count: 0.534194325481799
uncorrected p-value: 0.417081373949488
GO ID	term	observed gene count	expected gene count	uncorrected p-value
GO:0030010	establishment of cell polarity	1	0.15828	0.147753
Cluster 40: sensory perception of chemical stimulus
observed gene count: 1
expected gene count: 3.58108047822984
uncorrected p-value: 0.973333165330697
GO ID	term	observed gene count	expected gene count	uncorrected p-value
GO:0007606	sensory perception of chemical stimulus	1	3.58108	0.973333

## Sheet: EE_50-300
sample name: EE_50-300
number of associated genes in the sample: 855
Cluster 1: growth
observed gene count: 268
expected gene count: 72.1654175588865
uncorrected p-value: 5.88323542083905e-84
GO ID	term	observed gene count	expected gene count	uncorrected p-value
GO:0002119	nematode larval development	158	35.0719	3.91103e-58
GO:0009792	embryonic development ending in birth or egg hatching	197	56.0884	9.5129e-56
GO:0040010	positive regulation of growth rate	126	28.7784	1.14119e-44
GO:0040007	growth	114	28.9882	5.90029e-36
GO:0009791	post-embryonic development	1	0.305139	0.265186
Cluster 2: hermaphrodite genitalia development
observed gene count: 76
expected gene count: 13.9029041755889
uncorrected p-value: 2.70011646181207e-33
GO ID	term	observed gene count	expected gene count	uncorrected p-value
GO:0040035	hermaphrodite genitalia development	76	13.7122	1.06236e-33
Cluster 3: tissue morphogenesis
observed gene count: 46
expected gene count: 7.09448608137045
uncorrected p-value: 1.21582108065416e-23
GO ID	term	observed gene count	expected gene count	uncorrected p-value
GO:0002009	morphogenesis of an epithelium	45	7.05634	7.40739e-23
GO:0048729	tissue morphogenesis	1	0.0190712	0.0190712
Cluster 4: regulation of vulval development
observed gene count: 33
expected gene count: 3.79516862955032
uncorrected p-value: 2.46985730385989e-21
GO ID	term	observed gene count	expected gene count	uncorrected p-value
GO:0040027	negative regulation of vulval development	29	3.52817	3.18611e-18
GO:0040028	regulation of vulval development	7	0.343282	2.37285e-08
Cluster 5: cell migration
observed gene count: 26
expected gene count: 2.38389989293362
uncorrected p-value: 1.12879225719258e-19
GO ID	term	observed gene count	expected gene count	uncorrected p-value
GO:0001764	neuron migration	12	0.495851	1.6216e-14
GO:0016477	cell migration	16	2.05969	2.65332e-10
Cluster 6: oviposition
observed gene count: 39
expected gene count: 6.31256691648822
uncorrected p-value: 1.71931729322654e-19
GO ID	term	observed gene count	expected gene count	uncorrected p-value
GO:0018991	oviposition	39	6.08371	4.61094e-20
Cluster 7: regulation of transcription, DNA-dependent
observed gene count: 48
expected gene count: 11.5952890792291
uncorrected p-value: 1.75192692293024e-16
GO ID	term	observed gene count	expected gene count	uncorrected p-value
GO:0006355	regulation of transcription, DNA-dependent	48	11.5953	1.75193e-16
Cluster 8: axonogenesis
observed gene count: 24
expected gene count: 2.97510706638116
uncorrected p-value: 3.91914840953321e-15
GO ID	term	observed gene count	expected gene count	uncorrected p-value
GO:0007413	axonal fasciculation	12	1.56384	5.23614e-08
GO:0007411	axon guidance	9	1.06799	1.08753e-06
GO:0048666	neuron development	4	0.209783	3.8958e-05
GO:0030182	neuron differentiation	3	0.15257	0.000360338
GO:0007409	axonogenesis	1	0.133498	0.126107
Cluster 9: cell fate determination
observed gene count: 15
expected gene count: 0.896346359743041
uncorrected p-value: 6.06555972808176e-15
GO ID	term	observed gene count	expected gene count	uncorrected p-value
GO:0042659	regulation of cell fate specification	7	0.362353	3.69499e-08
GO:0009786	regulation of asymmetric cell division	5	0.171641	2.94862e-07
GO:0010085	polarity specification of proximal/distal axis	4	0.114427	1.91127e-06
GO:0001709	cell fate determination	3	0.095356	6.71697e-05
GO:0009952	anterior/posterior pattern formation	3	0.247926	0.00171365
GO:0009954	proximal/distal pattern formation	1	0.0190712	0.0190712
GO:0007389	pattern specification process	1	0.0572136	0.0561306
Cluster 10: positive regulation of gene expression
observed gene count: 21
expected gene count: 2.2122591006424
uncorrected p-value: 7.10669586198642e-15
GO ID	term	observed gene count	expected gene count	uncorrected p-value
GO:0045944	positive regulation of transcription from RNA polymerase II promoter	12	1.35406	9.7994e-09
GO:0006357	regulation of transcription from RNA polymerase II promoter	9	0.80099	8.12311e-08
GO:0010628	positive regulation of gene expression	1	0.0381424	0.0377791
GO:0045893	positive regulation of transcription, DNA-dependent	1	0.114427	0.109114
Cluster 11: RNA processing
observed gene count: 15
expected gene count: 1.12520074946467
uncorrected p-value: 2.60370609533442e-13
GO ID	term	observed gene count	expected gene count	uncorrected p-value
GO:0006364	rRNA processing	9	0.305139	3.24915e-12
GO:0006396	RNA processing	5	0.610278	0.000327527
GO:0042254	ribosome biogenesis	1	0.228854	0.206335
Cluster 12: apoptosis
observed gene count: 37
expected gene count: 9.32581638115632
uncorrected p-value: 1.8566047313281e-12
GO ID	term	observed gene count	expected gene count	uncorrected p-value
GO:0006915	apoptosis	30	8.02897	9.64341e-10
GO:0008219	cell death	5	1.02984	0.00364576
GO:0043068	positive regulation of programmed cell death	2	0.190712	0.0147695
GO:0043069	negative regulation of programmed cell death	1	0.0572136	0.0561306
GO:0042981	regulation of apoptosis	1	0.114427	0.109114
GO:0012501	programmed cell death	1	0.266997	0.236327
Cluster 13: determination of adult life span
observed gene count: 49
expected gene count: 15.5048849036403
uncorrected p-value: 2.37627294191559e-12
GO ID	term	observed gene count	expected gene count	uncorrected p-value
GO:0008340	determination of adult life span	49	15.4858	2.27352e-12
Cluster 14: gonad development
observed gene count: 19
expected gene count: 2.5173982869379
uncorrected p-value: 9.55104643822326e-12
GO ID	term	observed gene count	expected gene count	uncorrected p-value
GO:0008406	gonad development	19	2.5174	9.55105e-12
Cluster 15: regulation of multicellular organism growth
observed gene count: 27
expected gene count: 6.73213329764454
uncorrected p-value: 1.44477590600231e-09
GO ID	term	observed gene count	expected gene count	uncorrected p-value
GO:0040018	positive regulation of multicellular organism growth	26	6.44607	2.57503e-09
GO:0040014	regulation of multicellular organism growth	2	0.457709	0.0760811
Cluster 16: oogenesis
observed gene count: 22
expected gene count: 5.13015256959315
uncorrected p-value: 1.42016127325617e-08
GO ID	term	observed gene count	expected gene count	uncorrected p-value
GO:0048477	oogenesis	15	3.58539	3.75519e-06
GO:0007276	gamete generation	8	1.62105	0.000223607
Cluster 17: regulation of locomotion
observed gene count: 12
expected gene count: 1.4112687366167
uncorrected p-value: 1.59412267850953e-08
GO ID	term	observed gene count	expected gene count	uncorrected p-value
GO:0030334	regulation of cell migration	10	0.858204	1.05415e-08
GO:0040012	regulation of locomotion	2	0.533994	0.0992064
Cluster 18: exocytosis
observed gene count: 15
expected gene count: 2.38389989293362
uncorrected p-value: 1.84522992982222e-08
GO ID	term	observed gene count	expected gene count	uncorrected p-value
GO:0032940	secretion by cell	8	1.43034	9.26146e-05
GO:0016192	vesicle-mediated transport	6	0.991702	0.000456111
GO:0006887	exocytosis	1	0.0762848	0.0741326
Cluster 19: meiosis
observed gene count: 18
expected gene count: 3.85238222698073
uncorrected p-value: 7.92687116427797e-08
GO ID	term	observed gene count	expected gene count	uncorrected p-value
GO:0007126	meiosis	10	2.26947	9.90965e-05
GO:0045132	meiotic chromosome segregation	9	2.21226	0.000396945
GO:0007059	chromosome segregation	2	0.266997	0.0284026
GO:0007049	cell cycle	1	0.305139	0.265186
Cluster 20: molting cycle, collagen and cuticulin-based cuticle
observed gene count: 20
expected gene count: 5.11108137044968
uncorrected p-value: 2.82356395111984e-07
GO ID	term	observed gene count	expected gene count	uncorrected p-value
GO:0018996	molting cycle, collagen and cuticulin-based cuticle	20	5.11108	2.82356e-07
Cluster 21: cell fate determination
observed gene count: 8
expected gene count: 0.686563169164882
uncorrected p-value: 3.19504741718468e-07
GO ID	term	observed gene count	expected gene count	uncorrected p-value
GO:0001709	cell fate determination	3	0.095356	6.71697e-05
GO:0045167	asymmetric protein localization involved in cell fate determination	4	0.343282	0.000324772
GO:0008105	asymmetric protein localization	2	0.266997	0.0284026
Cluster 22: gamete generation
observed gene count: 16
expected gene count: 3.60445663811563
uncorrected p-value: 8.22354794208795e-07
GO ID	term	observed gene count	expected gene count	uncorrected p-value
GO:0007276	gamete generation	8	1.62105	0.000223607
GO:0007281	germ cell development	9	2.09783	0.000267425
Cluster 23: protein amino acid phosphorylation
observed gene count: 24
expected gene count: 8.06711723768737
uncorrected p-value: 2.73423643776002e-06
GO ID	term	observed gene count	expected gene count	uncorrected p-value
GO:0006468	protein amino acid phosphorylation	24	8.02897	2.52075e-06
Cluster 24: intracellular protein transport
observed gene count: 13
expected gene count: 2.78439507494647
uncorrected p-value: 4.9898563313125e-06
GO ID	term	observed gene count	expected gene count	uncorrected p-value
GO:0007264	small GTPase mediated signal transduction	8	1.73548	0.00035736
GO:0006886	intracellular protein transport	5	1.14427	0.00573586
Cluster 25: negative regulation of transcription, DNA-dependent
observed gene count: 8
expected gene count: 1.02984475374732
uncorrected p-value: 8.11728300349282e-06
GO ID	term	observed gene count	expected gene count	uncorrected p-value
GO:0000122	negative regulation of transcription from RNA polymerase II promoter	6	0.762848	0.000104375
GO:0045892	negative regulation of transcription, DNA-dependent	2	0.190712	0.0147695
Cluster 26: collagen and cuticulin-based cuticle development
observed gene count: 10
expected gene count: 1.9071199143469
uncorrected p-value: 2.22855112049467e-05
GO ID	term	observed gene count	expected gene count	uncorrected p-value
GO:0040002	collagen and cuticulin-based cuticle development	10	1.88805	2.04022e-05
Cluster 27: cell redox homeostasis
observed gene count: 7
expected gene count: 0.934488758029979
uncorrected p-value: 3.83100627788608e-05
GO ID	term	observed gene count	expected gene count	uncorrected p-value
GO:0045454	cell redox homeostasis	7	0.877275	2.50834e-05
Cluster 28: dosage compensation, by hypoactivation of X chromosome
observed gene count: 4
expected gene count: 0.228854389721627
uncorrected p-value: 5.75534975543555e-05
GO ID	term	observed gene count	expected gene count	uncorrected p-value
GO:0042464	dosage compensation, by hypoactivation of X chromosome	4	0.190712	2.51723e-05
Cluster 29: negative regulation of multicellular organism growth
observed gene count: 9
expected gene count: 1.83083511777302
uncorrected p-value: 9.45322261583865e-05
GO ID	term	observed gene count	expected gene count	uncorrected p-value
GO:0040015	negative regulation of multicellular organism growth	9	1.83084	9.45322e-05
Cluster 30: establishment of cell polarity
observed gene count: 5
expected gene count: 0.476779978586724
uncorrected p-value: 9.64910353377153e-05
GO ID	term	observed gene count	expected gene count	uncorrected p-value
GO:0030010	establishment of cell polarity	2	0.15257	0.00942505
GO:0051294	establishment of spindle orientation	1	0.0190712	0.0190712
GO:0007163	establishment or maintenance of cell polarity	2	0.228854	0.0211233
GO:0040001	establishment of mitotic spindle localization	1	0.133498	0.126107
Cluster 31: RNA interference
observed gene count: 11
expected gene count: 2.72718147751606
uncorrected p-value: 0.000100551834625948
GO ID	term	observed gene count	expected gene count	uncorrected p-value
GO:0016246	RNA interference	11	2.59368	6.3923e-05
Cluster 32: chromosome organization
observed gene count: 4
expected gene count: 0.266996788008565
uncorrected p-value: 0.000112896422917479
GO ID	term	observed gene count	expected gene count	uncorrected p-value
GO:0051276	chromosome organization	4	0.15257	8.65081e-06
Cluster 33: mitosis
observed gene count: 7
expected gene count: 1.39219753747323
uncorrected p-value: 0.000489647692961831
GO ID	term	observed gene count	expected gene count	uncorrected p-value
GO:0000070	mitotic sister chromatid segregation	5	0.362353	2.3219e-05
GO:0007067	mitosis	2	0.972631	0.254055
Cluster 34: regulation of GTPase activity
observed gene count: 5
expected gene count: 0.667491970021413
uncorrected p-value: 0.000503672172964049
GO ID	term	observed gene count	expected gene count	uncorrected p-value
GO:0035023	regulation of Rho protein signal transduction	3	0.381424	0.00618541
GO:0043087	regulation of GTPase activity	1	0.0381424	0.0377791
GO:0051056	regulation of small GTPase mediated signal transduction	1	0.266997	0.236327
Cluster 35: methylation
observed gene count: 3
expected gene count: 0.171640792291221
uncorrected p-value: 0.00053283931147801
GO ID	term	observed gene count	expected gene count	uncorrected p-value
GO:0032259	methylation	3	0.114427	0.000132428
Cluster 36: protein transport
observed gene count: 10
expected gene count: 2.8225374732334
uncorrected p-value: 0.000579903085114903
GO ID	term	observed gene count	expected gene count	uncorrected p-value
GO:0006886	intracellular protein transport	5	1.14427	0.00573586
GO:0015031	protein transport	4	1.08706	0.0233876
GO:0008104	protein localization	2	0.591207	0.117655
Cluster 37: maintenance of protein location
observed gene count: 2
expected gene count: 0.0572135974304069
uncorrected p-value: 0.00107605496039332
GO ID	term	observed gene count	expected gene count	uncorrected p-value
GO:0045185	maintenance of protein location	2	0.0572136	0.00107605
Cluster 38: embryonic digestive tract morphogenesis
observed gene count: 3
expected gene count: 0.266996788008565
uncorrected p-value: 0.00215022383756274
GO ID	term	observed gene count	expected gene count	uncorrected p-value
GO:0048557	embryonic digestive tract morphogenesis	3	0.190712	0.000750411
Cluster 39: transcription, DNA-dependent
observed gene count: 4
expected gene count: 0.648420770877944
uncorrected p-value: 0.00386636872899938
GO ID	term	observed gene count	expected gene count	uncorrected p-value
GO:0006351	transcription, DNA-dependent	4	0.648421	0.00386637
Cluster 40: cytoskeleton organization
observed gene count: 7
expected gene count: 2.05968950749465
uncorrected p-value: 0.00473709270217474
GO ID	term	observed gene count	expected gene count	uncorrected p-value
GO:0007052	mitotic spindle organization	5	1.3922	0.0129043
GO:0000226	microtubule cytoskeleton organization	1	0.15257	0.142775
GO:0007010	cytoskeleton organization	1	0.190712	0.175166
Cluster 41: nuclear migration
observed gene count: 5
expected gene count: 1.25869914346895
uncorrected p-value: 0.00855332983961107
GO ID	term	observed gene count	expected gene count	uncorrected p-value
GO:0007097	nuclear migration	2	0.114427	0.00517875
GO:0035046	pronuclear migration	4	0.991702	0.0172584
Cluster 42: proteolysis
observed gene count: 16
expected gene count: 9.63095556745182
uncorrected p-value: 0.0347678643635329
GO ID	term	observed gene count	expected gene count	uncorrected p-value
GO:0006511	ubiquitin-dependent protein catabolic process	4	1.41127	0.0531043
GO:0030163	protein catabolic process	4	2.40297	0.2205
GO:0006508	proteolysis	8	5.85486	0.234261
Cluster 43: protein complex assembly
observed gene count: 1
expected gene count: 0.0381423982869379
uncorrected p-value: 0.0377791049392873
GO ID	term	observed gene count	expected gene count	uncorrected p-value
GO:0006461	protein complex assembly	1	0.0381424	0.0377791
Cluster 44: GPI anchor biosynthetic process
observed gene count: 3
expected gene count: 0.743776766595289
uncorrected p-value: 0.0380153931241905
GO ID	term	observed gene count	expected gene count	uncorrected p-value
GO:0006506	GPI anchor biosynthetic process	2	0.209783	0.0178256
GO:0046474	glycerophospholipid biosynthetic process	1	0.133498	0.126107
Cluster 45: defense response
observed gene count: 4
expected gene count: 1.33498394004283
uncorrected p-value: 0.0448576413105758
GO ID	term	observed gene count	expected gene count	uncorrected p-value
GO:0045087	innate immune response	3	0.438638	0.009211
GO:0006952	defense response	3	0.95356	0.0700794
Cluster 46: mesoderm development
observed gene count: 1
expected gene count: 0.0762847965738758
uncorrected p-value: 0.0741325552764094
GO ID	term	observed gene count	expected gene count	uncorrected p-value
GO:0007498	mesoderm development	1	0.0381424	0.0377791
Cluster 47: polysaccharide metabolic process
observed gene count: 1
expected gene count: 0.0953559957173448
uncorrected p-value: 0.0917915332642444
GO ID	term	observed gene count	expected gene count	uncorrected p-value
GO:0005976	polysaccharide metabolic process	1	0.0381424	0.0377791
Cluster 48: glycogen metabolic process
observed gene count: 1
expected gene count: 0.228854389721627
uncorrected p-value: 0.206334688663195
GO ID	term	observed gene count	expected gene count	uncorrected p-value
GO:0005976	polysaccharide metabolic process	1	0.0381424	0.0377791
GO:0005977	glycogen metabolic process	1	0.0762848	0.0741326
Cluster 49: mRNA processing
observed gene count: 1
expected gene count: 0.381423982869379
uncorrected p-value: 0.319678925373806
GO ID	term	observed gene count	expected gene count	uncorrected p-value
GO:0006397	mRNA processing	1	0.286068	0.250895
Cluster 50: translation
observed gene count: 4
expected gene count: 3.22303265524625
uncorrected p-value: 0.403163340113225
GO ID	term	observed gene count	expected gene count	uncorrected p-value
GO:0006418	tRNA aminoacylation for protein translation	3	0.553065	0.0174694
GO:0043039	tRNA aminoacylation	1	0.15257	0.142775
GO:0006412	translation	1	2.63183	0.930146
Cluster 51: cation transport
observed gene count: 1
expected gene count: 1.4112687366167
uncorrected p-value: 0.759749279298336
GO ID	term	observed gene count	expected gene count	uncorrected p-value
GO:0006812	cation transport	1	1.08706	0.666546

[truncated: 25 more sheets: EE_50-330, EE_50-360, EE_50-390, EE_50-420, EE_50-450, EE_50-480, EE_50-510, EE_50-540, EE_50-570, EE_50-600, EE_50-630, EE_50-660, EE_50-690, EE_50-720, L1, LIN35, L2, L3, L4, L4MALE …]
