# Supplementary material for: Comparison of D. melanogaster and C. elegans developmental stages, tissues, and cells by modENCODE RNA-seq data
Source: HighWire-hosted journal article supplement (doi:10.1101/gr.170100.113), 2014-07-01
Supplement: Supplemental_Files.zip [file TableS6B WormTissueAllClusters.xls]

## Sheet: DSN-Negative-Positive
sample name: DSN-Negative-Positive
number of associated genes in the sample: 3127
Cluster 1: growth
observed gene count: 1016
expected gene count: 236.589578872234
uncorrected p-value: 0
GO ID	term	observed gene count	expected gene count	uncorrected p-value
GO:0009792	embryonic development ending in birth or egg hatching	937	205.133	0
GO:0002119	nematode larval development	515	128.269	5.61152e-178
GO:0040007	growth	428	106.019	2.138e-147
GO:0009791	post-embryonic development	5	1.11599	0.00374727
Cluster 2: regulation of growth rate
observed gene count: 373
expected gene count: 105.460920770878
uncorrected p-value: 3.51124232085924e-108
GO ID	term	observed gene count	expected gene count	uncorrected p-value
GO:0040010	positive regulation of growth rate	371	105.252	4.25189e-107
GO:0040009	regulation of growth rate	2	0.139499	0.00486352
Cluster 3: hermaphrodite genitalia development
observed gene count: 247
expected gene count: 50.8472296573876
uncorrected p-value: 3.29946876495165e-103
GO ID	term	observed gene count	expected gene count	uncorrected p-value
GO:0040035	hermaphrodite genitalia development	247	50.1497	9.99011e-105
Cluster 4: morphogenesis of an epithelium
observed gene count: 139
expected gene count: 25.9467344753747
uncorrected p-value: 2.67334506744732e-64
GO ID	term	observed gene count	expected gene count	uncorrected p-value
GO:0002009	morphogenesis of an epithelium	139	25.8072	1.20199e-64
Cluster 5: meiosis
observed gene count: 102
expected gene count: 14.0196065310493
uncorrected p-value: 4.28751860748822e-63
GO ID	term	observed gene count	expected gene count	uncorrected p-value
GO:0045132	meiotic chromosome segregation	68	8.09092	4.49468e-48
GO:0007126	meiosis	59	8.30017	2.58529e-36
GO:0007059	chromosome segregation	7	0.97649	1.76681e-05
GO:0007049	cell cycle	7	1.11599	5.19915e-05
GO:0051321	meiotic cell cycle	1	0.0697493	0.0697493
Cluster 6: gamete generation
observed gene count: 105
expected gene count: 15.4843415417559
uncorrected p-value: 5.63848830260811e-61
GO ID	term	observed gene count	expected gene count	uncorrected p-value
GO:0007281	germ cell development	62	7.67242	1.61576e-42
GO:0007276	gamete generation	31	5.92869	4.34794e-15
GO:0048599	oocyte development	10	1.32524	1.38188e-07
GO:0001556	oocyte maturation	8	1.25549	1.28687e-05
GO:0009994	oocyte differentiation	1	0.0697493	0.0697493
Cluster 7: apoptosis
observed gene count: 138
expected gene count: 33.340158815132
uncorrected p-value: 2.26867662085182e-48
GO ID	term	observed gene count	expected gene count	uncorrected p-value
GO:0006915	apoptosis	123	29.3644	7.96318e-44
GO:0008219	cell death	16	3.76646	4.95945e-07
GO:0012501	programmed cell death	5	0.97649	0.00193151
Cluster 8: determination of adult life span
observed gene count: 176
expected gene count: 56.7061697002141
uncorrected p-value: 3.12609544564352e-42
GO ID	term	observed gene count	expected gene count	uncorrected p-value
GO:0008340	determination of adult life span	176	56.6364	2.6239e-42
Cluster 9: regulation of meiosis
observed gene count: 56
expected gene count: 6.90517933618844
uncorrected p-value: 1.18103357400961e-38
GO ID	term	observed gene count	expected gene count	uncorrected p-value
GO:0040020	regulation of meiosis	44	5.85894	9.26838e-29
GO:0051726	regulation of cell cycle	10	0.906741	6.32273e-10
GO:0045836	positive regulation of meiosis	3	0.209248	0.000339025
Cluster 10: gene silencing
observed gene count: 66
expected gene count: 9.97414793004996
uncorrected p-value: 5.62586234494915e-38
GO ID	term	observed gene count	expected gene count	uncorrected p-value
GO:0016246	RNA interference	64	9.4859	1.64436e-37
GO:0016458	gene silencing	3	0.209248	0.000339025
GO:0010608	posttranscriptional regulation of gene expression	2	0.209248	0.0139125
Cluster 11: DNA repair
observed gene count: 61
expected gene count: 8.85815935046395
uncorrected p-value: 1.80246011045244e-36
GO ID	term	observed gene count	expected gene count	uncorrected p-value
GO:0006281	DNA repair	27	2.65047	3.02506e-23
GO:0006974	response to DNA damage stimulus	34	5.78919	2.97523e-18
GO:0033554	cellular response to stress	6	0.418496	1.1463e-07
GO:0006259	DNA metabolic process	4	0.906741	0.0101359
Cluster 12: regulation of vulval development
observed gene count: 75
expected gene count: 13.880107958601
uncorrected p-value: 1.49150204032836e-35
GO ID	term	observed gene count	expected gene count	uncorrected p-value
GO:0040027	negative regulation of vulval development	73	12.9036	3.2694e-36
GO:0040028	regulation of vulval development	2	1.25549	0.360576
Cluster 13: oogenesis
observed gene count: 87
expected gene count: 18.7625579942898
uncorrected p-value: 4.42204700929664e-35
GO ID	term	observed gene count	expected gene count	uncorrected p-value
GO:0048477	oogenesis	58	13.1129	1.04937e-22
GO:0007276	gamete generation	31	5.92869	4.34794e-15
GO:0019953	sexual reproduction	1	0.139499	0.134635
Cluster 14: gastrulation
observed gene count: 43
expected gene count: 6.97492862241256
uncorrected p-value: 1.02920546636129e-23
GO ID	term	observed gene count	expected gene count	uncorrected p-value
GO:0001703	gastrulation with mouth forming first	34	4.46395	8.18809e-23
GO:0048598	embryonic morphogenesis	7	2.30173	0.00681231
GO:0007369	gastrulation	2	0.209248	0.0139125
Cluster 15: gonad development
observed gene count: 49
expected gene count: 9.20690578158458
uncorrected p-value: 2.16964469759014e-23
GO ID	term	observed gene count	expected gene count	uncorrected p-value
GO:0008406	gonad development	49	9.20691	2.16964e-23
Cluster 16: oviposition
observed gene count: 77
expected gene count: 23.0870137401856
uncorrected p-value: 3.72174648958408e-21
GO ID	term	observed gene count	expected gene count	uncorrected p-value
GO:0018991	oviposition	71	22.25	1.70178e-18
GO:0032504	multicellular organism reproduction	5	0.488245	3.06718e-05
GO:0048609	reproductive process in a multicellular organism	2	0.348746	0.0422025
Cluster 17: cytoskeleton organization
observed gene count: 41
expected gene count: 7.60267219842969
uncorrected p-value: 4.62096365295756e-20
GO ID	term	observed gene count	expected gene count	uncorrected p-value
GO:0007052	mitotic spindle organization	35	5.0917	1.65472e-21
GO:0000226	microtubule cytoskeleton organization	5	0.557994	7.7061e-05
GO:0007017	microtubule-based process	6	1.74373	0.00640234
GO:0007010	cytoskeleton organization	2	0.697493	0.150832
Cluster 18: sex determination
observed gene count: 27
expected gene count: 3.41771502498216
uncorrected p-value: 5.8512899211159e-19
GO ID	term	observed gene count	expected gene count	uncorrected p-value
GO:0040022	feminization of hermaphroditic germ-line	17	2.23198	4.30751e-12
GO:0042006	masculinization of hermaphroditic germ-line	7	0.836991	4.61984e-06
GO:0018992	germ-line sex determination	2	0.139499	0.00486352
GO:0007530	sex determination	2	0.209248	0.0139125
GO:0040021	hermaphrodite germ-line sex determination	2	0.209248	0.0139125
Cluster 19: cell morphogenesis
observed gene count: 28
expected gene count: 3.97570931477516
uncorrected p-value: 7.54284104167538e-18
GO ID	term	observed gene count	expected gene count	uncorrected p-value
GO:0000132	establishment of mitotic spindle orientation	17	1.95298	2.14283e-13
GO:0040001	establishment of mitotic spindle localization	5	0.488245	3.06718e-05
GO:0030010	establishment of cell polarity	5	0.557994	7.7061e-05
GO:0007163	establishment or maintenance of cell polarity	5	0.836991	0.000859734
GO:0000902	cell morphogenesis	2	0.627744	0.126278
Cluster 20: cell migration
observed gene count: 35
expected gene count: 7.53292291220557
uncorrected p-value: 5.07315283556051e-15
GO ID	term	observed gene count	expected gene count	uncorrected p-value
GO:0016477	cell migration	35	7.53292	5.07315e-15
Cluster 21: RNA splicing
observed gene count: 24
expected gene count: 3.55721359743041
uncorrected p-value: 5.81492561063242e-15
GO ID	term	observed gene count	expected gene count	uncorrected p-value
GO:0006396	RNA processing	17	2.23198	4.30751e-12
GO:0006397	mRNA processing	6	1.04624	0.000330765
GO:0008380	RNA splicing	1	0.139499	0.134635
GO:0016071	mRNA metabolic process	1	0.209248	0.194996
Cluster 22: cell fate determination
observed gene count: 20
expected gene count: 2.65047287651677
uncorrected p-value: 6.90079976735872e-14
GO ID	term	observed gene count	expected gene count	uncorrected p-value
GO:0045167	asymmetric protein localization involved in cell fate determination	12	1.25549	1.62185e-10
GO:0008105	asymmetric protein localization	6	0.97649	0.000210909
GO:0032970	regulation of actin filament-based process	3	0.348746	0.00304574
GO:0001709	cell fate determination	2	0.348746	0.0422025
Cluster 23: asymmetric cell division
observed gene count: 16
expected gene count: 1.67398286937902
uncorrected p-value: 1.29752049484938e-13
GO ID	term	observed gene count	expected gene count	uncorrected p-value
GO:0008356	asymmetric cell division	9	1.04624	1.31349e-07
GO:0042078	germ-line stem cell division	7	0.627744	2.53405e-07
Cluster 24: molting cycle
observed gene count: 54
expected gene count: 18.6928087080657
uncorrected p-value: 1.42052551674891e-12
GO ID	term	observed gene count	expected gene count	uncorrected p-value
GO:0018996	molting cycle, collagen and cuticulin-based cuticle	54	18.6928	1.42053e-12
GO:0042303	molting cycle	1	0.0697493	0.0697493
Cluster 25: regulation of multicellular organism growth
observed gene count: 64
expected gene count: 24.6214980371163
uncorrected p-value: 1.9077123933398e-12
GO ID	term	observed gene count	expected gene count	uncorrected p-value
GO:0040018	positive regulation of multicellular organism growth	62	23.5753	2.49315e-12
GO:0040014	regulation of multicellular organism growth	2	1.67398	0.506333
Cluster 26: endocytosis
observed gene count: 39
expected gene count: 10.9506379371877
uncorrected p-value: 2.1460810225414e-12
GO ID	term	observed gene count	expected gene count	uncorrected p-value
GO:0043652	engulfment of apoptotic cell	22	5.71944	2.84507e-08
GO:0016192	vesicle-mediated transport	12	3.62696	0.000193594
GO:0006897	endocytosis	5	1.04624	0.00273188
Cluster 27: protein complex assembly
observed gene count: 25
expected gene count: 4.95219932191292
uncorrected p-value: 4.72992512904628e-12
GO ID	term	observed gene count	expected gene count	uncorrected p-value
GO:0006352	transcription initiation	7	0.836991	4.61984e-06
GO:0006351	transcription, DNA-dependent	11	2.37148	1.18639e-05
GO:0006367	transcription initiation from RNA polymerase II promoter	6	0.836991	7.33123e-05
GO:0006461	protein complex assembly	1	0.139499	0.134635
GO:0006366	transcription from RNA polymerase II promoter	1	0.906741	0.60939
Cluster 28: protein transport
observed gene count: 37
expected gene count: 10.3228943611706
uncorrected p-value: 6.34357821546865e-12
GO ID	term	observed gene count	expected gene count	uncorrected p-value
GO:0006886	intracellular protein transport	17	4.18496	4.47313e-07
GO:0008104	protein localization	11	2.16223	4.2689e-06
GO:0046907	intracellular transport	2	0.278997	0.0265398
GO:0015031	protein transport	8	3.97571	0.043288
Cluster 29: fertilization
observed gene count: 22
expected gene count: 4.60345289079229
uncorrected p-value: 3.03129192839029e-10
GO ID	term	observed gene count	expected gene count	uncorrected p-value
GO:0035046	pronuclear migration	21	3.62696	1.12395e-11
GO:0051647	nucleus localization	1	0.0697493	0.0697493
GO:0009566	fertilization	1	0.139499	0.134635
Cluster 30: germline cell cycle switching, mitotic to meiotic cell cycle
observed gene count: 16
expected gene count: 2.4412250178444
uncorrected p-value: 3.41428864838814e-10
GO ID	term	observed gene count	expected gene count	uncorrected p-value
GO:0051729	germline cell cycle switching, mitotic to meiotic cell cycle	16	2.44123	3.41429e-10
Cluster 31: proteolysis
observed gene count: 75
expected gene count: 35.2233895431834
uncorrected p-value: 5.24265336071404e-10
GO ID	term	observed gene count	expected gene count	uncorrected p-value
GO:0006511	ubiquitin-dependent protein catabolic process	24	5.16145	9.18396e-11
GO:0006508	proteolysis	37	21.413	0.000860474
GO:0051603	proteolysis involved in cellular protein catabolic process	5	0.97649	0.00193151
GO:0030163	protein catabolic process	16	8.78841	0.014512
Cluster 32: embryonic axis specification
observed gene count: 17
expected gene count: 2.85972073518915
uncorrected p-value: 6.28657923449313e-10
GO ID	term	observed gene count	expected gene count	uncorrected p-value
GO:0009880	embryonic pattern specification	8	0.836991	2.13073e-07
GO:0009949	polarity specification of anterior/posterior axis	3	0.488245	0.00958466
GO:0008595	determination of anterior/posterior axis, embryo	2	0.348746	0.0422025
GO:0009952	anterior/posterior pattern formation	3	0.906741	0.057218
GO:0000578	embryonic axis specification	1	0.139499	0.134635
Cluster 33: mitosis
observed gene count: 20
expected gene count: 3.97570931477516
uncorrected p-value: 6.83039916891825e-10
GO ID	term	observed gene count	expected gene count	uncorrected p-value
GO:0007067	mitosis	17	3.55721	3.12368e-08
GO:0000087	M phase of mitotic cell cycle	3	0.348746	0.00304574
GO:0000280	nuclear division	1	0.0697493	0.0697493
Cluster 34: nuclear mRNA splicing, via spliceosome
observed gene count: 12
expected gene count: 1.39498572448251
uncorrected p-value: 9.64205815096474e-10
GO ID	term	observed gene count	expected gene count	uncorrected p-value
GO:0000398	nuclear mRNA splicing, via spliceosome	12	1.39499	9.64206e-10
Cluster 35: negative regulation of multicellular organism growth
observed gene count: 26
expected gene count: 6.69593147751606
uncorrected p-value: 1.29465436273769e-09
GO ID	term	observed gene count	expected gene count	uncorrected p-value
GO:0040015	negative regulation of multicellular organism growth	26	6.69593	1.29465e-09
Cluster 36: kinetochore organization
observed gene count: 12
expected gene count: 1.53448429693076
uncorrected p-value: 4.33691316644927e-09
GO ID	term	observed gene count	expected gene count	uncorrected p-value
GO:0000070	mitotic sister chromatid segregation	12	1.32524	4.12043e-10
GO:0051383	kinetochore organization	2	0.139499	0.00486352
Cluster 37: DNA replication initiation
observed gene count: 7
expected gene count: 0.488245003568879
uncorrected p-value: 7.98110819397086e-09
GO ID	term	observed gene count	expected gene count	uncorrected p-value
GO:0006270	DNA replication initiation	7	0.488245	7.98111e-09
Cluster 38: RNA catabolic process
observed gene count: 11
expected gene count: 1.32523643825839
uncorrected p-value: 8.35301732710276e-09
GO ID	term	observed gene count	expected gene count	uncorrected p-value
GO:0006401	RNA catabolic process	4	0.348746	0.000111545
GO:0006402	mRNA catabolic process	3	0.278997	0.00128522
GO:0000184	nuclear-transcribed mRNA catabolic process, nonsense-mediated decay	3	0.488245	0.00958466
GO:0000956	nuclear-transcribed mRNA catabolic process	2	0.278997	0.0265398
Cluster 39: collagen and cuticulin-based cuticle development
observed gene count: 25
expected gene count: 6.97492862241256
uncorrected p-value: 1.58155045145266e-08
GO ID	term	observed gene count	expected gene count	uncorrected p-value
GO:0040002	collagen and cuticulin-based cuticle development	25	6.90518	1.27004e-08
Cluster 40: cell cycle checkpoint
observed gene count: 9
expected gene count: 0.906740720913633
uncorrected p-value: 2.13457386878032e-08
GO ID	term	observed gene count	expected gene count	uncorrected p-value
GO:0007346	regulation of mitotic cell cycle	3	0.209248	0.000339025
GO:0007094	mitotic cell cycle spindle assembly checkpoint	3	0.348746	0.00304574
GO:0000075	cell cycle checkpoint	1	0.0697493	0.0697493
GO:0030071	regulation of mitotic metaphase/anaphase transition	1	0.0697493	0.0697493
GO:0051783	regulation of nuclear division	1	0.209248	0.194996
Cluster 41: negative regulation of transcription, DNA-dependent
observed gene count: 17
expected gene count: 3.76646145610278
uncorrected p-value: 8.1500743507833e-08
GO ID	term	observed gene count	expected gene count	uncorrected p-value
GO:0000122	negative regulation of transcription from RNA polymerase II promoter	13	2.78997	1.81153e-06
GO:0045892	negative regulation of transcription, DNA-dependent	4	0.697493	0.00352473
Cluster 42: female meiosis
observed gene count: 9
expected gene count: 1.04623929336188
uncorrected p-value: 1.3134916234907e-07
GO ID	term	observed gene count	expected gene count	uncorrected p-value
GO:0040038	polar body extrusion after meiotic divisions	7	0.836991	4.61984e-06
GO:0007143	female meiosis	2	0.209248	0.0139125
Cluster 43: tRNA processing
observed gene count: 9
expected gene count: 1.18573786581014
uncorrected p-value: 5.60926750878869e-07
GO ID	term	observed gene count	expected gene count	uncorrected p-value
GO:0008033	tRNA processing	9	1.18574	5.60927e-07
Cluster 44: centrosome cycle
observed gene count: 6
expected gene count: 0.488245003568879
uncorrected p-value: 7.54525427516908e-07
GO ID	term	observed gene count	expected gene count	uncorrected p-value
GO:0007099	centriole replication	4	0.348746	0.000111545
GO:0007098	centrosome cycle	3	0.209248	0.000339025
Cluster 45: digestive tract morphogenesis
observed gene count: 8
expected gene count: 0.976490007137759
uncorrected p-value: 1.13823497261905e-06
GO ID	term	observed gene count	expected gene count	uncorrected p-value
GO:0048557	embryonic digestive tract morphogenesis	7	0.697493	7.93343e-07
GO:0048546	digestive tract morphogenesis	1	0.278997	0.251149
Cluster 46: regulation of apoptosis
observed gene count: 14
expected gene count: 3.13871788008565
uncorrected p-value: 1.32489514161876e-06
GO ID	term	observed gene count	expected gene count	uncorrected p-value
GO:0043066	negative regulation of apoptosis	7	0.97649	1.76681e-05
GO:0008630	DNA damage response, signal transduction resulting in induction of apoptosis	3	0.278997	0.00128522
GO:0042771	DNA damage response, signal transduction by p53 class mediator resulting in induction of apoptosis	3	0.348746	0.00304574
GO:0042981	regulation of apoptosis	2	0.418496	0.060416
GO:0043069	negative regulation of programmed cell death	1	0.209248	0.194996
GO:0043065	positive regulation of apoptosis	1	0.418496	0.351979
Cluster 47: lipid biosynthetic process
observed gene count: 12
expected gene count: 2.7202221627409
uncorrected p-value: 8.57214274665686e-06
GO ID	term	observed gene count	expected gene count	uncorrected p-value
GO:0006506	GPI anchor biosynthetic process	6	0.767242	3.89661e-05
GO:0008654	phospholipid biosynthetic process	4	0.836991	0.00742237
GO:0006505	GPI anchor metabolic process	1	0.139499	0.134635
GO:0008610	lipid biosynthetic process	1	0.348746	0.303385
Cluster 48: kinetochore assembly
observed gene count: 5
expected gene count: 0.418495717344754
uncorrected p-value: 9.3023109934665e-06
GO ID	term	observed gene count	expected gene count	uncorrected p-value
GO:0051382	kinetochore assembly	3	0.278997	0.00128522
GO:0051383	kinetochore organization	2	0.139499	0.00486352
Cluster 49: nucleosome assembly
observed gene count: 19
expected gene count: 6.48668361884368
uncorrected p-value: 1.94387709961379e-05
GO ID	term	observed gene count	expected gene count	uncorrected p-value
GO:0006334	nucleosome assembly	17	6.20769	0.000126153
GO:0006461	protein complex assembly	1	0.139499	0.134635
GO:0006333	chromatin assembly or disassembly	1	0.139499	0.134635
Cluster 50: DNA topological change
observed gene count: 5
expected gene count: 0.488245003568879
uncorrected p-value: 3.06717749083405e-05
GO ID	term	observed gene count	expected gene count	uncorrected p-value
GO:0006265	DNA topological change	5	0.488245	3.06718e-05
Cluster 51: telomere maintenance
observed gene count: 5
expected gene count: 0.488245003568879
uncorrected p-value: 3.06717749083405e-05
GO ID	term	observed gene count	expected gene count	uncorrected p-value
GO:0000723	telomere maintenance	5	0.488245	3.06718e-05
Cluster 52: exocytosis
observed gene count: 18
expected gene count: 6.13793718772305
uncorrected p-value: 3.13338278779183e-05
GO ID	term	observed gene count	expected gene count	uncorrected p-value
GO:0032940	secretion by cell	15	5.2312	0.000181666
GO:0006904	vesicle docking during exocytosis	2	0.557994	0.102816
GO:0006887	exocytosis	1	0.278997	0.251149
Cluster 53: gonad morphogenesis
observed gene count: 14
expected gene count: 4.18495717344754
uncorrected p-value: 5.1071822573304e-05
GO ID	term	observed gene count	expected gene count	uncorrected p-value
GO:0035262	gonad morphogenesis	9	1.81348	4.04933e-05
GO:0030334	regulation of cell migration	11	3.13872	0.000206232
Cluster 54: protein ubiquitination
observed gene count: 7
expected gene count: 1.11598857958601
uncorrected p-value: 5.19914957931546e-05
GO ID	term	observed gene count	expected gene count	uncorrected p-value
GO:0016567	protein ubiquitination	7	1.11599	5.19915e-05
Cluster 55: nuclear import
observed gene count: 8
expected gene count: 1.53448429693076
uncorrected p-value: 7.30337352630578e-05
GO ID	term	observed gene count	expected gene count	uncorrected p-value
GO:0006606	protein import into nucleus	2	0.209248	0.0139125
GO:0033365	protein localization in organelle	3	0.557994	0.0145459
GO:0006913	nucleocytoplasmic transport	2	0.348746	0.0422025
GO:0051170	nuclear import	1	0.139499	0.134635
Cluster 56: rRNA processing
observed gene count: 9
expected gene count: 1.95298001427552
uncorrected p-value: 7.87855438328908e-05
GO ID	term	observed gene count	expected gene count	uncorrected p-value
GO:0006364	rRNA processing	6	1.11599	0.00049803
GO:0042254	ribosome biogenesis	3	0.836991	0.0463529
Cluster 57: regulation of Notch signaling pathway
observed gene count: 7
expected gene count: 1.18573786581014
uncorrected p-value: 8.30537460259632e-05
GO ID	term	observed gene count	expected gene count	uncorrected p-value
GO:0045746	negative regulation of Notch signaling pathway	3	0.348746	0.00304574
GO:0008593	regulation of Notch signaling pathway	2	0.209248	0.0139125
GO:0046580	negative regulation of Ras protein signal transduction	3	0.627744	0.0206998
Cluster 58: SRP-dependent cotranslational protein targeting to membrane
observed gene count: 5
expected gene count: 0.627743576017131
uncorrected p-value: 0.000163377503754109
GO ID	term	observed gene count	expected gene count	uncorrected p-value
GO:0006614	SRP-dependent cotranslational protein targeting to membrane	5	0.557994	7.7061e-05
Cluster 59: protein amino acid phosphorylation
observed gene count: 50
expected gene count: 29.5039480728051
uncorrected p-value: 0.000195042492841131
GO ID	term	observed gene count	expected gene count	uncorrected p-value
GO:0006468	protein amino acid phosphorylation	50	29.3644	0.000173998
Cluster 60: negative regulation of transposition, DNA-mediated
observed gene count: 3
expected gene count: 0.209247858672377
uncorrected p-value: 0.000339024900978245
GO ID	term	observed gene count	expected gene count	uncorrected p-value
GO:0000335	negative regulation of transposition, DNA-mediated	3	0.209248	0.000339025
Cluster 61: chitin metabolic process
observed gene count: 6
expected gene count: 1.11598857958601
uncorrected p-value: 0.000498029882987502
GO ID	term	observed gene count	expected gene count	uncorrected p-value
GO:0006030	chitin metabolic process	5	0.97649	0.00193151
GO:0005976	polysaccharide metabolic process	1	0.139499	0.134635
Cluster 62: cell cycle checkpoint
observed gene count: 4
expected gene count: 0.488245003568879
uncorrected p-value: 0.000696505404483954
GO ID	term	observed gene count	expected gene count	uncorrected p-value
GO:0000077	DNA damage checkpoint	4	0.488245	0.000696505
GO:0000075	cell cycle checkpoint	1	0.0697493	0.0697493
Cluster 63: translation
observed gene count: 23
expected gene count: 11.7876293718772
uncorrected p-value: 0.00161503575735976
GO ID	term	observed gene count	expected gene count	uncorrected p-value
GO:0006418	tRNA aminoacylation for protein translation	10	2.02273	1.56765e-05
GO:0043039	tRNA aminoacylation	5	0.557994	7.7061e-05
GO:0006412	translation	11	9.6254	0.368348
Cluster 64: response to heat
observed gene count: 8
expected gene count: 2.37147573162027
uncorrected p-value: 0.00195410516311006
GO ID	term	observed gene count	expected gene count	uncorrected p-value
GO:0009408	response to heat	7	2.30173	0.00681231
GO:0009266	response to temperature stimulus	1	0.0697493	0.0697493
Cluster 65: regulation of transcription, DNA-dependent
observed gene count: 61
expected gene count: 42.4075660242684
uncorrected p-value: 0.00288289345159164
GO ID	term	observed gene count	expected gene count	uncorrected p-value
GO:0006355	regulation of transcription, DNA-dependent	61	42.4076	0.00288289
Cluster 66: regulation of Rab GTPase activity
observed gene count: 8
expected gene count: 2.58072359029265
uncorrected p-value: 0.00344798556230724
GO ID	term	observed gene count	expected gene count	uncorrected p-value
GO:0032313	regulation of Rab GTPase activity	5	1.46474	0.0130438
GO:0051056	regulation of small GTPase mediated signal transduction	3	0.97649	0.0691635
Cluster 67: cellular homeostasis
observed gene count: 9
expected gene count: 3.41771502498216
uncorrected p-value: 0.0062188456389534
GO ID	term	observed gene count	expected gene count	uncorrected p-value
GO:0045454	cell redox homeostasis	8	3.20847	0.0133667
GO:0019725	cellular homeostasis	1	0.139499	0.134635
Cluster 68: dsRNA fragmentation
observed gene count: 2
expected gene count: 0.209247858672377
uncorrected p-value: 0.013912497056464
GO ID	term	observed gene count	expected gene count	uncorrected p-value
GO:0031050	dsRNA fragmentation	1	0.0697493	0.0697493
GO:0031053	primary microRNA processing	1	0.0697493	0.0697493
Cluster 69: positive regulation of transcription, DNA-dependent
observed gene count: 11
expected gene count: 5.4404443254818
uncorrected p-value: 0.0192125928485022
GO ID	term	observed gene count	expected gene count	uncorrected p-value
GO:0045893	positive regulation of transcription, DNA-dependent	3	0.418496	0.00577545
GO:0045944	positive regulation of transcription from RNA polymerase II promoter	8	4.9522	0.120574
Cluster 70: nucleoside metabolic process
observed gene count: 3
expected gene count: 0.627743576017131
uncorrected p-value: 0.0206998246830495
GO ID	term	observed gene count	expected gene count	uncorrected p-value
GO:0009116	nucleoside metabolic process	3	0.627744	0.0206998
Cluster 71: anion transport
observed gene count: 4
expected gene count: 1.18573786581014
uncorrected p-value: 0.0269959276560959
GO ID	term	observed gene count	expected gene count	uncorrected p-value
GO:0006821	chloride transport	3	0.767242	0.0366202
GO:0006820	anion transport	1	0.418496	0.351979
Cluster 72: sulfur metabolic process
observed gene count: 2
expected gene count: 0.348746431120628
uncorrected p-value: 0.042202459125186
GO ID	term	observed gene count	expected gene count	uncorrected p-value
GO:0006555	methionine metabolic process	1	0.0697493	0.0697493
GO:0006790	sulfur metabolic process	1	0.139499	0.134635
Cluster 73: meiotic chromosome movement towards spindle pole
observed gene count: 1
expected gene count: 0.0697492862241256
uncorrected p-value: 0.0697492862241255
GO ID	term	observed gene count	expected gene count	uncorrected p-value
GO:0016344	meiotic chromosome movement towards spindle pole	1	0.0697493	0.0697493
Cluster 74: synapsis
observed gene count: 1
expected gene count: 0.0697492862241256
uncorrected p-value: 0.0697492862241255
GO ID	term	observed gene count	expected gene count	uncorrected p-value
GO:0007129	synapsis	1	0.0697493	0.0697493
Cluster 75: proton transport
observed gene count: 46
expected gene count: 37.3856174161313
uncorrected p-value: 0.0860821579219242
GO ID	term	observed gene count	expected gene count	uncorrected p-value
GO:0009165	nucleotide biosynthetic process	2	0.209248	0.0139125
GO:0006812	cation transport	9	3.97571	0.016548
GO:0055085	transmembrane transport	34	24.6912	0.0371061
GO:0009150	purine ribonucleotide metabolic process	1	0.0697493	0.0697493
GO:0015986	ATP synthesis coupled proton transport	3	1.18574	0.110842
GO:0015672	monovalent inorganic cation transport	1	0.278997	0.251149
GO:0046034	ATP metabolic process	1	0.488245	0.397184
GO:0015992	proton transport	1	0.557994	0.439236
Cluster 76: pteridine and derivative metabolic process
observed gene count: 2
expected gene count: 0.557994289793005
uncorrected p-value: 0.102816017823526
GO ID	term	observed gene count	expected gene count	uncorrected p-value
GO:0042558	pteridine and derivative metabolic process	1	0.0697493	0.0697493
GO:0032324	molybdopterin cofactor biosynthetic process	1	0.139499	0.134635
GO:0006777	Mo-molybdopterin cofactor biosynthetic process	1	0.488245	0.397184
Cluster 77: tricarboxylic acid cycle
observed gene count: 3
expected gene count: 1.25548715203426
uncorrected p-value: 0.12644197254585
GO ID	term	observed gene count	expected gene count	uncorrected p-value
GO:0006084	acetyl-CoA metabolic process	1	0.139499	0.134635
GO:0006099	tricarboxylic acid cycle	2	0.906741	0.228542
Cluster 78: axonogenesis
observed gene count: 9
expected gene count: 5.9984386152748
uncorrected p-value: 0.14481128021431
GO ID	term	observed gene count	expected gene count	uncorrected p-value
GO:0031175	neuron projection development	2	0.348746	0.0422025
GO:0048858	cell projection morphogenesis	1	0.209248	0.194996
GO:0007411	axon guidance	5	3.90596	0.352014
GO:0007409	axonogenesis	1	0.488245	0.397184
GO:0048666	neuron development	1	0.767242	0.548601
Cluster 79: mitochondrial transport
observed gene count: 2
expected gene count: 0.836991434689508
uncorrected p-value: 0.202184428996257
GO ID	term	observed gene count	expected gene count	uncorrected p-value
GO:0006839	mitochondrial transport	1	0.0697493	0.0697493
GO:0006626	protein targeting to mitochondrion	1	0.139499	0.134635
Cluster 80: hexose metabolic process
observed gene count: 3
expected gene count: 1.67398286937902
uncorrected p-value: 0.232606139743787
GO ID	term	observed gene count	expected gene count	uncorrected p-value
GO:0019318	hexose metabolic process	2	0.139499	0.00486352
GO:0006006	glucose metabolic process	1	0.418496	0.351979
Cluster 81: protein amino acid glycosylation
observed gene count: 4
expected gene count: 2.51097430406852
uncorrected p-value: 0.240756638780195
GO ID	term	observed gene count	expected gene count	uncorrected p-value
GO:0006486	protein amino acid glycosylation	4	2.37148	0.210372
Cluster 82: positive regulation of protein kinase activity
observed gene count: 1
expected gene count: 0.488245003568879
uncorrected p-value: 0.397183919401318
GO ID	term	observed gene count	expected gene count	uncorrected p-value
GO:0045860	positive regulation of protein kinase activity	1	0.278997	0.251149
Cluster 83: glycerol metabolic process
observed gene count: 1
expected gene count: 0.488245003568879
uncorrected p-value: 0.397183919401318
GO ID	term	observed gene count	expected gene count	uncorrected p-value
GO:0006071	glycerol metabolic process	1	0.488245	0.397184
Cluster 84: defecation
observed gene count: 3
expected gene count: 3.06896859386153
uncorrected p-value: 0.600667151629194
GO ID	term	observed gene count	expected gene count	uncorrected p-value
GO:0030421	defecation	3	2.85972	0.552041
Cluster 85: synaptic vesicle transport
observed gene count: 3
expected gene count: 3.2782164525339
uncorrected p-value: 0.645680802521072
GO ID	term	observed gene count	expected gene count	uncorrected p-value
GO:0048489	synaptic vesicle transport	2	0.97649	0.255105
GO:0006836	neurotransmitter transport	1	1.25549	0.727925

## Sheet: N2_4cell_EE_RZ-56
sample name: N2_4cell_EE_RZ-56
number of associated genes in the sample: 3218
Cluster 1: growth
observed gene count: 1067
expected gene count: 271.612062812277
uncorrected p-value: 0
GO ID	term	observed gene count	expected gene count	uncorrected p-value
GO:0009792	embryonic development ending in birth or egg hatching	922	211.102	0
GO:0002119	nematode larval development	514	132.002	1.73302e-171
GO:0040007	growth	452	109.104	2.62908e-161
GO:0040010	positive regulation of growth rate	427	108.315	3.16956e-143
GO:0002164	larval development	1	0.0717791	0.0717791
GO:0045927	positive regulation of growth	1	0.0717791	0.0717791
GO:0009791	post-embryonic development	3	1.14847	0.102622
GO:0040009	regulation of growth rate	1	0.143558	0.138407
Cluster 2: hermaphrodite genitalia development (genitalia development)
observed gene count: 231
expected gene count: 52.3269539614561
uncorrected p-value: 3.37915868384967e-87
GO ID	term	observed gene count	expected gene count	uncorrected p-value
GO:0040035	hermaphrodite genitalia development	231	51.6092	1.45938e-88
Cluster 3: meiosis
observed gene count: 84
expected gene count: 14.427596359743
uncorrected p-value: 7.88918045663889e-43
GO ID	term	observed gene count	expected gene count	uncorrected p-value
GO:0045132	meiotic chromosome segregation	55	8.32637	5.12282e-32
GO:0007126	meiosis	44	8.54171	1.36285e-20
GO:0007049	cell cycle	9	1.14847	3.59623e-07
GO:0007059	chromosome segregation	6	1.00491	0.000246908
Cluster 4: determination of adult life span (aging)
observed gene count: 177
expected gene count: 58.3563972162741
uncorrected p-value: 3.73333018066438e-41
GO ID	term	observed gene count	expected gene count	uncorrected p-value
GO:0008340	determination of adult life span	177	58.2846	3.13547e-41
Cluster 5: epithelium development
observed gene count: 101
expected gene count: 26.7018201284797
uncorrected p-value: 3.33374750064961e-32
GO ID	term	observed gene count	expected gene count	uncorrected p-value
GO:0002009	morphogenesis of an epithelium	100	26.5583	1.0155e-31
GO:0060429	epithelium development	1	0.0717791	0.0717791
Cluster 6: apoptosis (DNA catabolism)
observed gene count: 109
expected gene count: 32.0852516059957
uncorrected p-value: 3.38729501280081e-30
GO ID	term	observed gene count	expected gene count	uncorrected p-value
GO:0006915	apoptosis	102	30.219	4.22942e-28
GO:0006997	nucleus organization	9	2.15337	0.000178702
GO:0006309	DNA fragmentation involved in apoptosis	4	0.78957	0.00580244
GO:0000737	DNA catabolic process, endonucleolytic	3	0.430675	0.00626461
Cluster 7: apoptosis
observed gene count: 111
expected gene count: 34.310403283369
uncorrected p-value: 9.47780255604741e-29
GO ID	term	observed gene count	expected gene count	uncorrected p-value
GO:0006915	apoptosis	102	30.219	4.22942e-28
GO:0012501	programmed cell death	3	1.00491	0.0741141
GO:0008219	cell death	6	3.87607	0.189194
Cluster 8: regulation of vulval development
observed gene count: 67
expected gene count: 14.2840381870093
uncorrected p-value: 8.64047722910369e-28
GO ID	term	observed gene count	expected gene count	uncorrected p-value
GO:0040027	negative regulation of vulval development	66	13.2791	4.38971e-29
GO:0040028	regulation of vulval development	1	1.29202	0.738417
Cluster 9: oogenesis
observed gene count: 80
expected gene count: 20.0263650963597
uncorrected p-value: 1.58075536854792e-27
GO ID	term	observed gene count	expected gene count	uncorrected p-value
GO:0048477	oogenesis	57	13.4945	2.48679e-21
GO:0007276	gamete generation	19	6.10122	7.43494e-06
GO:0032504	multicellular organism reproduction	4	0.502454	0.000777231
GO:0048609	reproductive process in a multicellular organism	1	0.358895	0.310952
Cluster 10: oocyte maturation
observed gene count: 55
expected gene count: 10.3361884368308
uncorrected p-value: 3.44346546000071e-26
GO ID	term	observed gene count	expected gene count	uncorrected p-value
GO:0007281	germ cell development	45	7.8957	3.76318e-23
GO:0001556	oocyte maturation	6	1.29202	0.00118869
GO:0048599	oocyte development	4	1.3638	0.0430734
Cluster 11: transcription initiation
observed gene count: 38
expected gene count: 5.09631513204854
uncorrected p-value: 4.84329797709439e-25
GO ID	term	observed gene count	expected gene count	uncorrected p-value
GO:0006351	transcription, DNA-dependent	21	2.44049	3.30563e-16
GO:0006367	transcription initiation from RNA polymerase II promoter	10	0.861349	2.06757e-10
GO:0006352	transcription initiation	6	0.861349	8.61378e-05
GO:0006366	transcription from RNA polymerase II promoter	2	0.933128	0.238538
Cluster 12: regulation of meiosis
observed gene count: 43
expected gene count: 7.4650249821556
uncorrected p-value: 2.08733810826189e-22
GO ID	term	observed gene count	expected gene count	uncorrected p-value
GO:0042127	regulation of cell proliferation	35	6.38834	1.11775e-17
GO:0040020	regulation of meiosis	33	6.02944	9.79193e-17
GO:0051726	regulation of cell cycle	7	0.933128	1.13673e-05
GO:0045836	positive regulation of meiosis	2	0.215337	0.0147132
Cluster 13: DNA repair
observed gene count: 47
expected gene count: 9.11594396859386
uncorrected p-value: 6.49165039764776e-22
GO ID	term	observed gene count	expected gene count	uncorrected p-value
GO:0006281	DNA repair	20	2.72761	1.1821e-13
GO:0006974	response to DNA damage stimulus	26	5.95766	6.96888e-11
GO:0006259	DNA metabolic process	5	0.933128	0.00149885
GO:0033554	cellular response to stress	2	0.430675	0.0636287
Cluster 14: gonad development
observed gene count: 44
expected gene count: 9.47483940042827
uncorrected p-value: 1.43994597751299e-18
GO ID	term	observed gene count	expected gene count	uncorrected p-value
GO:0008406	gonad development	44	9.47484	1.43995e-18
Cluster 15: gene silencing
observed gene count: 44
expected gene count: 10.264409350464
uncorrected p-value: 4.48445760812514e-17
GO ID	term	observed gene count	expected gene count	uncorrected p-value
GO:0016246	RNA interference	44	9.76196	5.27484e-18
GO:0000335	negative regulation of transposition, DNA-mediated	3	0.215337	0.000369503
GO:0016458	gene silencing	2	0.215337	0.0147132
Cluster 16: nucleosome assembly
observed gene count: 37
expected gene count: 7.53680406852248
uncorrected p-value: 9.45127386949798e-17
GO ID	term	observed gene count	expected gene count	uncorrected p-value
GO:0006334	nucleosome assembly	30	6.38834	2.83491e-13
GO:0006333	chromatin assembly or disassembly	2	0.143558	0.00515075
GO:0016568	chromatin modification	3	0.430675	0.00626461
GO:0051276	chromosome organization	2	0.574233	0.107995
Cluster 17: embryonic morphogenesis
observed gene count: 34
expected gene count: 7.17790863668808
uncorrected p-value: 5.62034985515084e-15
GO ID	term	observed gene count	expected gene count	uncorrected p-value
GO:0001703	gastrulation with mouth forming first	28	4.59386	7.19639e-16
GO:0048598	embryonic morphogenesis	6	2.36871	0.0281886
Cluster 18: spermatogenesis
observed gene count: 26
expected gene count: 4.88097787294789
uncorrected p-value: 3.65053036877044e-13
GO ID	term	observed gene count	expected gene count	uncorrected p-value
GO:0040022	feminization of hermaphroditic germ-line	13	2.29693	1.24147e-07
GO:0042006	masculinization of hermaphroditic germ-line	6	0.861349	8.61378e-05
GO:0007283	spermatogenesis	8	1.93804	0.000449339
GO:0018992	germ-line sex determination	2	0.143558	0.00515075
GO:0040021	hermaphrodite germ-line sex determination	2	0.215337	0.0147132
GO:0007530	sex determination	1	0.215337	0.200255
Cluster 19: oviposition
observed gene count: 63
expected gene count: 23.7588775874375
uncorrected p-value: 1.06094474827436e-12
GO ID	term	observed gene count	expected gene count	uncorrected p-value
GO:0018991	oviposition	59	22.8975	1.85752e-11
GO:0032504	multicellular organism reproduction	4	0.502454	0.000777231
GO:0048609	reproductive process in a multicellular organism	1	0.358895	0.310952
Cluster 20: regulation of multicellular organism growth
observed gene count: 64
expected gene count: 25.3380174875089
uncorrected p-value: 6.56780926215413e-12
GO ID	term	observed gene count	expected gene count	uncorrected p-value
GO:0040018	positive regulation of multicellular organism growth	61	24.2613	2.46472e-11
GO:0040014	regulation of multicellular organism growth	6	1.7227	0.00594119
Cluster 21: RNA splicing
observed gene count: 21
expected gene count: 3.66073340471092
uncorrected p-value: 1.23370099117538e-11
GO ID	term	observed gene count	expected gene count	uncorrected p-value
GO:0006396	RNA processing	13	2.29693	1.24147e-07
GO:0006397	mRNA processing	7	1.07669	3.74863e-05
GO:0008380	RNA splicing	1	0.143558	0.138407
Cluster 22: protein transport
observed gene count: 34
expected gene count: 10.6233047822984
uncorrected p-value: 1.0804954540016e-09
GO ID	term	observed gene count	expected gene count	uncorrected p-value
GO:0015031	protein transport	16	4.09141	1.62414e-06
GO:0006886	intracellular protein transport	13	4.30675	0.000276767
GO:0006605	protein targeting	2	0.215337	0.0147132
GO:0008104	protein localization	4	2.22515	0.179616
GO:0045184	establishment of protein localization	1	0.215337	0.200255
GO:0046907	intracellular transport	1	0.287116	0.257663
Cluster 23: tRNA processing
observed gene count: 17
expected gene count: 3.08650071377587
uncorrected p-value: 2.36009156715958e-09
GO ID	term	observed gene count	expected gene count	uncorrected p-value
GO:0008033	tRNA processing	11	1.22024	2.114e-09
GO:0042254	ribosome biogenesis	4	0.861349	0.00821359
GO:0006364	rRNA processing	3	1.14847	0.102622
Cluster 24: positive regulation of embryonic development
observed gene count: 13
expected gene count: 1.79447715917202
uncorrected p-value: 2.99818178766962e-09
GO ID	term	observed gene count	expected gene count	uncorrected p-value
GO:0040019	positive regulation of embryonic development	13	1.57914	3.52161e-10
Cluster 25: cellular homeostasis
observed gene count: 17
expected gene count: 3.51717523197716
uncorrected p-value: 2.40190943221379e-08
GO ID	term	observed gene count	expected gene count	uncorrected p-value
GO:0045454	cell redox homeostasis	16	3.30184	5.93738e-08
GO:0019725	cellular homeostasis	1	0.143558	0.138407
Cluster 26: proteolysis
observed gene count: 70
expected gene count: 36.2484386152748
uncorrected p-value: 1.02489817641204e-07
GO ID	term	observed gene count	expected gene count	uncorrected p-value
GO:0006511	ubiquitin-dependent protein catabolic process	30	5.31165	8.61019e-16
GO:0051603	proteolysis involved in cellular protein catabolic process	11	1.00491	7.61795e-11
GO:0030163	protein catabolic process	13	9.04416	0.118963
GO:0006508	proteolysis	23	22.0362	0.446757
Cluster 27: cell migration
observed gene count: 25
expected gene count: 7.75214132762313
uncorrected p-value: 1.41393868628279e-07
GO ID	term	observed gene count	expected gene count	uncorrected p-value
GO:0016477	cell migration	25	7.75214	1.41394e-07
Cluster 28: SRP-dependent cotranslational protein targeting to membrane
observed gene count: 7
expected gene count: 0.646011777301927
uncorrected p-value: 3.0864663391603e-07
GO ID	term	observed gene count	expected gene count	uncorrected p-value
GO:0006614	SRP-dependent cotranslational protein targeting to membrane	7	0.574233	7.31696e-08
Cluster 29: fertilization
observed gene count: 17
expected gene count: 4.73741970021413
uncorrected p-value: 2.86959753088211e-06
GO ID	term	observed gene count	expected gene count	uncorrected p-value
GO:0035046	pronuclear migration	16	3.73251	4.102e-07
GO:0009566	fertilization	1	0.143558	0.138407
GO:0007097	nuclear migration	1	0.430675	0.360417
Cluster 30: positive regulation of apoptosis
observed gene count: 11
expected gene count: 2.2251516773733
uncorrected p-value: 5.62950716125662e-06
GO ID	term	observed gene count	expected gene count	uncorrected p-value
GO:0042771	DNA damage response, signal transduction by p53 class mediator resulting in induction of apoptosis	5	0.358895	1.89992e-06
GO:0008630	DNA damage response, signal transduction resulting in induction of apoptosis	3	0.287116	0.00139851
GO:0043065	positive regulation of apoptosis	3	0.430675	0.00626461
GO:0043068	positive regulation of programmed cell death	1	0.717791	0.525234
Cluster 31: regulation of transcription, DNA-dependent
observed gene count: 72
expected gene count: 43.6416845110635
uncorrected p-value: 2.18461158678502e-05
GO ID	term	observed gene count	expected gene count	uncorrected p-value
GO:0006355	regulation of transcription, DNA-dependent	72	43.6417	2.18461e-05
Cluster 32: microtubule-based process
observed gene count: 21
expected gene count: 7.75214132762313
uncorrected p-value: 2.47530151892444e-05
GO ID	term	observed gene count	expected gene count	uncorrected p-value
GO:0007052	mitotic spindle organization	15	5.23987	0.000181265
GO:0007017	microtubule-based process	4	1.79448	0.100403
GO:0000226	microtubule cytoskeleton organization	2	0.574233	0.107995
GO:0007010	cytoskeleton organization	1	0.717791	0.525234
Cluster 33: protein amino acid deacetylation
observed gene count: 14
expected gene count: 4.01962883654532
uncorrected p-value: 3.06014243287858e-05
GO ID	term	observed gene count	expected gene count	uncorrected p-value
GO:0045892	negative regulation of transcription, DNA-dependent	5	0.717791	0.000352292
GO:0000122	negative regulation of transcription from RNA polymerase II promoter	8	2.87116	0.00676028
GO:0006476	protein amino acid deacetylation	1	0.0717791	0.0717791
Cluster 34: mitosis
observed gene count: 14
expected gene count: 4.09140792291221
uncorrected p-value: 3.78987276925699e-05
GO ID	term	observed gene count	expected gene count	uncorrected p-value
GO:0007067	mitosis	12	3.66073	0.000207812
GO:0000087	M phase of mitotic cell cycle	2	0.358895	0.0445073
GO:0000280	nuclear division	1	0.0717791	0.0717791
Cluster 35: protein processing
observed gene count: 6
expected gene count: 0.789569950035689
uncorrected p-value: 4.58665427047291e-05
GO ID	term	observed gene count	expected gene count	uncorrected p-value
GO:0006465	signal peptide processing	4	0.287116	2.64996e-05
GO:0016485	protein processing	2	0.287116	0.028028
Cluster 36: lipoprotein metabolic process
observed gene count: 11
expected gene count: 2.79938436830835
uncorrected p-value: 6.52131021933387e-05
GO ID	term	observed gene count	expected gene count	uncorrected p-value
GO:0006506	GPI anchor biosynthetic process	5	0.78957	0.000607646
GO:0008654	phospholipid biosynthetic process	4	0.861349	0.00821359
GO:0042157	lipoprotein metabolic process	1	0.143558	0.138407
GO:0046474	glycerophospholipid biosynthetic process	1	0.502454	0.406332
Cluster 37: protein targeting
observed gene count: 9
expected gene count: 1.93803533190578
uncorrected p-value: 7.12791323578182e-05
GO ID	term	observed gene count	expected gene count	uncorrected p-value
GO:0045039	protein import into mitochondrial inner membrane	2	0.143558	0.00515075
GO:0006605	protein targeting	2	0.215337	0.0147132
GO:0007005	mitochondrion organization	3	0.646012	0.0223485
GO:0006626	protein targeting to mitochondrion	1	0.143558	0.138407
GO:0033365	protein localization in organelle	1	0.574233	0.448952
Cluster 38: negative regulation of multicellular organism growth
observed gene count: 18
expected gene count: 6.89079229122056
uncorrected p-value: 0.000148896067778069
GO ID	term	observed gene count	expected gene count	uncorrected p-value
GO:0040015	negative regulation of multicellular organism growth	18	6.89079	0.000148896
Cluster 39: regulation of nuclear division
observed gene count: 6
expected gene count: 0.93312812276945
uncorrected p-value: 0.000150226728841142
GO ID	term	observed gene count	expected gene count	uncorrected p-value
GO:0007094	mitotic cell cycle spindle assembly checkpoint	3	0.358895	0.00330893
GO:0007346	regulation of mitotic cell cycle	2	0.215337	0.0147132
GO:0051783	regulation of nuclear division	1	0.215337	0.200255
Cluster 40: cell morphogenesis
observed gene count: 14
expected gene count: 4.73741970021413
uncorrected p-value: 0.000207088672189441
GO ID	term	observed gene count	expected gene count	uncorrected p-value
GO:0000132	establishment of mitotic spindle orientation	7	2.00981	0.00301447
GO:0030010	establishment of cell polarity	3	0.574233	0.0157286
GO:0007163	establishment or maintenance of cell polarity	3	0.861349	0.0498178
GO:0000902	cell morphogenesis	2	0.646012	0.132465
GO:0008105	asymmetric protein localization	2	1.00491	0.265942
GO:0040001	establishment of mitotic spindle localization	1	0.502454	0.406332
Cluster 41: molting cycle, collagen and cuticulin-based cuticle
observed gene count: 36
expected gene count: 19.2367951463241
uncorrected p-value: 0.000219583117989632
GO ID	term	observed gene count	expected gene count	uncorrected p-value
GO:0018996	molting cycle, collagen and cuticulin-based cuticle	36	19.2368	0.000219583
Cluster 42: digestive tract morphogenesis
observed gene count: 6
expected gene count: 1.00490720913633
uncorrected p-value: 0.00024690764602425
GO ID	term	observed gene count	expected gene count	uncorrected p-value
GO:0048557	embryonic digestive tract morphogenesis	5	0.717791	0.000352292
GO:0048546	digestive tract morphogenesis	1	0.287116	0.257663
Cluster 43: endocytosis
observed gene count: 16
expected gene count: 7.39324589578872
uncorrected p-value: 0.002730509880771
GO ID	term	observed gene count	expected gene count	uncorrected p-value
GO:0043652	engulfment of apoptotic cell	14	5.88589	0.00200062
GO:0006897	endocytosis	2	1.07669	0.293336
Cluster 44: protein ubiquitination
observed gene count: 5
expected gene count: 1.14846538187009
uncorrected p-value: 0.00424257253945123
GO ID	term	observed gene count	expected gene count	uncorrected p-value
GO:0016567	protein ubiquitination	5	1.14847	0.00424257
Cluster 45: embryonic axis specification
observed gene count: 7
expected gene count: 2.15337259100642
uncorrected p-value: 0.00456901413539515
GO ID	term	observed gene count	expected gene count	uncorrected p-value
GO:0009880	embryonic pattern specification	4	0.861349	0.00821359
GO:0000578	embryonic axis specification	1	0.143558	0.138407
GO:0009952	anterior/posterior pattern formation	2	0.933128	0.238538
Cluster 46: electron transport chain
observed gene count: 7
expected gene count: 2.2251516773733
uncorrected p-value: 0.00554182485099496
GO ID	term	observed gene count	expected gene count	uncorrected p-value
GO:0006120	mitochondrial electron transport, NADH to ubiquinone	3	0.358895	0.00330893
GO:0006084	acetyl-CoA metabolic process	1	0.143558	0.138407
GO:0022904	respiratory electron transport chain	1	0.215337	0.200255
GO:0022900	electron transport chain	1	0.358895	0.310952
GO:0006099	tricarboxylic acid cycle	1	0.933128	0.620328
Cluster 47: fatty acid metabolic process
observed gene count: 7
expected gene count: 2.36870985010707
uncorrected p-value: 0.00794111743350014
GO ID	term	observed gene count	expected gene count	uncorrected p-value
GO:0006633	fatty acid biosynthetic process	5	1.07669	0.00309831
GO:0006631	fatty acid metabolic process	2	1.22024	0.347557
Cluster 48: DNA damage checkpoint
observed gene count: 3
expected gene count: 0.502453604568166
uncorrected p-value: 0.01038014517002
GO ID	term	observed gene count	expected gene count	uncorrected p-value
GO:0000077	DNA damage checkpoint	3	0.502454	0.0103801
Cluster 49: germline cell cycle switching, mitotic to meiotic cell cycle
observed gene count: 7
expected gene count: 2.51226802284083
uncorrected p-value: 0.0110292543976698
GO ID	term	observed gene count	expected gene count	uncorrected p-value
GO:0051729	germline cell cycle switching, mitotic to meiotic cell cycle	7	2.51227	0.0110293
Cluster 50: metal ion transport
observed gene count: 5
expected gene count: 1.43558172733762
uncorrected p-value: 0.0118431144815874
GO ID	term	observed gene count	expected gene count	uncorrected p-value
GO:0030001	metal ion transport	5	1.14847	0.00424257
GO:0006825	copper ion transport	1	0.215337	0.200255
Cluster 51: collagen and cuticulin-based cuticle development
observed gene count: 13
expected gene count: 7.17790863668808
uncorrected p-value: 0.0266792720450375
GO ID	term	observed gene count	expected gene count	uncorrected p-value
GO:0040002	collagen and cuticulin-based cuticle development	13	7.10613	0.0247832
Cluster 52: nucleoside metabolic process
observed gene count: 3
expected gene count: 0.717790863668808
uncorrected p-value: 0.0302492119386769
GO ID	term	observed gene count	expected gene count	uncorrected p-value
GO:0015936	coenzyme A metabolic process	1	0.0717791	0.0717791
GO:0009116	nucleoside metabolic process	2	0.646012	0.132465
Cluster 53: RNA catabolic process
observed gene count: 3
expected gene count: 0.86134903640257
uncorrected p-value: 0.0498178027247229
GO ID	term	observed gene count	expected gene count	uncorrected p-value
GO:0006401	RNA catabolic process	3	0.358895	0.00330893
GO:0006402	mRNA catabolic process	1	0.287116	0.257663
Cluster 54: positive regulation of transcription, DNA-dependent
observed gene count: 10
expected gene count: 5.5987687366167
uncorrected p-value: 0.0520002869472719
GO ID	term	observed gene count	expected gene count	uncorrected p-value
GO:0045893	positive regulation of transcription, DNA-dependent	2	0.430675	0.0636287
GO:0045944	positive regulation of transcription from RNA polymerase II promoter	8	5.09632	0.135643
Cluster 55: hexose metabolic process
observed gene count: 3
expected gene count: 0.93312812276945
uncorrected p-value: 0.0614037681621417
GO ID	term	observed gene count	expected gene count	uncorrected p-value
GO:0006006	glucose metabolic process	2	0.430675	0.0636287
GO:0019318	hexose metabolic process	1	0.143558	0.138407
Cluster 56: tRNA aminoacylation for protein translation
observed gene count: 5
expected gene count: 2.36870985010707
uncorrected p-value: 0.0843465298610129
GO ID	term	observed gene count	expected gene count	uncorrected p-value
GO:0006418	tRNA aminoacylation for protein translation	5	2.08159	0.0532665
Cluster 57: sulfur metabolic process
observed gene count: 2
expected gene count: 0.502453604568166
uncorrected p-value: 0.084928143712216
GO ID	term	observed gene count	expected gene count	uncorrected p-value
GO:0006563	L-serine metabolic process	1	0.0717791	0.0717791
GO:0006790	sulfur metabolic process	1	0.143558	0.138407
Cluster 58: protein amino acid phosphorylation
observed gene count: 38
expected gene count: 30.3625535331906
uncorrected p-value: 0.0913896325775684
GO ID	term	observed gene count	expected gene count	uncorrected p-value
GO:0006468	protein amino acid phosphorylation	38	30.219	0.0868087
Cluster 59: primary microRNA processing
observed gene count: 1
expected gene count: 0.215337259100642
uncorrected p-value: 0.200254508824945
GO ID	term	observed gene count	expected gene count	uncorrected p-value
GO:0031053	primary microRNA processing	1	0.0717791	0.0717791
Cluster 60: gonad morphogenesis
observed gene count: 6
expected gene count: 4.30674518201285
uncorrected p-value: 0.259909599383922
GO ID	term	observed gene count	expected gene count	uncorrected p-value
GO:0035262	gonad morphogenesis	5	1.86626	0.0351891
GO:0030334	regulation of cell migration	5	3.23006	0.219349
Cluster 61: regulation of translation
observed gene count: 1
expected gene count: 0.502453604568166
uncorrected p-value: 0.406331902011069
GO ID	term	observed gene count	expected gene count	uncorrected p-value
GO:0006417	regulation of translation	1	0.287116	0.257663
Cluster 62: glycerol metabolic process
observed gene count: 1
expected gene count: 0.502453604568166
uncorrected p-value: 0.406331902011069
GO ID	term	observed gene count	expected gene count	uncorrected p-value
GO:0006071	glycerol metabolic process	1	0.502454	0.406332
Cluster 63: negative regulation of translation
observed gene count: 1
expected gene count: 0.717790863668808
uncorrected p-value: 0.525233816468809
GO ID	term	observed gene count	expected gene count	uncorrected p-value
GO:0017148	negative regulation of translation	1	0.717791	0.525234
Cluster 64: proton transport
observed gene count: 38
expected gene count: 38.4735902926481
uncorrected p-value: 0.556018820815966
GO ID	term	observed gene count	expected gene count	uncorrected p-value
GO:0015986	ATP synthesis coupled proton transport	7	1.22024	9.96579e-05
GO:0009165	nucleotide biosynthetic process	2	0.215337	0.0147132
GO:0009150	purine ribonucleotide metabolic process	1	0.0717791	0.0717791
GO:0046034	ATP metabolic process	2	0.502454	0.0849281
GO:0034220	ion transmembrane transport	1	0.502454	0.406332
GO:0015992	proton transport	1	0.574233	0.448952
GO:0055085	transmembrane transport	24	25.4098	0.644247
GO:0006812	cation transport	3	4.09141	0.785984
Cluster 65: response to heat
observed gene count: 2
expected gene count: 2.44048893647395
uncorrected p-value: 0.71173806832262
GO ID	term	observed gene count	expected gene count	uncorrected p-value
GO:0009408	response to heat	2	2.36871	0.696053
Cluster 66: protein amino acid glycosylation
observed gene count: 2
expected gene count: 2.58404710920771
uncorrected p-value: 0.741070485839574
GO ID	term	observed gene count	expected gene count	uncorrected p-value
GO:0006486	protein amino acid glycosylation	2	2.44049	0.711738
Cluster 67: synaptic vesicle transport
observed gene count: 1
expected gene count: 2.00981441827266
uncorrected p-value: 0.875847778095696
GO ID	term	observed gene count	expected gene count	uncorrected p-value
GO:0048489	synaptic vesicle transport	1	1.00491	0.647588

## Sheet: PharyngealMuscle
sample name: PharyngealMuscle
number of associated genes in the sample: 2630
Cluster 1: growth
observed gene count: 433
expected gene count: 221.982512491078
uncorrected p-value: 2.74179687732433e-43
GO ID	term	observed gene count	expected gene count	uncorrected p-value
GO:0009792	embryonic development ending in birth or egg hatching	316	172.529	2.15287e-26
GO:0002119	nematode larval development	219	107.882	8.18545e-24
GO:0040010	positive regulation of growth rate	185	88.5232	1.30938e-21
GO:0040007	growth	178	89.1685	9.3173e-19
Cluster 2: regulation of transcription, DNA-dependent (regulation of transcription)
observed gene count: 97
expected gene count: 35.667380442541
uncorrected p-value: 3.08184782415548e-19
GO ID	term	observed gene count	expected gene count	uncorrected p-value
GO:0006355	regulation of transcription, DNA-dependent	97	35.6674	3.08185e-19
Cluster 3: aging
observed gene count: 100
expected gene count: 47.6933886509636
uncorrected p-value: 2.51546836774792e-12
GO ID	term	observed gene count	expected gene count	uncorrected p-value
GO:0008340	determination of adult life span	99	47.6347	5.4224e-12
GO:0007568	aging	1	0.117327	0.113887
Cluster 4: protein amino acid phosphorylation
observed gene count: 53
expected gene count: 24.8146413276231
uncorrected p-value: 1.83756360028415e-07
GO ID	term	observed gene count	expected gene count	uncorrected p-value
GO:0006468	protein amino acid phosphorylation	53	24.6973	1.57795e-07
Cluster 5: transmembrane transport (nucleotide metabolism / proton transport)
observed gene count: 48
expected gene count: 23.3480549607423
uncorrected p-value: 2.02494053111011e-06
GO ID	term	observed gene count	expected gene count	uncorrected p-value
GO:0055085	transmembrane transport	44	20.7669	2.39936e-06
GO:0015986	ATP synthesis coupled proton transport	4	0.997279	0.015193
Cluster 6: cytoskeleton organization
observed gene count: 10
expected gene count: 1.75990364025696
uncorrected p-value: 4.81218293102132e-06
GO ID	term	observed gene count	expected gene count	uncorrected p-value
GO:0030036	actin cytoskeleton organization	7	1.05594	4.24701e-05
GO:0030029	actin filament-based process	2	0.17599	0.00991717
GO:0007010	cytoskeleton organization	1	0.586635	0.453712
Cluster 7: myofibril assembly (muscle cell development)
observed gene count: 9
expected gene count: 1.52524982155603
uncorrected p-value: 1.01672682495683e-05
GO ID	term	observed gene count	expected gene count	uncorrected p-value
GO:0030036	actin cytoskeleton organization	7	1.05594	4.24701e-05
GO:0051146	striated muscle cell differentiation	1	0.0586635	0.0586635
GO:0030239	myofibril assembly	1	0.117327	0.113887
Cluster 8: sex differentiation
observed gene count: 72
expected gene count: 42.7656584582441
uncorrected p-value: 1.2535302049326e-05
GO ID	term	observed gene count	expected gene count	uncorrected p-value
GO:0040035	hermaphrodite genitalia development	72	42.179	7.85793e-06
GO:0007548	sex differentiation	1	0.645298	0.485766
Cluster 9: axon guidance (neuronal development / cell projection)
observed gene count: 27
expected gene count: 10.9114025695931
uncorrected p-value: 1.29547583321909e-05
GO ID	term	observed gene count	expected gene count	uncorrected p-value
GO:0035058	sensory cilium assembly	5	0.703961	0.000386904
GO:0060271	cilium morphogenesis	3	0.293317	0.00184356
GO:0030182	neuron differentiation	2	0.469308	0.0760702
GO:0048812	neuron projection morphogenesis	2	0.469308	0.0760702
GO:0040024	dauer larval development	6	3.16783	0.0953883
GO:0048666	neuron development	2	0.645298	0.133168
GO:0007411	axon guidance	5	3.28515	0.230571
GO:0042384	cilium assembly	1	0.527971	0.41966
GO:0000902	cell morphogenesis	1	0.527971	0.41966
Cluster 10: response to drug (oxidative phosphorylation)
observed gene count: 9
expected gene count: 1.58391327623126
uncorrected p-value: 1.44562061901147e-05
GO ID	term	observed gene count	expected gene count	uncorrected p-value
GO:0006122	mitochondrial electron transport, ubiquinol to cytochrome c	4	0.234654	1.18178e-05
GO:0006120	mitochondrial electron transport, NADH to ubiquinone	3	0.293317	0.00184356
GO:0042493	response to drug	3	0.645298	0.0233185
GO:0045333	cellular respiration	1	0.117327	0.113887
GO:0042773	ATP synthesis coupled electron transport	1	0.17599	0.165872
GO:0022900	electron transport chain	1	0.293317	0.260874
Cluster 11: protein transport
observed gene count: 23
expected gene count: 8.68219129193433
uncorrected p-value: 1.81796047725315e-05
GO ID	term	observed gene count	expected gene count	uncorrected p-value
GO:0008104	protein localization	7	1.81857	0.00179131
GO:0015031	protein transport	9	3.34382	0.00567099
GO:0006886	intracellular protein transport	8	3.51981	0.0234038
Cluster 12: gonad development
observed gene count: 21
expected gene count: 7.74357601713062
uncorrected p-value: 2.88499473252961e-05
GO ID	term	observed gene count	expected gene count	uncorrected p-value
GO:0008406	gonad development	21	7.74358	2.88499e-05
Cluster 13: molting cycle, collagen and cuticulin-based cuticle
observed gene count: 33
expected gene count: 15.7218058529622
uncorrected p-value: 4.95414334139308e-05
GO ID	term	observed gene count	expected gene count	uncorrected p-value
GO:0018996	molting cycle, collagen and cuticulin-based cuticle	33	15.7218	4.95414e-05
Cluster 14: cellular homeostasis
observed gene count: 11
expected gene count: 2.87450927908637
uncorrected p-value: 0.000101516638142772
GO ID	term	observed gene count	expected gene count	uncorrected p-value
GO:0045454	cell redox homeostasis	10	2.69852	0.000275928
GO:0019725	cellular homeostasis	1	0.117327	0.113887
Cluster 15: regulation of transcription from RNA polymerase II promoter
observed gene count: 18
expected gene count: 6.80496074232691
uncorrected p-value: 0.000144619306720084
GO ID	term	observed gene count	expected gene count	uncorrected p-value
GO:0045944	positive regulation of transcription from RNA polymerase II promoter	15	4.16511	1.29229e-05
GO:0006357	regulation of transcription from RNA polymerase II promoter	5	2.46387	0.0977977
Cluster 16: cell migration
observed gene count: 17
expected gene count: 6.33565310492505
uncorrected p-value: 0.000183141639298904
GO ID	term	observed gene count	expected gene count	uncorrected p-value
GO:0016477	cell migration	17	6.33565	0.000183142
Cluster 17: chitin metabolic process
observed gene count: 6
expected gene count: 0.938615274803712
uncorrected p-value: 0.000194526466885941
GO ID	term	observed gene count	expected gene count	uncorrected p-value
GO:0006030	chitin metabolic process	6	0.821288	8.07765e-05
Cluster 18: regulation of multicellular organism growth
observed gene count: 38
expected gene count: 20.7081995003569
uncorrected p-value: 0.000247759759147135
GO ID	term	observed gene count	expected gene count	uncorrected p-value
GO:0040018	positive regulation of multicellular organism growth	35	19.8282	0.000856183
GO:0040014	regulation of multicellular organism growth	4	1.40792	0.049065
Cluster 19: morphogenesis of an epithelium
observed gene count: 39
expected gene count: 21.8228051391863
uncorrected p-value: 0.000353316485636407
GO ID	term	observed gene count	expected gene count	uncorrected p-value
GO:0002009	morphogenesis of an epithelium	39	21.7055	0.000317287
Cluster 20: proline biosynthetic process
observed gene count: 3
expected gene count: 0.234653818700928
uncorrected p-value: 0.000771217467173185
GO ID	term	observed gene count	expected gene count	uncorrected p-value
GO:0006561	proline biosynthetic process	3	0.234654	0.000771217
GO:0008652	cellular amino acid biosynthetic process	1	0.0586635	0.0586635
Cluster 21: defecation
observed gene count: 9
expected gene count: 2.58119200571021
uncorrected p-value: 0.000885318041576949
GO ID	term	observed gene count	expected gene count	uncorrected p-value
GO:0030421	defecation	9	2.4052	0.00051279
Cluster 22: cell adhesion
observed gene count: 7
expected gene count: 1.6425767309065
uncorrected p-value: 0.000941236065759128
GO ID	term	observed gene count	expected gene count	uncorrected p-value
GO:0007155	cell adhesion	7	1.34926	0.000252343
Cluster 23: protein catabolic process
observed gene count: 24
expected gene count: 12.0846716630978
uncorrected p-value: 0.00108736658560633
GO ID	term	observed gene count	expected gene count	uncorrected p-value
GO:0030163	protein catabolic process	16	7.3916	0.00292959
GO:0006511	ubiquitin-dependent protein catabolic process	8	4.3411	0.0678888
Cluster 24: regulation of Rab GTPase activity
observed gene count: 8
expected gene count: 2.17054782298358
uncorrected p-value: 0.00115810786023415
GO ID	term	observed gene count	expected gene count	uncorrected p-value
GO:0051056	regulation of small GTPase mediated signal transduction	5	0.821288	0.000885905
GO:0032313	regulation of Rab GTPase activity	3	1.23193	0.122161
Cluster 25: pharynx development
observed gene count: 9
expected gene count: 2.87450927908637
uncorrected p-value: 0.00197073522704677
GO ID	term	observed gene count	expected gene count	uncorrected p-value
GO:0043282	pharyngeal muscle development	5	0.527971	7.14394e-05
GO:0060465	pharynx development	6	2.52253	0.0384005
Cluster 26: embryonic morphogenesis
observed gene count: 14
expected gene count: 5.8663454675232
uncorrected p-value: 0.00210212337261259
GO ID	term	observed gene count	expected gene count	uncorrected p-value
GO:0048598	embryonic morphogenesis	7	1.93589	0.0026263
GO:0001703	gastrulation with mouth forming first	7	3.75446	0.0803338
Cluster 27: oviposition
observed gene count: 33
expected gene count: 19.4176034975018
uncorrected p-value: 0.00219533744436633
GO ID	term	observed gene count	expected gene count	uncorrected p-value
GO:0018991	oviposition	32	18.7136	0.00230246
GO:0048609	reproductive process in a multicellular organism	1	0.293317	0.260874
Cluster 28: oogenesis
observed gene count: 36
expected gene count: 22.2921127765882
uncorrected p-value: 0.00336972628605167
GO ID	term	observed gene count	expected gene count	uncorrected p-value
GO:0048477	oogenesis	18	11.0287	0.0283746
GO:0007292	female gamete generation	1	0.0586635	0.0586635
GO:0007276	gamete generation	9	4.98639	0.0611592
GO:0019953	sexual reproduction	1	0.117327	0.113887
GO:0048599	oocyte development	2	1.11461	0.307505
GO:0007281	germ cell development	6	6.45298	0.630823
Cluster 29: apoptosis
observed gene count: 43
expected gene count: 28.0411313347609
uncorrected p-value: 0.00380972547064272
GO ID	term	observed gene count	expected gene count	uncorrected p-value
GO:0006915	apoptosis	39	24.6973	0.00346331
GO:0012501	programmed cell death	3	0.821288	0.0451303
GO:0008219	cell death	3	3.16783	0.620952
Cluster 30: regulation of vulval development
observed gene count: 24
expected gene count: 13.3752676659529
uncorrected p-value: 0.00417037128848003
GO ID	term	observed gene count	expected gene count	uncorrected p-value
GO:0040027	negative regulation of vulval development	19	10.8527	0.0127742
GO:0040026	positive regulation of vulval development	6	2.52253	0.0384005
GO:0040028	regulation of vulval development	2	1.05594	0.285335
Cluster 31: ion transport
observed gene count: 24
expected gene count: 14.2552194860814
uncorrected p-value: 0.00904488035742173
GO ID	term	observed gene count	expected gene count	uncorrected p-value
GO:0030001	metal ion transport	4	0.938615	0.0121739
GO:0006811	ion transport	15	9.26883	0.0452824
GO:0015672	monovalent inorganic cation transport	1	0.234654	0.214808
GO:0006812	cation transport	4	3.34382	0.431621
GO:0006813	potassium ion transport	2	1.99456	0.600778
Cluster 32: regulation of phosphorylation
observed gene count: 4
expected gene count: 0.87995182012848
uncorrected p-value: 0.00956831708608902
GO ID	term	observed gene count	expected gene count	uncorrected p-value
GO:0007205	activation of protein kinase C activity by G-protein coupled receptor protein signaling pathway	3	0.469308	0.00903319
GO:0042325	regulation of phosphorylation	1	0.0586635	0.0586635
Cluster 33: negative regulation of apoptosis
observed gene count: 5
expected gene count: 1.34925945753034
uncorrected p-value: 0.00958007357262715
GO ID	term	observed gene count	expected gene count	uncorrected p-value
GO:0043066	negative regulation of apoptosis	4	0.821288	0.00735407
GO:0043069	negative regulation of programmed cell death	1	0.17599	0.165872
Cluster 34: microtubule-based process
observed gene count: 12
expected gene count: 5.74901855817273
uncorrected p-value: 0.0121856625096652
GO ID	term	observed gene count	expected gene count	uncorrected p-value
GO:0007017	microtubule-based process	6	1.46659	0.00272777
GO:0007052	mitotic spindle organization	7	4.28243	0.135722
Cluster 35: response to heat
observed gene count: 6
expected gene count: 1.99455745895789
uncorrected p-value: 0.0132071862161501
GO ID	term	observed gene count	expected gene count	uncorrected p-value
GO:0009408	response to heat	6	1.93589	0.011431
Cluster 36: collagen and cuticulin-based cuticle development
observed gene count: 12
expected gene count: 5.8663454675232
uncorrected p-value: 0.0141666858131591
GO ID	term	observed gene count	expected gene count	uncorrected p-value
GO:0040002	collagen and cuticulin-based cuticle development	12	5.80768	0.0131477
Cluster 37: eating behavior
observed gene count: 6
expected gene count: 2.11188436830835
uncorrected p-value: 0.0173209008597669
GO ID	term	observed gene count	expected gene count	uncorrected p-value
GO:0043050	pharyngeal pumping	5	1.23193	0.00638621
GO:0042755	eating behavior	1	0.0586635	0.0586635
GO:0007631	feeding behavior	1	0.938615	0.619945
Cluster 38: fertilization
observed gene count: 9
expected gene count: 3.98911491791577
uncorrected p-value: 0.0175226000589628
GO ID	term	observed gene count	expected gene count	uncorrected p-value
GO:0007097	nuclear migration	2	0.351981	0.0440512
GO:0035046	pronuclear migration	6	3.0505	0.0827909
GO:0009566	fertilization	1	0.117327	0.113887
GO:0019953	sexual reproduction	1	0.117327	0.113887
Cluster 39: cellular respiration
observed gene count: 4
expected gene count: 1.05594218415418
uncorrected p-value: 0.0186441124065532
GO ID	term	observed gene count	expected gene count	uncorrected p-value
GO:0006099	tricarboxylic acid cycle	3	0.762625	0.0370354
GO:0045333	cellular respiration	1	0.117327	0.113887
Cluster 40: regulation of cell growth
observed gene count: 5
expected gene count: 1.58391327623126
uncorrected p-value: 0.0189359202086128
GO ID	term	observed gene count	expected gene count	uncorrected p-value
GO:0030516	regulation of axon extension	3	0.586635	0.0177206
GO:0050770	regulation of axonogenesis	1	0.117327	0.113887
GO:0001558	regulation of cell growth	1	0.117327	0.113887
GO:0045664	regulation of neuron differentiation	1	0.527971	0.41966
Cluster 41: cGMP biosynthetic process
observed gene count: 6
expected gene count: 2.40520164168451
uncorrected p-value: 0.0312423472446972
GO ID	term	observed gene count	expected gene count	uncorrected p-value
GO:0009190	cyclic nucleotide biosynthetic process	6	2.22921	0.0222374
GO:0006182	cGMP biosynthetic process	3	0.997279	0.0740673
Cluster 42: cell-cell signaling
observed gene count: 5
expected gene count: 1.87723054960742
uncorrected p-value: 0.0371513158587212
GO ID	term	observed gene count	expected gene count	uncorrected p-value
GO:0007268	synaptic transmission	2	0.586635	0.113196
GO:0007267	cell-cell signaling	1	0.234654	0.214808
GO:0006836	neurotransmitter transport	2	1.05594	0.285335
Cluster 43: germline cell cycle switching, mitotic to meiotic cell cycle
observed gene count: 5
expected gene count: 2.05322091363312
uncorrected p-value: 0.0519138728255845
GO ID	term	observed gene count	expected gene count	uncorrected p-value
GO:0051729	germline cell cycle switching, mitotic to meiotic cell cycle	5	2.05322	0.0519139
Cluster 44: protein amino acid glycosylation
observed gene count: 5
expected gene count: 2.11188436830835
uncorrected p-value: 0.0574933844329743
GO ID	term	observed gene count	expected gene count	uncorrected p-value
GO:0006486	protein amino acid glycosylation	5	1.99456	0.0466644
Cluster 45: maintenance of protein location
observed gene count: 2
expected gene count: 0.469307637401856
uncorrected p-value: 0.0760701835933241
GO ID	term	observed gene count	expected gene count	uncorrected p-value
GO:0045185	maintenance of protein location	1	0.17599	0.165872
GO:0007016	cytoskeletal anchoring at plasma membrane	1	0.293317	0.260874
Cluster 46: fatty acid metabolic process
observed gene count: 4
expected gene count: 1.93589400428266
uncorrected p-value: 0.125681463108383
GO ID	term	observed gene count	expected gene count	uncorrected p-value
GO:0008652	cellular amino acid biosynthetic process	1	0.0586635	0.0586635
GO:0006633	fatty acid biosynthetic process	2	0.879952	0.218707
GO:0006631	fatty acid metabolic process	1	0.997279	0.642248
Cluster 47: tRNA aminoacylation
observed gene count: 4
expected gene count: 1.93589400428266
uncorrected p-value: 0.125681463108383
GO ID	term	observed gene count	expected gene count	uncorrected p-value
GO:0006418	tRNA aminoacylation for protein translation	4	1.70124	0.087331
GO:0043039	tRNA aminoacylation	1	0.469308	0.383487
Cluster 48: phosphate transport
observed gene count: 2
expected gene count: 0.703961456102784
uncorrected p-value: 0.153850157713251
GO ID	term	observed gene count	expected gene count	uncorrected p-value
GO:0006817	phosphate transport	2	0.351981	0.0440512
Cluster 49: peptide metabolic process
observed gene count: 1
expected gene count: 0.175990364025696
uncorrected p-value: 0.165871524363903
GO ID	term	observed gene count	expected gene count	uncorrected p-value
GO:0006518	peptide metabolic process	1	0.17599	0.165872
Cluster 50: negative regulation of multicellular organism growth
observed gene count: 8
expected gene count: 5.63169164882227
uncorrected p-value: 0.201468306348034
GO ID	term	observed gene count	expected gene count	uncorrected p-value
GO:0040015	negative regulation of multicellular organism growth	8	5.63169	0.201468
Cluster 51: embryonic pattern specification
observed gene count: 2
expected gene count: 0.87995182012848
uncorrected p-value: 0.218707221338219
GO ID	term	observed gene count	expected gene count	uncorrected p-value
GO:0009880	embryonic pattern specification	2	0.703961	0.15385
Cluster 52: regulation of actin filament polymerization
observed gene count: 2
expected gene count: 1.05594218415418
uncorrected p-value: 0.285335124808259
GO ID	term	observed gene count	expected gene count	uncorrected p-value
GO:0032956	regulation of actin cytoskeleton organization	1	0.234654	0.214808
GO:0030833	regulation of actin filament polymerization	1	0.410644	0.34506
Cluster 53: meiosis
observed gene count: 14
expected gene count: 11.8500178443969
uncorrected p-value: 0.298737049077443
GO ID	term	observed gene count	expected gene count	uncorrected p-value
GO:0007049	cell cycle	2	0.938615	0.240854
GO:0045132	meiotic chromosome segregation	7	6.80496	0.524722
GO:0007059	chromosome segregation	1	0.821288	0.571082
GO:0007126	meiosis	5	6.98095	0.833839
Cluster 54: GPI anchor metabolic process
observed gene count: 2
expected gene count: 1.23193254817987
uncorrected p-value: 0.351362897525021
GO ID	term	observed gene count	expected gene count	uncorrected p-value
GO:0006505	GPI anchor metabolic process	1	0.117327	0.113887
GO:0046474	glycerophospholipid biosynthetic process	1	0.410644	0.34506
Cluster 55: nucleosome assembly
observed gene count: 8
expected gene count: 6.92228765167737
uncorrected p-value: 0.389279703709502
GO ID	term	observed gene count	expected gene count	uncorrected p-value
GO:0051258	protein polymerization	3	0.997279	0.0740673
GO:0006334	nucleosome assembly	5	5.22105	0.603793
Cluster 56: RNA processing
observed gene count: 3
expected gene count: 2.87450927908637
uncorrected p-value: 0.554397289211403
GO ID	term	observed gene count	expected gene count	uncorrected p-value
GO:0006396	RNA processing	2	1.87723	0.567452
GO:0006397	mRNA processing	1	0.879952	0.596252
Cluster 57: steroid biosynthetic process
observed gene count: 1
expected gene count: 0.87995182012848
uncorrected p-value: 0.596251993603675
GO ID	term	observed gene count	expected gene count	uncorrected p-value
GO:0006694	steroid biosynthetic process	1	0.410644	0.34506
Cluster 58: chemotaxis
observed gene count: 2
expected gene count: 2.11188436830835
uncorrected p-value: 0.632125957583195
GO ID	term	observed gene count	expected gene count	uncorrected p-value
GO:0007626	locomotory behavior	1	0.879952	0.596252
GO:0006935	chemotaxis	1	1.23193	0.719123
Cluster 59: endocytosis
observed gene count: 1
expected gene count: 0.997278729478944
uncorrected p-value: 0.642248462644872
GO ID	term	observed gene count	expected gene count	uncorrected p-value
GO:0006897	endocytosis	1	0.879952	0.596252
Cluster 60: feminization of hermaphroditic germ-line
observed gene count: 2
expected gene count: 2.28787473233405
uncorrected p-value: 0.67548631295752
GO ID	term	observed gene count	expected gene count	uncorrected p-value
GO:0040022	feminization of hermaphroditic germ-line	2	1.87723	0.567452

## Sheet: N2_Ad_gonad-1-RZLI
sample name: N2_Ad_gonad-1-RZLI
number of associated genes in the sample: 2805
Cluster 1: growth
observed gene count: 1036
expected gene count: 236.753211991435
uncorrected p-value: 0
GO ID	term	observed gene count	expected gene count	uncorrected p-value
GO:0009792	embryonic development ending in birth or egg hatching	912	184.009	0
GO:0002119	nematode larval development	503	115.061	3.28585e-190
GO:0040007	growth	447	95.1017	1.4055e-181
GO:0040010	positive regulation of growth rate	407	94.4135	1.11333e-149
GO:0009791	post-embryonic development	3	1.00107	0.0743635
GO:0040009	regulation of growth rate	1	0.125134	0.121221
Cluster 2: hermaphrodite genitalia development (genitalia development)
observed gene count: 226
expected gene count: 45.6112821199143
uncorrected p-value: 4.65311142917387e-95
GO ID	term	observed gene count	expected gene count	uncorrected p-value
GO:0040035	hermaphrodite genitalia development	226	44.9856	2.01484e-96
Cluster 3: apoptosis
observed gene count: 158
expected gene count: 29.9069860813704
uncorrected p-value: 6.98230425761257e-71
GO ID	term	observed gene count	expected gene count	uncorrected p-value
GO:0006915	apoptosis	148	26.3407	1.49187e-70
GO:0008219	cell death	9	3.37861	0.00596281
GO:0012501	programmed cell death	2	0.875937	0.217082
Cluster 4: meiosis
observed gene count: 92
expected gene count: 12.5759502141328
uncorrected p-value: 4.61372862696776e-56
GO ID	term	observed gene count	expected gene count	uncorrected p-value
GO:0045132	meiotic chromosome segregation	64	7.25776	6.1262e-46
GO:0007126	meiosis	57	7.44546	1.32952e-36
GO:0007049	cell cycle	7	1.00107	2.57682e-05
GO:0007059	chromosome segregation	6	0.875937	0.00011565
Cluster 5: oogenesis (reproduction)
observed gene count: 93
expected gene count: 17.4561697002141
uncorrected p-value: 1.81370166007939e-42
GO ID	term	observed gene count	expected gene count	uncorrected p-value
GO:0007276	gamete generation	38	5.31819	1.62481e-23
GO:0048477	oogenesis	56	11.7626	2.15765e-23
GO:0048609	reproductive process in a multicellular organism	1	0.312835	0.276073
GO:0032504	multicellular organism reproduction	1	0.437968	0.363837
Cluster 6: morphogenesis of an epithelium
observed gene count: 107
expected gene count: 23.2748929336188
uncorrected p-value: 7.30777470552752e-42
GO ID	term	observed gene count	expected gene count	uncorrected p-value
GO:0002009	morphogenesis of an epithelium	107	23.1498	4.19252e-42
Cluster 7: gamete generation
observed gene count: 74
expected gene count: 11.8251472162741
uncorrected p-value: 1.4201599687576e-39
GO ID	term	observed gene count	expected gene count	uncorrected p-value
GO:0007276	gamete generation	38	5.31819	1.62481e-23
GO:0007281	germ cell development	40	6.88236	1.15842e-20
Cluster 8: determination of adult life span (aging)
observed gene count: 160
expected gene count: 50.8669031049251
uncorrected p-value: 7.45183765296581e-39
GO ID	term	observed gene count	expected gene count	uncorrected p-value
GO:0008340	determination of adult life span	160	50.8043	6.36449e-39
Cluster 9: gene silencing (posttranscriptional regulation)
observed gene count: 64
expected gene count: 8.94706905781585
uncorrected p-value: 1.1699681488528e-38
GO ID	term	observed gene count	expected gene count	uncorrected p-value
GO:0016246	RNA interference	61	8.5091	5.57744e-37
GO:0016458	gene silencing	3	0.187701	0.00024468
GO:0010608	posttranscriptional regulation of gene expression	2	0.187701	0.0112506
GO:0031047	gene silencing by RNA	1	0.0625669	0.0625669
Cluster 10: DNA repair
observed gene count: 54
expected gene count: 7.94599839400428
uncorrected p-value: 1.93381490426847e-31
GO ID	term	observed gene count	expected gene count	uncorrected p-value
GO:0006974	response to DNA damage stimulus	30	5.19305	8.8633e-16
GO:0006281	DNA repair	20	2.37754	8.88942e-15
GO:0006259	DNA metabolic process	7	0.81337	4.56948e-06
GO:0033554	cellular response to stress	4	0.375401	0.000207066
Cluster 11: regulation of vulval development
observed gene count: 59
expected gene count: 12.4508163811563
uncorrected p-value: 1.88872109804035e-24
GO ID	term	observed gene count	expected gene count	uncorrected p-value
GO:0040027	negative regulation of vulval development	57	11.5749	1.3216e-24
GO:0040028	regulation of vulval development	2	1.1262	0.311958
Cluster 12: tRNA aminoacylation
observed gene count: 23
expected gene count: 2.06470824411135
uncorrected p-value: 9.53315588259622e-21
GO ID	term	observed gene count	expected gene count	uncorrected p-value
GO:0006418	tRNA aminoacylation for protein translation	19	1.81444	1.3904e-16
GO:0043039	tRNA aminoacylation	6	0.500535	1.49726e-06
Cluster 13: gonad development
observed gene count: 42
expected gene count: 8.2588329764454
uncorrected p-value: 4.19324105149792e-19
GO ID	term	observed gene count	expected gene count	uncorrected p-value
GO:0008406	gonad development	42	8.25883	4.19324e-19
Cluster 14: microtubule-based process
observed gene count: 35
expected gene count: 6.75722698072805
uncorrected p-value: 1.90372306526907e-16
GO ID	term	observed gene count	expected gene count	uncorrected p-value
GO:0007052	mitotic spindle organization	30	4.56738	1.31632e-17
GO:0000226	microtubule cytoskeleton organization	5	0.500535	4.55958e-05
GO:0007010	cytoskeleton organization	2	0.625669	0.126108
GO:0007017	microtubule-based process	3	1.56417	0.203614
Cluster 15: molting cycle, collagen and cuticulin-based cuticle
observed gene count: 56
expected gene count: 16.7679336188437
uncorrected p-value: 1.19839556277171e-15
GO ID	term	observed gene count	expected gene count	uncorrected p-value
GO:0018996	molting cycle, collagen and cuticulin-based cuticle	56	16.7679	1.1984e-15
Cluster 16: regulation of multicellular organism growth
observed gene count: 65
expected gene count: 22.0861215203426
uncorrected p-value: 4.31999732594358e-15
GO ID	term	observed gene count	expected gene count	uncorrected p-value
GO:0040018	positive regulation of multicellular organism growth	63	21.1476	6.28979e-15
GO:0040014	regulation of multicellular organism growth	4	1.50161	0.0596423
Cluster 17: germ-line sex determination
observed gene count: 22
expected gene count: 3.06577890792291
uncorrected p-value: 2.9185774690382e-14
GO ID	term	observed gene count	expected gene count	uncorrected p-value
GO:0040022	feminization of hermaphroditic germ-line	14	2.00214	2.19788e-09
GO:0042006	masculinization of hermaphroditic germ-line	6	0.750803	3.96881e-05
GO:0040021	hermaphrodite germ-line sex determination	3	0.187701	0.00024468
GO:0018992	germ-line sex determination	2	0.125134	0.00391331
Cluster 18: phosphate metabolic process
observed gene count: 70
expected gene count: 26.4658056745182
uncorrected p-value: 9.84317828112922e-14
GO ID	term	observed gene count	expected gene count	uncorrected p-value
GO:0006468	protein amino acid phosphorylation	69	26.3407	2.36994e-13
GO:0006796	phosphate metabolic process	1	0.0625669	0.0625669
Cluster 19: mitosis
observed gene count: 26
expected gene count: 4.56738490364026
uncorrected p-value: 1.08336905257362e-13
GO ID	term	observed gene count	expected gene count	uncorrected p-value
GO:0000070	mitotic sister chromatid segregation	13	1.18877	4.16367e-12
GO:0007067	mitosis	12	3.19091	5.64012e-05
GO:0000280	nuclear division	1	0.0625669	0.0625669
GO:0000087	M phase of mitotic cell cycle	1	0.312835	0.276073
Cluster 20: regulation of meiosis
observed gene count: 29
expected gene count: 5.69358940042827
uncorrected p-value: 1.15143171315109e-13
GO ID	term	observed gene count	expected gene count	uncorrected p-value
GO:0042127	regulation of cell proliferation	29	5.56846	6.01349e-14
GO:0040020	regulation of meiosis	28	5.25562	8.48668e-14
GO:0045836	positive regulation of meiosis	1	0.187701	0.176205
Cluster 21: fertilization
observed gene count: 24
expected gene count: 4.1294164882227
uncorrected p-value: 5.61198281204976e-13
GO ID	term	observed gene count	expected gene count	uncorrected p-value
GO:0035046	pronuclear migration	21	3.25348	1.42684e-12
GO:0007338	single fertilization	2	0.375401	0.049578
GO:0051647	nucleus localization	1	0.0625669	0.0625669
GO:0009566	fertilization	1	0.125134	0.121221
Cluster 22: gastrulation
observed gene count: 29
expected gene count: 6.25669164882227
uncorrected p-value: 1.69069599843934e-12
GO ID	term	observed gene count	expected gene count	uncorrected p-value
GO:0001703	gastrulation with mouth forming first	19	4.00428	7.25247e-09
GO:0048598	embryonic morphogenesis	9	2.06471	0.000141349
GO:0007369	gastrulation	1	0.187701	0.176205
Cluster 23: female meiosis
observed gene count: 11
expected gene count: 0.938503747323341
uncorrected p-value: 6.09228954427859e-11
GO ID	term	observed gene count	expected gene count	uncorrected p-value
GO:0040038	polar body extrusion after meiotic divisions	10	0.750803	5.31832e-11
GO:0007143	female meiosis	1	0.187701	0.176205
Cluster 24: exocytosis
observed gene count: 25
expected gene count: 5.5058886509636
uncorrected p-value: 9.26380233043405e-11
GO ID	term	observed gene count	expected gene count	uncorrected p-value
GO:0032940	secretion by cell	18	4.69252	6.26286e-07
GO:0006904	vesicle docking during exocytosis	4	0.500535	0.00087262
GO:0006887	exocytosis	3	0.250268	0.00093284
GO:0048278	vesicle docking	1	0.0625669	0.0625669
Cluster 25: protein targeting
observed gene count: 24
expected gene count: 5.13048715203426
uncorrected p-value: 1.101365426544e-10
GO ID	term	observed gene count	expected gene count	uncorrected p-value
GO:0006886	intracellular protein transport	14	3.75401	1.53618e-05
GO:0007005	mitochondrion organization	5	0.563102	9.72755e-05
GO:0006839	mitochondrial transport	1	0.0625669	0.0625669
GO:0033365	protein localization in organelle	2	0.500535	0.0851743
GO:0006626	protein targeting to mitochondrion	1	0.125134	0.121221
GO:0045039	protein import into mitochondrial inner membrane	1	0.125134	0.121221
GO:0006605	protein targeting	1	0.187701	0.176205
Cluster 26: protein targeting
observed gene count: 34
expected gene count: 9.76043897216274
uncorrected p-value: 1.34045283326606e-10
GO ID	term	observed gene count	expected gene count	uncorrected p-value
GO:0008104	protein localization	10	1.93957	1.18676e-05
GO:0006886	intracellular protein transport	14	3.75401	1.53618e-05
GO:0046907	intracellular transport	3	0.250268	0.00093284
GO:0033365	protein localization in organelle	2	0.500535	0.0851743
GO:0006605	protein targeting	1	0.187701	0.176205
GO:0045184	establishment of protein localization	1	0.187701	0.176205
GO:0015031	protein transport	5	3.56631	0.284285
Cluster 27: asymmetric cell division
observed gene count: 13
expected gene count: 1.50160599571734
uncorrected p-value: 2.84575801974374e-10
GO ID	term	observed gene count	expected gene count	uncorrected p-value
GO:0042078	germ-line stem cell division	6	0.563102	4.25194e-06
GO:0008356	asymmetric cell division	7	0.938504	1.53255e-05
Cluster 28: synapsis
observed gene count: 9
expected gene count: 0.68823608137045
uncorrected p-value: 7.11318579339434e-10
GO ID	term	observed gene count	expected gene count	uncorrected p-value
GO:0007130	synaptonemal complex assembly	6	0.437968	3.95457e-07
GO:0045143	homologous chromosome segregation	3	0.187701	0.00024468
GO:0051026	chiasma formation	3	0.250268	0.00093284
GO:0007129	synapsis	1	0.0625669	0.0625669
Cluster 29: oviposition
observed gene count: 52
expected gene count: 20.7096493576017
uncorrected p-value: 9.38883117877294e-10
GO ID	term	observed gene count	expected gene count	uncorrected p-value
GO:0018991	oviposition	50	19.9588	2.11686e-09
GO:0048609	reproductive process in a multicellular organism	1	0.312835	0.276073
GO:0032504	multicellular organism reproduction	1	0.437968	0.363837
Cluster 30: cell migration
observed gene count: 25
expected gene count: 6.75722698072805
uncorrected p-value: 9.79573725210117e-09
GO ID	term	observed gene count	expected gene count	uncorrected p-value
GO:0016477	cell migration	25	6.75723	9.79574e-09
Cluster 31: negative regulation of multicellular organism growth
observed gene count: 23
expected gene count: 6.00642398286938
uncorrected p-value: 1.88495386090132e-08
GO ID	term	observed gene count	expected gene count	uncorrected p-value
GO:0040015	negative regulation of multicellular organism growth	23	6.00642	1.88495e-08
Cluster 32: cell morphogenesis
observed gene count: 17
expected gene count: 3.50374732334047
uncorrected p-value: 3.07230018740648e-08
GO ID	term	observed gene count	expected gene count	uncorrected p-value
GO:0000132	establishment of mitotic spindle orientation	11	1.75187	4.47515e-07
GO:0040001	establishment of mitotic spindle localization	2	0.437968	0.0665795
GO:0030010	establishment of cell polarity	2	0.500535	0.0851743
GO:0000902	cell morphogenesis	2	0.563102	0.105097
GO:0007163	establishment or maintenance of cell polarity	2	0.750803	0.170562
Cluster 33: rRNA processing
observed gene count: 12
expected gene count: 1.75187366167024
uncorrected p-value: 4.16098698376601e-08
GO ID	term	observed gene count	expected gene count	uncorrected p-value
GO:0006364	rRNA processing	7	1.00107	2.57682e-05
GO:0042254	ribosome biogenesis	5	0.750803	0.00052153
Cluster 34: germline cell cycle switching, mitotic to meiotic cell cycle
observed gene count: 12
expected gene count: 2.18984207708779
uncorrected p-value: 7.56155633677064e-07
GO ID	term	observed gene count	expected gene count	uncorrected p-value
GO:0051729	germline cell cycle switching, mitotic to meiotic cell cycle	12	2.18984	7.56156e-07
Cluster 35: chitin metabolic process
observed gene count: 8
expected gene count: 1.00107066381156
uncorrected p-value: 1.89901404680822e-06
GO ID	term	observed gene count	expected gene count	uncorrected p-value
GO:0006030	chitin metabolic process	6	0.875937	0.00011565
GO:0005976	polysaccharide metabolic process	2	0.125134	0.00391331
Cluster 36: transcription initiation
observed gene count: 13
expected gene count: 2.87807815845824
uncorrected p-value: 3.15696900135852e-06
GO ID	term	observed gene count	expected gene count	uncorrected p-value
GO:0006351	transcription, DNA-dependent	11	2.12728	4.20172e-06
GO:0006352	transcription initiation	2	0.750803	0.170562
Cluster 37: kinetochore assembly
observed gene count: 5
expected gene count: 0.375401498929336
uncorrected p-value: 5.43509702407389e-06
GO ID	term	observed gene count	expected gene count	uncorrected p-value
GO:0051382	kinetochore assembly	4	0.250268	1.52935e-05
GO:0051383	kinetochore organization	1	0.125134	0.121221
Cluster 38: cytokinesis, completion of separation
observed gene count: 4
expected gene count: 0.250267665952891
uncorrected p-value: 1.52935312067434e-05
GO ID	term	observed gene count	expected gene count	uncorrected p-value
GO:0007109	cytokinesis, completion of separation	4	0.250268	1.52935e-05
Cluster 39: gonad morphogenesis
observed gene count: 14
expected gene count: 3.75401498929336
uncorrected p-value: 1.53617539418833e-05
GO ID	term	observed gene count	expected gene count	uncorrected p-value
GO:0035262	gonad morphogenesis	10	1.62674	1.89754e-06
GO:0030334	regulation of cell migration	11	2.81551	7.87023e-05
Cluster 40: centrosome cycle
observed gene count: 5
expected gene count: 0.437968415417559
uncorrected p-value: 1.80341981703714e-05
GO ID	term	observed gene count	expected gene count	uncorrected p-value
GO:0007099	centriole replication	5	0.312835	9.5559e-07
GO:0007098	centrosome cycle	1	0.187701	0.176205
Cluster 41: cuticle development
observed gene count: 18
expected gene count: 6.25669164882227
uncorrected p-value: 4.49437740593022e-05
GO ID	term	observed gene count	expected gene count	uncorrected p-value
GO:0040002	collagen and cuticulin-based cuticle development	17	6.19412	0.000132545
GO:0042335	cuticle development	1	0.0625669	0.0625669
Cluster 42: endocytosis
observed gene count: 18
expected gene count: 6.56952623126338
uncorrected p-value: 8.71624240135947e-05
GO ID	term	observed gene count	expected gene count	uncorrected p-value
GO:0043652	engulfment of apoptotic cell	16	5.13049	4.24389e-05
GO:0006897	endocytosis	2	0.938504	0.240747
Cluster 43: positive regulation of embryonic development
observed gene count: 8
expected gene count: 1.56417291220557
uncorrected p-value: 9.59496406025873e-05
GO ID	term	observed gene count	expected gene count	uncorrected p-value
GO:0040019	positive regulation of embryonic development	8	1.37647	3.35966e-05
Cluster 44: oocyte development
observed gene count: 7
expected gene count: 1.25133832976445
uncorrected p-value: 0.000139796010174913
GO ID	term	observed gene count	expected gene count	uncorrected p-value
GO:0048599	oocyte development	7	1.18877	9.60539e-05
Cluster 45: regulation of translation
observed gene count: 6
expected gene count: 0.938503747323341
uncorrected p-value: 0.000182533187225701
GO ID	term	observed gene count	expected gene count	uncorrected p-value
GO:0017148	negative regulation of translation	4	0.625669	0.00236517
GO:0006417	regulation of translation	2	0.250268	0.0215683
Cluster 46: negative regulation of transposition, DNA-mediated
observed gene count: 3
expected gene count: 0.187700749464668
uncorrected p-value: 0.00024468012507748
GO ID	term	observed gene count	expected gene count	uncorrected p-value
GO:0000335	negative regulation of transposition, DNA-mediated	3	0.187701	0.00024468
Cluster 47: proteolysis
observed gene count: 52
expected gene count: 31.5962928265525
uncorrected p-value: 0.000316553557687273
GO ID	term	observed gene count	expected gene count	uncorrected p-value
GO:0006511	ubiquitin-dependent protein catabolic process	17	4.62995	2.44534e-06
GO:0006508	proteolysis	28	19.208	0.0299678
GO:0030163	protein catabolic process	9	7.88343	0.390566
GO:0051603	proteolysis involved in cellular protein catabolic process	1	0.875937	0.595326
Cluster 48: cell cycle checkpoint
observed gene count: 4
expected gene count: 0.437968415417559
uncorrected p-value: 0.000459107693316402
GO ID	term	observed gene count	expected gene count	uncorrected p-value
GO:0000077	DNA damage checkpoint	4	0.437968	0.000459108
GO:0000075	cell cycle checkpoint	1	0.0625669	0.0625669
Cluster 49: glucose metabolic process
observed gene count: 5
expected gene count: 0.750802997858672
uncorrected p-value: 0.00052152951104219
GO ID	term	observed gene count	expected gene count	uncorrected p-value
GO:0006006	glucose metabolic process	3	0.375401	0.0042392
GO:0005977	glycogen metabolic process	2	0.250268	0.0215683
Cluster 50: RNA catabolic process
observed gene count: 6
expected gene count: 1.18877141327623
uncorrected p-value: 0.000796380468755695
GO ID	term	observed gene count	expected gene count	uncorrected p-value
GO:0000184	nuclear-transcribed mRNA catabolic process, nonsense-mediated decay	3	0.437968	0.00707427
GO:0006402	mRNA catabolic process	2	0.250268	0.0215683
GO:0006401	RNA catabolic process	1	0.312835	0.276073
Cluster 51: response to UV
observed gene count: 5
expected gene count: 0.938503747323341
uncorrected p-value: 0.00168804771198609
GO ID	term	observed gene count	expected gene count	uncorrected p-value
GO:0010165	response to X-ray	3	0.500535	0.0107953
GO:0009411	response to UV	3	0.500535	0.0107953
GO:0010212	response to ionizing radiation	1	0.187701	0.176205
Cluster 52: nucleosome assembly
observed gene count: 14
expected gene count: 5.81872323340471
uncorrected p-value: 0.00189721767808529
GO ID	term	observed gene count	expected gene count	uncorrected p-value
GO:0006334	nucleosome assembly	13	5.56846	0.00354632
GO:0006333	chromatin assembly or disassembly	1	0.125134	0.121221
Cluster 53: embryonic axis specification
observed gene count: 8
expected gene count: 2.56524357601713
uncorrected p-value: 0.00346523957786589
GO ID	term	observed gene count	expected gene count	uncorrected p-value
GO:0008595	determination of anterior/posterior axis, embryo	3	0.312835	0.00222313
GO:0009949	polarity specification of anterior/posterior axis	3	0.437968	0.00707427
GO:0000578	embryonic axis specification	1	0.125134	0.121221
GO:0009880	embryonic pattern specification	1	0.750803	0.539488
Cluster 54: cell fate determination
observed gene count: 8
expected gene count: 2.69037740899358
uncorrected p-value: 0.00470728800960078
GO ID	term	observed gene count	expected gene count	uncorrected p-value
GO:0045167	asymmetric protein localization involved in cell fate determination	5	1.1262	0.00411482
GO:0008105	asymmetric protein localization	2	0.875937	0.217082
GO:0001709	cell fate determination	1	0.312835	0.276073
Cluster 55: protein ubiquitination
observed gene count: 4
expected gene count: 1.00107066381156
uncorrected p-value: 0.0151613379939591
GO ID	term	observed gene count	expected gene count	uncorrected p-value
GO:0016567	protein ubiquitination	4	1.00107	0.0151613
Cluster 56: glutamine biosynthetic process
observed gene count: 3
expected gene count: 0.563102248394004
uncorrected p-value: 0.0154464324058357
GO ID	term	observed gene count	expected gene count	uncorrected p-value
GO:0006542	glutamine biosynthetic process	3	0.312835	0.00222313
Cluster 57: protein import into nucleus
observed gene count: 3
expected gene count: 0.68823608137045
uncorrected p-value: 0.0276224240696055
GO ID	term	observed gene count	expected gene count	uncorrected p-value
GO:0006606	protein import into nucleus	2	0.187701	0.0112506
GO:0006913	nucleocytoplasmic transport	1	0.312835	0.276073
Cluster 58: glucose metabolic process
observed gene count: 3
expected gene count: 0.68823608137045
uncorrected p-value: 0.0276224240696055
GO ID	term	observed gene count	expected gene count	uncorrected p-value
GO:0006006	glucose metabolic process	3	0.375401	0.0042392
Cluster 59: RNA splicing
observed gene count: 4
expected gene count: 1.25133832976445
uncorrected p-value: 0.0330942893137519
GO ID	term	observed gene count	expected gene count	uncorrected p-value
GO:0006397	mRNA processing	3	0.938504	0.0632631
GO:0008380	RNA splicing	1	0.125134	0.121221
Cluster 60: kinetochore organization
observed gene count: 2
expected gene count: 0.312834582441114
uncorrected p-value: 0.0344650855179456
GO ID	term	observed gene count	expected gene count	uncorrected p-value
GO:0051383	kinetochore organization	1	0.125134	0.121221
GO:0045185	maintenance of protein location	1	0.187701	0.176205
Cluster 61: methionine metabolic process
observed gene count: 2
expected gene count: 0.375401498929336
uncorrected p-value: 0.0495780293033084
GO ID	term	observed gene count	expected gene count	uncorrected p-value
GO:0006555	methionine metabolic process	1	0.0625669	0.0625669
GO:0009086	methionine biosynthetic process	1	0.0625669	0.0625669
Cluster 62: defecation
observed gene count: 6
expected gene count: 2.7529443254818
uncorrected p-value: 0.0549037399512207
GO ID	term	observed gene count	expected gene count	uncorrected p-value
GO:0030421	defecation	6	2.56524	0.0408963
Cluster 63: meiotic chromosome movement towards spindle pole
observed gene count: 1
expected gene count: 0.0625669164882227
uncorrected p-value: 0.0625669164882228
GO ID	term	observed gene count	expected gene count	uncorrected p-value
GO:0016344	meiotic chromosome movement towards spindle pole	1	0.0625669	0.0625669
Cluster 64: dsRNA fragmentation
observed gene count: 1
expected gene count: 0.0625669164882227
uncorrected p-value: 0.0625669164882228
GO ID	term	observed gene count	expected gene count	uncorrected p-value
GO:0031050	dsRNA fragmentation	1	0.0625669	0.0625669
Cluster 65: regulation of GTPase activity
observed gene count: 5
expected gene count: 2.31497591006424
uncorrected p-value: 0.0789259118746848
GO ID	term	observed gene count	expected gene count	uncorrected p-value
GO:0032313	regulation of Rab GTPase activity	4	1.31391	0.0389149
GO:0043087	regulation of GTPase activity	1	0.125134	0.121221
Cluster 66: neurotransmitter secretion
observed gene count: 6
expected gene count: 3.12834582441113
uncorrected p-value: 0.0906149803449107
GO ID	term	observed gene count	expected gene count	uncorrected p-value
GO:0006836	neurotransmitter transport	3	1.1262	0.0988925
GO:0007269	neurotransmitter secretion	1	0.187701	0.176205
GO:0048489	synaptic vesicle transport	2	0.875937	0.217082
Cluster 67: tricarboxylic acid cycle
observed gene count: 3
expected gene count: 1.12620449678801
uncorrected p-value: 0.098892542814719
GO ID	term	observed gene count	expected gene count	uncorrected p-value
GO:0006084	acetyl-CoA metabolic process	1	0.125134	0.121221
GO:0006099	tricarboxylic acid cycle	2	0.81337	0.193642
Cluster 68: methylation
observed gene count: 2
expected gene count: 0.563102248394004
uncorrected p-value: 0.105096541813774
GO ID	term	observed gene count	expected gene count	uncorrected p-value
GO:0032259	methylation	2	0.375401	0.049578
Cluster 69: GPI anchor biosynthetic process
observed gene count: 4
expected gene count: 2.12727516059957
uncorrected p-value: 0.160921727486395
GO ID	term	observed gene count	expected gene count	uncorrected p-value
GO:0006506	GPI anchor biosynthetic process	2	0.688236	0.147993
GO:0008654	phospholipid biosynthetic process	2	0.750803	0.170562
Cluster 70: vitelline membrane formation
observed gene count: 3
expected gene count: 1.50160599571734
uncorrected p-value: 0.187294867231234
GO ID	term	observed gene count	expected gene count	uncorrected p-value
GO:0030704	vitelline membrane formation	3	1.25134	0.126182
Cluster 71: electron transport chain
observed gene count: 2
expected gene count: 0.813369914346895
uncorrected p-value: 0.193642222291384
GO ID	term	observed gene count	expected gene count	uncorrected p-value
GO:0022904	respiratory electron transport chain	1	0.187701	0.176205
GO:0022900	electron transport chain	1	0.312835	0.276073
Cluster 72: regulation of mitotic cell cycle
observed gene count: 1
expected gene count: 0.375401498929336
uncorrected p-value: 0.321371711197302
GO ID	term	observed gene count	expected gene count	uncorrected p-value
GO:0007346	regulation of mitotic cell cycle	1	0.187701	0.176205
Cluster 73: cell redox homeostasis
observed gene count: 3
expected gene count: 3.00321199143469
uncorrected p-value: 0.58491213045412
GO ID	term	observed gene count	expected gene count	uncorrected p-value
GO:0045454	cell redox homeostasis	3	2.87808	0.555668
Cluster 74: fatty acid biosynthetic process
observed gene count: 2
expected gene count: 2.06470824411135
uncorrected p-value: 0.620330276294849
GO ID	term	observed gene count	expected gene count	uncorrected p-value
GO:0006633	fatty acid biosynthetic process	2	0.938504	0.240747
Cluster 75: proton transport
observed gene count: 32
expected gene count: 33.5984341541756
uncorrected p-value: 0.63830908922664
GO ID	term	observed gene count	expected gene count	uncorrected p-value
GO:0006164	purine nucleotide biosynthetic process	2	0.312835	0.0344651
GO:0009152	purine ribonucleotide biosynthetic process	1	0.0625669	0.0625669
GO:0030001	metal ion transport	3	1.00107	0.0743635
GO:0015986	ATP synthesis coupled proton transport	3	1.06364	0.0862565
GO:0006754	ATP biosynthetic process	1	0.187701	0.176205
GO:0015672	monovalent inorganic cation transport	1	0.250268	0.227751
GO:0006812	cation transport	5	3.56631	0.284285
GO:0046034	ATP metabolic process	1	0.437968	0.363837
GO:0015992	proton transport	1	0.500535	0.403646
GO:0055085	transmembrane transport	23	22.1487	0.456635
Cluster 76: regulation of transcription, DNA-dependent
observed gene count: 36
expected gene count: 39.8551258029979
uncorrected p-value: 0.759994894183497
GO ID	term	observed gene count	expected gene count	uncorrected p-value
GO:0006357	regulation of transcription from RNA polymerase II promoter	8	2.62781	0.00404972
GO:0006355	regulation of transcription, DNA-dependent	29	38.0407	0.95082

## Sheet: DMM239_Z1Z4_Em
sample name: DMM239_Z1Z4_Em
number of associated genes in the sample: 1847
Cluster 1: growth
observed gene count: 333
expected gene count: 155.894182726624
uncorrected p-value: 3.28665485666788e-41
GO ID	term	observed gene count	expected gene count	uncorrected p-value
GO:0009792	embryonic development ending in birth or egg hatching	261	121.164	1.77224e-32
GO:0002119	nematode larval development	187	75.7636	2.89184e-30
GO:0040007	growth	142	62.6213	9.8871e-20
GO:0040010	positive regulation of growth rate	141	62.1682	1.31903e-19
GO:0009791	post-embryonic development	4	0.659172	0.00351026
Cluster 2: sex differentiation
observed gene count: 79
expected gene count: 30.0335251605996
uncorrected p-value: 7.65622158504507e-15
GO ID	term	observed gene count	expected gene count	uncorrected p-value
GO:0040035	hermaphrodite genitalia development	78	29.6215	1.07115e-14
GO:0007548	sex differentiation	1	0.453181	0.370502
Cluster 3: regulation of transcription, DNA-dependent
observed gene count: 62
expected gene count: 25.0485367594575
uncorrected p-value: 7.63204180656688e-11
GO ID	term	observed gene count	expected gene count	uncorrected p-value
GO:0006355	regulation of transcription, DNA-dependent	62	25.0485	7.63204e-11
Cluster 4: morphogenesis of an epithelium
observed gene count: 45
expected gene count: 15.3257494646681
uncorrected p-value: 1.36644437357142e-10
GO ID	term	observed gene count	expected gene count	uncorrected p-value
GO:0002009	morphogenesis of an epithelium	45	15.2434	1.14357e-10
Cluster 5: gonad development
observed gene count: 23
expected gene count: 5.43816916488223
uncorrected p-value: 4.8285872761221e-09
GO ID	term	observed gene count	expected gene count	uncorrected p-value
GO:0008406	gonad development	23	5.43817	4.82859e-09
Cluster 6: cell migration
observed gene count: 22
expected gene count: 5.14978140613847
uncorrected p-value: 8.54661341513822e-09
GO ID	term	observed gene count	expected gene count	uncorrected p-value
GO:0016477	cell migration	17	4.44941	2.0721e-06
GO:0001764	neuron migration	8	1.07115	6.56495e-06
Cluster 7: regulation of multicellular organism growth
observed gene count: 40
expected gene count: 14.542982690935
uncorrected p-value: 9.31601337911815e-09
GO ID	term	observed gene count	expected gene count	uncorrected p-value
GO:0040018	positive regulation of multicellular organism growth	38	13.925	2.67144e-08
GO:0040014	regulation of multicellular organism growth	3	0.988758	0.0742603
Cluster 8: determination of adult life span
observed gene count: 69
expected gene count: 33.4941782655246
uncorrected p-value: 1.61740818404888e-08
GO ID	term	observed gene count	expected gene count	uncorrected p-value
GO:0008340	determination of adult life span	69	33.453	1.5408e-08
Cluster 9: oviposition
observed gene count: 37
expected gene count: 13.6366211634547
uncorrected p-value: 4.70088733336535e-08
GO ID	term	observed gene count	expected gene count	uncorrected p-value
GO:0018991	oviposition	36	13.1422	5.57484e-08
GO:0032504	multicellular organism reproduction	1	0.288388	0.255109
Cluster 10: regulation of vulval development
observed gene count: 29
expected gene count: 9.39320128479657
uncorrected p-value: 8.28996173333784e-08
GO ID	term	observed gene count	expected gene count	uncorrected p-value
GO:0040027	negative regulation of vulval development	21	7.62168	2.80652e-05
GO:0040028	regulation of vulval development	6	0.741569	5.86928e-05
GO:0040026	positive regulation of vulval development	4	1.77152	0.0999547
Cluster 11: axon guidance
observed gene count: 15
expected gene count: 3.91383386866524
uncorrected p-value: 7.8184761409633e-06
GO ID	term	observed gene count	expected gene count	uncorrected p-value
GO:0007411	axon guidance	8	2.3071	0.00199524
GO:0048812	neuron projection morphogenesis	3	0.329586	0.00334499
GO:0030182	neuron differentiation	2	0.329586	0.0402574
GO:0048666	neuron development	2	0.453181	0.072899
GO:0031175	neuron projection development	1	0.205991	0.189711
GO:0000902	cell morphogenesis	1	0.370784	0.315231
Cluster 12: rRNA processing
observed gene count: 8
expected gene count: 1.15355103497502
uncorrected p-value: 1.21336906950371e-05
GO ID	term	observed gene count	expected gene count	uncorrected p-value
GO:0006364	rRNA processing	5	0.659172	0.000352232
GO:0042254	ribosome biogenesis	3	0.494379	0.0116135
Cluster 13: apoptosis
observed gene count: 40
expected gene count: 19.6927640970735
uncorrected p-value: 2.17564196782798e-05
GO ID	term	observed gene count	expected gene count	uncorrected p-value
GO:0006915	apoptosis	36	17.3445	3.49384e-05
GO:0008219	cell death	4	2.22471	0.182125
GO:0012501	programmed cell death	1	0.576776	0.445163
Cluster 14: positive regulation of gene expression
observed gene count: 16
expected gene count: 4.7789971448965
uncorrected p-value: 2.29035895814951e-05
GO ID	term	observed gene count	expected gene count	uncorrected p-value
GO:0045944	positive regulation of transcription from RNA polymerase II promoter	10	2.92508	0.000642053
GO:0006357	regulation of transcription from RNA polymerase II promoter	5	1.73033	0.0283862
GO:0010628	positive regulation of gene expression	1	0.0823965	0.0807001
GO:0045893	positive regulation of transcription, DNA-dependent	1	0.24719	0.223097
Cluster 15: molting cycle, collagen and cuticulin-based cuticle
observed gene count: 26
expected gene count: 11.0411313347609
uncorrected p-value: 5.31084973712501e-05
GO ID	term	observed gene count	expected gene count	uncorrected p-value
GO:0018996	molting cycle, collagen and cuticulin-based cuticle	26	11.0411	5.31085e-05
Cluster 16: regulation of locomotion
observed gene count: 11
expected gene count: 3.04867059243398
uncorrected p-value: 0.00021608929749724
GO ID	term	observed gene count	expected gene count	uncorrected p-value
GO:0030334	regulation of cell migration	8	1.85392	0.000451493
GO:0051270	regulation of cell motion	1	0.0411983	0.0411983
GO:0040012	regulation of locomotion	2	1.15355	0.321678
Cluster 17: collagen and cuticulin-based cuticle development
observed gene count: 13
expected gene count: 4.11982512491078
uncorrected p-value: 0.000238588919890707
GO ID	term	observed gene count	expected gene count	uncorrected p-value
GO:0040002	collagen and cuticulin-based cuticle development	13	4.07863	0.000215603
Cluster 18: negative regulation of multicellular organism growth
observed gene count: 12
expected gene count: 3.95503211991435
uncorrected p-value: 0.000587018211122971
GO ID	term	observed gene count	expected gene count	uncorrected p-value
GO:0040015	negative regulation of multicellular organism growth	12	3.95503	0.000587018
Cluster 19: oogenesis
observed gene count: 23
expected gene count: 11.0411313347609
uncorrected p-value: 0.000798014005416962
GO ID	term	observed gene count	expected gene count	uncorrected p-value
GO:0007276	gamete generation	10	3.50185	0.00259186
GO:0048477	oogenesis	13	7.74527	0.0482141
Cluster 20: protein amino acid phosphorylation
observed gene count: 32
expected gene count: 17.4268602783726
uncorrected p-value: 0.000799256655014998
GO ID	term	observed gene count	expected gene count	uncorrected p-value
GO:0006468	protein amino acid phosphorylation	32	17.3445	0.000738696
Cluster 21: protein transport
observed gene count: 19
expected gene count: 8.44564150606709
uncorrected p-value: 0.00088808681190819
GO ID	term	observed gene count	expected gene count	uncorrected p-value
GO:0007264	small GTPase mediated signal transduction	12	3.74904	0.000357944
GO:0006886	intracellular protein transport	5	2.4719	0.100699
GO:0015031	protein transport	4	2.3483	0.207558
GO:0008104	protein localization	2	1.27715	0.367143
Cluster 22: dosage compensation, by hypoactivation of X chromosome
observed gene count: 4
expected gene count: 0.494379014989293
uncorrected p-value: 0.00108933155548302
GO ID	term	observed gene count	expected gene count	uncorrected p-value
GO:0042464	dosage compensation, by hypoactivation of X chromosome	4	0.411983	0.000493797
Cluster 23: negative regulation of transcription, DNA-dependent
observed gene count: 7
expected gene count: 2.22470556745182
uncorrected p-value: 0.00648740075914881
GO ID	term	observed gene count	expected gene count	uncorrected p-value
GO:0000122	negative regulation of transcription from RNA polymerase II promoter	6	1.64793	0.00559705
GO:0045892	negative regulation of transcription, DNA-dependent	1	0.411983	0.343448
Cluster 24: transcription, DNA-dependent
observed gene count: 6
expected gene count: 1.89511955745896
uncorrected p-value: 0.0110900172412976
GO ID	term	observed gene count	expected gene count	uncorrected p-value
GO:0006351	transcription, DNA-dependent	5	1.40074	0.0121447
GO:0006366	transcription from RNA polymerase II promoter	2	0.535577	0.0979771
Cluster 25: nucleosome assembly
observed gene count: 9
expected gene count: 3.83143736616702
uncorrected p-value: 0.0145346444029368
GO ID	term	observed gene count	expected gene count	uncorrected p-value
GO:0006334	nucleosome assembly	9	3.66664	0.0110984
Cluster 26: regulation of Rab GTPase activity
observed gene count: 5
expected gene count: 1.52433529621699
uncorrected p-value: 0.0171972743292232
GO ID	term	observed gene count	expected gene count	uncorrected p-value
GO:0032313	regulation of Rab GTPase activity	3	0.865163	0.0533903
GO:0051056	regulation of small GTPase mediated signal transduction	2	0.576776	0.111295
Cluster 27: regulation of axon extension
observed gene count: 4
expected gene count: 1.11235278372591
uncorrected p-value: 0.0236527567454997
GO ID	term	observed gene count	expected gene count	uncorrected p-value
GO:0045664	regulation of neuron differentiation	2	0.370784	0.0503698
GO:0030516	regulation of axon extension	2	0.411983	0.0612778
GO:0031344	regulation of cell projection organization	1	0.205991	0.189711
Cluster 28: pattern specification process
observed gene count: 3
expected gene count: 0.659172019985724
uncorrected p-value: 0.026155022354016
GO ID	term	observed gene count	expected gene count	uncorrected p-value
GO:0007389	pattern specification process	2	0.123595	0.00494961
GO:0009952	anterior/posterior pattern formation	1	0.535577	0.421315
Cluster 29: glycerol metabolic process
observed gene count: 2
expected gene count: 0.288387758743754
uncorrected p-value: 0.0310293325194278
GO ID	term	observed gene count	expected gene count	uncorrected p-value
GO:0006071	glycerol metabolic process	2	0.288388	0.0310293
Cluster 30: fatty acid metabolic process
observed gene count: 4
expected gene count: 1.31834403997145
uncorrected p-value: 0.0412686165677704
GO ID	term	observed gene count	expected gene count	uncorrected p-value
GO:0006633	fatty acid biosynthetic process	2	0.617974	0.125046
GO:0006631	fatty acid metabolic process	2	0.70037	0.153622
Cluster 31: ATP metabolic process
observed gene count: 3
expected gene count: 0.865163276231263
uncorrected p-value: 0.0533903161170475
GO ID	term	observed gene count	expected gene count	uncorrected p-value
GO:0009150	purine ribonucleotide metabolic process	1	0.0411983	0.0411983
GO:0006754	ATP biosynthetic process	1	0.123595	0.118575
GO:0046034	ATP metabolic process	1	0.288388	0.255109
Cluster 32: germline cell cycle switching, mitotic to meiotic cell cycle
observed gene count: 4
expected gene count: 1.44193879371877
uncorrected p-value: 0.0546028139488887
GO ID	term	observed gene count	expected gene count	uncorrected p-value
GO:0051729	germline cell cycle switching, mitotic to meiotic cell cycle	4	1.44194	0.0546028
Cluster 33: RNA processing
observed gene count: 5
expected gene count: 2.1011108137045
uncorrected p-value: 0.0581538760524971
GO ID	term	observed gene count	expected gene count	uncorrected p-value
GO:0016071	mRNA metabolic process	1	0.123595	0.118575
GO:0006396	RNA processing	3	1.31834	0.143657
GO:0006397	mRNA processing	1	0.617974	0.468028
Cluster 34: cell fate determination
observed gene count: 4
expected gene count: 1.48313704496788
uncorrected p-value: 0.0595054227914006
GO ID	term	observed gene count	expected gene count	uncorrected p-value
GO:0001709	cell fate determination	2	0.205991	0.0156104
GO:0045167	asymmetric protein localization involved in cell fate determination	3	0.741569	0.035864
Cluster 35: mitosis
observed gene count: 5
expected gene count: 2.30710206995004
uncorrected p-value: 0.0802446050027582
GO ID	term	observed gene count	expected gene count	uncorrected p-value
GO:0007067	mitosis	4	2.10111	0.157822
GO:0000087	M phase of mitotic cell cycle	1	0.205991	0.189711
Cluster 36: gastrulation
observed gene count: 7
expected gene count: 4.11982512491078
uncorrected p-value: 0.118893830332187
GO ID	term	observed gene count	expected gene count	uncorrected p-value
GO:0007369	gastrulation	1	0.123595	0.118575
GO:0001703	gastrulation with mouth forming first	4	2.63669	0.270212
GO:0048598	embryonic morphogenesis	2	1.35954	0.396788
Cluster 37: nuclear migration
observed gene count: 5
expected gene count: 2.71908458244111
uncorrected p-value: 0.135696924756685
GO ID	term	observed gene count	expected gene count	uncorrected p-value
GO:0007097	nuclear migration	2	0.24719	0.02278
GO:0035046	pronuclear migration	3	2.14231	0.362573
Cluster 38: cell redox homeostasis
observed gene count: 4
expected gene count: 2.01871431120628
uncorrected p-value: 0.142341008096973
GO ID	term	observed gene count	expected gene count	uncorrected p-value
GO:0045454	cell redox homeostasis	4	1.89512	0.12034
Cluster 39: endocytosis
observed gene count: 2
expected gene count: 0.700370271234832
uncorrected p-value: 0.153622461779602
GO ID	term	observed gene count	expected gene count	uncorrected p-value
GO:0006897	endocytosis	2	0.617974	0.125046
Cluster 40: translation
observed gene count: 10
expected gene count: 6.96250446109921
uncorrected p-value: 0.160986777681124
GO ID	term	observed gene count	expected gene count	uncorrected p-value
GO:0006418	tRNA aminoacylation for protein translation	3	1.19475	0.115577
GO:0006412	translation	8	5.68536	0.210052
GO:0043039	tRNA aminoacylation	1	0.329586	0.285802
Cluster 41: ion transport
observed gene count: 13
expected gene count: 10.0111750535332
uncorrected p-value: 0.204956027503389
GO ID	term	observed gene count	expected gene count	uncorrected p-value
GO:0006812	cation transport	8	2.3483	0.00223849
GO:0015672	monovalent inorganic cation transport	2	0.164793	0.00962857
GO:0030001	metal ion transport	2	0.659172	0.139174
GO:0006813	potassium ion transport	1	1.40074	0.760918
GO:0006811	ion transport	2	6.50932	0.98998
Cluster 42: carbohydrate catabolic process
observed gene count: 1
expected gene count: 0.247189507494647
uncorrected p-value: 0.223097246539241
GO ID	term	observed gene count	expected gene count	uncorrected p-value
GO:0016052	carbohydrate catabolic process	1	0.164793	0.154891
Cluster 43: establishment of mitotic spindle localization
observed gene count: 3
expected gene count: 1.68912830121342
uncorrected p-value: 0.238079222450503
GO ID	term	observed gene count	expected gene count	uncorrected p-value
GO:0040001	establishment of mitotic spindle localization	3	0.288388	0.00215658
Cluster 44: mitotic spindle organization
observed gene count: 7
expected gene count: 5.10858315488936
uncorrected p-value: 0.250813607780802
GO ID	term	observed gene count	expected gene count	uncorrected p-value
GO:0007052	mitotic spindle organization	7	3.00747	0.0306144
Cluster 45: meiosis
observed gene count: 9
expected gene count: 7.70407298358315
uncorrected p-value: 0.365227325946169
GO ID	term	observed gene count	expected gene count	uncorrected p-value
GO:0007126	meiosis	7	4.90259	0.220136
GO:0007059	chromosome segregation	1	0.576776	0.445163
GO:0045132	meiotic chromosome segregation	4	4.779	0.708641
Cluster 46: regulation of pH
observed gene count: 3
expected gene count: 2.18350731620271
uncorrected p-value: 0.373894561776378
GO ID	term	observed gene count	expected gene count	uncorrected p-value
GO:0006885	regulation of pH	3	0.411983	0.00673743
GO:0006814	sodium ion transport	3	2.10111	0.35122
Cluster 47: chromosome organization
observed gene count: 1
expected gene count: 0.659172019985724
uncorrected p-value: 0.489951918124928
GO ID	term	observed gene count	expected gene count	uncorrected p-value
GO:0051276	chromosome organization	1	0.329586	0.285802
Cluster 48: proteolysis
observed gene count: 21
expected gene count: 20.8051168807994
uncorrected p-value: 0.513923489582147
GO ID	term	observed gene count	expected gene count	uncorrected p-value
GO:0044257	cellular protein catabolic process	1	0.0411983	0.0411983
GO:0030163	protein catabolic process	6	5.19098	0.418233
GO:0006508	proteolysis	12	12.6479	0.614479
GO:0006511	ubiquitin-dependent protein catabolic process	2	3.04867	0.814429

## Sheet: DMM260_N2ref_EE
sample name: DMM260_N2ref_EE
number of associated genes in the sample: 2361
Cluster 1: axonogenesis
observed gene count: 39
expected gene count: 6.8988891862955
uncorrected p-value: 2.89525716193027e-19
GO ID	term	observed gene count	expected gene count	uncorrected p-value
GO:0035058	sensory cilium assembly	8	0.631959	2.39248e-08
GO:0060271	cilium morphogenesis	5	0.263316	4.03455e-07
GO:0042384	cilium assembly	5	0.473969	4.25128e-05
GO:0033563	dorsal/ventral axon guidance	5	0.947939	0.0019404
GO:0008045	motor axon guidance	4	0.631959	0.00269943
GO:0030182	neuron differentiation	3	0.421306	0.00668772
GO:0048812	neuron projection morphogenesis	3	0.421306	0.00668772
GO:0007411	axon guidance	8	2.94914	0.00870174
GO:0048666	neuron development	3	0.579296	0.0174996
GO:0007409	axonogenesis	2	0.368643	0.0487793
GO:0000902	cell morphogenesis	2	0.473969	0.0780008
GO:0031175	neuron projection development	1	0.263316	0.237014
Cluster 2: protein transport
observed gene count: 49
expected gene count: 12.2178800856531
uncorrected p-value: 5.93960018556351e-17
GO ID	term	observed gene count	expected gene count	uncorrected p-value
GO:0007264	small GTPase mediated signal transduction	23	4.79236	2.31043e-10
GO:0006886	intracellular protein transport	14	3.1598	2.13118e-06
GO:0016192	vesicle-mediated transport	12	2.73849	1.27385e-05
GO:0015031	protein transport	11	3.00181	0.000164972
GO:0008104	protein localization	7	1.63256	0.000957314
GO:0045184	establishment of protein localization	1	0.15799	0.149819
GO:0046907	intracellular transport	1	0.210653	0.194595
Cluster 3: growth
observed gene count: 186
expected gene count: 99.1122858672377
uncorrected p-value: 9.25923071593301e-17
GO ID	term	observed gene count	expected gene count	uncorrected p-value
GO:0002119	nematode larval development	183	96.8478	8.53342e-17
GO:0040007	growth	118	80.0482	1.82013e-05
GO:0009791	post-embryonic development	3	0.842612	0.0488492
Cluster 4: oviposition
observed gene count: 59
expected gene count: 17.4315444325482
uncorrected p-value: 1.87694184060719e-16
GO ID	term	observed gene count	expected gene count	uncorrected p-value
GO:0018991	oviposition	59	16.7996	3.17424e-17
Cluster 5: molting cycle, collagen and cuticulin-based cuticle
observed gene count: 51
expected gene count: 14.1137580299786
uncorrected p-value: 1.30447541197108e-15
GO ID	term	observed gene count	expected gene count	uncorrected p-value
GO:0018996	molting cycle, collagen and cuticulin-based cuticle	51	14.1138	1.30448e-15
Cluster 6: tail tip morphogenesis
observed gene count: 35
expected gene count: 8.0574812633833
uncorrected p-value: 1.30435916529651e-13
GO ID	term	observed gene count	expected gene count	uncorrected p-value
GO:0045138	tail tip morphogenesis	21	3.47578	1.16827e-11
GO:0006357	regulation of transcription from RNA polymerase II promoter	9	2.21186	0.000281264
GO:0000122	negative regulation of transcription from RNA polymerase II promoter	8	2.10653	0.000990411
GO:0010629	negative regulation of gene expression	1	0.15799	0.149819
GO:0045892	negative regulation of transcription, DNA-dependent	1	0.526633	0.417871
Cluster 7: regulation of transcription, DNA-dependent
observed gene count: 74
expected gene count: 32.0192719486081
uncorrected p-value: 2.31851172673741e-11
GO ID	term	observed gene count	expected gene count	uncorrected p-value
GO:0006355	regulation of transcription, DNA-dependent	74	32.0193	2.31851e-11
Cluster 8: small GTPase mediated signal transduction
observed gene count: 23
expected gene count: 4.84502141327623
uncorrected p-value: 2.92742029547474e-10
GO ID	term	observed gene count	expected gene count	uncorrected p-value
GO:0007264	small GTPase mediated signal transduction	23	4.79236	2.31043e-10
Cluster 9: regulation of multicellular organism growth
observed gene count: 47
expected gene count: 18.590136509636
uncorrected p-value: 5.89516872449778e-09
GO ID	term	observed gene count	expected gene count	uncorrected p-value
GO:0040018	positive regulation of multicellular organism growth	46	17.8002	4.25367e-09
GO:0040014	regulation of multicellular organism growth	1	1.26392	0.72713
Cluster 10: determination of adult life span
observed gene count: 83
expected gene count: 42.8152435760171
uncorrected p-value: 8.20093883238757e-09
GO ID	term	observed gene count	expected gene count	uncorrected p-value
GO:0008340	determination of adult life span	83	42.7626	7.7562e-09
Cluster 11: sex differentiation
observed gene count: 76
expected gene count: 38.391528372591
uncorrected p-value: 1.4340815197321e-08
GO ID	term	observed gene count	expected gene count	uncorrected p-value
GO:0040035	hermaphrodite genitalia development	74	37.8649	3.74579e-08
GO:0007548	sex differentiation	3	0.579296	0.0174996
Cluster 12: positive regulation of growth rate
observed gene count: 130
expected gene count: 79.6268736616702
uncorrected p-value: 3.11970816106703e-08
GO ID	term	observed gene count	expected gene count	uncorrected p-value
GO:0040010	positive regulation of growth rate	130	79.4689	2.7832e-08
Cluster 13: protein catabolic process
observed gene count: 30
expected gene count: 10.8486349036403
uncorrected p-value: 4.62115057377592e-07
GO ID	term	observed gene count	expected gene count	uncorrected p-value
GO:0030163	protein catabolic process	27	6.63557	3.78177e-10
GO:0006511	ubiquitin-dependent protein catabolic process	3	3.89708	0.754545
Cluster 14: nucleosome assembly
observed gene count: 18
expected gene count: 5.3189908993576
uncorrected p-value: 5.15589705678316e-06
GO ID	term	observed gene count	expected gene count	uncorrected p-value
GO:0006334	nucleosome assembly	18	4.68703	7.64975e-07
Cluster 15: cell adhesion
observed gene count: 12
expected gene count: 2.58050053533191
uncorrected p-value: 6.5960409894279e-06
GO ID	term	observed gene count	expected gene count	uncorrected p-value
GO:0007160	cell-matrix adhesion	3	0.368643	0.00434952
GO:0007156	homophilic cell adhesion	4	0.737286	0.00501629
GO:0016337	cell-cell adhesion	2	0.263316	0.0249189
GO:0007155	cell adhesion	3	1.21126	0.118122
Cluster 16: secretion by cell
observed gene count: 16
expected gene count: 4.63436830835118
uncorrected p-value: 1.30399867861558e-05
GO ID	term	observed gene count	expected gene count	uncorrected p-value
GO:0032940	secretion by cell	13	3.94975	0.000137163
GO:0006904	vesicle docking during exocytosis	3	0.421306	0.00668772
Cluster 17: morphogenesis of an epithelium
observed gene count: 38
expected gene count: 19.59073875803
uncorrected p-value: 8.33784427398965e-05
GO ID	term	observed gene count	expected gene count	uncorrected p-value
GO:0002009	morphogenesis of an epithelium	38	19.4854	7.44349e-05
Cluster 18: cell fate determination
observed gene count: 16
expected gene count: 5.52964400428266
uncorrected p-value: 0.00012123852914326
GO ID	term	observed gene count	expected gene count	uncorrected p-value
GO:0008105	asymmetric protein localization	6	0.737286	4.41024e-05
GO:0045167	asymmetric protein localization involved in cell fate determination	4	0.947939	0.0129624
GO:0001709	cell fate determination	2	0.263316	0.0249189
GO:0007052	mitotic spindle organization	8	3.84442	0.0378394
Cluster 19: intraflagellar transport
observed gene count: 9
expected gene count: 2.00120449678801
uncorrected p-value: 0.000124372767541642
GO ID	term	observed gene count	expected gene count	uncorrected p-value
GO:0042073	intraflagellar transport	7	0.579296	3.04637e-07
GO:0007018	microtubule-based movement	2	1.42191	0.419644
Cluster 20: cell migration
observed gene count: 16
expected gene count: 5.68763383297645
uncorrected p-value: 0.000169887932857861
GO ID	term	observed gene count	expected gene count	uncorrected p-value
GO:0016477	cell migration	16	5.68763	0.000169888
Cluster 21: chemotaxis
observed gene count: 10
expected gene count: 2.58050053533191
uncorrected p-value: 0.000200204134986093
GO ID	term	observed gene count	expected gene count	uncorrected p-value
GO:0006935	chemotaxis	6	1.10593	0.000579339
GO:0042048	olfactory behavior	3	0.579296	0.0174996
GO:0007635	chemosensory behavior	2	0.473969	0.0780008
GO:0007626	locomotory behavior	1	0.789949	0.555871
Cluster 22: mesoderm development
observed gene count: 6
expected gene count: 1.05326552462527
uncorrected p-value: 0.000433034958258638
GO ID	term	observed gene count	expected gene count	uncorrected p-value
GO:0008078	mesodermal cell migration	3	0.526633	0.013239
GO:0042074	cell migration involved in gastrulation	2	0.31598	0.0360851
GO:0007498	mesoderm development	1	0.105327	0.102554
Cluster 23: endocytosis
observed gene count: 5
expected gene count: 0.895275695931477
uncorrected p-value: 0.00146449464504505
GO ID	term	observed gene count	expected gene count	uncorrected p-value
GO:0006897	endocytosis	4	0.789949	0.0065581
GO:0016044	membrane organization	1	0.105327	0.102554
Cluster 24: regulation of actin filament-based process
observed gene count: 4
expected gene count: 0.579296038543897
uncorrected p-value: 0.00187756360228296
GO ID	term	observed gene count	expected gene count	uncorrected p-value
GO:0032956	regulation of actin cytoskeleton organization	2	0.210653	0.0154898
GO:0032970	regulation of actin filament-based process	2	0.263316	0.0249189
Cluster 25: regulation of axonogenesis
observed gene count: 6
expected gene count: 1.42190845824411
uncorrected p-value: 0.00240931060130386
GO ID	term	observed gene count	expected gene count	uncorrected p-value
GO:0031344	regulation of cell projection organization	2	0.263316	0.0249189
GO:0030516	regulation of axon extension	2	0.526633	0.0941913
GO:0050770	regulation of axonogenesis	1	0.105327	0.102554
GO:0045664	regulation of neuron differentiation	1	0.473969	0.385503
Cluster 26: protein amino acid glycosylation
observed gene count: 7
expected gene count: 1.89587794432548
uncorrected p-value: 0.00241459242552346
GO ID	term	observed gene count	expected gene count	uncorrected p-value
GO:0006486	protein amino acid glycosylation	7	1.79055	0.0017058
Cluster 27: larval foraging behavior
observed gene count: 3
expected gene count: 0.31597965738758
uncorrected p-value: 0.00258664418921055
GO ID	term	observed gene count	expected gene count	uncorrected p-value
GO:0035177	larval foraging behavior	3	0.210653	0.000560507
Cluster 28: proximal/distal pattern formation
observed gene count: 3
expected gene count: 0.31597965738758
uncorrected p-value: 0.00258664418921055
GO ID	term	observed gene count	expected gene count	uncorrected p-value
GO:0010085	polarity specification of proximal/distal axis	3	0.31598	0.00258664
GO:0009954	proximal/distal pattern formation	1	0.0526633	0.0526633
Cluster 29: establishment of cell polarity
observed gene count: 8
expected gene count: 2.47517398286938
uncorrected p-value: 0.00292215777077001
GO ID	term	observed gene count	expected gene count	uncorrected p-value
GO:0051294	establishment of spindle orientation	1	0.0526633	0.0526633
GO:0000132	establishment of mitotic spindle orientation	4	1.47457	0.0573454
GO:0030010	establishment of cell polarity	2	0.421306	0.0628098
GO:0007163	establishment or maintenance of cell polarity	2	0.631959	0.128994
GO:0040001	establishment of mitotic spindle localization	1	0.368643	0.31527
Cluster 30: myofibril assembly
observed gene count: 6
expected gene count: 1.47457173447537
uncorrected p-value: 0.002931366545934
GO ID	term	observed gene count	expected gene count	uncorrected p-value
GO:0030239	myofibril assembly	2	0.105327	0.00277231
GO:0055001	muscle cell development	1	0.0526633	0.0526633
GO:0051146	striated muscle cell differentiation	1	0.0526633	0.0526633
GO:0042692	muscle cell differentiation	1	0.15799	0.149819
GO:0030036	actin cytoskeleton organization	1	0.947939	0.622431
Cluster 31: protein amino acid phosphorylation
observed gene count: 36
expected gene count: 22.2765658458244
uncorrected p-value: 0.00341671910067516
GO ID	term	observed gene count	expected gene count	uncorrected p-value
GO:0006468	protein amino acid phosphorylation	36	22.1712	0.00316427
Cluster 32: cell redox homeostasis
observed gene count: 8
expected gene count: 2.58050053533191
uncorrected p-value: 0.00381906665986646
GO ID	term	observed gene count	expected gene count	uncorrected p-value
GO:0045454	cell redox homeostasis	8	2.42251	0.00254019
Cluster 33: negative regulation of multicellular organism growth
observed gene count: 12
expected gene count: 5.05567451820129
uncorrected p-value: 0.00456722431418753
GO ID	term	observed gene count	expected gene count	uncorrected p-value
GO:0040015	negative regulation of multicellular organism growth	12	5.05567	0.00456722
Cluster 34: apoptosis
observed gene count: 39
expected gene count: 25.6470155246253
uncorrected p-value: 0.00658717197241634
GO ID	term	observed gene count	expected gene count	uncorrected p-value
GO:0006915	apoptosis	34	22.1712	0.00941214
GO:0043068	positive regulation of programmed cell death	3	0.526633	0.013239
GO:0043069	negative regulation of programmed cell death	1	0.15799	0.149819
GO:0012501	programmed cell death	1	0.737286	0.531173
GO:0008219	cell death	2	2.84382	0.784653
Cluster 35: regulation of vulval development
observed gene count: 19
expected gene count: 10.4799919700214
uncorrected p-value: 0.00919415662553201
GO ID	term	observed gene count	expected gene count	uncorrected p-value
GO:0040028	regulation of vulval development	4	0.947939	0.0129624
GO:0040027	negative regulation of vulval development	17	9.74271	0.0186428
Cluster 36: cell-cell signaling
observed gene count: 4
expected gene count: 0.895275695931477
uncorrected p-value: 0.0105130869205421
GO ID	term	observed gene count	expected gene count	uncorrected p-value
GO:0050803	regulation of synapse structure and activity	2	0.210653	0.0154898
GO:0007267	cell-cell signaling	2	0.210653	0.0154898
GO:0007268	synaptic transmission	1	0.526633	0.417871
Cluster 37: ion transport
observed gene count: 21
expected gene count: 12.797176124197
uncorrected p-value: 0.018379838339236
GO ID	term	observed gene count	expected gene count	uncorrected p-value
GO:0006811	ion transport	15	8.3208	0.0200161
GO:0015672	monovalent inorganic cation transport	1	0.210653	0.194595
GO:0030001	metal ion transport	2	0.842612	0.204914
GO:0006812	cation transport	3	3.00181	0.583431
Cluster 38: gonad development
observed gene count: 13
expected gene count: 6.95155246252677
uncorrected p-value: 0.0222023107933393
GO ID	term	observed gene count	expected gene count	uncorrected p-value
GO:0008406	gonad development	13	6.95155	0.0222023
Cluster 39: axonal fasciculation
observed gene count: 9
expected gene count: 4.3183886509636
uncorrected p-value: 0.0284079271627519
GO ID	term	observed gene count	expected gene count	uncorrected p-value
GO:0007413	axonal fasciculation	9	4.31839	0.0284079
Cluster 40: cGMP biosynthetic process
observed gene count: 6
expected gene count: 2.47517398286938
uncorrected p-value: 0.0358984599094486
GO ID	term	observed gene count	expected gene count	uncorrected p-value
GO:0009190	cyclic nucleotide biosynthetic process	5	2.0012	0.047807
GO:0006163	purine nucleotide metabolic process	1	0.0526633	0.0526633
GO:0006182	cGMP biosynthetic process	3	0.895276	0.0570641
Cluster 41: polysaccharide metabolic process
observed gene count: 2
expected gene count: 0.31597965738758
uncorrected p-value: 0.0360850756609013
GO ID	term	observed gene count	expected gene count	uncorrected p-value
GO:0033692	cellular polysaccharide biosynthetic process	1	0.0526633	0.0526633
GO:0005976	polysaccharide metabolic process	1	0.105327	0.102554
Cluster 42: collagen and cuticulin-based cuticle development
observed gene count: 10
expected gene count: 5.26632762312634
uncorrected p-value: 0.0379642399218173
GO ID	term	observed gene count	expected gene count	uncorrected p-value
GO:0040002	collagen and cuticulin-based cuticle development	10	5.21366	0.0357891
Cluster 43: regulation of Rab GTPase activity
observed gene count: 5
expected gene count: 1.94854122055675
uncorrected p-value: 0.0433237179069261
GO ID	term	observed gene count	expected gene count	uncorrected p-value
GO:0032313	regulation of Rab GTPase activity	3	1.10593	0.0957169
GO:0051056	regulation of small GTPase mediated signal transduction	2	0.737286	0.166187
Cluster 44: anterior/posterior pattern formation
observed gene count: 3
expected gene count: 0.842612419700214
uncorrected p-value: 0.0488491774092965
GO ID	term	observed gene count	expected gene count	uncorrected p-value
GO:0009952	anterior/posterior pattern formation	3	0.684623	0.0280416
Cluster 45: positive regulation of gene expression
observed gene count: 8
expected gene count: 4.10773554603854
uncorrected p-value: 0.052645504788518
GO ID	term	observed gene count	expected gene count	uncorrected p-value
GO:0045944	positive regulation of transcription from RNA polymerase II promoter	7	3.73909	0.0795951
GO:0010628	positive regulation of gene expression	1	0.105327	0.102554
Cluster 46: cellular amino acid biosynthetic process
observed gene count: 1
expected gene count: 0.0526632762312634
uncorrected p-value: 0.0526632762312634
GO ID	term	observed gene count	expected gene count	uncorrected p-value
GO:0008652	cellular amino acid biosynthetic process	1	0.0526633	0.0526633
Cluster 47: chitin metabolic process
observed gene count: 6
expected gene count: 2.89648019271949
uncorrected p-value: 0.0683696796210783
GO ID	term	observed gene count	expected gene count	uncorrected p-value
GO:0006030	chitin metabolic process	3	0.737286	0.0343212
GO:0016052	carbohydrate catabolic process	1	0.210653	0.194595
GO:0006032	chitin catabolic process	3	2.0012	0.323586
Cluster 48: excretion
observed gene count: 5
expected gene count: 2.31718415417559
uncorrected p-value: 0.0802362113058548
GO ID	term	observed gene count	expected gene count	uncorrected p-value
GO:0007588	excretion	1	0.105327	0.102554
GO:0030421	defecation	4	2.15919	0.168087
Cluster 49: cellular amino acid biosynthetic process
observed gene count: 1
expected gene count: 0.105326552462527
uncorrected p-value: 0.102554244641916
GO ID	term	observed gene count	expected gene count	uncorrected p-value
GO:0008652	cellular amino acid biosynthetic process	1	0.0526633	0.0526633
Cluster 50: cell cycle
observed gene count: 16
expected gene count: 11.7439105995717
uncorrected p-value: 0.131097164836107
GO ID	term	observed gene count	expected gene count	uncorrected p-value
GO:0007010	cytoskeleton organization	3	0.526633	0.013239
GO:0007052	mitotic spindle organization	8	3.84442	0.0378394
GO:0007017	microtubule-based process	3	1.31658	0.142246
GO:0007049	cell cycle	1	0.842612	0.579268
GO:0051301	cell division	4	6.26693	0.878193
Cluster 51: nuclear migration
observed gene count: 6
expected gene count: 3.47577623126338
uncorrected p-value: 0.133577751955751
GO ID	term	observed gene count	expected gene count	uncorrected p-value
GO:0007097	nuclear migration	2	0.31598	0.0360851
GO:0035046	pronuclear migration	4	2.73849	0.292723
Cluster 52: maintenance of protein location
observed gene count: 1
expected gene count: 0.15798982869379
uncorrected p-value: 0.149818786877037
GO ID	term	observed gene count	expected gene count	uncorrected p-value
GO:0045185	maintenance of protein location	1	0.15799	0.149819
Cluster 53: meiosis
observed gene count: 13
expected gene count: 9.84803265524625
uncorrected p-value: 0.188421471406527
GO ID	term	observed gene count	expected gene count	uncorrected p-value
GO:0007126	meiosis	11	6.26693	0.0495313
GO:0007059	chromosome segregation	1	0.737286	0.531173
GO:0045132	meiotic chromosome segregation	3	6.10894	0.947414
Cluster 54: cellular amino acid biosynthetic process
observed gene count: 1
expected gene count: 0.210653104925054
uncorrected p-value: 0.194595111224743
GO ID	term	observed gene count	expected gene count	uncorrected p-value
GO:0008652	cellular amino acid biosynthetic process	1	0.0526633	0.0526633
Cluster 55: carbohydrate catabolic process
observed gene count: 1
expected gene count: 0.210653104925054
uncorrected p-value: 0.194595111224743
GO ID	term	observed gene count	expected gene count	uncorrected p-value
GO:0016052	carbohydrate catabolic process	1	0.210653	0.194595
Cluster 56: germline cell cycle switching, mitotic to meiotic cell cycle
observed gene count: 3
expected gene count: 1.84321466809422
uncorrected p-value: 0.279726546972905
GO ID	term	observed gene count	expected gene count	uncorrected p-value
GO:0051729	germline cell cycle switching, mitotic to meiotic cell cycle	3	1.84321	0.279727
Cluster 57: dauer entry
observed gene count: 5
expected gene count: 3.63376605995717
uncorrected p-value: 0.297988028017532
GO ID	term	observed gene count	expected gene count	uncorrected p-value
GO:0040024	dauer larval development	4	2.84382	0.316783
GO:0043053	dauer entry	1	0.947939	0.622431
Cluster 58: mitosis
observed gene count: 4
expected gene count: 2.94914346895075
uncorrected p-value: 0.340992971236671
GO ID	term	observed gene count	expected gene count	uncorrected p-value
GO:0000087	M phase of mitotic cell cycle	1	0.263316	0.237014
GO:0007067	mitosis	3	2.68583	0.507551
Cluster 59: oogenesis
observed gene count: 15
expected gene count: 14.1664213062099
uncorrected p-value: 0.447690994314711
GO ID	term	observed gene count	expected gene count	uncorrected p-value
GO:0048477	oogenesis	13	9.9007	0.193357
GO:0007276	gamete generation	3	4.47638	0.831574
Cluster 60: mannose metabolic process
observed gene count: 1
expected gene count: 0.579296038543897
uncorrected p-value: 0.448534330073479
GO ID	term	observed gene count	expected gene count	uncorrected p-value
GO:0006013	mannose metabolic process	1	0.15799	0.149819
Cluster 61: embryonic pattern specification
observed gene count: 1
expected gene count: 0.631959314775161
uncorrected p-value: 0.477583446485351
GO ID	term	observed gene count	expected gene count	uncorrected p-value
GO:0009880	embryonic pattern specification	1	0.631959	0.477583
Cluster 62: phospholipid biosynthetic process
observed gene count: 1
expected gene count: 0.631959314775161
uncorrected p-value: 0.477583446485351
GO ID	term	observed gene count	expected gene count	uncorrected p-value
GO:0008654	phospholipid biosynthetic process	1	0.631959	0.477583
Cluster 63: RNA processing
observed gene count: 3
expected gene count: 2.68582708779443
uncorrected p-value: 0.507551146475213
GO ID	term	observed gene count	expected gene count	uncorrected p-value
GO:0006396	RNA processing	2	1.68522	0.508017
GO:0006397	mRNA processing	1	0.789949	0.555871

## Sheet: DMM401_N2all_L1-DSN
sample name: DMM401_N2all_L1-DSN
number of associated genes in the sample: 3311
Cluster 1: proton transport
observed gene count: 102
expected gene count: 28.8028640256959
uncorrected p-value: 5.00907581160945e-30
GO ID	term	observed gene count	expected gene count	uncorrected p-value
GO:0055085	transmembrane transport	101	26.1441	3.66634e-33
GO:0015992	proton transport	1	0.590828	0.458728
Cluster 2: phosphorylation
observed gene count: 101
expected gene count: 31.2400294432548
uncorrected p-value: 2.44372527860144e-26
GO ID	term	observed gene count	expected gene count	uncorrected p-value
GO:0006468	protein amino acid phosphorylation	100	31.0923	6.65266e-26
GO:0016310	phosphorylation	1	0.0738535	0.0738535
Cluster 3: ion transport
observed gene count: 72
expected gene count: 20.1620048179872
uncorrected p-value: 7.63251590022643e-22
GO ID	term	observed gene count	expected gene count	uncorrected p-value
GO:0006811	ion transport	39	11.6689	1.50595e-11
GO:0006814	sodium ion transport	19	3.76653	1.44927e-09
GO:0006812	cation transport	18	4.20965	7.70354e-08
GO:0006813	potassium ion transport	9	2.51102	0.000620744
GO:0030001	metal ion transport	2	1.18166	0.333162
Cluster 4: regulation of transcription, DNA-dependent
observed gene count: 115
expected gene count: 44.9029264810849
uncorrected p-value: 8.64611477813417e-21
GO ID	term	observed gene count	expected gene count	uncorrected p-value
GO:0006355	regulation of transcription, DNA-dependent	115	44.9029	8.64611e-21
Cluster 5: cGMP biosynthetic process
observed gene count: 20
expected gene count: 3.47111438258387
uncorrected p-value: 3.05797607679042e-11
GO ID	term	observed gene count	expected gene count	uncorrected p-value
GO:0009190	cyclic nucleotide biosynthetic process	19	2.80643	2.69523e-12
GO:0006182	cGMP biosynthetic process	7	1.25551	0.000119364
GO:0006164	purine nucleotide biosynthetic process	1	0.369267	0.318618
Cluster 6: secretion
observed gene count: 17
expected gene count: 3.24955389007852
uncorrected p-value: 5.51090555870089e-09
GO ID	term	observed gene count	expected gene count	uncorrected p-value
GO:0030421	defecation	16	3.02799	1.30731e-08
GO:0046903	secretion	1	0.0738535	0.0738535
Cluster 7: transforming growth factor beta receptor signaling pathway
observed gene count: 9
expected gene count: 1.03394896502498
uncorrected p-value: 9.1976877470265e-08
GO ID	term	observed gene count	expected gene count	uncorrected p-value
GO:0007179	transforming growth factor beta receptor signaling pathway	8	0.886242	3.31622e-07
GO:0007178	transmembrane receptor protein serine/threonine kinase signaling pathway	1	0.147707	0.142254
Cluster 8: intraflagellar transport
observed gene count: 14
expected gene count: 2.80643290506781
uncorrected p-value: 2.47193255896599e-07
GO ID	term	observed gene count	expected gene count	uncorrected p-value
GO:0007018	microtubule-based movement	9	1.99404	8.89312e-05
GO:0042073	intraflagellar transport	5	0.812388	0.000693117
Cluster 9: dauer entry
observed gene count: 19
expected gene count: 5.09589132762313
uncorrected p-value: 3.8019708501185e-07
GO ID	term	observed gene count	expected gene count	uncorrected p-value
GO:0040024	dauer larval development	14	3.98809	2.69371e-05
GO:0043053	dauer entry	7	1.32936	0.000182869
Cluster 10: growth
observed gene count: 253
expected gene count: 186.849348679515
uncorrected p-value: 4.32998130282061e-07
GO ID	term	observed gene count	expected gene count	uncorrected p-value
GO:0040010	positive regulation of growth rate	161	111.445	1.63522e-06
GO:0040007	growth	140	112.257	0.00411774
GO:0002119	nematode larval development	165	135.817	0.0054071
GO:0009791	post-embryonic development	1	1.18166	0.707058
Cluster 11: determination of adult life span
observed gene count: 92
expected gene count: 60.0428934689508
uncorrected p-value: 3.20496285917809e-05
GO ID	term	observed gene count	expected gene count	uncorrected p-value
GO:0008340	determination of adult life span	92	59.969	3.06026e-05
Cluster 12: chemotaxis
observed gene count: 11
expected gene count: 2.65872591006424
uncorrected p-value: 3.71879597969869e-05
GO ID	term	observed gene count	expected gene count	uncorrected p-value
GO:0006935	chemotaxis	8	1.55092	7.44311e-05
GO:0007626	locomotory behavior	3	1.1078	0.0939388
Cluster 13: oviposition
observed gene count: 44
expected gene count: 24.4455076730906
uncorrected p-value: 0.000116095392815457
GO ID	term	observed gene count	expected gene count	uncorrected p-value
GO:0018991	oviposition	41	23.5593	0.000394481
GO:0048609	reproductive process in a multicellular organism	2	0.369267	0.0469152
GO:0032504	multicellular organism reproduction	1	0.516974	0.415558
Cluster 14: collagen and cuticulin-based cuticle development
observed gene count: 19
expected gene count: 7.38534975017844
uncorrected p-value: 0.000119342057929615
GO ID	term	observed gene count	expected gene count	uncorrected p-value
GO:0040002	collagen and cuticulin-based cuticle development	19	7.3115	0.000103777
Cluster 15: regulation of multicellular organism growth
observed gene count: 46
expected gene count: 26.0702846181299
uncorrected p-value: 0.000132224431666688
GO ID	term	observed gene count	expected gene count	uncorrected p-value
GO:0040018	positive regulation of multicellular organism growth	43	24.9625	0.000360509
GO:0040014	regulation of multicellular organism growth	4	1.77248	0.0966665
Cluster 16: phospholipid catabolic process
observed gene count: 6
expected gene count: 0.960095467523198
uncorrected p-value: 0.000175925934409654
GO ID	term	observed gene count	expected gene count	uncorrected p-value
GO:0006685	sphingomyelin catabolic process	3	0.22156	0.000402484
GO:0009395	phospholipid catabolic process	1	0.0738535	0.0738535
GO:0006665	sphingolipid metabolic process	2	0.516974	0.0892752
Cluster 17: anion transport
observed gene count: 6
expected gene count: 1.03394896502498
uncorrected p-value: 0.000288610027062424
GO ID	term	observed gene count	expected gene count	uncorrected p-value
GO:0008272	sulfate transport	5	0.590828	0.000101472
GO:0006820	anion transport	1	0.443121	0.368946
Cluster 18: regulation of pH
observed gene count: 5
expected gene count: 0.738534975017844
uncorrected p-value: 0.000402570026657677
GO ID	term	observed gene count	expected gene count	uncorrected p-value
GO:0006885	regulation of pH	5	0.738535	0.00040257
Cluster 19: chitin catabolic process
observed gene count: 13
expected gene count: 4.65277034261242
uncorrected p-value: 0.000600469138625614
GO ID	term	observed gene count	expected gene count	uncorrected p-value
GO:0006032	chitin catabolic process	12	2.80643	1.13522e-05
GO:0016998	cell wall macromolecule catabolic process	3	0.960095	0.0658343
Cluster 20: regulation of transcription from RNA polymerase II promoter
observed gene count: 18
expected gene count: 8.567005710207
uncorrected p-value: 0.0021310620324295
GO ID	term	observed gene count	expected gene count	uncorrected p-value
GO:0045944	positive regulation of transcription from RNA polymerase II promoter	14	5.2436	0.000610172
GO:0006357	regulation of transcription from RNA polymerase II promoter	4	3.10185	0.376361
Cluster 21: lipid biosynthetic process
observed gene count: 9
expected gene count: 2.95413990007138
uncorrected p-value: 0.00216456356008613
GO ID	term	observed gene count	expected gene count	uncorrected p-value
GO:0006636	unsaturated fatty acid biosynthetic process	3	0.369267	0.00359249
GO:0006631	fatty acid metabolic process	4	1.25551	0.0324847
GO:0006633	fatty acid biosynthetic process	3	1.1078	0.0939388
GO:0008610	lipid biosynthetic process	1	0.369267	0.318618
Cluster 22: secretion by cell
observed gene count: 18
expected gene count: 9.74866167023555
uncorrected p-value: 0.00851245739660203
GO ID	term	observed gene count	expected gene count	uncorrected p-value
GO:0032940	secretion by cell	11	5.53901	0.0214524
GO:0048489	synaptic vesicle transport	3	1.03395	0.0793425
GO:0007269	neurotransmitter secretion	1	0.22156	0.205605
GO:0016079	synaptic vesicle exocytosis	1	0.22156	0.205605
GO:0007268	synaptic transmission	1	0.738535	0.535739
GO:0006836	neurotransmitter transport	1	1.32936	0.748744
Cluster 23: cilium assembly
observed gene count: 8
expected gene count: 3.02799339757316
uncorrected p-value: 0.00929868661858487
GO ID	term	observed gene count	expected gene count	uncorrected p-value
GO:0035058	sensory cilium assembly	4	0.886242	0.00907919
GO:0042384	cilium assembly	3	0.664681	0.024109
GO:0030031	cell projection assembly	1	0.295414	0.264277
GO:0000902	cell morphogenesis	1	0.664681	0.49871
Cluster 24: tail tip morphogenesis
observed gene count: 11
expected gene count: 4.94818433261956
uncorrected p-value: 0.00962170982277686
GO ID	term	observed gene count	expected gene count	uncorrected p-value
GO:0045138	tail tip morphogenesis	11	4.87433	0.00860199
GO:0007178	transmembrane receptor protein serine/threonine kinase signaling pathway	1	0.147707	0.142254
Cluster 25: trehalose metabolic process
observed gene count: 3
expected gene count: 0.516974482512491
uncorrected p-value: 0.0112333831274104
GO ID	term	observed gene count	expected gene count	uncorrected p-value
GO:0005991	trehalose metabolic process	3	0.369267	0.00359249
Cluster 26: deoxyribonucleoside diphosphate metabolic process
observed gene count: 3
expected gene count: 0.516974482512491
uncorrected p-value: 0.0112333831274104
GO ID	term	observed gene count	expected gene count	uncorrected p-value
GO:0009186	deoxyribonucleoside diphosphate metabolic process	3	0.516974	0.0112334
Cluster 27: regulation of cell growth
observed gene count: 6
expected gene count: 1.99404443254818
uncorrected p-value: 0.012404025252429
GO ID	term	observed gene count	expected gene count	uncorrected p-value
GO:0030516	regulation of axon extension	3	0.738535	0.0325812
GO:0045664	regulation of neuron differentiation	2	0.664681	0.138872
GO:0001558	regulation of cell growth	1	0.147707	0.142254
GO:0031344	regulation of cell projection organization	1	0.369267	0.318618
Cluster 28: lipid catabolic process
observed gene count: 3
expected gene count: 0.590827980014276
uncorrected p-value: 0.0169944644524373
GO ID	term	observed gene count	expected gene count	uncorrected p-value
GO:0009395	phospholipid catabolic process	1	0.0738535	0.0738535
GO:0016042	lipid catabolic process	2	0.516974	0.0892752
Cluster 29: amino acid transport
observed gene count: 3
expected gene count: 0.590827980014276
uncorrected p-value: 0.0169944644524373
GO ID	term	observed gene count	expected gene count	uncorrected p-value
GO:0006835	dicarboxylic acid transport	2	0.443121	0.0669776
GO:0006865	amino acid transport	1	0.0738535	0.0738535
Cluster 30: protein catabolic process
observed gene count: 24
expected gene count: 15.2138204853676
uncorrected p-value: 0.0180341305729452
GO ID	term	observed gene count	expected gene count	uncorrected p-value
GO:0030163	protein catabolic process	19	9.30554	0.00228518
GO:0044257	cellular protein catabolic process	1	0.0738535	0.0738535
GO:0006511	ubiquitin-dependent protein catabolic process	4	5.46516	0.805349
Cluster 31: regulation of pharyngeal pumping
observed gene count: 7
expected gene count: 2.80643290506781
uncorrected p-value: 0.0197866578113163
GO ID	term	observed gene count	expected gene count	uncorrected p-value
GO:0043051	regulation of pharyngeal pumping	7	2.65873	0.0148772
Cluster 32: regulation of GTPase activity
observed gene count: 9
expected gene count: 4.13579586009993
uncorrected p-value: 0.0207808696197773
GO ID	term	observed gene count	expected gene count	uncorrected p-value
GO:0043087	regulation of GTPase activity	1	0.147707	0.142254
GO:0035023	regulation of Rho protein signal transduction	3	1.47707	0.180133
GO:0032313	regulation of Rab GTPase activity	3	1.55092	0.19937
GO:0051056	regulation of small GTPase mediated signal transduction	2	1.03395	0.277039
Cluster 33: molting cycle, collagen and cuticulin-based cuticle
observed gene count: 29
expected gene count: 19.7927373304782
uncorrected p-value: 0.0253286729975454
GO ID	term	observed gene count	expected gene count	uncorrected p-value
GO:0018996	molting cycle, collagen and cuticulin-based cuticle	29	19.7927	0.0253287
Cluster 34: homeostatic process
observed gene count: 8
expected gene count: 3.61882137758744
uncorrected p-value: 0.0260833986342032
GO ID	term	observed gene count	expected gene count	uncorrected p-value
GO:0045454	cell redox homeostasis	7	3.39726	0.050481
GO:0042592	homeostatic process	1	0.0738535	0.0738535
Cluster 35: regulation of vulval development
observed gene count: 25
expected gene count: 16.9124509279086
uncorrected p-value: 0.0325984112915823
GO ID	term	observed gene count	expected gene count	uncorrected p-value
GO:0040027	negative regulation of vulval development	21	13.6629	0.0328674
GO:0040028	regulation of vulval development	3	1.32936	0.143381
GO:0040026	positive regulation of vulval development	4	3.1757	0.393506
Cluster 36: positive regulation of cell size
observed gene count: 3
expected gene count: 0.812388472519629
uncorrected p-value: 0.0423898762408061
GO ID	term	observed gene count	expected gene count	uncorrected p-value
GO:0046622	positive regulation of organ growth	3	0.295414	0.00152084
GO:0045793	positive regulation of cell size	3	0.369267	0.00359249
Cluster 37: biopolymer glycosylation
observed gene count: 6
expected gene count: 2.65872591006424
uncorrected p-value: 0.0464813690760294
GO ID	term	observed gene count	expected gene count	uncorrected p-value
GO:0043413	biopolymer glycosylation	1	0.0738535	0.0738535
GO:0006486	protein amino acid glycosylation	5	2.51102	0.102392
Cluster 38: rRNA processing
observed gene count: 5
expected gene count: 2.06789793004996
uncorrected p-value: 0.0517758304179838
GO ID	term	observed gene count	expected gene count	uncorrected p-value
GO:0006364	rRNA processing	3	1.18166	0.109538
GO:0042254	ribosome biogenesis	2	0.886242	0.220649
Cluster 39: cytoskeleton organization
observed gene count: 5
expected gene count: 2.21560492505353
uncorrected p-value: 0.0665675718988843
GO ID	term	observed gene count	expected gene count	uncorrected p-value
GO:0007010	cytoskeleton organization	2	0.738535	0.165444
GO:0030029	actin filament-based process	1	0.22156	0.205605
GO:0030036	actin cytoskeleton organization	2	1.32936	0.387951
Cluster 40: histidine catabolic process
observed gene count: 1
expected gene count: 0.0738534975017844
uncorrected p-value: 0.0738534975017844
GO ID	term	observed gene count	expected gene count	uncorrected p-value
GO:0006548	histidine catabolic process	1	0.0738535	0.0738535
Cluster 41: molybdopterin cofactor biosynthetic process
observed gene count: 2
expected gene count: 0.590827980014276
uncorrected p-value: 0.113368818150359
GO ID	term	observed gene count	expected gene count	uncorrected p-value
GO:0006777	Mo-molybdopterin cofactor biosynthetic process	2	0.516974	0.0892752
GO:0032324	molybdopterin cofactor biosynthetic process	1	0.147707	0.142254
Cluster 42: morphogenesis of an epithelium
observed gene count: 34
expected gene count: 27.4735010706638
uncorrected p-value: 0.117056286436335
GO ID	term	observed gene count	expected gene count	uncorrected p-value
GO:0002009	morphogenesis of an epithelium	34	27.3258	0.111132
Cluster 43: methylation
observed gene count: 2
expected gene count: 0.66468147751606
uncorrected p-value: 0.138871618268721
GO ID	term	observed gene count	expected gene count	uncorrected p-value
GO:0006730	one-carbon metabolic process	1	0.147707	0.142254
GO:0032259	methylation	1	0.443121	0.368946
Cluster 44: protein complex assembly
observed gene count: 1
expected gene count: 0.147706995003569
uncorrected p-value: 0.142254181621514
GO ID	term	observed gene count	expected gene count	uncorrected p-value
GO:0006461	protein complex assembly	1	0.147707	0.142254
Cluster 45: cell migration
observed gene count: 11
expected gene count: 7.97617773019272
uncorrected p-value: 0.173701804709095
GO ID	term	observed gene count	expected gene count	uncorrected p-value
GO:0016477	cell migration	11	7.97618	0.173702
Cluster 46: axon guidance
observed gene count: 9
expected gene count: 6.35140078515346
uncorrected p-value: 0.183483977863456
GO ID	term	observed gene count	expected gene count	uncorrected p-value
GO:0030182	neuron differentiation	3	0.590828	0.0169945
GO:0007411	axon guidance	5	4.1358	0.398623
GO:0048812	neuron projection morphogenesis	1	0.590828	0.458728
Cluster 47: purine ribonucleoside monophosphate biosynthetic process
observed gene count: 1
expected gene count: 0.221560492505353
uncorrected p-value: 0.205604536398475
GO ID	term	observed gene count	expected gene count	uncorrected p-value
GO:0009168	purine ribonucleoside monophosphate biosynthetic process	1	0.22156	0.205605
Cluster 48: sex differentiation
observed gene count: 60
expected gene count: 53.8391996788009
uncorrected p-value: 0.207465714582913
GO ID	term	observed gene count	expected gene count	uncorrected p-value
GO:0040035	hermaphrodite genitalia development	59	53.1007	0.216468
GO:0007548	sex differentiation	1	0.812388	0.570034
Cluster 49: gonad development
observed gene count: 12
expected gene count: 9.74866167023555
uncorrected p-value: 0.269347577223852
GO ID	term	observed gene count	expected gene count	uncorrected p-value
GO:0008406	gonad development	12	9.74866	0.269348
Cluster 50: endocytosis
observed gene count: 3
expected gene count: 1.99404443254818
uncorrected p-value: 0.32150860043623
GO ID	term	observed gene count	expected gene count	uncorrected p-value
GO:0043277	apoptotic cell clearance	2	0.590828	0.113369
GO:0006897	endocytosis	1	1.1078	0.683689
Cluster 51: sensory perception of chemical stimulus
observed gene count: 15
expected gene count: 13.367483047823
uncorrected p-value: 0.360057414700573
GO ID	term	observed gene count	expected gene count	uncorrected p-value
GO:0007606	sensory perception of chemical stimulus	15	13.3675	0.360057
Cluster 52: DNA repair
observed gene count: 10
expected gene count: 8.64085920770878
uncorrected p-value: 0.363407399202702
GO ID	term	observed gene count	expected gene count	uncorrected p-value
GO:0006974	response to DNA damage stimulus	9	6.12984	0.158394
GO:0006281	DNA repair	1	2.80643	0.945889
Cluster 53: regulation of striated muscle contraction
observed gene count: 1
expected gene count: 0.516974482512491
uncorrected p-value: 0.415557737619332
GO ID	term	observed gene count	expected gene count	uncorrected p-value
GO:0006942	regulation of striated muscle contraction	1	0.0738535	0.0738535
Cluster 54: RNA processing
observed gene count: 4
expected gene count: 3.61882137758744
uncorrected p-value: 0.493865958841065
GO ID	term	observed gene count	expected gene count	uncorrected p-value
GO:0008033	tRNA processing	2	1.25551	0.360777
GO:0006396	RNA processing	2	2.36331	0.695179
Cluster 55: aromatic amino acid family metabolic process
observed gene count: 1
expected gene count: 0.738534975017844
uncorrected p-value: 0.535739063394331
GO ID	term	observed gene count	expected gene count	uncorrected p-value
GO:0009072	aromatic amino acid family metabolic process	1	0.738535	0.535739
Cluster 56: nucleoside metabolic process
observed gene count: 1
expected gene count: 0.738534975017844
uncorrected p-value: 0.535739063394331
GO ID	term	observed gene count	expected gene count	uncorrected p-value
GO:0009116	nucleoside metabolic process	1	0.664681	0.49871
Cluster 57: glycolysis
observed gene count: 2
expected gene count: 1.77248394004283
uncorrected p-value: 0.537915826291391
GO ID	term	observed gene count	expected gene count	uncorrected p-value
GO:0006096	glycolysis	2	0.812388	0.19279
Cluster 58: negative regulation of transcription, DNA-dependent
observed gene count: 4
expected gene count: 4.20964935760171
uncorrected p-value: 0.615115138978854
GO ID	term	observed gene count	expected gene count	uncorrected p-value
GO:0045892	negative regulation of transcription, DNA-dependent	1	0.738535	0.535739
GO:0000122	negative regulation of transcription from RNA polymerase II promoter	3	2.95414	0.574893
Cluster 59: chromosome organization
observed gene count: 1
expected gene count: 1.03394896502498
uncorrected p-value: 0.65845701988041
GO ID	term	observed gene count	expected gene count	uncorrected p-value
GO:0051276	chromosome organization	1	0.590828	0.458728
Cluster 60: apoptosis
observed gene count: 32
expected gene count: 35.301971805853
uncorrected p-value: 0.743719386336066
GO ID	term	observed gene count	expected gene count	uncorrected p-value
GO:0012501	programmed cell death	3	1.03395	0.0793425
GO:0006915	apoptosis	28	31.0923	0.744787
GO:0008219	cell death	2	3.98809	0.915895
Cluster 61: embryonic morphogenesis
observed gene count: 6
expected gene count: 7.38534975017844
uncorrected p-value: 0.756459072245678
GO ID	term	observed gene count	expected gene count	uncorrected p-value
GO:0001703	gastrulation with mouth forming first	4	4.72662	0.704999
GO:0048598	embryonic morphogenesis	2	2.43717	0.711363
Cluster 62: protein transport
observed gene count: 9
expected gene count: 10.9303176302641
uncorrected p-value: 0.772364178688985
GO ID	term	observed gene count	expected gene count	uncorrected p-value
GO:0008104	protein localization	5	2.28946	0.0747551
GO:0034613	cellular protein localization	1	0.22156	0.205605
GO:0045184	establishment of protein localization	1	0.22156	0.205605
GO:0015031	protein transport	1	4.20965	0.987425
GO:0006886	intracellular protein transport	1	4.43121	0.990014
Cluster 63: negative regulation of multicellular organism growth
observed gene count: 5
expected gene count: 7.08993576017131
uncorrected p-value: 0.845615245563607
GO ID	term	observed gene count	expected gene count	uncorrected p-value
GO:0040015	negative regulation of multicellular organism growth	5	7.08994	0.845615
Cluster 64: oogenesis
observed gene count: 15
expected gene count: 19.86659082798
uncorrected p-value: 0.899460427754159
GO ID	term	observed gene count	expected gene count	uncorrected p-value
GO:0007276	gamete generation	5	6.27755	0.761225
GO:0048477	oogenesis	11	13.8845	0.827227
Cluster 65: meiosis
observed gene count: 9
expected gene count: 14.9184064953605
uncorrected p-value: 0.966340455509932
GO ID	term	observed gene count	expected gene count	uncorrected p-value
GO:0000278	mitotic cell cycle	1	0.0738535	0.0738535
GO:0007059	chromosome segregation	1	1.03395	0.658457
GO:0007049	cell cycle	1	1.18166	0.707058
GO:0007126	meiosis	4	8.78857	0.979099
GO:0045132	meiotic chromosome segregation	3	8.56701	0.992868
Cluster 66: translation
observed gene count: 6
expected gene count: 12.4812410778016
uncorrected p-value: 0.987677520190495
GO ID	term	observed gene count	expected gene count	uncorrected p-value
GO:0006418	tRNA aminoacylation for protein translation	2	2.14175	0.642099
GO:0006412	translation	4	10.1918	0.992763

## Sheet: DMM401-N2all_L1-V
sample name: DMM401-N2all_L1-V
number of associated genes in the sample: 2198
Cluster 1: phosphorylation
observed gene count: 55
expected gene count: 20.7386241970021
uncorrected p-value: 5.56899241483609e-11
GO ID	term	observed gene count	expected gene count	uncorrected p-value
GO:0006468	protein amino acid phosphorylation	54	20.6406	1.38485e-10
GO:0016310	phosphorylation	1	0.0490275	0.0490275
Cluster 2: chemotaxis (chemotaxis/cilium)
observed gene count: 12
expected gene count: 3.38289614561028
uncorrected p-value: 0.000122265163546837
GO ID	term	observed gene count	expected gene count	uncorrected p-value
GO:0006935	chemotaxis	7	1.02958	4.267e-05
GO:0035058	sensory cilium assembly	3	0.58833	0.0185555
GO:0042384	cilium assembly	2	0.441247	0.0687647
GO:0007626	locomotory behavior	2	0.735412	0.165708
GO:0030031	cell projection assembly	1	0.19611	0.182159
GO:0000902	cell morphogenesis	1	0.441247	0.363946
Cluster 3: acyl-CoA metabolic process
observed gene count: 6
expected gene count: 0.882494646680942
uncorrected p-value: 0.000153634748691771
GO ID	term	observed gene count	expected gene count	uncorrected p-value
GO:0006637	acyl-CoA metabolic process	4	0.490275	0.000953286
GO:0006777	Mo-molybdopterin cofactor biosynthetic process	2	0.343192	0.042799
GO:0032324	molybdopterin cofactor biosynthetic process	1	0.098055	0.0956523
Cluster 4: defecation
observed gene count: 9
expected gene count: 2.15720913633119
uncorrected p-value: 0.000240039303868597
GO ID	term	observed gene count	expected gene count	uncorrected p-value
GO:0030421	defecation	9	2.01013	0.00013544
Cluster 5: positive regulation of growth rate (positive growth regulation)
observed gene count: 103
expected gene count: 74.1295503211991
uncorrected p-value: 0.000519493935582696
GO ID	term	observed gene count	expected gene count	uncorrected p-value
GO:0040010	positive regulation of growth rate	103	73.9825	0.000485626
Cluster 6: chemotaxis
observed gene count: 11
expected gene count: 3.77511598857959
uncorrected p-value: 0.00129795501259254
GO ID	term	observed gene count	expected gene count	uncorrected p-value
GO:0006935	chemotaxis	7	1.02958	4.267e-05
GO:0042073	intraflagellar transport	5	0.539302	0.000101587
GO:0007018	microtubule-based movement	3	1.32374	0.144259
Cluster 7: cGMP biosynthetic process (nucleotide metabolism)
observed gene count: 9
expected gene count: 2.89262134189864
uncorrected p-value: 0.00220073029382078
GO ID	term	observed gene count	expected gene count	uncorrected p-value
GO:0009190	cyclic nucleotide biosynthetic process	9	1.86304	7.19692e-05
GO:0006182	cGMP biosynthetic process	3	0.833467	0.0478311
Cluster 8: regulation of multicellular organism growth (growth regulation)
observed gene count: 30
expected gene count: 17.3067005710207
uncorrected p-value: 0.00264018784699899
GO ID	term	observed gene count	expected gene count	uncorrected p-value
GO:0040018	positive regulation of multicellular organism growth	29	16.5713	0.0026812
GO:0040014	regulation of multicellular organism growth	1	1.17666	0.700847
Cluster 9: ion transport
observed gene count: 24
expected gene count: 12.894227337616
uncorrected p-value: 0.00273406061306083
GO ID	term	observed gene count	expected gene count	uncorrected p-value
GO:0006814	sodium ion transport	8	2.5004	0.0031908
GO:0006811	ion transport	14	7.74634	0.023808
GO:0006812	cation transport	5	2.79457	0.146563
Cluster 10: dauer entry (dauer entry / dormancy)
observed gene count: 11
expected gene count: 4.41247323340471
uncorrected p-value: 0.00453570575655919
GO ID	term	observed gene count	expected gene count	uncorrected p-value
GO:0040024	dauer larval development	7	2.64748	0.0159024
GO:0006972	hyperosmotic response	3	0.833467	0.0478311
GO:0043053	dauer entry	3	0.882495	0.055368
Cluster 11: determination of adult life span
observed gene count: 56
expected gene count: 39.8593415417559
uncorrected p-value: 0.00711549098785018
GO ID	term	observed gene count	expected gene count	uncorrected p-value
GO:0008340	determination of adult life span	56	39.8103	0.00694764
Cluster 12: oviposition
observed gene count: 27
expected gene count: 16.2280960028551
uncorrected p-value: 0.00713403437291209
GO ID	term	observed gene count	expected gene count	uncorrected p-value
GO:0048609	reproductive process in a multicellular organism	2	0.245137	0.021758
GO:0018991	oviposition	24	15.6398	0.0257767
GO:0032504	multicellular organism reproduction	1	0.343192	0.29666
Cluster 13: protein catabolic process
observed gene count: 13
expected gene count: 6.91287473233405
uncorrected p-value: 0.0215216245691008
GO ID	term	observed gene count	expected gene count	uncorrected p-value
GO:0030163	protein catabolic process	13	6.17746	0.00905435
Cluster 14: response to heat
observed gene count: 5
expected gene count: 1.66693433261956
uncorrected p-value: 0.0240010027932487
GO ID	term	observed gene count	expected gene count	uncorrected p-value
GO:0009408	response to heat	5	1.61791	0.0213074
Cluster 15: fatty acid biosynthetic process
observed gene count: 5
expected gene count: 1.96109921484654
uncorrected p-value: 0.0447003297477074
GO ID	term	observed gene count	expected gene count	uncorrected p-value
GO:0006636	unsaturated fatty acid biosynthetic process	4	0.245137	2.76856e-05
GO:0006633	fatty acid biosynthetic process	3	0.735412	0.0344045
Cluster 16: histidine catabolic process
observed gene count: 1
expected gene count: 0.0490274803711635
uncorrected p-value: 0.0490274803711634
GO ID	term	observed gene count	expected gene count	uncorrected p-value
GO:0006548	histidine catabolic process	1	0.0490275	0.0490275
Cluster 17: collagen and cuticulin-based cuticle development
observed gene count: 9
expected gene count: 4.90274803711635
uncorrected p-value: 0.0569629786549721
GO ID	term	observed gene count	expected gene count	uncorrected p-value
GO:0040002	collagen and cuticulin-based cuticle development	9	4.85372	0.0540798
Cluster 18: sex differentiation
observed gene count: 45
expected gene count: 35.7410331905782
uncorrected p-value: 0.0685742643113149
GO ID	term	observed gene count	expected gene count	uncorrected p-value
GO:0040035	hermaphrodite genitalia development	44	35.2508	0.0788218
GO:0007548	sex differentiation	1	0.539302	0.424798
Cluster 19: molting cycle, collagen and cuticulin-based cuticle
observed gene count: 19
expected gene count: 13.1393647394718
uncorrected p-value: 0.0698400255444057
GO ID	term	observed gene count	expected gene count	uncorrected p-value
GO:0018996	molting cycle, collagen and cuticulin-based cuticle	19	13.1394	0.06984
Cluster 20: glycolysis
observed gene count: 3
expected gene count: 1.17665952890792
uncorrected p-value: 0.110911639605819
GO ID	term	observed gene count	expected gene count	uncorrected p-value
GO:0006096	glycolysis	3	0.539302	0.0144357
Cluster 21: regulation of pharyngeal pumping
observed gene count: 4
expected gene count: 1.86304425410421
uncorrected p-value: 0.11409699613831
GO ID	term	observed gene count	expected gene count	uncorrected p-value
GO:0043051	regulation of pharyngeal pumping	4	1.76499	0.0981221
Cluster 22: growth
observed gene count: 103
expected gene count: 92.2697180585296
uncorrected p-value: 0.132928488258428
GO ID	term	observed gene count	expected gene count	uncorrected p-value
GO:0040007	growth	81	74.5218	0.232496
GO:0002119	nematode larval development	92	90.1615	0.435467
Cluster 23: regulation of transcription, DNA-dependent
observed gene count: 36
expected gene count: 29.8087080656674
uncorrected p-value: 0.141546254864829
GO ID	term	observed gene count	expected gene count	uncorrected p-value
GO:0006355	regulation of transcription, DNA-dependent	36	29.8087	0.141546
Cluster 24: myosin filament assembly
observed gene count: 4
expected gene count: 2.15720913633119
uncorrected p-value: 0.168017606800442
GO ID	term	observed gene count	expected gene count	uncorrected p-value
GO:0030241	muscle thick filament assembly	2	0.19611	0.0134917
GO:0031034	myosin filament assembly	1	0.098055	0.0956523
GO:0006461	protein complex assembly	1	0.098055	0.0956523
GO:0030036	actin cytoskeleton organization	1	0.882495	0.595473
Cluster 25: regulation of Rho protein signal transduction
observed gene count: 3
expected gene count: 1.61790685224839
uncorrected p-value: 0.218645574536719
GO ID	term	observed gene count	expected gene count	uncorrected p-value
GO:0035023	regulation of Rho protein signal transduction	3	0.98055	0.0720028
Cluster 26: cell migration
observed gene count: 7
expected gene count: 5.29496788008565
uncorrected p-value: 0.279160071325708
GO ID	term	observed gene count	expected gene count	uncorrected p-value
GO:0016477	cell migration	7	5.29497	0.27916
Cluster 27: negative regulation of multicellular organism growth
observed gene count: 6
expected gene count: 4.70663811563169
uncorrected p-value: 0.331312707262268
GO ID	term	observed gene count	expected gene count	uncorrected p-value
GO:0040015	negative regulation of multicellular organism growth	6	4.70664	0.331313
Cluster 28: regulation of transcription from RNA polymerase II promoter
observed gene count: 7
expected gene count: 5.68718772305496
uncorrected p-value: 0.342212075815497
GO ID	term	observed gene count	expected gene count	uncorrected p-value
GO:0006357	regulation of transcription from RNA polymerase II promoter	3	2.05915	0.339683
GO:0045944	positive regulation of transcription from RNA polymerase II promoter	4	3.48095	0.461933
Cluster 29: chitin catabolic process
observed gene count: 4
expected gene count: 3.0887312633833
uncorrected p-value: 0.373104979888495
GO ID	term	observed gene count	expected gene count	uncorrected p-value
GO:0016998	cell wall macromolecule catabolic process	3	0.637357	0.0232571
GO:0006032	chitin catabolic process	3	1.86304	0.285292
Cluster 30: positive regulation of vulval development
observed gene count: 12
expected gene count: 11.2272930049964
uncorrected p-value: 0.448566025429789
GO ID	term	observed gene count	expected gene count	uncorrected p-value
GO:0040026	positive regulation of vulval development	4	2.10818	0.158471
GO:0040027	negative regulation of vulval development	10	9.07008	0.422038
Cluster 31: gonad development
observed gene count: 7
expected gene count: 6.47162740899358
uncorrected p-value: 0.470966665583099
GO ID	term	observed gene count	expected gene count	uncorrected p-value
GO:0008406	gonad development	7	6.47163	0.470967
Cluster 32: protein transport
observed gene count: 7
expected gene count: 7.30509457530335
uncorrected p-value: 0.599665094177548
GO ID	term	observed gene count	expected gene count	uncorrected p-value
GO:0045184	establishment of protein localization	1	0.147082	0.139992
GO:0008104	protein localization	2	1.51985	0.45319
GO:0015031	protein transport	2	2.79457	0.775845
GO:0006886	intracellular protein transport	2	2.94165	0.799681
Cluster 33: apoptosis
observed gene count: 22
expected gene count: 23.4351356174161
uncorrected p-value: 0.65010792932579
GO ID	term	observed gene count	expected gene count	uncorrected p-value
GO:0012501	programmed cell death	2	0.686385	0.148201
GO:0008219	cell death	3	2.64748	0.497556
GO:0006915	apoptosis	17	20.6406	0.825418
Cluster 34: morphogenesis of an epithelium
observed gene count: 17
expected gene count: 18.2382226980728
uncorrected p-value: 0.651385920543777
GO ID	term	observed gene count	expected gene count	uncorrected p-value
GO:0002009	morphogenesis of an epithelium	17	18.1402	0.642718
Cluster 35: cell redox homeostasis
observed gene count: 2
expected gene count: 2.40234653818701
uncorrected p-value: 0.699876435716832
GO ID	term	observed gene count	expected gene count	uncorrected p-value
GO:0045454	cell redox homeostasis	2	2.25526	0.666297
Cluster 36: oogenesis
observed gene count: 11
expected gene count: 13.188392219843
uncorrected p-value: 0.771508524773664
GO ID	term	observed gene count	expected gene count	uncorrected p-value
GO:0007276	gamete generation	4	4.16734	0.604218
GO:0048477	oogenesis	8	9.21717	0.707652
Cluster 37: synaptic transmission
observed gene count: 1
expected gene count: 1.56887937187723
uncorrected p-value: 0.799955267704093
GO ID	term	observed gene count	expected gene count	uncorrected p-value
GO:0007268	synaptic transmission	1	0.490275	0.395137
Cluster 38: RNA processing
observed gene count: 1
expected gene count: 1.56887937187723
uncorrected p-value: 0.799955267704093
GO ID	term	observed gene count	expected gene count	uncorrected p-value
GO:0006396	RNA processing	1	1.56888	0.799955
Cluster 39: neuron projection morphogenesis
observed gene count: 1
expected gene count: 1.71596181299072
uncorrected p-value: 0.827978970947838
GO ID	term	observed gene count	expected gene count	uncorrected p-value
GO:0048812	neuron projection morphogenesis	1	0.39222	0.331148
Cluster 40: mitosis
observed gene count: 8
expected gene count: 11.6685403283369
uncorrected p-value: 0.901377868706287
GO ID	term	observed gene count	expected gene count	uncorrected p-value
GO:0000278	mitotic cell cycle	1	0.0490275	0.0490275
GO:0007049	cell cycle	1	0.78444	0.552671
GO:0007067	mitosis	2	2.5004	0.720667
GO:0007126	meiosis	4	5.83427	0.840582
GO:0045132	meiotic chromosome segregation	2	5.68719	0.979628
Cluster 41: vesicle-mediated transport
observed gene count: 1
expected gene count: 3.38289614561028
uncorrected p-value: 0.968924589757379
GO ID	term	observed gene count	expected gene count	uncorrected p-value
GO:0016192	vesicle-mediated transport	1	2.54943	0.926874

## Sheet: DMM402_N2all_L1-DSN
sample name: DMM402_N2all_L1-DSN
number of associated genes in the sample: 3237
Cluster 1: transmembrane transport
observed gene count: 105
expected gene count: 28.8089534261242
uncorrected p-value: 6.12565567552661e-32
GO ID	term	observed gene count	expected gene count	uncorrected p-value
GO:0055085	transmembrane transport	103	25.5598	1.95497e-35
GO:0006754	ATP biosynthetic process	1	0.216609	0.201349
GO:0006164	purine nucleotide biosynthetic process	1	0.361014	0.312524
Cluster 2: regulation of transcription, DNA-dependent
observed gene count: 120
expected gene count: 43.8993576017131
uncorrected p-value: 4.49708519701652e-24
GO ID	term	observed gene count	expected gene count	uncorrected p-value
GO:0006355	regulation of transcription, DNA-dependent	120	43.8994	4.49709e-24
Cluster 3: regulation of multicellular organism growth
observed gene count: 55
expected gene count: 25.4876204496788
uncorrected p-value: 6.04426909607908e-08
GO ID	term	observed gene count	expected gene count	uncorrected p-value
GO:0040018	positive regulation of multicellular organism growth	54	24.4046	3.37726e-08
GO:0040014	regulation of multicellular organism growth	4	1.73287	0.0906706
Cluster 4: amine transport
observed gene count: 7
expected gene count: 0.57762312633833
uncorrected p-value: 7.62205759275497e-08
GO ID	term	observed gene count	expected gene count	uncorrected p-value
GO:0006835	dicarboxylic acid transport	5	0.433217	1.10349e-05
GO:0015837	amine transport	1	0.0722029	0.0722029
GO:0006865	amino acid transport	1	0.0722029	0.0722029
Cluster 5: ion transport
observed gene count: 38
expected gene count: 17.5453024625268
uncorrected p-value: 5.67202239986453e-06
GO ID	term	observed gene count	expected gene count	uncorrected p-value
GO:0006812	cation transport	16	4.11556	1.75427e-06
GO:0006813	potassium ion transport	8	2.4549	0.00242983
GO:0030001	metal ion transport	3	1.15525	0.104019
GO:0006811	ion transport	15	11.4081	0.168936
Cluster 6: determination of adult life span
observed gene count: 92
expected gene count: 58.7009502141328
uncorrected p-value: 1.37101207917763e-05
GO ID	term	observed gene count	expected gene count	uncorrected p-value
GO:0008340	determination of adult life span	92	58.6287	1.30689e-05
Cluster 7: dauer entry
observed gene count: 16
expected gene count: 4.98199946466809
uncorrected p-value: 2.5296223931052e-05
GO ID	term	observed gene count	expected gene count	uncorrected p-value
GO:0040024	dauer larval development	13	3.89896	9.44254e-05
GO:0043053	dauer entry	5	1.29965	0.00756261
Cluster 8: protein amino acid phosphorylation
observed gene count: 51
expected gene count: 30.5418228051392
uncorrected p-value: 0.000238159829007332
GO ID	term	observed gene count	expected gene count	uncorrected p-value
GO:0006468	protein amino acid phosphorylation	51	30.3974	0.0002124
Cluster 9: 'de novo' IMP biosynthetic process
observed gene count: 4
expected gene count: 0.433217344753747
uncorrected p-value: 0.00036141966804146
GO ID	term	observed gene count	expected gene count	uncorrected p-value
GO:0006189	'de novo' IMP biosynthetic process	3	0.216609	0.000376089
GO:0009168	purine ribonucleoside monophosphate biosynthetic process	1	0.216609	0.201349
Cluster 10: tail tip morphogenesis
observed gene count: 15
expected gene count: 5.84843415417559
uncorrected p-value: 0.000627017219282113
GO ID	term	observed gene count	expected gene count	uncorrected p-value
GO:0045138	tail tip morphogenesis	13	4.76539	0.000773216
GO:0007179	transforming growth factor beta receptor signaling pathway	5	0.866435	0.00100683
GO:0046622	positive regulation of organ growth	3	0.288812	0.00142296
GO:0045793	positive regulation of cell size	3	0.361014	0.00336566
GO:0008361	regulation of cell size	1	0.433217	0.362167
Cluster 11: positive regulation of transcription, DNA-dependent
observed gene count: 19
expected gene count: 8.37553533190578
uncorrected p-value: 0.000642489327400117
GO ID	term	observed gene count	expected gene count	uncorrected p-value
GO:0045944	positive regulation of transcription from RNA polymerase II promoter	17	5.12641	9.04425e-06
GO:0045893	positive regulation of transcription, DNA-dependent	2	0.433217	0.0643076
GO:0006357	regulation of transcription from RNA polymerase II promoter	3	3.03252	0.592752
Cluster 12: fatty acid metabolic process
observed gene count: 8
expected gene count: 2.31049250535332
uncorrected p-value: 0.00160172047212338
GO ID	term	observed gene count	expected gene count	uncorrected p-value
GO:0006631	fatty acid metabolic process	5	1.22745	0.0058024
GO:0006633	fatty acid biosynthetic process	3	1.08304	0.0891022
Cluster 13: secretion
observed gene count: 9
expected gene count: 3.17692719486081
uncorrected p-value: 0.00370043761506409
GO ID	term	observed gene count	expected gene count	uncorrected p-value
GO:0030421	defecation	8	2.96032	0.0081566
GO:0046903	secretion	1	0.0722029	0.0722029
Cluster 14: collagen and cuticulin-based cuticle development
observed gene count: 15
expected gene count: 7.22028907922912
uncorrected p-value: 0.00537907024903807
GO ID	term	observed gene count	expected gene count	uncorrected p-value
GO:0040002	collagen and cuticulin-based cuticle development	15	7.14809	0.00489132
Cluster 15: molting cycle, collagen and cuticulin-based cuticle
observed gene count: 31
expected gene count: 19.350374732334
uncorrected p-value: 0.00654935368654859
GO ID	term	observed gene count	expected gene count	uncorrected p-value
GO:0018996	molting cycle, collagen and cuticulin-based cuticle	31	19.3504	0.00654935
Cluster 16: anion transport
observed gene count: 4
expected gene count: 0.866434689507495
uncorrected p-value: 0.00838569202615565
GO ID	term	observed gene count	expected gene count	uncorrected p-value
GO:0006820	anion transport	2	0.433217	0.0643076
GO:0006817	phosphate transport	2	0.433217	0.0643076
Cluster 17: response to oxidative stress
observed gene count: 9
expected gene count: 3.61014453961456
uncorrected p-value: 0.00886224099146807
GO ID	term	observed gene count	expected gene count	uncorrected p-value
GO:0006979	response to oxidative stress	9	2.67151	0.00102557
Cluster 18: glycine catabolic process
observed gene count: 3
expected gene count: 0.57762312633833
uncorrected p-value: 0.0159825425784712
GO ID	term	observed gene count	expected gene count	uncorrected p-value
GO:0006546	glycine catabolic process	3	0.50542	0.0105511
Cluster 19: lysosome organization
observed gene count: 4
expected gene count: 1.22744914346895
uncorrected p-value: 0.0302019753278869
GO ID	term	observed gene count	expected gene count	uncorrected p-value
GO:0006665	sphingolipid metabolic process	3	0.50542	0.0105511
GO:0007040	lysosome organization	1	0.577623	0.450961
Cluster 20: fatty acid beta-oxidation
observed gene count: 3
expected gene count: 0.722028907922912
uncorrected p-value: 0.0307178102140914
GO ID	term	observed gene count	expected gene count	uncorrected p-value
GO:0006635	fatty acid beta-oxidation	3	0.722029	0.0307178
Cluster 21: regulation of pH
observed gene count: 3
expected gene count: 0.722028907922912
uncorrected p-value: 0.0307178102140914
GO ID	term	observed gene count	expected gene count	uncorrected p-value
GO:0006885	regulation of pH	3	0.722029	0.0307178
Cluster 22: iron ion transport
observed gene count: 2
expected gene count: 0.361014453961456
uncorrected p-value: 0.0449950020151893
GO ID	term	observed gene count	expected gene count	uncorrected p-value
GO:0006826	iron ion transport	1	0.144406	0.139194
GO:0000041	transition metal ion transport	1	0.216609	0.201349
Cluster 23: phospholipid biosynthetic process
observed gene count: 3
expected gene count: 0.866434689507495
uncorrected p-value: 0.0505577191222153
GO ID	term	observed gene count	expected gene count	uncorrected p-value
GO:0008654	phospholipid biosynthetic process	3	0.866435	0.0505577
Cluster 24: chitin catabolic process
observed gene count: 8
expected gene count: 4.1155647751606
uncorrected p-value: 0.0512640007550039
GO ID	term	observed gene count	expected gene count	uncorrected p-value
GO:0016052	carbohydrate catabolic process	3	0.288812	0.00142296
GO:0006032	chitin catabolic process	5	2.74371	0.136249
Cluster 25: cell redox homeostasis
observed gene count: 7
expected gene count: 3.53794164882227
uncorrected p-value: 0.0608553667305118
GO ID	term	observed gene count	expected gene count	uncorrected p-value
GO:0045454	cell redox homeostasis	7	3.32133	0.0456109
Cluster 26: histidine catabolic process
observed gene count: 1
expected gene count: 0.0722028907922912
uncorrected p-value: 0.0722028907922911
GO ID	term	observed gene count	expected gene count	uncorrected p-value
GO:0006548	histidine catabolic process	1	0.0722029	0.0722029
Cluster 27: positive regulation of growth rate
observed gene count: 124
expected gene count: 109.170770877944
uncorrected p-value: 0.0756709935772961
GO ID	term	observed gene count	expected gene count	uncorrected p-value
GO:0040010	positive regulation of growth rate	124	108.954	0.0725239
Cluster 28: glycolysis
observed gene count: 4
expected gene count: 1.73286937901499
uncorrected p-value: 0.0906705945405744
GO ID	term	observed gene count	expected gene count	uncorrected p-value
GO:0016052	carbohydrate catabolic process	3	0.288812	0.00142296
GO:0006096	glycolysis	1	0.794232	0.561528
Cluster 29: anterior/posterior pattern formation
observed gene count: 3
expected gene count: 1.15524625267666
uncorrected p-value: 0.104019380075733
GO ID	term	observed gene count	expected gene count	uncorrected p-value
GO:0009952	anterior/posterior pattern formation	3	0.938638	0.0622964
Cluster 30: feeding behavior
observed gene count: 5
expected gene count: 2.59930406852248
uncorrected p-value: 0.114817405169097
GO ID	term	observed gene count	expected gene count	uncorrected p-value
GO:0043050	pharyngeal pumping	3	1.51626	0.190399
GO:0007631	feeding behavior	2	1.15525	0.323154
Cluster 31: regulation of feeding behavior
observed gene count: 5
expected gene count: 2.74370985010707
uncorrected p-value: 0.136248777927997
GO ID	term	observed gene count	expected gene count	uncorrected p-value
GO:0060259	regulation of feeding behavior	1	0.216609	0.201349
GO:0043051	regulation of pharyngeal pumping	4	2.5993	0.260359
Cluster 32: fatty acid biosynthetic process
observed gene count: 3
expected gene count: 1.29965203426124
uncorrected p-value: 0.13647080116324
GO ID	term	observed gene count	expected gene count	uncorrected p-value
GO:0006633	fatty acid biosynthetic process	3	1.08304	0.0891022
GO:0006636	unsaturated fatty acid biosynthetic process	1	0.361014	0.312524
Cluster 33: regulation of fatty acid metabolic process
observed gene count: 1
expected gene count: 0.144405781584582
uncorrected p-value: 0.139194018416153
GO ID	term	observed gene count	expected gene count	uncorrected p-value
GO:0019217	regulation of fatty acid metabolic process	1	0.144406	0.139194
Cluster 34: aromatic amino acid family metabolic process
observed gene count: 2
expected gene count: 0.722028907922912
uncorrected p-value: 0.159529478670052
GO ID	term	observed gene count	expected gene count	uncorrected p-value
GO:0009072	aromatic amino acid family metabolic process	2	0.722029	0.159529
Cluster 35: response to heat
observed gene count: 4
expected gene count: 2.4548982869379
uncorrected p-value: 0.228252235680658
GO ID	term	observed gene count	expected gene count	uncorrected p-value
GO:0009408	response to heat	4	2.3827	0.212593
Cluster 36: endocytosis
observed gene count: 7
expected gene count: 4.98199946466809
uncorrected p-value: 0.229334287035517
GO ID	term	observed gene count	expected gene count	uncorrected p-value
GO:0006897	endocytosis	2	1.08304	0.295762
GO:0016192	vesicle-mediated transport	5	3.75455	0.321384
Cluster 37: oviposition
observed gene count: 27
expected gene count: 23.8991568522484
uncorrected p-value: 0.282630884303843
GO ID	term	observed gene count	expected gene count	uncorrected p-value
GO:0018991	oviposition	26	23.0327	0.288661
GO:0032504	multicellular organism reproduction	1	0.50542	0.408227
Cluster 38: sensory perception of chemical stimulus
observed gene count: 15
expected gene count: 13.0687232334047
uncorrected p-value: 0.327989906254683
GO ID	term	observed gene count	expected gene count	uncorrected p-value
GO:0007606	sensory perception of chemical stimulus	15	13.0687	0.32799
Cluster 39: tricarboxylic acid cycle
observed gene count: 2
expected gene count: 1.29965203426124
uncorrected p-value: 0.376986763784459
GO ID	term	observed gene count	expected gene count	uncorrected p-value
GO:0006099	tricarboxylic acid cycle	2	0.938638	0.24063
Cluster 40: regulation of vulval development
observed gene count: 18
expected gene count: 16.9676793361884
uncorrected p-value: 0.432673475599683
GO ID	term	observed gene count	expected gene count	uncorrected p-value
GO:0042659	regulation of cell fate specification	5	1.37185	0.00966252
GO:0040028	regulation of vulval development	3	1.29965	0.136471
GO:0040027	negative regulation of vulval development	13	13.3575	0.58136
GO:0040026	positive regulation of vulval development	3	3.10472	0.608932
Cluster 41: protein catabolic process
observed gene count: 11
expected gene count: 10.1806076017131
uncorrected p-value: 0.440369810584897
GO ID	term	observed gene count	expected gene count	uncorrected p-value
GO:0030163	protein catabolic process	11	9.09756	0.301287
Cluster 42: cytoskeleton organization
observed gene count: 2
expected gene count: 2.16608672376874
uncorrected p-value: 0.648013959623918
GO ID	term	observed gene count	expected gene count	uncorrected p-value
GO:0007010	cytoskeleton organization	1	0.722029	0.527397
GO:0030036	actin cytoskeleton organization	1	1.29965	0.740559
Cluster 43: small GTPase mediated signal transduction
observed gene count: 6
expected gene count: 6.64266595289079
uncorrected p-value: 0.660267516297139
GO ID	term	observed gene count	expected gene count	uncorrected p-value
GO:0007264	small GTPase mediated signal transduction	6	6.57046	0.649792
Cluster 44: oogenesis
observed gene count: 17
expected gene count: 19.4225776231263
uncorrected p-value: 0.74950098315945
GO ID	term	observed gene count	expected gene count	uncorrected p-value
GO:0048477	oogenesis	14	13.5741	0.492266
GO:0007276	gamete generation	4	6.13725	0.870493
Cluster 45: cell migration
observed gene count: 6
expected gene count: 7.79791220556745
uncorrected p-value: 0.800157809046204
GO ID	term	observed gene count	expected gene count	uncorrected p-value
GO:0016477	cell migration	6	7.79791	0.800158
Cluster 46: negative regulation of multicellular organism growth
observed gene count: 5
expected gene count: 6.93147751605996
uncorrected p-value: 0.83116967266728
GO ID	term	observed gene count	expected gene count	uncorrected p-value
GO:0040015	negative regulation of multicellular organism growth	5	6.93148	0.83117
Cluster 47: protein transport
observed gene count: 8
expected gene count: 10.6860278372591
uncorrected p-value: 0.845654395308249
GO ID	term	observed gene count	expected gene count	uncorrected p-value
GO:0006886	intracellular protein transport	5	4.33217	0.438168
GO:0015031	protein transport	3	4.11556	0.789395
GO:0008104	protein localization	1	2.23829	0.90212
Cluster 48: meiosis
observed gene count: 13
expected gene count: 16.606664882227
uncorrected p-value: 0.854293216088383
GO ID	term	observed gene count	expected gene count	uncorrected p-value
GO:0007010	cytoskeleton organization	1	0.722029	0.527397
GO:0007017	microtubule-based process	2	1.80507	0.547696
GO:0007049	cell cycle	1	1.15525	0.69859
GO:0007052	mitotic spindle organization	4	5.27081	0.781793
GO:0007126	meiosis	5	8.59214	0.936879
Cluster 49: morphogenesis of an epithelium
observed gene count: 22
expected gene count: 26.8594753747323
uncorrected p-value: 0.860910635612387
GO ID	term	observed gene count	expected gene count	uncorrected p-value
GO:0002009	morphogenesis of an epithelium	22	26.7151	0.854612
Cluster 50: post-embryonic development
observed gene count: 119
expected gene count: 133.647550856531
uncorrected p-value: 0.919443483436266
GO ID	term	observed gene count	expected gene count	uncorrected p-value
GO:0009791	post-embryonic development	2	1.15525	0.323154
GO:0002119	nematode larval development	118	132.781	0.921993
Cluster 51: tRNA processing
observed gene count: 1
expected gene count: 3.53794164882227
uncorrected p-value: 0.974630581207843
GO ID	term	observed gene count	expected gene count	uncorrected p-value
GO:0008033	tRNA processing	1	1.22745	0.72036
Cluster 52: apoptosis
observed gene count: 23
expected gene count: 34.5129817987152
uncorrected p-value: 0.987496137419438
GO ID	term	observed gene count	expected gene count	uncorrected p-value
GO:0008219	cell death	4	3.89896	0.55341
GO:0012501	programmed cell death	1	1.01084	0.649834
GO:0006915	apoptosis	19	30.3974	0.991456
Cluster 53: gonad development
observed gene count: 4
expected gene count: 9.53078158458244
uncorrected p-value: 0.987944268072864
GO ID	term	observed gene count	expected gene count	uncorrected p-value
GO:0008406	gonad development	4	9.53078	0.987944
Cluster 54: sex differentiation
observed gene count: 36
expected gene count: 52.6359073875803
uncorrected p-value: 0.995246631719953
GO ID	term	observed gene count	expected gene count	uncorrected p-value
GO:0007548	sex differentiation	2	0.794232	0.186088
GO:0040035	hermaphrodite genitalia development	34	51.9139	0.997627

## Sheet: DMM402-N2all_L1-V
sample name: DMM402-N2all_L1-V
number of associated genes in the sample: 1445
Cluster 1: determination of adult life span
observed gene count: 56
expected gene count: 26.2041622055675
uncorrected p-value: 1.18198092341869e-07
GO ID	term	observed gene count	expected gene count	uncorrected p-value
GO:0008340	determination of adult life span	56	26.1719	1.13531e-07
Cluster 2: positive regulation of growth rate
observed gene count: 82
expected gene count: 48.7339400428266
uncorrected p-value: 3.8723969423886e-06
GO ID	term	observed gene count	expected gene count	uncorrected p-value
GO:0040010	positive regulation of growth rate	82	48.6372	3.59595e-06
Cluster 3: regulation of multicellular organism growth
observed gene count: 29
expected gene count: 11.377698965025
uncorrected p-value: 4.97966881425732e-06
GO ID	term	observed gene count	expected gene count	uncorrected p-value
GO:0040018	positive regulation of multicellular organism growth	29	10.8942	2.12378e-06
GO:0040014	regulation of multicellular organism growth	2	0.773555	0.180333
Cluster 4: molting cycle, collagen and cuticulin-based cuticle
observed gene count: 22
expected gene count: 8.63802640970735
uncorrected p-value: 6.6722295974739e-05
GO ID	term	observed gene count	expected gene count	uncorrected p-value
GO:0018996	molting cycle, collagen and cuticulin-based cuticle	22	8.63803	6.67223e-05
Cluster 5: lipid biosynthetic process
observed gene count: 4
expected gene count: 0.547934511063526
uncorrected p-value: 0.00182746337908558
GO ID	term	observed gene count	expected gene count	uncorrected p-value
GO:0008610	lipid biosynthetic process	2	0.161157	0.00972935
GO:0008654	phospholipid biosynthetic process	2	0.386777	0.0553075
Cluster 6: glycolysis
observed gene count: 4
expected gene count: 0.77355460385439
uncorrected p-value: 0.00682166685048954
GO ID	term	observed gene count	expected gene count	uncorrected p-value
GO:0016052	carbohydrate catabolic process	2	0.128926	0.00596491
GO:0006096	glycolysis	2	0.354546	0.0470746
Cluster 7: lipid biosynthetic process
observed gene count: 5
expected gene count: 1.32148911491792
uncorrected p-value: 0.00988826022117508
GO ID	term	observed gene count	expected gene count	uncorrected p-value
GO:0008610	lipid biosynthetic process	2	0.161157	0.00972935
GO:0006631	fatty acid metabolic process	2	0.547935	0.102628
GO:0006636	unsaturated fatty acid biosynthetic process	1	0.161157	0.151104
Cluster 8: growth
observed gene count: 132
expected gene count: 109.329050678087
uncorrected p-value: 0.0141611116673638
GO ID	term	observed gene count	expected gene count	uncorrected p-value
GO:0040007	growth	76	48.9918	0.000123426
GO:0002119	nematode larval development	88	59.2736	0.000165962
GO:0009792	embryonic development ending in birth or egg hatching	109	94.7927	0.0715249
Cluster 9: oogenesis
observed gene count: 16
expected gene count: 8.67025785153462
uncorrected p-value: 0.0144708369105495
GO ID	term	observed gene count	expected gene count	uncorrected p-value
GO:0048477	oogenesis	13	6.05951	0.0082608
GO:0007276	gamete generation	3	2.73967	0.519147
Cluster 10: regulation of transcription, DNA-dependent
observed gene count: 30
expected gene count: 19.5967166309779
uncorrected p-value: 0.0150379004296473
GO ID	term	observed gene count	expected gene count	uncorrected p-value
GO:0006355	regulation of transcription, DNA-dependent	30	19.5967	0.0150379
Cluster 11: tricarboxylic acid cycle
observed gene count: 3
expected gene count: 0.580165952890792
uncorrected p-value: 0.0189867661574944
GO ID	term	observed gene count	expected gene count	uncorrected p-value
GO:0006099	tricarboxylic acid cycle	3	0.419009	0.00750021
Cluster 12: ion transport
observed gene count: 43
expected gene count: 30.9099527123483
uncorrected p-value: 0.0197854409588065
GO ID	term	observed gene count	expected gene count	uncorrected p-value
GO:0046034	ATP metabolic process	4	0.22562	3.47964e-05
GO:0015992	proton transport	4	0.257852	6.7809e-05
GO:0055085	transmembrane transport	22	11.4099	0.00281872
GO:0015986	ATP synthesis coupled proton transport	3	0.547935	0.016204
GO:0006812	cation transport	5	1.83719	0.0363893
GO:0034220	ion transmembrane transport	1	0.22562	0.204951
GO:0006468	protein amino acid phosphorylation	11	13.5694	0.799607
GO:0006811	ion transport	2	5.09257	0.964849
Cluster 13: response to heat
observed gene count: 4
expected gene count: 1.09586902212705
uncorrected p-value: 0.0231163723826783
GO ID	term	observed gene count	expected gene count	uncorrected p-value
GO:0009408	response to heat	4	1.06364	0.0209164
Cluster 14: histidine catabolic process
observed gene count: 1
expected gene count: 0.0322314418272662
uncorrected p-value: 0.0322314418272663
GO ID	term	observed gene count	expected gene count	uncorrected p-value
GO:0006548	histidine catabolic process	1	0.0322314	0.0322314
Cluster 15: collagen and cuticulin-based cuticle development
observed gene count: 7
expected gene count: 3.22314418272662
uncorrected p-value: 0.0430479187703217
GO ID	term	observed gene count	expected gene count	uncorrected p-value
GO:0040002	collagen and cuticulin-based cuticle development	7	3.19091	0.0411295
Cluster 16: mechanosensory behavior
observed gene count: 3
expected gene count: 0.838017487508922
uncorrected p-value: 0.0500732036255275
GO ID	term	observed gene count	expected gene count	uncorrected p-value
GO:0007638	mechanosensory behavior	3	0.773555	0.0408563
GO:0009612	response to mechanical stimulus	2	0.547935	0.102628
Cluster 17: positive regulation of transcription, DNA-dependent
observed gene count: 4
expected gene count: 1.57934064953605
uncorrected p-value: 0.0727141317245412
GO ID	term	observed gene count	expected gene count	uncorrected p-value
GO:0006357	regulation of transcription from RNA polymerase II promoter	4	1.35372	0.0456774
GO:0045893	positive regulation of transcription, DNA-dependent	1	0.193389	0.178469
Cluster 18: protein catabolic process
observed gene count: 8
expected gene count: 4.54463329764454
uncorrected p-value: 0.0865805200781165
GO ID	term	observed gene count	expected gene count	uncorrected p-value
GO:0030163	protein catabolic process	8	4.06116	0.0516212
Cluster 19: negative regulation of multicellular organism growth
observed gene count: 6
expected gene count: 3.09421841541756
uncorrected p-value: 0.0901347901982839
GO ID	term	observed gene count	expected gene count	uncorrected p-value
GO:0040015	negative regulation of multicellular organism growth	6	3.09422	0.0901348
Cluster 20: morphogenesis of an epithelium
observed gene count: 16
expected gene count: 11.990096359743
uncorrected p-value: 0.150374655404545
GO ID	term	observed gene count	expected gene count	uncorrected p-value
GO:0002009	morphogenesis of an epithelium	16	11.9256	0.145743
Cluster 21: defecation
observed gene count: 3
expected gene count: 1.41818344039971
uncorrected p-value: 0.168470760431
GO ID	term	observed gene count	expected gene count	uncorrected p-value
GO:0030421	defecation	3	1.32149	0.145151
Cluster 22: oviposition
observed gene count: 13
expected gene count: 10.6686072448251
uncorrected p-value: 0.272773889266515
GO ID	term	observed gene count	expected gene count	uncorrected p-value
GO:0018991	oviposition	13	10.2818	0.232411
Cluster 23: cell redox homeostasis
observed gene count: 2
expected gene count: 1.57934064953605
uncorrected p-value: 0.471556679583735
GO ID	term	observed gene count	expected gene count	uncorrected p-value
GO:0045454	cell redox homeostasis	2	1.48265	0.439086
Cluster 24: cell cycle
observed gene count: 2
expected gene count: 1.61157209136331
uncorrected p-value: 0.482126394212258
GO ID	term	observed gene count	expected gene count	uncorrected p-value
GO:0007049	cell cycle	1	0.515703	0.408022
GO:0007017	microtubule-based process	1	0.805786	0.559251
Cluster 25: sex differentiation
observed gene count: 23
expected gene count: 23.4967210920771
uncorrected p-value: 0.571367651985152
GO ID	term	observed gene count	expected gene count	uncorrected p-value
GO:0007548	sex differentiation	2	0.354546	0.0470746
GO:0040035	hermaphrodite genitalia development	21	23.1744	0.707886
Cluster 26: protein transport
observed gene count: 7
expected gene count: 7.50992594575303
uncorrected p-value: 0.627116870407091
GO ID	term	observed gene count	expected gene count	uncorrected p-value
GO:0007264	small GTPase mediated signal transduction	5	2.93306	0.170527
GO:0016192	vesicle-mediated transport	2	1.67603	0.502868
GO:0015031	protein transport	2	1.83719	0.552304
GO:0006886	intracellular protein transport	1	1.93389	0.860132
Cluster 27: cell migration
observed gene count: 3
expected gene count: 3.48099571734475
uncorrected p-value: 0.680476020029197
GO ID	term	observed gene count	expected gene count	uncorrected p-value
GO:0016477	cell migration	3	3.481	0.680476
Cluster 28: actin cytoskeleton organization
observed gene count: 1
expected gene count: 1.22479478943612
uncorrected p-value: 0.712200274997142
GO ID	term	observed gene count	expected gene count	uncorrected p-value
GO:0030036	actin cytoskeleton organization	1	0.580166	0.445581
Cluster 29: regulation of vulval development
observed gene count: 4
expected gene count: 6.41405692362598
uncorrected p-value: 0.886630228308066
GO ID	term	observed gene count	expected gene count	uncorrected p-value
GO:0040028	regulation of vulval development	1	0.580166	0.445581
GO:0040027	negative regulation of vulval development	3	5.96282	0.939639
Cluster 30: sensory perception of chemical stimulus
observed gene count: 2
expected gene count: 5.83389097073519
uncorrected p-value: 0.981474693025015
GO ID	term	observed gene count	expected gene count	uncorrected p-value
GO:0007606	sensory perception of chemical stimulus	2	5.83389	0.981475

[truncated: 8 more sheets: DMM383-all-nrn_L1-V, DMM391-all-nrn_L1-V, DMM386-NSML_NSMR-nrn_L1, DMM387-NSML_NSMR-nrn_L1-V, DMM389_NSM_L1, DMM408_Amot_nrn_L2-DSN, DMM414_Amot_nrn_L2-DSN, DMM415_Amot_nrn_L2-DSN]
