# Supplementary material for: Comparison of D. melanogaster and C. elegans developmental stages, tissues, and cells by modENCODE RNA-seq data
Source: HighWire-hosted journal article supplement (doi:10.1101/gr.170100.113), 2014-07-01
Supplement: Supplemental_Files.zip [file TableS7A Genes in Stage Pairs.xls]

## Sheet: WEE_50-0-FEmbryo0-2h
fly gene ID	fly gene name	fly GO terms	worm gene ID	worm gene name	worm GO terms
FBgn0015754	Lis-1	germarium-derived oocyte differentiation, female germ-line cyst formation, fusome organization, oogenesis, regulation of catalytic activity, protein localization, germarium-derived oocyte fate determination, nucleus localization, oocyte fate determination, cytoplasmic transport, nurse cell to oocyte, oogenesis, oocyte nucleus migration involved in oocyte dorsal/ventral axis specification, chorion…	WBGene00003047	lis-1	embryo development ending in birth or egg hatching, embryo development ending in birth or egg hatching, locomotion, vulval development, reproduction, pronuclear migration, embryo development ending in birth or egg hatching, embryo development ending in birth or egg hatching, embryo development ending in birth or egg hatching, pronuclear migration, mitotic spindle organization, embryo development …
FBgn0004066	Pros28.1	proteolysis, ubiquitin-dependent protein catabolic process, proteasomal ubiquitin-dependent protein catabolic process, ubiquitin-dependent protein catabolic process, response to DNA damage stimulus	WBGene00003925	pas-4	ubiquitin-dependent protein catabolic process, proteolysis involved in cellular protein catabolic process, positive regulation of growth rate, embryo development ending in birth or egg hatching, nematode larval development, embryo development ending in birth or egg hatching, reproduction, embryo development ending in birth or egg hatching, growth, nematode larval development, locomotion, nematode…
FBgn0015929	dpa	DNA replication, DNA replication, DNA endoreduplication, DNA replication, DNA replication, mitotic spindle organization, DNA replication, DNA-dependent DNA replication initiation	WBGene00003156	mcm-4	DNA replication, DNA-dependent DNA replication initiation, embryo development ending in birth or egg hatching, nucleus organization, embryo development ending in birth or egg hatching, growth, nematode larval development, embryo development ending in birth or egg hatching, embryo development ending in birth or egg hatching, embryo development ending in birth or egg hatching, nucleus organization,…
FBgn0029756	CG3309		WBGene00018777	F53H1.3	determination of adult lifespan
FBgn0040347	mus81	reciprocal meiotic recombination, DNA metabolic process, mitotic cell cycle G2/M transition DNA damage checkpoint	WBGene00016602	mus-81	DNA repair, DNA metabolic process, DNA metabolic process
FBgn0000239	bur	GMP biosynthetic process, GMP biosynthetic process, histone deubiquitination, regulation of ubiquitin-specific protease activity, axon guidance	WBGene00010912	gmps-1	purine nucleotide biosynthetic process, GMP biosynthetic process, GMP biosynthetic process
FBgn0024945	NitFhit	nucleobase-containing compound metabolic process	WBGene00003594	nft-1	nitrogen compound metabolic process
FBgn0041186	Slbp	histone mRNA metabolic process, histone mRNA 3'-end processing, cell cycle, histone mRNA 3'-end processing, cell cycle, histone mRNA 3'-end processing, histone mRNA 3'-end processing, histone mRNA 3'-end processing, histone mRNA 3'-end processing, histone mRNA 3'-end processing	WBGene00000411	cdl-1	embryo development ending in birth or egg hatching, positive regulation of growth rate, morphogenesis of an epithelium, embryo development ending in birth or egg hatching, body morphogenesis, embryo development ending in birth or egg hatching, reproduction, hermaphrodite genitalia development, embryo development ending in birth or egg hatching, RNA interference, pharynx development, reproduction,…
FBgn0021761	Nup154	nucleocytoplasmic transport	WBGene00003794	npp-8	nucleocytoplasmic transport, embryo development ending in birth or egg hatching, embryo development ending in birth or egg hatching, hermaphrodite genitalia development, embryo development ending in birth or egg hatching, hermaphrodite genitalia development, embryo development ending in birth or egg hatching, embryo development ending in birth or egg hatching, embryo development ending in birth o…
FBgn0030142			WBGene00015697	C10H11.8	positive regulation of growth rate, growth, nematode larval development, positive regulation of growth rate, cell migration, positive regulation of multicellular organism growth, lipid storage, TOR signaling cascade
FBgn0039153	CG5463	glutaminyl-tRNA aminoacylation	WBGene00016524	C39B5.6
FBgn0011704	RnrS	DNA replication, oxidation-reduction process, deoxyribonucleoside diphosphate metabolic process, activation of caspase activity, neurogenesis	WBGene00004392	rnr-2	deoxyribonucleoside diphosphate metabolic process, oxidation-reduction process, oxidation-reduction process, oxidation-reduction process, embryo development ending in birth or egg hatching, embryo development ending in birth or egg hatching, morphogenesis of an epithelium, embryo development ending in birth or egg hatching, determination of adult lifespan, hermaphrodite genitalia development, emb…
FBgn0035424	CG11505	biological_process	WBGene00004147	larp-5
FBgn0032224	Sps2	selenocysteine biosynthetic process	WBGene00012867	seld-1
FBgn0002284	Pros26	ubiquitin-dependent protein catabolic process, proteolysis, proteasomal ubiquitin-dependent protein catabolic process, proteolysis involved in cellular protein catabolic process	WBGene00003952	pbs-6	proteolysis involved in cellular protein catabolic process, embryo development ending in birth or egg hatching, embryo development ending in birth or egg hatching, oviposition, locomotion, reproduction, embryo development ending in birth or egg hatching, growth, nematode larval development, locomotion, nematode larval development, body morphogenesis, embryo development ending in birth or egg hatc…
FBgn0001179	hay	adult locomotory behavior, response to UV, nucleotide-excision repair, nucleotide-excision repair, transcriptional open complex formation at RNA polymerase II promoter, promoter clearance from RNA polymerase II promoter, transcription initiation from RNA polymerase II promoter, transcription initiation from RNA polymerase II promoter, regulation of alternative nuclear mRNA splicing, via spliceoso…	WBGene00013441	Y66D12A.15	nucleotide-excision repair, embryo development ending in birth or egg hatching, embryo development ending in birth or egg hatching
FBgn0024920	Ts	deoxyribonucleotide biosynthetic process, dTMP biosynthetic process, neurogenesis	WBGene00022455	Y110A7A.4	dTMP biosynthetic process, embryo development ending in birth or egg hatching, body morphogenesis, embryo development ending in birth or egg hatching, embryo development ending in birth or egg hatching, embryo development ending in birth or egg hatching, embryo development ending in birth or egg hatching, embryo development ending in birth or egg hatching, embryo development ending in birth or eg…
FBgn0015546	spel1	mismatch repair, maintenance of DNA repeat elements, mismatch repair, maintenance of DNA repeat elements, mismatch repair, maintenance of DNA repeat elements, mismatch repair, postreplication repair, meiotic gene conversion, intra-S DNA damage checkpoint, DNA damage response, signal transduction by p53 class mediator resulting in induction of apoptosis, double-strand break repair, postreplication…	WBGene00003418	msh-2	mismatch repair, mismatch repair, mismatch repair, mismatch repair, mismatch repair, response to DNA damage stimulus, response to DNA damage stimulus, reproduction, maintenance of DNA repeat elements, maintenance of DNA repeat elements, DNA damage response, signal transduction by p53 class mediator resulting in induction of apoptosis, maintenance of DNA repeat elements, maintenance of DNA repeat …
FBgn0023522	CG11596	biological_process	WBGene00013015	Y48E1C.2
FBgn0029818	CG3033	attachment of GPI anchor to protein	WBGene00018006	hpo-3
FBgn0034908	CG5543	neurogenesis	WBGene00001513	gad-1	embryo development ending in birth or egg hatching, embryo development ending in birth or egg hatching, embryo development ending in birth or egg hatching, embryo development ending in birth or egg hatching, embryo development ending in birth or egg hatching, embryo development ending in birth or egg hatching, cell migration involved in gastrulation, establishment of mitotic spindle orientation, …
FBgn0033891	CG8067	metabolic process	WBGene00010721	K09E4.3
FBgn0030581	CG14408		WBGene00007270	C03C10.4
FBgn0260049	flr	actin filament depolymerization, actin polymerization or depolymerization, phagocytosis, engulfment, actin filament depolymerization, imaginal disc-derived wing hair organization, sarcomere organization	WBGene00010685	aipl-1	reproduction, actin filament organization, regulation of protein localization
FBgn0039639	CG14512	lipid glycosylation	WBGene00011193	hpo-17	carbohydrate metabolic process, lipid glycosylation
FBgn0067102	GlcT-1	negative regulation of apoptosis	WBGene00019127	cgt-3
FBgn0002673	twe	embryo development, cellularization, pole cell formation, male meiosis, regulation of syncytial blastoderm mitotic cell cycle, protein dephosphorylation, protein dephosphorylation, spindle assembly involved in male meiosis, spindle assembly involved in female meiosis, meiotic G2/MI transition, spermatogenesis, spermatogenesis, protein dephosphorylation, meiotic G2/MI transition, protein dephospho…	WBGene00000386	cdc-25.1	M phase of mitotic cell cycle, protein dephosphorylation, reproduction, embryo development ending in birth or egg hatching, embryo development ending in birth or egg hatching, embryo development ending in birth or egg hatching, reproduction, embryo development ending in birth or egg hatching, embryo development ending in birth or egg hatching, embryo development ending in birth or egg hatching, m…
FBgn0003525	stg	G2/M transition of mitotic cell cycle, G2/M transition of mitotic cell cycle, protein dephosphorylation, gastrulation, mesoderm development, centriole replication, regulation of mitosis, open tracheal system development, gastrulation, peripheral nervous system development, protein dephosphorylation, regulation of mitotic cell cycle, G2/M transition of mitotic cell cycle, G2/M transition of mitoti…	WBGene00000386	cdc-25.1	M phase of mitotic cell cycle, protein dephosphorylation, reproduction, embryo development ending in birth or egg hatching, embryo development ending in birth or egg hatching, embryo development ending in birth or egg hatching, reproduction, embryo development ending in birth or egg hatching, embryo development ending in birth or egg hatching, embryo development ending in birth or egg hatching, m…
FBgn0051852	Tap42	regulation of signal transduction, neurogenesis	WBGene00022193	ppfr-4	regulation of signal transduction, oviposition, morphogenesis of an epithelium, body morphogenesis, embryo development ending in birth or egg hatching, reproduction, hermaphrodite genitalia development, embryo development ending in birth or egg hatching, reproduction, hermaphrodite genitalia development, reproduction, hermaphrodite genitalia development, reproduction, hermaphrodite genitalia deve…
FBgn0041775	tral	ER to Golgi vesicle-mediated transport, oocyte dorsal/ventral axis specification, actin cytoskeleton organization, microtubule cytoskeleton organization	WBGene00012484	car-1	embryo development ending in birth or egg hatching, cytokinesis, embryo development ending in birth or egg hatching, embryo development ending in birth or egg hatching, positive regulation of locomotion, reproduction, embryo development ending in birth or egg hatching, embryo development ending in birth or egg hatching, cell death, cytokinesis, oocyte development, mitotic spindle organization
FBgn0031459	CG2862		WBGene00009002	hint-1
FBgn0037647	RagA	positive regulation of cell growth, regulation of autophagy, positive regulation of TOR signaling cascade, cellular response to starvation	WBGene00006414	raga-1	determination of adult lifespan, multicellular organism reproduction, positive regulation of TOR signaling cascade, determination of adult lifespan, positive regulation of multicellular organism growth, determination of adult lifespan, determination of adult lifespan, determination of adult lifespan
FBgn0005777	PpD3	protein dephosphorylation, protein dephosphorylation, protein dephosphorylation, mitotic cell cycle	WBGene00012665	pph-5	protein dephosphorylation, embryo development ending in birth or egg hatching, embryo development ending in birth or egg hatching, embryo development ending in birth or egg hatching, embryo development ending in birth or egg hatching, protein localization to organelle, negative regulation of exocytosis
FBgn0032030	Wdr82	microtubule severing, histone H3-K4 methylation, histone H3-K4 trimethylation, histone H3-K4 methylation	WBGene00016373	swd-2.1
FBgn0015737	Hmu	biosynthetic process	WBGene00010197	F57C2.5	biosynthetic process
FBgn0035111	CG16940		WBGene00018612	F48E8.6
FBgn0035831	CG8038	rRNA processing, mRNA cleavage, tRNA processing	WBGene00007603	C15C6.4	rRNA processing, rRNA processing, mRNA cleavage, mRNA cleavage, tRNA processing, tRNA processing, positive regulation of growth rate, positive regulation of growth rate, positive regulation of growth rate, hermaphrodite genitalia development, reproduction
FBgn0040230	dbo	regulation of synapse organization, cell growth, neuron projection morphogenesis	WBGene00020030	R12E2.1
FBgn0037526	CG10092	arginyl-tRNA aminoacylation	WBGene00004680	rars-2	arginyl-tRNA aminoacylation, arginyl-tRNA aminoacylation, arginyl-tRNA aminoacylation, tRNA aminoacylation for protein translation, positive regulation of growth rate, positive regulation of growth rate, embryo development ending in birth or egg hatching, reproduction
FBgn0023506	Es2	nervous system development, nuclear mRNA splicing, via spliceosome	WBGene00018371	ess-2	meiosis, meiotic chromosome segregation, embryo development ending in birth or egg hatching, embryo development ending in birth or egg hatching, embryo development ending in birth or egg hatching
FBgn0028685	Rpt4	proteolysis, proteolysis, proteolysis, proteasomal ubiquitin-dependent protein catabolic process, protein catabolic process, neurogenesis	WBGene00004504	rpt-4	protein catabolic process, positive regulation of growth rate, embryo development ending in birth or egg hatching, body morphogenesis, locomotion, reproduction, embryo development ending in birth or egg hatching, embryo development ending in birth or egg hatching, reproduction, nematode larval development, embryo development ending in birth or egg hatching, determination of adult lifespan, determ…
FBgn0032014	CG7840	lipid metabolic process	WBGene00007102	B0024.13	lipid metabolic process
FBgn0038827	Fancd2	intra-S DNA damage checkpoint, DNA repair	WBGene00012767	fcd-2	embryo development ending in birth or egg hatching, embryo development ending in birth or egg hatching, fertilization, nucleotide-excision repair, regulation of DNA-dependent DNA replication
FBgn0034231	Apc10	mitotic anaphase, regulation of mitotic metaphase/anaphase transition, anaphase-promoting complex-dependent proteasomal ubiquitin-dependent protein catabolic process, endomitotic cell cycle, mitosis, neurogenesis	WBGene00000144	apc-10	embryo development ending in birth or egg hatching, reproduction, growth, nematode larval development, locomotion
FBgn0031600	CG3652		WBGene00012208	W02D9.2	embryo development ending in birth or egg hatching
FBgn0087040	alphaTub67C	embryo development ending in birth or egg hatching, nuclear division, female pronucleus assembly, embryo development, central nervous system development, sperm aster formation, peripheral nervous system development, embryonic cleavage, pronuclear migration, microtubule-based process, protein polymerization, GTP catabolic process, mitotic spindle organization, mitotic spindle organization, centros…	WBGene00006529	tba-2	microtubule-based process, protein polymerization, protein polymerization, protein polymerization, GTP catabolic process, GTP catabolic process, embryo development ending in birth or egg hatching, mitotic spindle organization, embryo development ending in birth or egg hatching, embryo development ending in birth or egg hatching, nematode larval development, growth, nematode larval development, em…
FBgn0087040	alphaTub67C	embryo development ending in birth or egg hatching, nuclear division, female pronucleus assembly, embryo development, central nervous system development, sperm aster formation, peripheral nervous system development, embryonic cleavage, pronuclear migration, microtubule-based process, protein polymerization, GTP catabolic process, mitotic spindle organization, mitotic spindle organization, centros…	WBGene00006528	tba-1	microtubule-based process, protein polymerization, protein polymerization, protein polymerization, GTP catabolic process, GTP catabolic process, embryo development ending in birth or egg hatching, mitotic spindle organization, embryo development ending in birth or egg hatching, embryo development ending in birth or egg hatching, growth, nematode larval development, reproduction, pronuclear migrat…
FBgn0032204	CG4953	biological_process	WBGene00016964	C56C10.7
FBgn0035944	CG5021	biological_process	WBGene00016400	C34D4.4
FBgn0030039	CG12123		WBGene00010229	F58A4.6	embryo development ending in birth or egg hatching, embryo development ending in birth or egg hatching
FBgn0011289	TfIIA-L	positive regulation of transcription from RNA polymerase II promoter, transcription initiation from RNA polymerase II promoter, transcription initiation from RNA polymerase II promoter, transcription initiation from RNA polymerase II promoter, regulation of transcription from RNA polymerase II promoter	WBGene00004136	pqn-51	transcription initiation from RNA polymerase II promoter, transcription initiation from RNA polymerase II promoter, transcription initiation from RNA polymerase II promoter, transcription initiation from RNA polymerase II promoter, embryo development ending in birth or egg hatching
FBgn0036184	PCID2		WBGene00016171	C27F2.10	embryo development ending in birth or egg hatching, growth, nematode larval development, body morphogenesis, reproduction, positive regulation of growth rate, embryo development ending in birth or egg hatching, body morphogenesis, embryo development ending in birth or egg hatching, body morphogenesis, body morphogenesis, locomotion, embryo development ending in birth or egg hatching, embryo devel…
FBgn0038046	CG5641	immune response, positive regulation of transcription, DNA-dependent, nuclear mRNA splicing, via spliceosome, positive regulation of transcription, DNA-dependent	WBGene00011253	R11H6.5	lipid storage
FBgn0029857	wuho	oogenesis, spermatogenesis	WBGene00022420	Y102E9.2
FBgn0033995	CG8090		WBGene00013551	Y75B8A.16
FBgn0032732	CG15168		WBGene00195248	B0334.15	positive regulation of growth rate
FBgn0040078	pont	positive regulation of gene expression, spindle assembly involved in mitosis, mitotic cell cycle G2/M transition DNA damage checkpoint	WBGene00007784	ruvb-1	positive regulation of growth rate, embryo development ending in birth or egg hatching, growth, nematode larval development, body morphogenesis, reproduction, positive regulation of growth rate, embryo development ending in birth or egg hatching, hermaphrodite genitalia development, embryo development ending in birth or egg hatching, growth, nematode larval development, embryo development ending …
FBgn0051961	CG31961	tubulin complex assembly, cell morphogenesis, neurogenesis	WBGene00044609	Y71H2AM.24	cell morphogenesis
FBgn0034803	CG9849	muscle cell fate determination	WBGene00020322	T07F12.2
FBgn0031312	Tango14	protein secretion, wing disc development	WBGene00009505	F37B12.3	locomotion, lipid storage, lipid storage, lipid storage, growth, nematode larval development, locomotion, embryo development ending in birth or egg hatching
FBgn0035713	CG10107	proteolysis, proteolysis, central nervous system projection neuron axonogenesis, dendritic spine morphogenesis, protein desumoylation, negative regulation of cell death, axon guidance	WBGene00006739	ulp-4	proteolysis, positive regulation of growth rate, body morphogenesis, oviposition, positive regulation of growth rate, embryo development ending in birth or egg hatching
FBgn0035713	CG10107	proteolysis, proteolysis, central nervous system projection neuron axonogenesis, dendritic spine morphogenesis, protein desumoylation, negative regulation of cell death, axon guidance	WBGene00006740	ulp-5	proteolysis
FBgn0030420	CG12717	proteolysis, imaginal disc-derived wing morphogenesis, central nervous system projection neuron axonogenesis, dendritic spine morphogenesis, protein desumoylation	WBGene00006739	ulp-4	proteolysis, positive regulation of growth rate, body morphogenesis, oviposition, positive regulation of growth rate, embryo development ending in birth or egg hatching
FBgn0030420	CG12717	proteolysis, imaginal disc-derived wing morphogenesis, central nervous system projection neuron axonogenesis, dendritic spine morphogenesis, protein desumoylation	WBGene00006740	ulp-5	proteolysis
FBgn0038039	CG5196	protein palmitoylation, Golgi organization	WBGene00010892	dhhc-6	reproduction, embryo development ending in birth or egg hatching, growth, nematode larval development, embryo development ending in birth or egg hatching, growth, nematode larval development
FBgn0034933	CG3735	neurogenesis	WBGene00012756	Y41C4A.9	positive regulation of growth rate, reproduction
FBgn0026175	skpC	ubiquitin-dependent protein catabolic process	WBGene00004808	skr-2	ubiquitin-dependent protein catabolic process, ubiquitin-dependent protein catabolic process, ubiquitin-dependent protein catabolic process, positive regulation of growth rate, embryo development ending in birth or egg hatching, locomotion, hermaphrodite genitalia development, embryo development ending in birth or egg hatching, oviposition, gonad development, embryo development ending in birth or…
FBgn0026175	skpC	ubiquitin-dependent protein catabolic process	WBGene00004823	skr-17	ubiquitin-dependent protein catabolic process, ubiquitin-dependent protein catabolic process, ubiquitin-dependent protein catabolic process, embryo development ending in birth or egg hatching, embryo development ending in birth or egg hatching, growth, nematode larval development, embryo development ending in birth or egg hatching, growth, reproduction, positive regulation of multicellular organi…
FBgn0064766	CG7600		WBGene00009366	F33H2.2	morphogenesis of an epithelium, oviposition, locomotion, locomotion
FBgn0027087	Aats-his	histidyl-tRNA aminoacylation, histidyl-tRNA aminoacylation	WBGene00002001	hars-1	histidyl-tRNA aminoacylation, positive regulation of growth rate, embryo development ending in birth or egg hatching, positive regulation of multicellular organism growth, reproduction, positive regulation of growth rate, embryo development ending in birth or egg hatching, growth, nematode larval development, embryo development ending in birth or egg hatching, receptor-mediated endocytosis, histi…
FBgn0260779	gatA	karyosome formation, oogenesis, translation	WBGene00021508	Y41D4A.6	lipid storage, lipid storage
FBgn0000182	BicC	ovarian follicle cell migration, oogenesis, negative regulation of oskar mRNA translation, oogenesis, oogenesis, negative regulation of oskar mRNA translation, negative regulation of oskar mRNA translation, mitosis, actin cytoskeleton organization, microtubule cytoskeleton organization	WBGene00001597	gld-3	embryo development ending in birth or egg hatching, reproduction, masculinization of hermaphroditic germ-line, regulation of cell proliferation, regulation of meiosis, regulation of cell proliferation, regulation of meiosis, germ cell development, regulation of cell proliferation, regulation of meiosis, regulation of cell proliferation, regulation of meiosis, germ cell development, germ cell deve…
FBgn0024994	Csat	UDP-galactose transport, UDP-N-acetylgalactosamine transport, UDP-galactose transport, CMP-N-acetylneuraminate transport, galactose transport	WBGene00014139	nstp-5	nucleotide-sugar transport, carbohydrate transport
FBgn0040336	Seipin	regulation of lipid biosynthetic process, regulation of lipid storage, phosphatidic acid metabolic process, response to starvation, regulation of lipid biosynthetic process, regulation of lipid biosynthetic process, regulation of triglyceride metabolic process, regulation of lipid biosynthetic process, diacylglycerol metabolic process	WBGene00019808	R01B10.6
FBgn0029911	CG14435		WBGene00022115	Y71F9AL.10
FBgn0030460	CG2453		WBGene00000765	coq-5	determination of adult lifespan, ubiquinone biosynthetic process
FBgn0034614	CG9752	biological_process	WBGene00015702	C11D2.4
FBgn0002924	ncd	distributive segregation, distributive segregation, meiotic spindle organization, mitotic centrosome separation, mitotic centrosome separation, chromosome segregation, microtubule-based movement, spindle assembly involved in female meiosis, spindle organization, mitotic spindle elongation, microtubule bundle formation, minus-end directed microtubule sliding, mitotic spindle organization, regulati…	WBGene00002226	klp-16	microtubule-based movement, embryo development ending in birth or egg hatching, meiosis, meiotic chromosome segregation, embryo development ending in birth or egg hatching, embryo development ending in birth or egg hatching, cell division, cytokinesis, meiotic chromosome segregation, embryo development ending in birth or egg hatching, embryo development ending in birth or egg hatching, embryo dev…
FBgn0002924	ncd	distributive segregation, distributive segregation, meiotic spindle organization, mitotic centrosome separation, mitotic centrosome separation, chromosome segregation, microtubule-based movement, spindle assembly involved in female meiosis, spindle organization, mitotic spindle elongation, microtubule bundle formation, minus-end directed microtubule sliding, mitotic spindle organization, regulati…	WBGene00002225	klp-15	microtubule-based movement, positive regulation of growth rate, embryo development ending in birth or egg hatching, meiosis, meiotic chromosome segregation, embryo development ending in birth or egg hatching, embryo development ending in birth or egg hatching, body morphogenesis, embryo development ending in birth or egg hatching, embryo development ending in birth or egg hatching, microtubule-ba…
FBgn0037482	CG10055	biological_process	WBGene00021655	Y48A5A.1
FBgn0261014	TER94	Golgi organization, regulation of pole plasm oskar mRNA localization, endoplasmic reticulum membrane fusion, microtubule cytoskeleton organization, endoplasmic reticulum organization, pole plasm oskar mRNA localization, oocyte microtubule cytoskeleton polarization, protein localization, rhabdomere development, positive regulation of proteasomal ubiquitin-dependent protein catabolic process, prote…	WBGene00008053	cdc-48.2	embryo development ending in birth or egg hatching, positive regulation of growth rate, locomotion, nematode larval development, embryo development ending in birth or egg hatching, embryo development ending in birth or egg hatching, cell division, cytokinesis, meiosis, endoplasmic reticulum unfolded protein response, embryo development ending in birth or egg hatching, embryo development ending in…
FBgn0261014	TER94	Golgi organization, regulation of pole plasm oskar mRNA localization, endoplasmic reticulum membrane fusion, microtubule cytoskeleton organization, endoplasmic reticulum organization, pole plasm oskar mRNA localization, oocyte microtubule cytoskeleton polarization, protein localization, rhabdomere development, positive regulation of proteasomal ubiquitin-dependent protein catabolic process, prote…	WBGene00007352	cdc-48.1	embryo development ending in birth or egg hatching, collagen and cuticulin-based cuticle development, nematode larval development, embryo development ending in birth or egg hatching, positive regulation of multicellular organism growth, locomotion, reproduction, embryo development ending in birth or egg hatching, cell division, cytokinesis, meiosis, embryo development ending in birth or egg hatch…
FBgn0015402	ksr	Ras protein signal transduction, anterior/posterior axis specification, embryo, torso signaling pathway, protein phosphorylation, protein phosphorylation, tracheal outgrowth, open tracheal system, signal transduction, imaginal disc-derived wing morphogenesis	WBGene00002240	ksr-2	protein phosphorylation, nematode larval development, vulval development, tail tip morphogenesis, meiotic cell cycle, Ras protein signal transduction, protein phosphorylation
FBgn0031456	Trn-SR	mRNA export from nucleus, protein import into nucleus, splicing factor protein import into nucleus, protein import into nucleus, regulation of nuclear mRNA splicing, via spliceosome, splicing factor protein import into nucleus, splicing factor protein import into nucleus, splicing factor protein import into nucleus, regulation of nuclear mRNA splicing, via spliceosome, splicing factor protein imp…	WBGene00006647	tsr-1	embryo development ending in birth or egg hatching, embryo development ending in birth or egg hatching, embryo development ending in birth or egg hatching, embryo development ending in birth or egg hatching
FBgn0039936	CG11148	biological_process	WBGene00016002	C18H9.3
FBgn0028507	CG3793	methylation	WBGene00007137	B0285.4	methylation
FBgn0038649	CG7718	phospholipid biosynthetic process	WBGene00021677	pgs-1	metabolic process, phospholipid biosynthetic process, embryo development ending in birth or egg hatching, reproduction, regulation of mitochondrial membrane potential, regulation of cell proliferation, phosphatidylglycerol biosynthetic process
FBgn0030365	Tango4	protein secretion, Golgi organization, nuclear mRNA splicing, via spliceosome	WBGene00006481	plrg-1	embryo development ending in birth or egg hatching, reproduction, embryo development ending in birth or egg hatching, nematode larval development, growth, nematode larval development, embryo development ending in birth or egg hatching, molting cycle, collagen and cuticulin-based cuticle, locomotion, reproduction, embryo development ending in birth or egg hatching, embryo development ending in bir…
FBgn0260985	RfC4	mitotic chromosome condensation, sister chromatid segregation, DNA repair, DNA replication, DNA strand elongation involved in DNA replication, DNA replication, DNA replication, DNA replication, female meiosis chromosome segregation, mitotic chromosome condensation, mitosis, DNA damage checkpoint, DNA replication checkpoint, DNA strand elongation involved in DNA replication, neurogenesis, lateral …	WBGene00004338	rfc-2	DNA replication, embryo development ending in birth or egg hatching, embryo development ending in birth or egg hatching, locomotion, reproduction, embryo development ending in birth or egg hatching
FBgn0037236	Skp2	ubiquitin-dependent protein catabolic process, mitotic cell cycle, endomitotic cell cycle	WBGene00018613	skpt-1
FBgn0058045	CG40045		WBGene00006704	ubc-7
FBgn0033846	mip120	eggshell chorion gene amplification, negative regulation of transcription from RNA polymerase II promoter, negative regulation of transcription from RNA polymerase II promoter, oogenesis, sperm motility, determination of adult lifespan	WBGene00003037	lin-54	positive regulation of growth rate, positive regulation of growth rate, hermaphrodite genitalia development, hermaphrodite genitalia development, embryo development ending in birth or egg hatching, negative regulation of vulval development, negative regulation of vulval development, negative regulation of vulval development, receptor-mediated endocytosis, regulation of transcription from RNA poly…
FBgn0033491	CG18011		WBGene00021689	Y48G8AL.10
FBgn0015270	Orc2	DNA-dependent DNA replication, DNA replication, DNA-dependent DNA replication initiation, DNA-dependent DNA replication, chromatin silencing, DNA-dependent DNA replication, DNA replication, eggshell chorion gene amplification, DNA replication, mitotic spindle organization, mitotic chromosome condensation, chromosome condensation, DNA replication, eggshell chorion gene amplification, DNA replicati…	WBGene00003882	orc-2	DNA replication, embryo development ending in birth or egg hatching, positive regulation of multicellular organism growth, hermaphrodite genitalia development, negative regulation of vulval development, locomotion, positive regulation of growth rate, locomotion, positive regulation of locomotion, hermaphrodite genitalia development, reproduction, body morphogenesis, hermaphrodite genitalia develo…
FBgn0038609	Nup43	mitosis	WBGene00007493	npp-23
FBgn0035489			WBGene00010420	H28O16.2
FBgn0035998	CG3437		WBGene00006466	tag-115
FBgn0033994	CG7544	methylation	WBGene00014228	mett-10	centrosome cycle, embryo development, vulval development
FBgn0019949	Cdk9	transcription elongation from RNA polymerase II promoter, response to heat, transcription, DNA-dependent, protein phosphorylation, cell adhesion, regulation of cell shape, cell cycle, protein phosphorylation, neurogenesis	WBGene00000410	cdk-9	protein phosphorylation, protein phosphorylation, embryo development ending in birth or egg hatching, embryo development ending in birth or egg hatching, growth, nematode larval development, locomotion, positive regulation of growth rate, embryo development ending in birth or egg hatching, locomotion, embryo development ending in birth or egg hatching, embryo development ending in birth or egg ha…
FBgn0032120	CG33298	phospholipid transport, cation transport, intracellular protein transport, Golgi organization	WBGene00020784	tat-4	cation transport, phospholipid transport, growth, nematode larval development, reproduction, hermaphrodite genitalia development, positive regulation of multicellular organism growth, reproduction, hermaphrodite genitalia development, reproduction, growth, nematode larval development, reproduction, positive regulation of multicellular organism growth, reproduction, positive regulation of multicel…
FBgn0036850	Gem2	spliceosome assembly	WBGene00004886	smi-1	spliceosome assembly, nuclear mRNA splicing, via spliceosome, embryo development ending in birth or egg hatching
FBgn0034360	CG10927		WBGene00012927	Y47D3A.14
FBgn0037958	CG6962		WBGene00011037	R05D11.9	embryo development ending in birth or egg hatching
FBgn0010303	hep	dorsal closure, spreading of leading edge cells, JNK cascade, dorsal closure, dorsal closure, JNK cascade, protein phosphorylation, regulation of transcription from RNA polymerase II promoter, dorsal closure, ovarian follicle cell development, MAPKKK cascade, protein phosphorylation, imaginal disc fusion, thorax closure, chorion-containing eggshell pattern formation, micropyle formation, dorsal a…	WBGene00003185	mek-1	protein phosphorylation, response to copper ion, response to copper ion, response to cadmium ion, response to cadmium ion, response to starvation, response to starvation, activation of JUN kinase activity, response to starvation, response to starvation, MAPKKK cascade, MAPKKK cascade, regulation of growth rate, activation of MAPK activity, activation of MAPK activity, response to temperature stim…
FBgn0033844	bbc	phospholipid biosynthetic process	WBGene00013024	Y49A3A.1	phospholipid biosynthetic process, negative regulation of multicellular organism growth, embryo development ending in birth or egg hatching, lipid storage, lipid storage, embryo development ending in birth or egg hatching
FBgn0010590	Prosbeta1	proteasomal ubiquitin-dependent protein catabolic process, proteolysis involved in cellular protein catabolic process, response to DNA damage stimulus	WBGene00003947	pbs-1	proteolysis involved in cellular protein catabolic process, proteolysis involved in cellular protein catabolic process, reproduction, embryo development ending in birth or egg hatching, embryo development ending in birth or egg hatching, growth, nematode larval development, locomotion, embryo development ending in birth or egg hatching, apoptosis, reproduction
FBgn0033380	Phax	nervous system development, snRNA export from nucleus	WBGene00022192	Y71H2B.2	embryo development ending in birth or egg hatching
FBgn0002441	l(3)mbt	regulation of preblastoderm mitotic cell cycle, syncytial nuclear migration, negative regulation of transcription from RNA polymerase II promoter, neuroblast proliferation, dendrite morphogenesis, muscle organ development, negative regulation of gene expression, negative regulation of cell proliferation	WBGene00021661	mbtr-1	regulation of transcription, DNA-dependent
FBgn0031310	CG4764		WBGene00014234	vps-29
FBgn0032698	CG10336	response to DNA damage stimulus, replication fork protection, cell cycle	WBGene00017738	F23C8.9	response to DNA damage stimulus, cell cycle, replication fork protection
FBgn0037652	CG11980	biological_process	WBGene00007787	C27H6.8
FBgn0022213	Cas	apoptosis, protein import into nucleus, protein export from nucleus, protein export from nucleus, phagocytosis, engulfment, positive regulation of NFAT protein import into nucleus, neurogenesis	WBGene00002079	xpo-2	intracellular protein transport, intracellular protein transport, embryo development ending in birth or egg hatching, embryo development ending in birth or egg hatching, hermaphrodite genitalia development, embryo development ending in birth or egg hatching, locomotion, reproduction, embryo development ending in birth or egg hatching, positive regulation of growth rate, embryo development ending …
FBgn0030790	CG4768		WBGene00016741	C48B6.3
FBgn0037202	Ssl1	promoter clearance from RNA polymerase II promoter, transcription initiation from RNA polymerase II promoter, transcription initiation from RNA polymerase II promoter, nucleotide-excision repair, transcriptional open complex formation at RNA polymerase II promoter, transcription from RNA polymerase II promoter	WBGene00011814	T16H12.4	DNA repair, nucleotide-excision repair, transcription, DNA-dependent, embryo development ending in birth or egg hatching, embryo development ending in birth or egg hatching, nematode larval development, body morphogenesis, locomotion, positive regulation of growth rate, embryo development ending in birth or egg hatching, locomotion, embryo development ending in birth or egg hatching
FBgn0032042	CG13398		WBGene00018819	rog-1	reproduction, embryo development ending in birth or egg hatching, embryo development ending in birth or egg hatching, embryo development ending in birth or egg hatching, reproduction, apoptosis, reproduction
FBgn0031782	WDR79		WBGene00013669	Y105E8A.8
FBgn0039790	CG2246	nucleotide biosynthetic process	WBGene00012258	W04G3.5	nucleotide biosynthetic process
FBgn0036397	CG8783	biological_process	WBGene00018072	nprl-3	morphogenesis of an epithelium
FBgn0024921	Trn	protein import into nucleus, phagocytosis, engulfment, neurogenesis	WBGene00002076	imb-2	intracellular protein transport, positive regulation of growth rate, embryo development ending in birth or egg hatching, nematode larval development, body morphogenesis, positive regulation of growth rate, embryo development ending in birth or egg hatching, locomotion, embryo development ending in birth or egg hatching, growth, nematode larval development, reproduction, embryo development ending …
FBgn0003139	PpV	protein dephosphorylation, G1/S transition of mitotic cell cycle, protein dephosphorylation, mitotic cell cycle	WBGene00007922	pph-6	mitosis, establishment of mitotic spindle localization, first cell cycle pseudocleavage, cortical actin cytoskeleton organization
FBgn0033698	CG8858	biological_process	WBGene00010364	H04D03.3
FBgn0035106	rno	regulation of transcription, DNA-dependent, negative regulation of epidermal growth factor receptor signaling pathway, negative regulation of epidermal growth factor receptor signaling pathway, compound eye photoreceptor development	WBGene00021810	phf-15	negative regulation of vulval development, negative regulation of vulval development, negative regulation of vulval development, nematode larval development
FBgn0030055	CG12772		WBGene00013235	Y56A3A.16
FBgn0023536	CG3156	heme biosynthetic process, mitochondrial transport, transmembrane transport	WBGene00001813	haf-3	transport, transport, transmembrane transport, transmembrane transport
FBgn0035194	Psf1	neurogenesis, lateral inhibition	WBGene00011275	R53.6	embryo development ending in birth or egg hatching, nematode larval development, body morphogenesis, locomotion, embryo development ending in birth or egg hatching, hermaphrodite genitalia development, embryo development ending in birth or egg hatching, inductive cell migration
FBgn0052318	CG32318	microtubule-based movement	WBGene00011275	R53.6	embryo development ending in birth or egg hatching, nematode larval development, body morphogenesis, locomotion, embryo development ending in birth or egg hatching, hermaphrodite genitalia development, embryo development ending in birth or egg hatching, inductive cell migration
FBgn0034646	Rae1	regulation of G1/S transition of mitotic cell cycle, mRNA export from nucleus, centrosome organization, regulation of cell cycle, negative regulation of synaptic growth at neuromuscular junction, regulation of autophagy	WBGene00003803	rae-1	negative regulation of locomotion, hermaphrodite genitalia development, reproduction, positive regulation of growth rate, morphogenesis of an epithelium, locomotion, hermaphrodite genitalia development, reproduction, positive regulation of growth rate, morphogenesis of an epithelium, hermaphrodite genitalia development, reproduction, hermaphrodite genitalia development, embryo development ending …
FBgn0050290	Ppcdc	coenzyme A biosynthetic process	WBGene00009138	F25H9.6	reproduction, positive regulation of growth rate, reproduction, positive regulation of growth rate, reproduction, growth, nematode larval development, receptor-mediated endocytosis
FBgn0005198	gig	oogenesis, regulation of cell cycle, regulation of cell cycle, negative regulation of cell growth, negative regulation of cell growth, negative regulation of cell proliferation, negative regulation of insulin receptor signaling pathway, negative regulation of cell size, negative regulation of organ growth, negative regulation of cell growth, negative regulation of cell proliferation, response to …	WBGene00021209	Y18H1A.3	regulation of small GTPase mediated signal transduction
FBgn0039466	CG5521	regulation of small GTPase mediated signal transduction, positive regulation of GTPase activity	WBGene00021209	Y18H1A.3	regulation of small GTPase mediated signal transduction
FBgn0260398	Pbp49	snRNA transcription from RNA polymerase II promoter, snRNA transcription from RNA polymerase III promoter, snRNA transcription from RNA polymerase II promoter, protein-DNA complex assembly, snRNA transcription from RNA polymerase III promoter, protein-DNA complex assembly	WBGene00015098	B0273.3	reproduction
FBgn0260398	Pbp49	snRNA transcription from RNA polymerase II promoter, snRNA transcription from RNA polymerase III promoter, snRNA transcription from RNA polymerase II promoter, protein-DNA complex assembly, snRNA transcription from RNA polymerase III promoter, protein-DNA complex assembly	WBGene00021667	Y48G1BM.1	reproduction
FBgn0029999	CG1575		WBGene00012977	Y48A6C.4	growth, nematode larval development, positive regulation of growth rate, growth, nematode larval development, receptor-mediated endocytosis
FBgn0037549	CG7878		WBGene00013214	Y54G11A.3
FBgn0250843	Pros35	proteolysis, ubiquitin-dependent protein catabolic process, proteasomal ubiquitin-dependent protein catabolic process, ubiquitin-dependent protein catabolic process	WBGene00003927	pas-6	ubiquitin-dependent protein catabolic process, proteolysis involved in cellular protein catabolic process, embryo development ending in birth or egg hatching, reproduction, reproduction, embryo development ending in birth or egg hatching, nematode larval development, growth, nematode larval development, locomotion, embryo development ending in birth or egg hatching, molting cycle, collagen and cu…
FBgn0039846	CG11337	mRNA catabolic process, RNA processing	WBGene00015266	BE0003N10.1	mRNA catabolic process, RNA processing
FBgn0031452	Cwc25	mitotic spindle organization	WBGene00003391	mog-3	positive regulation of embryonic development, embryo development ending in birth or egg hatching, embryo development ending in birth or egg hatching, body morphogenesis, feminization of hermaphroditic germ-line, meiotic prophase I
FBgn0040011	CG17494		WBGene00019766	M4.1
FBgn0051759	CG31759		WBGene00011268	R17.2
FBgn0015019	Cctgamma	protein folding, protein folding, protein folding, mitotic spindle organization, trachea morphogenesis, terminal branching, open tracheal system	WBGene00018782	cct-3	cellular protein metabolic process, protein folding, embryo development ending in birth or egg hatching, reproduction, embryo development ending in birth or egg hatching, growth, nematode larval development, embryo development ending in birth or egg hatching, microtubule polymerization
FBgn0026402	NiPp1	negative regulation of protein dephosphorylation, axon guidance	WBGene00015233	B0511.7
FBgn0030026	sni	metabolic process	WBGene00000975	dhs-12	metabolic process
FBgn0250746	Prosbeta7	proteolysis, ubiquitin-dependent protein catabolic process, proteasomal ubiquitin-dependent protein catabolic process, proteolysis involved in cellular protein catabolic process, cellular process, mitotic spindle elongation, cell proliferation, mitotic spindle organization, centrosome organization, response to DNA damage stimulus, neurogenesis	WBGene00003953	pbs-7	proteolysis involved in cellular protein catabolic process, embryo development ending in birth or egg hatching, locomotion, embryo development ending in birth or egg hatching, reproduction, embryo development ending in birth or egg hatching, growth, nematode larval development, locomotion, reproduction, embryo development ending in birth or egg hatching, growth, nematode larval development, locom…
FBgn0035945	CG5026	dephosphorylation	WBGene00003479	mtm-9	dephosphorylation, endocytosis, endocytosis, regulation of cell migration
FBgn0046692	Stlk	protein phosphorylation, protein phosphorylation	WBGene00013132	strd-1	protein phosphorylation, embryo development ending in birth or egg hatching, maintenance of dauer, establishment or maintenance of cell polarity, synapse organization, protein localization to synapse, positive regulation of peptidyl-threonine phosphorylation, asymmetric neuroblast division, asymmetric neuroblast division, asymmetric neuroblast division
FBgn0004598	Fur2	proteolysis, protein phosphorylation, proteolysis, transmembrane receptor protein tyrosine kinase signaling pathway, protein processing	WBGene00000254	bli-4	proteolysis, proteolysis, growth, nematode larval development, nematode larval development, body morphogenesis, molting cycle, collagen and cuticulin-based cuticle, embryo development ending in birth or egg hatching, nematode larval development, growth, nematode larval development, body morphogenesis, molting cycle, collagen and cuticulin-based cuticle, locomotion, embryo development ending in bi…
FBgn0036819	dysb	regulation of synaptic plasticity, long-term memory, negative regulation of dopamine metabolic process, mating behavior, sex discrimination, negative regulation of dopamine metabolic process, positive regulation of synaptic transmission, glutamatergic, adult locomotory behavior, short-term memory	WBGene00013697	dsbn-1
FBgn0030289	CG1597	oligosaccharide metabolic process	WBGene00008775	F13H10.4	oligosaccharide metabolic process, positive regulation of growth rate, locomotion, positive regulation of growth rate, locomotion
FBgn0020369	Pros45	ubiquitin-dependent protein catabolic process, proteolysis, proteolysis, proteolysis, proteolysis, proteasomal ubiquitin-dependent protein catabolic process, protein catabolic process, response to DNA damage stimulus	WBGene00018991	F56F11.4	protein catabolic process, embryo development ending in birth or egg hatching, nematode larval development, growth, nematode larval development, reproduction, hermaphrodite genitalia development, embryo development ending in birth or egg hatching, growth, nematode larval development, embryo development ending in birth or egg hatching, growth, nematode larval development, growth, nematode larval d…
FBgn0020369	Pros45	ubiquitin-dependent protein catabolic process, proteolysis, proteolysis, proteolysis, proteolysis, proteasomal ubiquitin-dependent protein catabolic process, protein catabolic process, response to DNA damage stimulus	WBGene00004506	rpt-6	protein catabolic process, embryo development ending in birth or egg hatching, embryo development ending in birth or egg hatching, embryo development ending in birth or egg hatching, positive regulation of growth rate, embryo development ending in birth or egg hatching, positive regulation of growth rate, embryo development ending in birth or egg hatching, growth, nematode larval development, loc…
FBgn0033526	Caf1-105	chromatin assembly or disassembly, nucleosome assembly	WBGene00022141	chaf-2	embryo development ending in birth or egg hatching, reproduction, embryo development ending in birth or egg hatching
FBgn0020255	ran	cell cycle, regulation of cell shape, cell adhesion, actin filament organization, GTP catabolic process, nucleocytoplasmic transport, intracellular protein transport, small GTPase mediated signal transduction, neuron projection morphogenesis, meiotic spindle organization	WBGene00004302	ran-1	small GTPase mediated signal transduction, GTP catabolic process, intracellular protein transport, nucleocytoplasmic transport, signal transduction, embryo development ending in birth or egg hatching, embryo development ending in birth or egg hatching, embryo development ending in birth or egg hatching, reproduction, nematode larval development, locomotion, reproduction, embryo development ending…
FBgn0034447	CG7744		WBGene00011994	T24F1.2	reproduction
FBgn0005322	nmd	spermatid development, wing disc dorsal/ventral pattern formation	WBGene00010557	mspn-1	growth, nematode larval development, body morphogenesis
FBgn0023520	CG3857		WBGene00013188	smg-9
FBgn0030512	CG9940	NAD biosynthetic process, NAD biosynthetic process	WBGene00007698	qns-1	nitrogen compound metabolic process, NAD biosynthetic process, NAD biosynthetic process
FBgn0086445	l(2)37Cd	phagocytosis, engulfment	WBGene00011368	tftc-5	negative regulation of vulval development, negative regulation of vulval development, RNA interference
FBgn0033272	RagC	positive regulation of TOR signaling cascade, cellular response to amino acid stimulus	WBGene00012497	ragc-1	embryo development ending in birth or egg hatching
FBgn0020443	Elf	translational termination, translational termination, translational termination, translational termination, translational termination	WBGene00010405	erfa-3	positive regulation of growth rate, embryo development ending in birth or egg hatching, reproduction, embryo development ending in birth or egg hatching, growth, nematode larval development, locomotion, positive regulation of multicellular organism growth, reproduction, embryo development ending in birth or egg hatching, receptor-mediated endocytosis, growth, nematode larval development, positive…
FBgn0024352	Hop	protein folding	WBGene00019983	sti-1	reproduction, gonad development, response to heat, reproduction, determination of adult lifespan, response to heat, response to heat, negative regulation of ATPase activity
FBgn0027780	U26	fatty acid metabolic process	WBGene00012356	W09D6.1	metabolic process
FBgn0028693	Rpn12	proteolysis, proteolysis, proteolysis, proteasomal ubiquitin-dependent protein catabolic process, cellular process, cell proliferation, mitotic spindle organization, mitotic spindle elongation, neurogenesis, ubiquitin-dependent protein catabolic process	WBGene00004468	rpn-12	proteolysis, determination of adult lifespan, negative regulation of vulval development, negative regulation of vulval development, negative regulation of vulval development, RNA interference
FBgn0029958	Pdp	protein dephosphorylation, pyruvate metabolic process, protein dephosphorylation	WBGene00022832	pdp-1
FBgn0036356	CG10222	neurogenesis	WBGene00015029	B0207.6	embryo development ending in birth or egg hatching, oviposition, reproduction, positive regulation of growth rate, morphogenesis of an epithelium, locomotion, hermaphrodite genitalia development, reproduction, morphogenesis of an epithelium, hermaphrodite genitalia development, reproduction, embryo development ending in birth or egg hatching, morphogenesis of an epithelium, morphogenesis of an ep…
FBgn0033899	CG13016		WBGene00017003	D1007.5	lipid storage, positive regulation of growth rate, positive regulation of multicellular organism growth, body morphogenesis, positive regulation of locomotion, positive regulation of growth rate, body morphogenesis, locomotion
FBgn0037026	CG3634	biological_process	WBGene00008686	F11A10.5	nematode larval development, growth, nematode larval development, reproduction, growth, nematode larval development, growth, nematode larval development, growth, nematode larval development, growth, nematode larval development, positive regulation of multicellular organism growth, body morphogenesis, positive regulation of multicellular organism growth, reproduction, growth, nematode larval devel…
FBgn0038569	CG7218	biological_process	WBGene00009172	F26F2.7	embryo development ending in birth or egg hatching
FBgn0004643	mit(1)15	chromosome segregation, regulation of meiosis, meiotic anaphase I, mitotic cell cycle spindle assembly checkpoint, mitotic sister chromatid segregation, mitotic cell cycle spindle assembly checkpoint, cell cycle, neurogenesis	WBGene00017643	czw-1	mitosis, reproduction, positive regulation of growth rate, embryo development ending in birth or egg hatching, locomotion, locomotion, reproduction, embryo development ending in birth or egg hatching, nematode larval development, embryo development ending in birth or egg hatching, growth, nematode larval development, locomotion, reproduction, receptor-mediated endocytosis, secretion by cell, repr…
FBgn0028686	Rpt3	proteolysis, proteolysis, proteolysis, proteasomal ubiquitin-dependent protein catabolic process, protein catabolic process, response to DNA damage stimulus	WBGene00004503	rpt-3	protein catabolic process, embryo development ending in birth or egg hatching, reproduction, embryo development ending in birth or egg hatching, embryo development ending in birth or egg hatching, nematode larval development, embryo development ending in birth or egg hatching, nematode larval development, nematode larval development, determination of adult lifespan, determination of adult lifespa…
FBgn0261278	grp	protein phosphorylation, protein phosphorylation, DNA damage checkpoint, DNA damage checkpoint, regulation of syncytial blastoderm mitotic cell cycle, cell cycle, DNA damage checkpoint, DNA damage checkpoint, regulation of syncytial blastoderm mitotic cell cycle, DNA damage checkpoint, protein phosphorylation, cell cycle checkpoint, protein phosphorylation, mitotic cell cycle checkpoint, embryoni…	WBGene00000498	chk-1	protein phosphorylation, protein phosphorylation, embryo development ending in birth or egg hatching, nematode larval development, body morphogenesis, positive regulation of growth rate, embryo development ending in birth or egg hatching, reproduction, reproduction, embryo development ending in birth or egg hatching, embryo development ending in birth or egg hatching, reproduction, cell cycle, ce…
FBgn0032216	CG5384	ubiquitin-dependent protein catabolic process, protein ubiquitination	WBGene00006856	usp-14	ubiquitin-dependent protein catabolic process
FBgn0034921	Dcp1	nuclear-transcribed mRNA catabolic process, pole plasm oskar mRNA localization, gene silencing by miRNA, nuclear-transcribed mRNA catabolic process, nonsense-mediated decay, regulation of cytoplasmic mRNA processing body assembly, positive regulation of gene silencing by miRNA	WBGene00021929	dcap-1	positive regulation of growth rate, embryo development ending in birth or egg hatching, deadenylation-dependent decapping of nuclear-transcribed mRNA
FBgn0053182	Kdm4B	histone demethylation, histone H3-K36 demethylation, histone H3-K9 demethylation, histone H3-K9 demethylation	WBGene00012982	jmjd-2	determination of adult lifespan, determination of adult lifespan
FBgn0033233	Kdm4A	histone demethylation, histone H3-K9 demethylation, histone H3-K36 demethylation, positive regulation of gene expression	WBGene00012982	jmjd-2	determination of adult lifespan, determination of adult lifespan
FBgn0034962	MAN1	negative regulation of BMP signaling pathway	WBGene00002275	lem-2	determination of adult lifespan, cell division, cytokinesis, embryo development ending in birth or egg hatching, embryo development ending in birth or egg hatching, chromosome segregation, response to X-ray
FBgn0037250	CG1074	methylation	WBGene00022107	Y71F9AL.1
FBgn0035627	Sse	mitotic sister chromatid segregation, meiosis I, mitotic sister chromatid segregation, proteolysis, phagocytosis, engulfment, neurogenesis	WBGene00004775	sep-1	proteolysis, embryo development ending in birth or egg hatching, meiotic chromosome segregation, embryo development ending in birth or egg hatching, embryo development ending in birth or egg hatching, meiosis, meiosis, embryo development ending in birth or egg hatching, hermaphrodite genitalia development, reproduction, embryo development ending in birth or egg hatching, embryo development ending…
FBgn0003676	T-cp1	protein folding, protein folding, phagocytosis, engulfment, mitotic spindle organization	WBGene00000377	cct-1	cellular protein metabolic process, protein folding, embryo development ending in birth or egg hatching, reproduction, positive regulation of growth rate, embryo development ending in birth or egg hatching, reproduction, hermaphrodite genitalia development, embryo development ending in birth or egg hatching, growth, nematode larval development, reproduction, growth, nematode larval development, r…
FBgn0085478	CG34449		WBGene00012718	dhhc-8
FBgn0030088	CG7039	biological_process, small GTPase mediated signal transduction	WBGene00021841	Y54E10BR.2	small GTPase mediated signal transduction
FBgn0035601	Uev1A		WBGene00006730	uev-1	regulation of protein localization at cell surface, regulation of locomotion involved in locomotory behavior
FBgn0038593	CG7146	neuron projection morphogenesis	WBGene00011625	vps-39	intracellular protein transport, vesicle-mediated transport, morphogenesis of an epithelium, embryo development ending in birth or egg hatching, cell death, lipid storage, embryo development ending in birth or egg hatching, lipid storage
FBgn0026876	CG11403	nucleotide-excision repair, DNA duplex unwinding	WBGene00010839	chl-1	nucleobase-containing compound metabolic process, embryo development ending in birth or egg hatching
FBgn0032750	CG10495	tRNA processing, oxidation-reduction process	WBGene00016674	C45G9.2	tRNA processing, oxidation-reduction process
FBgn0015621	Clp	mRNA cleavage, mRNA polyadenylation, mRNA cleavage, neurogenesis	WBGene00044329	cpsf-4	embryo development ending in birth or egg hatching, cell division, cytokinesis, embryo development ending in birth or egg hatching, embryo development ending in birth or egg hatching, embryo development ending in birth or egg hatching, nematode larval development, nematode larval development, embryo development ending in birth or egg hatching, negative regulation of vulval development
FBgn0030049	Trf4-1	sister chromatid cohesion, ncRNA polyadenylation involved in polyadenylation-dependent ncRNA catabolic process	WBGene00014115	gld-4	positive regulation of growth rate, embryo development ending in birth or egg hatching, hermaphrodite genitalia development, positive regulation of growth rate, reproduction, reproduction, embryo development ending in birth or egg hatching, germ cell development, mRNA polyadenylation
FBgn0024992	CG2658	proteolysis, proteolysis, protein catabolic process	WBGene00021425	ppgn-1	proteolysis, protein catabolic process
FBgn0261811	pico	signal transduction, positive regulation of growth, actin filament organization, positive regulation of cell division, positive regulation of developmental growth, regulation of cell size, imaginal disc development, lateral inhibition	WBGene00012546	Y37D8A.4
FBgn0037199	CG11137		WBGene00022776	perm-3	growth, nematode larval development, reproduction, embryo development ending in birth or egg hatching, reproduction
FBgn0086605	CG9853	biological_process	WBGene00017825	cee-1	positive regulation of growth rate, nematode larval development, embryo development ending in birth or egg hatching
FBgn0000251	cad	blastoderm segmentation, genital disc anterior/posterior pattern formation, hindgut morphogenesis, gastrulation involving germ band extension, germ-band extension, segment specification, hindgut morphogenesis, Malpighian tubule morphogenesis, analia development, anterior/posterior axis specification, positive regulation of cell proliferation, positive regulation of transcription from RNA polymera…	WBGene00003912	pal-1	regulation of transcription, DNA-dependent, embryo development ending in birth or egg hatching, embryo development ending in birth or egg hatching, embryo development ending in birth or egg hatching, embryo development ending in birth or egg hatching, embryo development ending in birth or egg hatching, embryo development ending in birth or egg hatching, embryo development ending in birth or egg h…
FBgn0025820	JTBR		WBGene00002180	jtr-1
FBgn0005696	DNApol-alpha73	DNA-dependent DNA replication, DNA replication	WBGene00001002	div-1	DNA replication, embryo development ending in birth or egg hatching, embryo development ending in birth or egg hatching, embryo development ending in birth or egg hatching, embryo development ending in birth or egg hatching, embryo development ending in birth or egg hatching, embryo development ending in birth or egg hatching, embryo development ending in birth or egg hatching, embryo development…
FBgn0051120	CG31120		WBGene00015915	C17G10.1	oxidation-reduction process, oxidation-reduction process, oxidation-reduction process, meiosis, meiotic chromosome segregation
FBgn0083992	Mkp	protein dephosphorylation, inactivation of MAPK activity	WBGene00021867	Y54F10BM.13	protein dephosphorylation, protein dephosphorylation, protein dephosphorylation, protein dephosphorylation
FBgn0027090	Aats-gln	glutaminyl-tRNA aminoacylation	WBGene00001336	qars-1	tRNA aminoacylation, tRNA aminoacylation, glutaminyl-tRNA aminoacylation, glutaminyl-tRNA aminoacylation, tRNA aminoacylation for protein translation, tRNA aminoacylation for protein translation, tRNA aminoacylation for protein translation, translation, positive regulation of growth rate, embryo development ending in birth or egg hatching, growth, nematode larval development, embryo development e…
FBgn0031286	CG3862		WBGene00012370	W09G3.7	meiotic chromosome segregation
FBgn0029113	Uba2	protein sumoylation, positive regulation of NF-kappaB transcription factor activity, SMT3-dependent protein catabolic process, humoral immune response, protein sumoylation	WBGene00006700	uba-2	protein modification process, oviposition, hermaphrodite genitalia development, positive regulation of vulval development, growth, nematode larval development, hermaphrodite genitalia development, embryo development ending in birth or egg hatching, growth, nematode larval development, locomotion, hermaphrodite genitalia development, reproduction, positive regulation of growth rate, embryo develop…
FBgn0033209	CG12107		WBGene00018431	F44E7.9
FBgn0026582	CG9418		WBGene00012209	hmg-20	meiotic chromosome segregation, reproduction
FBgn0025743	mbt	mushroom body development, protein phosphorylation, protein phosphorylation, protein phosphorylation, cytoskeleton organization, activation of MAPK activity, positive regulation of compound eye photoreceptor development, compound eye photoreceptor cell differentiation, compound eye development, lateral inhibition, Golgi organization, negative regulation of cell size	WBGene00006443	pak-2	protein phosphorylation, protein phosphorylation
FBgn0029929	CG4593	neurogenesis	WBGene00013213	Y54G11A.2
FBgn0029134	Prosbeta5	proteasomal ubiquitin-dependent protein catabolic process, proteolysis involved in cellular protein catabolic process, mitotic spindle organization, mitotic spindle elongation, cell proliferation, centrosome organization, neurogenesis	WBGene00003951	pbs-5	proteolysis involved in cellular protein catabolic process, proteolysis involved in cellular protein catabolic process, embryo development ending in birth or egg hatching, embryo development ending in birth or egg hatching, embryo development ending in birth or egg hatching, growth, nematode larval development, locomotion, reproduction, embryo development ending in birth or egg hatching, growth, …
FBgn0015625	CycB3	mitotic spindle organization, mitosis, cytokinesis after mitosis, cytokinesis after mitosis, regulation of cyclin-dependent protein kinase activity, regulation of G2/M transition of mitotic cell cycle, syncytial blastoderm mitotic cell cycle, regulation of chromatin binding	WBGene00000868	cyb-3	regulation of cyclin-dependent protein kinase activity, regulation of cyclin-dependent protein kinase activity, regulation of cell cycle, regulation of G2/M transition of mitotic cell cycle, embryo development ending in birth or egg hatching, embryo development ending in birth or egg hatching, cell division, cytokinesis, embryo development ending in birth or egg hatching, embryo development endin…
FBgn0000405	CycB	G2/M transition of mitotic cell cycle, G2/M transition of mitotic cell cycle, mitotic anaphase B, mitotic chromosome movement towards spindle pole, cytokinesis, cytokinesis after mitosis, attachment of spindle microtubules to kinetochore, embryonic development via the syncytial blastoderm, attachment of spindle microtubules to kinetochore, regulation of cyclin-dependent protein kinase activity, c…	WBGene00000867	cyb-2.2	regulation of cyclin-dependent protein kinase activity, regulation of cell cycle, embryo development ending in birth or egg hatching, embryo development ending in birth or egg hatching, growth, nematode larval development, reproduction, cell division, cytokinesis, negative regulation of multicellular organism growth, embryo development ending in birth or egg hatching, locomotion, embryo developme…
FBgn0000405	CycB	G2/M transition of mitotic cell cycle, G2/M transition of mitotic cell cycle, mitotic anaphase B, mitotic chromosome movement towards spindle pole, cytokinesis, cytokinesis after mitosis, attachment of spindle microtubules to kinetochore, embryonic development via the syncytial blastoderm, attachment of spindle microtubules to kinetochore, regulation of cyclin-dependent protein kinase activity, c…	WBGene00000866	cyb-2.1	regulation of cyclin-dependent protein kinase activity, regulation of cell cycle, embryo development ending in birth or egg hatching, embryo development ending in birth or egg hatching, embryo development ending in birth or egg hatching, growth, nematode larval development, reproduction, cell division, cytokinesis, negative regulation of multicellular organism growth, embryo development ending in…
FBgn0000405	CycB	G2/M transition of mitotic cell cycle, G2/M transition of mitotic cell cycle, mitotic anaphase B, mitotic chromosome movement towards spindle pole, cytokinesis, cytokinesis after mitosis, attachment of spindle microtubules to kinetochore, embryonic development via the syncytial blastoderm, attachment of spindle microtubules to kinetochore, regulation of cyclin-dependent protein kinase activity, c…	WBGene00000865	cyb-1	regulation of cyclin-dependent protein kinase activity, regulation of cell cycle, embryo development ending in birth or egg hatching, growth, nematode larval development, reproduction, cell division, cytokinesis, oogenesis, embryo development ending in birth or egg hatching, oocyte maturation, positive regulation of protein phosphorylation
FBgn0017577	Mcm5	pre-replicative complex assembly, chromosome condensation, DNA-dependent DNA replication initiation, resolution of meiotic recombination intermediates, DNA endoreduplication, meiosis	WBGene00003157	mcm-5	DNA replication, DNA-dependent DNA replication initiation, embryo development ending in birth or egg hatching, embryo development ending in birth or egg hatching, embryo development ending in birth or egg hatching, cell division, cytokinesis, embryo development ending in birth or egg hatching, embryo development ending in birth or egg hatching, embryo development ending in birth or egg hatching, …
FBgn0040298	Myt1	protein phosphorylation, protein phosphorylation, protein phosphorylation, G2/M transition of mitotic cell cycle, negative regulation of mitotic cell cycle, G2/M transition of mitotic cell cycle, male germ-line stem cell division, spermatogonial cell division, meiosis, male meiosis, spermatocyte division, germarium-derived cystoblast division, female meiosis, positive regulation of cell size, mit…	WBGene00006940	wee-1.3	protein phosphorylation, reproduction, embryo development ending in birth or egg hatching, reproduction, embryo development ending in birth or egg hatching, reproduction, lipid storage, lipid storage, oogenesis, oogenesis, reproduction, reproduction, reproduction, receptor-mediated endocytosis, reproduction, oocyte maturation
FBgn0019686	lok	protein phosphorylation, germ cell development, protein phosphorylation, cell cycle checkpoint, protein phosphorylation, DNA damage response, signal transduction resulting in induction of apoptosis, DNA damage checkpoint, response to DNA damage stimulus, cell cycle checkpoint, apoptosis, DNA damage checkpoint, activation of caspase activity, response to DNA damage stimulus, germ cell programmed c…	WBGene00000499	chk-2	protein phosphorylation, protein phosphorylation, reproduction, meiotic chromosome segregation, reproduction, meiotic chromosome segregation, reproduction, meiotic chromosome segregation, embryo development ending in birth or egg hatching, meiosis
FBgn0041781	SCAR	cytoskeleton organization, compound eye morphogenesis, axonal fasciculation, actin filament reorganization involved in cell cycle, axonogenesis, female germline ring canal stabilization, cortical actin cytoskeleton organization, regulation of cell shape, cell projection assembly, regulation of cell shape, actin filament organization, actin filament-based process, phagocytosis, engulfment, actin c…	WBGene00006958	wve-1	positive regulation of growth rate, embryo development ending in birth or egg hatching, body morphogenesis, body morphogenesis, locomotion, hermaphrodite genitalia development, embryo development ending in birth or egg hatching, growth, nematode larval development, oviposition, locomotion, hermaphrodite genitalia development, growth, nematode larval development, reproduction, hermaphrodite genita…
FBgn0259166	CG42271	phosphatidylinositol dephosphorylation, phosphatidylinositol dephosphorylation	WBGene00010975	R01H10.7
FBgn0002787	Mov34	ubiquitin-dependent protein catabolic process, proteolysis, proteolysis, proteolysis, proteasomal ubiquitin-dependent protein catabolic process, cellular process, cell proliferation, mitotic spindle elongation, mitotic spindle organization, neurogenesis	WBGene00004464	rpn-8	embryo development ending in birth or egg hatching, growth, nematode larval development, reproduction, embryo development ending in birth or egg hatching, embryo development ending in birth or egg hatching, nematode larval development, reproduction, embryo development ending in birth or egg hatching, nematode larval development, embryo development ending in birth or egg hatching, determination of…
FBgn0028837	CSN6	protein stabilization, mitotic cell cycle G2/M transition DNA damage checkpoint, lateral inhibition	WBGene00000818	csn-6	embryo development ending in birth or egg hatching, reproduction, embryo development ending in birth or egg hatching, cytokinesis, apoptosis, reproduction
FBgn0028695	Rpn1	proteolysis, proteolysis, proteolysis, proteasomal ubiquitin-dependent protein catabolic process, regulation of protein catabolic process, cell proliferation, mitotic spindle elongation, mitotic spindle organization	WBGene00004458	rpn-1	regulation of protein catabolic process, reproduction, embryo development ending in birth or egg hatching, embryo development ending in birth or egg hatching, reproduction, embryo development ending in birth or egg hatching, reproduction, growth, nematode larval development, determination of adult lifespan, determination of adult lifespan, determination of adult lifespan, apoptosis, reproduction,…
FBgn0026192	par-6	zonula adherens assembly, establishment or maintenance of polarity of embryonic epithelium, establishment or maintenance of neuroblast polarity, establishment or maintenance of epithelial cell apical/basal polarity, border follicle cell migration, apical protein localization, establishment or maintenance of epithelial cell apical/basal polarity, oocyte axis specification, zonula adherens assembly…	WBGene00003921	par-6	embryo development ending in birth or egg hatching, embryo development ending in birth or egg hatching, embryo development ending in birth or egg hatching, growth, nematode larval development, positive regulation of growth rate, embryo development ending in birth or egg hatching, embryo development ending in birth or egg hatching, embryo development ending in birth or egg hatching, receptor-media…
FBgn0003165	pum	oogenesis, pole cell migration, germ-line stem cell division, negative regulation of translation, germ-line stem cell division, germ cell development, oogenesis, cell fate determination, positive regulation of translation, head involution, synaptic transmission, anterior/posterior axis specification, embryo, germ cell development, mitosis, negative regulation of cell cycle, cell migration, nuclea…	WBGene00004242	puf-6	oogenesis, hatching, cell division, cytokinesis, oogenesis, negative regulation of cell proliferation, germ cell development, negative regulation of translation, mRNA catabolic process
FBgn0003165	pum	oogenesis, pole cell migration, germ-line stem cell division, negative regulation of translation, germ-line stem cell division, germ cell development, oogenesis, cell fate determination, positive regulation of translation, head involution, synaptic transmission, anterior/posterior axis specification, embryo, germ cell development, mitosis, negative regulation of cell cycle, cell migration, nuclea…	WBGene00004243	puf-7	oogenesis, hatching, cell division, cytokinesis, oogenesis, germ cell development
FBgn0003165	pum	oogenesis, pole cell migration, germ-line stem cell division, negative regulation of translation, germ-line stem cell division, germ cell development, oogenesis, cell fate determination, positive regulation of translation, head involution, synaptic transmission, anterior/posterior axis specification, embryo, germ cell development, mitosis, negative regulation of cell cycle, cell migration, nuclea…	WBGene00004241	puf-5	oogenesis, hatching, cell division, cytokinesis, oogenesis
FBgn0003165	pum	oogenesis, pole cell migration, germ-line stem cell division, negative regulation of translation, germ-line stem cell division, germ cell development, oogenesis, cell fate determination, positive regulation of translation, head involution, synaptic transmission, anterior/posterior axis specification, embryo, germ cell development, mitosis, negative regulation of cell cycle, cell migration, nuclea…	WBGene00022257	puf-11	embryo development ending in birth or egg hatching, embryo development ending in birth or egg hatching, reproduction, embryo development ending in birth or egg hatching, embryo development ending in birth or egg hatching, apoptosis
FBgn0034791	CG3501	biological_process	WBGene00009118	F25H2.4	positive regulation of growth rate, embryo development ending in birth or egg hatching, embryo development, embryo development ending in birth or egg hatching, locomotion, reproduction, growth, nematode larval development, locomotion, positive regulation of growth rate, embryo development ending in birth or egg hatching, locomotion, reproduction, embryo development ending in birth or egg hatching…
FBgn0039339	CG5116		WBGene00009769	F46B6.4
FBgn0014861	Mcm2	pre-replicative complex assembly, pre-replicative complex assembly, cell proliferation, DNA replication, chromosome condensation, DNA replication, DNA-dependent DNA replication initiation, neurogenesis, lateral inhibition	WBGene00003154	mcm-2	DNA replication, DNA-dependent DNA replication initiation, embryo development ending in birth or egg hatching, embryo development ending in birth or egg hatching, reproduction, hermaphrodite genitalia development, embryo development ending in birth or egg hatching, determination of adult lifespan, embryo development ending in birth or egg hatching, determination of adult lifespan, determination o…
FBgn0086134	Pros25	ubiquitin-dependent protein catabolic process, proteolysis, proteasomal ubiquitin-dependent protein catabolic process, ubiquitin-dependent protein catabolic process, cellular process, mitotic spindle elongation, cell proliferation, mitotic spindle organization	WBGene00003923	pas-2	ubiquitin-dependent protein catabolic process, proteolysis involved in cellular protein catabolic process, nematode larval development, embryo development ending in birth or egg hatching, embryo development ending in birth or egg hatching
FBgn0053181	CG33181	cation transport	WBGene00019504	K07H8.2	cation transport
FBgn0031422	CG9870	GPI anchor biosynthetic process	WBGene00022447	hpo-20	GPI anchor biosynthetic process
FBgn0261394	Pros29	proteolysis, ubiquitin-dependent protein catabolic process, proteasomal ubiquitin-dependent protein catabolic process, ubiquitin-dependent protein catabolic process, mitotic spindle elongation, mitotic spindle organization, cell proliferation	WBGene00003924	pas-3	ubiquitin-dependent protein catabolic process, proteolysis involved in cellular protein catabolic process, positive regulation of growth rate, embryo development ending in birth or egg hatching, positive regulation of growth rate, embryo development ending in birth or egg hatching, embryo development ending in birth or egg hatching, embryo development ending in birth or egg hatching, reproduction…
FBgn0011573	Cdc37	intracellular protein kinase cascade, transmembrane receptor protein tyrosine kinase signaling pathway, neurogenesis	WBGene00021097	cdc-37	positive regulation of growth rate, embryo development ending in birth or egg hatching, body morphogenesis, positive regulation of growth rate, morphogenesis of an epithelium, embryo development ending in birth or egg hatching, locomotion, hermaphrodite genitalia development, reproduction, embryo development ending in birth or egg hatching, receptor-mediated endocytosis, reproduction, hermaphrodi…
FBgn0043458	CG12084		WBGene00020762	zer-1
FBgn0039625	beta4GalNAcTB	carbohydrate metabolic process, N-acetylglucosamine metabolic process, glycolipid biosynthetic process	WBGene00000269	bre-4	carbohydrate metabolic process, response to toxin, response to toxin, positive regulation of Notch signaling pathway, protein glycosylation
FBgn0039258	beta4GalT7	proteoglycan biosynthetic process, glycosaminoglycan biosynthetic process, heparan sulfate proteoglycan biosynthetic process, chondroitin sulfate biosynthetic process, proteoglycan biosynthetic process, N-glycan processing	WBGene00005021	sqv-3	carbohydrate metabolic process, embryo development ending in birth or egg hatching, morphogenesis of an epithelium, vulval development, regulation of cell morphogenesis, oviposition, reproduction, embryo development ending in birth or egg hatching, chondroitin sulfate biosynthetic process, heparan sulfate proteoglycan biosynthetic process
FBgn0033656	S2P	sterol regulatory element binding protein cleavage, proteolysis	WBGene00013225	Y56A3A.2	proteolysis, proteolysis, positive regulation of growth rate, axonal fasciculation, locomotion
FBgn0037376	CG2051	chromatin silencing at telomere, histone acetylation	WBGene00044069	hat-1	chromatin modification, embryo development ending in birth or egg hatching
FBgn0050443	Opbp		WBGene00013350	slr-2
FBgn0038578	MED17	transcription from RNA polymerase II promoter, transcription initiation from RNA polymerase II promoter, cellular process, sex comb development, transcription from RNA polymerase II promoter, regulation of transcription from RNA polymerase II promoter, positive regulation of transcription from RNA polymerase II promoter, mitotic cell cycle G2/M transition DNA damage checkpoint	WBGene00007017	mdt-17	regulation of transcription from RNA polymerase II promoter, embryo development ending in birth or egg hatching, reproduction, embryo development ending in birth or egg hatching, oviposition, locomotion, hermaphrodite genitalia development, positive regulation of growth rate, embryo development ending in birth or egg hatching, body morphogenesis, hermaphrodite genitalia development, reproduction,…
FBgn0030717	CG8931		WBGene00012740	Y40B1B.8
FBgn0011290	Taf12	regulation of transcription, DNA-dependent, transcription initiation from RNA polymerase II promoter, transcription initiation from RNA polymerase II promoter, neurogenesis	WBGene00006396	taf-12	transcription initiation, DNA-dependent, embryo development ending in birth or egg hatching, embryo development ending in birth or egg hatching, embryo development ending in birth or egg hatching, embryo development ending in birth or egg hatching, embryo development ending in birth or egg hatching, embryo development ending in birth or egg hatching, embryo development ending in birth or egg hatc…
FBgn0030678	CG11679	biological_process	WBGene00014176	ZK1010.2
FBgn0036372	CG10083	cell migration	WBGene00010664	K08E3.4
FBgn0010288	Uch	protein deubiquitination, ubiquitin-dependent protein catabolic process	WBGene00006722	ubh-2	ubiquitin-dependent protein catabolic process
FBgn0019637	Atu	regulation of hemocyte proliferation	WBGene00007110	B0035.11	embryo development ending in birth or egg hatching, growth, nematode larval development, positive regulation of growth rate, embryo development ending in birth or egg hatching, growth, nematode larval development, positive regulation of growth rate, body morphogenesis, reproduction, positive regulation of growth rate, embryo development ending in birth or egg hatching, body morphogenesis, locomot…
FBgn0034403	CG18190		WBGene00012156	ebp-2
FBgn0032214	CG4968	protein metabolic process	WBGene00007718	otub-1	protein metabolic process, protein K48-linked deubiquitination
FBgn0003124	polo	male meiosis, mitosis, cytokinesis, male meiosis chromosome segregation, pronuclear migration, pronuclear fusion, female meiosis II, sperm aster formation, spindle assembly involved in female meiosis II, protein phosphorylation, protein localization, astral microtubule nucleation, protein phosphorylation, mitosis, cell cycle, phagocytosis, engulfment, female meiosis, mitotic spindle organization,…	WBGene00004042	plk-1	protein phosphorylation, protein phosphorylation, embryo development ending in birth or egg hatching, embryo development ending in birth or egg hatching, embryo development ending in birth or egg hatching, reproduction, cell division, cytokinesis, embryo development ending in birth or egg hatching, reproduction, embryo development ending in birth or egg hatching, nematode larval development, dete…
FBgn0003124	polo	male meiosis, mitosis, cytokinesis, male meiosis chromosome segregation, pronuclear migration, pronuclear fusion, female meiosis II, sperm aster formation, spindle assembly involved in female meiosis II, protein phosphorylation, protein localization, astral microtubule nucleation, protein phosphorylation, mitosis, cell cycle, phagocytosis, engulfment, female meiosis, mitotic spindle organization,…	WBGene00004043	plk-2	protein phosphorylation, protein phosphorylation, regulation of meiosis I, regulation of meiosis I
FBgn0036640	nxf2	mRNA export from nucleus, mRNA export from nucleus, mRNA transport	WBGene00003835	nxf-2	embryo development ending in birth or egg hatching
FBgn0003321	sbr	mRNA export from nucleus, mRNA export from nucleus, adult behavior, long-term memory, poly(A)+ mRNA export from nucleus, mRNA export from nucleus, mRNA export from nucleus, mRNA export from nucleus, nuclear export, mRNA polyadenylation	WBGene00003835	nxf-2	embryo development ending in birth or egg hatching
FBgn0027583	CG7601	metabolic process	WBGene00000993	dhs-30	metabolic process
FBgn0002989	okr	dorsal appendage formation, oogenesis, double-strand break repair, DNA recombination, intracellular mRNA localization, regulation of translation, reciprocal meiotic recombination, chromosome condensation, reciprocal meiotic recombination, DNA repair, oogenesis, double-strand break repair, response to ionizing radiation, double-strand break repair via homologous recombination, chromatin remodeling…	WBGene00004298	rad-54	cellular response to stress
FBgn0026380	Prosbeta3	proteolysis, proteasomal ubiquitin-dependent protein catabolic process, proteolysis involved in cellular protein catabolic process, response to DNA damage stimulus, neurogenesis	WBGene00003949	pbs-3	proteolysis involved in cellular protein catabolic process, embryo development ending in birth or egg hatching, locomotion, reproduction, embryo development ending in birth or egg hatching, nematode larval development, embryo development ending in birth or egg hatching, determination of adult lifespan, determination of adult lifespan, determination of adult lifespan, reproduction
FBgn0034495	CG11788		WBGene00019595	K09H9.2
FBgn0025808	Rad17	DNA repair, DNA repair, cell cycle	WBGene00001998	hpr-17	DNA repair, cell cycle, positive regulation of growth rate, response to DNA damage stimulus
FBgn0037609	CG9773		WBGene00006785	unc-50	axonal fasciculation, locomotion
FBgn0035907	CG6662	glutathione metabolic process	WBGene00001792	gst-44	metabolic process
FBgn0037567	Gfr		WBGene00008237	nstp-10
FBgn0035440	CG14969		WBGene00009627	F42A8.3
FBgn0030890	CG7536		WBGene00012659	Y39A1A.22	positive regulation of growth rate, body morphogenesis, positive regulation of growth rate, body morphogenesis, oviposition, embryo development ending in birth or egg hatching
FBgn0038432	CG14883	lipid metabolic process, glycerol metabolic process, neuron projection morphogenesis	WBGene00022532	ZC155.4	glycerol metabolic process, lipid metabolic process
FBgn0032251	CG13142	DNA repair	WBGene00010409	H21P03.2	DNA repair
FBgn0034925	CG5339		WBGene00020199	T03G11.6
FBgn0024912	agt	DNA dealkylation involved in DNA repair	WBGene00000093	agt-1	DNA repair, DNA dealkylation involved in DNA repair
FBgn0040075	rept	chromatin silencing, negative regulation of gene expression, mitotic cell cycle G2/M transition DNA damage checkpoint, neurogenesis	WBGene00020687	ruvb-2	positive regulation of growth rate, embryo development ending in birth or egg hatching, growth, nematode larval development, reproduction, cell division, cytokinesis, positive regulation of growth rate, embryo development ending in birth or egg hatching, embryo development ending in birth or egg hatching, growth, nematode larval development, reproduction, hermaphrodite genitalia development, embr…
FBgn0015286	Rala	GTP catabolic process, negative regulation of JNK cascade, regulation of cell morphogenesis, negative regulation of JNK cascade, dorsal closure, negative regulation of JNK cascade, Ras protein signal transduction, negative regulation of JNK cascade, negative regulation of JNK cascade, negative regulation of JNK cascade, negative regulation of JNK cascade, negative regulation of JNK cascade, innat…	WBGene00021811	ral-1	small GTPase mediated signal transduction, GTP catabolic process, signal transduction, reproduction, determination of adult lifespan, oogenesis, reproduction, positive regulation of vulval development, positive regulation of vulval development, positive regulation of vulval development, positive regulation of vulval development, epidermal growth factor receptor signaling pathway, epidermal growth…
FBgn0033884	CG13344		WBGene00021812	Y53G8AR.5
FBgn0000499	dsh	oogenesis, establishment of ommatidial planar polarity, negative regulation of heart induction by canonical Wnt receptor signaling pathway, heart formation, Wnt receptor signaling pathway, establishment of tissue polarity, Wnt receptor signaling pathway, heart development, Wnt receptor signaling pathway, imaginal disc-derived wing hair organization, imaginal disc-derived wing hair organization, i…	WBGene00001102	dsh-2	multicellular organismal development, embryo development ending in birth or egg hatching, growth, nematode larval development, reproduction, morphogenesis of an epithelium, embryo development ending in birth or egg hatching, body morphogenesis, locomotion, morphogenesis of an epithelium, body morphogenesis, hermaphrodite genitalia development, embryo development ending in birth or egg hatching, e…
FBgn0031006	rictor	response to DNA damage stimulus, dendrite morphogenesis, synaptic growth at neuromuscular junction	WBGene00009245	rict-1	lipid storage, lipid storage, feeding behavior, determination of adult lifespan
FBgn0037530	CG2943		WBGene00019209	H17B01.4	positive regulation of growth rate, receptor-mediated endocytosis
FBgn0040309	Jafrac1	hydrogen peroxide catabolic process, cell redox homeostasis, oxidation-reduction process, response to DNA damage stimulus, determination of adult lifespan, response to starvation, germ cell development, germ cell migration, response to oxidative stress, cell adhesion	WBGene00006434	prdx-2	oxidation-reduction process, oxidation-reduction process, positive regulation of multicellular organism growth, hydrogen peroxide catabolic process, response to hydrogen peroxide, heat acclimation, response to metal ion, negative regulation of transcription from RNA polymerase II promoter, determination of adult lifespan
FBgn0039066	EloA	positive regulation of transcription elongation from RNA polymerase II promoter, transcription elongation from RNA polymerase II promoter	WBGene00010990	R03D7.4	regulation of transcription, DNA-dependent, RNA interference, RNA interference, determination of adult lifespan
FBgn0034918	wibg	biological_process	WBGene00011871	T20G5.9
FBgn0016983	smid	neurogenesis	WBGene00003119	mac-1	growth, nematode larval development, lipid metabolic process, reproduction, reproduction, reproduction, lipid storage
FBgn0003656	sws	brain development, sensory perception of smell, phosphatidylcholine metabolic process, cellular membrane organization, membrane lipid metabolic process, neuron apoptosis	WBGene00022718	ZK370.4	lipid metabolic process, metabolic process
FBgn0024177	zpg	germ cell development, germ cell development, intercellular transport	WBGene00002144	inx-22	oocyte development
FBgn0024177	zpg	germ cell development, germ cell development, intercellular transport	WBGene00002143	inx-21	embryo development ending in birth or egg hatching
FBgn0024177	zpg	germ cell development, germ cell development, intercellular transport	WBGene00002136	inx-14	embryo development ending in birth or egg hatching, lipid storage, reproduction, embryo development ending in birth or egg hatching, embryo development ending in birth or egg hatching, determination of adult lifespan, embryo development ending in birth or egg hatching, embryo development ending in birth or egg hatching, apoptosis, reproduction, oocyte development
FBgn0035993	Nf-YA	regulation of transcription, DNA-dependent, phagocytosis, engulfment, regulation of cell cycle, lateral inhibition	WBGene00011614	nfya-1	regulation of transcription, DNA-dependent
FBgn0035993	Nf-YA	regulation of transcription, DNA-dependent, phagocytosis, engulfment, regulation of cell cycle, lateral inhibition	WBGene00043056	nfya-2	regulation of transcription, DNA-dependent
FBgn0035402	CG12082	protein deubiquitination, ubiquitin-dependent protein catabolic process, neuron projection morphogenesis	WBGene00020839	usp-5	ubiquitin-dependent protein catabolic process, positive regulation of growth rate, locomotion, hermaphrodite genitalia development, positive regulation of growth rate, positive regulation of locomotion, hermaphrodite genitalia development, reproduction
FBgn0024542	Neos	nuclear mRNA splicing, via spliceosome	WBGene00020399	ztf-4
FBgn0261854	aPKC	protein phosphorylation, zonula adherens assembly, establishment or maintenance of polarity of embryonic epithelium, establishment or maintenance of epithelial cell apical/basal polarity, establishment or maintenance of neuroblast polarity, germarium-derived oocyte fate determination, memory, asymmetric neuroblast division, cell-cell junction assembly, apical protein localization, asymmetric prot…	WBGene00004034	pkc-3	protein phosphorylation, protein phosphorylation, protein phosphorylation, protein phosphorylation, embryo development ending in birth or egg hatching, body morphogenesis, hermaphrodite genitalia development, negative regulation of vulval development, embryo development ending in birth or egg hatching, reproduction, embryo development ending in birth or egg hatching, receptor-mediated endocytosis…
FBgn0037020	Pex14	protein targeting to peroxisome, protein import into peroxisome matrix, negative regulation of transcription, DNA-dependent, peroxisome organization	WBGene00004199	prx-14	protein import into peroxisome matrix, negative regulation of transcription, DNA-dependent, positive regulation of growth rate, growth, nematode larval development, embryo development ending in birth or egg hatching
FBgn0034071	CG8405	wing disc dorsal/ventral pattern formation	WBGene00021985	Y59C2A.2
FBgn0028700	RfC38	DNA replication, neurogenesis	WBGene00004339	rfc-3	DNA replication, embryo development ending in birth or egg hatching, embryo development ending in birth or egg hatching, positive regulation of growth rate, embryo development ending in birth or egg hatching, positive regulation of growth rate, embryo development ending in birth or egg hatching, locomotion, hermaphrodite genitalia development, reproduction, embryo development ending in birth or e…
FBgn0024330	MED6	transcription from RNA polymerase II promoter, transcription from RNA polymerase II promoter, transcription initiation from RNA polymerase II promoter, transcription from RNA polymerase II promoter, regulation of transcription from RNA polymerase II promoter, lateral inhibition	WBGene00003164	mdt-6	regulation of transcription from RNA polymerase II promoter, regulation of transcription from RNA polymerase II promoter, embryo development ending in birth or egg hatching, embryo development ending in birth or egg hatching, embryo development ending in birth or egg hatching, gonad development, germ cell development, embryo development ending in birth or egg hatching, growth, nematode larval dev…
FBgn0033247	Nup44A	SMAD protein import into nucleus, oogenesis, regulation of meiotic cell cycle, regulation of mitotic cell cycle	WBGene00003804	npp-18	meiotic chromosome segregation
FBgn0037342	CG2931	nuclear mRNA splicing, via spliceosome, neurogenesis	WBGene00021901	tag-262	reproduction, reproduction
FBgn0040208	Kat60	microtubule severing, microtubule severing, microtubule-based process, plus-end specific microtubule depolymerization, mitotic anaphase A, microtubule severing, mitotic sister chromatid segregation, bristle development, wing disc development, wing disc development, microtubule severing, cytoplasmic microtubule organization, microtubule depolymerization, negative regulation of cell migration	WBGene00003183	mei-1	embryo development ending in birth or egg hatching, meiosis, embryo development ending in birth or egg hatching, embryo development ending in birth or egg hatching, cell division, cytokinesis, embryo development ending in birth or egg hatching, embryo development ending in birth or egg hatching, embryo development ending in birth or egg hatching, cytokinesis, embryo development ending in birth or…
FBgn0037363	CG1347		WBGene00013340	tcc-1
FBgn0029819	CG3016	ubiquitin-dependent protein catabolic process	WBGene00022052	Y67D2.2	ubiquitin-dependent protein catabolic process, embryo development ending in birth or egg hatching, nematode larval development
FBgn0260817	gkt	DNA repair, establishment or maintenance of epithelial cell apical/basal polarity, central nervous system development	WBGene00018678	F52C12.1	DNA repair
FBgn0051953	CR31953	DNA repair	WBGene00018678	F52C12.1	DNA repair
FBgn0037141	DNApol-eta	translesion synthesis, translesion synthesis, translesion synthesis, double-strand break repair via homologous recombination	WBGene00018721	polh-1	DNA repair, DNA repair
FBgn0011703	RnrL	DNA replication, DNA replication, oxidation-reduction process, activation of caspase activity, tissue regeneration	WBGene00004391	rnr-1	DNA replication, DNA replication, DNA replication, oxidation-reduction process, oxidation-reduction process, oxidation-reduction process, oxidation-reduction process, embryo development ending in birth or egg hatching, embryo development ending in birth or egg hatching, embryo development ending in birth or egg hatching, reproduction, embryo development ending in birth or egg hatching, reproducti…
FBgn0030092	fh	cellular iron ion homeostasis, cellular iron ion homeostasis, cellular iron ion homeostasis, iron-sulfur cluster assembly, oxidation-reduction process, response to hydrogen peroxide, axon transport of mitochondrion, regulation of mitochondrial membrane potential	WBGene00001486	frh-1	iron-sulfur cluster assembly, oxidation-reduction process, positive regulation of growth rate, embryo development ending in birth or egg hatching, locomotion, positive regulation of growth rate, positive regulation of growth rate, embryo development ending in birth or egg hatching, determination of adult lifespan, response to stress, positive regulation of multicellular organism growth, determina…
FBgn0029094	asf1	nucleosome assembly, chromatin organization, chromatin organization, regulation of nuclear mRNA splicing, via spliceosome, muscle organ development, dendrite morphogenesis	WBGene00007277	asfl-1	chromatin assembly or disassembly
FBgn0028683	spt4	non-covalent chromatin modification, positive regulation of transcription elongation, DNA-dependent	WBGene00005014	spt-4	regulation of transcription, DNA-dependent, positive regulation of transcription elongation, DNA-dependent, determination of adult lifespan
FBgn0028343	l(1)G0222	cell morphogenesis, neurogenesis	WBGene00021945	lem-4	embryo development ending in birth or egg hatching, mitotic nuclear envelope reassembly, mitotic nuclear envelope reassembly
FBgn0031540	CG3238		WBGene00004028	pif-1
FBgn0001225	Hsp26	response to heat, response to heat, determination of adult lifespan, cold acclimation	WBGene00004798	sip-1	determination of adult lifespan, determination of adult lifespan, determination of adult lifespan
FBgn0030096	Zpr1	transcription from RNA polymerase I promoter, lumen formation, open tracheal system, terminal branching, open tracheal system	WBGene00020999	W03F9.1
FBgn0011762	DNApol-alpha50	DNA replication, DNA replication, DNA replication, synthesis of RNA primer, DNA replication, DNA replication, synthesis of RNA primer, neurogenesis	WBGene00004180	pri-1	DNA replication, synthesis of RNA primer, DNA replication, synthesis of RNA primer, embryo development ending in birth or egg hatching, embryo development ending in birth or egg hatching, embryo development ending in birth or egg hatching, cell division, cytokinesis, embryo development ending in birth or egg hatching, embryo development ending in birth or egg hatching, growth, nematode larval dev…
FBgn0051957	CG31957	translational initiation	WBGene00014112	ZK856.11	translational initiation, translational initiation, positive regulation of growth rate, reproduction, growth, nematode larval development, embryo development ending in birth or egg hatching, reproduction, receptor-mediated endocytosis, growth, nematode larval development, reproduction, growth, nematode larval development
FBgn0035987	CG3689	mRNA cleavage, mRNA cleavage, mRNA polyadenylation	WBGene00009668	cfim-1	mRNA polyadenylation, embryo development ending in birth or egg hatching, reproduction, RNA interference, embryo development ending in birth or egg hatching, embryo development ending in birth or egg hatching, embryo development ending in birth or egg hatching, reproduction, reproduction, hermaphrodite genitalia development, locomotion, locomotion, embryo development ending in birth or egg hatchi…
FBgn0038917	CG6678		WBGene00010768	K11D2.1
FBgn0032863	cdc23	mitotic anaphase, phagocytosis, engulfment, positive regulation of mitotic metaphase/anaphase transition, endomitotic cell cycle, neurogenesis	WBGene00003134	mat-3	regulation of mitotic metaphase/anaphase transition, reproduction, meiosis, reproduction, meiosis, embryo development ending in birth or egg hatching, body morphogenesis, embryo development ending in birth or egg hatching, embryo development ending in birth or egg hatching, embryo development ending in birth or egg hatching, hermaphrodite genitalia development, reproduction, embryo development en…
FBgn0051687	CG31687	cell cycle, regulation of mitotic metaphase/anaphase transition, regulation of establishment of planar polarity	WBGene00003134	mat-3	regulation of mitotic metaphase/anaphase transition, reproduction, meiosis, reproduction, meiosis, embryo development ending in birth or egg hatching, body morphogenesis, embryo development ending in birth or egg hatching, embryo development ending in birth or egg hatching, embryo development ending in birth or egg hatching, hermaphrodite genitalia development, reproduction, embryo development en…
FBgn0028688	Rpn7	proteolysis, proteolysis, proteolysis, proteolysis, proteasomal ubiquitin-dependent protein catabolic process, cellular process, neurogenesis	WBGene00004463	rpn-7	embryo development ending in birth or egg hatching, reproduction, reproduction, embryo development ending in birth or egg hatching, reproduction, reproduction, embryo development ending in birth or egg hatching, embryo development ending in birth or egg hatching, reproduction, nematode larval development, embryo development ending in birth or egg hatching, molting cycle, collagen and cuticulin-ba…
FBgn0039664	CG2006		WBGene00175030	Y53C12A.10
FBgn0034073	CG8414		WBGene00010709	nol-9	positive regulation of growth rate, reproduction, positive regulation of growth rate, response to DNA damage stimulus
FBgn0015562	veg		WBGene00020375	T09B4.1	GPI anchor biosynthetic process, embryo development ending in birth or egg hatching, reproduction, embryo development ending in birth or egg hatching, reproduction, hermaphrodite genitalia development, reproduction, hermaphrodite genitalia development, reproduction, hermaphrodite genitalia development, growth, nematode larval development, reproduction, hermaphrodite genitalia development, reprodu…
FBgn0035675	CG6610	nuclear mRNA splicing, via spliceosome, nuclear mRNA splicing, via spliceosome	WBGene00003079	lsm-5	embryo development ending in birth or egg hatching, embryo development ending in birth or egg hatching, regulation of cell proliferation, regulation of meiosis, regulation of cell proliferation, regulation of meiosis, embryo development ending in birth or egg hatching, reproduction, embryo development ending in birth or egg hatching, apoptosis, reproduction
FBgn0027338	Kap-alpha3	protein import into nucleus, protein import into nucleus, protein import into nucleus, protein import into nucleus, positive regulation of NFAT protein import into nucleus, response to UV, mitotic cell cycle G2/M transition DNA damage checkpoint	WBGene00002074	ima-3	protein import into nucleus, protein import into nucleus, embryo development ending in birth or egg hatching, reproduction, embryo development ending in birth or egg hatching, growth, nematode larval development, locomotion, embryo development ending in birth or egg hatching, embryo development ending in birth or egg hatching, RNA interference, reproduction, oogenesis, gamete generation, meiosis,…
FBgn0033183	CG1620		WBGene00020320	T07F8.4	body morphogenesis, reproduction, reproduction
FBgn0033183	CG1620		WBGene00017352	F10E7.11
FBgn0027948	msps	microtubule-based process, female meiosis, pronuclear fusion, mitosis, female meiosis, cytoplasmic microtubule organization, oocyte microtubule cytoskeleton organization, bicoid mRNA localization, cytoplasmic microtubule organization, mitotic spindle elongation, mitotic spindle elongation, positive regulation of microtubule nucleation, mitosis, endoplasmic reticulum organization, oogenesis, cytop…	WBGene00018781	F54A3.2
FBgn0026015	Top3beta	DNA catabolic process, endonucleolytic, DNA topological change	WBGene00012995	Y48C3A.14	DNA topological change, DNA topological change, DNA topological change, DNA topological change, DNA topological change, DNA topological change
FBgn0031640	CG11926		WBGene00018321	sand-1	embryo development ending in birth or egg hatching, body morphogenesis, locomotion, early endosome to late endosome transport, embryo development ending in birth or egg hatching, nematode larval development, body morphogenesis, positive regulation of locomotion, regulation of protein localization, phagosome maturation involved in apoptotic cell clearance
FBgn0052104	CG32104		WBGene00004824	F56B3.4	ubiquitin-dependent protein catabolic process, positive regulation of growth rate, morphogenesis of an epithelium, locomotion, hermaphrodite genitalia development, morphogenesis of an epithelium, locomotion, hermaphrodite genitalia development, reproduction, receptor-mediated endocytosis, morphogenesis of an epithelium, morphogenesis of an epithelium, morphogenesis of an epithelium
FBgn0034081	CG10731	proton transport	WBGene00050937	R02D5.8
FBgn0016641	PTP-ER	R7 cell fate commitment, R7 cell fate commitment, R7 cell fate commitment, protein dephosphorylation, Ras protein signal transduction, Ras protein signal transduction, Ras protein signal transduction, protein dephosphorylation, inactivation of MAPK activity, protein dephosphorylation, mitotic cell cycle	WBGene00020652	egg-4	protein dephosphorylation, reproduction, embryo development ending in birth or egg hatching, reproduction, embryo development ending in birth or egg hatching, reproduction, reproduction, reproduction, growth, nematode larval development, reproduction, embryo development ending in birth or egg hatching, reproduction, reproduction, reproduction, reproduction, reproduction, oogenesis, reproduction, …
FBgn0035754	MED4	transcription initiation from RNA polymerase II promoter, transcription from RNA polymerase II promoter, regulation of transcription from RNA polymerase II promoter, muscle organ development, dendrite morphogenesis, mitotic cell cycle G2/M transition DNA damage checkpoint	WBGene00007012	mdt-4	regulation of transcription from RNA polymerase II promoter, morphogenesis of an epithelium, oviposition, embryo development ending in birth or egg hatching
FBgn0030817	CG4991	amino acid transmembrane transport	WBGene00010307	F59B2.2
FBgn0034032	CG8195		WBGene00015009	B0041.5	lipid storage, axon guidance, axonal fasciculation, regulation of peptide transport, regulation of lipid storage
FBgn0038168	omd	snRNA 3'-end processing, neurogenesis	WBGene00013075	Y51A2D.7	embryo development ending in birth or egg hatching, positive regulation of growth rate, embryo development ending in birth or egg hatching, locomotion, reproduction, embryo development ending in birth or egg hatching, growth, nematode larval development, reproduction, hermaphrodite genitalia development, reproduction, hermaphrodite genitalia development, reproduction, hermaphrodite genitalia deve…
FBgn0036648	CG4098		WBGene00003583	ndx-6
FBgn0036398	CG9007	oogenesis, regulation of transcription by chromatin organization	WBGene00022203	Y73B3A.1	determination of adult lifespan
FBgn0036398	CG9007	oogenesis, regulation of transcription by chromatin organization	WBGene00017482	set-9	response to DNA damage stimulus, determination of adult lifespan, determination of adult lifespan, determination of adult lifespan, determination of adult lifespan, determination of adult lifespan, determination of adult lifespan, determination of adult lifespan, determination of adult lifespan, determination of adult lifespan, determination of adult lifespan, determination of adult lifespan, det…
FBgn0015075	Ddx1	regulation of translational initiation, ribosome biogenesis, embryonic development via the syncytial blastoderm, spliceosome assembly	WBGene00021938	Y55F3BR.1	positive regulation of growth rate, reproduction, positive regulation of growth rate, locomotion, reproduction, positive regulation of growth rate, reproduction
FBgn0015075	Ddx1	regulation of translational initiation, ribosome biogenesis, embryonic development via the syncytial blastoderm, spliceosome assembly	WBGene00017620	F20A1.9	embryo development ending in birth or egg hatching
FBgn0004837	Su(H)	Notch signaling pathway, Notch signaling pathway, positive regulation of transcription from RNA polymerase II promoter, sensory organ precursor cell fate determination, Notch signaling pathway, positive regulation of transcription from RNA polymerase II promoter, Notch signaling pathway, Notch signaling pathway, dorsal/ventral lineage restriction, imaginal disc, lateral inhibition, crystal cell d…	WBGene00002245	lag-1	regulation of transcription, DNA-dependent, regulation of transcription, DNA-dependent, regulation of transcription, DNA-dependent, embryo development ending in birth or egg hatching, collagen and cuticulin-based cuticle development, embryo development ending in birth or egg hatching, nematode larval development, molting cycle, collagen and cuticulin-based cuticle, vulval development, cell divisi…
FBgn0036038	defl	snRNA processing, snRNA 3'-end processing, snRNA processing	WBGene00008361	D1043.1	embryo development ending in birth or egg hatching, body morphogenesis, locomotion, embryo development ending in birth or egg hatching, growth, nematode larval development, locomotion, embryo development ending in birth or egg hatching, receptor-mediated endocytosis
FBgn0029887	CG3198	nuclear mRNA splicing, via spliceosome, nuclear mRNA splicing, via spliceosome	WBGene00016811	C50D2.8
FBgn0029121	Sras	proteolysis	WBGene00001406	fce-2	CAAX-box protein processing
FBgn0016697	Prosalpha5	ubiquitin-dependent protein catabolic process, proteolysis, proteasomal ubiquitin-dependent protein catabolic process, ubiquitin-dependent protein catabolic process, cellular process	WBGene00003926	pas-5	ubiquitin-dependent protein catabolic process, proteolysis involved in cellular protein catabolic process, embryo development ending in birth or egg hatching, nematode larval development, locomotion, embryo development ending in birth or egg hatching, growth, nematode larval development, locomotion, reproduction, embryo development ending in birth or egg hatching, growth, nematode larval developm…
FBgn0037263	slx1	DNA repair, mitotic cell cycle G2/M transition DNA damage checkpoint	WBGene00018909	slx-1	embryo development ending in birth or egg hatching, growth, nematode larval development
FBgn0053505	U3-55K	rRNA processing, neurogenesis	WBGene00020171	T02H6.1
FBgn0036255	Atg12	autophagy, autophagic cell death, salivary gland cell autophagic cell death, autophagic vacuole assembly, macroautophagy, autophagy	WBGene00002982	lgg-3	autophagic vacuole assembly, determination of adult lifespan, determination of adult lifespan, striated muscle myosin thick filament assembly, necrotic cell death, determination of adult lifespan, determination of adult lifespan
FBgn0025830	IntS8	snRNA 3'-end processing, snRNA processing	WBGene00013021	Y48G10A.4	embryo development ending in birth or egg hatching, embryo development, gastrulation with mouth forming first, embryo development ending in birth or egg hatching, embryo development ending in birth or egg hatching, growth, nematode larval development, locomotion, reproduction, embryo development ending in birth or egg hatching, growth, nematode larval development, locomotion, embryo development e…
FBgn0027084	Aats-lys	lysyl-tRNA aminoacylation, lysyl-tRNA aminoacylation	WBGene00002238	kars-1	lysyl-tRNA aminoacylation, lysyl-tRNA aminoacylation, tRNA aminoacylation for protein translation, tRNA aminoacylation for protein translation, positive regulation of growth rate, embryo development ending in birth or egg hatching, positive regulation of multicellular organism growth, body morphogenesis, reproduction, embryo development ending in birth or egg hatching, growth, nematode larval dev…
FBgn0010382	CycE	peripheral nervous system development, G1/S transition of mitotic cell cycle, pole cell development, regulation of protein phosphorylation, eggshell chorion gene amplification, G1/S transition of mitotic cell cycle, peripheral nervous system development, oogenesis, JAK-STAT cascade, sensory organ development, G1/S transition of mitotic cell cycle, cell adhesion, cell cycle, regulation of cell sha…	WBGene00000871	cye-1	regulation of cyclin-dependent protein kinase activity, regulation of cell cycle, embryo development ending in birth or egg hatching, embryo development ending in birth or egg hatching, growth, nematode larval development, reproduction, cell division, cytokinesis, embryo development ending in birth or egg hatching, embryo development ending in birth or egg hatching, growth, nematode larval develo…
FBgn0061515	endos	oogenesis, response to nutrient, oogenesis, water homeostasis, mitotic spindle organization, regulation of meiotic cell cycle, negative regulation of protein dephosphorylation, regulation of mitosis	WBGene00010730	ensa-1
FBgn0032596	CG17331	multicellular organism reproduction, proteasomal ubiquitin-dependent protein catabolic process, proteolysis involved in cellular protein catabolic process, cellular process, response to DNA damage stimulus	WBGene00003950	pbs-4	proteolysis involved in cellular protein catabolic process, embryo development ending in birth or egg hatching, embryo development ending in birth or egg hatching, reproduction, embryo development ending in birth or egg hatching, embryo development ending in birth or egg hatching, reproduction, embryo development ending in birth or egg hatching, embryo development ending in birth or egg hatching,…
FBgn0028470	Patr-1	cytoplasmic mRNA processing body assembly	WBGene00009661	patr-1	embryo development ending in birth or egg hatching, nematode larval development, growth, nematode larval development, reproduction, embryo development ending in birth or egg hatching, growth, nematode larval development
FBgn0036897	CG8786	protein ubiquitination involved in ubiquitin-dependent protein catabolic process, protein destabilization	WBGene00013674	Y105E8A.14
FBgn0036897	CG8786	protein ubiquitination involved in ubiquitin-dependent protein catabolic process, protein destabilization	WBGene00008330	C55A6.1
FBgn0028687	Rpt1	proteolysis, proteolysis, proteolysis, proteasomal ubiquitin-dependent protein catabolic process, protein catabolic process, cellular process, response to DNA damage stimulus	WBGene00004501	rpt-1	protein catabolic process, embryo development ending in birth or egg hatching, reproduction, reproduction, embryo development ending in birth or egg hatching, nematode larval development, embryo development ending in birth or egg hatching, determination of adult lifespan, determination of adult lifespan, determination of adult lifespan, reproduction
FBgn0035951	CG5068		WBGene00007188	B0464.9	embryo development ending in birth or egg hatching, reproduction, embryo development ending in birth or egg hatching, growth, nematode larval development, determination of adult lifespan
FBgn0027537	CG11092	nuclear pore organization, SMAD protein import into nucleus, cellular protein localization, NLS-bearing substrate import into nucleus	WBGene00003799	npp-13	transport, embryo development ending in birth or egg hatching, embryo development ending in birth or egg hatching, embryo development ending in birth or egg hatching, nucleus organization, establishment of mitotic spindle orientation
FBgn0039302	Nup358	NLS-bearing substrate import into nucleus, SMAD protein import into nucleus, protein import into nucleus	WBGene00003795	npp-9	intracellular transport, embryo development ending in birth or egg hatching, embryo development ending in birth or egg hatching, embryo development ending in birth or egg hatching, hermaphrodite genitalia development, embryo development ending in birth or egg hatching, collagen and cuticulin-based cuticle development, reproduction, hermaphrodite genitalia development, embryo development ending in…
FBgn0035421	CG12034	sphingomyelin metabolic process	WBGene00012105	T27F6.6
FBgn0067629	CG33332	biological_process	WBGene00009145	F26A3.7
FBgn0037156	CG11523		WBGene00020782	T24H7.3	embryo development ending in birth or egg hatching
FBgn0015279	Pi3K92E	phosphatidylinositol phosphorylation, positive regulation of organ growth, positive regulation of imaginal disc growth, phosphatidylinositol phosphorylation, regulation of cell proliferation, regulation of cell size, positive regulation of organ growth, positive regulation of growth, phosphatidylinositol phosphorylation, positive regulation of cell size, positive regulation of organ growth, phosp…	WBGene00000090	age-1	phosphatidylinositol phosphorylation, phosphatidylinositol-mediated signaling, determination of adult lifespan, determination of adult lifespan, determination of adult lifespan, determination of adult lifespan, determination of adult lifespan, dauer entry, determination of adult lifespan, reproduction, embryo development ending in birth or egg hatching, learning or memory, regulation of chemotaxi…
FBgn0038145	Droj2	response to heat, protein folding, neurogenesis	WBGene00001030	dnj-12	protein folding, protein folding, embryo development ending in birth or egg hatching, mitotic spindle organization, embryo development ending in birth or egg hatching, determination of adult lifespan
FBgn0260397	Su(var)3-3	regulation of transcription, DNA-dependent, oxidation-reduction process, histone H3-K4 demethylation, chromatin organization, oogenesis, gene silencing, histone H3-K4 demethylation, oogenesis, regulation of Notch signaling pathway, histone H3-K4 demethylation, imaginal disc-derived wing vein specification, heterochromatin organization, imaginal disc-derived wing vein specification	WBGene00005010	spr-5	histone H3-K4 demethylation, oxidation-reduction process, regulation of transcription, DNA-dependent, apoptosis, apoptosis, determination of adult lifespan, histone H3-K4 demethylation, histone H3-K4 demethylation
FBgn0260397	Su(var)3-3	regulation of transcription, DNA-dependent, oxidation-reduction process, histone H3-K4 demethylation, chromatin organization, oogenesis, gene silencing, histone H3-K4 demethylation, oogenesis, regulation of Notch signaling pathway, histone H3-K4 demethylation, imaginal disc-derived wing vein specification, heterochromatin organization, imaginal disc-derived wing vein specification	WBGene00011615	lsd-1	oxidation-reduction process, regulation of transcription, DNA-dependent, histone H3-K4 demethylation, apoptosis, apoptosis, determination of adult lifespan
FBgn0041585	olf186-F	positive regulation of NFAT protein import into nucleus, positive regulation of calcium ion transport, store-operated calcium entry, nervous system development, positive regulation of NFAT protein import into nucleus, store-operated calcium entry, store-operated calcium entry	WBGene00015648	orai-1	reproduction, reproduction, apoptosis, reproduction, store-operated calcium entry, ovulation, store-operated calcium entry
FBgn0026373	RpII33	transcription from RNA polymerase II promoter, transcription from RNA polymerase II promoter, cellular response to heat	WBGene00007971	rpb-3	transcription, DNA-dependent, transcription, DNA-dependent, transcription, DNA-dependent, transcription, DNA-dependent, positive regulation of growth rate, embryo development ending in birth or egg hatching, embryo development, gastrulation with mouth forming first, embryo development ending in birth or egg hatching, embryo development ending in birth or egg hatching, growth, nematode larval deve…
FBgn0023174	Prosbeta2	proteasomal ubiquitin-dependent protein catabolic process, proteolysis involved in cellular protein catabolic process, response to DNA damage stimulus	WBGene00003948	pbs-2	proteolysis involved in cellular protein catabolic process, proteolysis involved in cellular protein catabolic process, embryo development ending in birth or egg hatching, locomotion, embryo development ending in birth or egg hatching, growth, nematode larval development, locomotion, reproduction, embryo development ending in birth or egg hatching, growth, nematode larval development, locomotion,…
FBgn0034310	Nup75	mRNA export from nucleus, SMAD protein import into nucleus, NLS-bearing substrate import into nucleus	WBGene00003788	npp-2	positive regulation of growth rate, embryo development ending in birth or egg hatching, nucleus organization, embryo development ending in birth or egg hatching, embryo development ending in birth or egg hatching, reproduction, positive regulation of growth rate, locomotion, positive regulation of locomotion, embryo development ending in birth or egg hatching, oviposition, locomotion, hermaphrodi…
FBgn0086443	Aats-asn	asparaginyl-tRNA aminoacylation, asparaginyl-tRNA aminoacylation	WBGene00003815	nars-1	tRNA aminoacylation for protein translation, tRNA aminoacylation for protein translation, tRNA aminoacylation for protein translation, asparaginyl-tRNA aminoacylation, reproduction, embryo development ending in birth or egg hatching, growth, nematode larval development, reproduction, growth, nematode larval development, reproduction, embryo development ending in birth or egg hatching, growth, nem…
FBgn0041004	CG17715		WBGene00044325	tag-321
FBgn0031094	CG9578		WBGene00022803	ZK688.9	locomotion, oviposition
FBgn0011659	Mlh1	mismatch repair, mismatch repair, mismatch repair, reciprocal meiotic recombination	WBGene00003373	mlh-1	mismatch repair, mismatch repair, mismatch repair, mismatch repair, response to DNA damage stimulus
FBgn0026778	Rad1	DNA repair, DNA repair, DNA damage checkpoint	WBGene00003417	mrt-2	DNA damage checkpoint, DNA repair, DNA repair, response to DNA damage stimulus, meiotic chromosome segregation, meiotic chromosome segregation, DNA damage checkpoint, telomere maintenance, DNA damage response, signal transduction resulting in induction of apoptosis, telomere maintenance via telomerase, nucleotide-excision repair
FBgn0050499	CG30499	pentose-phosphate shunt	WBGene00017272	F08F8.7	carbohydrate metabolic process, metabolic process, pentose-phosphate shunt
FBgn0036239	Pop2	regulation of transcription from RNA polymerase II promoter, muscle organ development, neuron development, nuclear-transcribed mRNA poly(A) tail shortening, nuclear-transcribed mRNA poly(A) tail shortening, mitotic cell cycle G2/M transition DNA damage checkpoint, neurogenesis	WBGene00000369	ccf-1	embryo development ending in birth or egg hatching, reproduction, embryo development ending in birth or egg hatching, embryo development ending in birth or egg hatching, reproduction, embryo development ending in birth or egg hatching, embryo development ending in birth or egg hatching, embryo development ending in birth or egg hatching, embryo development ending in birth or egg hatching, nematod…
FBgn0030431	CG4407	metabolic process	WBGene00011271	flad-1	Mo-molybdopterin cofactor biosynthetic process, metabolic process, FAD biosynthetic process, positive regulation of growth rate, positive regulation of growth rate
FBgn0011768	Fdh	alcohol metabolic process, ethanol oxidation, regulation of nitric oxide metabolic process, visual learning, regulation of peptidyl-cysteine S-nitrosylation	WBGene00019240	H24K24.3	oxidation-reduction process, oxidation-reduction process, oxidation-reduction process, oxidation-reduction process, ethanol oxidation
FBgn0038429	CG14882	biological_process, oxidation-reduction process	WBGene00006510	mtrr-1	oxidation-reduction process, oxidation-reduction process, oxidation-reduction process, oxidation-reduction process, oxidation-reduction process, oxidation-reduction process
FBgn0261976	Psf2	DNA strand elongation involved in DNA replication, neurogenesis, lateral inhibition, chromosome condensation	WBGene00009287	F31C3.5	DNA replication, embryo development ending in birth or egg hatching, body morphogenesis, locomotion, embryo development, gastrulation with mouth forming first, embryo development ending in birth or egg hatching, growth, nematode larval development, hermaphrodite genitalia development, embryo development ending in birth or egg hatching, growth, nematode larval development, hermaphrodite genitalia …
FBgn0034269	CG6406		WBGene00017037	D1069.3	positive regulation of growth rate, locomotion, locomotion, hermaphrodite genitalia development, reproduction, positive regulation of growth rate, nematode larval development, locomotion, hermaphrodite genitalia development, reproduction, inductive cell migration, determination of adult lifespan
FBgn0014340	mof	dosage compensation, dosage compensation, dosage compensation, by hyperactivation of X chromosome, histone acetylation, dosage compensation, dosage compensation, by hyperactivation of X chromosome, histone acetylation, peptidyl-lysine acetylation, histone acetylation, regulation of transcription, DNA-dependent, histone H4-K16 acetylation	WBGene00010537	mys-2	regulation of transcription, DNA-dependent, cell fate specification, cell fate specification, cell fate specification, protein localization to chromatin
FBgn0039585	CG1894	regulation of transcription, DNA-dependent	WBGene00010537	mys-2	regulation of transcription, DNA-dependent, cell fate specification, cell fate specification, cell fate specification, protein localization to chromatin
FBgn0024332	Mcm3	pre-replicative complex assembly, pre-replicative complex assembly, DNA-dependent DNA replication initiation, mitotic cell cycle G2/M transition DNA damage checkpoint, neurogenesis	WBGene00003155	mcm-3	DNA replication, DNA-dependent DNA replication initiation, embryo development ending in birth or egg hatching, cell division, cytokinesis, reproduction, hermaphrodite genitalia development, embryo development ending in birth or egg hatching, embryo development ending in birth or egg hatching
FBgn0259152	Clbn	protein export from nucleus	WBGene00022350	Y82E9BR.18
FBgn0023175	Prosalpha7	proteasomal ubiquitin-dependent protein catabolic process, ubiquitin-dependent protein catabolic process, response to DNA damage stimulus	WBGene00003928	pas-7	ubiquitin-dependent protein catabolic process, proteolysis involved in cellular protein catabolic process, embryo development ending in birth or egg hatching, nematode larval development, embryo development ending in birth or egg hatching, embryo development ending in birth or egg hatching, reproduction, molting cycle, collagen and cuticulin-based cuticle
FBgn0010877	l(3)05822	biological_process	WBGene00015128	B0303.7
FBgn0031419	CG15390		WBGene00010771	K11D2.5	protein secretion
FBgn0067628	CG33331	biological_process	WBGene00022126	Y71F9B.2
FBgn0027091	Aats-cys	cysteinyl-tRNA aminoacylation, cysteinyl-tRNA aminoacylation	WBGene00000800	cars-1	tRNA aminoacylation for protein translation, cysteinyl-tRNA aminoacylation, positive regulation of growth rate, embryo development ending in birth or egg hatching, nematode larval development, molting cycle, collagen and cuticulin-based cuticle, growth, nematode larval development, growth, nematode larval development, embryo development ending in birth or egg hatching, molting cycle, collagen and…
FBgn0003557	Su(dx)	imaginal disc-derived wing margin morphogenesis, imaginal disc-derived wing margin morphogenesis, imaginal disc-derived wing vein morphogenesis, imaginal disc-derived wing vein morphogenesis, imaginal disc-derived wing vein morphogenesis, Notch signaling pathway, imaginal disc-derived leg joint morphogenesis, negative regulation of Notch signaling pathway, receptor internalization, regulation of …	WBGene00007009	wwp-1	protein modification process, lipid storage, lipid storage, lipid storage, lipid storage, embryo development ending in birth or egg hatching, embryo development ending in birth or egg hatching, embryo development ending in birth or egg hatching, axonal fasciculation, locomotion, determination of adult lifespan, embryo development ending in birth or egg hatching, dendrite development, regulation o…
FBgn0025684	MFS18	transmembrane transport	WBGene00010758	vnut-1	transmembrane transport
FBgn0013531	MED20	transcription initiation from RNA polymerase II promoter, regulation of transcription from RNA polymerase II promoter, transcription, DNA-dependent, transcription, DNA-dependent	WBGene00007020	mdt-20	regulation of transcription from RNA polymerase II promoter
FBgn0031633	CG2976	protein prenylation	WBGene00019823	fnta-1	protein prenylation, embryo development ending in birth or egg hatching, body morphogenesis, oviposition, hermaphrodite genitalia development, morphogenesis of an epithelium, locomotion, hermaphrodite genitalia development, embryo development ending in birth or egg hatching, reproduction, embryo development ending in birth or egg hatching, nematode larval development, growth, nematode larval deve…
FBgn0004406	tam	DNA-dependent DNA replication, DNA-dependent DNA replication, mitochondrial DNA replication, DNA-dependent DNA replication, eclosion, determination of adult lifespan, DNA-dependent DNA replication	WBGene00013258	polg-1	DNA replication, DNA replication, mitochondrial DNA replication, mitochondrion organization, defecation, gonad development, determination of adult lifespan
FBgn0031308	CG4749		WBGene00021476	Y39G10AR.21
FBgn0038013	CG10038	biological_process	WBGene00013561	Y75B8A.31
FBgn0034304	CG5742	neurogenesis	WBGene00015301	C01F1.6
FBgn0016698	Ptpa	regulation of catalytic activity	WBGene00022185	Y71H2AM.20	positive regulation of growth rate, reproduction, embryo development ending in birth or egg hatching, growth, nematode larval development, determination of adult lifespan
FBgn0031536	Cog3	intracellular protein transport, dsRNA transport, neurogenesis	WBGene00022121	cogc-3	intracellular protein transport, morphogenesis of an epithelium, hermaphrodite genitalia development, embryo development ending in birth or egg hatching, embryo development ending in birth or egg hatching, positive regulation of multicellular organism growth, growth, nematode larval development, locomotion, growth, nematode larval development, locomotion, inductive cell migration, inductive cell …
FBgn0040477	cid	chromatin assembly or disassembly, kinetochore organization, nucleosome assembly, mitotic metaphase plate congression, chromosome segregation, mitotic spindle elongation, mitotic spindle organization, kinetochore assembly, spindle assembly, mitosis, neurogenesis	WBGene00001831	hcp-3	nucleosome assembly, embryo development ending in birth or egg hatching, embryo development ending in birth or egg hatching, embryo development ending in birth or egg hatching, embryo development ending in birth or egg hatching, reproduction, embryo development ending in birth or egg hatching, embryo development ending in birth or egg hatching, embryo development ending in birth or egg hatching, …
FBgn0030606			WBGene00010670	K08E4.6	transport
FBgn0037603	CG11753		WBGene00020193	T03F1.12
FBgn0031309	Tfb4	promoter clearance from RNA polymerase II promoter, transcription from RNA polymerase II promoter, transcription initiation from RNA polymerase II promoter, transcription initiation from RNA polymerase II promoter, nucleotide-excision repair, response to UV, transcriptional open complex formation at RNA polymerase II promoter, regulation of transcription, DNA-dependent	WBGene00014230	ZK1128.4	nucleotide-excision repair, regulation of transcription, DNA-dependent, embryo development ending in birth or egg hatching, positive regulation of growth rate, embryo development ending in birth or egg hatching, reproduction, embryo development ending in birth or egg hatching
FBgn0030053	CG12081		WBGene00009978	F53E4.1	reproduction
FBgn0005655	mus209	mismatch repair, DNA-dependent DNA replication, nucleotide-excision repair, leading strand elongation, mitotic spindle organization, DNA replication, eggshell chorion gene amplification, DNA replication, regulation of DNA replication, antimicrobial humoral response, neurogenesis	WBGene00003955	pcn-1	regulation of DNA replication, regulation of DNA replication, regulation of DNA replication, embryo development ending in birth or egg hatching, reproduction, cell division, cytokinesis, embryo development ending in birth or egg hatching, oogenesis, reproduction, apoptosis
FBgn0031061	CG14232	transport	WBGene00012765	Y41E3.7	transport
FBgn0030342	CG10347		WBGene00016654	C44E4.5	lipid storage
FBgn0259676	DNApol-alpha60	DNA replication, DNA replication, DNA-dependent DNA replication, DNA replication, mitotic cell cycle, DNA replication, synthesis of RNA primer	WBGene00004181	pri-2	DNA replication, synthesis of RNA primer, embryo development ending in birth or egg hatching, hermaphrodite genitalia development, nucleus organization, embryo development ending in birth or egg hatching, embryo development ending in birth or egg hatching, cell division, cytokinesis, embryo development ending in birth or egg hatching, embryo development ending in birth or egg hatching, reproducti…
FBgn0030646	CG9203	DNA repair	WBGene00011834	dvc-1	DNA repair, reproduction, reproduction, growth, nematode larval development, apoptosis, oogenesis
FBgn0033236	CG14764		WBGene00017708	F22E5.9
FBgn0031519	CG3326	microtubule severing, mitotic sister chromatid segregation, mitotic anaphase A	WBGene00017981	figl-1	ATP catabolic process, positive regulation of mitotic cell cycle, ATP catabolic process
FBgn0037144	CG7458	transmembrane transport	WBGene00022348	Y82E9BR.16	transmembrane transport, embryo development ending in birth or egg hatching, growth, nematode larval development
FBgn0037624	CG8223	biological_process	WBGene00008218	nasp-2	embryo development ending in birth or egg hatching, locomotion
FBgn0031188	CG14613		WBGene00013239	Y56A3A.22
FBgn0039966	Rab21	protein transport, small GTPase mediated signal transduction, cortical actin cytoskeleton organization	WBGene00004279	rab-21	small GTPase mediated signal transduction, small GTPase mediated signal transduction, protein transport, embryo development ending in birth or egg hatching
FBgn0010280	Taf4	transcription initiation from RNA polymerase II promoter, regulation of transcription, DNA-dependent, regulation of transcription, DNA-dependent, transcription initiation from RNA polymerase II promoter, transcription initiation from RNA polymerase II promoter, muscle organ development, dendrite morphogenesis, positive regulation of transcription from RNA polymerase II promoter, neurogenesis	WBGene00006385	taf-4	regulation of transcription, DNA-dependent, transcription initiation, DNA-dependent, positive regulation of growth rate, embryo development ending in birth or egg hatching, locomotion, reproduction, embryo development ending in birth or egg hatching, nematode larval development, growth, nematode larval development, embryo development ending in birth or egg hatching, protein phosphorylation, embry…
FBgn0261458	capt	bristle morphogenesis, oogenesis, compound eye development, actin polymerization or depolymerization, regulation of cell shape, oocyte microtubule cytoskeleton polarization, actin filament organization, actin filament organization, cell morphogenesis, wing disc dorsal/ventral pattern formation, actin filament organization, cell morphogenesis, muscle cell homeostasis, photoreceptor cell axon guida…	WBGene00015975	cas-2	cytoskeleton organization, cytoskeleton organization, cytoskeleton organization, cell morphogenesis
FBgn0038617	CG12333	lateral inhibition	WBGene00015470	C05D2.10
FBgn0030871	CG8142	DNA replication, cytoplasmic microtubule organization, lateral inhibition	WBGene00004340	rfc-4	embryo development ending in birth or egg hatching, embryo development ending in birth or egg hatching, embryo development ending in birth or egg hatching, reproduction, cell division, cytokinesis, positive regulation of growth rate, embryo development ending in birth or egg hatching, embryo development ending in birth or egg hatching, embryo development ending in birth or egg hatching, positive …
FBgn0037382	Hpr1	signal transduction, mRNA export from nucleus, mRNA export from nucleus in response to heat stress	WBGene00020172	thoc-1
FBgn0053936			WBGene00009050	F22D6.2
FBgn0033264	Nup50	phagocytosis, engulfment, SMAD protein import into nucleus, neurogenesis	WBGene00003802	npp-16	intracellular transport, RNA interference
FBgn0026238	gus	dorsal appendage formation, oocyte anterior/posterior axis specification, intracellular signal transduction	WBGene00021596	spsb-2
FBgn0043010	Fsn	negative regulation of synaptic growth at neuromuscular junction, neuromuscular synaptic transmission	WBGene00001499	fsn-1
FBgn0015282	Pros26.4	proteolysis, ubiquitin-dependent protein catabolic process, proteolysis, proteolysis, proteolysis, proteasomal ubiquitin-dependent protein catabolic process, protein catabolic process, cellular process, mitotic spindle organization, mitotic spindle elongation, cell proliferation, response to DNA damage stimulus	WBGene00004502	rpt-2	protein catabolic process, embryo development ending in birth or egg hatching, reproduction, embryo development ending in birth or egg hatching, embryo development ending in birth or egg hatching, determination of adult lifespan
FBgn0030607	dob	lipid metabolic process	WBGene00015484	C05D11.7	lipid metabolic process, metabolic process
FBgn0000173	ben	jump response, axonogenesis, grooming behavior, axon target recognition, photoreceptor cell morphogenesis, flight behavior, grooming behavior, protein ubiquitination, response to anesthetic	WBGene00006708	ubc-13	embryo development ending in birth or egg hatching, regulation of protein localization at cell surface
FBgn0023517	Pgam5	peptidyl-threonine dephosphorylation, response to anesthetic, positive regulation of mitochondrial fission, regulation of mitochondrion organization, regulation of mitochondrion organization, response to heat	WBGene00019941	pgam-5
FBgn0030802	CG9099	translational initiation	WBGene00012932	Y47D3A.21	translational initiation
FBgn0033762	CG8632	cation transport, transmembrane transport	WBGene00022174	Y71H2AM.9	cation transport, transmembrane transport
FBgn0250837	dUTPase	dUTP metabolic process	WBGene00010609	dut-1	dUTP metabolic process, dUTP metabolic process, reproduction, embryo development ending in birth or egg hatching, cell division, cytokinesis, reproduction, embryo development ending in birth or egg hatching, embryo development ending in birth or egg hatching, reproduction, embryo development ending in birth or egg hatching, apoptosis, apoptosis, apoptosis, apoptosis, autophagy, necrotic cell death
FBgn0024314	Plap	biological_process	WBGene00007333	ufd-3	embryo development ending in birth or egg hatching, positive regulation of growth rate
FBgn0037339	Pi4KIIalpha	phosphatidylinositol phosphorylation, secretory granule localization	WBGene00008346	C56A3.8	nematode larval development, reproduction, growth, nematode larval development, embryo development ending in birth or egg hatching, growth, nematode larval development, apoptosis
FBgn0050476	ave	signal transduction, epidermal growth factor receptor signaling pathway, compound eye photoreceptor cell differentiation, compound eye cone cell differentiation	WBGene00044341	ave-1
FBgn0027094	Aats-ala	alanyl-tRNA aminoacylation	WBGene00000197	aars-2	tRNA aminoacylation, alanyl-tRNA aminoacylation, alanyl-tRNA aminoacylation, positive regulation of growth rate, embryo development ending in birth or egg hatching, reproduction, embryo development ending in birth or egg hatching, reproduction, embryo development ending in birth or egg hatching, growth, nematode larval development, locomotion, growth, nematode larval development, embryo developme…
FBgn0011836	Taf2	transcription from RNA polymerase II promoter, regulation of transcription, DNA-dependent, transcription initiation from RNA polymerase II promoter, transcription initiation from RNA polymerase II promoter, positive regulation of JAK-STAT cascade, neurogenesis	WBGene00006383	taf-2	embryo development ending in birth or egg hatching, positive regulation of transcription from RNA polymerase II promoter, embryo development ending in birth or egg hatching
FBgn0040239	bc10	biological_process	WBGene00022273	Y73E7A.6
FBgn0031997	CG8455	biological_process	WBGene00015238	B0511.13	growth, nematode larval development, gamete generation
FBgn0030711	Rrp47	regulation of gene expression	WBGene00021785	Y51H7C.7
FBgn0051159	EF-G2	translational elongation	WBGene00022491	Y119D3B.14
FBgn0040346	CG3704		WBGene00001661	gop-2	embryo development ending in birth or egg hatching, embryo development ending in birth or egg hatching, positive regulation of growth rate, embryo development ending in birth or egg hatching, growth, nematode larval development, reproduction, embryo development ending in birth or egg hatching, positive regulation of growth rate, embryo development ending in birth or egg hatching, hermaphrodite ge…
FBgn0000146	aub	oogenesis, dorsal appendage formation, stem cell division, cystoblast division, regulation of oskar mRNA translation, oogenesis, positive regulation of oskar mRNA translation, regulation of translational initiation, pole cell formation, regulation of oskar mRNA translation, karyosome formation, maintenance of pole plasm mRNA location, oocyte maturation, targeting of mRNA for destruction involved …	WBGene00004178	prg-1	gonad development, germline cell cycle switching, mitotic to meiotic cell cycle, reproduction, positive regulation of mitosis, germ-line stem cell division, spermatogenesis, 21U-RNA metabolic process, germ-line stem cell division, gamete generation
FBgn0004872	piwi	female germ-line stem cell division, stem cell division, male germ-line stem cell division, germ-line stem cell maintenance, cell fate determination, germ-line stem cell division, posttranscriptional gene silencing, chromatin silencing, germ-line stem cell maintenance, germ-line stem cell division, RNA interference, chromatin silencing, negative regulation of transposition, DNA-mediated, chromati…	WBGene00004178	prg-1	gonad development, germline cell cycle switching, mitotic to meiotic cell cycle, reproduction, positive regulation of mitosis, germ-line stem cell division, spermatogenesis, 21U-RNA metabolic process, germ-line stem cell division, gamete generation
FBgn0027548	nito	nuclear mRNA splicing, via spliceosome, neurogenesis, compound eye development, positive regulation of Wnt receptor signaling pathway, wing disc pattern formation, positive regulation of Wnt receptor signaling pathway, positive regulation of Wnt receptor signaling pathway	WBGene00017929	grld-1
FBgn0036450	CG13472	mRNA processing, lateral inhibition	WBGene00021748	Y50D4C.3
FBgn0037893			WBGene00006889	pfd-3	protein folding, embryo development ending in birth or egg hatching, pronuclear migration, embryo development ending in birth or egg hatching, embryo development ending in birth or egg hatching, morphogenesis of an epithelium, embryo development ending in birth or egg hatching, hermaphrodite genitalia development, reproduction, embryo development ending in birth or egg hatching, receptor-mediated…
FBgn0011297	l(2)not		WBGene00010720	K09E4.2
FBgn0037368	CG1239	neurogenesis	WBGene00012469	Y17G7B.18	embryo development ending in birth or egg hatching, growth, nematode larval development, positive regulation of growth rate, locomotion, reproduction, embryo development ending in birth or egg hatching
FBgn0039125	CG5857	neurogenesis, nuclear pore complex assembly	WBGene00007118	npp-22	embryo development ending in birth or egg hatching, embryo development ending in birth or egg hatching
FBgn0038376	Hmt-1	heme transport, cadmium ion transmembrane transport, response to cadmium ion, detoxification of cadmium ion	WBGene00001815	hmt-1	transport, transport, transmembrane transport, transmembrane transport, response to cadmium ion, cadmium ion transmembrane transport, detoxification of cadmium ion, detoxification of copper ion, detoxification of copper ion
FBgn0051694	CG31694	positive regulation of JAK-STAT cascade	WBGene00010232	F58B3.6
FBgn0032924	Nbr		WBGene00003504	mut-7	nucleobase-containing compound metabolic process, growth, nematode larval development, RNA interference, RNA interference, embryo development ending in birth or egg hatching, RNA interference, negative regulation of transposition, DNA-mediated, gene silencing
FBgn0032924	Nbr		WBGene00013256	Y57A10A.13	nucleobase-containing compound metabolic process
FBgn0015925	csul	mitosis, pole plasm assembly, protein methylation, intracellular mRNA localization, pole plasm assembly, P granule organization, pole plasm protein localization, pole plasm assembly	WBGene00016408	prmt-5	protein methylation, protein methylation, response to DNA damage stimulus, DNA damage response, signal transduction resulting in induction of apoptosis, negative regulation of DNA damage response, signal transduction by p53 class mediator, histone arginine methylation, negative regulation of transcription, DNA-dependent
FBgn0030276	Dlic	microtubule-based movement, dendrite morphogenesis, dendrite morphogenesis, mitotic spindle organization, axon cargo transport, regulation of dendrite morphogenesis, microtubule cytoskeleton organization, oogenesis, dendrite morphogenesis, axonogenesis, mitosis	WBGene00001007	dli-1	morphogenesis of an epithelium, embryo development ending in birth or egg hatching, hermaphrodite genitalia development, negative regulation of vulval development, embryo development ending in birth or egg hatching, locomotion, hermaphrodite genitalia development, embryo development ending in birth or egg hatching, pronuclear migration, reproduction, reproduction, reproduction, receptor-mediated …
FBgn0031606	CG15439	lateral inhibition	WBGene00013339	phf-14
FBgn0025803			WBGene00011276	aakg-5	embryo development ending in birth or egg hatching, locomotion, hermaphrodite genitalia development, embryo development ending in birth or egg hatching, locomotion, hermaphrodite genitalia development
FBgn0028690	Rpn5	proteolysis, proteolysis, proteolysis, proteasomal ubiquitin-dependent protein catabolic process	WBGene00004461	rpn-5	embryo development ending in birth or egg hatching, embryo development ending in birth or egg hatching, embryo development ending in birth or egg hatching, reproduction, embryo development ending in birth or egg hatching, reproduction
FBgn0038313	CG4338		WBGene00018679	F52C12.2	lipid storage
FBgn0046114	Gclm	positive regulation of glutamate-cysteine ligase activity, glutathione biosynthetic process, learning or memory, olfactory learning, positive regulation of glutamate-cysteine ligase activity, glutathione biosynthetic process, glutathione biosynthetic process, behavioral response to ethanol, detoxification of arsenic-containing substance, response to DNA damage stimulus, long-term memory	WBGene00017084	E01A2.1	lipid storage
FBgn0029152	Mkrn1		WBGene00021924	Y55F3AM.6
FBgn0026143	CDC45L	DNA replication, DNA replication, DNA replication, DNA amplification, DNA-dependent DNA replication initiation, DNA-dependent DNA replication initiation, chromosome condensation, neuron projection morphogenesis, mitotic cell cycle G2/M transition DNA damage checkpoint, mitotic cell cycle G2/M transition DNA damage checkpoint, neurogenesis	WBGene00009372	evl-18	DNA-dependent DNA replication initiation, embryo development ending in birth or egg hatching, embryo development ending in birth or egg hatching, embryo development ending in birth or egg hatching, embryo development ending in birth or egg hatching
FBgn0259937	Nop60B	ribosome biogenesis, rRNA processing, pseudouridine synthesis, rRNA processing, germ cell development, wing disc development, neurogenesis	WBGene00010478	K01G5.5	RNA processing, RNA processing, pseudouridine synthesis, RNA modification, growth, nematode larval development, positive regulation of growth rate, positive regulation of growth rate, reproduction
FBgn0037702	CG8176		WBGene00018974	F56D12.6
FBgn0028692	Rpn2	proteolysis, proteolysis, proteolysis, proteasomal ubiquitin-dependent protein catabolic process, regulation of protein catabolic process, response to DNA damage stimulus	WBGene00004459	rpn-2	regulation of protein catabolic process, embryo development ending in birth or egg hatching, embryo development ending in birth or egg hatching, reproduction, embryo development ending in birth or egg hatching, embryo development ending in birth or egg hatching, nematode larval development, embryo development ending in birth or egg hatching, embryo development ending in birth or egg hatching, det…
FBgn0010339	128up		WBGene00012126	T28D6.6	embryo development ending in birth or egg hatching, nematode larval development, growth, nematode larval development, reproduction, embryo development ending in birth or egg hatching, growth, nematode larval development, growth, embryo development ending in birth or egg hatching, growth, nematode larval development, growth, embryo development ending in birth or egg hatching, growth, nematode larv…
FBgn0033886	CG13349	proteasomal ubiquitin-dependent protein catabolic process, proteasome assembly, ubiquitin-dependent protein catabolic process, lateral inhibition	WBGene00016981	C56G2.7
FBgn0028497	CG3530	protein dephosphorylation, dephosphorylation, mitotic cell cycle	WBGene00003478	mtm-6	dephosphorylation, body morphogenesis, endocytosis, nematode larval development, phosphatidylinositol metabolic process, regulation of Wnt receptor signaling pathway, regulation of cell migration
FBgn0031768	CG12393		WBGene00012560	Y37D8A.25
FBgn0036486	Msh6	DNA repair, postreplication repair, meiotic mismatch repair, negative regulation of DNA recombination, reciprocal meiotic recombination, DNA damage response, signal transduction resulting in induction of apoptosis, response to UV, maintenance of DNA repeat elements	WBGene00003422	msh-6	mismatch repair, mismatch repair, mismatch repair, mismatch repair, mismatch repair, mismatch repair, response to DNA damage stimulus, response to DNA damage stimulus, maintenance of DNA repeat elements, maintenance of DNA repeat elements, mismatch repair, mismatch repair

## Sheet: WEE_50-30-FEmbryo0-2h
fly gene ID	fly gene name	fly GO terms	worm gene ID	worm gene name	worm GO terms
FBgn0015754	Lis-1	germarium-derived oocyte differentiation, female germ-line cyst formation, fusome organization, oogenesis, regulation of catalytic activity, protein localization, germarium-derived oocyte fate determination, nucleus localization, oocyte fate determination, cytoplasmic transport, nurse cell to oocyte, oogenesis, oocyte nucleus migration involved in oocyte dorsal/ventral axis specification, chorion…	WBGene00003047	lis-1	embryo development ending in birth or egg hatching, embryo development ending in birth or egg hatching, locomotion, vulval development, reproduction, pronuclear migration, embryo development ending in birth or egg hatching, embryo development ending in birth or egg hatching, embryo development ending in birth or egg hatching, pronuclear migration, mitotic spindle organization, embryo development …
FBgn0004066	Pros28.1	proteolysis, ubiquitin-dependent protein catabolic process, proteasomal ubiquitin-dependent protein catabolic process, ubiquitin-dependent protein catabolic process, response to DNA damage stimulus	WBGene00003925	pas-4	ubiquitin-dependent protein catabolic process, proteolysis involved in cellular protein catabolic process, positive regulation of growth rate, embryo development ending in birth or egg hatching, nematode larval development, embryo development ending in birth or egg hatching, reproduction, embryo development ending in birth or egg hatching, growth, nematode larval development, locomotion, nematode…
FBgn0032223	GATAd	regulation of transcription, DNA-dependent	WBGene00001311	end-3	regulation of transcription, DNA-dependent, regulation of transcription, DNA-dependent, mesodermal cell fate specification, endodermal cell fate specification, endodermal cell fate specification, endodermal cell fate specification, endodermal cell fate specification, endodermal cell fate specification, endodermal cell fate specification
FBgn0015929	dpa	DNA replication, DNA replication, DNA endoreduplication, DNA replication, DNA replication, mitotic spindle organization, DNA replication, DNA-dependent DNA replication initiation	WBGene00003156	mcm-4	DNA replication, DNA-dependent DNA replication initiation, embryo development ending in birth or egg hatching, nucleus organization, embryo development ending in birth or egg hatching, growth, nematode larval development, embryo development ending in birth or egg hatching, embryo development ending in birth or egg hatching, embryo development ending in birth or egg hatching, nucleus organization,…
FBgn0029756	CG3309		WBGene00018777	F53H1.3	determination of adult lifespan
FBgn0041627	Ku80	double-strand break repair via nonhomologous end joining, DNA recombination, telomere maintenance	WBGene00000520	cku-80	double-strand break repair via nonhomologous end joining, double-strand break repair via nonhomologous end joining, double-strand break repair via nonhomologous end joining, telomere maintenance, DNA recombination, response to stress, growth
FBgn0040347	mus81	reciprocal meiotic recombination, DNA metabolic process, mitotic cell cycle G2/M transition DNA damage checkpoint	WBGene00016602	mus-81	DNA repair, DNA metabolic process, DNA metabolic process
FBgn0032916	CG9257		WBGene00018423	F44E2.10
FBgn0041186	Slbp	histone mRNA metabolic process, histone mRNA 3'-end processing, cell cycle, histone mRNA 3'-end processing, cell cycle, histone mRNA 3'-end processing, histone mRNA 3'-end processing, histone mRNA 3'-end processing, histone mRNA 3'-end processing, histone mRNA 3'-end processing	WBGene00000411	cdl-1	embryo development ending in birth or egg hatching, positive regulation of growth rate, morphogenesis of an epithelium, embryo development ending in birth or egg hatching, body morphogenesis, embryo development ending in birth or egg hatching, reproduction, hermaphrodite genitalia development, embryo development ending in birth or egg hatching, RNA interference, pharynx development, reproduction,…
FBgn0021761	Nup154	nucleocytoplasmic transport	WBGene00003794	npp-8	nucleocytoplasmic transport, embryo development ending in birth or egg hatching, embryo development ending in birth or egg hatching, hermaphrodite genitalia development, embryo development ending in birth or egg hatching, hermaphrodite genitalia development, embryo development ending in birth or egg hatching, embryo development ending in birth or egg hatching, embryo development ending in birth o…
FBgn0037383	CG2023		WBGene00018239	sec-20	positive regulation of growth rate, molting cycle, collagen and cuticulin-based cuticle, locomotion, locomotion, growth, nematode larval development, locomotion, molting cycle, collagen and cuticulin-based cuticle, receptor-mediated endocytosis, secretion by cell, secretion by cell, secretion by cell, secretion by cell
FBgn0034521	Mgat1	protein N-linked glycosylation, protein N-linked glycosylation via asparagine, determination of adult lifespan, mushroom body development, adult locomotory behavior, encapsulation of foreign target	WBGene00001639	gly-14	protein glycosylation, protein N-linked glycosylation
FBgn0039153	CG5463	glutaminyl-tRNA aminoacylation	WBGene00016524	C39B5.6
FBgn0011704	RnrS	DNA replication, oxidation-reduction process, deoxyribonucleoside diphosphate metabolic process, activation of caspase activity, neurogenesis	WBGene00004392	rnr-2	deoxyribonucleoside diphosphate metabolic process, oxidation-reduction process, oxidation-reduction process, oxidation-reduction process, embryo development ending in birth or egg hatching, embryo development ending in birth or egg hatching, morphogenesis of an epithelium, embryo development ending in birth or egg hatching, determination of adult lifespan, hermaphrodite genitalia development, emb…
FBgn0035424	CG11505	biological_process	WBGene00004147	larp-5
FBgn0036842	CG3797	metabolic process	WBGene00021372	ugt-45	metabolic process
FBgn0027070	CG17322	metabolic process	WBGene00021372	ugt-45	metabolic process
FBgn0002284	Pros26	ubiquitin-dependent protein catabolic process, proteolysis, proteasomal ubiquitin-dependent protein catabolic process, proteolysis involved in cellular protein catabolic process	WBGene00003952	pbs-6	proteolysis involved in cellular protein catabolic process, embryo development ending in birth or egg hatching, embryo development ending in birth or egg hatching, oviposition, locomotion, reproduction, embryo development ending in birth or egg hatching, growth, nematode larval development, locomotion, nematode larval development, body morphogenesis, embryo development ending in birth or egg hatc…
FBgn0038640	CG7706		WBGene00014011	ZK632.2	hermaphrodite genitalia development, morphogenesis of an epithelium, locomotion, hermaphrodite genitalia development, reproduction, receptor-mediated endocytosis, reproduction
FBgn0001179	hay	adult locomotory behavior, response to UV, nucleotide-excision repair, nucleotide-excision repair, transcriptional open complex formation at RNA polymerase II promoter, promoter clearance from RNA polymerase II promoter, transcription initiation from RNA polymerase II promoter, transcription initiation from RNA polymerase II promoter, regulation of alternative nuclear mRNA splicing, via spliceoso…	WBGene00013441	Y66D12A.15	nucleotide-excision repair, embryo development ending in birth or egg hatching, embryo development ending in birth or egg hatching
FBgn0024920	Ts	deoxyribonucleotide biosynthetic process, dTMP biosynthetic process, neurogenesis	WBGene00022455	Y110A7A.4	dTMP biosynthetic process, embryo development ending in birth or egg hatching, body morphogenesis, embryo development ending in birth or egg hatching, embryo development ending in birth or egg hatching, embryo development ending in birth or egg hatching, embryo development ending in birth or egg hatching, embryo development ending in birth or egg hatching, embryo development ending in birth or eg…
FBgn0038464	CG16941	nuclear mRNA splicing, via spliceosome, nuclear mRNA splicing, via spliceosome, nuclear mRNA splicing, via spliceosome, regulation of alternative nuclear mRNA splicing, via spliceosome, mitotic spindle organization, mitosis, nuclear mRNA splicing, via spliceosome	WBGene00004188	prp-21	RNA processing, embryo development ending in birth or egg hatching, morphogenesis of an epithelium, embryo development ending in birth or egg hatching, hermaphrodite genitalia development, embryo development ending in birth or egg hatching, collagen and cuticulin-based cuticle development, reproduction, hermaphrodite genitalia development, embryo development ending in birth or egg hatching, RNA i…
FBgn0015546	spel1	mismatch repair, maintenance of DNA repeat elements, mismatch repair, maintenance of DNA repeat elements, mismatch repair, maintenance of DNA repeat elements, mismatch repair, postreplication repair, meiotic gene conversion, intra-S DNA damage checkpoint, DNA damage response, signal transduction by p53 class mediator resulting in induction of apoptosis, double-strand break repair, postreplication…	WBGene00003418	msh-2	mismatch repair, mismatch repair, mismatch repair, mismatch repair, mismatch repair, response to DNA damage stimulus, response to DNA damage stimulus, reproduction, maintenance of DNA repeat elements, maintenance of DNA repeat elements, DNA damage response, signal transduction by p53 class mediator resulting in induction of apoptosis, maintenance of DNA repeat elements, maintenance of DNA repeat …
FBgn0035110	thoc7	mRNA processing, mRNA export from nucleus	WBGene00007195	B0513.2	mRNA processing, mRNA processing, embryo development ending in birth or egg hatching
FBgn0023522	CG11596	biological_process	WBGene00013015	Y48E1C.2
FBgn0037252	CG14650	response to heat	WBGene00001023	dnj-5
FBgn0029818	CG3033	attachment of GPI anchor to protein	WBGene00018006	hpo-3
FBgn0034908	CG5543	neurogenesis	WBGene00001513	gad-1	embryo development ending in birth or egg hatching, embryo development ending in birth or egg hatching, embryo development ending in birth or egg hatching, embryo development ending in birth or egg hatching, embryo development ending in birth or egg hatching, embryo development ending in birth or egg hatching, cell migration involved in gastrulation, establishment of mitotic spindle orientation, …
FBgn0033737	Nup54	nucleocytoplasmic transport, protein targeting, NLS-bearing substrate import into nucleus, NLS-bearing substrate import into nucleus, protein import into nucleus	WBGene00003787	npp-1	embryo development ending in birth or egg hatching, cell division, cytokinesis, embryo development ending in birth or egg hatching, embryo development ending in birth or egg hatching, embryo development ending in birth or egg hatching, RNA interference, receptor-mediated endocytosis, embryo development ending in birth or egg hatching, reproduction, embryo development ending in birth or egg hatchi…
FBgn0039861	pasha	primary miRNA processing, primary miRNA processing, primary miRNA processing, gene silencing by miRNA, imaginal disc growth, primary miRNA processing, germarium-derived oocyte fate determination, germarium-derived female germ-line cyst formation	WBGene00011908	pash-1	embryo development ending in birth or egg hatching, growth, nematode larval development, body morphogenesis, negative regulation of vulval development, morphogenesis of an epithelium, hermaphrodite genitalia development, locomotion, primary miRNA processing, regulation of development, heterochronic, hermaphrodite genitalia morphogenesis, morphogenesis of an epithelium, vulval development, regulat…
FBgn0000057	adp	carbohydrate metabolic process, carbohydrate metabolic process, lipid metabolic process, response to desiccation, lipid metabolic process, negative regulation of sequestering of triglyceride, negative regulation of sequestering of triglyceride, regulation of lipid storage	WBGene00044440	adpr-1	lipid storage
FBgn0030581	CG14408		WBGene00007270	C03C10.4
FBgn0260049	flr	actin filament depolymerization, actin polymerization or depolymerization, phagocytosis, engulfment, actin filament depolymerization, imaginal disc-derived wing hair organization, sarcomere organization	WBGene00010685	aipl-1	reproduction, actin filament organization, regulation of protein localization
FBgn0031696	Bub1	protein phosphorylation, protein phosphorylation, mitotic cell cycle spindle assembly checkpoint	WBGene00000275	bub-1	protein phosphorylation, morphogenesis of an epithelium, embryo development ending in birth or egg hatching, nematode larval development, hermaphrodite genitalia development, cell division, cytokinesis, embryo development ending in birth or egg hatching, embryo development ending in birth or egg hatching, locomotion, reproduction, embryo development ending in birth or egg hatching, reproduction, …
FBgn0011774	Irbp	double-strand break repair via nonhomologous end joining, telomere maintenance	WBGene00000519	cku-70	double-strand break repair via nonhomologous end joining, double-strand break repair via nonhomologous end joining, double-strand break repair via nonhomologous end joining, telomere maintenance, response to stress, determination of adult lifespan, determination of adult lifespan, determination of adult lifespan, determination of adult lifespan
FBgn0067102	GlcT-1	negative regulation of apoptosis	WBGene00019127	cgt-3
FBgn0002673	twe	embryo development, cellularization, pole cell formation, male meiosis, regulation of syncytial blastoderm mitotic cell cycle, protein dephosphorylation, protein dephosphorylation, spindle assembly involved in male meiosis, spindle assembly involved in female meiosis, meiotic G2/MI transition, spermatogenesis, spermatogenesis, protein dephosphorylation, meiotic G2/MI transition, protein dephospho…	WBGene00000388	cdc-25.3	M phase of mitotic cell cycle, protein dephosphorylation, cell cycle
FBgn0002673	twe	embryo development, cellularization, pole cell formation, male meiosis, regulation of syncytial blastoderm mitotic cell cycle, protein dephosphorylation, protein dephosphorylation, spindle assembly involved in male meiosis, spindle assembly involved in female meiosis, meiotic G2/MI transition, spermatogenesis, spermatogenesis, protein dephosphorylation, meiotic G2/MI transition, protein dephospho…	WBGene00000386	cdc-25.1	M phase of mitotic cell cycle, protein dephosphorylation, reproduction, embryo development ending in birth or egg hatching, embryo development ending in birth or egg hatching, embryo development ending in birth or egg hatching, reproduction, embryo development ending in birth or egg hatching, embryo development ending in birth or egg hatching, embryo development ending in birth or egg hatching, m…
FBgn0003525	stg	G2/M transition of mitotic cell cycle, G2/M transition of mitotic cell cycle, protein dephosphorylation, gastrulation, mesoderm development, centriole replication, regulation of mitosis, open tracheal system development, gastrulation, peripheral nervous system development, protein dephosphorylation, regulation of mitotic cell cycle, G2/M transition of mitotic cell cycle, G2/M transition of mitoti…	WBGene00000388	cdc-25.3	M phase of mitotic cell cycle, protein dephosphorylation, cell cycle
FBgn0003525	stg	G2/M transition of mitotic cell cycle, G2/M transition of mitotic cell cycle, protein dephosphorylation, gastrulation, mesoderm development, centriole replication, regulation of mitosis, open tracheal system development, gastrulation, peripheral nervous system development, protein dephosphorylation, regulation of mitotic cell cycle, G2/M transition of mitotic cell cycle, G2/M transition of mitoti…	WBGene00000386	cdc-25.1	M phase of mitotic cell cycle, protein dephosphorylation, reproduction, embryo development ending in birth or egg hatching, embryo development ending in birth or egg hatching, embryo development ending in birth or egg hatching, reproduction, embryo development ending in birth or egg hatching, embryo development ending in birth or egg hatching, embryo development ending in birth or egg hatching, m…
FBgn0051852	Tap42	regulation of signal transduction, neurogenesis	WBGene00022193	ppfr-4	regulation of signal transduction, oviposition, morphogenesis of an epithelium, body morphogenesis, embryo development ending in birth or egg hatching, reproduction, hermaphrodite genitalia development, embryo development ending in birth or egg hatching, reproduction, hermaphrodite genitalia development, reproduction, hermaphrodite genitalia development, reproduction, hermaphrodite genitalia deve…
FBgn0032194	CG4901	spliceosome disassembly, neurogenesis	WBGene00020263	T05E8.3	positive regulation of growth rate, hermaphrodite genitalia development, reproduction, positive regulation of growth rate, reproduction, positive regulation of growth rate, axonal fasciculation, locomotion, receptor-mediated endocytosis, positive regulation of growth rate, reproduction, hermaphrodite genitalia development
FBgn0031459	CG2862		WBGene00009002	hint-1
FBgn0037647	RagA	positive regulation of cell growth, regulation of autophagy, positive regulation of TOR signaling cascade, cellular response to starvation	WBGene00006414	raga-1	determination of adult lifespan, multicellular organism reproduction, positive regulation of TOR signaling cascade, determination of adult lifespan, positive regulation of multicellular organism growth, determination of adult lifespan, determination of adult lifespan, determination of adult lifespan
FBgn0030738	CG9915	transcription, DNA-dependent	WBGene00008729	F13B12.1	transcription, DNA-dependent, locomotion, reproduction
FBgn0032244	RfC3	DNA replication, DNA replication, neurogenesis, lateral inhibition	WBGene00018409	F44B9.8	DNA replication, embryo development ending in birth or egg hatching, embryo development ending in birth or egg hatching
FBgn0032030	Wdr82	microtubule severing, histone H3-K4 methylation, histone H3-K4 trimethylation, histone H3-K4 methylation	WBGene00016373	swd-2.1
FBgn0015737	Hmu	biosynthetic process	WBGene00010197	F57C2.5	biosynthetic process
FBgn0035111	CG16940		WBGene00018612	F48E8.6
FBgn0035831	CG8038	rRNA processing, mRNA cleavage, tRNA processing	WBGene00007603	C15C6.4	rRNA processing, rRNA processing, mRNA cleavage, mRNA cleavage, tRNA processing, tRNA processing, positive regulation of growth rate, positive regulation of growth rate, positive regulation of growth rate, hermaphrodite genitalia development, reproduction
FBgn0040230	dbo	regulation of synapse organization, cell growth, neuron projection morphogenesis	WBGene00020030	R12E2.1
FBgn0039450	CG5484	neuron projection morphogenesis, protein secretion, cell morphogenesis	WBGene00010178	yif-1
FBgn0024308			WBGene00022278	rcor-1	regulation of transcription, DNA-dependent
FBgn0037526	CG10092	arginyl-tRNA aminoacylation	WBGene00004680	rars-2	arginyl-tRNA aminoacylation, arginyl-tRNA aminoacylation, arginyl-tRNA aminoacylation, tRNA aminoacylation for protein translation, positive regulation of growth rate, positive regulation of growth rate, embryo development ending in birth or egg hatching, reproduction
FBgn0023506	Es2	nervous system development, nuclear mRNA splicing, via spliceosome	WBGene00018371	ess-2	meiosis, meiotic chromosome segregation, embryo development ending in birth or egg hatching, embryo development ending in birth or egg hatching, embryo development ending in birth or egg hatching
FBgn0039004	Nup133	mRNA export from nucleus, SMAD protein import into nucleus	WBGene00003801	npp-15	embryo development ending in birth or egg hatching, positive regulation of growth rate, embryo development ending in birth or egg hatching
FBgn0028685	Rpt4	proteolysis, proteolysis, proteolysis, proteasomal ubiquitin-dependent protein catabolic process, protein catabolic process, neurogenesis	WBGene00004504	rpt-4	protein catabolic process, positive regulation of growth rate, embryo development ending in birth or egg hatching, body morphogenesis, locomotion, reproduction, embryo development ending in birth or egg hatching, embryo development ending in birth or egg hatching, reproduction, nematode larval development, embryo development ending in birth or egg hatching, determination of adult lifespan, determ…
FBgn0038827	Fancd2	intra-S DNA damage checkpoint, DNA repair	WBGene00012767	fcd-2	embryo development ending in birth or egg hatching, embryo development ending in birth or egg hatching, fertilization, nucleotide-excision repair, regulation of DNA-dependent DNA replication
FBgn0034231	Apc10	mitotic anaphase, regulation of mitotic metaphase/anaphase transition, anaphase-promoting complex-dependent proteasomal ubiquitin-dependent protein catabolic process, endomitotic cell cycle, mitosis, neurogenesis	WBGene00000144	apc-10	embryo development ending in birth or egg hatching, reproduction, growth, nematode larval development, locomotion
FBgn0087040	alphaTub67C	embryo development ending in birth or egg hatching, nuclear division, female pronucleus assembly, embryo development, central nervous system development, sperm aster formation, peripheral nervous system development, embryonic cleavage, pronuclear migration, microtubule-based process, protein polymerization, GTP catabolic process, mitotic spindle organization, mitotic spindle organization, centros…	WBGene00006529	tba-2	microtubule-based process, protein polymerization, protein polymerization, protein polymerization, GTP catabolic process, GTP catabolic process, embryo development ending in birth or egg hatching, mitotic spindle organization, embryo development ending in birth or egg hatching, embryo development ending in birth or egg hatching, nematode larval development, growth, nematode larval development, em…
FBgn0087040	alphaTub67C	embryo development ending in birth or egg hatching, nuclear division, female pronucleus assembly, embryo development, central nervous system development, sperm aster formation, peripheral nervous system development, embryonic cleavage, pronuclear migration, microtubule-based process, protein polymerization, GTP catabolic process, mitotic spindle organization, mitotic spindle organization, centros…	WBGene00006528	tba-1	microtubule-based process, protein polymerization, protein polymerization, protein polymerization, GTP catabolic process, GTP catabolic process, embryo development ending in birth or egg hatching, mitotic spindle organization, embryo development ending in birth or egg hatching, embryo development ending in birth or egg hatching, growth, nematode larval development, reproduction, pronuclear migrat…
FBgn0032450	CG5776		WBGene00010562	cdc-48.3	positive regulation of growth rate, embryo development ending in birth or egg hatching, nematode larval development, growth, nematode larval development, positive regulation of growth rate, nematode larval development, receptor-mediated endocytosis, growth, nematode larval development, reproduction, growth, nematode larval development, positive regulation of growth rate, mitotic metaphase/anaphas…
FBgn0030894	CG7192		WBGene00015508	mvb-12	receptor-mediated endocytosis, protein catabolic process, endosome to lysosome transport via multivesicular body sorting pathway, receptor catabolic process
FBgn0011289	TfIIA-L	positive regulation of transcription from RNA polymerase II promoter, transcription initiation from RNA polymerase II promoter, transcription initiation from RNA polymerase II promoter, transcription initiation from RNA polymerase II promoter, regulation of transcription from RNA polymerase II promoter	WBGene00004136	pqn-51	transcription initiation from RNA polymerase II promoter, transcription initiation from RNA polymerase II promoter, transcription initiation from RNA polymerase II promoter, transcription initiation from RNA polymerase II promoter, embryo development ending in birth or egg hatching
FBgn0036184	PCID2		WBGene00016171	C27F2.10	embryo development ending in birth or egg hatching, growth, nematode larval development, body morphogenesis, reproduction, positive regulation of growth rate, embryo development ending in birth or egg hatching, body morphogenesis, embryo development ending in birth or egg hatching, body morphogenesis, body morphogenesis, locomotion, embryo development ending in birth or egg hatching, embryo devel…
FBgn0038046	CG5641	immune response, positive regulation of transcription, DNA-dependent, nuclear mRNA splicing, via spliceosome, positive regulation of transcription, DNA-dependent	WBGene00011253	R11H6.5	lipid storage
FBgn0000147	aur	mitotic centrosome separation, protein phosphorylation, asymmetric protein localization involved in cell fate determination, centrosome cycle, microtubule-based process, protein phosphorylation, regulation of neurogenesis, establishment of spindle orientation, asymmetric protein localization, asymmetric protein localization, regulation of neurogenesis, establishment of spindle orientation, centro…	WBGene00000099	air-2	protein phosphorylation, protein phosphorylation, embryo development ending in birth or egg hatching, meiosis, embryo development ending in birth or egg hatching, embryo development ending in birth or egg hatching, meiosis, embryo development ending in birth or egg hatching, hermaphrodite genitalia development, embryo development ending in birth or egg hatching, embryo development ending in birth…
FBgn0029857	wuho	oogenesis, spermatogenesis	WBGene00022420	Y102E9.2
FBgn0034722	Rtf1	transcription initiation, DNA-dependent, positive regulation of transcription, DNA-dependent, positive regulation of histone H3-K4 methylation, positive regulation of Notch signaling pathway	WBGene00009103	F25B3.6	transcription initiation, DNA-dependent, transcription initiation, DNA-dependent, histone modification, histone modification, positive regulation of growth rate, embryo development ending in birth or egg hatching, nematode larval development, body morphogenesis, reproduction, embryo development ending in birth or egg hatching, nematode larval development, growth, nematode larval development, loco…
FBgn0033995	CG8090		WBGene00013551	Y75B8A.16
FBgn0030063	CG1789	rRNA processing, translation, neurogenesis	WBGene00007623	C16C10.2	rRNA processing, positive regulation of growth rate, nematode larval development, growth, nematode larval development, receptor-mediated endocytosis, reproduction, growth, nematode larval development, reproduction, growth, nematode larval development, embryo development ending in birth or egg hatching
FBgn0040078	pont	positive regulation of gene expression, spindle assembly involved in mitosis, mitotic cell cycle G2/M transition DNA damage checkpoint	WBGene00007784	ruvb-1	positive regulation of growth rate, embryo development ending in birth or egg hatching, growth, nematode larval development, body morphogenesis, reproduction, positive regulation of growth rate, embryo development ending in birth or egg hatching, hermaphrodite genitalia development, embryo development ending in birth or egg hatching, growth, nematode larval development, embryo development ending …
FBgn0051961	CG31961	tubulin complex assembly, cell morphogenesis, neurogenesis	WBGene00044609	Y71H2AM.24	cell morphogenesis
FBgn0034803	CG9849	muscle cell fate determination	WBGene00020322	T07F12.2
FBgn0031312	Tango14	protein secretion, wing disc development	WBGene00009505	F37B12.3	locomotion, lipid storage, lipid storage, lipid storage, growth, nematode larval development, locomotion, embryo development ending in birth or egg hatching
FBgn0035713	CG10107	proteolysis, proteolysis, central nervous system projection neuron axonogenesis, dendritic spine morphogenesis, protein desumoylation, negative regulation of cell death, axon guidance	WBGene00006739	ulp-4	proteolysis, positive regulation of growth rate, body morphogenesis, oviposition, positive regulation of growth rate, embryo development ending in birth or egg hatching
FBgn0035713	CG10107	proteolysis, proteolysis, central nervous system projection neuron axonogenesis, dendritic spine morphogenesis, protein desumoylation, negative regulation of cell death, axon guidance	WBGene00006737	ulp-2	proteolysis, positive regulation of growth rate, positive regulation of growth rate, reproduction, embryo development ending in birth or egg hatching, growth, nematode larval development, reproduction, reproduction, reproduction, growth, reproduction, reproduction, reproduction, growth, nematode larval development, reproduction
FBgn0030420	CG12717	proteolysis, imaginal disc-derived wing morphogenesis, central nervous system projection neuron axonogenesis, dendritic spine morphogenesis, protein desumoylation	WBGene00006739	ulp-4	proteolysis, positive regulation of growth rate, body morphogenesis, oviposition, positive regulation of growth rate, embryo development ending in birth or egg hatching
FBgn0030420	CG12717	proteolysis, imaginal disc-derived wing morphogenesis, central nervous system projection neuron axonogenesis, dendritic spine morphogenesis, protein desumoylation	WBGene00006737	ulp-2	proteolysis, positive regulation of growth rate, positive regulation of growth rate, reproduction, embryo development ending in birth or egg hatching, growth, nematode larval development, reproduction, reproduction, reproduction, growth, reproduction, reproduction, reproduction, growth, nematode larval development, reproduction
FBgn0038039	CG5196	protein palmitoylation, Golgi organization	WBGene00010892	dhhc-6	reproduction, embryo development ending in birth or egg hatching, growth, nematode larval development, embryo development ending in birth or egg hatching, growth, nematode larval development
FBgn0040020	MED21	transcription initiation from RNA polymerase II promoter, regulation of transcription from RNA polymerase II promoter	WBGene00007704	mdt-21	positive regulation of growth rate, positive regulation of growth rate, axonal fasciculation, locomotion
FBgn0034933	CG3735	neurogenesis	WBGene00012756	Y41C4A.9	positive regulation of growth rate, reproduction
FBgn0026175	skpC	ubiquitin-dependent protein catabolic process	WBGene00004808	skr-2	ubiquitin-dependent protein catabolic process, ubiquitin-dependent protein catabolic process, ubiquitin-dependent protein catabolic process, positive regulation of growth rate, embryo development ending in birth or egg hatching, locomotion, hermaphrodite genitalia development, embryo development ending in birth or egg hatching, oviposition, gonad development, embryo development ending in birth or…
FBgn0026175	skpC	ubiquitin-dependent protein catabolic process	WBGene00004821	skr-15	ubiquitin-dependent protein catabolic process, ubiquitin-dependent protein catabolic process, ubiquitin-dependent protein catabolic process, positive regulation of growth rate, response to DNA damage stimulus
FBgn0026175	skpC	ubiquitin-dependent protein catabolic process	WBGene00018935	skr-18	ubiquitin-dependent protein catabolic process, ubiquitin-dependent protein catabolic process, ubiquitin-dependent protein catabolic process, positive regulation of growth rate, morphogenesis of an epithelium, locomotion, hermaphrodite genitalia development, morphogenesis of an epithelium, locomotion, hermaphrodite genitalia development, reproduction, receptor-mediated endocytosis, morphogenesis o…
FBgn0026175	skpC	ubiquitin-dependent protein catabolic process	WBGene00004823	skr-17	ubiquitin-dependent protein catabolic process, ubiquitin-dependent protein catabolic process, ubiquitin-dependent protein catabolic process, embryo development ending in birth or egg hatching, embryo development ending in birth or egg hatching, growth, nematode larval development, embryo development ending in birth or egg hatching, growth, reproduction, positive regulation of multicellular organi…
FBgn0027087	Aats-his	histidyl-tRNA aminoacylation, histidyl-tRNA aminoacylation	WBGene00002001	hars-1	histidyl-tRNA aminoacylation, positive regulation of growth rate, embryo development ending in birth or egg hatching, positive regulation of multicellular organism growth, reproduction, positive regulation of growth rate, embryo development ending in birth or egg hatching, growth, nematode larval development, embryo development ending in birth or egg hatching, receptor-mediated endocytosis, histi…
FBgn0260779	gatA	karyosome formation, oogenesis, translation	WBGene00021508	Y41D4A.6	lipid storage, lipid storage
FBgn0000182	BicC	ovarian follicle cell migration, oogenesis, negative regulation of oskar mRNA translation, oogenesis, oogenesis, negative regulation of oskar mRNA translation, negative regulation of oskar mRNA translation, mitosis, actin cytoskeleton organization, microtubule cytoskeleton organization	WBGene00001597	gld-3	embryo development ending in birth or egg hatching, reproduction, masculinization of hermaphroditic germ-line, regulation of cell proliferation, regulation of meiosis, regulation of cell proliferation, regulation of meiosis, germ cell development, regulation of cell proliferation, regulation of meiosis, regulation of cell proliferation, regulation of meiosis, germ cell development, germ cell deve…
FBgn0040336	Seipin	regulation of lipid biosynthetic process, regulation of lipid storage, phosphatidic acid metabolic process, response to starvation, regulation of lipid biosynthetic process, regulation of lipid biosynthetic process, regulation of triglyceride metabolic process, regulation of lipid biosynthetic process, diacylglycerol metabolic process	WBGene00019808	R01B10.6
FBgn0034614	CG9752	biological_process	WBGene00015702	C11D2.4
FBgn0037482	CG10055	biological_process	WBGene00021655	Y48A5A.1
FBgn0027495	CG8378	negative regulation of gene expression	WBGene00007403	set-3	growth, nematode larval development, determination of adult lifespan
FBgn0029942	CG2059	biological_process	WBGene00011029	R05D7.4
FBgn0261014	TER94	Golgi organization, regulation of pole plasm oskar mRNA localization, endoplasmic reticulum membrane fusion, microtubule cytoskeleton organization, endoplasmic reticulum organization, pole plasm oskar mRNA localization, oocyte microtubule cytoskeleton polarization, protein localization, rhabdomere development, positive regulation of proteasomal ubiquitin-dependent protein catabolic process, prote…	WBGene00008053	cdc-48.2	embryo development ending in birth or egg hatching, positive regulation of growth rate, locomotion, nematode larval development, embryo development ending in birth or egg hatching, embryo development ending in birth or egg hatching, cell division, cytokinesis, meiosis, endoplasmic reticulum unfolded protein response, embryo development ending in birth or egg hatching, embryo development ending in…
FBgn0015402	ksr	Ras protein signal transduction, anterior/posterior axis specification, embryo, torso signaling pathway, protein phosphorylation, protein phosphorylation, tracheal outgrowth, open tracheal system, signal transduction, imaginal disc-derived wing morphogenesis	WBGene00002240	ksr-2	protein phosphorylation, nematode larval development, vulval development, tail tip morphogenesis, meiotic cell cycle, Ras protein signal transduction, protein phosphorylation
FBgn0031456	Trn-SR	mRNA export from nucleus, protein import into nucleus, splicing factor protein import into nucleus, protein import into nucleus, regulation of nuclear mRNA splicing, via spliceosome, splicing factor protein import into nucleus, splicing factor protein import into nucleus, splicing factor protein import into nucleus, regulation of nuclear mRNA splicing, via spliceosome, splicing factor protein imp…	WBGene00006647	tsr-1	embryo development ending in birth or egg hatching, embryo development ending in birth or egg hatching, embryo development ending in birth or egg hatching, embryo development ending in birth or egg hatching
FBgn0261532	cdm	neuron-neuron synaptic transmission, phototaxis, intracellular protein transport, regulation of synaptic transmission	WBGene00011807	T16G12.6
FBgn0028507	CG3793	methylation	WBGene00007137	B0285.4	methylation
FBgn0038649	CG7718	phospholipid biosynthetic process	WBGene00021677	pgs-1	metabolic process, phospholipid biosynthetic process, embryo development ending in birth or egg hatching, reproduction, regulation of mitochondrial membrane potential, regulation of cell proliferation, phosphatidylglycerol biosynthetic process
FBgn0032934	CG8679		WBGene00002276	lem-3	axonal fasciculation, dendrite development, response to UV, response to X-ray, reproduction, DNA catabolic process, endonucleolytic, response to DNA damage stimulus, response to X-ray, response to UV-C, DNA catabolic process, endonucleolytic, response to DNA damage stimulus, response to X-ray, embryo development ending in birth or egg hatching
FBgn0030365	Tango4	protein secretion, Golgi organization, nuclear mRNA splicing, via spliceosome	WBGene00006481	plrg-1	embryo development ending in birth or egg hatching, reproduction, embryo development ending in birth or egg hatching, nematode larval development, growth, nematode larval development, embryo development ending in birth or egg hatching, molting cycle, collagen and cuticulin-based cuticle, locomotion, reproduction, embryo development ending in birth or egg hatching, embryo development ending in bir…
FBgn0260985	RfC4	mitotic chromosome condensation, sister chromatid segregation, DNA repair, DNA replication, DNA strand elongation involved in DNA replication, DNA replication, DNA replication, DNA replication, female meiosis chromosome segregation, mitotic chromosome condensation, mitosis, DNA damage checkpoint, DNA replication checkpoint, DNA strand elongation involved in DNA replication, neurogenesis, lateral …	WBGene00004338	rfc-2	DNA replication, embryo development ending in birth or egg hatching, embryo development ending in birth or egg hatching, locomotion, reproduction, embryo development ending in birth or egg hatching
FBgn0024371	E2f2	negative regulation of DNA replication, oocyte dorsal/ventral axis specification, oocyte anterior/posterior axis specification, negative regulation of DNA replication, DNA endoreduplication, DNA endoreduplication, oogenesis, imaginal disc development, G1/S transition of mitotic cell cycle, endomitotic cell cycle, negative regulation of transcription, DNA-dependent, negative regulation of transcri…	WBGene00001161	efl-1	regulation of transcription, DNA-dependent, negative regulation of vulval development, embryo development ending in birth or egg hatching, reproduction, gamete generation, negative regulation of vulval development, negative regulation of vulval development, negative regulation of Ras protein signal transduction, negative regulation of vulval development, embryonic digestive tract morphogenesis, e…
FBgn0037236	Skp2	ubiquitin-dependent protein catabolic process, mitotic cell cycle, endomitotic cell cycle	WBGene00018613	skpt-1
FBgn0058045	CG40045		WBGene00006704	ubc-7
FBgn0030456	CG4332		WBGene00011761	T13H5.8
FBgn0033846	mip120	eggshell chorion gene amplification, negative regulation of transcription from RNA polymerase II promoter, negative regulation of transcription from RNA polymerase II promoter, oogenesis, sperm motility, determination of adult lifespan	WBGene00003037	lin-54	positive regulation of growth rate, positive regulation of growth rate, hermaphrodite genitalia development, hermaphrodite genitalia development, embryo development ending in birth or egg hatching, negative regulation of vulval development, negative regulation of vulval development, negative regulation of vulval development, receptor-mediated endocytosis, regulation of transcription from RNA poly…
FBgn0015270	Orc2	DNA-dependent DNA replication, DNA replication, DNA-dependent DNA replication initiation, DNA-dependent DNA replication, chromatin silencing, DNA-dependent DNA replication, DNA replication, eggshell chorion gene amplification, DNA replication, mitotic spindle organization, mitotic chromosome condensation, chromosome condensation, DNA replication, eggshell chorion gene amplification, DNA replicati…	WBGene00003882	orc-2	DNA replication, embryo development ending in birth or egg hatching, positive regulation of multicellular organism growth, hermaphrodite genitalia development, negative regulation of vulval development, locomotion, positive regulation of growth rate, locomotion, positive regulation of locomotion, hermaphrodite genitalia development, reproduction, body morphogenesis, hermaphrodite genitalia develo…
FBgn0038118	timeout	DNA damage checkpoint, entrainment of circadian clock	WBGene00006571	tim-1	regulation of sister chromatid cohesion, regulation of sister chromatid cohesion, mitotic sister chromatid cohesion, mitotic sister chromatid cohesion, meiotic sister chromatid cohesion, embryo development ending in birth or egg hatching
FBgn0030969	CG7288	ubiquitin-dependent protein catabolic process, nuclear mRNA splicing, via spliceosome	WBGene00017280	usp-39	ubiquitin-dependent protein catabolic process, embryo development ending in birth or egg hatching, embryo development ending in birth or egg hatching, reproduction, hermaphrodite genitalia development, receptor-mediated endocytosis, morphogenesis of an epithelium, locomotion, reproduction, hermaphrodite genitalia development, embryo development ending in birth or egg hatching, growth, nematode la…
FBgn0015553	tos	DNA repair	WBGene00009731	exo-1	DNA repair, DNA repair
FBgn0038609	Nup43	mitosis	WBGene00007493	npp-23
FBgn0035489			WBGene00010420	H28O16.2
FBgn0031252	CG13690	RNA metabolic process	WBGene00004383	rnh-2	RNA metabolic process
FBgn0035998	CG3437		WBGene00006466	tag-115
FBgn0033994	CG7544	methylation	WBGene00014228	mett-10	centrosome cycle, embryo development, vulval development
FBgn0025864	Crag	asymmetric protein localization, basement membrane assembly, basal protein localization	WBGene00018681	F52C12.4	negative regulation of locomotion
FBgn0019949	Cdk9	transcription elongation from RNA polymerase II promoter, response to heat, transcription, DNA-dependent, protein phosphorylation, cell adhesion, regulation of cell shape, cell cycle, protein phosphorylation, neurogenesis	WBGene00000410	cdk-9	protein phosphorylation, protein phosphorylation, embryo development ending in birth or egg hatching, embryo development ending in birth or egg hatching, growth, nematode larval development, locomotion, positive regulation of growth rate, embryo development ending in birth or egg hatching, locomotion, embryo development ending in birth or egg hatching, embryo development ending in birth or egg ha…
FBgn0016696	Pitslre	protein phosphorylation, protein phosphorylation, protein phosphorylation, regulation of cell cycle, protein phosphorylation, cell cycle, cell adhesion, regulation of cell shape, protein phosphorylation	WBGene00013917	ZC504.3	protein phosphorylation, protein phosphorylation, embryo development ending in birth or egg hatching
FBgn0032120	CG33298	phospholipid transport, cation transport, intracellular protein transport, Golgi organization	WBGene00020784	tat-4	cation transport, phospholipid transport, growth, nematode larval development, reproduction, hermaphrodite genitalia development, positive regulation of multicellular organism growth, reproduction, hermaphrodite genitalia development, reproduction, growth, nematode larval development, reproduction, positive regulation of multicellular organism growth, reproduction, positive regulation of multicel…
FBgn0036850	Gem2	spliceosome assembly	WBGene00004886	smi-1	spliceosome assembly, nuclear mRNA splicing, via spliceosome, embryo development ending in birth or egg hatching
FBgn0034360	CG10927		WBGene00012927	Y47D3A.14
FBgn0037958	CG6962		WBGene00011037	R05D11.9	embryo development ending in birth or egg hatching
FBgn0010303	hep	dorsal closure, spreading of leading edge cells, JNK cascade, dorsal closure, dorsal closure, JNK cascade, protein phosphorylation, regulation of transcription from RNA polymerase II promoter, dorsal closure, ovarian follicle cell development, MAPKKK cascade, protein phosphorylation, imaginal disc fusion, thorax closure, chorion-containing eggshell pattern formation, micropyle formation, dorsal a…	WBGene00003185	mek-1	protein phosphorylation, response to copper ion, response to copper ion, response to cadmium ion, response to cadmium ion, response to starvation, response to starvation, activation of JUN kinase activity, response to starvation, response to starvation, MAPKKK cascade, MAPKKK cascade, regulation of growth rate, activation of MAPK activity, activation of MAPK activity, response to temperature stim…
FBgn0033844	bbc	phospholipid biosynthetic process	WBGene00013024	Y49A3A.1	phospholipid biosynthetic process, negative regulation of multicellular organism growth, embryo development ending in birth or egg hatching, lipid storage, lipid storage, embryo development ending in birth or egg hatching
FBgn0010590	Prosbeta1	proteasomal ubiquitin-dependent protein catabolic process, proteolysis involved in cellular protein catabolic process, response to DNA damage stimulus	WBGene00003947	pbs-1	proteolysis involved in cellular protein catabolic process, proteolysis involved in cellular protein catabolic process, reproduction, embryo development ending in birth or egg hatching, embryo development ending in birth or egg hatching, growth, nematode larval development, locomotion, embryo development ending in birth or egg hatching, apoptosis, reproduction
FBgn0033380	Phax	nervous system development, snRNA export from nucleus	WBGene00022192	Y71H2B.2	embryo development ending in birth or egg hatching
FBgn0020370	TppII	proteolysis, protein homooligomerization	WBGene00017686	tpp-2	proteolysis, lipid storage
FBgn0002441	l(3)mbt	regulation of preblastoderm mitotic cell cycle, syncytial nuclear migration, negative regulation of transcription from RNA polymerase II promoter, neuroblast proliferation, dendrite morphogenesis, muscle organ development, negative regulation of gene expression, negative regulation of cell proliferation	WBGene00021661	mbtr-1	regulation of transcription, DNA-dependent
FBgn0002441	l(3)mbt	regulation of preblastoderm mitotic cell cycle, syncytial nuclear migration, negative regulation of transcription from RNA polymerase II promoter, neuroblast proliferation, dendrite morphogenesis, muscle organ development, negative regulation of gene expression, negative regulation of cell proliferation	WBGene00003041	lin-61	regulation of transcription, DNA-dependent, positive regulation of growth rate, response to DNA damage stimulus, negative regulation of vulval development, negative regulation of vulval development, negative regulation of vulval development, negative regulation of vulval development, vulval development
FBgn0031310	CG4764		WBGene00014234	vps-29
FBgn0030801	Rcp	transcription, DNA-dependent, neuron projection morphogenesis	WBGene00044924	M106.7	transcription, DNA-dependent, cellular metabolic process
FBgn0032698	CG10336	response to DNA damage stimulus, replication fork protection, cell cycle	WBGene00017738	F23C8.9	response to DNA damage stimulus, cell cycle, replication fork protection
FBgn0037652	CG11980	biological_process	WBGene00007787	C27H6.8
FBgn0022213	Cas	apoptosis, protein import into nucleus, protein export from nucleus, protein export from nucleus, phagocytosis, engulfment, positive regulation of NFAT protein import into nucleus, neurogenesis	WBGene00002079	xpo-2	intracellular protein transport, intracellular protein transport, embryo development ending in birth or egg hatching, embryo development ending in birth or egg hatching, hermaphrodite genitalia development, embryo development ending in birth or egg hatching, locomotion, reproduction, embryo development ending in birth or egg hatching, positive regulation of growth rate, embryo development ending …
FBgn0029503	CHORD	centrosome duplication	WBGene00000502	chp-1	embryo development ending in birth or egg hatching, nematode larval development, embryo development ending in birth or egg hatching, reproduction, hermaphrodite genitalia development, reproduction, embryo development ending in birth or egg hatching, receptor-mediated endocytosis, striated muscle myosin thick filament assembly
FBgn0030790	CG4768		WBGene00016741	C48B6.3
FBgn0037202	Ssl1	promoter clearance from RNA polymerase II promoter, transcription initiation from RNA polymerase II promoter, transcription initiation from RNA polymerase II promoter, nucleotide-excision repair, transcriptional open complex formation at RNA polymerase II promoter, transcription from RNA polymerase II promoter	WBGene00011814	T16H12.4	DNA repair, nucleotide-excision repair, transcription, DNA-dependent, embryo development ending in birth or egg hatching, embryo development ending in birth or egg hatching, nematode larval development, body morphogenesis, locomotion, positive regulation of growth rate, embryo development ending in birth or egg hatching, locomotion, embryo development ending in birth or egg hatching
FBgn0031782	WDR79		WBGene00013669	Y105E8A.8
FBgn0031287	CG4291	nuclear mRNA splicing, via spliceosome, nuclear mRNA splicing, via spliceosome, nuclear mRNA splicing, via spliceosome	WBGene00010159	F56G4.4	positive regulation of multicellular organism growth, reproduction, locomotion, reproduction, hermaphrodite genitalia development, growth, nematode larval development, locomotion, locomotion, reproduction, hermaphrodite genitalia development
FBgn0039790	CG2246	nucleotide biosynthetic process	WBGene00012258	W04G3.5	nucleotide biosynthetic process
FBgn0024921	Trn	protein import into nucleus, phagocytosis, engulfment, neurogenesis	WBGene00002076	imb-2	intracellular protein transport, positive regulation of growth rate, embryo development ending in birth or egg hatching, nematode larval development, body morphogenesis, positive regulation of growth rate, embryo development ending in birth or egg hatching, locomotion, embryo development ending in birth or egg hatching, growth, nematode larval development, reproduction, embryo development ending …
FBgn0003139	PpV	protein dephosphorylation, G1/S transition of mitotic cell cycle, protein dephosphorylation, mitotic cell cycle	WBGene00007922	pph-6	mitosis, establishment of mitotic spindle localization, first cell cycle pseudocleavage, cortical actin cytoskeleton organization
FBgn0037843	CG4511		WBGene00006515	tag-170	cell redox homeostasis, embryo development ending in birth or egg hatching, embryo development ending in birth or egg hatching, embryo development ending in birth or egg hatching, oviposition, locomotion, embryo development ending in birth or egg hatching, locomotion, hermaphrodite genitalia development, collagen and cuticulin-based cuticle development, embryo development ending in birth or egg h…
FBgn0033698	CG8858	biological_process	WBGene00008422	D2045.2	mitosis
FBgn0035106	rno	regulation of transcription, DNA-dependent, negative regulation of epidermal growth factor receptor signaling pathway, negative regulation of epidermal growth factor receptor signaling pathway, compound eye photoreceptor development	WBGene00021810	phf-15	negative regulation of vulval development, negative regulation of vulval development, negative regulation of vulval development, nematode larval development
FBgn0030055	CG12772		WBGene00013235	Y56A3A.16
FBgn0023536	CG3156	heme biosynthetic process, mitochondrial transport, transmembrane transport	WBGene00001813	haf-3	transport, transport, transmembrane transport, transmembrane transport
FBgn0260962	pic	nucleotide-excision repair, nucleotide-excision repair, response to DNA damage stimulus, wing disc development, protein ubiquitination involved in ubiquitin-dependent protein catabolic process, defense response to fungus, eggshell chorion gene amplification, mitotic cell cycle G2/M transition DNA damage checkpoint	WBGene00010890	ddb-1	positive regulation of growth rate, nematode larval development, locomotion, positive regulation of growth rate, locomotion, reproduction, embryo development ending in birth or egg hatching, receptor-mediated endocytosis, reproduction, hermaphrodite genitalia development, protein catabolic process, positive regulation of growth rate, nematode larval development, locomotion, gamete generation
FBgn0035194	Psf1	neurogenesis, lateral inhibition	WBGene00011275	R53.6	embryo development ending in birth or egg hatching, nematode larval development, body morphogenesis, locomotion, embryo development ending in birth or egg hatching, hermaphrodite genitalia development, embryo development ending in birth or egg hatching, inductive cell migration
FBgn0052318	CG32318	microtubule-based movement	WBGene00011275	R53.6	embryo development ending in birth or egg hatching, nematode larval development, body morphogenesis, locomotion, embryo development ending in birth or egg hatching, hermaphrodite genitalia development, embryo development ending in birth or egg hatching, inductive cell migration
FBgn0034646	Rae1	regulation of G1/S transition of mitotic cell cycle, mRNA export from nucleus, centrosome organization, regulation of cell cycle, negative regulation of synaptic growth at neuromuscular junction, regulation of autophagy	WBGene00003803	rae-1	negative regulation of locomotion, hermaphrodite genitalia development, reproduction, positive regulation of growth rate, morphogenesis of an epithelium, locomotion, hermaphrodite genitalia development, reproduction, positive regulation of growth rate, morphogenesis of an epithelium, hermaphrodite genitalia development, reproduction, hermaphrodite genitalia development, embryo development ending …
FBgn0050290	Ppcdc	coenzyme A biosynthetic process	WBGene00009138	F25H9.6	reproduction, positive regulation of growth rate, reproduction, positive regulation of growth rate, reproduction, growth, nematode larval development, receptor-mediated endocytosis
FBgn0260398	Pbp49	snRNA transcription from RNA polymerase II promoter, snRNA transcription from RNA polymerase III promoter, snRNA transcription from RNA polymerase II promoter, protein-DNA complex assembly, snRNA transcription from RNA polymerase III promoter, protein-DNA complex assembly	WBGene00021667	Y48G1BM.1	reproduction
FBgn0260398	Pbp49	snRNA transcription from RNA polymerase II promoter, snRNA transcription from RNA polymerase III promoter, snRNA transcription from RNA polymerase II promoter, protein-DNA complex assembly, snRNA transcription from RNA polymerase III promoter, protein-DNA complex assembly	WBGene00011367	T02C12.2	positive regulation of growth rate, morphogenesis of an epithelium, hermaphrodite genitalia development, reproduction, positive regulation of growth rate, hermaphrodite genitalia development, reproduction, embryo development ending in birth or egg hatching, receptor-mediated endocytosis, reproduction, reproduction, hermaphrodite genitalia development, reproduction, hermaphrodite genitalia develop…
FBgn0261984	Ire1	response to unfolded protein, protein phosphorylation, protein phosphorylation, mRNA catabolic process, response to endoplasmic reticulum stress, endoplasmic reticulum unfolded protein response, regulation of RNA splicing, HAC1-type intron splice site recognition and cleavage, endoplasmic reticulum unfolded protein response, Golgi organization	WBGene00002147	ire-1	protein phosphorylation, protein phosphorylation, mRNA processing, reproduction, positive regulation of locomotion, endoplasmic reticulum unfolded protein response, lipid storage, nematode larval development, response to topologically incorrect protein, response to topologically incorrect protein
FBgn0036574	CG16838	neurogenesis	WBGene00013156	Y53F4B.9
FBgn0029999	CG1575		WBGene00012977	Y48A6C.4	growth, nematode larval development, positive regulation of growth rate, growth, nematode larval development, receptor-mediated endocytosis
FBgn0026722	drosha	primary miRNA processing, rRNA catabolic process, primary miRNA processing, neurogenesis, primary miRNA processing, germarium-derived female germ-line cyst formation, germarium-derived oocyte fate determination	WBGene00009163	drsh-1	RNA processing, rRNA catabolic process, embryo development ending in birth or egg hatching, embryo development ending in birth or egg hatching, mitotic spindle organization, embryo development ending in birth or egg hatching, cytokinesis, mitotic spindle organization, embryo development ending in birth or egg hatching, embryo development ending in birth or egg hatching, mitotic spindle organizati…
FBgn0010173	RpA-70	DNA-dependent DNA replication, DNA-dependent DNA replication, mitotic spindle organization, neuron projection morphogenesis, mitotic cell cycle G2/M transition DNA damage checkpoint	WBGene00017546	rpa-1	DNA replication, embryo development ending in birth or egg hatching, embryo development ending in birth or egg hatching, embryo development ending in birth or egg hatching, embryo development ending in birth or egg hatching, embryo development ending in birth or egg hatching, receptor-mediated endocytosis, positive regulation of helicase activity, positive regulation of helicase activity
FBgn0037549	CG7878		WBGene00013214	Y54G11A.3
FBgn0250843	Pros35	proteolysis, ubiquitin-dependent protein catabolic process, proteasomal ubiquitin-dependent protein catabolic process, ubiquitin-dependent protein catabolic process	WBGene00003927	pas-6	ubiquitin-dependent protein catabolic process, proteolysis involved in cellular protein catabolic process, embryo development ending in birth or egg hatching, reproduction, reproduction, embryo development ending in birth or egg hatching, nematode larval development, growth, nematode larval development, locomotion, embryo development ending in birth or egg hatching, molting cycle, collagen and cu…
FBgn0053635	CG33635	Golgi to endosome transport	WBGene00007690	C18E9.10	vesicle-mediated transport, transport, positive regulation of growth rate, embryo development ending in birth or egg hatching, growth, nematode larval development, determination of adult lifespan, receptor-mediated endocytosis
FBgn0039846	CG11337	mRNA catabolic process, RNA processing	WBGene00015266	BE0003N10.1	mRNA catabolic process, RNA processing
FBgn0012066			WBGene00008645	F10C2.4	DNA replication, DNA replication, DNA replication, nucleobase-containing compound metabolic process, embryo development ending in birth or egg hatching, cell division, cytokinesis, embryo development ending in birth or egg hatching, embryo development ending in birth or egg hatching, embryo development ending in birth or egg hatching, hatching, receptor-mediated endocytosis, embryo development en…
FBgn0031452	Cwc25	mitotic spindle organization	WBGene00003391	mog-3	positive regulation of embryonic development, embryo development ending in birth or egg hatching, embryo development ending in birth or egg hatching, body morphogenesis, feminization of hermaphroditic germ-line, meiotic prophase I
FBgn0051759	CG31759		WBGene00011268	R17.2
FBgn0039120	Nup98-96	phagocytosis, engulfment, SMAD protein import into nucleus, germ-line stem cell maintenance	WBGene00003796	npp-10	transport, embryo development ending in birth or egg hatching, embryo development ending in birth or egg hatching, embryo development ending in birth or egg hatching, embryo development ending in birth or egg hatching, reproduction, embryo development ending in birth or egg hatching, embryo development ending in birth or egg hatching, embryo development ending in birth or egg hatching, embryo dev…
FBgn0015019	Cctgamma	protein folding, protein folding, protein folding, mitotic spindle organization, trachea morphogenesis, terminal branching, open tracheal system	WBGene00018782	cct-3	cellular protein metabolic process, protein folding, embryo development ending in birth or egg hatching, reproduction, embryo development ending in birth or egg hatching, growth, nematode larval development, embryo development ending in birth or egg hatching, microtubule polymerization
FBgn0026402	NiPp1	negative regulation of protein dephosphorylation, axon guidance	WBGene00015233	B0511.7
FBgn0030026	sni	metabolic process	WBGene00000975	dhs-12	metabolic process
FBgn0250746	Prosbeta7	proteolysis, ubiquitin-dependent protein catabolic process, proteasomal ubiquitin-dependent protein catabolic process, proteolysis involved in cellular protein catabolic process, cellular process, mitotic spindle elongation, cell proliferation, mitotic spindle organization, centrosome organization, response to DNA damage stimulus, neurogenesis	WBGene00003953	pbs-7	proteolysis involved in cellular protein catabolic process, embryo development ending in birth or egg hatching, locomotion, embryo development ending in birth or egg hatching, reproduction, embryo development ending in birth or egg hatching, growth, nematode larval development, locomotion, reproduction, embryo development ending in birth or egg hatching, growth, nematode larval development, locom…
FBgn0035945	CG5026	dephosphorylation	WBGene00003479	mtm-9	dephosphorylation, endocytosis, endocytosis, regulation of cell migration
FBgn0046692	Stlk	protein phosphorylation, protein phosphorylation	WBGene00013132	strd-1	protein phosphorylation, embryo development ending in birth or egg hatching, maintenance of dauer, establishment or maintenance of cell polarity, synapse organization, protein localization to synapse, positive regulation of peptidyl-threonine phosphorylation, asymmetric neuroblast division, asymmetric neuroblast division, asymmetric neuroblast division
FBgn0030638	CG11655	sodium ion transport	WBGene00044650	Y71G10AR.4	sodium ion transport
FBgn0086683	Spf45	nuclear mRNA splicing, via spliceosome, regulation of alternative nuclear mRNA splicing, via spliceosome, DNA repair, nuclear mRNA splicing, via spliceosome, compound eye morphogenesis	WBGene00010233	F58B3.7
FBgn0036819	dysb	regulation of synaptic plasticity, long-term memory, negative regulation of dopamine metabolic process, mating behavior, sex discrimination, negative regulation of dopamine metabolic process, positive regulation of synaptic transmission, glutamatergic, adult locomotory behavior, short-term memory	WBGene00013697	dsbn-1
FBgn0030289	CG1597	oligosaccharide metabolic process	WBGene00008775	F13H10.4	oligosaccharide metabolic process, positive regulation of growth rate, locomotion, positive regulation of growth rate, locomotion
FBgn0020369	Pros45	ubiquitin-dependent protein catabolic process, proteolysis, proteolysis, proteolysis, proteolysis, proteasomal ubiquitin-dependent protein catabolic process, protein catabolic process, response to DNA damage stimulus	WBGene00018991	F56F11.4	protein catabolic process, embryo development ending in birth or egg hatching, nematode larval development, growth, nematode larval development, reproduction, hermaphrodite genitalia development, embryo development ending in birth or egg hatching, growth, nematode larval development, embryo development ending in birth or egg hatching, growth, nematode larval development, growth, nematode larval d…
FBgn0033526	Caf1-105	chromatin assembly or disassembly, nucleosome assembly	WBGene00022141	chaf-2	embryo development ending in birth or egg hatching, reproduction, embryo development ending in birth or egg hatching
FBgn0020255	ran	cell cycle, regulation of cell shape, cell adhesion, actin filament organization, GTP catabolic process, nucleocytoplasmic transport, intracellular protein transport, small GTPase mediated signal transduction, neuron projection morphogenesis, meiotic spindle organization	WBGene00004302	ran-1	small GTPase mediated signal transduction, GTP catabolic process, intracellular protein transport, nucleocytoplasmic transport, signal transduction, embryo development ending in birth or egg hatching, embryo development ending in birth or egg hatching, embryo development ending in birth or egg hatching, reproduction, nematode larval development, locomotion, reproduction, embryo development ending…
FBgn0034447	CG7744		WBGene00011994	T24F1.2	reproduction
FBgn0023520	CG3857		WBGene00013188	smg-9
FBgn0030512	CG9940	NAD biosynthetic process, NAD biosynthetic process	WBGene00007698	qns-1	nitrogen compound metabolic process, NAD biosynthetic process, NAD biosynthetic process
FBgn0086445	l(2)37Cd	phagocytosis, engulfment	WBGene00011368	tftc-5	negative regulation of vulval development, negative regulation of vulval development, RNA interference
FBgn0033272	RagC	positive regulation of TOR signaling cascade, cellular response to amino acid stimulus	WBGene00012497	ragc-1	embryo development ending in birth or egg hatching
FBgn0028693	Rpn12	proteolysis, proteolysis, proteolysis, proteasomal ubiquitin-dependent protein catabolic process, cellular process, cell proliferation, mitotic spindle organization, mitotic spindle elongation, neurogenesis, ubiquitin-dependent protein catabolic process	WBGene00004468	rpn-12	proteolysis, determination of adult lifespan, negative regulation of vulval development, negative regulation of vulval development, negative regulation of vulval development, RNA interference
FBgn0030996	CG14194		WBGene00013789	Y116A8C.9
FBgn0029958	Pdp	protein dephosphorylation, pyruvate metabolic process, protein dephosphorylation	WBGene00022832	pdp-1
FBgn0037026	CG3634	biological_process	WBGene00008686	F11A10.5	nematode larval development, growth, nematode larval development, reproduction, growth, nematode larval development, growth, nematode larval development, growth, nematode larval development, growth, nematode larval development, positive regulation of multicellular organism growth, body morphogenesis, positive regulation of multicellular organism growth, reproduction, growth, nematode larval devel…
FBgn0004913	Gnf1	DNA replication, DNA replication, DNA replication, DNA replication, neurogenesis, lateral inhibition	WBGene00004337	rfc-1	DNA replication, DNA replication, DNA replication, embryo development ending in birth or egg hatching, positive regulation of growth rate, embryo development ending in birth or egg hatching, growth, nematode larval development, embryo development ending in birth or egg hatching, response to DNA damage stimulus, receptor-mediated endocytosis, embryo development ending in birth or egg hatching, rep…
FBgn0029789	CG3160	GPI anchor metabolic process, intracellular protein transport, myo-inositol transport	WBGene00011835	T19B10.8	GPI anchor metabolic process, intracellular protein transport, embryo development ending in birth or egg hatching
FBgn0038569	CG7218	biological_process	WBGene00009172	F26F2.7	embryo development ending in birth or egg hatching
FBgn0035021	CG4622	biological_process	WBGene00021332	Y34D9A.7
FBgn0004643	mit(1)15	chromosome segregation, regulation of meiosis, meiotic anaphase I, mitotic cell cycle spindle assembly checkpoint, mitotic sister chromatid segregation, mitotic cell cycle spindle assembly checkpoint, cell cycle, neurogenesis	WBGene00017643	czw-1	mitosis, reproduction, positive regulation of growth rate, embryo development ending in birth or egg hatching, locomotion, locomotion, reproduction, embryo development ending in birth or egg hatching, nematode larval development, embryo development ending in birth or egg hatching, growth, nematode larval development, locomotion, reproduction, receptor-mediated endocytosis, secretion by cell, repr…
FBgn0031060	CG14231		WBGene00007237	C01G10.10
FBgn0028686	Rpt3	proteolysis, proteolysis, proteolysis, proteasomal ubiquitin-dependent protein catabolic process, protein catabolic process, response to DNA damage stimulus	WBGene00004503	rpt-3	protein catabolic process, embryo development ending in birth or egg hatching, reproduction, embryo development ending in birth or egg hatching, embryo development ending in birth or egg hatching, nematode larval development, embryo development ending in birth or egg hatching, nematode larval development, nematode larval development, determination of adult lifespan, determination of adult lifespa…
FBgn0261278	grp	protein phosphorylation, protein phosphorylation, DNA damage checkpoint, DNA damage checkpoint, regulation of syncytial blastoderm mitotic cell cycle, cell cycle, DNA damage checkpoint, DNA damage checkpoint, regulation of syncytial blastoderm mitotic cell cycle, DNA damage checkpoint, protein phosphorylation, cell cycle checkpoint, protein phosphorylation, mitotic cell cycle checkpoint, embryoni…	WBGene00000498	chk-1	protein phosphorylation, protein phosphorylation, embryo development ending in birth or egg hatching, nematode larval development, body morphogenesis, positive regulation of growth rate, embryo development ending in birth or egg hatching, reproduction, reproduction, embryo development ending in birth or egg hatching, embryo development ending in birth or egg hatching, reproduction, cell cycle, ce…
FBgn0261278	grp	protein phosphorylation, protein phosphorylation, DNA damage checkpoint, DNA damage checkpoint, regulation of syncytial blastoderm mitotic cell cycle, cell cycle, DNA damage checkpoint, DNA damage checkpoint, regulation of syncytial blastoderm mitotic cell cycle, DNA damage checkpoint, protein phosphorylation, cell cycle checkpoint, protein phosphorylation, mitotic cell cycle checkpoint, embryoni…	WBGene00019814	R02C2.1	protein phosphorylation, protein phosphorylation
FBgn0261278	grp	protein phosphorylation, protein phosphorylation, DNA damage checkpoint, DNA damage checkpoint, regulation of syncytial blastoderm mitotic cell cycle, cell cycle, DNA damage checkpoint, DNA damage checkpoint, regulation of syncytial blastoderm mitotic cell cycle, DNA damage checkpoint, protein phosphorylation, cell cycle checkpoint, protein phosphorylation, mitotic cell cycle checkpoint, embryoni…	WBGene00017083	kin-33	protein phosphorylation, protein phosphorylation
FBgn0261278	grp	protein phosphorylation, protein phosphorylation, DNA damage checkpoint, DNA damage checkpoint, regulation of syncytial blastoderm mitotic cell cycle, cell cycle, DNA damage checkpoint, DNA damage checkpoint, regulation of syncytial blastoderm mitotic cell cycle, DNA damage checkpoint, protein phosphorylation, cell cycle checkpoint, protein phosphorylation, mitotic cell cycle checkpoint, embryoni…	WBGene00019815	kin-34	protein phosphorylation, protein phosphorylation
FBgn0261278	grp	protein phosphorylation, protein phosphorylation, DNA damage checkpoint, DNA damage checkpoint, regulation of syncytial blastoderm mitotic cell cycle, cell cycle, DNA damage checkpoint, DNA damage checkpoint, regulation of syncytial blastoderm mitotic cell cycle, DNA damage checkpoint, protein phosphorylation, cell cycle checkpoint, protein phosphorylation, mitotic cell cycle checkpoint, embryoni…	WBGene00012792	Y43D4A.6	protein phosphorylation, protein phosphorylation
FBgn0036641	Smn	skeletal muscle thin filament assembly, spliceosomal snRNP assembly, neuromuscular junction development, ribonucleoprotein complex assembly, spliceosomal snRNP assembly, terminal cell fate specification, open tracheal system	WBGene00004887	smn-1	mRNA processing, embryo development ending in birth or egg hatching, growth, nematode larval development, reproduction, positive regulation of growth rate, embryo development ending in birth or egg hatching, reproduction, growth, nematode larval development, locomotion, growth, nematode larval development, locomotion, nematode larval development, growth, nematode larval development, locomotion, e…
FBgn0032216	CG5384	ubiquitin-dependent protein catabolic process, protein ubiquitination	WBGene00006856	usp-14	ubiquitin-dependent protein catabolic process
FBgn0034921	Dcp1	nuclear-transcribed mRNA catabolic process, pole plasm oskar mRNA localization, gene silencing by miRNA, nuclear-transcribed mRNA catabolic process, nonsense-mediated decay, regulation of cytoplasmic mRNA processing body assembly, positive regulation of gene silencing by miRNA	WBGene00021929	dcap-1	positive regulation of growth rate, embryo development ending in birth or egg hatching, deadenylation-dependent decapping of nuclear-transcribed mRNA
FBgn0038588	CG7156	protein phosphorylation, cell communication, neuron projection morphogenesis	WBGene00010096	rskd-1	protein phosphorylation, cell communication
FBgn0053182	Kdm4B	histone demethylation, histone H3-K36 demethylation, histone H3-K9 demethylation, histone H3-K9 demethylation	WBGene00012982	jmjd-2	determination of adult lifespan, determination of adult lifespan
FBgn0033233	Kdm4A	histone demethylation, histone H3-K9 demethylation, histone H3-K36 demethylation, positive regulation of gene expression	WBGene00012982	jmjd-2	determination of adult lifespan, determination of adult lifespan
FBgn0034962	MAN1	negative regulation of BMP signaling pathway	WBGene00002275	lem-2	determination of adult lifespan, cell division, cytokinesis, embryo development ending in birth or egg hatching, embryo development ending in birth or egg hatching, chromosome segregation, response to X-ray
FBgn0030522	CG11103	biological_process	WBGene00015353	C02F5.13
FBgn0037250	CG1074	methylation	WBGene00022107	Y71F9AL.1
FBgn0034314	nopo	signal transduction, defense response, chromosome organization, regulation of mitotic cell cycle	WBGene00015194	B0432.13	positive regulation of multicellular organism growth
FBgn0035627	Sse	mitotic sister chromatid segregation, meiosis I, mitotic sister chromatid segregation, proteolysis, phagocytosis, engulfment, neurogenesis	WBGene00004775	sep-1	proteolysis, embryo development ending in birth or egg hatching, meiotic chromosome segregation, embryo development ending in birth or egg hatching, embryo development ending in birth or egg hatching, meiosis, meiosis, embryo development ending in birth or egg hatching, hermaphrodite genitalia development, reproduction, embryo development ending in birth or egg hatching, embryo development ending…
FBgn0003676	T-cp1	protein folding, protein folding, phagocytosis, engulfment, mitotic spindle organization	WBGene00000377	cct-1	cellular protein metabolic process, protein folding, embryo development ending in birth or egg hatching, reproduction, positive regulation of growth rate, embryo development ending in birth or egg hatching, reproduction, hermaphrodite genitalia development, embryo development ending in birth or egg hatching, growth, nematode larval development, reproduction, growth, nematode larval development, r…
FBgn0041588	ligatin	translational initiation, translational initiation	WBGene00016113	C25H3.4	translational initiation
FBgn0033475	CG12129	regulation of transcription, DNA-dependent	WBGene00016019	C23H3.3	regulation of transcription, DNA-dependent, positive regulation of growth rate
FBgn0085478	CG34449		WBGene00012718	dhhc-8
FBgn0038593	CG7146	neuron projection morphogenesis	WBGene00011625	vps-39	intracellular protein transport, vesicle-mediated transport, morphogenesis of an epithelium, embryo development ending in birth or egg hatching, cell death, lipid storage, embryo development ending in birth or egg hatching, lipid storage
FBgn0032750	CG10495	tRNA processing, oxidation-reduction process	WBGene00016674	C45G9.2	tRNA processing, oxidation-reduction process
FBgn0015621	Clp	mRNA cleavage, mRNA polyadenylation, mRNA cleavage, neurogenesis	WBGene00044329	cpsf-4	embryo development ending in birth or egg hatching, cell division, cytokinesis, embryo development ending in birth or egg hatching, embryo development ending in birth or egg hatching, embryo development ending in birth or egg hatching, nematode larval development, nematode larval development, embryo development ending in birth or egg hatching, negative regulation of vulval development
FBgn0030049	Trf4-1	sister chromatid cohesion, ncRNA polyadenylation involved in polyadenylation-dependent ncRNA catabolic process	WBGene00014115	gld-4	positive regulation of growth rate, embryo development ending in birth or egg hatching, hermaphrodite genitalia development, positive regulation of growth rate, reproduction, reproduction, embryo development ending in birth or egg hatching, germ cell development, mRNA polyadenylation
FBgn0024992	CG2658	proteolysis, proteolysis, protein catabolic process	WBGene00021425	ppgn-1	proteolysis, protein catabolic process
FBgn0261811	pico	signal transduction, positive regulation of growth, actin filament organization, positive regulation of cell division, positive regulation of developmental growth, regulation of cell size, imaginal disc development, lateral inhibition	WBGene00012546	Y37D8A.4
FBgn0028499	CG7985	carbohydrate metabolic process	WBGene00021766	hex-4	carbohydrate metabolic process, carbohydrate metabolic process, carbohydrate metabolic process
FBgn0028499	CG7985	carbohydrate metabolic process	WBGene00012663	hex-3	carbohydrate metabolic process, carbohydrate metabolic process, carbohydrate metabolic process
FBgn0033317	CG8635	biological_process	WBGene00009189	F27D4.4
FBgn0086605	CG9853	biological_process	WBGene00017825	cee-1	positive regulation of growth rate, nematode larval development, embryo development ending in birth or egg hatching
FBgn0000251	cad	blastoderm segmentation, genital disc anterior/posterior pattern formation, hindgut morphogenesis, gastrulation involving germ band extension, germ-band extension, segment specification, hindgut morphogenesis, Malpighian tubule morphogenesis, analia development, anterior/posterior axis specification, positive regulation of cell proliferation, positive regulation of transcription from RNA polymera…	WBGene00003912	pal-1	regulation of transcription, DNA-dependent, embryo development ending in birth or egg hatching, embryo development ending in birth or egg hatching, embryo development ending in birth or egg hatching, embryo development ending in birth or egg hatching, embryo development ending in birth or egg hatching, embryo development ending in birth or egg hatching, embryo development ending in birth or egg h…
FBgn0025820	JTBR		WBGene00002180	jtr-1
FBgn0005696	DNApol-alpha73	DNA-dependent DNA replication, DNA replication	WBGene00001002	div-1	DNA replication, embryo development ending in birth or egg hatching, embryo development ending in birth or egg hatching, embryo development ending in birth or egg hatching, embryo development ending in birth or egg hatching, embryo development ending in birth or egg hatching, embryo development ending in birth or egg hatching, embryo development ending in birth or egg hatching, embryo development…
FBgn0051120	CG31120		WBGene00015915	C17G10.1	oxidation-reduction process, oxidation-reduction process, oxidation-reduction process, meiosis, meiotic chromosome segregation
FBgn0260991	Incenp	protein localization, histone phosphorylation, metaphase plate congression, asymmetric cell division, cytokinesis, meiotic chromosome condensation, male meiosis sister chromatid cohesion, mitotic spindle organization, spindle midzone assembly involved in meiosis, spindle assembly involved in female meiosis, neurogenesis	WBGene00011292	R102.5	embryo development ending in birth or egg hatching
FBgn0083992	Mkp	protein dephosphorylation, inactivation of MAPK activity	WBGene00021867	Y54F10BM.13	protein dephosphorylation, protein dephosphorylation, protein dephosphorylation, protein dephosphorylation
FBgn0025781	cdc16	mitotic anaphase, cell cycle, regulation of mitotic metaphase/anaphase transition, positive regulation of mitotic metaphase/anaphase transition, mitosis, neurogenesis	WBGene00001281	emb-27	embryo development ending in birth or egg hatching, reproduction, embryo development ending in birth or egg hatching, hermaphrodite genitalia development, embryo development ending in birth or egg hatching, embryo development ending in birth or egg hatching, reproduction, embryo development ending in birth or egg hatching, embryo development ending in birth or egg hatching, meiosis, mitosis, prot…
FBgn0027090	Aats-gln	glutaminyl-tRNA aminoacylation	WBGene00001336	qars-1	tRNA aminoacylation, tRNA aminoacylation, glutaminyl-tRNA aminoacylation, glutaminyl-tRNA aminoacylation, tRNA aminoacylation for protein translation, tRNA aminoacylation for protein translation, tRNA aminoacylation for protein translation, translation, positive regulation of growth rate, embryo development ending in birth or egg hatching, growth, nematode larval development, embryo development e…
FBgn0031286	CG3862		WBGene00012370	W09G3.7	meiotic chromosome segregation
FBgn0029113	Uba2	protein sumoylation, positive regulation of NF-kappaB transcription factor activity, SMT3-dependent protein catabolic process, humoral immune response, protein sumoylation	WBGene00006700	uba-2	protein modification process, oviposition, hermaphrodite genitalia development, positive regulation of vulval development, growth, nematode larval development, hermaphrodite genitalia development, embryo development ending in birth or egg hatching, growth, nematode larval development, locomotion, hermaphrodite genitalia development, reproduction, positive regulation of growth rate, embryo develop…
FBgn0259979	CG17337	proteolysis	WBGene00022176	Y71H2AM.11	metabolic process
FBgn0036570	IntS9	mRNA cleavage, mRNA polyadenylation, snRNA 3'-end processing, snRNA processing	WBGene00017608	F19F10.12	embryo development ending in birth or egg hatching
FBgn0033209	CG12107		WBGene00018431	F44E7.9
FBgn0026582	CG9418		WBGene00012209	hmg-20	meiotic chromosome segregation, reproduction
FBgn0035027	CG3511	protein folding	WBGene00000891	cyn-15	protein folding, regulation of cell proliferation, regulation of meiosis, regulation of cell proliferation, regulation of meiosis, embryo development ending in birth or egg hatching, reproduction, germ cell development, embryo development ending in birth or egg hatching, reproduction, germ cell development, embryo development ending in birth or egg hatching
FBgn0027617	CG5808	protein folding, nuclear mRNA splicing, via spliceosome, neurogenesis	WBGene00000890	sig-7	protein folding, embryo development ending in birth or egg hatching, growth, nematode larval development, embryo development ending in birth or egg hatching, embryo development ending in birth or egg hatching, reproduction, embryo development ending in birth or egg hatching, growth, embryo development ending in birth or egg hatching, growth, reproduction, hermaphrodite genitalia development, repr…
FBgn0029134	Prosbeta5	proteasomal ubiquitin-dependent protein catabolic process, proteolysis involved in cellular protein catabolic process, mitotic spindle organization, mitotic spindle elongation, cell proliferation, centrosome organization, neurogenesis	WBGene00003951	pbs-5	proteolysis involved in cellular protein catabolic process, proteolysis involved in cellular protein catabolic process, embryo development ending in birth or egg hatching, embryo development ending in birth or egg hatching, embryo development ending in birth or egg hatching, growth, nematode larval development, locomotion, reproduction, embryo development ending in birth or egg hatching, growth, …
FBgn0015625	CycB3	mitotic spindle organization, mitosis, cytokinesis after mitosis, cytokinesis after mitosis, regulation of cyclin-dependent protein kinase activity, regulation of G2/M transition of mitotic cell cycle, syncytial blastoderm mitotic cell cycle, regulation of chromatin binding	WBGene00000868	cyb-3	regulation of cyclin-dependent protein kinase activity, regulation of cyclin-dependent protein kinase activity, regulation of cell cycle, regulation of G2/M transition of mitotic cell cycle, embryo development ending in birth or egg hatching, embryo development ending in birth or egg hatching, cell division, cytokinesis, embryo development ending in birth or egg hatching, embryo development endin…
FBgn0000405	CycB	G2/M transition of mitotic cell cycle, G2/M transition of mitotic cell cycle, mitotic anaphase B, mitotic chromosome movement towards spindle pole, cytokinesis, cytokinesis after mitosis, attachment of spindle microtubules to kinetochore, embryonic development via the syncytial blastoderm, attachment of spindle microtubules to kinetochore, regulation of cyclin-dependent protein kinase activity, c…	WBGene00000867	cyb-2.2	regulation of cyclin-dependent protein kinase activity, regulation of cell cycle, embryo development ending in birth or egg hatching, embryo development ending in birth or egg hatching, growth, nematode larval development, reproduction, cell division, cytokinesis, negative regulation of multicellular organism growth, embryo development ending in birth or egg hatching, locomotion, embryo developme…
FBgn0000405	CycB	G2/M transition of mitotic cell cycle, G2/M transition of mitotic cell cycle, mitotic anaphase B, mitotic chromosome movement towards spindle pole, cytokinesis, cytokinesis after mitosis, attachment of spindle microtubules to kinetochore, embryonic development via the syncytial blastoderm, attachment of spindle microtubules to kinetochore, regulation of cyclin-dependent protein kinase activity, c…	WBGene00000866	cyb-2.1	regulation of cyclin-dependent protein kinase activity, regulation of cell cycle, embryo development ending in birth or egg hatching, embryo development ending in birth or egg hatching, embryo development ending in birth or egg hatching, growth, nematode larval development, reproduction, cell division, cytokinesis, negative regulation of multicellular organism growth, embryo development ending in…
FBgn0000405	CycB	G2/M transition of mitotic cell cycle, G2/M transition of mitotic cell cycle, mitotic anaphase B, mitotic chromosome movement towards spindle pole, cytokinesis, cytokinesis after mitosis, attachment of spindle microtubules to kinetochore, embryonic development via the syncytial blastoderm, attachment of spindle microtubules to kinetochore, regulation of cyclin-dependent protein kinase activity, c…	WBGene00000865	cyb-1	regulation of cyclin-dependent protein kinase activity, regulation of cell cycle, embryo development ending in birth or egg hatching, growth, nematode larval development, reproduction, cell division, cytokinesis, oogenesis, embryo development ending in birth or egg hatching, oocyte maturation, positive regulation of protein phosphorylation
FBgn0017577	Mcm5	pre-replicative complex assembly, chromosome condensation, DNA-dependent DNA replication initiation, resolution of meiotic recombination intermediates, DNA endoreduplication, meiosis	WBGene00003157	mcm-5	DNA replication, DNA-dependent DNA replication initiation, embryo development ending in birth or egg hatching, embryo development ending in birth or egg hatching, embryo development ending in birth or egg hatching, cell division, cytokinesis, embryo development ending in birth or egg hatching, embryo development ending in birth or egg hatching, embryo development ending in birth or egg hatching, …
FBgn0040298	Myt1	protein phosphorylation, protein phosphorylation, protein phosphorylation, G2/M transition of mitotic cell cycle, negative regulation of mitotic cell cycle, G2/M transition of mitotic cell cycle, male germ-line stem cell division, spermatogonial cell division, meiosis, male meiosis, spermatocyte division, germarium-derived cystoblast division, female meiosis, positive regulation of cell size, mit…	WBGene00006940	wee-1.3	protein phosphorylation, reproduction, embryo development ending in birth or egg hatching, reproduction, embryo development ending in birth or egg hatching, reproduction, lipid storage, lipid storage, oogenesis, oogenesis, reproduction, reproduction, reproduction, receptor-mediated endocytosis, reproduction, oocyte maturation
FBgn0002283	l(3)73Ah		WBGene00008684	mig-32	embryo development ending in birth or egg hatching, tail tip morphogenesis, regulation of cell migration, reproduction, histone H2A ubiquitination, regulation of oviposition, regulation of axon extension involved in axon guidance, negative regulation of vulval development
FBgn0041781	SCAR	cytoskeleton organization, compound eye morphogenesis, axonal fasciculation, actin filament reorganization involved in cell cycle, axonogenesis, female germline ring canal stabilization, cortical actin cytoskeleton organization, regulation of cell shape, cell projection assembly, regulation of cell shape, actin filament organization, actin filament-based process, phagocytosis, engulfment, actin c…	WBGene00006958	wve-1	positive regulation of growth rate, embryo development ending in birth or egg hatching, body morphogenesis, body morphogenesis, locomotion, hermaphrodite genitalia development, embryo development ending in birth or egg hatching, growth, nematode larval development, oviposition, locomotion, hermaphrodite genitalia development, growth, nematode larval development, reproduction, hermaphrodite genita…
FBgn0259166	CG42271	phosphatidylinositol dephosphorylation, phosphatidylinositol dephosphorylation	WBGene00010975	R01H10.7
FBgn0261850	Xpd	nucleotide-excision repair, transcriptional open complex formation at RNA polymerase II promoter, nucleotide-excision repair, response to DNA damage stimulus, response to UV, promoter clearance from RNA polymerase II promoter, transcription initiation from RNA polymerase II promoter, transcription initiation from RNA polymerase II promoter, response to UV, regulation of mitosis, negative regulati…	WBGene00021752	Y50D7A.2	nucleotide-excision repair, nucleobase-containing compound metabolic process, embryo development ending in birth or egg hatching, positive regulation of growth rate, embryo development ending in birth or egg hatching, growth, nematode larval development, reproduction
FBgn0002787	Mov34	ubiquitin-dependent protein catabolic process, proteolysis, proteolysis, proteolysis, proteasomal ubiquitin-dependent protein catabolic process, cellular process, cell proliferation, mitotic spindle elongation, mitotic spindle organization, neurogenesis	WBGene00004464	rpn-8	embryo development ending in birth or egg hatching, growth, nematode larval development, reproduction, embryo development ending in birth or egg hatching, embryo development ending in birth or egg hatching, nematode larval development, reproduction, embryo development ending in birth or egg hatching, nematode larval development, embryo development ending in birth or egg hatching, determination of…
FBgn0028837	CSN6	protein stabilization, mitotic cell cycle G2/M transition DNA damage checkpoint, lateral inhibition	WBGene00000818	csn-6	embryo development ending in birth or egg hatching, reproduction, embryo development ending in birth or egg hatching, cytokinesis, apoptosis, reproduction
FBgn0028695	Rpn1	proteolysis, proteolysis, proteolysis, proteasomal ubiquitin-dependent protein catabolic process, regulation of protein catabolic process, cell proliferation, mitotic spindle elongation, mitotic spindle organization	WBGene00004458	rpn-1	regulation of protein catabolic process, reproduction, embryo development ending in birth or egg hatching, embryo development ending in birth or egg hatching, reproduction, embryo development ending in birth or egg hatching, reproduction, growth, nematode larval development, determination of adult lifespan, determination of adult lifespan, determination of adult lifespan, apoptosis, reproduction,…
FBgn0026192	par-6	zonula adherens assembly, establishment or maintenance of polarity of embryonic epithelium, establishment or maintenance of neuroblast polarity, establishment or maintenance of epithelial cell apical/basal polarity, border follicle cell migration, apical protein localization, establishment or maintenance of epithelial cell apical/basal polarity, oocyte axis specification, zonula adherens assembly…	WBGene00003921	par-6	embryo development ending in birth or egg hatching, embryo development ending in birth or egg hatching, embryo development ending in birth or egg hatching, growth, nematode larval development, positive regulation of growth rate, embryo development ending in birth or egg hatching, embryo development ending in birth or egg hatching, embryo development ending in birth or egg hatching, receptor-media…
FBgn0003165	pum	oogenesis, pole cell migration, germ-line stem cell division, negative regulation of translation, germ-line stem cell division, germ cell development, oogenesis, cell fate determination, positive regulation of translation, head involution, synaptic transmission, anterior/posterior axis specification, embryo, germ cell development, mitosis, negative regulation of cell cycle, cell migration, nuclea…	WBGene00004242	puf-6	oogenesis, hatching, cell division, cytokinesis, oogenesis, negative regulation of cell proliferation, germ cell development, negative regulation of translation, mRNA catabolic process
FBgn0003165	pum	oogenesis, pole cell migration, germ-line stem cell division, negative regulation of translation, germ-line stem cell division, germ cell development, oogenesis, cell fate determination, positive regulation of translation, head involution, synaptic transmission, anterior/posterior axis specification, embryo, germ cell development, mitosis, negative regulation of cell cycle, cell migration, nuclea…	WBGene00004243	puf-7	oogenesis, hatching, cell division, cytokinesis, oogenesis, germ cell development
FBgn0034791	CG3501	biological_process	WBGene00009118	F25H2.4	positive regulation of growth rate, embryo development ending in birth or egg hatching, embryo development, embryo development ending in birth or egg hatching, locomotion, reproduction, growth, nematode larval development, locomotion, positive regulation of growth rate, embryo development ending in birth or egg hatching, locomotion, reproduction, embryo development ending in birth or egg hatching…
FBgn0039339	CG5116		WBGene00009769	F46B6.4
FBgn0014861	Mcm2	pre-replicative complex assembly, pre-replicative complex assembly, cell proliferation, DNA replication, chromosome condensation, DNA replication, DNA-dependent DNA replication initiation, neurogenesis, lateral inhibition	WBGene00003154	mcm-2	DNA replication, DNA-dependent DNA replication initiation, embryo development ending in birth or egg hatching, embryo development ending in birth or egg hatching, reproduction, hermaphrodite genitalia development, embryo development ending in birth or egg hatching, determination of adult lifespan, embryo development ending in birth or egg hatching, determination of adult lifespan, determination o…
FBgn0086134	Pros25	ubiquitin-dependent protein catabolic process, proteolysis, proteasomal ubiquitin-dependent protein catabolic process, ubiquitin-dependent protein catabolic process, cellular process, mitotic spindle elongation, cell proliferation, mitotic spindle organization	WBGene00003923	pas-2	ubiquitin-dependent protein catabolic process, proteolysis involved in cellular protein catabolic process, nematode larval development, embryo development ending in birth or egg hatching, embryo development ending in birth or egg hatching
FBgn0033166	Eaf	regulation of DNA-dependent transcription in response to stress, wound healing	WBGene00017011	eaf-1
FBgn0026479	Drp1	synaptic vesicle budding from presynaptic membrane, cytokinesis, mitochondrion organization, vesicle organization, intracellular distribution of mitochondria, mitochondrion localization, sperm mitochondrion organization, mitochondrion organization, positive regulation of mitochondrial fission, mitochondrion organization	WBGene00001093	drp-1	morphogenesis of an epithelium, embryo development ending in birth or egg hatching, embryo development ending in birth or egg hatching, embryo development ending in birth or egg hatching, embryo development ending in birth or egg hatching, embryo development ending in birth or egg hatching, embryo development ending in birth or egg hatching, embryo development ending in birth or egg hatching, det…
FBgn0053181	CG33181	cation transport	WBGene00022682	ZK185.2	cation transport
FBgn0053181	CG33181	cation transport	WBGene00019504	K07H8.2	cation transport
FBgn0039240	CG3744	proteolysis	WBGene00001056	dpf-3	proteolysis, proteolysis
FBgn0020270	mre11	double-strand break repair, nucleotide-excision repair, telomere maintenance, chromosome organization, chromosome organization, telomere maintenance, G2/M transition DNA damage checkpoint, telomere maintenance, response to DNA damage stimulus, telomere capping	WBGene00003405	mre-11	DNA metabolic process, double-strand break repair, lipid storage, lipid storage, embryo development ending in birth or egg hatching, embryo development ending in birth or egg hatching, germline cell cycle switching, mitotic to meiotic cell cycle, embryo development ending in birth or egg hatching, meiotic chromosome segregation
FBgn0027603	Ulp1	proteolysis, protein processing, cellular response to hypoxia, central nervous system projection neuron axonogenesis, protein desumoylation, dendritic spine morphogenesis	WBGene00006736	ulp-1	proteolysis, reproduction, body morphogenesis, positive regulation of growth rate, reproduction, determination of adult lifespan, determination of adult lifespan, determination of adult lifespan, regulation of protein localization
FBgn0031422	CG9870	GPI anchor biosynthetic process	WBGene00022447	hpo-20	GPI anchor biosynthetic process
FBgn0261394	Pros29	proteolysis, ubiquitin-dependent protein catabolic process, proteasomal ubiquitin-dependent protein catabolic process, ubiquitin-dependent protein catabolic process, mitotic spindle elongation, mitotic spindle organization, cell proliferation	WBGene00003924	pas-3	ubiquitin-dependent protein catabolic process, proteolysis involved in cellular protein catabolic process, positive regulation of growth rate, embryo development ending in birth or egg hatching, positive regulation of growth rate, embryo development ending in birth or egg hatching, embryo development ending in birth or egg hatching, embryo development ending in birth or egg hatching, reproduction…
FBgn0011573	Cdc37	intracellular protein kinase cascade, transmembrane receptor protein tyrosine kinase signaling pathway, neurogenesis	WBGene00021097	cdc-37	positive regulation of growth rate, embryo development ending in birth or egg hatching, body morphogenesis, positive regulation of growth rate, morphogenesis of an epithelium, embryo development ending in birth or egg hatching, locomotion, hermaphrodite genitalia development, reproduction, embryo development ending in birth or egg hatching, receptor-mediated endocytosis, reproduction, hermaphrodi…
FBgn0043458	CG12084		WBGene00020762	zer-1
FBgn0015610			WBGene00003036	lin-53	embryo development ending in birth or egg hatching, nematode larval development, hermaphrodite genitalia development, embryo development ending in birth or egg hatching, nematode larval development, embryo development ending in birth or egg hatching, nematode larval development, reproduction, hermaphrodite genitalia development, embryo development ending in birth or egg hatching, embryo developme…
FBgn0039625	beta4GalNAcTB	carbohydrate metabolic process, N-acetylglucosamine metabolic process, glycolipid biosynthetic process	WBGene00000269	bre-4	carbohydrate metabolic process, response to toxin, response to toxin, positive regulation of Notch signaling pathway, protein glycosylation
FBgn0039258	beta4GalT7	proteoglycan biosynthetic process, glycosaminoglycan biosynthetic process, heparan sulfate proteoglycan biosynthetic process, chondroitin sulfate biosynthetic process, proteoglycan biosynthetic process, N-glycan processing	WBGene00005021	sqv-3	carbohydrate metabolic process, embryo development ending in birth or egg hatching, morphogenesis of an epithelium, vulval development, regulation of cell morphogenesis, oviposition, reproduction, embryo development ending in birth or egg hatching, chondroitin sulfate biosynthetic process, heparan sulfate proteoglycan biosynthetic process
FBgn0037376	CG2051	chromatin silencing at telomere, histone acetylation	WBGene00044069	hat-1	chromatin modification, embryo development ending in birth or egg hatching
FBgn0025463	Bap60	positive regulation of transcription, DNA-dependent, positive regulation of gene expression, positive regulation of heterochromatin formation, dendrite morphogenesis, neuron development, muscle organ development	WBGene00015971	swsn-2.2	embryo development ending in birth or egg hatching, growth, nematode larval development, embryo development ending in birth or egg hatching, hermaphrodite genitalia development, reproduction, growth, nematode larval development, embryo development ending in birth or egg hatching, regulation of transcription from RNA polymerase II promoter
FBgn0050443	Opbp		WBGene00013350	slr-2
FBgn0010421	TfIIFbeta	positive regulation of transcription initiation from RNA polymerase II promoter, positive regulation of transcription elongation from RNA polymerase II promoter, positive regulation of transcription from RNA polymerase II promoter, transcription from RNA polymerase II promoter, transcription initiation from RNA polymerase II promoter, transcription initiation from RNA polymerase II promoter	WBGene00012694	Y39B6A.36	transcription initiation from RNA polymerase II promoter, transcription initiation from RNA polymerase II promoter, transcription from RNA polymerase II promoter, positive regulation of growth rate, reproduction, positive regulation of growth rate, morphogenesis of an epithelium, reproduction, embryo development ending in birth or egg hatching, receptor-mediated endocytosis
FBgn0038578	MED17	transcription from RNA polymerase II promoter, transcription initiation from RNA polymerase II promoter, cellular process, sex comb development, transcription from RNA polymerase II promoter, regulation of transcription from RNA polymerase II promoter, positive regulation of transcription from RNA polymerase II promoter, mitotic cell cycle G2/M transition DNA damage checkpoint	WBGene00007017	mdt-17	regulation of transcription from RNA polymerase II promoter, embryo development ending in birth or egg hatching, reproduction, embryo development ending in birth or egg hatching, oviposition, locomotion, hermaphrodite genitalia development, positive regulation of growth rate, embryo development ending in birth or egg hatching, body morphogenesis, hermaphrodite genitalia development, reproduction,…
FBgn0030717	CG8931		WBGene00012740	Y40B1B.8
FBgn0035766	eco	mitotic sister chromatid cohesion, mitotic spindle organization	WBGene00017269	F08F8.4
FBgn0030678	CG11679	biological_process	WBGene00014176	ZK1010.2
FBgn0259113	DNApol-alpha180	DNA replication, DNA replication, DNA strand elongation involved in DNA replication, neurogenesis	WBGene00012936	Y47D3A.29	DNA replication, DNA replication, DNA replication, DNA replication, nucleobase-containing compound metabolic process, embryo development ending in birth or egg hatching, embryo development ending in birth or egg hatching, embryo development ending in birth or egg hatching, embryo development ending in birth or egg hatching, embryo development ending in birth or egg hatching, pronuclear migration,…
FBgn0010288	Uch	protein deubiquitination, ubiquitin-dependent protein catabolic process	WBGene00006723	ubh-3	ubiquitin-dependent protein catabolic process
FBgn0019637	Atu	regulation of hemocyte proliferation	WBGene00007110	B0035.11	embryo development ending in birth or egg hatching, growth, nematode larval development, positive regulation of growth rate, embryo development ending in birth or egg hatching, growth, nematode larval development, positive regulation of growth rate, body morphogenesis, reproduction, positive regulation of growth rate, embryo development ending in birth or egg hatching, body morphogenesis, locomot…
FBgn0037878	CG6693		WBGene00001041	dnj-23	locomotion, locomotion
FBgn0034403	CG18190		WBGene00012156	ebp-2
FBgn0015299	Ssb-c31a	negative regulation of transcription, DNA-dependent, regulation of transcription from RNA polymerase II promoter	WBGene00011743	T13F2.2	regulation of transcription, DNA-dependent, regulation of transcription, DNA-dependent
FBgn0032214	CG4968	protein metabolic process	WBGene00007718	otub-1	protein metabolic process, protein K48-linked deubiquitination
FBgn0003124	polo	male meiosis, mitosis, cytokinesis, male meiosis chromosome segregation, pronuclear migration, pronuclear fusion, female meiosis II, sperm aster formation, spindle assembly involved in female meiosis II, protein phosphorylation, protein localization, astral microtubule nucleation, protein phosphorylation, mitosis, cell cycle, phagocytosis, engulfment, female meiosis, mitotic spindle organization,…	WBGene00004042	plk-1	protein phosphorylation, protein phosphorylation, embryo development ending in birth or egg hatching, embryo development ending in birth or egg hatching, embryo development ending in birth or egg hatching, reproduction, cell division, cytokinesis, embryo development ending in birth or egg hatching, reproduction, embryo development ending in birth or egg hatching, nematode larval development, dete…
FBgn0003124	polo	male meiosis, mitosis, cytokinesis, male meiosis chromosome segregation, pronuclear migration, pronuclear fusion, female meiosis II, sperm aster formation, spindle assembly involved in female meiosis II, protein phosphorylation, protein localization, astral microtubule nucleation, protein phosphorylation, mitosis, cell cycle, phagocytosis, engulfment, female meiosis, mitotic spindle organization,…	WBGene00004043	plk-2	protein phosphorylation, protein phosphorylation, regulation of meiosis I, regulation of meiosis I
FBgn0036640	nxf2	mRNA export from nucleus, mRNA export from nucleus, mRNA transport	WBGene00003835	nxf-2	embryo development ending in birth or egg hatching
FBgn0003321	sbr	mRNA export from nucleus, mRNA export from nucleus, adult behavior, long-term memory, poly(A)+ mRNA export from nucleus, mRNA export from nucleus, mRNA export from nucleus, mRNA export from nucleus, nuclear export, mRNA polyadenylation	WBGene00003835	nxf-2	embryo development ending in birth or egg hatching
FBgn0027583	CG7601	metabolic process	WBGene00000993	dhs-30	metabolic process
FBgn0026380	Prosbeta3	proteolysis, proteasomal ubiquitin-dependent protein catabolic process, proteolysis involved in cellular protein catabolic process, response to DNA damage stimulus, neurogenesis	WBGene00003949	pbs-3	proteolysis involved in cellular protein catabolic process, embryo development ending in birth or egg hatching, locomotion, reproduction, embryo development ending in birth or egg hatching, nematode larval development, embryo development ending in birth or egg hatching, determination of adult lifespan, determination of adult lifespan, determination of adult lifespan, reproduction
FBgn0039634	CG11874	encapsulation of foreign target	WBGene00013881	mans-4	embryo development ending in birth or egg hatching
FBgn0034495	CG11788		WBGene00019595	K09H9.2
FBgn0025808	Rad17	DNA repair, DNA repair, cell cycle	WBGene00001998	hpr-17	DNA repair, cell cycle, positive regulation of growth rate, response to DNA damage stimulus
FBgn0003268	rod	mitotic cell cycle spindle assembly checkpoint, mitotic sister chromatid segregation, mitotic cell cycle spindle assembly checkpoint, protein localization to kinetochore	WBGene00018900	rod-1	embryo development ending in birth or egg hatching, embryo development ending in birth or egg hatching, embryo development ending in birth or egg hatching
FBgn0035907	CG6662	glutathione metabolic process	WBGene00001792	gst-44	metabolic process
FBgn0033979	Cyp6a19	oxidation-reduction process	WBGene00010606	cyp-13B2	oxidation-reduction process, oxidation-reduction process
FBgn0013773	Cyp6a22	oxidation-reduction process	WBGene00010606	cyp-13B2	oxidation-reduction process, oxidation-reduction process
FBgn0033121	Cyp6u1	oxidation-reduction process	WBGene00010606	cyp-13B2	oxidation-reduction process, oxidation-reduction process
FBgn0031126	Cyp6v1	oxidation-reduction process	WBGene00010606	cyp-13B2	oxidation-reduction process, oxidation-reduction process
FBgn0037567	Gfr		WBGene00008237	nstp-10
FBgn0030196	Psf3	neurogenesis, lateral inhibition	WBGene00022043	Y65B4BR.8	embryo development ending in birth or egg hatching, embryo development ending in birth or egg hatching, body morphogenesis, locomotion, hermaphrodite genitalia development, embryo development ending in birth or egg hatching, hermaphrodite genitalia development, embryo development ending in birth or egg hatching, embryo development ending in birth or egg hatching, receptor-mediated endocytosis
FBgn0035440	CG14969		WBGene00009627	F42A8.3
FBgn0038432	CG14883	lipid metabolic process, glycerol metabolic process, neuron projection morphogenesis	WBGene00022532	ZC155.4	glycerol metabolic process, lipid metabolic process
FBgn0032251	CG13142	DNA repair	WBGene00010409	H21P03.2	DNA repair
FBgn0003277	RpII215	transcription from RNA polymerase II promoter, transcription from RNA polymerase II promoter, transcription from RNA polymerase II promoter, transcription from RNA polymerase II promoter, mitotic cell cycle G2/M transition DNA damage checkpoint	WBGene00000123	ama-1	transcription from RNA polymerase II promoter, transcription, DNA-dependent, transcription, DNA-dependent, transcription, DNA-dependent, transcription, DNA-dependent, transcription, DNA-dependent, transcription, DNA-dependent, transcription, DNA-dependent, transcription, DNA-dependent, embryo development ending in birth or egg hatching, reproduction, positive regulation of growth rate, embryo dev…
FBgn0020407	asun	regulation of mitotic cell cycle, spermatogenesis, spermatogenesis, centrosome localization	WBGene00019822	R02D3.4
FBgn0034442	CG11257	oxidation-reduction process	WBGene00013123	Y52B11A.3	oxidation-reduction process, oxidation-reduction process, oxidation-reduction process
FBgn0034939	thoc5	mRNA export from nucleus, male meiosis	WBGene00021311	Y32H12A.2	embryo development ending in birth or egg hatching, reproduction, embryo development ending in birth or egg hatching
FBgn0032929	Mcm10	female meiosis chromosome segregation, pre-replicative complex assembly, chromosome condensation, DNA replication, regulation of cell cycle, chromosome condensation, heterochromatin organization involved in chromatin silencing, DNA endoreduplication	WBGene00012935	Y47D3A.28	DNA replication
FBgn0034925	CG5339		WBGene00020199	T03G11.6
FBgn0024912	agt	DNA dealkylation involved in DNA repair	WBGene00000093	agt-1	DNA repair, DNA dealkylation involved in DNA repair
FBgn0040075	rept	chromatin silencing, negative regulation of gene expression, mitotic cell cycle G2/M transition DNA damage checkpoint, neurogenesis	WBGene00020687	ruvb-2	positive regulation of growth rate, embryo development ending in birth or egg hatching, growth, nematode larval development, reproduction, cell division, cytokinesis, positive regulation of growth rate, embryo development ending in birth or egg hatching, embryo development ending in birth or egg hatching, growth, nematode larval development, reproduction, hermaphrodite genitalia development, embr…
FBgn0036510	CG7427		WBGene00010428	dcn-1	embryo development ending in birth or egg hatching, embryo development ending in birth or egg hatching, embryo development ending in birth or egg hatching, positive regulation of growth rate, embryo development ending in birth or egg hatching, locomotion, hermaphrodite genitalia development, reproduction, embryo development ending in birth or egg hatching, embryo development ending in birth or eg…
FBgn0015286	Rala	GTP catabolic process, negative regulation of JNK cascade, regulation of cell morphogenesis, negative regulation of JNK cascade, dorsal closure, negative regulation of JNK cascade, Ras protein signal transduction, negative regulation of JNK cascade, negative regulation of JNK cascade, negative regulation of JNK cascade, negative regulation of JNK cascade, negative regulation of JNK cascade, innat…	WBGene00021811	ral-1	small GTPase mediated signal transduction, GTP catabolic process, signal transduction, reproduction, determination of adult lifespan, oogenesis, reproduction, positive regulation of vulval development, positive regulation of vulval development, positive regulation of vulval development, positive regulation of vulval development, epidermal growth factor receptor signaling pathway, epidermal growth…
FBgn0000499	dsh	oogenesis, establishment of ommatidial planar polarity, negative regulation of heart induction by canonical Wnt receptor signaling pathway, heart formation, Wnt receptor signaling pathway, establishment of tissue polarity, Wnt receptor signaling pathway, heart development, Wnt receptor signaling pathway, imaginal disc-derived wing hair organization, imaginal disc-derived wing hair organization, i…	WBGene00003241	mig-5	multicellular organismal development, embryo development ending in birth or egg hatching, morphogenesis of an epithelium, embryo development ending in birth or egg hatching, oviposition, cell migration, cell migration, embryo development ending in birth or egg hatching, mitotic spindle organization, mitotic spindle organization, mitotic spindle organization, mitotic spindle organization, mitotic …
FBgn0000499	dsh	oogenesis, establishment of ommatidial planar polarity, negative regulation of heart induction by canonical Wnt receptor signaling pathway, heart formation, Wnt receptor signaling pathway, establishment of tissue polarity, Wnt receptor signaling pathway, heart development, Wnt receptor signaling pathway, imaginal disc-derived wing hair organization, imaginal disc-derived wing hair organization, i…	WBGene00001102	dsh-2	multicellular organismal development, embryo development ending in birth or egg hatching, growth, nematode larval development, reproduction, morphogenesis of an epithelium, embryo development ending in birth or egg hatching, body morphogenesis, locomotion, morphogenesis of an epithelium, body morphogenesis, hermaphrodite genitalia development, embryo development ending in birth or egg hatching, e…
FBgn0031006	rictor	response to DNA damage stimulus, dendrite morphogenesis, synaptic growth at neuromuscular junction	WBGene00009245	rict-1	lipid storage, lipid storage, feeding behavior, determination of adult lifespan
FBgn0037530	CG2943		WBGene00019209	H17B01.4	positive regulation of growth rate, receptor-mediated endocytosis
FBgn0040309	Jafrac1	hydrogen peroxide catabolic process, cell redox homeostasis, oxidation-reduction process, response to DNA damage stimulus, determination of adult lifespan, response to starvation, germ cell development, germ cell migration, response to oxidative stress, cell adhesion	WBGene00006434	prdx-2	oxidation-reduction process, oxidation-reduction process, positive regulation of multicellular organism growth, hydrogen peroxide catabolic process, response to hydrogen peroxide, heat acclimation, response to metal ion, negative regulation of transcription from RNA polymerase II promoter, determination of adult lifespan
FBgn0039066	EloA	positive regulation of transcription elongation from RNA polymerase II promoter, transcription elongation from RNA polymerase II promoter	WBGene00010990	R03D7.4	regulation of transcription, DNA-dependent, RNA interference, RNA interference, determination of adult lifespan
FBgn0038424	CG17565	protein farnesylation, regulation of cell proliferation	WBGene00006465	fntb-1	protein farnesylation, regulation of cell proliferation, embryo development ending in birth or egg hatching
FBgn0032988	Tif-IA	regulation of transcription from RNA polymerase I promoter, regulation of transcription from RNA polymerase I promoter, ribosome biogenesis	WBGene00007980	C36E8.1	positive regulation of growth rate, positive regulation of growth rate, determination of adult lifespan, reproduction, reproduction
FBgn0003656	sws	brain development, sensory perception of smell, phosphatidylcholine metabolic process, cellular membrane organization, membrane lipid metabolic process, neuron apoptosis	WBGene00022718	ZK370.4	lipid metabolic process, metabolic process
FBgn0024177	zpg	germ cell development, germ cell development, intercellular transport	WBGene00002144	inx-22	oocyte development
FBgn0024177	zpg	germ cell development, germ cell development, intercellular transport	WBGene00002136	inx-14	embryo development ending in birth or egg hatching, lipid storage, reproduction, embryo development ending in birth or egg hatching, embryo development ending in birth or egg hatching, determination of adult lifespan, embryo development ending in birth or egg hatching, embryo development ending in birth or egg hatching, apoptosis, reproduction, oocyte development
FBgn0035993	Nf-YA	regulation of transcription, DNA-dependent, phagocytosis, engulfment, regulation of cell cycle, lateral inhibition	WBGene00011614	nfya-1	regulation of transcription, DNA-dependent
FBgn0035993	Nf-YA	regulation of transcription, DNA-dependent, phagocytosis, engulfment, regulation of cell cycle, lateral inhibition	WBGene00043056	nfya-2	regulation of transcription, DNA-dependent
FBgn0035402	CG12082	protein deubiquitination, ubiquitin-dependent protein catabolic process, neuron projection morphogenesis	WBGene00020839	usp-5	ubiquitin-dependent protein catabolic process, positive regulation of growth rate, locomotion, hermaphrodite genitalia development, positive regulation of growth rate, positive regulation of locomotion, hermaphrodite genitalia development, reproduction
FBgn0024542	Neos	nuclear mRNA splicing, via spliceosome	WBGene00020399	ztf-4
FBgn0261854	aPKC	protein phosphorylation, zonula adherens assembly, establishment or maintenance of polarity of embryonic epithelium, establishment or maintenance of epithelial cell apical/basal polarity, establishment or maintenance of neuroblast polarity, germarium-derived oocyte fate determination, memory, asymmetric neuroblast division, cell-cell junction assembly, apical protein localization, asymmetric prot…	WBGene00004034	pkc-3	protein phosphorylation, protein phosphorylation, protein phosphorylation, protein phosphorylation, embryo development ending in birth or egg hatching, body morphogenesis, hermaphrodite genitalia development, negative regulation of vulval development, embryo development ending in birth or egg hatching, reproduction, embryo development ending in birth or egg hatching, receptor-mediated endocytosis…
FBgn0034071	CG8405	wing disc dorsal/ventral pattern formation	WBGene00021985	Y59C2A.2
FBgn0037622	CG8202	biological_process	WBGene00017837	F26G1.1	positive regulation of growth rate, reproduction, reproduction
FBgn0004889	tws	regulation of mitosis, mitotic anaphase, imaginal disc pattern formation, protein dephosphorylation, sensory organ development, embryonic development via the syncytial blastoderm, protein dephosphorylation, Wnt receptor signaling pathway, Wnt receptor signaling pathway, Wnt receptor signaling pathway, Wnt receptor signaling pathway, mitotic cell cycle, centrosome organization, maintenance of neur…	WBGene00006352	sur-6	signal transduction, embryo development ending in birth or egg hatching, nematode larval development, cell division, cytokinesis, embryo development ending in birth or egg hatching, embryo development ending in birth or egg hatching, embryo development ending in birth or egg hatching, embryo development ending in birth or egg hatching, morphogenesis of an epithelium, embryo development ending in …
FBgn0028700	RfC38	DNA replication, neurogenesis	WBGene00004339	rfc-3	DNA replication, embryo development ending in birth or egg hatching, embryo development ending in birth or egg hatching, positive regulation of growth rate, embryo development ending in birth or egg hatching, positive regulation of growth rate, embryo development ending in birth or egg hatching, locomotion, hermaphrodite genitalia development, reproduction, embryo development ending in birth or e…
FBgn0024330	MED6	transcription from RNA polymerase II promoter, transcription from RNA polymerase II promoter, transcription initiation from RNA polymerase II promoter, transcription from RNA polymerase II promoter, regulation of transcription from RNA polymerase II promoter, lateral inhibition	WBGene00003164	mdt-6	regulation of transcription from RNA polymerase II promoter, regulation of transcription from RNA polymerase II promoter, embryo development ending in birth or egg hatching, embryo development ending in birth or egg hatching, embryo development ending in birth or egg hatching, gonad development, germ cell development, embryo development ending in birth or egg hatching, growth, nematode larval dev…
FBgn0033247	Nup44A	SMAD protein import into nucleus, oogenesis, regulation of meiotic cell cycle, regulation of mitotic cell cycle	WBGene00003804	npp-18	meiotic chromosome segregation
FBgn0022786	Hira	chromatin remodeling, sperm chromatin decondensation, fertilization, exchange of chromosomal proteins, sperm chromatin decondensation, regulation of transcription, DNA-dependent, DNA replication-independent nucleosome assembly, DNA replication-independent nucleosome assembly	WBGene00019627	K10D2.1	regulation of transcription, DNA-dependent, regulation of transcription, DNA-dependent, chromatin modification, embryo development ending in birth or egg hatching
FBgn0037342	CG2931	nuclear mRNA splicing, via spliceosome, neurogenesis	WBGene00021901	tag-262	reproduction, reproduction
FBgn0033882			WBGene00004341	rfl-1	protein neddylation, protein modification process, embryo development ending in birth or egg hatching, locomotion, embryo development ending in birth or egg hatching, embryo development ending in birth or egg hatching, oviposition, vulval development, protein neddylation, protein neddylation
FBgn0040208	Kat60	microtubule severing, microtubule severing, microtubule-based process, plus-end specific microtubule depolymerization, mitotic anaphase A, microtubule severing, mitotic sister chromatid segregation, bristle development, wing disc development, wing disc development, microtubule severing, cytoplasmic microtubule organization, microtubule depolymerization, negative regulation of cell migration	WBGene00003183	mei-1	embryo development ending in birth or egg hatching, meiosis, embryo development ending in birth or egg hatching, embryo development ending in birth or egg hatching, cell division, cytokinesis, embryo development ending in birth or egg hatching, embryo development ending in birth or egg hatching, embryo development ending in birth or egg hatching, cytokinesis, embryo development ending in birth or…
FBgn0037363	CG1347		WBGene00013340	tcc-1
FBgn0029819	CG3016	ubiquitin-dependent protein catabolic process	WBGene00022052	Y67D2.2	ubiquitin-dependent protein catabolic process, embryo development ending in birth or egg hatching, nematode larval development
FBgn0260817	gkt	DNA repair, establishment or maintenance of epithelial cell apical/basal polarity, central nervous system development	WBGene00018678	F52C12.1	DNA repair
FBgn0051953	CR31953	DNA repair	WBGene00018678	F52C12.1	DNA repair
FBgn0004597	CycC	G1/S transition of mitotic cell cycle, transcription initiation from RNA polymerase II promoter, regulation of cyclin-dependent protein kinase activity, bristle development, sex comb development, regulation of transcription from RNA polymerase II promoter, mitotic cell cycle G2/M transition DNA damage checkpoint	WBGene00000506	cic-1	regulation of cyclin-dependent protein kinase activity, regulation of cyclin-dependent protein kinase activity, regulation of transcription, DNA-dependent, regulation of transcription, DNA-dependent, regulation of cell cycle
FBgn0037141	DNApol-eta	translesion synthesis, translesion synthesis, translesion synthesis, double-strand break repair via homologous recombination	WBGene00018721	polh-1	DNA repair, DNA repair
FBgn0011703	RnrL	DNA replication, DNA replication, oxidation-reduction process, activation of caspase activity, tissue regeneration	WBGene00004391	rnr-1	DNA replication, DNA replication, DNA replication, oxidation-reduction process, oxidation-reduction process, oxidation-reduction process, oxidation-reduction process, embryo development ending in birth or egg hatching, embryo development ending in birth or egg hatching, embryo development ending in birth or egg hatching, reproduction, embryo development ending in birth or egg hatching, reproducti…
FBgn0029094	asf1	nucleosome assembly, chromatin organization, chromatin organization, regulation of nuclear mRNA splicing, via spliceosome, muscle organ development, dendrite morphogenesis	WBGene00007277	asfl-1	chromatin assembly or disassembly
FBgn0028992	sds22	establishment or maintenance of polarity of larval imaginal disc epithelium, establishment or maintenance of polarity of follicular epithelium, negative regulation of cell proliferation, negative regulation of cell proliferation, establishment or maintenance of polarity of larval imaginal disc epithelium	WBGene00011637	T09A5.9	embryo development ending in birth or egg hatching, hermaphrodite genitalia development, embryo development ending in birth or egg hatching, embryo development ending in birth or egg hatching, locomotion, hermaphrodite genitalia development, reproduction, reproduction, embryo development ending in birth or egg hatching, receptor-mediated endocytosis
FBgn0028683	spt4	non-covalent chromatin modification, positive regulation of transcription elongation, DNA-dependent	WBGene00005014	spt-4	regulation of transcription, DNA-dependent, positive regulation of transcription elongation, DNA-dependent, determination of adult lifespan
FBgn0028343	l(1)G0222	cell morphogenesis, neurogenesis	WBGene00021945	lem-4	embryo development ending in birth or egg hatching, mitotic nuclear envelope reassembly, mitotic nuclear envelope reassembly
FBgn0031540	CG3238		WBGene00004028	pif-1
FBgn0086676	spin	peripheral nervous system development, regulation of female receptivity, regulation of programmed cell death, larval central nervous system remodeling, regulation of nurse cell apoptosis, programmed cell death, courtship behavior, regulation of synaptic growth at neuromuscular junction, transmembrane transport, endocytosis, endosome to lysosome transport, locomotion, oogenesis, synaptic vesicle e…	WBGene00013739	Y111B2A.19	transmembrane transport
FBgn0001225	Hsp26	response to heat, response to heat, determination of adult lifespan, cold acclimation	WBGene00004798	sip-1	determination of adult lifespan, determination of adult lifespan, determination of adult lifespan
FBgn0030096	Zpr1	transcription from RNA polymerase I promoter, lumen formation, open tracheal system, terminal branching, open tracheal system	WBGene00020999	W03F9.1
FBgn0011762	DNApol-alpha50	DNA replication, DNA replication, DNA replication, synthesis of RNA primer, DNA replication, DNA replication, synthesis of RNA primer, neurogenesis	WBGene00004180	pri-1	DNA replication, synthesis of RNA primer, DNA replication, synthesis of RNA primer, embryo development ending in birth or egg hatching, embryo development ending in birth or egg hatching, embryo development ending in birth or egg hatching, cell division, cytokinesis, embryo development ending in birth or egg hatching, embryo development ending in birth or egg hatching, growth, nematode larval dev…
FBgn0051957	CG31957	translational initiation	WBGene00014112	ZK856.11	translational initiation, translational initiation, positive regulation of growth rate, reproduction, growth, nematode larval development, embryo development ending in birth or egg hatching, reproduction, receptor-mediated endocytosis, growth, nematode larval development, reproduction, growth, nematode larval development
FBgn0035987	CG3689	mRNA cleavage, mRNA cleavage, mRNA polyadenylation	WBGene00009668	cfim-1	mRNA polyadenylation, embryo development ending in birth or egg hatching, reproduction, RNA interference, embryo development ending in birth or egg hatching, embryo development ending in birth or egg hatching, embryo development ending in birth or egg hatching, reproduction, reproduction, hermaphrodite genitalia development, locomotion, locomotion, embryo development ending in birth or egg hatchi…
FBgn0027868	Nup107	mRNA export from nucleus, SMAD protein import into nucleus	WBGene00003791	npp-5	transport, positive regulation of growth rate, embryo development ending in birth or egg hatching
FBgn0032863	cdc23	mitotic anaphase, phagocytosis, engulfment, positive regulation of mitotic metaphase/anaphase transition, endomitotic cell cycle, neurogenesis	WBGene00003134	mat-3	regulation of mitotic metaphase/anaphase transition, reproduction, meiosis, reproduction, meiosis, embryo development ending in birth or egg hatching, body morphogenesis, embryo development ending in birth or egg hatching, embryo development ending in birth or egg hatching, embryo development ending in birth or egg hatching, hermaphrodite genitalia development, reproduction, embryo development en…
FBgn0051687	CG31687	cell cycle, regulation of mitotic metaphase/anaphase transition, regulation of establishment of planar polarity	WBGene00003134	mat-3	regulation of mitotic metaphase/anaphase transition, reproduction, meiosis, reproduction, meiosis, embryo development ending in birth or egg hatching, body morphogenesis, embryo development ending in birth or egg hatching, embryo development ending in birth or egg hatching, embryo development ending in birth or egg hatching, hermaphrodite genitalia development, reproduction, embryo development en…
FBgn0027057	CSN1b	regulation of G-protein coupled receptor protein signaling pathway, protein stabilization, mitotic cell cycle G2/M transition DNA damage checkpoint, regulation of cell cycle, neurogenesis, lateral inhibition	WBGene00000813	csn-1	embryo development ending in birth or egg hatching, reproduction, embryo development ending in birth or egg hatching, cytokinesis, cytokinesis, embryo development ending in birth or egg hatching, reproduction, hermaphrodite genitalia development, embryo development ending in birth or egg hatching, embryo development ending in birth or egg hatching, reproduction, reproduction, hermaphrodite genita…
FBgn0028688	Rpn7	proteolysis, proteolysis, proteolysis, proteolysis, proteasomal ubiquitin-dependent protein catabolic process, cellular process, neurogenesis	WBGene00004463	rpn-7	embryo development ending in birth or egg hatching, reproduction, reproduction, embryo development ending in birth or egg hatching, reproduction, reproduction, embryo development ending in birth or egg hatching, embryo development ending in birth or egg hatching, reproduction, nematode larval development, embryo development ending in birth or egg hatching, molting cycle, collagen and cuticulin-ba…
FBgn0054015	CG34015	biological_process	WBGene00016150	hint-3
FBgn0038167	lkb1	protein phosphorylation, oocyte microtubule cytoskeleton organization, establishment or maintenance of cell polarity, pole plasm oskar mRNA localization, protein phosphorylation, regulation of JNK cascade, dorsal closure, positive regulation of apoptosis, mitotic spindle organization, asymmetric neuroblast division, border follicle cell delamination, determination of adult lifespan, maintenance o…	WBGene00003919	par-4	protein phosphorylation, protein phosphorylation, establishment of cell polarity, asymmetric protein localization involved in cell fate determination, asymmetric cell division, cell differentiation, peptidyl-threonine phosphorylation, response to oxidative stress, positive regulation of locomotion, establishment or maintenance of cell polarity, determination of adult lifespan, positive regulation…
FBgn0034073	CG8414		WBGene00010709	nol-9	positive regulation of growth rate, reproduction, positive regulation of growth rate, response to DNA damage stimulus
FBgn0015562	veg		WBGene00020375	T09B4.1	GPI anchor biosynthetic process, embryo development ending in birth or egg hatching, reproduction, embryo development ending in birth or egg hatching, reproduction, hermaphrodite genitalia development, reproduction, hermaphrodite genitalia development, reproduction, hermaphrodite genitalia development, growth, nematode larval development, reproduction, hermaphrodite genitalia development, reprodu…
FBgn0028479	Mtpalpha	fatty acid beta-oxidation, wound healing, response to starvation, fatty acid beta-oxidation, determination of adult lifespan	WBGene00020347	T08B2.7	metabolic process, fatty acid metabolic process, fatty acid metabolic process, oxidation-reduction process, oxidation-reduction process, oxidation-reduction process, oxidation-reduction process, oxidation-reduction process, fatty acid beta-oxidation, growth, nematode larval development, lipid storage, growth, nematode larval development, receptor-mediated endocytosis, embryo development ending in…
FBgn0027338	Kap-alpha3	protein import into nucleus, protein import into nucleus, protein import into nucleus, protein import into nucleus, positive regulation of NFAT protein import into nucleus, response to UV, mitotic cell cycle G2/M transition DNA damage checkpoint	WBGene00002074	ima-3	protein import into nucleus, protein import into nucleus, embryo development ending in birth or egg hatching, reproduction, embryo development ending in birth or egg hatching, growth, nematode larval development, locomotion, embryo development ending in birth or egg hatching, embryo development ending in birth or egg hatching, RNA interference, reproduction, oogenesis, gamete generation, meiosis,…
FBgn0033183	CG1620		WBGene00020320	T07F8.4	body morphogenesis, reproduction, reproduction
FBgn0062449	CG13197	protein dephosphorylation, protein dephosphorylation	WBGene00010037	F54C8.4	protein dephosphorylation, protein dephosphorylation, embryo development ending in birth or egg hatching, reproduction, embryo development ending in birth or egg hatching
FBgn0027948	msps	microtubule-based process, female meiosis, pronuclear fusion, mitosis, female meiosis, cytoplasmic microtubule organization, oocyte microtubule cytoskeleton organization, bicoid mRNA localization, cytoplasmic microtubule organization, mitotic spindle elongation, mitotic spindle elongation, positive regulation of microtubule nucleation, mitosis, endoplasmic reticulum organization, oogenesis, cytop…	WBGene00018781	F54A3.2
FBgn0040268	Top3alpha	DNA topological change, double-strand break repair via homologous recombination, mitochondrial genome maintenance, tissue regeneration, developmental growth	WBGene00006596	top-3	DNA topological change, DNA topological change, DNA topological change, DNA topological change, DNA topological change, DNA topological change, meiosis, gamete generation, meiosis
FBgn0026015	Top3beta	DNA catabolic process, endonucleolytic, DNA topological change	WBGene00012995	Y48C3A.14	DNA topological change, DNA topological change, DNA topological change, DNA topological change, DNA topological change, DNA topological change
FBgn0015509	lin19	ubiquitin-dependent protein catabolic process, mitotic cell cycle G2/M transition DNA damage checkpoint	WBGene00000836	cul-1	ubiquitin-dependent protein catabolic process, ubiquitin-dependent protein catabolic process, ubiquitin-dependent protein catabolic process, embryo development ending in birth or egg hatching, negative regulation of multicellular organism growth, embryo development ending in birth or egg hatching, embryo development ending in birth or egg hatching, embryo development ending in birth or egg hatchi…
FBgn0031640	CG11926		WBGene00018321	sand-1	embryo development ending in birth or egg hatching, body morphogenesis, locomotion, early endosome to late endosome transport, embryo development ending in birth or egg hatching, nematode larval development, body morphogenesis, positive regulation of locomotion, regulation of protein localization, phagosome maturation involved in apoptotic cell clearance
FBgn0036710	CG6479	phagocytosis, engulfment	WBGene00007186	B0464.6
FBgn0052104	CG32104		WBGene00004824	F56B3.4	ubiquitin-dependent protein catabolic process, positive regulation of growth rate, morphogenesis of an epithelium, locomotion, hermaphrodite genitalia development, morphogenesis of an epithelium, locomotion, hermaphrodite genitalia development, reproduction, receptor-mediated endocytosis, morphogenesis of an epithelium, morphogenesis of an epithelium, morphogenesis of an epithelium
FBgn0030800	CG9104	urea transport, proline transport, dendrite morphogenesis	WBGene00018635	nprl-2
FBgn0030486	Set2	regulation of transcription, DNA-dependent, histone methylation, instar larval development, ecdysone receptor-mediated signaling pathway, wing disc development, histone H3-K36 methylation	WBGene00019584	set-12	determination of adult lifespan
FBgn0039559	Mes-4	germ-line sex determination, gene silencing	WBGene00003222	mes-4	reproduction, reproduction, RNA interference, RNA interference, embryo development ending in birth or egg hatching, embryo development ending in birth or egg hatching, negative regulation of vulval development, negative regulation of vulval development, negative regulation of vulval development, negative regulation of vulval development, negative regulation of vulval development, negative regulat…
FBgn0034032	CG8195		WBGene00015009	B0041.5	lipid storage, axon guidance, axonal fasciculation, regulation of peptide transport, regulation of lipid storage
FBgn0038168	omd	snRNA 3'-end processing, neurogenesis	WBGene00013075	Y51A2D.7	embryo development ending in birth or egg hatching, positive regulation of growth rate, embryo development ending in birth or egg hatching, locomotion, reproduction, embryo development ending in birth or egg hatching, growth, nematode larval development, reproduction, hermaphrodite genitalia development, reproduction, hermaphrodite genitalia development, reproduction, hermaphrodite genitalia deve…
FBgn0036648	CG4098		WBGene00003583	ndx-6
FBgn0036398	CG9007	oogenesis, regulation of transcription by chromatin organization	WBGene00022203	Y73B3A.1	determination of adult lifespan
FBgn0036398	CG9007	oogenesis, regulation of transcription by chromatin organization	WBGene00017482	set-9	response to DNA damage stimulus, determination of adult lifespan, determination of adult lifespan, determination of adult lifespan, determination of adult lifespan, determination of adult lifespan, determination of adult lifespan, determination of adult lifespan, determination of adult lifespan, determination of adult lifespan, determination of adult lifespan, determination of adult lifespan, det…
FBgn0015075	Ddx1	regulation of translational initiation, ribosome biogenesis, embryonic development via the syncytial blastoderm, spliceosome assembly	WBGene00021938	Y55F3BR.1	positive regulation of growth rate, reproduction, positive regulation of growth rate, locomotion, reproduction, positive regulation of growth rate, reproduction
FBgn0015075	Ddx1	regulation of translational initiation, ribosome biogenesis, embryonic development via the syncytial blastoderm, spliceosome assembly	WBGene00017620	F20A1.9	embryo development ending in birth or egg hatching
FBgn0004837	Su(H)	Notch signaling pathway, Notch signaling pathway, positive regulation of transcription from RNA polymerase II promoter, sensory organ precursor cell fate determination, Notch signaling pathway, positive regulation of transcription from RNA polymerase II promoter, Notch signaling pathway, Notch signaling pathway, dorsal/ventral lineage restriction, imaginal disc, lateral inhibition, crystal cell d…	WBGene00002245	lag-1	regulation of transcription, DNA-dependent, regulation of transcription, DNA-dependent, regulation of transcription, DNA-dependent, embryo development ending in birth or egg hatching, collagen and cuticulin-based cuticle development, embryo development ending in birth or egg hatching, nematode larval development, molting cycle, collagen and cuticulin-based cuticle, vulval development, cell divisi…
FBgn0026630	nes	germ cell migration, lipid modification, plasma membrane organization, sperm individualization	WBGene00020115	mboa-6	body morphogenesis, body morphogenesis
FBgn0036038	defl	snRNA processing, snRNA 3'-end processing, snRNA processing	WBGene00008361	D1043.1	embryo development ending in birth or egg hatching, body morphogenesis, locomotion, embryo development ending in birth or egg hatching, growth, nematode larval development, locomotion, embryo development ending in birth or egg hatching, receptor-mediated endocytosis
FBgn0029121	Sras	proteolysis	WBGene00001406	fce-2	CAAX-box protein processing
FBgn0016697	Prosalpha5	ubiquitin-dependent protein catabolic process, proteolysis, proteasomal ubiquitin-dependent protein catabolic process, ubiquitin-dependent protein catabolic process, cellular process	WBGene00003926	pas-5	ubiquitin-dependent protein catabolic process, proteolysis involved in cellular protein catabolic process, embryo development ending in birth or egg hatching, nematode larval development, locomotion, embryo development ending in birth or egg hatching, growth, nematode larval development, locomotion, reproduction, embryo development ending in birth or egg hatching, growth, nematode larval developm…
FBgn0037263	slx1	DNA repair, mitotic cell cycle G2/M transition DNA damage checkpoint	WBGene00018909	slx-1	embryo development ending in birth or egg hatching, growth, nematode larval development
FBgn0032259	CG6144	oxidation-reduction process	WBGene00007202	B0564.2	oxidation-reduction process
FBgn0053505	U3-55K	rRNA processing, neurogenesis	WBGene00020171	T02H6.1
FBgn0025830	IntS8	snRNA 3'-end processing, snRNA processing	WBGene00013021	Y48G10A.4	embryo development ending in birth or egg hatching, embryo development, gastrulation with mouth forming first, embryo development ending in birth or egg hatching, embryo development ending in birth or egg hatching, growth, nematode larval development, locomotion, reproduction, embryo development ending in birth or egg hatching, growth, nematode larval development, locomotion, embryo development e…
FBgn0022768	Pp2C1	protein dephosphorylation, protein dephosphorylation, protein dephosphorylation, oxidation-reduction process	WBGene00021856	Y54F10BM.1
FBgn0061515	endos	oogenesis, response to nutrient, oogenesis, water homeostasis, mitotic spindle organization, regulation of meiotic cell cycle, negative regulation of protein dephosphorylation, regulation of mitosis	WBGene00010730	ensa-1
FBgn0032596	CG17331	multicellular organism reproduction, proteasomal ubiquitin-dependent protein catabolic process, proteolysis involved in cellular protein catabolic process, cellular process, response to DNA damage stimulus	WBGene00003950	pbs-4	proteolysis involved in cellular protein catabolic process, embryo development ending in birth or egg hatching, embryo development ending in birth or egg hatching, reproduction, embryo development ending in birth or egg hatching, embryo development ending in birth or egg hatching, reproduction, embryo development ending in birth or egg hatching, embryo development ending in birth or egg hatching,…
FBgn0028470	Patr-1	cytoplasmic mRNA processing body assembly	WBGene00009661	patr-1	embryo development ending in birth or egg hatching, nematode larval development, growth, nematode larval development, reproduction, embryo development ending in birth or egg hatching, growth, nematode larval development
FBgn0036897	CG8786	protein ubiquitination involved in ubiquitin-dependent protein catabolic process, protein destabilization	WBGene00013674	Y105E8A.14
FBgn0036897	CG8786	protein ubiquitination involved in ubiquitin-dependent protein catabolic process, protein destabilization	WBGene00008330	C55A6.1
FBgn0028687	Rpt1	proteolysis, proteolysis, proteolysis, proteasomal ubiquitin-dependent protein catabolic process, protein catabolic process, cellular process, response to DNA damage stimulus	WBGene00004501	rpt-1	protein catabolic process, embryo development ending in birth or egg hatching, reproduction, reproduction, embryo development ending in birth or egg hatching, nematode larval development, embryo development ending in birth or egg hatching, determination of adult lifespan, determination of adult lifespan, determination of adult lifespan, reproduction
FBgn0035951	CG5068		WBGene00007188	B0464.9	embryo development ending in birth or egg hatching, reproduction, embryo development ending in birth or egg hatching, growth, nematode larval development, determination of adult lifespan
FBgn0027537	CG11092	nuclear pore organization, SMAD protein import into nucleus, cellular protein localization, NLS-bearing substrate import into nucleus	WBGene00003799	npp-13	transport, embryo development ending in birth or egg hatching, embryo development ending in birth or egg hatching, embryo development ending in birth or egg hatching, nucleus organization, establishment of mitotic spindle orientation
FBgn0261383	IntS6	snRNA 3'-end processing, snRNA processing	WBGene00000994	dic-1	embryo development ending in birth or egg hatching, embryo development ending in birth or egg hatching, locomotion, embryo development ending in birth or egg hatching, embryo development ending in birth or egg hatching, growth, nematode larval development, locomotion, reproduction, embryo development ending in birth or egg hatching, apoptosis, apoptosis, apoptosis, oogenesis, apoptosis, determina…
FBgn0011291	Taf11	regulation of transcription, DNA-dependent, transcription initiation from RNA polymerase II promoter, transcription initiation from RNA polymerase II promoter	WBGene00006394	taf-11.2	transcription initiation from RNA polymerase II promoter
FBgn0011291	Taf11	regulation of transcription, DNA-dependent, transcription initiation from RNA polymerase II promoter, transcription initiation from RNA polymerase II promoter	WBGene00006393	taf-11.1	transcription initiation from RNA polymerase II promoter
FBgn0011291	Taf11	regulation of transcription, DNA-dependent, transcription initiation from RNA polymerase II promoter, transcription initiation from RNA polymerase II promoter	WBGene00006395	taf-11.3	transcription initiation from RNA polymerase II promoter, positive regulation of growth rate
FBgn0024956	Mat1	transcription initiation from RNA polymerase II promoter, transcription initiation from RNA polymerase II promoter, cell cycle	WBGene00018769	mnat-1	cell cycle, cell cycle, embryo development ending in birth or egg hatching, reproduction, embryo development ending in birth or egg hatching
FBgn0039302	Nup358	NLS-bearing substrate import into nucleus, SMAD protein import into nucleus, protein import into nucleus	WBGene00003795	npp-9	intracellular transport, embryo development ending in birth or egg hatching, embryo development ending in birth or egg hatching, embryo development ending in birth or egg hatching, hermaphrodite genitalia development, embryo development ending in birth or egg hatching, collagen and cuticulin-based cuticle development, reproduction, hermaphrodite genitalia development, embryo development ending in…
FBgn0029067	Dd	negative regulation of BMP signaling pathway, imaginal disc-derived wing vein specification, negative regulation of BMP signaling pathway, negative regulation of BMP signaling pathway, negative regulation of BMP signaling pathway, negative regulation of BMP signaling pathway, negative regulation of BMP signaling pathway, negative regulation of BMP signaling pathway	WBGene00018474	scpl-2	regulation of nuclear division
FBgn0035421	CG12034	sphingomyelin metabolic process	WBGene00012105	T27F6.6
FBgn0067629	CG33332	biological_process	WBGene00009145	F26A3.7
FBgn0037156	CG11523		WBGene00020782	T24H7.3	embryo development ending in birth or egg hatching
FBgn0015279	Pi3K92E	phosphatidylinositol phosphorylation, positive regulation of organ growth, positive regulation of imaginal disc growth, phosphatidylinositol phosphorylation, regulation of cell proliferation, regulation of cell size, positive regulation of organ growth, positive regulation of growth, phosphatidylinositol phosphorylation, positive regulation of cell size, positive regulation of organ growth, phosp…	WBGene00000090	age-1	phosphatidylinositol phosphorylation, phosphatidylinositol-mediated signaling, determination of adult lifespan, determination of adult lifespan, determination of adult lifespan, determination of adult lifespan, determination of adult lifespan, dauer entry, determination of adult lifespan, reproduction, embryo development ending in birth or egg hatching, learning or memory, regulation of chemotaxi…
FBgn0038145	Droj2	response to heat, protein folding, neurogenesis	WBGene00001030	dnj-12	protein folding, protein folding, embryo development ending in birth or egg hatching, mitotic spindle organization, embryo development ending in birth or egg hatching, determination of adult lifespan
FBgn0001941	ifc	spermatogenesis, spindle assembly involved in male meiosis, spermatogenesis, oxidation-reduction process, fatty acid biosynthetic process	WBGene00017996	F33D4.4	lipid metabolic process, fatty acid biosynthetic process, fatty acid biosynthetic process, oxidation-reduction process, oxidation-reduction process
FBgn0260397	Su(var)3-3	regulation of transcription, DNA-dependent, oxidation-reduction process, histone H3-K4 demethylation, chromatin organization, oogenesis, gene silencing, histone H3-K4 demethylation, oogenesis, regulation of Notch signaling pathway, histone H3-K4 demethylation, imaginal disc-derived wing vein specification, heterochromatin organization, imaginal disc-derived wing vein specification	WBGene00005010	spr-5	histone H3-K4 demethylation, oxidation-reduction process, regulation of transcription, DNA-dependent, apoptosis, apoptosis, determination of adult lifespan, histone H3-K4 demethylation, histone H3-K4 demethylation
FBgn0260397	Su(var)3-3	regulation of transcription, DNA-dependent, oxidation-reduction process, histone H3-K4 demethylation, chromatin organization, oogenesis, gene silencing, histone H3-K4 demethylation, oogenesis, regulation of Notch signaling pathway, histone H3-K4 demethylation, imaginal disc-derived wing vein specification, heterochromatin organization, imaginal disc-derived wing vein specification	WBGene00011615	lsd-1	oxidation-reduction process, regulation of transcription, DNA-dependent, histone H3-K4 demethylation, apoptosis, apoptosis, determination of adult lifespan
FBgn0041585	olf186-F	positive regulation of NFAT protein import into nucleus, positive regulation of calcium ion transport, store-operated calcium entry, nervous system development, positive regulation of NFAT protein import into nucleus, store-operated calcium entry, store-operated calcium entry	WBGene00015648	orai-1	reproduction, reproduction, apoptosis, reproduction, store-operated calcium entry, ovulation, store-operated calcium entry
FBgn0026373	RpII33	transcription from RNA polymerase II promoter, transcription from RNA polymerase II promoter, cellular response to heat	WBGene00007971	rpb-3	transcription, DNA-dependent, transcription, DNA-dependent, transcription, DNA-dependent, transcription, DNA-dependent, positive regulation of growth rate, embryo development ending in birth or egg hatching, embryo development, gastrulation with mouth forming first, embryo development ending in birth or egg hatching, embryo development ending in birth or egg hatching, growth, nematode larval deve…
FBgn0023174	Prosbeta2	proteasomal ubiquitin-dependent protein catabolic process, proteolysis involved in cellular protein catabolic process, response to DNA damage stimulus	WBGene00003948	pbs-2	proteolysis involved in cellular protein catabolic process, proteolysis involved in cellular protein catabolic process, embryo development ending in birth or egg hatching, locomotion, embryo development ending in birth or egg hatching, growth, nematode larval development, locomotion, reproduction, embryo development ending in birth or egg hatching, growth, nematode larval development, locomotion,…
FBgn0034310	Nup75	mRNA export from nucleus, SMAD protein import into nucleus, NLS-bearing substrate import into nucleus	WBGene00003788	npp-2	positive regulation of growth rate, embryo development ending in birth or egg hatching, nucleus organization, embryo development ending in birth or egg hatching, embryo development ending in birth or egg hatching, reproduction, positive regulation of growth rate, locomotion, positive regulation of locomotion, embryo development ending in birth or egg hatching, oviposition, locomotion, hermaphrodi…
FBgn0025815	Mcm6	oogenesis, pre-replicative complex assembly, pre-replicative complex assembly, DNA replication, eggshell chorion gene amplification, DNA replication, eggshell chorion gene amplification, DNA-dependent DNA replication initiation, lateral inhibition	WBGene00003158	mcm-6	DNA replication, DNA-dependent DNA replication initiation, embryo development ending in birth or egg hatching, cell division, cytokinesis, embryo development ending in birth or egg hatching, reproduction, embryo development ending in birth or egg hatching, embryo development ending in birth or egg hatching, embryo development ending in birth or egg hatching, embryo development ending in birth or …
FBgn0030346	CG11802		WBGene00019126	F59E12.11	embryo development ending in birth or egg hatching, embryo development ending in birth or egg hatching, embryo development ending in birth or egg hatching, growth, nematode larval development, embryo development ending in birth or egg hatching, reproduction
FBgn0032907	CG9272	DNA repair, base-excision repair, response to DNA damage stimulus	WBGene00011201	nth-1	DNA repair, base-excision repair, depyrimidination, cellular response to hydrogen peroxide, DNA repair
FBgn0041004	CG17715		WBGene00044325	tag-321
FBgn0033897	Rcd1	centriole replication, mitotic cell cycle G2/M transition DNA damage checkpoint, neurogenesis	WBGene00018812	F54D11.2	embryo development ending in birth or egg hatching, negative regulation of vulval development, negative regulation of vulval development, negative regulation of vulval development, nematode larval development, RNA interference, reproduction
FBgn0031094	CG9578		WBGene00022803	ZK688.9	locomotion, oviposition
FBgn0020655	Gap69C	regulation of ARF GTPase activity, regulation of ARF protein signal transduction	WBGene00010500	K02B12.7	regulation of ARF GTPase activity
FBgn0011659	Mlh1	mismatch repair, mismatch repair, mismatch repair, reciprocal meiotic recombination	WBGene00003373	mlh-1	mismatch repair, mismatch repair, mismatch repair, mismatch repair, response to DNA damage stimulus
FBgn0026778	Rad1	DNA repair, DNA repair, DNA damage checkpoint	WBGene00003417	mrt-2	DNA damage checkpoint, DNA repair, DNA repair, response to DNA damage stimulus, meiotic chromosome segregation, meiotic chromosome segregation, DNA damage checkpoint, telomere maintenance, DNA damage response, signal transduction resulting in induction of apoptosis, telomere maintenance via telomerase, nucleotide-excision repair
FBgn0036239	Pop2	regulation of transcription from RNA polymerase II promoter, muscle organ development, neuron development, nuclear-transcribed mRNA poly(A) tail shortening, nuclear-transcribed mRNA poly(A) tail shortening, mitotic cell cycle G2/M transition DNA damage checkpoint, neurogenesis	WBGene00000369	ccf-1	embryo development ending in birth or egg hatching, reproduction, embryo development ending in birth or egg hatching, embryo development ending in birth or egg hatching, reproduction, embryo development ending in birth or egg hatching, embryo development ending in birth or egg hatching, embryo development ending in birth or egg hatching, embryo development ending in birth or egg hatching, nematod…
FBgn0031057	Ubqn	amyloid precursor protein metabolic process	WBGene00008852	ubql-1	nucleotide-excision repair, proteasomal ubiquitin-dependent protein catabolic process
FBgn0261972			WBGene00022512	ZC53.6
FBgn0030431	CG4407	metabolic process	WBGene00011271	flad-1	Mo-molybdopterin cofactor biosynthetic process, metabolic process, FAD biosynthetic process, positive regulation of growth rate, positive regulation of growth rate
FBgn0011768	Fdh	alcohol metabolic process, ethanol oxidation, regulation of nitric oxide metabolic process, visual learning, regulation of peptidyl-cysteine S-nitrosylation	WBGene00019240	H24K24.3	oxidation-reduction process, oxidation-reduction process, oxidation-reduction process, oxidation-reduction process, ethanol oxidation
FBgn0030121	Cfp1	histone H3-K4 methylation	WBGene00009924	F52B11.1	negative regulation of vulval development, negative regulation of vulval development
FBgn0004655	wapl	sister chromatid cohesion, female meiosis chromosome segregation	WBGene00019953	wapl-1	embryo development ending in birth or egg hatching, positive regulation of growth rate, embryo development ending in birth or egg hatching, oviposition, locomotion, embryo development ending in birth or egg hatching
FBgn0027055	CSN3	protein stabilization, mitotic cell cycle G2/M transition DNA damage checkpoint, regulation of cell cycle, lateral inhibition	WBGene00000815	csn-3	cytokinesis, ubiquitin-dependent protein catabolic process, ubiquitin-dependent protein catabolic process, establishment of mitotic spindle localization, cytokinesis
FBgn0261976	Psf2	DNA strand elongation involved in DNA replication, neurogenesis, lateral inhibition, chromosome condensation	WBGene00009287	F31C3.5	DNA replication, embryo development ending in birth or egg hatching, body morphogenesis, locomotion, embryo development, gastrulation with mouth forming first, embryo development ending in birth or egg hatching, growth, nematode larval development, hermaphrodite genitalia development, embryo development ending in birth or egg hatching, growth, nematode larval development, hermaphrodite genitalia …
FBgn0034269	CG6406		WBGene00017037	D1069.3	positive regulation of growth rate, locomotion, locomotion, hermaphrodite genitalia development, reproduction, positive regulation of growth rate, nematode larval development, locomotion, hermaphrodite genitalia development, reproduction, inductive cell migration, determination of adult lifespan
FBgn0026080	Tip60	regulation of transcription, DNA-dependent, histone acetylation, histone exchange, response to DNA damage stimulus, nervous system development, histone H4 acetylation, regulation of synaptic plasticity, regulation of terminal button organization	WBGene00007029	mys-1	regulation of transcription, DNA-dependent, morphogenesis of an epithelium, negative regulation of vulval development, positive regulation of growth rate, nematode larval development, body morphogenesis, embryo development ending in birth or egg hatching, reproduction, positive regulation of growth rate, nematode larval development, body morphogenesis, reproduction, positive regulation of growth …
FBgn0014340	mof	dosage compensation, dosage compensation, dosage compensation, by hyperactivation of X chromosome, histone acetylation, dosage compensation, dosage compensation, by hyperactivation of X chromosome, histone acetylation, peptidyl-lysine acetylation, histone acetylation, regulation of transcription, DNA-dependent, histone H4-K16 acetylation	WBGene00010537	mys-2	regulation of transcription, DNA-dependent, cell fate specification, cell fate specification, cell fate specification, protein localization to chromatin
FBgn0039585	CG1894	regulation of transcription, DNA-dependent	WBGene00010537	mys-2	regulation of transcription, DNA-dependent, cell fate specification, cell fate specification, cell fate specification, protein localization to chromatin
FBgn0024332	Mcm3	pre-replicative complex assembly, pre-replicative complex assembly, DNA-dependent DNA replication initiation, mitotic cell cycle G2/M transition DNA damage checkpoint, neurogenesis	WBGene00003155	mcm-3	DNA replication, DNA-dependent DNA replication initiation, embryo development ending in birth or egg hatching, cell division, cytokinesis, reproduction, hermaphrodite genitalia development, embryo development ending in birth or egg hatching, embryo development ending in birth or egg hatching
FBgn0259152	Clbn	protein export from nucleus	WBGene00022350	Y82E9BR.18
FBgn0023175	Prosalpha7	proteasomal ubiquitin-dependent protein catabolic process, ubiquitin-dependent protein catabolic process, response to DNA damage stimulus	WBGene00003928	pas-7	ubiquitin-dependent protein catabolic process, proteolysis involved in cellular protein catabolic process, embryo development ending in birth or egg hatching, nematode larval development, embryo development ending in birth or egg hatching, embryo development ending in birth or egg hatching, reproduction, molting cycle, collagen and cuticulin-based cuticle
FBgn0010877	l(3)05822	biological_process	WBGene00015128	B0303.7
FBgn0031419	CG15390		WBGene00010771	K11D2.5	protein secretion
FBgn0067628	CG33331	biological_process	WBGene00022126	Y71F9B.2
FBgn0030612	CG5599	tricarboxylic acid cycle, fatty-acyl-CoA biosynthetic process, phagocytosis, engulfment	WBGene00014054	ZK669.4	metabolic process, metabolic process, fatty-acyl-CoA biosynthetic process, embryo development ending in birth or egg hatching
FBgn0003557	Su(dx)	imaginal disc-derived wing margin morphogenesis, imaginal disc-derived wing margin morphogenesis, imaginal disc-derived wing vein morphogenesis, imaginal disc-derived wing vein morphogenesis, imaginal disc-derived wing vein morphogenesis, Notch signaling pathway, imaginal disc-derived leg joint morphogenesis, negative regulation of Notch signaling pathway, receptor internalization, regulation of …	WBGene00007009	wwp-1	protein modification process, lipid storage, lipid storage, lipid storage, lipid storage, embryo development ending in birth or egg hatching, embryo development ending in birth or egg hatching, embryo development ending in birth or egg hatching, axonal fasciculation, locomotion, determination of adult lifespan, embryo development ending in birth or egg hatching, dendrite development, regulation o…
FBgn0031633	CG2976	protein prenylation	WBGene00019823	fnta-1	protein prenylation, embryo development ending in birth or egg hatching, body morphogenesis, oviposition, hermaphrodite genitalia development, morphogenesis of an epithelium, locomotion, hermaphrodite genitalia development, embryo development ending in birth or egg hatching, reproduction, embryo development ending in birth or egg hatching, nematode larval development, growth, nematode larval deve…
FBgn0002044	swm	regulation of mitotic cell cycle, mRNA processing, negative regulation of smoothened signaling pathway, negative regulation of smoothened signaling pathway	WBGene00015143	B0336.3	positive regulation of growth rate, body morphogenesis, positive regulation of growth rate, striated muscle myosin thick filament assembly
FBgn0004406	tam	DNA-dependent DNA replication, DNA-dependent DNA replication, mitochondrial DNA replication, DNA-dependent DNA replication, eclosion, determination of adult lifespan, DNA-dependent DNA replication	WBGene00013258	polg-1	DNA replication, DNA replication, mitochondrial DNA replication, mitochondrion organization, defecation, gonad development, determination of adult lifespan
FBgn0031308	CG4749		WBGene00021476	Y39G10AR.21
FBgn0016698	Ptpa	regulation of catalytic activity	WBGene00022185	Y71H2AM.20	positive regulation of growth rate, reproduction, embryo development ending in birth or egg hatching, growth, nematode larval development, determination of adult lifespan
FBgn0032635	CG15141		WBGene00011912	T22C1.1
FBgn0040477	cid	chromatin assembly or disassembly, kinetochore organization, nucleosome assembly, mitotic metaphase plate congression, chromosome segregation, mitotic spindle elongation, mitotic spindle organization, kinetochore assembly, spindle assembly, mitosis, neurogenesis	WBGene00001831	hcp-3	nucleosome assembly, embryo development ending in birth or egg hatching, embryo development ending in birth or egg hatching, embryo development ending in birth or egg hatching, embryo development ending in birth or egg hatching, reproduction, embryo development ending in birth or egg hatching, embryo development ending in birth or egg hatching, embryo development ending in birth or egg hatching, …
FBgn0034141	CG8311	dolichyl monophosphate biosynthetic process	WBGene00044233	Y56A3A.36	dolichyl monophosphate biosynthetic process
FBgn0039943	CG17168		WBGene00016323	C32E8.5	positive regulation of growth rate, embryo development ending in birth or egg hatching, reproduction, embryo development ending in birth or egg hatching, growth, nematode larval development, body morphogenesis, locomotion, embryo development ending in birth or egg hatching, growth, nematode larval development, body morphogenesis, locomotion, embryo development ending in birth or egg hatching, rec…
FBgn0030606			WBGene00010670	K08E4.6	transport
FBgn0037603	CG11753		WBGene00020193	T03F1.12
FBgn0031309	Tfb4	promoter clearance from RNA polymerase II promoter, transcription from RNA polymerase II promoter, transcription initiation from RNA polymerase II promoter, transcription initiation from RNA polymerase II promoter, nucleotide-excision repair, response to UV, transcriptional open complex formation at RNA polymerase II promoter, regulation of transcription, DNA-dependent	WBGene00014230	ZK1128.4	nucleotide-excision repair, regulation of transcription, DNA-dependent, embryo development ending in birth or egg hatching, positive regulation of growth rate, embryo development ending in birth or egg hatching, reproduction, embryo development ending in birth or egg hatching
FBgn0032451	spict	magnesium ion transport, negative regulation of BMP signaling pathway, negative regulation of synaptic growth at neuromuscular junction, imaginal disc-derived wing morphogenesis	WBGene00021820	nipa-1	magnesium ion transport, adult locomotory behavior
FBgn0034964	IntS1	snRNA 3'-end processing, snRNA processing	WBGene00015499	C06A5.1	embryo development ending in birth or egg hatching, body morphogenesis, hermaphrodite genitalia development, embryo development, gastrulation with mouth forming first, embryo development ending in birth or egg hatching, body morphogenesis, hermaphrodite genitalia development, embryo development ending in birth or egg hatching, hermaphrodite genitalia development, reproduction, embryo development …
FBgn0030053	CG12081		WBGene00009978	F53E4.1	reproduction
FBgn0005655	mus209	mismatch repair, DNA-dependent DNA replication, nucleotide-excision repair, leading strand elongation, mitotic spindle organization, DNA replication, eggshell chorion gene amplification, DNA replication, regulation of DNA replication, antimicrobial humoral response, neurogenesis	WBGene00003955	pcn-1	regulation of DNA replication, regulation of DNA replication, regulation of DNA replication, embryo development ending in birth or egg hatching, reproduction, cell division, cytokinesis, embryo development ending in birth or egg hatching, oogenesis, reproduction, apoptosis
FBgn0034186	CG8950		WBGene00014114	tftc-3	positive regulation of growth rate, positive regulation of growth rate, receptor-mediated endocytosis, negative regulation of vulval development, negative regulation of vulval development, negative regulation of vulval development
FBgn0031061	CG14232	transport	WBGene00012765	Y41E3.7	transport
FBgn0030342	CG10347		WBGene00016654	C44E4.5	lipid storage
FBgn0026738	CG7857		WBGene00009007	otub-3
FBgn0034537	DMAP1	negative regulation of transcription, DNA-dependent, histone H4 acetylation, DNA repair, histone H2A acetylation, chromatin remodeling, phagocytosis, engulfment	WBGene00013676	ekl-4	negative regulation of transcription, DNA-dependent, positive regulation of growth rate, embryo development ending in birth or egg hatching, embryo development, gastrulation with mouth forming first, reproduction, embryo development ending in birth or egg hatching, positive regulation of growth rate, reproduction, positive regulation of growth rate, embryo development ending in birth or egg hatch…
FBgn0259676	DNApol-alpha60	DNA replication, DNA replication, DNA-dependent DNA replication, DNA replication, mitotic cell cycle, DNA replication, synthesis of RNA primer	WBGene00004181	pri-2	DNA replication, synthesis of RNA primer, embryo development ending in birth or egg hatching, hermaphrodite genitalia development, nucleus organization, embryo development ending in birth or egg hatching, embryo development ending in birth or egg hatching, cell division, cytokinesis, embryo development ending in birth or egg hatching, embryo development ending in birth or egg hatching, reproducti…
FBgn0030646	CG9203	DNA repair	WBGene00011834	dvc-1	DNA repair, reproduction, reproduction, growth, nematode larval development, apoptosis, oogenesis
FBgn0033236	CG14764		WBGene00017708	F22E5.9
FBgn0031519	CG3326	microtubule severing, mitotic sister chromatid segregation, mitotic anaphase A	WBGene00017981	figl-1	ATP catabolic process, positive regulation of mitotic cell cycle, ATP catabolic process
FBgn0037144	CG7458	transmembrane transport	WBGene00022348	Y82E9BR.16	transmembrane transport, embryo development ending in birth or egg hatching, growth, nematode larval development
FBgn0037624	CG8223	biological_process	WBGene00008218	nasp-2	embryo development ending in birth or egg hatching, locomotion
FBgn0031188	CG14613		WBGene00013239	Y56A3A.22
FBgn0010280	Taf4	transcription initiation from RNA polymerase II promoter, regulation of transcription, DNA-dependent, regulation of transcription, DNA-dependent, transcription initiation from RNA polymerase II promoter, transcription initiation from RNA polymerase II promoter, muscle organ development, dendrite morphogenesis, positive regulation of transcription from RNA polymerase II promoter, neurogenesis	WBGene00006385	taf-4	regulation of transcription, DNA-dependent, transcription initiation, DNA-dependent, positive regulation of growth rate, embryo development ending in birth or egg hatching, locomotion, reproduction, embryo development ending in birth or egg hatching, nematode larval development, growth, nematode larval development, embryo development ending in birth or egg hatching, protein phosphorylation, embry…
FBgn0261458	capt	bristle morphogenesis, oogenesis, compound eye development, actin polymerization or depolymerization, regulation of cell shape, oocyte microtubule cytoskeleton polarization, actin filament organization, actin filament organization, cell morphogenesis, wing disc dorsal/ventral pattern formation, actin filament organization, cell morphogenesis, muscle cell homeostasis, photoreceptor cell axon guida…	WBGene00015975	cas-2	cytoskeleton organization, cytoskeleton organization, cytoskeleton organization, cell morphogenesis
FBgn0038722	Nup58	nucleocytoplasmic transport, neuron projection morphogenesis	WBGene00003790	npp-4	positive regulation of growth rate, embryo development ending in birth or egg hatching, hermaphrodite genitalia development, reproduction, positive regulation of growth rate, embryo development ending in birth or egg hatching, embryo development ending in birth or egg hatching, embryo development ending in birth or egg hatching, receptor-mediated endocytosis, positive regulation of growth rate, e…
FBgn0030871	CG8142	DNA replication, cytoplasmic microtubule organization, lateral inhibition	WBGene00004340	rfc-4	embryo development ending in birth or egg hatching, embryo development ending in birth or egg hatching, embryo development ending in birth or egg hatching, reproduction, cell division, cytokinesis, positive regulation of growth rate, embryo development ending in birth or egg hatching, embryo development ending in birth or egg hatching, embryo development ending in birth or egg hatching, positive …
FBgn0037382	Hpr1	signal transduction, mRNA export from nucleus, mRNA export from nucleus in response to heat stress	WBGene00020172	thoc-1
FBgn0053936			WBGene00009050	F22D6.2
FBgn0039403	Sld5	mitotic cell cycle, neurogenesis, lateral inhibition	WBGene00013768	Y113G7B.24	embryo development ending in birth or egg hatching
FBgn0029512	Aos1	positive regulation of NF-kappaB transcription factor activity, protein sumoylation, SMT3-dependent protein catabolic process, neurogenesis, regulation of mitotic cell cycle, protein sumoylation	WBGene00000142	aos-1	positive regulation of embryonic development, embryo development ending in birth or egg hatching, embryo development ending in birth or egg hatching, growth, nematode larval development, embryo development ending in birth or egg hatching, oogenesis, embryo development ending in birth or egg hatching, oogenesis, reproduction, protein sumoylation
FBgn0033264	Nup50	phagocytosis, engulfment, SMAD protein import into nucleus, neurogenesis	WBGene00003802	npp-16	intracellular transport, RNA interference
FBgn0026238	gus	dorsal appendage formation, oocyte anterior/posterior axis specification, intracellular signal transduction	WBGene00021596	spsb-2
FBgn0043010	Fsn	negative regulation of synaptic growth at neuromuscular junction, neuromuscular synaptic transmission	WBGene00001499	fsn-1
FBgn0015282	Pros26.4	proteolysis, ubiquitin-dependent protein catabolic process, proteolysis, proteolysis, proteolysis, proteasomal ubiquitin-dependent protein catabolic process, protein catabolic process, cellular process, mitotic spindle organization, mitotic spindle elongation, cell proliferation, response to DNA damage stimulus	WBGene00004502	rpt-2	protein catabolic process, embryo development ending in birth or egg hatching, reproduction, embryo development ending in birth or egg hatching, embryo development ending in birth or egg hatching, determination of adult lifespan
FBgn0030607	dob	lipid metabolic process	WBGene00015484	C05D11.7	lipid metabolic process, metabolic process
FBgn0000173	ben	jump response, axonogenesis, grooming behavior, axon target recognition, photoreceptor cell morphogenesis, flight behavior, grooming behavior, protein ubiquitination, response to anesthetic	WBGene00006708	ubc-13	embryo development ending in birth or egg hatching, regulation of protein localization at cell surface
FBgn0023517	Pgam5	peptidyl-threonine dephosphorylation, response to anesthetic, positive regulation of mitochondrial fission, regulation of mitochondrion organization, regulation of mitochondrion organization, response to heat	WBGene00019941	pgam-5
FBgn0030802	CG9099	translational initiation	WBGene00012932	Y47D3A.21	translational initiation
FBgn0035435	CG12077	GPI anchor biosynthetic process, phagocytosis, engulfment, neuron projection morphogenesis	WBGene00011860	T20D3.8	GPI anchor biosynthetic process
FBgn0250837	dUTPase	dUTP metabolic process	WBGene00010609	dut-1	dUTP metabolic process, dUTP metabolic process, reproduction, embryo development ending in birth or egg hatching, cell division, cytokinesis, reproduction, embryo development ending in birth or egg hatching, embryo development ending in birth or egg hatching, reproduction, embryo development ending in birth or egg hatching, apoptosis, apoptosis, apoptosis, apoptosis, autophagy, necrotic cell death
FBgn0024314	Plap	biological_process	WBGene00007333	ufd-3	embryo development ending in birth or egg hatching, positive regulation of growth rate
FBgn0037339	Pi4KIIalpha	phosphatidylinositol phosphorylation, secretory granule localization	WBGene00008346	C56A3.8	nematode larval development, reproduction, growth, nematode larval development, embryo development ending in birth or egg hatching, growth, nematode larval development, apoptosis
FBgn0050476	ave	signal transduction, epidermal growth factor receptor signaling pathway, compound eye photoreceptor cell differentiation, compound eye cone cell differentiation	WBGene00044341	ave-1
FBgn0027094	Aats-ala	alanyl-tRNA aminoacylation	WBGene00000197	aars-2	tRNA aminoacylation, alanyl-tRNA aminoacylation, alanyl-tRNA aminoacylation, positive regulation of growth rate, embryo development ending in birth or egg hatching, reproduction, embryo development ending in birth or egg hatching, reproduction, embryo development ending in birth or egg hatching, growth, nematode larval development, locomotion, growth, nematode larval development, embryo developme…
FBgn0011836	Taf2	transcription from RNA polymerase II promoter, regulation of transcription, DNA-dependent, transcription initiation from RNA polymerase II promoter, transcription initiation from RNA polymerase II promoter, positive regulation of JAK-STAT cascade, neurogenesis	WBGene00006383	taf-2	embryo development ending in birth or egg hatching, positive regulation of transcription from RNA polymerase II promoter, embryo development ending in birth or egg hatching
FBgn0040239	bc10	biological_process	WBGene00022273	Y73E7A.6
FBgn0031997	CG8455	biological_process	WBGene00015238	B0511.13	growth, nematode larval development, gamete generation
FBgn0002791	mr	mitotic anaphase, regulation of cell cycle, negative regulation of synaptic growth at neuromuscular junction, regulation of synaptic transmission, anaphase-promoting complex-dependent proteasomal ubiquitin-dependent protein catabolic process	WBGene00000143	apc-2	ubiquitin-dependent protein catabolic process, ubiquitin-dependent protein catabolic process, embryo development ending in birth or egg hatching, embryo development ending in birth or egg hatching, embryo development ending in birth or egg hatching, reproduction, meiosis, reproduction, meiosis, embryo development ending in birth or egg hatching, embryo development ending in birth or egg hatching,…
FBgn0051159	EF-G2	translational elongation	WBGene00022491	Y119D3B.14
FBgn0040346	CG3704		WBGene00001661	gop-2	embryo development ending in birth or egg hatching, embryo development ending in birth or egg hatching, positive regulation of growth rate, embryo development ending in birth or egg hatching, growth, nematode larval development, reproduction, embryo development ending in birth or egg hatching, positive regulation of growth rate, embryo development ending in birth or egg hatching, hermaphrodite ge…
FBgn0000146	aub	oogenesis, dorsal appendage formation, stem cell division, cystoblast division, regulation of oskar mRNA translation, oogenesis, positive regulation of oskar mRNA translation, regulation of translational initiation, pole cell formation, regulation of oskar mRNA translation, karyosome formation, maintenance of pole plasm mRNA location, oocyte maturation, targeting of mRNA for destruction involved …	WBGene00004178	prg-1	gonad development, germline cell cycle switching, mitotic to meiotic cell cycle, reproduction, positive regulation of mitosis, germ-line stem cell division, spermatogenesis, 21U-RNA metabolic process, germ-line stem cell division, gamete generation
FBgn0004872	piwi	female germ-line stem cell division, stem cell division, male germ-line stem cell division, germ-line stem cell maintenance, cell fate determination, germ-line stem cell division, posttranscriptional gene silencing, chromatin silencing, germ-line stem cell maintenance, germ-line stem cell division, RNA interference, chromatin silencing, negative regulation of transposition, DNA-mediated, chromati…	WBGene00004178	prg-1	gonad development, germline cell cycle switching, mitotic to meiotic cell cycle, reproduction, positive regulation of mitosis, germ-line stem cell division, spermatogenesis, 21U-RNA metabolic process, germ-line stem cell division, gamete generation
FBgn0027548	nito	nuclear mRNA splicing, via spliceosome, neurogenesis, compound eye development, positive regulation of Wnt receptor signaling pathway, wing disc pattern formation, positive regulation of Wnt receptor signaling pathway, positive regulation of Wnt receptor signaling pathway	WBGene00017929	grld-1
FBgn0032688	CG15160		WBGene00009451	cids-2	negative regulation of vulval development, mRNA 3'-end processing
FBgn0037893			WBGene00006889	pfd-3	protein folding, embryo development ending in birth or egg hatching, pronuclear migration, embryo development ending in birth or egg hatching, embryo development ending in birth or egg hatching, morphogenesis of an epithelium, embryo development ending in birth or egg hatching, hermaphrodite genitalia development, reproduction, embryo development ending in birth or egg hatching, receptor-mediated…
FBgn0011297	l(2)not		WBGene00010720	K09E4.2
FBgn0037368	CG1239	neurogenesis	WBGene00012469	Y17G7B.18	embryo development ending in birth or egg hatching, growth, nematode larval development, positive regulation of growth rate, locomotion, reproduction, embryo development ending in birth or egg hatching
FBgn0039125	CG5857	neurogenesis, nuclear pore complex assembly	WBGene00007118	npp-22	embryo development ending in birth or egg hatching, embryo development ending in birth or egg hatching
FBgn0038376	Hmt-1	heme transport, cadmium ion transmembrane transport, response to cadmium ion, detoxification of cadmium ion	WBGene00001815	hmt-1	transport, transport, transmembrane transport, transmembrane transport, response to cadmium ion, cadmium ion transmembrane transport, detoxification of cadmium ion, detoxification of copper ion, detoxification of copper ion
FBgn0051694	CG31694	positive regulation of JAK-STAT cascade	WBGene00010232	F58B3.6
FBgn0032924	Nbr		WBGene00003504	mut-7	nucleobase-containing compound metabolic process, growth, nematode larval development, RNA interference, RNA interference, embryo development ending in birth or egg hatching, RNA interference, negative regulation of transposition, DNA-mediated, gene silencing
FBgn0032924	Nbr		WBGene00013256	Y57A10A.13	nucleobase-containing compound metabolic process
FBgn0015925	csul	mitosis, pole plasm assembly, protein methylation, intracellular mRNA localization, pole plasm assembly, P granule organization, pole plasm protein localization, pole plasm assembly	WBGene00016408	prmt-5	protein methylation, protein methylation, response to DNA damage stimulus, DNA damage response, signal transduction resulting in induction of apoptosis, negative regulation of DNA damage response, signal transduction by p53 class mediator, histone arginine methylation, negative regulation of transcription, DNA-dependent
FBgn0030276	Dlic	microtubule-based movement, dendrite morphogenesis, dendrite morphogenesis, mitotic spindle organization, axon cargo transport, regulation of dendrite morphogenesis, microtubule cytoskeleton organization, oogenesis, dendrite morphogenesis, axonogenesis, mitosis	WBGene00001007	dli-1	morphogenesis of an epithelium, embryo development ending in birth or egg hatching, hermaphrodite genitalia development, negative regulation of vulval development, embryo development ending in birth or egg hatching, locomotion, hermaphrodite genitalia development, embryo development ending in birth or egg hatching, pronuclear migration, reproduction, reproduction, reproduction, receptor-mediated …
FBgn0031606	CG15439	lateral inhibition	WBGene00013339	phf-14
FBgn0028690	Rpn5	proteolysis, proteolysis, proteolysis, proteasomal ubiquitin-dependent protein catabolic process	WBGene00004461	rpn-5	embryo development ending in birth or egg hatching, embryo development ending in birth or egg hatching, embryo development ending in birth or egg hatching, reproduction, embryo development ending in birth or egg hatching, reproduction
FBgn0027054	CSN4	compound eye photoreceptor cell differentiation, protein deneddylation, protein stabilization, negative regulation of proteasomal ubiquitin-dependent protein catabolic process, mitotic cell cycle G2/M transition DNA damage checkpoint, lateral inhibition	WBGene00000816	csn-4	embryo development ending in birth or egg hatching, growth, nematode larval development, locomotion, embryo development ending in birth or egg hatching, embryo development ending in birth or egg hatching, embryo development ending in birth or egg hatching, cytokinesis, embryo development ending in birth or egg hatching, reproduction, embryo development ending in birth or egg hatching, embryo deve…
FBgn0004957	por	regulation of Wnt receptor signaling pathway, protein secretion, regulation of Wnt receptor signaling pathway, protein lipidation	WBGene00003394	mom-1	endodermal cell fate specification, Wnt receptor signaling pathway, regulating spindle positioning, endodermal cell fate specification, embryo development ending in birth or egg hatching, embryonic morphogenesis, Wnt receptor signaling pathway, regulating spindle positioning, regulation of asymmetric cell division, asymmetric protein localization involved in cell fate determination, protein palmi…
FBgn0038313	CG4338		WBGene00018679	F52C12.2	lipid storage
FBgn0046114	Gclm	positive regulation of glutamate-cysteine ligase activity, glutathione biosynthetic process, learning or memory, olfactory learning, positive regulation of glutamate-cysteine ligase activity, glutathione biosynthetic process, glutathione biosynthetic process, behavioral response to ethanol, detoxification of arsenic-containing substance, response to DNA damage stimulus, long-term memory	WBGene00017084	E01A2.1	lipid storage
FBgn0029152	Mkrn1		WBGene00021924	Y55F3AM.6
FBgn0026143	CDC45L	DNA replication, DNA replication, DNA replication, DNA amplification, DNA-dependent DNA replication initiation, DNA-dependent DNA replication initiation, chromosome condensation, neuron projection morphogenesis, mitotic cell cycle G2/M transition DNA damage checkpoint, mitotic cell cycle G2/M transition DNA damage checkpoint, neurogenesis	WBGene00009372	evl-18	DNA-dependent DNA replication initiation, embryo development ending in birth or egg hatching, embryo development ending in birth or egg hatching, embryo development ending in birth or egg hatching, embryo development ending in birth or egg hatching
FBgn0030943	CG6540	transmembrane transport, nuclear pore organization, imaginal disc-derived wing morphogenesis	WBGene00003805	npp-19	embryo development ending in birth or egg hatching, embryo development ending in birth or egg hatching, embryo development ending in birth or egg hatching, embryo development ending in birth or egg hatching, embryo development ending in birth or egg hatching, embryo development ending in birth or egg hatching, nucleus organization, nuclear import, embryo development ending in birth or egg hatchin…
FBgn0259937	Nop60B	ribosome biogenesis, rRNA processing, pseudouridine synthesis, rRNA processing, germ cell development, wing disc development, neurogenesis	WBGene00010478	K01G5.5	RNA processing, RNA processing, pseudouridine synthesis, RNA modification, growth, nematode larval development, positive regulation of growth rate, positive regulation of growth rate, reproduction
FBgn0037702	CG8176		WBGene00018974	F56D12.6
FBgn0033473	CG12128	biological_process	WBGene00015160	B0361.6	growth, nematode larval development, positive regulation of growth rate, growth, nematode larval development, embryo development ending in birth or egg hatching, receptor-mediated endocytosis
FBgn0027499	wde		WBGene00002027	hsr-9	lipid storage, morphogenesis of an epithelium, reproduction, morphogenesis of an epithelium, morphogenesis of an epithelium, growth, nematode larval development, reproduction, reproduction, reproduction, reproduction, reproduction, hermaphrodite genitalia development, reproduction, reproduction, growth, nematode larval development
FBgn0028692	Rpn2	proteolysis, proteolysis, proteolysis, proteasomal ubiquitin-dependent protein catabolic process, regulation of protein catabolic process, response to DNA damage stimulus	WBGene00004459	rpn-2	regulation of protein catabolic process, embryo development ending in birth or egg hatching, embryo development ending in birth or egg hatching, reproduction, embryo development ending in birth or egg hatching, embryo development ending in birth or egg hatching, nematode larval development, embryo development ending in birth or egg hatching, embryo development ending in birth or egg hatching, det…
FBgn0030739	CG13957		WBGene00013167	Y53F4B.21
FBgn0010339	128up		WBGene00012126	T28D6.6	embryo development ending in birth or egg hatching, nematode larval development, growth, nematode larval development, reproduction, embryo development ending in birth or egg hatching, growth, nematode larval development, growth, embryo development ending in birth or egg hatching, growth, nematode larval development, growth, embryo development ending in birth or egg hatching, growth, nematode larv…
FBgn0038300	CG4203	maintenance of mitotic sister chromatid cohesion, axon guidance	WBGene00003136	mau-2	embryo development ending in birth or egg hatching, reproduction, embryo development ending in birth or egg hatching, embryo development ending in birth or egg hatching, oviposition, dorsal/ventral axon guidance, anterior/posterior axon guidance
FBgn0035640	mad2	mitotic cell cycle spindle assembly checkpoint, cell cycle, mitotic cell cycle checkpoint, mitotic cell cycle spindle assembly checkpoint, mitotic cell cycle spindle assembly checkpoint, regulation of spindle checkpoint	WBGene00003161	mdf-2	locomotion, locomotion, hermaphrodite genitalia development, embryo development ending in birth or egg hatching, embryo development ending in birth or egg hatching, embryo development ending in birth or egg hatching, mitotic cell cycle spindle assembly checkpoint, response to stress
FBgn0033886	CG13349	proteasomal ubiquitin-dependent protein catabolic process, proteasome assembly, ubiquitin-dependent protein catabolic process, lateral inhibition	WBGene00016981	C56G2.7
FBgn0033686	Hen1	RNA methylation, posttranscriptional gene silencing by RNA, RNA methylation, RNA methylation	WBGene00015349	henn-1	RNA methylation
FBgn0031768	CG12393		WBGene00012560	Y37D8A.25
FBgn0036838	CG3808	RNA processing	WBGene00019241	H24K24.4
FBgn0037660	CG18005	nuclear mRNA splicing, via spliceosome, neuromuscular junction development, terminal button organization, neuromuscular synaptic transmission	WBGene00004896	smu-2	lipid metabolic process, lipid storage, embryo development ending in birth or egg hatching, embryo development ending in birth or egg hatching, mechanosensory behavior, neuron development, embryo development ending in birth or egg hatching, embryo development ending in birth or egg hatching, nematode larval development, locomotion, muscle organ morphogenesis

## Sheet: WEE_50-60-FEmbryo0-2h
fly gene ID	fly gene name	fly GO terms	worm gene ID	worm gene name	worm GO terms
FBgn0015754	Lis-1	germarium-derived oocyte differentiation, female germ-line cyst formation, fusome organization, oogenesis, regulation of catalytic activity, protein localization, germarium-derived oocyte fate determination, nucleus localization, oocyte fate determination, cytoplasmic transport, nurse cell to oocyte, oogenesis, oocyte nucleus migration involved in oocyte dorsal/ventral axis specification, chorion…	WBGene00003047	lis-1	embryo development ending in birth or egg hatching, embryo development ending in birth or egg hatching, locomotion, vulval development, reproduction, pronuclear migration, embryo development ending in birth or egg hatching, embryo development ending in birth or egg hatching, embryo development ending in birth or egg hatching, pronuclear migration, mitotic spindle organization, embryo development …
FBgn0032223	GATAd	regulation of transcription, DNA-dependent	WBGene00001311	end-3	regulation of transcription, DNA-dependent, regulation of transcription, DNA-dependent, mesodermal cell fate specification, endodermal cell fate specification, endodermal cell fate specification, endodermal cell fate specification, endodermal cell fate specification, endodermal cell fate specification, endodermal cell fate specification
FBgn0015929	dpa	DNA replication, DNA replication, DNA endoreduplication, DNA replication, DNA replication, mitotic spindle organization, DNA replication, DNA-dependent DNA replication initiation	WBGene00003156	mcm-4	DNA replication, DNA-dependent DNA replication initiation, embryo development ending in birth or egg hatching, nucleus organization, embryo development ending in birth or egg hatching, growth, nematode larval development, embryo development ending in birth or egg hatching, embryo development ending in birth or egg hatching, embryo development ending in birth or egg hatching, nucleus organization,…
FBgn0033890	Ctf4	DNA endoreduplication, mitotic cell cycle, preblastoderm mitotic cell cycle	WBGene00008921	F17C11.10	embryo development ending in birth or egg hatching, meiotic chromosome segregation
FBgn0029756	CG3309		WBGene00018777	F53H1.3	determination of adult lifespan
FBgn0041627	Ku80	double-strand break repair via nonhomologous end joining, DNA recombination, telomere maintenance	WBGene00000520	cku-80	double-strand break repair via nonhomologous end joining, double-strand break repair via nonhomologous end joining, double-strand break repair via nonhomologous end joining, telomere maintenance, DNA recombination, response to stress, growth
FBgn0041186	Slbp	histone mRNA metabolic process, histone mRNA 3'-end processing, cell cycle, histone mRNA 3'-end processing, cell cycle, histone mRNA 3'-end processing, histone mRNA 3'-end processing, histone mRNA 3'-end processing, histone mRNA 3'-end processing, histone mRNA 3'-end processing	WBGene00000411	cdl-1	embryo development ending in birth or egg hatching, positive regulation of growth rate, morphogenesis of an epithelium, embryo development ending in birth or egg hatching, body morphogenesis, embryo development ending in birth or egg hatching, reproduction, hermaphrodite genitalia development, embryo development ending in birth or egg hatching, RNA interference, pharynx development, reproduction,…
FBgn0034068	casp	negative regulation of biosynthetic process of antibacterial peptides active against Gram-negative bacteria, negative regulation of proteolysis, negative regulation of peptidoglycan recognition protein signaling pathway	WBGene00018586	ubxn-3	embryo development ending in birth or egg hatching
FBgn0021761	Nup154	nucleocytoplasmic transport	WBGene00003794	npp-8	nucleocytoplasmic transport, embryo development ending in birth or egg hatching, embryo development ending in birth or egg hatching, hermaphrodite genitalia development, embryo development ending in birth or egg hatching, hermaphrodite genitalia development, embryo development ending in birth or egg hatching, embryo development ending in birth or egg hatching, embryo development ending in birth o…
FBgn0037383	CG2023		WBGene00018239	sec-20	positive regulation of growth rate, molting cycle, collagen and cuticulin-based cuticle, locomotion, locomotion, growth, nematode larval development, locomotion, molting cycle, collagen and cuticulin-based cuticle, receptor-mediated endocytosis, secretion by cell, secretion by cell, secretion by cell, secretion by cell
FBgn0039153	CG5463	glutaminyl-tRNA aminoacylation	WBGene00016524	C39B5.6
FBgn0011704	RnrS	DNA replication, oxidation-reduction process, deoxyribonucleoside diphosphate metabolic process, activation of caspase activity, neurogenesis	WBGene00004392	rnr-2	deoxyribonucleoside diphosphate metabolic process, oxidation-reduction process, oxidation-reduction process, oxidation-reduction process, embryo development ending in birth or egg hatching, embryo development ending in birth or egg hatching, morphogenesis of an epithelium, embryo development ending in birth or egg hatching, determination of adult lifespan, hermaphrodite genitalia development, emb…
FBgn0035424	CG11505	biological_process	WBGene00004147	larp-5
FBgn0001179	hay	adult locomotory behavior, response to UV, nucleotide-excision repair, nucleotide-excision repair, transcriptional open complex formation at RNA polymerase II promoter, promoter clearance from RNA polymerase II promoter, transcription initiation from RNA polymerase II promoter, transcription initiation from RNA polymerase II promoter, regulation of alternative nuclear mRNA splicing, via spliceoso…	WBGene00013441	Y66D12A.15	nucleotide-excision repair, embryo development ending in birth or egg hatching, embryo development ending in birth or egg hatching
FBgn0024920	Ts	deoxyribonucleotide biosynthetic process, dTMP biosynthetic process, neurogenesis	WBGene00022455	Y110A7A.4	dTMP biosynthetic process, embryo development ending in birth or egg hatching, body morphogenesis, embryo development ending in birth or egg hatching, embryo development ending in birth or egg hatching, embryo development ending in birth or egg hatching, embryo development ending in birth or egg hatching, embryo development ending in birth or egg hatching, embryo development ending in birth or eg…
FBgn0033935	Sin1	regulation of protein phosphorylation, regulation of protein phosphorylation, dendrite morphogenesis, synaptic growth at neuromuscular junction, synaptic growth at neuromuscular junction	WBGene00013261	sinh-1	determination of adult lifespan, determination of adult lifespan, lipid storage
FBgn0038464	CG16941	nuclear mRNA splicing, via spliceosome, nuclear mRNA splicing, via spliceosome, nuclear mRNA splicing, via spliceosome, regulation of alternative nuclear mRNA splicing, via spliceosome, mitotic spindle organization, mitosis, nuclear mRNA splicing, via spliceosome	WBGene00004188	prp-21	RNA processing, embryo development ending in birth or egg hatching, morphogenesis of an epithelium, embryo development ending in birth or egg hatching, hermaphrodite genitalia development, embryo development ending in birth or egg hatching, collagen and cuticulin-based cuticle development, reproduction, hermaphrodite genitalia development, embryo development ending in birth or egg hatching, RNA i…
FBgn0015546	spel1	mismatch repair, maintenance of DNA repeat elements, mismatch repair, maintenance of DNA repeat elements, mismatch repair, maintenance of DNA repeat elements, mismatch repair, postreplication repair, meiotic gene conversion, intra-S DNA damage checkpoint, DNA damage response, signal transduction by p53 class mediator resulting in induction of apoptosis, double-strand break repair, postreplication…	WBGene00003418	msh-2	mismatch repair, mismatch repair, mismatch repair, mismatch repair, mismatch repair, response to DNA damage stimulus, response to DNA damage stimulus, reproduction, maintenance of DNA repeat elements, maintenance of DNA repeat elements, DNA damage response, signal transduction by p53 class mediator resulting in induction of apoptosis, maintenance of DNA repeat elements, maintenance of DNA repeat …
FBgn0032340	Ge-1	cytoplasmic mRNA processing body assembly, defense response to fungus, pole plasm oskar mRNA localization, cytoplasmic mRNA processing body assembly	WBGene00021551	Y44E3A.6
FBgn0023522	CG11596	biological_process	WBGene00013015	Y48E1C.2
FBgn0037252	CG14650	response to heat	WBGene00001023	dnj-5
FBgn0029818	CG3033	attachment of GPI anchor to protein	WBGene00018006	hpo-3
FBgn0034908	CG5543	neurogenesis	WBGene00001513	gad-1	embryo development ending in birth or egg hatching, embryo development ending in birth or egg hatching, embryo development ending in birth or egg hatching, embryo development ending in birth or egg hatching, embryo development ending in birth or egg hatching, embryo development ending in birth or egg hatching, cell migration involved in gastrulation, establishment of mitotic spindle orientation, …
FBgn0033737	Nup54	nucleocytoplasmic transport, protein targeting, NLS-bearing substrate import into nucleus, NLS-bearing substrate import into nucleus, protein import into nucleus	WBGene00003787	npp-1	embryo development ending in birth or egg hatching, cell division, cytokinesis, embryo development ending in birth or egg hatching, embryo development ending in birth or egg hatching, embryo development ending in birth or egg hatching, RNA interference, receptor-mediated endocytosis, embryo development ending in birth or egg hatching, reproduction, embryo development ending in birth or egg hatchi…
FBgn0039861	pasha	primary miRNA processing, primary miRNA processing, primary miRNA processing, gene silencing by miRNA, imaginal disc growth, primary miRNA processing, germarium-derived oocyte fate determination, germarium-derived female germ-line cyst formation	WBGene00011908	pash-1	embryo development ending in birth or egg hatching, growth, nematode larval development, body morphogenesis, negative regulation of vulval development, morphogenesis of an epithelium, hermaphrodite genitalia development, locomotion, primary miRNA processing, regulation of development, heterochronic, hermaphrodite genitalia morphogenesis, morphogenesis of an epithelium, vulval development, regulat…
FBgn0000057	adp	carbohydrate metabolic process, carbohydrate metabolic process, lipid metabolic process, response to desiccation, lipid metabolic process, negative regulation of sequestering of triglyceride, negative regulation of sequestering of triglyceride, regulation of lipid storage	WBGene00044440	adpr-1	lipid storage
FBgn0033891	CG8067	metabolic process	WBGene00010721	K09E4.3
FBgn0260049	flr	actin filament depolymerization, actin polymerization or depolymerization, phagocytosis, engulfment, actin filament depolymerization, imaginal disc-derived wing hair organization, sarcomere organization	WBGene00010685	aipl-1	reproduction, actin filament organization, regulation of protein localization
FBgn0031696	Bub1	protein phosphorylation, protein phosphorylation, mitotic cell cycle spindle assembly checkpoint	WBGene00000275	bub-1	protein phosphorylation, morphogenesis of an epithelium, embryo development ending in birth or egg hatching, nematode larval development, hermaphrodite genitalia development, cell division, cytokinesis, embryo development ending in birth or egg hatching, embryo development ending in birth or egg hatching, locomotion, reproduction, embryo development ending in birth or egg hatching, reproduction, …
FBgn0011774	Irbp	double-strand break repair via nonhomologous end joining, telomere maintenance	WBGene00000519	cku-70	double-strand break repair via nonhomologous end joining, double-strand break repair via nonhomologous end joining, double-strand break repair via nonhomologous end joining, telomere maintenance, response to stress, determination of adult lifespan, determination of adult lifespan, determination of adult lifespan, determination of adult lifespan
FBgn0002673	twe	embryo development, cellularization, pole cell formation, male meiosis, regulation of syncytial blastoderm mitotic cell cycle, protein dephosphorylation, protein dephosphorylation, spindle assembly involved in male meiosis, spindle assembly involved in female meiosis, meiotic G2/MI transition, spermatogenesis, spermatogenesis, protein dephosphorylation, meiotic G2/MI transition, protein dephospho…	WBGene00000388	cdc-25.3	M phase of mitotic cell cycle, protein dephosphorylation, cell cycle
FBgn0002673	twe	embryo development, cellularization, pole cell formation, male meiosis, regulation of syncytial blastoderm mitotic cell cycle, protein dephosphorylation, protein dephosphorylation, spindle assembly involved in male meiosis, spindle assembly involved in female meiosis, meiotic G2/MI transition, spermatogenesis, spermatogenesis, protein dephosphorylation, meiotic G2/MI transition, protein dephospho…	WBGene00000386	cdc-25.1	M phase of mitotic cell cycle, protein dephosphorylation, reproduction, embryo development ending in birth or egg hatching, embryo development ending in birth or egg hatching, embryo development ending in birth or egg hatching, reproduction, embryo development ending in birth or egg hatching, embryo development ending in birth or egg hatching, embryo development ending in birth or egg hatching, m…
FBgn0003525	stg	G2/M transition of mitotic cell cycle, G2/M transition of mitotic cell cycle, protein dephosphorylation, gastrulation, mesoderm development, centriole replication, regulation of mitosis, open tracheal system development, gastrulation, peripheral nervous system development, protein dephosphorylation, regulation of mitotic cell cycle, G2/M transition of mitotic cell cycle, G2/M transition of mitoti…	WBGene00000388	cdc-25.3	M phase of mitotic cell cycle, protein dephosphorylation, cell cycle
FBgn0003525	stg	G2/M transition of mitotic cell cycle, G2/M transition of mitotic cell cycle, protein dephosphorylation, gastrulation, mesoderm development, centriole replication, regulation of mitosis, open tracheal system development, gastrulation, peripheral nervous system development, protein dephosphorylation, regulation of mitotic cell cycle, G2/M transition of mitotic cell cycle, G2/M transition of mitoti…	WBGene00000386	cdc-25.1	M phase of mitotic cell cycle, protein dephosphorylation, reproduction, embryo development ending in birth or egg hatching, embryo development ending in birth or egg hatching, embryo development ending in birth or egg hatching, reproduction, embryo development ending in birth or egg hatching, embryo development ending in birth or egg hatching, embryo development ending in birth or egg hatching, m…
FBgn0032194	CG4901	spliceosome disassembly, neurogenesis	WBGene00020263	T05E8.3	positive regulation of growth rate, hermaphrodite genitalia development, reproduction, positive regulation of growth rate, reproduction, positive regulation of growth rate, axonal fasciculation, locomotion, receptor-mediated endocytosis, positive regulation of growth rate, reproduction, hermaphrodite genitalia development
FBgn0037647	RagA	positive regulation of cell growth, regulation of autophagy, positive regulation of TOR signaling cascade, cellular response to starvation	WBGene00006414	raga-1	determination of adult lifespan, multicellular organism reproduction, positive regulation of TOR signaling cascade, determination of adult lifespan, positive regulation of multicellular organism growth, determination of adult lifespan, determination of adult lifespan, determination of adult lifespan
FBgn0030738	CG9915	transcription, DNA-dependent	WBGene00008729	F13B12.1	transcription, DNA-dependent, locomotion, reproduction
FBgn0015737	Hmu	biosynthetic process	WBGene00010197	F57C2.5	biosynthetic process
FBgn0035831	CG8038	rRNA processing, mRNA cleavage, tRNA processing	WBGene00007603	C15C6.4	rRNA processing, rRNA processing, mRNA cleavage, mRNA cleavage, tRNA processing, tRNA processing, positive regulation of growth rate, positive regulation of growth rate, positive regulation of growth rate, hermaphrodite genitalia development, reproduction
FBgn0040230	dbo	regulation of synapse organization, cell growth, neuron projection morphogenesis	WBGene00020030	R12E2.1
FBgn0039004	Nup133	mRNA export from nucleus, SMAD protein import into nucleus	WBGene00003801	npp-15	embryo development ending in birth or egg hatching, positive regulation of growth rate, embryo development ending in birth or egg hatching
FBgn0028685	Rpt4	proteolysis, proteolysis, proteolysis, proteasomal ubiquitin-dependent protein catabolic process, protein catabolic process, neurogenesis	WBGene00004504	rpt-4	protein catabolic process, positive regulation of growth rate, embryo development ending in birth or egg hatching, body morphogenesis, locomotion, reproduction, embryo development ending in birth or egg hatching, embryo development ending in birth or egg hatching, reproduction, nematode larval development, embryo development ending in birth or egg hatching, determination of adult lifespan, determ…
FBgn0038827	Fancd2	intra-S DNA damage checkpoint, DNA repair	WBGene00012767	fcd-2	embryo development ending in birth or egg hatching, embryo development ending in birth or egg hatching, fertilization, nucleotide-excision repair, regulation of DNA-dependent DNA replication
FBgn0087040	alphaTub67C	embryo development ending in birth or egg hatching, nuclear division, female pronucleus assembly, embryo development, central nervous system development, sperm aster formation, peripheral nervous system development, embryonic cleavage, pronuclear migration, microtubule-based process, protein polymerization, GTP catabolic process, mitotic spindle organization, mitotic spindle organization, centros…	WBGene00006529	tba-2	microtubule-based process, protein polymerization, protein polymerization, protein polymerization, GTP catabolic process, GTP catabolic process, embryo development ending in birth or egg hatching, mitotic spindle organization, embryo development ending in birth or egg hatching, embryo development ending in birth or egg hatching, nematode larval development, growth, nematode larval development, em…
FBgn0087040	alphaTub67C	embryo development ending in birth or egg hatching, nuclear division, female pronucleus assembly, embryo development, central nervous system development, sperm aster formation, peripheral nervous system development, embryonic cleavage, pronuclear migration, microtubule-based process, protein polymerization, GTP catabolic process, mitotic spindle organization, mitotic spindle organization, centros…	WBGene00006528	tba-1	microtubule-based process, protein polymerization, protein polymerization, protein polymerization, GTP catabolic process, GTP catabolic process, embryo development ending in birth or egg hatching, mitotic spindle organization, embryo development ending in birth or egg hatching, embryo development ending in birth or egg hatching, growth, nematode larval development, reproduction, pronuclear migrat…
FBgn0011289	TfIIA-L	positive regulation of transcription from RNA polymerase II promoter, transcription initiation from RNA polymerase II promoter, transcription initiation from RNA polymerase II promoter, transcription initiation from RNA polymerase II promoter, regulation of transcription from RNA polymerase II promoter	WBGene00004136	pqn-51	transcription initiation from RNA polymerase II promoter, transcription initiation from RNA polymerase II promoter, transcription initiation from RNA polymerase II promoter, transcription initiation from RNA polymerase II promoter, embryo development ending in birth or egg hatching
FBgn0000147	aur	mitotic centrosome separation, protein phosphorylation, asymmetric protein localization involved in cell fate determination, centrosome cycle, microtubule-based process, protein phosphorylation, regulation of neurogenesis, establishment of spindle orientation, asymmetric protein localization, asymmetric protein localization, regulation of neurogenesis, establishment of spindle orientation, centro…	WBGene00000099	air-2	protein phosphorylation, protein phosphorylation, embryo development ending in birth or egg hatching, meiosis, embryo development ending in birth or egg hatching, embryo development ending in birth or egg hatching, meiosis, embryo development ending in birth or egg hatching, hermaphrodite genitalia development, embryo development ending in birth or egg hatching, embryo development ending in birth…
FBgn0034722	Rtf1	transcription initiation, DNA-dependent, positive regulation of transcription, DNA-dependent, positive regulation of histone H3-K4 methylation, positive regulation of Notch signaling pathway	WBGene00009103	F25B3.6	transcription initiation, DNA-dependent, transcription initiation, DNA-dependent, histone modification, histone modification, positive regulation of growth rate, embryo development ending in birth or egg hatching, nematode larval development, body morphogenesis, reproduction, embryo development ending in birth or egg hatching, nematode larval development, growth, nematode larval development, loco…
FBgn0033995	CG8090		WBGene00013551	Y75B8A.16
FBgn0040078	pont	positive regulation of gene expression, spindle assembly involved in mitosis, mitotic cell cycle G2/M transition DNA damage checkpoint	WBGene00007784	ruvb-1	positive regulation of growth rate, embryo development ending in birth or egg hatching, growth, nematode larval development, body morphogenesis, reproduction, positive regulation of growth rate, embryo development ending in birth or egg hatching, hermaphrodite genitalia development, embryo development ending in birth or egg hatching, growth, nematode larval development, embryo development ending …
FBgn0034803	CG9849	muscle cell fate determination	WBGene00020322	T07F12.2
FBgn0035713	CG10107	proteolysis, proteolysis, central nervous system projection neuron axonogenesis, dendritic spine morphogenesis, protein desumoylation, negative regulation of cell death, axon guidance	WBGene00006737	ulp-2	proteolysis, positive regulation of growth rate, positive regulation of growth rate, reproduction, embryo development ending in birth or egg hatching, growth, nematode larval development, reproduction, reproduction, reproduction, growth, reproduction, reproduction, reproduction, growth, nematode larval development, reproduction
FBgn0030420	CG12717	proteolysis, imaginal disc-derived wing morphogenesis, central nervous system projection neuron axonogenesis, dendritic spine morphogenesis, protein desumoylation	WBGene00006737	ulp-2	proteolysis, positive regulation of growth rate, positive regulation of growth rate, reproduction, embryo development ending in birth or egg hatching, growth, nematode larval development, reproduction, reproduction, reproduction, growth, reproduction, reproduction, reproduction, growth, nematode larval development, reproduction
FBgn0034933	CG3735	neurogenesis	WBGene00012756	Y41C4A.9	positive regulation of growth rate, reproduction
FBgn0026175	skpC	ubiquitin-dependent protein catabolic process	WBGene00004808	skr-2	ubiquitin-dependent protein catabolic process, ubiquitin-dependent protein catabolic process, ubiquitin-dependent protein catabolic process, positive regulation of growth rate, embryo development ending in birth or egg hatching, locomotion, hermaphrodite genitalia development, embryo development ending in birth or egg hatching, oviposition, gonad development, embryo development ending in birth or…
FBgn0026175	skpC	ubiquitin-dependent protein catabolic process	WBGene00004820	skr-14	ubiquitin-dependent protein catabolic process, ubiquitin-dependent protein catabolic process, ubiquitin-dependent protein catabolic process
FBgn0026175	skpC	ubiquitin-dependent protein catabolic process	WBGene00004821	skr-15	ubiquitin-dependent protein catabolic process, ubiquitin-dependent protein catabolic process, ubiquitin-dependent protein catabolic process, positive regulation of growth rate, response to DNA damage stimulus
FBgn0026175	skpC	ubiquitin-dependent protein catabolic process	WBGene00004815	skr-9	ubiquitin-dependent protein catabolic process, ubiquitin-dependent protein catabolic process, ubiquitin-dependent protein catabolic process, positive regulation of growth rate, embryo development ending in birth or egg hatching, growth, nematode larval development, body morphogenesis, reproduction, embryo development ending in birth or egg hatching, growth, nematode larval development, reproducti…
FBgn0026175	skpC	ubiquitin-dependent protein catabolic process	WBGene00004813	skr-7	ubiquitin-dependent protein catabolic process, ubiquitin-dependent protein catabolic process, ubiquitin-dependent protein catabolic process, embryo development ending in birth or egg hatching, body morphogenesis, body morphogenesis, embryo development ending in birth or egg hatching, positive regulation of growth rate, embryo development ending in birth or egg hatching, growth, nematode larval de…
FBgn0027087	Aats-his	histidyl-tRNA aminoacylation, histidyl-tRNA aminoacylation	WBGene00002001	hars-1	histidyl-tRNA aminoacylation, positive regulation of growth rate, embryo development ending in birth or egg hatching, positive regulation of multicellular organism growth, reproduction, positive regulation of growth rate, embryo development ending in birth or egg hatching, growth, nematode larval development, embryo development ending in birth or egg hatching, receptor-mediated endocytosis, histi…
FBgn0260779	gatA	karyosome formation, oogenesis, translation	WBGene00021508	Y41D4A.6	lipid storage, lipid storage
FBgn0000182	BicC	ovarian follicle cell migration, oogenesis, negative regulation of oskar mRNA translation, oogenesis, oogenesis, negative regulation of oskar mRNA translation, negative regulation of oskar mRNA translation, mitosis, actin cytoskeleton organization, microtubule cytoskeleton organization	WBGene00001597	gld-3	embryo development ending in birth or egg hatching, reproduction, masculinization of hermaphroditic germ-line, regulation of cell proliferation, regulation of meiosis, regulation of cell proliferation, regulation of meiosis, germ cell development, regulation of cell proliferation, regulation of meiosis, regulation of cell proliferation, regulation of meiosis, germ cell development, germ cell deve…
FBgn0034614	CG9752	biological_process	WBGene00015702	C11D2.4
FBgn0037482	CG10055	biological_process	WBGene00021655	Y48A5A.1
FBgn0011566	Bzd	translational initiation	WBGene00009370	set-10	determination of adult lifespan
FBgn0261014	TER94	Golgi organization, regulation of pole plasm oskar mRNA localization, endoplasmic reticulum membrane fusion, microtubule cytoskeleton organization, endoplasmic reticulum organization, pole plasm oskar mRNA localization, oocyte microtubule cytoskeleton polarization, protein localization, rhabdomere development, positive regulation of proteasomal ubiquitin-dependent protein catabolic process, prote…	WBGene00008053	cdc-48.2	embryo development ending in birth or egg hatching, positive regulation of growth rate, locomotion, nematode larval development, embryo development ending in birth or egg hatching, embryo development ending in birth or egg hatching, cell division, cytokinesis, meiosis, endoplasmic reticulum unfolded protein response, embryo development ending in birth or egg hatching, embryo development ending in…
FBgn0015402	ksr	Ras protein signal transduction, anterior/posterior axis specification, embryo, torso signaling pathway, protein phosphorylation, protein phosphorylation, tracheal outgrowth, open tracheal system, signal transduction, imaginal disc-derived wing morphogenesis	WBGene00002240	ksr-2	protein phosphorylation, nematode larval development, vulval development, tail tip morphogenesis, meiotic cell cycle, Ras protein signal transduction, protein phosphorylation
FBgn0031456	Trn-SR	mRNA export from nucleus, protein import into nucleus, splicing factor protein import into nucleus, protein import into nucleus, regulation of nuclear mRNA splicing, via spliceosome, splicing factor protein import into nucleus, splicing factor protein import into nucleus, splicing factor protein import into nucleus, regulation of nuclear mRNA splicing, via spliceosome, splicing factor protein imp…	WBGene00006647	tsr-1	embryo development ending in birth or egg hatching, embryo development ending in birth or egg hatching, embryo development ending in birth or egg hatching, embryo development ending in birth or egg hatching
FBgn0261532	cdm	neuron-neuron synaptic transmission, phototaxis, intracellular protein transport, regulation of synaptic transmission	WBGene00011807	T16G12.6
FBgn0028507	CG3793	methylation	WBGene00007137	B0285.4	methylation
FBgn0032934	CG8679		WBGene00002276	lem-3	axonal fasciculation, dendrite development, response to UV, response to X-ray, reproduction, DNA catabolic process, endonucleolytic, response to DNA damage stimulus, response to X-ray, response to UV-C, DNA catabolic process, endonucleolytic, response to DNA damage stimulus, response to X-ray, embryo development ending in birth or egg hatching
FBgn0030365	Tango4	protein secretion, Golgi organization, nuclear mRNA splicing, via spliceosome	WBGene00006481	plrg-1	embryo development ending in birth or egg hatching, reproduction, embryo development ending in birth or egg hatching, nematode larval development, growth, nematode larval development, embryo development ending in birth or egg hatching, molting cycle, collagen and cuticulin-based cuticle, locomotion, reproduction, embryo development ending in birth or egg hatching, embryo development ending in bir…
FBgn0260985	RfC4	mitotic chromosome condensation, sister chromatid segregation, DNA repair, DNA replication, DNA strand elongation involved in DNA replication, DNA replication, DNA replication, DNA replication, female meiosis chromosome segregation, mitotic chromosome condensation, mitosis, DNA damage checkpoint, DNA replication checkpoint, DNA strand elongation involved in DNA replication, neurogenesis, lateral …	WBGene00004338	rfc-2	DNA replication, embryo development ending in birth or egg hatching, embryo development ending in birth or egg hatching, locomotion, reproduction, embryo development ending in birth or egg hatching
FBgn0051989	Cap-D3	mitotic chromosome condensation, male meiosis chromosome segregation, chromosome organization	WBGene00001833	hcp-6	mitotic chromosome condensation, mitotic chromosome condensation, embryo development ending in birth or egg hatching, embryo development ending in birth or egg hatching, embryo development ending in birth or egg hatching, growth, nematode larval development, reproduction, hermaphrodite genitalia development, reproduction, hermaphrodite genitalia development, reproduction, hermaphrodite genitalia …
FBgn0024371	E2f2	negative regulation of DNA replication, oocyte dorsal/ventral axis specification, oocyte anterior/posterior axis specification, negative regulation of DNA replication, DNA endoreduplication, DNA endoreduplication, oogenesis, imaginal disc development, G1/S transition of mitotic cell cycle, endomitotic cell cycle, negative regulation of transcription, DNA-dependent, negative regulation of transcri…	WBGene00001161	efl-1	regulation of transcription, DNA-dependent, negative regulation of vulval development, embryo development ending in birth or egg hatching, reproduction, gamete generation, negative regulation of vulval development, negative regulation of vulval development, negative regulation of Ras protein signal transduction, negative regulation of vulval development, embryonic digestive tract morphogenesis, e…
FBgn0058045	CG40045		WBGene00006704	ubc-7
FBgn0033846	mip120	eggshell chorion gene amplification, negative regulation of transcription from RNA polymerase II promoter, negative regulation of transcription from RNA polymerase II promoter, oogenesis, sperm motility, determination of adult lifespan	WBGene00003037	lin-54	positive regulation of growth rate, positive regulation of growth rate, hermaphrodite genitalia development, hermaphrodite genitalia development, embryo development ending in birth or egg hatching, negative regulation of vulval development, negative regulation of vulval development, negative regulation of vulval development, receptor-mediated endocytosis, regulation of transcription from RNA poly…
FBgn0015270	Orc2	DNA-dependent DNA replication, DNA replication, DNA-dependent DNA replication initiation, DNA-dependent DNA replication, chromatin silencing, DNA-dependent DNA replication, DNA replication, eggshell chorion gene amplification, DNA replication, mitotic spindle organization, mitotic chromosome condensation, chromosome condensation, DNA replication, eggshell chorion gene amplification, DNA replicati…	WBGene00003882	orc-2	DNA replication, embryo development ending in birth or egg hatching, positive regulation of multicellular organism growth, hermaphrodite genitalia development, negative regulation of vulval development, locomotion, positive regulation of growth rate, locomotion, positive regulation of locomotion, hermaphrodite genitalia development, reproduction, body morphogenesis, hermaphrodite genitalia develo…
FBgn0038118	timeout	DNA damage checkpoint, entrainment of circadian clock	WBGene00006571	tim-1	regulation of sister chromatid cohesion, regulation of sister chromatid cohesion, mitotic sister chromatid cohesion, mitotic sister chromatid cohesion, meiotic sister chromatid cohesion, embryo development ending in birth or egg hatching
FBgn0030969	CG7288	ubiquitin-dependent protein catabolic process, nuclear mRNA splicing, via spliceosome	WBGene00017280	usp-39	ubiquitin-dependent protein catabolic process, embryo development ending in birth or egg hatching, embryo development ending in birth or egg hatching, reproduction, hermaphrodite genitalia development, receptor-mediated endocytosis, morphogenesis of an epithelium, locomotion, reproduction, hermaphrodite genitalia development, embryo development ending in birth or egg hatching, growth, nematode la…
FBgn0038609	Nup43	mitosis	WBGene00007493	npp-23
FBgn0035489			WBGene00010420	H28O16.2
FBgn0035998	CG3437		WBGene00006466	tag-115
FBgn0025864	Crag	asymmetric protein localization, basement membrane assembly, basal protein localization	WBGene00018681	F52C12.4	negative regulation of locomotion
FBgn0019949	Cdk9	transcription elongation from RNA polymerase II promoter, response to heat, transcription, DNA-dependent, protein phosphorylation, cell adhesion, regulation of cell shape, cell cycle, protein phosphorylation, neurogenesis	WBGene00000410	cdk-9	protein phosphorylation, protein phosphorylation, embryo development ending in birth or egg hatching, embryo development ending in birth or egg hatching, growth, nematode larval development, locomotion, positive regulation of growth rate, embryo development ending in birth or egg hatching, locomotion, embryo development ending in birth or egg hatching, embryo development ending in birth or egg ha…
FBgn0036850	Gem2	spliceosome assembly	WBGene00004886	smi-1	spliceosome assembly, nuclear mRNA splicing, via spliceosome, embryo development ending in birth or egg hatching
FBgn0034360	CG10927		WBGene00012927	Y47D3A.14
FBgn0037958	CG6962		WBGene00011037	R05D11.9	embryo development ending in birth or egg hatching
FBgn0028919	CG16865	nuclear mRNA splicing, via spliceosome	WBGene00013434	Y66D12A.8
FBgn0033844	bbc	phospholipid biosynthetic process	WBGene00013024	Y49A3A.1	phospholipid biosynthetic process, negative regulation of multicellular organism growth, embryo development ending in birth or egg hatching, lipid storage, lipid storage, embryo development ending in birth or egg hatching
FBgn0010590	Prosbeta1	proteasomal ubiquitin-dependent protein catabolic process, proteolysis involved in cellular protein catabolic process, response to DNA damage stimulus	WBGene00003947	pbs-1	proteolysis involved in cellular protein catabolic process, proteolysis involved in cellular protein catabolic process, reproduction, embryo development ending in birth or egg hatching, embryo development ending in birth or egg hatching, growth, nematode larval development, locomotion, embryo development ending in birth or egg hatching, apoptosis, reproduction
FBgn0033380	Phax	nervous system development, snRNA export from nucleus	WBGene00022192	Y71H2B.2	embryo development ending in birth or egg hatching
FBgn0020370	TppII	proteolysis, protein homooligomerization	WBGene00017686	tpp-2	proteolysis, lipid storage
FBgn0000996	dup	chorion-containing eggshell formation, DNA replication checkpoint, DNA replication, DNA-dependent DNA replication, eggshell chorion gene amplification, DNA replication, centrosome duplication, mitotic sister chromatid separation, cytokinesis, antimicrobial humoral response, DNA endoreduplication	WBGene00000413	cdt-1	embryo development ending in birth or egg hatching, embryo development, gastrulation with mouth forming first, embryo development ending in birth or egg hatching, embryo development ending in birth or egg hatching, reproduction, hermaphrodite genitalia development, embryo development ending in birth or egg hatching, body morphogenesis, locomotion, growth, reproduction, hermaphrodite genitalia dev…
FBgn0002441	l(3)mbt	regulation of preblastoderm mitotic cell cycle, syncytial nuclear migration, negative regulation of transcription from RNA polymerase II promoter, neuroblast proliferation, dendrite morphogenesis, muscle organ development, negative regulation of gene expression, negative regulation of cell proliferation	WBGene00021661	mbtr-1	regulation of transcription, DNA-dependent
FBgn0031310	CG4764		WBGene00014234	vps-29
FBgn0032698	CG10336	response to DNA damage stimulus, replication fork protection, cell cycle	WBGene00017738	F23C8.9	response to DNA damage stimulus, cell cycle, replication fork protection
FBgn0022213	Cas	apoptosis, protein import into nucleus, protein export from nucleus, protein export from nucleus, phagocytosis, engulfment, positive regulation of NFAT protein import into nucleus, neurogenesis	WBGene00002079	xpo-2	intracellular protein transport, intracellular protein transport, embryo development ending in birth or egg hatching, embryo development ending in birth or egg hatching, hermaphrodite genitalia development, embryo development ending in birth or egg hatching, locomotion, reproduction, embryo development ending in birth or egg hatching, positive regulation of growth rate, embryo development ending …
FBgn0030790	CG4768		WBGene00016741	C48B6.3
FBgn0031782	WDR79		WBGene00013669	Y105E8A.8
FBgn0031287	CG4291	nuclear mRNA splicing, via spliceosome, nuclear mRNA splicing, via spliceosome, nuclear mRNA splicing, via spliceosome	WBGene00010159	F56G4.4	positive regulation of multicellular organism growth, reproduction, locomotion, reproduction, hermaphrodite genitalia development, growth, nematode larval development, locomotion, locomotion, reproduction, hermaphrodite genitalia development
FBgn0039790	CG2246	nucleotide biosynthetic process	WBGene00012258	W04G3.5	nucleotide biosynthetic process
FBgn0002183	dre4	DNA unwinding involved in replication, regulation of chromatin assembly or disassembly, positive regulation of transcription elongation from RNA polymerase II promoter, neurogenesis	WBGene00018849	F55A3.3	cellular process, embryo development ending in birth or egg hatching, embryo development, gastrulation with mouth forming first, embryo development ending in birth or egg hatching, embryo development ending in birth or egg hatching, embryo development ending in birth or egg hatching, embryo development ending in birth or egg hatching, embryo development ending in birth or egg hatching, embryo dev…
FBgn0024921	Trn	protein import into nucleus, phagocytosis, engulfment, neurogenesis	WBGene00002076	imb-2	intracellular protein transport, positive regulation of growth rate, embryo development ending in birth or egg hatching, nematode larval development, body morphogenesis, positive regulation of growth rate, embryo development ending in birth or egg hatching, locomotion, embryo development ending in birth or egg hatching, growth, nematode larval development, reproduction, embryo development ending …
FBgn0003139	PpV	protein dephosphorylation, G1/S transition of mitotic cell cycle, protein dephosphorylation, mitotic cell cycle	WBGene00007922	pph-6	mitosis, establishment of mitotic spindle localization, first cell cycle pseudocleavage, cortical actin cytoskeleton organization
FBgn0033698	CG8858	biological_process	WBGene00008422	D2045.2	mitosis
FBgn0020756			WBGene00009368	F33H2.5	DNA replication, DNA replication, DNA replication, nucleobase-containing compound metabolic process, embryo development ending in birth or egg hatching, nucleus organization, morphogenesis of an epithelium, embryo development ending in birth or egg hatching, locomotion, hermaphrodite genitalia development, reproduction, embryo development ending in birth or egg hatching, embryo development ending…
FBgn0035106	rno	regulation of transcription, DNA-dependent, negative regulation of epidermal growth factor receptor signaling pathway, negative regulation of epidermal growth factor receptor signaling pathway, compound eye photoreceptor development	WBGene00021810	phf-15	negative regulation of vulval development, negative regulation of vulval development, negative regulation of vulval development, nematode larval development
FBgn0034646	Rae1	regulation of G1/S transition of mitotic cell cycle, mRNA export from nucleus, centrosome organization, regulation of cell cycle, negative regulation of synaptic growth at neuromuscular junction, regulation of autophagy	WBGene00003803	rae-1	negative regulation of locomotion, hermaphrodite genitalia development, reproduction, positive regulation of growth rate, morphogenesis of an epithelium, locomotion, hermaphrodite genitalia development, reproduction, positive regulation of growth rate, morphogenesis of an epithelium, hermaphrodite genitalia development, reproduction, hermaphrodite genitalia development, embryo development ending …
FBgn0050290	Ppcdc	coenzyme A biosynthetic process	WBGene00009138	F25H9.6	reproduction, positive regulation of growth rate, reproduction, positive regulation of growth rate, reproduction, growth, nematode larval development, receptor-mediated endocytosis
FBgn0005198	gig	oogenesis, regulation of cell cycle, regulation of cell cycle, negative regulation of cell growth, negative regulation of cell growth, negative regulation of cell proliferation, negative regulation of insulin receptor signaling pathway, negative regulation of cell size, negative regulation of organ growth, negative regulation of cell growth, negative regulation of cell proliferation, response to …	WBGene00021209	Y18H1A.3	regulation of small GTPase mediated signal transduction
FBgn0039466	CG5521	regulation of small GTPase mediated signal transduction, positive regulation of GTPase activity	WBGene00021209	Y18H1A.3	regulation of small GTPase mediated signal transduction
FBgn0031078	CG11943	nuclear pore organization, SMAD protein import into nucleus, centrosome organization, neurogenesis	WBGene00003789	npp-3	morphogenesis of an epithelium, embryo development ending in birth or egg hatching, locomotion, embryo development ending in birth or egg hatching, determination of adult lifespan, determination of adult lifespan, determination of adult lifespan, embryo development ending in birth or egg hatching, growth, nematode larval development, reproduction, nucleus organization, establishment of mitotic sp…
FBgn0036574	CG16838	neurogenesis	WBGene00013156	Y53F4B.9
FBgn0029999	CG1575		WBGene00012977	Y48A6C.4	growth, nematode larval development, positive regulation of growth rate, growth, nematode larval development, receptor-mediated endocytosis
FBgn0010173	RpA-70	DNA-dependent DNA replication, DNA-dependent DNA replication, mitotic spindle organization, neuron projection morphogenesis, mitotic cell cycle G2/M transition DNA damage checkpoint	WBGene00017546	rpa-1	DNA replication, embryo development ending in birth or egg hatching, embryo development ending in birth or egg hatching, embryo development ending in birth or egg hatching, embryo development ending in birth or egg hatching, embryo development ending in birth or egg hatching, receptor-mediated endocytosis, positive regulation of helicase activity, positive regulation of helicase activity
FBgn0037549	CG7878		WBGene00013214	Y54G11A.3
FBgn0029979	CG10777		WBGene00010260	F58E10.3	embryo development ending in birth or egg hatching, positive regulation of growth rate, growth, nematode larval development
FBgn0012066			WBGene00008645	F10C2.4	DNA replication, DNA replication, DNA replication, nucleobase-containing compound metabolic process, embryo development ending in birth or egg hatching, cell division, cytokinesis, embryo development ending in birth or egg hatching, embryo development ending in birth or egg hatching, embryo development ending in birth or egg hatching, hatching, receptor-mediated endocytosis, embryo development en…
FBgn0031452	Cwc25	mitotic spindle organization	WBGene00003391	mog-3	positive regulation of embryonic development, embryo development ending in birth or egg hatching, embryo development ending in birth or egg hatching, body morphogenesis, feminization of hermaphroditic germ-line, meiotic prophase I
FBgn0051759	CG31759		WBGene00011268	R17.2
FBgn0039120	Nup98-96	phagocytosis, engulfment, SMAD protein import into nucleus, germ-line stem cell maintenance	WBGene00003796	npp-10	transport, embryo development ending in birth or egg hatching, embryo development ending in birth or egg hatching, embryo development ending in birth or egg hatching, embryo development ending in birth or egg hatching, reproduction, embryo development ending in birth or egg hatching, embryo development ending in birth or egg hatching, embryo development ending in birth or egg hatching, embryo dev…
FBgn0015019	Cctgamma	protein folding, protein folding, protein folding, mitotic spindle organization, trachea morphogenesis, terminal branching, open tracheal system	WBGene00018782	cct-3	cellular protein metabolic process, protein folding, embryo development ending in birth or egg hatching, reproduction, embryo development ending in birth or egg hatching, growth, nematode larval development, embryo development ending in birth or egg hatching, microtubule polymerization
FBgn0250746	Prosbeta7	proteolysis, ubiquitin-dependent protein catabolic process, proteasomal ubiquitin-dependent protein catabolic process, proteolysis involved in cellular protein catabolic process, cellular process, mitotic spindle elongation, cell proliferation, mitotic spindle organization, centrosome organization, response to DNA damage stimulus, neurogenesis	WBGene00003953	pbs-7	proteolysis involved in cellular protein catabolic process, embryo development ending in birth or egg hatching, locomotion, embryo development ending in birth or egg hatching, reproduction, embryo development ending in birth or egg hatching, growth, nematode larval development, locomotion, reproduction, embryo development ending in birth or egg hatching, growth, nematode larval development, locom…
FBgn0035945	CG5026	dephosphorylation	WBGene00003479	mtm-9	dephosphorylation, endocytosis, endocytosis, regulation of cell migration
FBgn0046692	Stlk	protein phosphorylation, protein phosphorylation	WBGene00013132	strd-1	protein phosphorylation, embryo development ending in birth or egg hatching, maintenance of dauer, establishment or maintenance of cell polarity, synapse organization, protein localization to synapse, positive regulation of peptidyl-threonine phosphorylation, asymmetric neuroblast division, asymmetric neuroblast division, asymmetric neuroblast division
FBgn0030638	CG11655	sodium ion transport	WBGene00044650	Y71G10AR.4	sodium ion transport
FBgn0030638	CG11655	sodium ion transport	WBGene00022135	Y71G10AR.1	sodium ion transport
FBgn0036819	dysb	regulation of synaptic plasticity, long-term memory, negative regulation of dopamine metabolic process, mating behavior, sex discrimination, negative regulation of dopamine metabolic process, positive regulation of synaptic transmission, glutamatergic, adult locomotory behavior, short-term memory	WBGene00013697	dsbn-1
FBgn0020369	Pros45	ubiquitin-dependent protein catabolic process, proteolysis, proteolysis, proteolysis, proteolysis, proteasomal ubiquitin-dependent protein catabolic process, protein catabolic process, response to DNA damage stimulus	WBGene00018991	F56F11.4	protein catabolic process, embryo development ending in birth or egg hatching, nematode larval development, growth, nematode larval development, reproduction, hermaphrodite genitalia development, embryo development ending in birth or egg hatching, growth, nematode larval development, embryo development ending in birth or egg hatching, growth, nematode larval development, growth, nematode larval d…
FBgn0033526	Caf1-105	chromatin assembly or disassembly, nucleosome assembly	WBGene00022141	chaf-2	embryo development ending in birth or egg hatching, reproduction, embryo development ending in birth or egg hatching
FBgn0020255	ran	cell cycle, regulation of cell shape, cell adhesion, actin filament organization, GTP catabolic process, nucleocytoplasmic transport, intracellular protein transport, small GTPase mediated signal transduction, neuron projection morphogenesis, meiotic spindle organization	WBGene00004302	ran-1	small GTPase mediated signal transduction, GTP catabolic process, intracellular protein transport, nucleocytoplasmic transport, signal transduction, embryo development ending in birth or egg hatching, embryo development ending in birth or egg hatching, embryo development ending in birth or egg hatching, reproduction, nematode larval development, locomotion, reproduction, embryo development ending…
FBgn0034447	CG7744		WBGene00011994	T24F1.2	reproduction
FBgn0023520	CG3857		WBGene00013188	smg-9
FBgn0027780	U26	fatty acid metabolic process	WBGene00012356	W09D6.1	metabolic process
FBgn0030996	CG14194		WBGene00013789	Y116A8C.9
FBgn0002878	mus101	mitosis, oogenesis, mitotic cell cycle G2/M transition DNA damage checkpoint, mitotic cell cycle G2/M transition DNA damage checkpoint, mitotic cell cycle DNA replication checkpoint	WBGene00009507	mus-101	embryo development ending in birth or egg hatching, morphogenesis of an epithelium, locomotion, reproduction, locomotion, embryo development ending in birth or egg hatching, positive regulation of DNA replication, positive regulation of cell proliferation, response to DNA damage stimulus, embryo development ending in birth or egg hatching, embryo development ending in birth or egg hatching
FBgn0040394	CG16903	regulation of transcription, DNA-dependent, RNA processing, regulation of cyclin-dependent protein kinase activity, neurogenesis	WBGene00000876	cyl-1	regulation of cyclin-dependent protein kinase activity, regulation of transcription, DNA-dependent, RNA processing, RNA processing, positive regulation of growth rate, embryo development ending in birth or egg hatching, nematode larval development, determination of adult lifespan, embryo development ending in birth or egg hatching, growth, nematode larval development, nematode larval development,…
FBgn0015615	Cap	sister chromatid cohesion, neurogenesis, lateral inhibition, imaginal disc-derived wing morphogenesis, establishment of imaginal disc-derived wing hair orientation	WBGene00004873	smc-3	chromosome organization, embryo development ending in birth or egg hatching, embryo development ending in birth or egg hatching, positive regulation of growth rate, morphogenesis of an epithelium, determination of adult lifespan, positive regulation of growth rate, locomotion, hermaphrodite genitalia development, reproduction, collagen and cuticulin-based cuticle development, reproduction, hermap…
FBgn0004913	Gnf1	DNA replication, DNA replication, DNA replication, DNA replication, neurogenesis, lateral inhibition	WBGene00004337	rfc-1	DNA replication, DNA replication, DNA replication, embryo development ending in birth or egg hatching, positive regulation of growth rate, embryo development ending in birth or egg hatching, growth, nematode larval development, embryo development ending in birth or egg hatching, response to DNA damage stimulus, receptor-mediated endocytosis, embryo development ending in birth or egg hatching, rep…
FBgn0038569	CG7218	biological_process	WBGene00009172	F26F2.7	embryo development ending in birth or egg hatching
FBgn0035021	CG4622	biological_process	WBGene00021332	Y34D9A.7
FBgn0004643	mit(1)15	chromosome segregation, regulation of meiosis, meiotic anaphase I, mitotic cell cycle spindle assembly checkpoint, mitotic sister chromatid segregation, mitotic cell cycle spindle assembly checkpoint, cell cycle, neurogenesis	WBGene00017643	czw-1	mitosis, reproduction, positive regulation of growth rate, embryo development ending in birth or egg hatching, locomotion, locomotion, reproduction, embryo development ending in birth or egg hatching, nematode larval development, embryo development ending in birth or egg hatching, growth, nematode larval development, locomotion, reproduction, receptor-mediated endocytosis, secretion by cell, repr…
FBgn0031060	CG14231		WBGene00007237	C01G10.10
FBgn0028686	Rpt3	proteolysis, proteolysis, proteolysis, proteasomal ubiquitin-dependent protein catabolic process, protein catabolic process, response to DNA damage stimulus	WBGene00004503	rpt-3	protein catabolic process, embryo development ending in birth or egg hatching, reproduction, embryo development ending in birth or egg hatching, embryo development ending in birth or egg hatching, nematode larval development, embryo development ending in birth or egg hatching, nematode larval development, nematode larval development, determination of adult lifespan, determination of adult lifespa…
[truncated: 250 more rows]

## Sheet: WEE_50-90-FEmbryo0-2h
fly gene ID	fly gene name	fly GO terms	worm gene ID	worm gene name	worm GO terms
[truncated: 356 more rows]

## Sheet: WEE_50-120-FEmbryo2-4h
fly gene ID	fly gene name	fly GO terms	worm gene ID	worm gene name	worm GO terms
[truncated: 254 more rows]

## Sheet: WEE_50-150-FEmbryo2-4h
fly gene ID	fly gene name	fly GO terms	worm gene ID	worm gene name	worm GO terms
[truncated: 391 more rows]

## Sheet: WEE_50-180-FEmbryo10-12h
fly gene ID	fly gene name	fly GO terms	worm gene ID	worm gene name	worm GO terms
[truncated: 109 more rows]

## Sheet: WEE_50-210-FEmbryo10-12h
fly gene ID	fly gene name	fly GO terms	worm gene ID	worm gene name	worm GO terms
[truncated: 100 more rows]

## Sheet: wormEE_50-240-flyEmbryo10-12h
fly gene ID	fly gene name	fly GO terms	worm gene ID	worm gene name	worm GO terms
[truncated: 161 more rows]

## Sheet: wormEE_50-240-flyL1
fly gene ID	fly gene name	fly GO terms	worm gene ID	worm gene name	worm GO terms
FBgn0036488	CG6878		WBGene00008860	rmo-1
[truncated: 82 more rows]

[truncated: 36 more sheets: WEE_50-300-FEmbryo6-8h, WEE_50-330-FEmbryo6-8h, WEE_50-360-FEmbryo4-6h, WEE_50-390-FEmbryo6-8h, WEE_50-420-FEmbryo6-8h, WEE_50-450-FEmbryo12-14h, wormEE_50-480-flyEmbryo12-14h, wormEE_50-480-flyPrepupae+2d, wormEE_50-510-flyEmbryo12-14h, wormEE_50-510-flyPrepupae+2d, wormEE_50-540-flyEmbryo14-16h, wormEE_50-540-flyPrepupae+2d, wormEE_50-570-flyEmbryo12-14h, wormEE_50-570-flyPrepupae+2d, wormEE_50-600-flyEmbryo18-20h, wormEE_50-600-flyPrepupae+2d, wormEE_50-630-flyEmbryo18-20h, wormEE_50-630-flyPrepupae+2d, wormEE_50-660-flyEmbryo18-20h, wormEE_50-660-flyPrepupae+2d …]
