# Supplementary material for: Comparison of D. melanogaster and C. elegans developmental stages, tissues, and cells by modENCODE RNA-seq data
Source: HighWire-hosted journal article supplement (doi:10.1101/gr.170100.113), 2014-07-01
Supplement: Supplemental_Files.zip [file TableS7B FlyGOclustersInStagePairs.xls]

## Sheet: WEE_50-0-FEmbryo0-2h
sample name: WEE_50-0-FEmbryo0-2h
number of associated genes in the sample: 463
Cluster 1: DNA repair
observed gene count: 32
expected gene count: 8.63837570879824
uncorrected p-value: 1.9848935482558e-11
GO ID	term	observed gene count	expected gene count	uncorrected p-value
GO:0006974	response to DNA damage stimulus	20	5.84361	5.49817e-07
GO:0006281	DNA repair	11	3.13353	0.000159983
GO:0006259	DNA metabolic process	1	0.16938	0.162222
Cluster 2: proteolysis
observed gene count: 39
expected gene count: 17.0226815438083
uncorrected p-value: 5.05378047566355e-07
GO ID	term	observed gene count	expected gene count	uncorrected p-value
GO:0006511	ubiquitin-dependent protein catabolic process	20	4.57326	5.10783e-09
GO:0051603	proteolysis involved in cellular protein catabolic process	7	0.59283	2.9971e-08
GO:0006508	proteolysis	27	13.0423	0.000186748
GO:0030163	protein catabolic process	6	1.52442	0.00274297
Cluster 3: DNA replication
observed gene count: 15
expected gene count: 3.47228827510518
uncorrected p-value: 5.31561140417918e-07
GO ID	term	observed gene count	expected gene count	uncorrected p-value
GO:0006260	DNA replication	13	2.79477	1.15362e-06
GO:0006261	DNA-dependent DNA replication	5	1.01628	0.00204388
GO:0006259	DNA metabolic process	1	0.16938	0.162222
Cluster 4: mitosis
observed gene count: 51
expected gene count: 26.5079568319005
uncorrected p-value: 2.48960723993835e-06
GO ID	term	observed gene count	expected gene count	uncorrected p-value
GO:0007049	cell cycle	11	2.5407	1.7659e-05
GO:0000278	mitotic cell cycle	7	1.86318	0.00165349
GO:0008283	cell proliferation	11	4.06512	0.00179957
GO:0007052	mitotic spindle organization	21	10.925	0.00249978
GO:0007067	mitosis	11	4.74264	0.00639971
GO:0000087	M phase of mitotic cell cycle	2	0.25407	0.020267
GO:0000022	mitotic spindle elongation	11	5.58954	0.0214793
GO:0000226	microtubule cytoskeleton organization	4	1.6938	0.083082
GO:0000280	nuclear division	1	0.25407	0.233199
GO:0007017	microtubule-based process	3	2.28663	0.403839
GO:0007051	spindle organization	1	0.8469	0.587569
GO:0007010	cytoskeleton organization	2	2.20194	0.659499
Cluster 5: chromosome condensation
observed gene count: 8
expected gene count: 1.5244192427291
uncorrected p-value: 5.08857281779801e-05
GO ID	term	observed gene count	expected gene count	uncorrected p-value
GO:0006270	DNA replication initiation	6	0.76221	2.40717e-05
GO:0030261	chromosome condensation	6	1.10097	0.000365888
Cluster 6: oogenesis
observed gene count: 29
expected gene count: 16.0064020486556
uncorrected p-value: 0.00109120173128927
GO ID	term	observed gene count	expected gene count	uncorrected p-value
GO:0048477	oogenesis	19	8.80776	0.000989266
GO:0007281	germ cell development	5	1.18566	0.00448027
GO:0007307	eggshell chorion gene amplification	4	0.93159	0.0103531
GO:0046843	dorsal appendage formation	4	1.18566	0.0256214
GO:0006277	DNA amplification	1	0.16938	0.162222
GO:0006417	regulation of translation	1	0.42345	0.357656
GO:0030707	ovarian follicle cell development	2	1.94787	0.591881
GO:0032504	multicellular organism reproduction	1	3.3876	0.97136
Cluster 7: female meiosis
observed gene count: 9
expected gene count: 2.87945856959941
uncorrected p-value: 0.00159246292901029
GO ID	term	observed gene count	expected gene count	uncorrected p-value
GO:0007056	spindle assembly involved in female meiosis	2	0.33876	0.0382711
GO:0000212	meiotic spindle organization	2	0.33876	0.0382711
GO:0007143	female meiosis	3	0.93159	0.0596304
GO:0051225	spindle assembly	3	1.18566	0.109083
Cluster 8: G2/M transition of mitotic cell cycle
observed gene count: 3
expected gene count: 0.338759831717578
uncorrected p-value: 0.00226281711360548
GO ID	term	observed gene count	expected gene count	uncorrected p-value
GO:0000086	G2/M transition of mitotic cell cycle	3	0.33876	0.00226282
Cluster 9: nuclear export
observed gene count: 8
expected gene count: 2.79476861167002
uncorrected p-value: 0.00518949122838855
GO ID	term	observed gene count	expected gene count	uncorrected p-value
GO:0006406	mRNA export from nucleus	6	1.18566	0.000594866
GO:0006913	nucleocytoplasmic transport	2	0.59283	0.113045
GO:0051168	nuclear export	1	0.33876	0.298175
GO:0051028	mRNA transport	1	0.42345	0.357656
Cluster 10: cell cycle checkpoint
observed gene count: 4
expected gene count: 0.846899579293945
uncorrected p-value: 0.00705402465093127
GO ID	term	observed gene count	expected gene count	uncorrected p-value
GO:0000077	DNA damage checkpoint	4	0.76221	0.00453258
GO:0000075	cell cycle checkpoint	2	0.33876	0.0382711
Cluster 11: chromosome segregation
observed gene count: 7
expected gene count: 2.45600877995244
uncorrected p-value: 0.00900792148683697
GO ID	term	observed gene count	expected gene count	uncorrected p-value
GO:0000070	mitotic sister chromatid segregation	4	0.93159	0.0103531
GO:0007059	chromosome segregation	3	1.35504	0.148373
GO:0000819	sister chromatid segregation	1	0.33876	0.298175
Cluster 12: meiosis
observed gene count: 8
expected gene count: 3.21821840131699
uncorrected p-value: 0.0125789733493142
GO ID	term	observed gene count	expected gene count	uncorrected p-value
GO:0007143	female meiosis	3	0.93159	0.0596304
GO:0007059	chromosome segregation	3	1.35504	0.148373
GO:0007127	meiosis I	1	0.16938	0.162222
GO:0007126	meiosis	2	1.10097	0.302788
Cluster 13: meiosis I
observed gene count: 5
expected gene count: 1.6091092006585
uncorrected p-value: 0.0182782448921234
GO ID	term	observed gene count	expected gene count	uncorrected p-value
GO:0007131	reciprocal meiotic recombination	4	0.76221	0.00453258
GO:0007127	meiosis I	1	0.16938	0.162222
GO:0006310	DNA recombination	1	0.8469	0.587569
Cluster 14: centrosome separation
observed gene count: 7
expected gene count: 3.0488384854582
uncorrected p-value: 0.0288478322765033
GO ID	term	observed gene count	expected gene count	uncorrected p-value
GO:0051297	centrosome organization	5	2.45601	0.0934147
GO:0051299	centrosome separation	2	0.59283	0.113045
Cluster 15: cell motion
observed gene count: 4
expected gene count: 1.27034936894092
uncorrected p-value: 0.0326620122181721
GO ID	term	observed gene count	expected gene count	uncorrected p-value
GO:0006928	cell motion	1	0.08469	0.08469
GO:0016477	cell migration	2	0.76221	0.173459
GO:0007297	ovarian follicle cell migration	1	0.42345	0.357656
Cluster 16: cellularization
observed gene count: 5
expected gene count: 1.94786903237607
uncorrected p-value: 0.0400041991050695
GO ID	term	observed gene count	expected gene count	uncorrected p-value
GO:0007279	pole cell formation	3	0.67752	0.0244775
GO:0007277	pole cell development	1	0.33876	0.298175
GO:0007349	cellularization	2	1.27035	0.3669
Cluster 17: transcription, DNA-dependent
observed gene count: 13
expected gene count: 7.96085604536309
uncorrected p-value: 0.052073432664963
GO ID	term	observed gene count	expected gene count	uncorrected p-value
GO:0006367	transcription initiation from RNA polymerase II promoter	11	4.06512	0.00179957
GO:0006366	transcription from RNA polymerase II promoter	8	2.96415	0.00757327
GO:0006351	transcription, DNA-dependent	2	2.45601	0.717842
Cluster 18: segmentation
observed gene count: 14
expected gene count: 8.80775562465703
uncorrected p-value: 0.0543977188733857
GO ID	term	observed gene count	expected gene count	uncorrected p-value
GO:0007281	germ cell development	5	1.18566	0.00448027
GO:0008298	intracellular mRNA localization	3	1.01628	0.0746713
GO:0007309	oocyte axis specification	2	0.76221	0.173459
GO:0009948	anterior/posterior axis specification	1	0.25407	0.233199
GO:0035282	segmentation	1	0.33876	0.298175
GO:0007314	oocyte anterior/posterior axis specification	2	1.18566	0.335072
GO:0007315	pole plasm assembly	1	0.59283	0.461949
GO:0008595	determination of anterior/posterior axis, embryo	2	1.60911	0.486988
GO:0007350	blastoderm segmentation	1	1.10097	0.683909
Cluster 19: protein deubiquitination
observed gene count: 2
expected gene count: 0.508139747576367
uncorrected p-value: 0.0854067441192047
GO ID	term	observed gene count	expected gene count	uncorrected p-value
GO:0016579	protein deubiquitination	2	0.50814	0.0854067
Cluster 20: regulation of protein localization
observed gene count: 4
expected gene count: 1.77848911651729
uncorrected p-value: 0.0960877782397538
GO ID	term	observed gene count	expected gene count	uncorrected p-value
GO:0051533	positive regulation of NFAT protein import into nucleus	3	0.76221	0.03445
GO:0032880	regulation of protein localization	1	0.25407	0.233199
Cluster 21: stem cell division
observed gene count: 4
expected gene count: 1.86317907444668
uncorrected p-value: 0.109982358656005
GO ID	term	observed gene count	expected gene count	uncorrected p-value
GO:0017145	stem cell division	2	0.25407	0.020267
GO:0042078	germ-line stem cell division	2	0.76221	0.173459
GO:0008356	asymmetric cell division	1	1.01628	0.654592
Cluster 22: regulation of nuclear mRNA splicing, via spliceosome
observed gene count: 2
expected gene count: 0.592829705505762
uncorrected p-value: 0.113045464748512
GO ID	term	observed gene count	expected gene count	uncorrected p-value
GO:0048024	regulation of nuclear mRNA splicing, via spliceosome	2	0.33876	0.0382711
Cluster 23: axonogenesis
observed gene count: 23
expected gene count: 18.2083409548198
uncorrected p-value: 0.142361877443848
GO ID	term	observed gene count	expected gene count	uncorrected p-value
GO:0048813	dendrite morphogenesis	10	5.75892	0.0585411
GO:0007517	muscle organ development	5	2.71008	0.129217
GO:0000902	cell morphogenesis	4	2.87946	0.324263
GO:0007409	axonogenesis	3	2.5407	0.472985
GO:0048666	neuron development	2	1.60911	0.486988
GO:0048812	neuron projection morphogenesis	6	6.52113	0.645342
Cluster 24: mRNA catabolic process
observed gene count: 2
expected gene count: 0.762209621364551
uncorrected p-value: 0.173458989837707
GO ID	term	observed gene count	expected gene count	uncorrected p-value
GO:0006402	mRNA catabolic process	1	0.16938	0.162222
GO:0000956	nuclear-transcribed mRNA catabolic process	1	0.25407	0.233199
GO:0000184	nuclear-transcribed mRNA catabolic process, nonsense-mediated decay	1	0.42345	0.357656
Cluster 25: gene silencing
observed gene count: 2
expected gene count: 0.762209621364551
uncorrected p-value: 0.173458989837707
GO ID	term	observed gene count	expected gene count	uncorrected p-value
GO:0016441	posttranscriptional gene silencing	1	0.08469	0.08469
GO:0016458	gene silencing	1	0.33876	0.298175
Cluster 26: nucleotide biosynthetic process
observed gene count: 1
expected gene count: 0.254069873788184
uncorrected p-value: 0.233199082653939
GO ID	term	observed gene count	expected gene count	uncorrected p-value
GO:0009165	nucleotide biosynthetic process	1	0.25407	0.233199
Cluster 27: transmembrane receptor protein tyrosine kinase signaling pathway
observed gene count: 2
expected gene count: 0.93158953722334
uncorrected p-value: 0.237641620777151
GO ID	term	observed gene count	expected gene count	uncorrected p-value
GO:0007169	transmembrane receptor protein tyrosine kinase signaling pathway	2	0.59283	0.113045
Cluster 28: regulation of mitosis
observed gene count: 8
expected gene count: 5.92829705505762
uncorrected p-value: 0.238486487323384
GO ID	term	observed gene count	expected gene count	uncorrected p-value
GO:0030071	regulation of mitotic metaphase/anaphase transition	2	0.33876	0.0382711
GO:0007088	regulation of mitosis	2	0.8469	0.205276
GO:0007346	regulation of mitotic cell cycle	2	1.18566	0.335072
GO:0051726	regulation of cell cycle	3	3.64167	0.718253
Cluster 29: histone acetylation
observed gene count: 6
expected gene count: 4.23449789646973
uncorrected p-value: 0.24603690149899
GO ID	term	observed gene count	expected gene count	uncorrected p-value
GO:0016577	histone demethylation	2	0.25407	0.020267
GO:0016573	histone acetylation	2	0.59283	0.113045
GO:0006325	chromatin organization	2	1.01628	0.270236
Cluster 30: wing disc development
observed gene count: 10
expected gene count: 8.04554600329248
uncorrected p-value: 0.282390770575621
GO ID	term	observed gene count	expected gene count	uncorrected p-value
GO:0048190	wing disc dorsal/ventral pattern formation	4	1.52442	0.0599084
GO:0007444	imaginal disc development	2	1.10097	0.302788
GO:0035222	wing disc pattern formation	1	0.42345	0.357656
GO:0035220	wing disc development	3	3.55698	0.703032
Cluster 31: MAPKKK cascade
observed gene count: 3
expected gene count: 1.94786903237607
uncorrected p-value: 0.308315195067471
GO ID	term	observed gene count	expected gene count	uncorrected p-value
GO:0007243	protein kinase cascade	1	0.08469	0.08469
GO:0042325	regulation of phosphorylation	1	0.25407	0.233199
GO:0000165	MAPKKK cascade	1	0.59283	0.461949
Cluster 32: nucleus localization
observed gene count: 1
expected gene count: 0.423449789646973
uncorrected p-value: 0.357656118860627
GO ID	term	observed gene count	expected gene count	uncorrected p-value
GO:0051647	nucleus localization	1	0.16938	0.162222
Cluster 33: protein transport
observed gene count: 15
expected gene count: 13.7197731845619
uncorrected p-value: 0.397862873889872
GO ID	term	observed gene count	expected gene count	uncorrected p-value
GO:0006606	protein import into nucleus	5	1.35504	0.00848258
GO:0034613	cellular protein localization	1	0.08469	0.08469
GO:0008104	protein localization	4	2.45601	0.227321
GO:0006886	intracellular protein transport	4	5.25078	0.782539
GO:0015031	protein transport	2	4.06512	0.923091
Cluster 34: actin filament organization
observed gene count: 6
expected gene count: 5.08139747576367
uncorrected p-value: 0.398847047773586
GO ID	term	observed gene count	expected gene count	uncorrected p-value
GO:0030029	actin filament-based process	1	0.33876	0.298175
GO:0030036	actin cytoskeleton organization	3	2.28663	0.403839
GO:0007015	actin filament organization	4	3.3876	0.442891
Cluster 35: gene silencing
observed gene count: 24
expected gene count: 22.5275288092189
uncorrected p-value: 0.402709574847929
GO ID	term	observed gene count	expected gene count	uncorrected p-value
GO:0006342	chromatin silencing	4	1.52442	0.0599084
GO:0006357	regulation of transcription from RNA polymerase II promoter	7	5.33547	0.282882
GO:0016458	gene silencing	1	0.33876	0.298175
GO:0045892	negative regulation of transcription, DNA-dependent	3	2.62539	0.495229
GO:0010629	negative regulation of gene expression	2	1.86318	0.567223
GO:0006355	regulation of transcription, DNA-dependent	9	14.0585	0.949886
Cluster 36: apoptosis
observed gene count: 4
expected gene count: 3.21821840131699
uncorrected p-value: 0.403699938282861
GO ID	term	observed gene count	expected gene count	uncorrected p-value
GO:0006919	activation of caspase activity	3	0.50814	0.00993922
GO:0006915	apoptosis	2	1.18566	0.335072
Cluster 37: positive regulation of mitotic cell cycle
observed gene count: 1
expected gene count: 0.592829705505762
uncorrected p-value: 0.461949415318978
GO ID	term	observed gene count	expected gene count	uncorrected p-value
GO:0045931	positive regulation of mitotic cell cycle	1	0.25407	0.233199
Cluster 38: cell adhesion
observed gene count: 8
expected gene count: 7.45271629778672
uncorrected p-value: 0.471799063626443
GO ID	term	observed gene count	expected gene count	uncorrected p-value
GO:0022604	regulation of cell morphogenesis	1	0.08469	0.08469
GO:0008360	regulation of cell shape	6	4.48857	0.290532
GO:0007155	cell adhesion	5	4.91202	0.551991
Cluster 39: cell fate determination
observed gene count: 3
expected gene count: 2.62538869581123
uncorrected p-value: 0.495229407967399
GO ID	term	observed gene count	expected gene count	uncorrected p-value
GO:0001709	cell fate determination	3	1.01628	0.0746713
GO:0008356	asymmetric cell division	1	1.01628	0.654592
Cluster 40: dorsal closure
observed gene count: 9
expected gene count: 8.80775562465703
uncorrected p-value: 0.524556906705546
GO ID	term	observed gene count	expected gene count	uncorrected p-value
GO:0001738	morphogenesis of a polarized epithelium	2	0.76221	0.173459
GO:0009792	embryonic development ending in birth or egg hatching	1	0.33876	0.298175
GO:0001736	establishment of planar polarity	2	1.10097	0.302788
GO:0001700	embryonic development via the syncytial blastoderm	3	2.11725	0.356309
GO:0007164	establishment of tissue polarity	1	0.42345	0.357656
GO:0007391	dorsal closure	3	4.14981	0.797103
Cluster 41: positive regulation of gene expression
observed gene count: 13
expected gene count: 12.872873605268
uncorrected p-value: 0.528450877271893
GO ID	term	observed gene count	expected gene count	uncorrected p-value
GO:0010628	positive regulation of gene expression	2	0.76221	0.173459
GO:0006357	regulation of transcription from RNA polymerase II promoter	7	5.33547	0.282882
GO:0045893	positive regulation of transcription, DNA-dependent	2	2.87946	0.796306
GO:0045944	positive regulation of transcription from RNA polymerase II promoter	5	6.69051	0.811094
Cluster 42: cell growth
observed gene count: 3
expected gene count: 3.21821840131699
uncorrected p-value: 0.635928860252307
GO ID	term	observed gene count	expected gene count	uncorrected p-value
GO:0008361	regulation of cell size	2	0.76221	0.173459
GO:0016049	cell growth	2	0.8469	0.205276
Cluster 43: rRNA processing
observed gene count: 4
expected gene count: 4.40387781232852
uncorrected p-value: 0.653211101707285
GO ID	term	observed gene count	expected gene count	uncorrected p-value
GO:0006364	rRNA processing	3	2.20194	0.380173
GO:0042254	ribosome biogenesis	2	2.28663	0.679952
Cluster 44: mRNA processing
observed gene count: 12
expected gene count: 13.0422535211268
uncorrected p-value: 0.663223432267408
GO ID	term	observed gene count	expected gene count	uncorrected p-value
GO:0000245	spliceosome assembly	2	0.42345	0.0602509
GO:0006397	mRNA processing	1	1.18566	0.710742
GO:0000398	nuclear mRNA splicing, via spliceosome	9	11.5178	0.825916
Cluster 45: phosphorylation
observed gene count: 14
expected gene count: 15.3288823852204
uncorrected p-value: 0.680567920868996
GO ID	term	observed gene count	expected gene count	uncorrected p-value
GO:0016311	dephosphorylation	2	1.27035	0.3669
GO:0006468	protein amino acid phosphorylation	11	12.4494	0.711804
GO:0016310	phosphorylation	1	1.60911	0.814418
Cluster 46: RNA processing
observed gene count: 2
expected gene count: 2.37131882202305
uncorrected p-value: 0.699391536279732
GO ID	term	observed gene count	expected gene count	uncorrected p-value
GO:0006397	mRNA processing	1	1.18566	0.710742
GO:0006396	RNA processing	1	1.18566	0.710742
Cluster 47: GPI anchor biosynthetic process
observed gene count: 3
expected gene count: 3.55697823303457
uncorrected p-value: 0.70303174381064
GO ID	term	observed gene count	expected gene count	uncorrected p-value
GO:0008654	phospholipid biosynthetic process	2	0.93159	0.237642
GO:0006506	GPI anchor biosynthetic process	1	1.18566	0.710742
Cluster 48: determination of adult life span
observed gene count: 6
expected gene count: 7.02926650813975
uncorrected p-value: 0.716347290932081
GO ID	term	observed gene count	expected gene count	uncorrected p-value
GO:0008340	determination of adult life span	6	6.94458	0.70523
Cluster 49: nucleosome assembly
observed gene count: 4
expected gene count: 5.16608743369307
uncorrected p-value: 0.771584096202575
GO ID	term	observed gene count	expected gene count	uncorrected p-value
GO:0065004	protein-DNA complex assembly	1	0.16938	0.162222
GO:0006334	nucleosome assembly	3	4.74264	0.864925
GO:0006333	chromatin assembly or disassembly	2	4.40388	0.942496
Cluster 50: learning or memory
observed gene count: 1
expected gene count: 1.86317907444668
uncorrected p-value: 0.857833120922512
GO ID	term	observed gene count	expected gene count	uncorrected p-value
GO:0007611	learning or memory	1	1.77849	0.844624
Cluster 51: compound eye development
observed gene count: 8
expected gene count: 11.1790744466801
uncorrected p-value: 0.881956220749468
GO ID	term	observed gene count	expected gene count	uncorrected p-value
GO:0001751	compound eye photoreceptor cell differentiation	2	1.01628	0.270236
GO:0007423	sensory organ development	3	2.20194	0.380173
GO:0048749	compound eye development	3	4.74264	0.864925
GO:0001745	compound eye morphogenesis	2	4.06512	0.923091
Cluster 52: membrane organization
observed gene count: 14
expected gene count: 18.8011706603256
uncorrected p-value: 0.908550708381483
GO ID	term	observed gene count	expected gene count	uncorrected p-value
GO:0006911	phagocytosis, engulfment	13	10.5862	0.258379
GO:0016044	membrane organization	1	0.50814	0.412106
Cluster 53: synaptic transmission
observed gene count: 2
expected gene count: 3.89573806475215
uncorrected p-value: 0.911215421342535
GO ID	term	observed gene count	expected gene count	uncorrected p-value
GO:0050807	regulation of synapse organization	1	0.59283	0.461949
GO:0007268	synaptic transmission	1	2.37132	0.916608
Cluster 54: metamorphosis
observed gene count: 2
expected gene count: 3.89573806475215
uncorrected p-value: 0.911215421342535
GO ID	term	observed gene count	expected gene count	uncorrected p-value
GO:0007552	metamorphosis	1	1.01628	0.654592
GO:0007435	salivary gland morphogenesis	1	1.6938	0.83019
Cluster 55: cell growth
observed gene count: 10
expected gene count: 14.820742637644
uncorrected p-value: 0.935858862585184
GO ID	term	observed gene count	expected gene count	uncorrected p-value
GO:0016049	cell growth	2	0.8469	0.205276
GO:0007444	imaginal disc development	2	1.10097	0.302788
GO:0007552	metamorphosis	1	1.01628	0.654592
GO:0035220	wing disc development	3	3.55698	0.703032
GO:0007476	imaginal disc-derived wing morphogenesis	3	7.45272	0.983231
Cluster 56: translation
observed gene count: 1
expected gene count: 14.820742637644
uncorrected p-value: 0.999999855463544
GO ID	term	observed gene count	expected gene count	uncorrected p-value
GO:0006412	translation	1	14.7361	1

## Sheet: WEE_50-30-FEmbryo0-2h
sample name: WEE_50-30-FEmbryo0-2h
number of associated genes in the sample: 559
Cluster 1: DNA repair
observed gene count: 35
expected gene count: 10.4294860069508
uncorrected p-value: 2.79261154745516e-11
GO ID	term	observed gene count	expected gene count	uncorrected p-value
GO:0006974	response to DNA damage stimulus	22	7.05524	6.29534e-07
GO:0006281	DNA repair	13	3.78324	4.07918e-05
GO:0006259	DNA metabolic process	1	0.2045	0.194061
Cluster 2: DNA replication
observed gene count: 21
expected gene count: 4.19224437534297
uncorrected p-value: 4.21271642460672e-11
GO ID	term	observed gene count	expected gene count	uncorrected p-value
GO:0006260	DNA replication	18	3.37425	2.74739e-10
GO:0006261	DNA-dependent DNA replication	6	1.227	0.00059939
GO:0006259	DNA metabolic process	1	0.2045	0.194061
Cluster 3: mitotic anaphase
observed gene count: 27
expected gene count: 8.38448875068593
uncorrected p-value: 1.51551120340914e-08
GO ID	term	observed gene count	expected gene count	uncorrected p-value
GO:0000090	mitotic anaphase	5	0.613499	6.04111e-05
GO:0007094	mitotic cell cycle spindle assembly checkpoint	4	0.511249	0.000497293
GO:0007346	regulation of mitotic cell cycle	6	1.4315	0.00162839
GO:0030071	regulation of mitotic metaphase/anaphase transition	3	0.408999	0.00393075
GO:0007088	regulation of mitosis	4	1.0225	0.0137367
GO:0007093	mitotic cell cycle checkpoint	3	0.613499	0.0167908
GO:0045786	negative regulation of cell cycle	1	0.10225	0.10225
GO:0051726	regulation of cell cycle	7	4.39674	0.144121
GO:0000075	cell cycle checkpoint	1	0.408999	0.350517
Cluster 4: proteolysis
observed gene count: 43
expected gene count: 20.5522224254619
uncorrected p-value: 1.4518169494431e-06
GO ID	term	observed gene count	expected gene count	uncorrected p-value
GO:0006511	ubiquitin-dependent protein catabolic process	22	5.52149	3.67625e-09
GO:0051603	proteolysis involved in cellular protein catabolic process	7	0.715749	1.12961e-07
GO:0006508	proteolysis	29	15.7465	0.000763773
GO:0030163	protein catabolic process	6	1.8405	0.00705104
Cluster 5: mitosis
observed gene count: 56
expected gene count: 32.0042070605451
uncorrected p-value: 1.4490637780165e-05
GO ID	term	observed gene count	expected gene count	uncorrected p-value
GO:0007049	cell cycle	14	3.0675	3.5902e-07
GO:0007052	mitotic spindle organization	25	13.1902	0.00113305
GO:0007067	mitosis	13	5.72599	0.00349728
GO:0008283	cell proliferation	11	4.90799	0.00775166
GO:0000278	mitotic cell cycle	6	2.2495	0.0199185
GO:0000087	M phase of mitotic cell cycle	2	0.30675	0.029187
GO:0000022	mitotic spindle elongation	10	6.74849	0.131998
GO:0000280	nuclear division	1	0.30675	0.276499
GO:0007017	microtubule-based process	4	2.76075	0.295969
GO:0000226	microtubule cytoskeleton organization	3	2.045	0.335889
GO:0007010	cytoskeleton organization	1	2.6585	0.93987
Cluster 6: chromosome condensation
observed gene count: 9
expected gene count: 1.84049753063838
uncorrected p-value: 2.38944955573396e-05
GO ID	term	observed gene count	expected gene count	uncorrected p-value
GO:0006270	DNA replication initiation	7	0.920249	3.3794e-06
GO:0006267	pre-replicative complex assembly	5	0.511249	1.09981e-05
GO:0030261	chromosome condensation	6	1.32925	0.00101764
Cluster 7: mRNA transport
observed gene count: 14
expected gene count: 4.39674410096945
uncorrected p-value: 5.47475707587762e-05
GO ID	term	observed gene count	expected gene count	uncorrected p-value
GO:0006406	mRNA export from nucleus	10	1.4315	7.92564e-08
GO:0006913	nucleocytoplasmic transport	4	0.715749	0.00294098
GO:0051168	nuclear export	1	0.408999	0.350517
GO:0051028	mRNA transport	1	0.511249	0.416975
Cluster 8: transcription initiation
observed gene count: 20
expected gene count: 9.61148710444485
uncorrected p-value: 0.00105795105455572
GO ID	term	observed gene count	expected gene count	uncorrected p-value
GO:0006367	transcription initiation from RNA polymerase II promoter	14	4.90799	0.000207745
GO:0006366	transcription from RNA polymerase II promoter	10	3.57875	0.00198454
GO:0006352	transcription initiation	1	0.613499	0.476644
GO:0006351	transcription, DNA-dependent	3	2.96525	0.581363
Cluster 9: G2/M transition of mitotic cell cycle
observed gene count: 3
expected gene count: 0.408999451252972
uncorrected p-value: 0.00393074562623119
GO ID	term	observed gene count	expected gene count	uncorrected p-value
GO:0000086	G2/M transition of mitotic cell cycle	3	0.408999	0.00393075
Cluster 10: gene silencing
observed gene count: 6
expected gene count: 1.73824766782513
uncorrected p-value: 0.00513668084926046
GO ID	term	observed gene count	expected gene count	uncorrected p-value
GO:0016458	gene silencing	2	0.408999	0.0544432
GO:0016441	posttranscriptional gene silencing	1	0.10225	0.10225
GO:0035194	posttranscriptional gene silencing by RNA	1	0.10225	0.10225
GO:0035195	gene silencing by miRNA	2	0.817999	0.193538
Cluster 11: meiosis
observed gene count: 11
expected gene count: 5.2147430034754
uncorrected p-value: 0.0123373350827247
GO ID	term	observed gene count	expected gene count	uncorrected p-value
GO:0016321	female meiosis chromosome segregation	4	1.32925	0.0365219
GO:0007143	female meiosis	3	1.12475	0.0942199
GO:0007127	meiosis I	1	0.2045	0.194061
GO:0007126	meiosis	2	1.32925	0.389742
GO:0007059	chromosome segregation	2	1.636	0.497812
Cluster 12: cell cycle checkpoint
observed gene count: 4
expected gene count: 1.02249862813243
uncorrected p-value: 0.0137367249962534
GO ID	term	observed gene count	expected gene count	uncorrected p-value
GO:0000077	DNA damage checkpoint	4	0.920249	0.00895658
GO:0000075	cell cycle checkpoint	1	0.408999	0.350517
Cluster 13: oogenesis
observed gene count: 29
expected gene count: 19.1207243460765
uncorrected p-value: 0.0139903573483294
GO ID	term	observed gene count	expected gene count	uncorrected p-value
GO:0007307	eggshell chorion gene amplification	5	1.12475	0.00300177
GO:0048477	oogenesis	19	10.634	0.00830048
GO:0007281	germ cell development	4	1.4315	0.0471182
GO:0046843	dorsal appendage formation	3	1.4315	0.165922
GO:0006277	DNA amplification	1	0.2045	0.194061
GO:0030707	ovarian follicle cell development	2	2.35175	0.697759
GO:0032504	multicellular organism reproduction	1	4.08999	0.986844
Cluster 14: stem cell division
observed gene count: 8
expected gene count: 3.47649533565027
uncorrected p-value: 0.0187323965944933
GO ID	term	observed gene count	expected gene count	uncorrected p-value
GO:0017145	stem cell division	2	0.30675	0.029187
GO:0007281	germ cell development	4	1.4315	0.0471182
GO:0042078	germ-line stem cell division	2	0.920249	0.232868
GO:0008356	asymmetric cell division	2	1.227	0.351391
Cluster 15: chromosome segregation
observed gene count: 7
expected gene count: 2.96524602158405
uncorrected p-value: 0.0238016498984971
GO ID	term	observed gene count	expected gene count	uncorrected p-value
GO:0000070	mitotic sister chromatid segregation	5	1.12475	0.00300177
GO:0000819	sister chromatid segregation	1	0.408999	0.350517
GO:0007059	chromosome segregation	2	1.636	0.497812
Cluster 16: mRNA catabolic process
observed gene count: 3
expected gene count: 0.715749039692702
uncorrected p-value: 0.0271781472721447
GO ID	term	observed gene count	expected gene count	uncorrected p-value
GO:0006402	mRNA catabolic process	2	0.2045	0.0104382
GO:0000956	nuclear-transcribed mRNA catabolic process	1	0.30675	0.276499
Cluster 17: spliceosome assembly
observed gene count: 3
expected gene count: 0.715749039692702
uncorrected p-value: 0.0271781472721447
GO ID	term	observed gene count	expected gene count	uncorrected p-value
GO:0000245	spliceosome assembly	2	0.511249	0.0846847
GO:0022618	ribonucleoprotein complex assembly	1	0.2045	0.194061
Cluster 18: telomere maintenance
observed gene count: 4
expected gene count: 1.22699835375892
uncorrected p-value: 0.0274476011229811
GO ID	term	observed gene count	expected gene count	uncorrected p-value
GO:0000723	telomere maintenance	3	0.715749	0.0271781
GO:0006302	double-strand break repair	2	0.613499	0.118632
Cluster 19: histone demethylation
observed gene count: 2
expected gene count: 0.306749588439729
uncorrected p-value: 0.0291869635007673
GO ID	term	observed gene count	expected gene count	uncorrected p-value
GO:0016577	histone demethylation	2	0.30675	0.029187
Cluster 20: axonogenesis
observed gene count: 30
expected gene count: 21.9837205048473
uncorrected p-value: 0.0465364533113108
GO ID	term	observed gene count	expected gene count	uncorrected p-value
GO:0048813	dendrite morphogenesis	11	6.95299	0.0824656
GO:0048812	neuron projection morphogenesis	12	7.87324	0.089849
GO:0007517	muscle organ development	5	3.272	0.224359
GO:0000902	cell morphogenesis	5	3.4765	0.264076
GO:0048666	neuron development	3	1.94275	0.306623
GO:0007409	axonogenesis	3	3.0675	0.605016
Cluster 21: mRNA polyadenylation
observed gene count: 4
expected gene count: 1.53374794219865
uncorrected p-value: 0.0592316659520587
GO ID	term	observed gene count	expected gene count	uncorrected p-value
GO:0006378	mRNA polyadenylation	4	1.53375	0.0592317
Cluster 22: histone exchange
observed gene count: 9
expected gene count: 5.11249314066215
uncorrected p-value: 0.0639918858437535
GO ID	term	observed gene count	expected gene count	uncorrected p-value
GO:0016573	histone acetylation	3	0.715749	0.0271781
GO:0043486	histone exchange	1	0.2045	0.194061
GO:0051276	chromosome organization	2	1.12475	0.312239
GO:0006325	chromatin organization	2	1.227	0.351391
GO:0006338	chromatin remodeling	2	1.4315	0.427045
Cluster 23: centrosome cycle
observed gene count: 12
expected gene count: 7.46423998536675
uncorrected p-value: 0.0649794605106487
GO ID	term	observed gene count	expected gene count	uncorrected p-value
GO:0051299	centrosome separation	3	0.715749	0.0271781
GO:0051297	centrosome organization	6	2.96525	0.0690351
GO:0007099	centriole replication	2	0.715749	0.155213
GO:0007098	centrosome cycle	1	0.613499	0.476644
GO:0051298	centrosome duplication	3	4.70349	0.863423
Cluster 24: cellularization
observed gene count: 5
expected gene count: 2.35174684470459
uncorrected p-value: 0.078498857079367
GO ID	term	observed gene count	expected gene count	uncorrected p-value
GO:0007279	pole cell formation	4	0.817999	0.00540909
GO:0007349	cellularization	2	1.53375	0.463114
Cluster 25: protein deneddylation
observed gene count: 4
expected gene count: 1.73824766782513
uncorrected p-value: 0.0878668682821826
GO ID	term	observed gene count	expected gene count	uncorrected p-value
GO:0050821	protein stabilization	4	1.227	0.0274476
GO:0000338	protein deneddylation	1	0.30675	0.276499
Cluster 26: cell motion
observed gene count: 1
expected gene count: 0.102249862813243
uncorrected p-value: 0.102249862813243
GO ID	term	observed gene count	expected gene count	uncorrected p-value
GO:0006928	cell motion	1	0.10225	0.10225
Cluster 27: cell motion
observed gene count: 1
expected gene count: 0.102249862813243
uncorrected p-value: 0.102249862813243
GO ID	term	observed gene count	expected gene count	uncorrected p-value
GO:0006928	cell motion	1	0.10225	0.10225
Cluster 28: methylation
observed gene count: 5
expected gene count: 2.76074629595756
uncorrected p-value: 0.13514941652043
GO ID	term	observed gene count	expected gene count	uncorrected p-value
GO:0032259	methylation	3	0.715749	0.0271781
GO:0006479	protein amino acid methylation	1	0.10225	0.10225
GO:0016571	histone methylation	1	0.817999	0.578313
Cluster 29: regulation of protein localization
observed gene count: 4
expected gene count: 2.1472471190781
uncorrected p-value: 0.160700278748751
GO ID	term	observed gene count	expected gene count	uncorrected p-value
GO:0051533	positive regulation of NFAT protein import into nucleus	3	0.920249	0.0558811
GO:0032880	regulation of protein localization	1	0.30675	0.276499
Cluster 30: segmentation
observed gene count: 15
expected gene count: 11.4519846350832
uncorrected p-value: 0.167132265483686
GO ID	term	observed gene count	expected gene count	uncorrected p-value
GO:0007281	germ cell development	4	1.4315	0.0471182
GO:0007314	oocyte anterior/posterior axis specification	3	1.4315	0.165922
GO:0007309	oocyte axis specification	2	0.920249	0.232868
GO:0009948	anterior/posterior axis specification	1	0.30675	0.276499
GO:0035282	segmentation	1	0.408999	0.350517
GO:0008298	intracellular mRNA localization	2	1.227	0.351391
GO:0007315	pole plasm assembly	1	0.715749	0.530216
GO:0008595	determination of anterior/posterior axis, embryo	2	1.94275	0.592869
GO:0030707	ovarian follicle cell development	2	2.35175	0.697759
GO:0007350	blastoderm segmentation	1	1.32925	0.754351
Cluster 31: cell motion
observed gene count: 3
expected gene count: 1.53374794219865
uncorrected p-value: 0.192594536155047
GO ID	term	observed gene count	expected gene count	uncorrected p-value
GO:0006928	cell motion	1	0.10225	0.10225
GO:0007297	ovarian follicle cell migration	1	0.511249	0.416975
GO:0016477	cell migration	1	0.920249	0.621494
Cluster 32: adult behavior
observed gene count: 4
expected gene count: 2.35174684470459
uncorrected p-value: 0.203265306406703
GO ID	term	observed gene count	expected gene count	uncorrected p-value
GO:0030534	adult behavior	1	0.10225	0.10225
GO:0008344	adult locomotory behavior	3	1.53375	0.192595
Cluster 33: GPI anchor metabolic process
observed gene count: 6
expected gene count: 3.98774464971648
uncorrected p-value: 0.203431447467544
GO ID	term	observed gene count	expected gene count	uncorrected p-value
GO:0006505	GPI anchor metabolic process	1	0.2045	0.194061
GO:0008654	phospholipid biosynthetic process	2	1.12475	0.312239
GO:0006497	protein amino acid lipidation	1	0.408999	0.350517
GO:0006506	GPI anchor biosynthetic process	2	1.4315	0.427045
Cluster 34: syncytial blastoderm mitotic cell cycle
observed gene count: 2
expected gene count: 0.920248765319188
uncorrected p-value: 0.232867917997254
GO ID	term	observed gene count	expected gene count	uncorrected p-value
GO:0035186	syncytial blastoderm mitotic cell cycle	2	0.613499	0.118632
Cluster 35: regulation of RNA splicing
observed gene count: 6
expected gene count: 4.29449423815621
uncorrected p-value: 0.255214264988781
GO ID	term	observed gene count	expected gene count	uncorrected p-value
GO:0048024	regulation of nuclear mRNA splicing, via spliceosome	2	0.408999	0.0544432
GO:0043484	regulation of RNA splicing	1	0.30675	0.276499
GO:0000381	regulation of alternative nuclear mRNA splicing, via spliceosome	3	3.78324	0.744915
Cluster 36: response to heat
observed gene count: 6
expected gene count: 4.39674410096945
uncorrected p-value: 0.273229436987665
GO ID	term	observed gene count	expected gene count	uncorrected p-value
GO:0009408	response to heat	6	4.19224	0.237542
Cluster 37: nucleotide biosynthetic process
observed gene count: 1
expected gene count: 0.306749588439729
uncorrected p-value: 0.276498745698734
GO ID	term	observed gene count	expected gene count	uncorrected p-value
GO:0009165	nucleotide biosynthetic process	1	0.30675	0.276499
Cluster 38: RNA processing
observed gene count: 19
expected gene count: 16.5644777757454
uncorrected p-value: 0.296790815020127
GO ID	term	observed gene count	expected gene count	uncorrected p-value
GO:0000245	spliceosome assembly	2	0.511249	0.0846847
GO:0006396	RNA processing	2	1.4315	0.427045
GO:0006397	mRNA processing	2	1.4315	0.427045
GO:0000398	nuclear mRNA splicing, via spliceosome	13	13.906	0.644967
Cluster 39: wing disc development
observed gene count: 10
expected gene count: 8.38448875068593
uncorrected p-value: 0.326814940472783
GO ID	term	observed gene count	expected gene count	uncorrected p-value
GO:0048190	wing disc dorsal/ventral pattern formation	3	1.8405	0.277462
GO:0007447	imaginal disc pattern formation	1	0.511249	0.416975
GO:0035222	wing disc pattern formation	1	0.511249	0.416975
GO:0035220	wing disc development	5	4.29449	0.431626
Cluster 40: cell fate determination
observed gene count: 4
expected gene count: 3.16974574721054
uncorrected p-value: 0.392676018658079
GO ID	term	observed gene count	expected gene count	uncorrected p-value
GO:0001709	cell fate determination	3	1.227	0.116477
GO:0008356	asymmetric cell division	2	1.227	0.351391
Cluster 41: nucleus localization
observed gene count: 1
expected gene count: 0.511249314066215
uncorrected p-value: 0.41697541242064
GO ID	term	observed gene count	expected gene count	uncorrected p-value
GO:0051647	nucleus localization	1	0.2045	0.194061
Cluster 42: chromatin silencing
observed gene count: 26
expected gene count: 24.9489665264313
uncorrected p-value: 0.442409551155405
GO ID	term	observed gene count	expected gene count	uncorrected p-value
GO:0006342	chromatin silencing	4	1.8405	0.104264
GO:0045892	negative regulation of transcription, DNA-dependent	5	3.16975	0.20522
GO:0010629	negative regulation of gene expression	3	2.2495	0.394064
GO:0006355	regulation of transcription, DNA-dependent	14	16.9735	0.815519
GO:0000122	negative regulation of transcription from RNA polymerase II promoter	4	6.23724	0.883558
Cluster 43: rRNA processing
observed gene count: 6
expected gene count: 5.31699286628864
uncorrected p-value: 0.442560556637812
GO ID	term	observed gene count	expected gene count	uncorrected p-value
GO:0006364	rRNA processing	4	2.6585	0.272144
GO:0042254	ribosome biogenesis	3	2.76075	0.531462
Cluster 44: protein targeting
observed gene count: 17
expected gene count: 16.5644777757454
uncorrected p-value: 0.493561229539881
GO ID	term	observed gene count	expected gene count	uncorrected p-value
GO:0006606	protein import into nucleus	6	1.636	0.00363277
GO:0034613	cellular protein localization	1	0.10225	0.10225
GO:0008104	protein localization	5	2.96525	0.168749
GO:0006605	protein targeting	1	0.511249	0.416975
GO:0006886	intracellular protein transport	5	6.33949	0.774291
GO:0015031	protein transport	1	4.90799	0.994489
Cluster 45: positive regulation of mitotic cell cycle
observed gene count: 1
expected gene count: 0.715749039692702
uncorrected p-value: 0.530216025062519
GO ID	term	observed gene count	expected gene count	uncorrected p-value
GO:0045931	positive regulation of mitotic cell cycle	1	0.30675	0.276499
Cluster 46: regulation of transcription, DNA-dependent
observed gene count: 22
expected gene count: 22.290470093287
uncorrected p-value: 0.560809468672002
GO ID	term	observed gene count	expected gene count	uncorrected p-value
GO:0006357	regulation of transcription from RNA polymerase II promoter	8	6.44174	0.313503
GO:0006355	regulation of transcription, DNA-dependent	14	16.9735	0.815519
Cluster 47: positive regulation of gene expression
observed gene count: 11
expected gene count: 11.1452350466435
uncorrected p-value: 0.56597310156178
GO ID	term	observed gene count	expected gene count	uncorrected p-value
GO:0010628	positive regulation of gene expression	3	0.920249	0.0558811
GO:0045893	positive regulation of transcription, DNA-dependent	4	3.4765	0.464074
GO:0045944	positive regulation of transcription from RNA polymerase II promoter	6	8.07774	0.832305
Cluster 48: dorsal closure
observed gene count: 11
expected gene count: 11.5542344978965
uncorrected p-value: 0.615659692600348
GO ID	term	observed gene count	expected gene count	uncorrected p-value
GO:0007163	establishment or maintenance of cell polarity	3	1.636	0.220232
GO:0001738	morphogenesis of a polarized epithelium	2	0.920249	0.232868
GO:0001700	embryonic development via the syncytial blastoderm	4	2.55625	0.248674
GO:0009792	embryonic development ending in birth or egg hatching	1	0.408999	0.350517
GO:0001736	establishment of planar polarity	2	1.32925	0.389742
GO:0007164	establishment of tissue polarity	1	0.511249	0.416975
GO:0046328	regulation of JNK cascade	1	0.715749	0.530216
GO:0007391	dorsal closure	4	5.01024	0.75274
Cluster 49: determination of adult life span
observed gene count: 8
expected gene count: 8.48673861349918
uncorrected p-value: 0.624619386103324
GO ID	term	observed gene count	expected gene count	uncorrected p-value
GO:0008340	determination of adult life span	8	8.38449	0.610591
Cluster 50: cell adhesion
observed gene count: 8
expected gene count: 8.99798792756539
uncorrected p-value: 0.69044705455092
GO ID	term	observed gene count	expected gene count	uncorrected p-value
GO:0022604	regulation of cell morphogenesis	1	0.10225	0.10225
GO:0008360	regulation of cell shape	6	5.41924	0.461321
GO:0007155	cell adhesion	5	5.93049	0.721183
Cluster 51: transmembrane receptor protein tyrosine kinase signaling pathway
observed gene count: 1
expected gene count: 1.12474849094567
uncorrected p-value: 0.695061697141821
GO ID	term	observed gene count	expected gene count	uncorrected p-value
GO:0007169	transmembrane receptor protein tyrosine kinase signaling pathway	1	0.715749	0.530216
Cluster 52: actin filament organization
observed gene count: 5
expected gene count: 6.13499176879459
uncorrected p-value: 0.748774360763215
GO ID	term	observed gene count	expected gene count	uncorrected p-value
GO:0030029	actin filament-based process	1	0.408999	0.350517
GO:0007015	actin filament organization	4	4.08999	0.595916
GO:0030036	actin cytoskeleton organization	2	2.76075	0.77925
Cluster 53: phosphorylation
observed gene count: 16
expected gene count: 18.507225169197
uncorrected p-value: 0.769337585142907
GO ID	term	observed gene count	expected gene count	uncorrected p-value
GO:0006468	protein amino acid phosphorylation	14	15.0307	0.652882
GO:0016311	dephosphorylation	1	1.53375	0.80213
GO:0016310	phosphorylation	1	1.94275	0.871648
Cluster 54: endocytosis
observed gene count: 19
expected gene count: 22.69946954454
uncorrected p-value: 0.82839467350585
GO ID	term	observed gene count	expected gene count	uncorrected p-value
GO:0006911	phagocytosis, engulfment	17	12.7812	0.134582
GO:0016044	membrane organization	1	0.613499	0.476644
GO:0006897	endocytosis	1	3.0675	0.961032
Cluster 55: cell growth
observed gene count: 16
expected gene count: 19.8364733857692
uncorrected p-value: 0.853330734054045
GO ID	term	observed gene count	expected gene count	uncorrected p-value
GO:0007444	imaginal disc development	3	1.32925	0.140464
GO:0048589	developmental growth	1	0.2045	0.194061
GO:0008361	regulation of cell size	2	0.920249	0.232868
GO:0016049	cell growth	2	1.0225	0.272599
GO:0002164	larval development	1	0.408999	0.350517
GO:0035220	wing disc development	5	4.29449	0.431626
GO:0002168	instar larval development	2	1.94275	0.592869
GO:0007552	metamorphosis	1	1.227	0.726304
GO:0007476	imaginal disc-derived wing morphogenesis	5	8.99799	0.954819
Cluster 56: apoptosis
observed gene count: 2
expected gene count: 3.27199561002378
uncorrected p-value: 0.853585443275707
GO ID	term	observed gene count	expected gene count	uncorrected p-value
GO:0012501	programmed cell death	1	0.10225	0.10225
GO:0043067	regulation of programmed cell death	1	0.408999	0.350517
GO:0006915	apoptosis	1	1.4315	0.779529
Cluster 57: synaptic transmission
observed gene count: 7
expected gene count: 9.81598683007134
uncorrected p-value: 0.873699833117784
GO ID	term	observed gene count	expected gene count	uncorrected p-value
GO:0045886	negative regulation of synaptic growth at neuromuscular junction	4	1.4315	0.0471182
GO:0050807	regulation of synapse organization	1	0.715749	0.530216
GO:0008582	regulation of synaptic growth at neuromuscular junction	2	1.73825	0.531041
GO:0007268	synaptic transmission	1	2.863	0.951592
Cluster 58: nucleosome assembly
observed gene count: 4
expected gene count: 6.23724163160783
uncorrected p-value: 0.883557994152081
GO ID	term	observed gene count	expected gene count	uncorrected p-value
GO:0065004	protein-DNA complex assembly	1	0.2045	0.194061
GO:0006334	nucleosome assembly	3	5.72599	0.935823
GO:0006333	chromatin assembly or disassembly	2	5.31699	0.975102
Cluster 59: learning or memory
observed gene count: 1
expected gene count: 2.1472471190781
uncorrected p-value: 0.896638212234859
GO ID	term	observed gene count	expected gene count	uncorrected p-value
GO:0007611	learning or memory	1	2.14725	0.896638
Cluster 60: compound eye development
observed gene count: 9
expected gene count: 13.4969818913481
uncorrected p-value: 0.933920391595101
GO ID	term	observed gene count	expected gene count	uncorrected p-value
GO:0001751	compound eye photoreceptor cell differentiation	2	1.227	0.351391
GO:0007423	sensory organ development	3	2.6585	0.505296
GO:0001745	compound eye morphogenesis	3	4.90799	0.882035
GO:0048749	compound eye development	2	5.72599	0.982827
Cluster 61: translation
observed gene count: 2
expected gene count: 17.8937259923175
uncorrected p-value: 0.99999990068311
GO ID	term	observed gene count	expected gene count	uncorrected p-value
GO:0006412	translation	2	17.7915	1

## Sheet: WEE_50-60-FEmbryo0-2h
sample name: WEE_50-60-FEmbryo0-2h
number of associated genes in the sample: 395
Cluster 1: DNA replication
observed gene count: 19
expected gene count: 2.96231937077008
uncorrected p-value: 7.61042485460198e-12
GO ID	term	observed gene count	expected gene count	uncorrected p-value
GO:0006260	DNA replication	17	2.38431	1.13762e-11
GO:0006261	DNA-dependent DNA replication	7	0.86702	5.62306e-06
Cluster 2: cell cycle checkpoint
observed gene count: 20
expected gene count: 5.78013535760015
uncorrected p-value: 5.7726130418419e-07
GO ID	term	observed gene count	expected gene count	uncorrected p-value
GO:0007094	mitotic cell cycle spindle assembly checkpoint	3	0.361258	0.00335372
GO:0007088	regulation of mitosis	4	0.722517	0.00396998
GO:0007093	mitotic cell cycle checkpoint	3	0.43351	0.00634918
GO:0000075	cell cycle checkpoint	2	0.289007	0.0283327
GO:0051726	regulation of cell cycle	7	3.10682	0.0326529
GO:0007346	regulation of mitotic cell cycle	3	1.01152	0.075077
GO:0030071	regulation of mitotic metaphase/anaphase transition	1	0.289007	0.25923
Cluster 3: mitosis
observed gene count: 43
expected gene count: 19.8692152917505
uncorrected p-value: 7.37384269784552e-07
GO ID	term	observed gene count	expected gene count	uncorrected p-value
GO:0007049	cell cycle	11	2.16755	3.79784e-06
GO:0007052	mitotic spindle organization	20	9.32047	0.000843918
GO:0007067	mitosis	11	4.04609	0.00186981
GO:0000087	M phase of mitotic cell cycle	2	0.216755	0.0148751
GO:0000278	mitotic cell cycle	5	1.58954	0.0181232
GO:0007017	microtubule-based process	4	1.9508	0.126496
GO:0000226	microtubule cytoskeleton organization	3	1.44503	0.171829
GO:0000280	nuclear division	1	0.216755	0.201505
GO:0007010	cytoskeleton organization	1	1.87854	0.858366
Cluster 4: chromosome condensation
observed gene count: 9
expected gene count: 1.30053045546003
uncorrected p-value: 1.32726669409982e-06
GO ID	term	observed gene count	expected gene count	uncorrected p-value
GO:0006270	DNA replication initiation	7	0.650265	3.0971e-07
GO:0006267	pre-replicative complex assembly	5	0.361258	1.92308e-06
GO:0030261	chromosome condensation	6	0.939272	0.000151856
Cluster 5: proteolysis
observed gene count: 33
expected gene count: 14.5225900859704
uncorrected p-value: 5.32387640447813e-06
GO ID	term	observed gene count	expected gene count	uncorrected p-value
GO:0006511	ubiquitin-dependent protein catabolic process	16	3.90159	6.70995e-07
GO:0051603	proteolysis involved in cellular protein catabolic process	6	0.505762	9.02503e-07
GO:0030163	protein catabolic process	5	1.30053	0.00748623
GO:0006508	proteolysis	19	11.1268	0.0144726
Cluster 6: DNA repair
observed gene count: 19
expected gene count: 7.36967258094019
uncorrected p-value: 0.000100503536141136
GO ID	term	observed gene count	expected gene count	uncorrected p-value
GO:0006974	response to DNA damage stimulus	14	4.98537	0.000328892
GO:0006281	DNA repair	5	2.67331	0.124975
Cluster 7: centrosome cycle
observed gene count: 10
expected gene count: 2.60106091092007
uncorrected p-value: 0.000159675429171427
GO ID	term	observed gene count	expected gene count	uncorrected p-value
GO:0051299	centrosome separation	4	0.505762	0.000788294
GO:0051297	centrosome organization	7	2.0953	0.00377474
GO:0007098	centrosome cycle	1	0.43351	0.362488
Cluster 8: gene silencing
observed gene count: 5
expected gene count: 0.650265227730016
uncorrected p-value: 0.000189703356291083
GO ID	term	observed gene count	expected gene count	uncorrected p-value
GO:0016458	gene silencing	3	0.289007	0.00141748
GO:0035194	posttranscriptional gene silencing by RNA	1	0.0722517	0.0722517
GO:0016441	posttranscriptional gene silencing	1	0.0722517	0.0722517
Cluster 9: meiosis
observed gene count: 11
expected gene count: 3.68483629047009
uncorrected p-value: 0.000829607012881499
GO ID	term	observed gene count	expected gene count	uncorrected p-value
GO:0016321	female meiosis chromosome segregation	4	0.939272	0.0113614
GO:0007143	female meiosis	3	0.794769	0.0399382
GO:0007127	meiosis I	1	0.144503	0.139295
GO:0007126	meiosis	2	0.939272	0.240819
GO:0007059	chromosome segregation	2	1.15603	0.323491
Cluster 10: G2/M transition of mitotic cell cycle
observed gene count: 3
expected gene count: 0.289006767880007
uncorrected p-value: 0.00141747968709948
GO ID	term	observed gene count	expected gene count	uncorrected p-value
GO:0000086	G2/M transition of mitotic cell cycle	3	0.289007	0.00141748
Cluster 11: oogenesis
observed gene count: 23
expected gene count: 12.3550393268703
uncorrected p-value: 0.00256061461240336
GO ID	term	observed gene count	expected gene count	uncorrected p-value
GO:0048477	oogenesis	18	7.51418	0.000396673
GO:0007307	eggshell chorion gene amplification	5	0.794769	0.000615859
GO:0006277	DNA amplification	1	0.144503	0.139295
GO:0007304	chorion-containing eggshell formation	1	0.361258	0.312791
GO:0030707	ovarian follicle cell development	1	1.66179	0.822449
GO:0032504	multicellular organism reproduction	1	2.89007	0.950756
Cluster 12: transcription initiation
observed gene count: 15
expected gene count: 6.79165904518017
uncorrected p-value: 0.00275435557497982
GO ID	term	observed gene count	expected gene count	uncorrected p-value
GO:0006367	transcription initiation from RNA polymerase II promoter	11	3.46808	0.000479204
GO:0006366	transcription from RNA polymerase II promoter	6	2.52881	0.0371738
GO:0006352	transcription initiation	1	0.43351	0.362488
GO:0006351	transcription, DNA-dependent	2	2.0953	0.630481
Cluster 13: chromosome segregation
observed gene count: 7
expected gene count: 2.09529906713005
uncorrected p-value: 0.00377473506710173
GO ID	term	observed gene count	expected gene count	uncorrected p-value
GO:0000070	mitotic sister chromatid segregation	5	0.794769	0.000615859
GO:0000819	sister chromatid segregation	1	0.289007	0.25923
GO:0007059	chromosome segregation	2	1.15603	0.323491
Cluster 14: cell cycle checkpoint
observed gene count: 4
expected gene count: 0.722516919700018
uncorrected p-value: 0.00396998362909907
GO ID	term	observed gene count	expected gene count	uncorrected p-value
GO:0000077	DNA damage checkpoint	3	0.650265	0.022647
GO:0000075	cell cycle checkpoint	2	0.289007	0.0283327
Cluster 15: protein deneddylation
observed gene count: 5
expected gene count: 1.22827876349003
uncorrected p-value: 0.00574098665881096
GO ID	term	observed gene count	expected gene count	uncorrected p-value
GO:0050821	protein stabilization	4	0.86702	0.00833315
GO:0000338	protein deneddylation	1	0.216755	0.201505
GO:0031647	regulation of protein stability	1	0.289007	0.25923
Cluster 16: gene silencing
observed gene count: 32
expected gene count: 21.0974940552405
uncorrected p-value: 0.0107205172659488
GO ID	term	observed gene count	expected gene count	uncorrected p-value
GO:0016458	gene silencing	3	0.289007	0.00141748
GO:0006342	chromatin silencing	5	1.30053	0.00748623
GO:0045892	negative regulation of transcription, DNA-dependent	5	2.2398	0.0688774
GO:0010629	negative regulation of gene expression	3	1.58954	0.20949
GO:0006355	regulation of transcription, DNA-dependent	14	11.9938	0.311872
GO:0000122	negative regulation of transcription from RNA polymerase II promoter	5	4.40735	0.453497
GO:0006357	regulation of transcription from RNA polymerase II promoter	5	4.55186	0.482148
Cluster 17: telomere maintenance
observed gene count: 3
expected gene count: 0.578013535760015
uncorrected p-value: 0.015939581857575
GO ID	term	observed gene count	expected gene count	uncorrected p-value
GO:0000723	telomere maintenance	3	0.505762	0.0105199
Cluster 18: mRNA polyadenylation
observed gene count: 4
expected gene count: 1.08377537955003
uncorrected p-value: 0.0193334404221112
GO ID	term	observed gene count	expected gene count	uncorrected p-value
GO:0006378	mRNA polyadenylation	4	1.08378	0.0193334
Cluster 19: cellularization
observed gene count: 5
expected gene count: 1.66178891531004
uncorrected p-value: 0.0218228944579582
GO ID	term	observed gene count	expected gene count	uncorrected p-value
GO:0007279	pole cell formation	4	0.578014	0.00148697
GO:0007349	cellularization	2	1.08378	0.296047
Cluster 20: mRNA transport
observed gene count: 17
expected gene count: 10.4042436436803
uncorrected p-value: 0.0295397375811449
GO ID	term	observed gene count	expected gene count	uncorrected p-value
GO:0006406	mRNA export from nucleus	9	1.01152	7.10292e-08
GO:0006913	nucleocytoplasmic transport	4	0.505762	0.000788294
GO:0034613	cellular protein localization	1	0.0722517	0.0722517
GO:0051168	nuclear export	1	0.289007	0.25923
GO:0051028	mRNA transport	1	0.361258	0.312791
GO:0006886	intracellular protein transport	4	4.4796	0.6651
Cluster 21: stem cell division
observed gene count: 6
expected gene count: 2.45655752698006
uncorrected p-value: 0.0327174905943824
GO ID	term	observed gene count	expected gene count	uncorrected p-value
GO:0017145	stem cell division	2	0.216755	0.0148751
GO:0042078	germ-line stem cell division	2	0.650265	0.133813
GO:0007281	germ cell development	2	1.01152	0.268442
GO:0008356	asymmetric cell division	1	0.86702	0.593788
Cluster 22: neuron development
observed gene count: 21
expected gene count: 14.3780867020304
uncorrected p-value: 0.0494375529580899
GO ID	term	observed gene count	expected gene count	uncorrected p-value
GO:0048813	dendrite morphogenesis	12	4.91312	0.00306043
GO:0007517	muscle organ development	6	2.31205	0.0248818
GO:0048666	neuron development	4	1.37278	0.0437055
GO:0048812	neuron projection morphogenesis	6	5.56338	0.486119
GO:0000902	cell morphogenesis	2	2.45656	0.716052
Cluster 23: regulation of DNA replication
observed gene count: 2
expected gene count: 0.433510151820011
uncorrected p-value: 0.0643034263955546
GO ID	term	observed gene count	expected gene count	uncorrected p-value
GO:0006275	regulation of DNA replication	1	0.216755	0.201505
GO:0008156	negative regulation of DNA replication	1	0.216755	0.201505
Cluster 24: cell motion
observed gene count: 1
expected gene count: 0.0722516919700018
uncorrected p-value: 0.0722516919700018
GO ID	term	observed gene count	expected gene count	uncorrected p-value
GO:0006928	cell motion	1	0.0722517	0.0722517
Cluster 25: regulation of nuclear mRNA splicing, via spliceosome
observed gene count: 6
expected gene count: 3.03457106274008
uncorrected p-value: 0.0789978114299405
GO ID	term	observed gene count	expected gene count	uncorrected p-value
GO:0048024	regulation of nuclear mRNA splicing, via spliceosome	2	0.289007	0.0283327
GO:0000381	regulation of alternative nuclear mRNA splicing, via spliceosome	4	2.67331	0.276865
Cluster 26: wing disc development
observed gene count: 11
expected gene count: 7.15291750503018
uncorrected p-value: 0.0996418693726543
GO ID	term	observed gene count	expected gene count	uncorrected p-value
GO:0007444	imaginal disc development	3	0.939272	0.0622068
GO:0035222	wing disc pattern formation	1	0.361258	0.312791
GO:0007447	imaginal disc pattern formation	1	0.361258	0.312791
GO:0048190	wing disc dorsal/ventral pattern formation	2	1.30053	0.377434
GO:0009953	dorsal/ventral pattern formation	1	0.794769	0.562084
GO:0035220	wing disc development	3	3.03457	0.593972
Cluster 27: histone acetylation
observed gene count: 6
expected gene count: 3.39582952259009
uncorrected p-value: 0.120300341497249
GO ID	term	observed gene count	expected gene count	uncorrected p-value
GO:0051276	chromosome organization	2	0.794769	0.186195
GO:0006325	chromatin organization	2	0.86702	0.21334
GO:0016573	histone acetylation	1	0.505762	0.4086
GO:0006338	chromatin remodeling	1	1.01152	0.650491
Cluster 28: syncytial blastoderm mitotic cell cycle
observed gene count: 2
expected gene count: 0.650265227730016
uncorrected p-value: 0.133812794863159
GO ID	term	observed gene count	expected gene count	uncorrected p-value
GO:0035186	syncytial blastoderm mitotic cell cycle	2	0.43351	0.0643034
Cluster 29: determination of adult life span
observed gene count: 9
expected gene count: 5.99689043351015
uncorrected p-value: 0.142929264342005
GO ID	term	observed gene count	expected gene count	uncorrected p-value
GO:0008340	determination of adult life span	9	5.92464	0.135502
Cluster 30: centrosome cycle
observed gene count: 6
expected gene count: 3.9015913663801
uncorrected p-value: 0.19232885601616
GO ID	term	observed gene count	expected gene count	uncorrected p-value
GO:0007099	centriole replication	2	0.505762	0.0858169
GO:0007098	centrosome cycle	1	0.43351	0.362488
GO:0051298	centrosome duplication	4	3.32358	0.427737
Cluster 31: response to heat
observed gene count: 5
expected gene count: 3.10682275471008
uncorrected p-value: 0.196305313349531
GO ID	term	observed gene count	expected gene count	uncorrected p-value
GO:0009408	response to heat	5	2.96232	0.171093
Cluster 32: nucleotide biosynthetic process
observed gene count: 1
expected gene count: 0.216755075910005
uncorrected p-value: 0.201505466647451
GO ID	term	observed gene count	expected gene count	uncorrected p-value
GO:0009165	nucleotide biosynthetic process	1	0.216755	0.201505
Cluster 33: RNA processing
observed gene count: 14
expected gene count: 11.5602707152003
uncorrected p-value: 0.265083574464102
GO ID	term	observed gene count	expected gene count	uncorrected p-value
GO:0006396	RNA processing	2	1.01152	0.268442
GO:0000398	nuclear mRNA splicing, via spliceosome	12	9.82623	0.276773
Cluster 34: histone demethylation
observed gene count: 2
expected gene count: 1.01152368758003
uncorrected p-value: 0.268442080842813
GO ID	term	observed gene count	expected gene count	uncorrected p-value
GO:0016577	histone demethylation	2	0.216755	0.0148751
Cluster 35: nucleus localization
observed gene count: 1
expected gene count: 0.361258459850009
uncorrected p-value: 0.312790818202571
GO ID	term	observed gene count	expected gene count	uncorrected p-value
GO:0051647	nucleus localization	1	0.144503	0.139295
Cluster 36: cell motion
observed gene count: 9
expected gene count: 7.51417596488019
uncorrected p-value: 0.336591303335428
GO ID	term	observed gene count	expected gene count	uncorrected p-value
GO:0006928	cell motion	1	0.0722517	0.0722517
GO:0001700	embryonic development via the syncytial blastoderm	4	1.80629	0.101859
GO:0009792	embryonic development ending in birth or egg hatching	1	0.289007	0.25923
GO:0007163	establishment or maintenance of cell polarity	2	1.15603	0.323491
GO:0001738	morphogenesis of a polarized epithelium	1	0.650265	0.491081
GO:0007391	dorsal closure	3	3.54033	0.698269
Cluster 37: stem cell maintenance
observed gene count: 1
expected gene count: 0.433510151820011
uncorrected p-value: 0.362488296563974
GO ID	term	observed gene count	expected gene count	uncorrected p-value
GO:0019827	stem cell maintenance	1	0.361258	0.312791
Cluster 38: protein targeting
observed gene count: 13
expected gene count: 11.7047740991403
uncorrected p-value: 0.388305872522908
GO ID	term	observed gene count	expected gene count	uncorrected p-value
GO:0006606	protein import into nucleus	5	1.15603	0.00430353
GO:0034613	cellular protein localization	1	0.0722517	0.0722517
GO:0008104	protein localization	4	2.0953	0.15336
GO:0006605	protein targeting	1	0.361258	0.312791
GO:0006886	intracellular protein transport	4	4.4796	0.6651
Cluster 39: positive regulation of gene expression
observed gene count: 9
expected gene count: 7.8754344247302
uncorrected p-value: 0.389048050144411
GO ID	term	observed gene count	expected gene count	uncorrected p-value
GO:0010628	positive regulation of gene expression	3	0.650265	0.022647
GO:0045893	positive regulation of transcription, DNA-dependent	4	2.45656	0.228245
GO:0045944	positive regulation of transcription from RNA polymerase II promoter	4	5.70788	0.833078
Cluster 40: nuclear-transcribed mRNA catabolic process
observed gene count: 1
expected gene count: 0.505761843790013
uncorrected p-value: 0.408600203331458
GO ID	term	observed gene count	expected gene count	uncorrected p-value
GO:0000956	nuclear-transcribed mRNA catabolic process	1	0.216755	0.201505
Cluster 41: actin filament organization
observed gene count: 5
expected gene count: 4.33510151820011
uncorrected p-value: 0.439010739460785
GO ID	term	observed gene count	expected gene count	uncorrected p-value
GO:0030029	actin filament-based process	1	0.289007	0.25923
GO:0007015	actin filament organization	4	2.89007	0.326951
GO:0030036	actin cytoskeleton organization	2	1.9508	0.591029
Cluster 42: rRNA processing
observed gene count: 4
expected gene count: 3.75708798244009
uncorrected p-value: 0.524268622236204
GO ID	term	observed gene count	expected gene count	uncorrected p-value
GO:0006364	rRNA processing	3	1.87854	0.288975
GO:0042254	ribosome biogenesis	2	1.9508	0.591029
Cluster 43: endocytosis
observed gene count: 16
expected gene count: 16.0398756173404
uncorrected p-value: 0.543157012269998
GO ID	term	observed gene count	expected gene count	uncorrected p-value
GO:0006911	phagocytosis, engulfment	14	9.03146	0.0656386
GO:0006897	endocytosis	1	2.16755	0.895238
GO:0016192	vesicle-mediated transport	1	4.84086	0.993632
Cluster 44: segmentation
observed gene count: 7
expected gene count: 7.00841412109018
uncorrected p-value: 0.558491955507785
GO ID	term	observed gene count	expected gene count	uncorrected p-value
GO:0035282	segmentation	1	0.289007	0.25923
GO:0007281	germ cell development	2	1.01152	0.268442
GO:0007309	oocyte axis specification	1	0.650265	0.491081
GO:0008298	intracellular mRNA localization	1	0.86702	0.593788
GO:0007314	oocyte anterior/posterior axis specification	1	1.01152	0.650491
GO:0008595	determination of anterior/posterior axis, embryo	1	1.37278	0.760054
Cluster 45: methylation
observed gene count: 2
expected gene count: 1.95079568319005
uncorrected p-value: 0.591029126604964
GO ID	term	observed gene count	expected gene count	uncorrected p-value
GO:0032259	methylation	1	0.505762	0.4086
GO:0016571	histone methylation	1	0.578014	0.451385
Cluster 46: segmentation
observed gene count: 10
expected gene count: 10.8377537955003
uncorrected p-value: 0.652206296477002
GO ID	term	observed gene count	expected gene count	uncorrected p-value
GO:0035282	segmentation	1	0.289007	0.25923
GO:0035220	wing disc development	3	3.03457	0.593972
GO:0007476	imaginal disc-derived wing morphogenesis	6	6.35815	0.619305
Cluster 47: chromatin assembly
observed gene count: 4
expected gene count: 4.40735321017011
uncorrected p-value: 0.65237600089904
GO ID	term	observed gene count	expected gene count	uncorrected p-value
GO:0031497	chromatin assembly	1	0.0722517	0.0722517
GO:0006334	nucleosome assembly	4	4.04609	0.584087
GO:0006333	chromatin assembly or disassembly	3	3.75709	0.73628
Cluster 48: phosphorylation
observed gene count: 12
expected gene count: 13.0775562465703
uncorrected p-value: 0.666021136490174
GO ID	term	observed gene count	expected gene count	uncorrected p-value
GO:0006468	protein amino acid phosphorylation	10	10.621	0.626593
GO:0016311	dephosphorylation	1	1.08378	0.675808
GO:0016310	phosphorylation	1	1.37278	0.760054
Cluster 49: apoptosis
observed gene count: 2
expected gene count: 2.31205414304006
uncorrected p-value: 0.68400898360275
GO ID	term	observed gene count	expected gene count	uncorrected p-value
GO:0012501	programmed cell death	1	0.0722517	0.0722517
GO:0043067	regulation of programmed cell death	1	0.289007	0.25923
GO:0006915	apoptosis	1	1.01152	0.650491
Cluster 50: chromatin remodeling
observed gene count: 1
expected gene count: 1.37278214743003
uncorrected p-value: 0.760054366332698
GO ID	term	observed gene count	expected gene count	uncorrected p-value
GO:0006338	chromatin remodeling	1	1.01152	0.650491
Cluster 51: cell adhesion
observed gene count: 5
expected gene count: 6.35814889336016
uncorrected p-value: 0.772652135033269
GO ID	term	observed gene count	expected gene count	uncorrected p-value
GO:0008360	regulation of cell shape	4	3.82934	0.539616
GO:0007155	cell adhesion	4	4.1906	0.612316
Cluster 52: GPI anchor biosynthetic process
observed gene count: 2
expected gene count: 2.81781598683007
uncorrected p-value: 0.784366448867005
GO ID	term	observed gene count	expected gene count	uncorrected p-value
GO:0008654	phospholipid biosynthetic process	1	0.794769	0.562084
GO:0006506	GPI anchor biosynthetic process	1	1.01152	0.650491
Cluster 53: axonogenesis
observed gene count: 8
expected gene count: 10.9822571794403
uncorrected p-value: 0.868787575236315
GO ID	term	observed gene count	expected gene count	uncorrected p-value
GO:0007409	axonogenesis	3	2.16755	0.37025
GO:0007423	sensory organ development	2	1.87854	0.570159
GO:0001751	compound eye photoreceptor cell differentiation	1	0.86702	0.593788
GO:0001745	compound eye morphogenesis	3	3.46808	0.684713
GO:0048749	compound eye development	1	4.04609	0.985328
Cluster 54: regulation of synapse organization
observed gene count: 3
expected gene count: 5.78013535760015
uncorrected p-value: 0.935899709856077
GO ID	term	observed gene count	expected gene count	uncorrected p-value
GO:0008582	regulation of synaptic growth at neuromuscular junction	2	1.22828	0.350654
GO:0050807	regulation of synapse organization	1	0.505762	0.4086
Cluster 55: translation
observed gene count: 1
expected gene count: 12.6440460947503
uncorrected p-value: 0.999998400614627
GO ID	term	observed gene count	expected gene count	uncorrected p-value
GO:0006412	translation	1	12.5718	0.999998

## Sheet: WEE_50-90-FEmbryo0-2h
sample name: WEE_50-90-FEmbryo0-2h
number of associated genes in the sample: 356
Cluster 1: DNA replication
observed gene count: 20
expected gene count: 2.66983720504847
uncorrected p-value: 8.52354553210372e-14
GO ID	term	observed gene count	expected gene count	uncorrected p-value
GO:0006260	DNA replication	19	2.14889	6.40505e-15
GO:0006261	DNA-dependent DNA replication	6	0.781416	4.82893e-05
Cluster 2: cell cycle checkpoint
observed gene count: 21
expected gene count: 5.20943844887507
uncorrected p-value: 1.97514340904843e-08
GO ID	term	observed gene count	expected gene count	uncorrected p-value
GO:0007094	mitotic cell cycle spindle assembly checkpoint	4	0.32559	8.39311e-05
GO:0007093	mitotic cell cycle checkpoint	3	0.390708	0.00472291
GO:0051726	regulation of cell cycle	8	2.80007	0.00579022
GO:0030071	regulation of mitotic metaphase/anaphase transition	2	0.260472	0.0232368
GO:0007088	regulation of mitosis	3	0.65118	0.0233026
GO:0007346	regulation of mitotic cell cycle	3	0.911652	0.0582909
GO:0000075	cell cycle checkpoint	1	0.260472	0.236175
Cluster 3: mitosis
observed gene count: 42
expected gene count: 17.907444668008
uncorrected p-value: 1.07954438655747e-07
GO ID	term	observed gene count	expected gene count	uncorrected p-value
GO:0007049	cell cycle	14	1.95354	1.07268e-09
GO:0007052	mitotic spindle organization	17	8.40022	0.0039276
GO:0000278	mitotic cell cycle	5	1.4326	0.0119241
GO:0000087	M phase of mitotic cell cycle	2	0.195354	0.0121397
GO:0007067	mitosis	7	3.64661	0.0694067
GO:0000280	nuclear division	1	0.195354	0.18294
GO:0007017	microtubule-based process	3	1.75819	0.25568
GO:0000226	microtubule cytoskeleton organization	2	1.30236	0.377727
GO:0007010	cytoskeleton organization	1	1.69307	0.827069
Cluster 4: chromosome condensation
observed gene count: 9
expected gene count: 1.17212365099689
uncorrected p-value: 5.48087554654519e-07
GO ID	term	observed gene count	expected gene count	uncorrected p-value
GO:0006270	DNA replication initiation	7	0.586062	1.50706e-07
GO:0006267	pre-replicative complex assembly	5	0.32559	1.14038e-06
GO:0030261	chromosome condensation	6	0.846534	8.47858e-05
Cluster 5: proteolysis
observed gene count: 31
expected gene count: 13.0887141027986
uncorrected p-value: 4.54896585034886e-06
GO ID	term	observed gene count	expected gene count	uncorrected p-value
GO:0006511	ubiquitin-dependent protein catabolic process	15	3.51637	9.99273e-07
GO:0051603	proteolysis involved in cellular protein catabolic process	5	0.455826	2.14534e-05
GO:0006508	proteolysis	20	10.0282	0.00217576
GO:0030163	protein catabolic process	4	1.17212	0.0261012
Cluster 6: DNA repair
observed gene count: 19
expected gene count: 6.51179806109384
uncorrected p-value: 1.79421043317872e-05
GO ID	term	observed gene count	expected gene count	uncorrected p-value
GO:0006974	response to DNA damage stimulus	12	4.49314	0.0014459
GO:0006281	DNA repair	7	2.40937	0.00879924
Cluster 7: mRNA transport
observed gene count: 11
expected gene count: 2.80007316627035
uncorrected p-value: 6.62694537809933e-05
GO ID	term	observed gene count	expected gene count	uncorrected p-value
GO:0006406	mRNA export from nucleus	7	0.911652	1.07847e-05
GO:0006913	nucleocytoplasmic transport	4	0.455826	0.000528692
GO:0051168	nuclear export	1	0.260472	0.236175
GO:0051028	mRNA transport	1	0.32559	0.28595
Cluster 8: centrosome cycle
observed gene count: 9
expected gene count: 2.34424730199378
uncorrected p-value: 0.000371036459899445
GO ID	term	observed gene count	expected gene count	uncorrected p-value
GO:0051297	centrosome organization	7	1.88842	0.00209071
GO:0051299	centrosome separation	3	0.455826	0.00786857
GO:0007098	centrosome cycle	1	0.390708	0.33249
Cluster 9: transcription initiation
observed gene count: 15
expected gene count: 6.12109017742821
uncorrected p-value: 0.000976389614018457
GO ID	term	observed gene count	expected gene count	uncorrected p-value
GO:0006366	transcription from RNA polymerase II promoter	8	2.27913	0.00148304
GO:0006367	transcription initiation from RNA polymerase II promoter	9	3.12566	0.00330233
GO:0006351	transcription, DNA-dependent	3	1.88842	0.291884
GO:0006352	transcription initiation	1	0.390708	0.33249
Cluster 10: G2/M transition of mitotic cell cycle
observed gene count: 3
expected gene count: 0.260471922443753
uncorrected p-value: 0.00104270809858182
GO ID	term	observed gene count	expected gene count	uncorrected p-value
GO:0000086	G2/M transition of mitotic cell cycle	3	0.260472	0.00104271
Cluster 11: meiosis
observed gene count: 10
expected gene count: 3.32101701115786
uncorrected p-value: 0.00139146251427272
GO ID	term	observed gene count	expected gene count	uncorrected p-value
GO:0016321	female meiosis chromosome segregation	4	0.846534	0.00789291
GO:0007127	meiosis I	1	0.130236	0.126007
GO:0007143	female meiosis	2	0.716298	0.157777
GO:0007126	meiosis	2	0.846534	0.205854
GO:0007059	chromosome segregation	2	1.04189	0.280027
Cluster 12: chromosome segregation
observed gene count: 7
expected gene count: 1.88842143771721
uncorrected p-value: 0.00209071291037457
GO ID	term	observed gene count	expected gene count	uncorrected p-value
GO:0000070	mitotic sister chromatid segregation	5	0.716298	0.000379157
GO:0000819	sister chromatid segregation	1	0.260472	0.236175
GO:0007059	chromosome segregation	2	1.04189	0.280027
Cluster 13: protein deneddylation
observed gene count: 5
expected gene count: 1.10700567038595
uncorrected p-value: 0.00366637412808275
GO ID	term	observed gene count	expected gene count	uncorrected p-value
GO:0050821	protein stabilization	4	0.781416	0.00575576
GO:0000338	protein deneddylation	1	0.195354	0.18294
GO:0031647	regulation of protein stability	1	0.260472	0.236175
Cluster 14: neuron development
observed gene count: 22
expected gene count: 12.9584781415767
uncorrected p-value: 0.00961993043399035
GO ID	term	observed gene count	expected gene count	uncorrected p-value
GO:0048813	dendrite morphogenesis	10	4.42802	0.0118256
GO:0007517	muscle organ development	6	2.08378	0.0156251
GO:0048812	neuron projection morphogenesis	9	5.01408	0.0610783
GO:0048666	neuron development	3	1.23724	0.122458
GO:0000902	cell morphogenesis	3	2.21401	0.383039
Cluster 15: mRNA processing
observed gene count: 6
expected gene count: 1.95353941832815
uncorrected p-value: 0.0114230905334996
GO ID	term	observed gene count	expected gene count	uncorrected p-value
GO:0006378	mRNA polyadenylation	5	0.97677	0.00198265
GO:0006397	mRNA processing	1	0.911652	0.610873
Cluster 16: gene silencing
observed gene count: 29
expected gene count: 19.2098042802268
uncorrected p-value: 0.0157899999439865
GO ID	term	observed gene count	expected gene count	uncorrected p-value
GO:0016573	histone acetylation	3	0.455826	0.00786857
GO:0010629	negative regulation of gene expression	4	1.4326	0.0508874
GO:0045892	negative regulation of transcription, DNA-dependent	4	2.01866	0.139528
GO:0006357	regulation of transcription from RNA polymerase II promoter	6	4.10243	0.225179
GO:0016458	gene silencing	1	0.260472	0.236175
GO:0006355	regulation of transcription, DNA-dependent	13	10.8096	0.28409
GO:0006342	chromatin silencing	2	1.17212	0.329361
GO:0000122	negative regulation of transcription from RNA polymerase II promoter	5	3.9722	0.365364
Cluster 17: cell proliferation
observed gene count: 19
expected gene count: 11.3305286263033
uncorrected p-value: 0.0175310726044401
GO ID	term	observed gene count	expected gene count	uncorrected p-value
GO:0008283	cell proliferation	9	3.12566	0.00330233
GO:0007052	mitotic spindle organization	17	8.40022	0.0039276
GO:0000022	mitotic spindle elongation	7	4.29779	0.135737
Cluster 18: mRNA cleavage
observed gene count: 19
expected gene count: 11.591000548747
uncorrected p-value: 0.0217868492531864
GO ID	term	observed gene count	expected gene count	uncorrected p-value
GO:0006379	mRNA cleavage	6	0.911652	0.000140287
GO:0000245	spliceosome assembly	2	0.32559	0.037074
GO:0022618	ribonucleoprotein complex assembly	1	0.130236	0.126007
GO:0006397	mRNA processing	1	0.911652	0.610873
GO:0006396	RNA processing	1	0.911652	0.610873
GO:0000398	nuclear mRNA splicing, via spliceosome	8	8.85605	0.669364
Cluster 19: regulation of establishment of protein localization
observed gene count: 4
expected gene count: 1.36747759282971
uncorrected p-value: 0.0438031971075634
GO ID	term	observed gene count	expected gene count	uncorrected p-value
GO:0051533	positive regulation of NFAT protein import into nucleus	3	0.586062	0.0171249
GO:0070201	regulation of establishment of protein localization	1	0.195354	0.18294
Cluster 20: regulation of DNA replication
observed gene count: 2
expected gene count: 0.39070788366563
uncorrected p-value: 0.0532496024131294
GO ID	term	observed gene count	expected gene count	uncorrected p-value
GO:0006275	regulation of DNA replication	1	0.195354	0.18294
GO:0008156	negative regulation of DNA replication	1	0.195354	0.18294
Cluster 21: germ cell development
observed gene count: 11
expected gene count: 6.64203402231571
uncorrected p-value: 0.0664580911996946
GO ID	term	observed gene count	expected gene count	uncorrected p-value
GO:0007444	imaginal disc development	3	0.846534	0.0480483
GO:0007281	germ cell development	2	0.911652	0.230448
GO:0007447	imaginal disc pattern formation	1	0.32559	0.28595
GO:0035220	wing disc development	4	2.73496	0.291237
GO:0009953	dorsal/ventral pattern formation	1	0.716298	0.523547
GO:0008356	asymmetric cell division	1	0.781416	0.554635
Cluster 22: oogenesis
observed gene count: 16
expected gene count: 11.1351746844705
uncorrected p-value: 0.0893122284443519
GO ID	term	observed gene count	expected gene count	uncorrected p-value
GO:0007307	eggshell chorion gene amplification	5	0.716298	0.000379157
GO:0048477	oogenesis	11	6.77227	0.0742546
GO:0006277	DNA amplification	1	0.130236	0.126007
GO:0007304	chorion-containing eggshell formation	1	0.32559	0.28595
GO:0030707	ovarian follicle cell development	1	1.49771	0.788163
GO:0032504	multicellular organism reproduction	1	2.60472	0.933022
Cluster 23: histone exchange
observed gene count: 6
expected gene count: 3.25589903054692
uncorrected p-value: 0.103923852728422
GO ID	term	observed gene count	expected gene count	uncorrected p-value
GO:0016573	histone acetylation	3	0.455826	0.00786857
GO:0043486	histone exchange	1	0.130236	0.126007
GO:0006325	chromatin organization	2	0.781416	0.181577
GO:0006338	chromatin remodeling	1	0.911652	0.610873
Cluster 24: syncytial blastoderm mitotic cell cycle
observed gene count: 2
expected gene count: 0.586061825498445
uncorrected p-value: 0.112373018380154
GO ID	term	observed gene count	expected gene count	uncorrected p-value
GO:0035186	syncytial blastoderm mitotic cell cycle	2	0.390708	0.0532496
Cluster 25: positive regulation of gene expression
observed gene count: 10
expected gene count: 7.09785988659228
uncorrected p-value: 0.170692313375808
GO ID	term	observed gene count	expected gene count	uncorrected p-value
GO:0010628	positive regulation of gene expression	3	0.586062	0.0171249
GO:0045893	positive regulation of transcription, DNA-dependent	5	2.21401	0.0667894
GO:0045944	positive regulation of transcription from RNA polymerase II promoter	4	5.14432	0.766205
Cluster 26: cell motion
observed gene count: 9
expected gene count: 6.38156209987196
uncorrected p-value: 0.186350388706835
GO ID	term	observed gene count	expected gene count	uncorrected p-value
GO:0006928	cell motion	1	0.065118	0.065118
GO:0001700	embryonic development via the syncytial blastoderm	4	1.62795	0.0756348
GO:0009792	embryonic development ending in birth or egg hatching	1	0.260472	0.236175
GO:0001738	morphogenesis of a polarized epithelium	1	0.586062	0.45473
GO:0007391	dorsal closure	3	3.19078	0.627671
Cluster 27: histone demethylation
observed gene count: 2
expected gene count: 0.911651728553137
uncorrected p-value: 0.230448344557901
GO ID	term	observed gene count	expected gene count	uncorrected p-value
GO:0016577	histone demethylation	2	0.195354	0.0121397
Cluster 28: rRNA processing
observed gene count: 5
expected gene count: 3.38613499176879
uncorrected p-value: 0.248650886308752
GO ID	term	observed gene count	expected gene count	uncorrected p-value
GO:0006364	rRNA processing	3	1.69307	0.237818
GO:0042254	ribosome biogenesis	3	1.75819	0.25568
Cluster 29: methylation
observed gene count: 3
expected gene count: 1.75818547649534
uncorrected p-value: 0.255679641027956
GO ID	term	observed gene count	expected gene count	uncorrected p-value
GO:0032259	methylation	2	0.455826	0.071402
GO:0016571	histone methylation	1	0.520944	0.41669
Cluster 30: nucleus localization
observed gene count: 1
expected gene count: 0.325589903054692
uncorrected p-value: 0.285949921068836
GO ID	term	observed gene count	expected gene count	uncorrected p-value
GO:0051647	nucleus localization	1	0.130236	0.126007
Cluster 31: protein amino acid lipidation
observed gene count: 1
expected gene count: 0.325589903054692
uncorrected p-value: 0.285949921068836
GO ID	term	observed gene count	expected gene count	uncorrected p-value
GO:0006497	protein amino acid lipidation	1	0.260472	0.236175
Cluster 32: cell adhesion
observed gene count: 7
expected gene count: 5.73038229376258
uncorrected p-value: 0.34849025402834
GO ID	term	observed gene count	expected gene count	uncorrected p-value
GO:0022604	regulation of cell morphogenesis	1	0.065118	0.065118
GO:0008360	regulation of cell shape	5	3.45125	0.261205
GO:0007155	cell adhesion	5	3.77684	0.325787
Cluster 33: positive regulation of mitotic cell cycle
observed gene count: 1
expected gene count: 0.455825864276569
uncorrected p-value: 0.376004646109483
GO ID	term	observed gene count	expected gene count	uncorrected p-value
GO:0045931	positive regulation of mitotic cell cycle	1	0.195354	0.18294
Cluster 34: regulation of nuclear mRNA splicing, via spliceosome
observed gene count: 1
expected gene count: 0.455825864276569
uncorrected p-value: 0.376004646109483
GO ID	term	observed gene count	expected gene count	uncorrected p-value
GO:0048024	regulation of nuclear mRNA splicing, via spliceosome	1	0.260472	0.236175
Cluster 35: protein targeting
observed gene count: 12
expected gene count: 10.8095847814158
uncorrected p-value: 0.396693911722476
GO ID	term	observed gene count	expected gene count	uncorrected p-value
GO:0006913	nucleocytoplasmic transport	4	0.455826	0.000528692
GO:0006606	protein import into nucleus	4	1.04189	0.0172043
GO:0034613	cellular protein localization	1	0.065118	0.065118
GO:0008104	protein localization	4	1.88842	0.116283
GO:0006605	protein targeting	1	0.32559	0.28595
GO:0006886	intracellular protein transport	2	4.03731	0.919387
Cluster 36: protein amino acid phosphorylation
observed gene count: 15
expected gene count: 15.1073715017377
uncorrected p-value: 0.551502278908063
GO ID	term	observed gene count	expected gene count	uncorrected p-value
GO:0006470	protein amino acid dephosphorylation	6	3.51637	0.13676
GO:0006468	protein amino acid phosphorylation	9	9.57234	0.6261
Cluster 37: actin filament organization
observed gene count: 4
expected gene count: 3.9070788366563
uncorrected p-value: 0.555247223532437
GO ID	term	observed gene count	expected gene count	uncorrected p-value
GO:0030029	actin filament-based process	1	0.260472	0.236175
GO:0007015	actin filament organization	4	2.60472	0.261605
GO:0030036	actin cytoskeleton organization	1	1.75819	0.838384
Cluster 38: nucleosome assembly
observed gene count: 4
expected gene count: 3.97219681726724
uncorrected p-value: 0.568572385800223
GO ID	term	observed gene count	expected gene count	uncorrected p-value
GO:0065004	protein-DNA complex assembly	1	0.130236	0.126007
GO:0006334	nucleosome assembly	3	3.64661	0.716458
GO:0006333	chromatin assembly or disassembly	2	3.38613	0.861893
Cluster 39: germ cell development
observed gene count: 3
expected gene count: 2.93030912749223
uncorrected p-value: 0.569056765831694
GO ID	term	observed gene count	expected gene count	uncorrected p-value
GO:0007281	germ cell development	2	0.911652	0.230448
GO:0007309	oocyte axis specification	1	0.586062	0.45473
Cluster 40: phagocytosis, engulfment
observed gene count: 14
expected gene count: 14.4561916956283
uncorrected p-value: 0.591096487028002
GO ID	term	observed gene count	expected gene count	uncorrected p-value
GO:0006911	phagocytosis, engulfment	14	8.13975	0.0317009
Cluster 41: regulation of synapse organization
observed gene count: 6
expected gene count: 6.25132613865008
uncorrected p-value: 0.601955356156633
GO ID	term	observed gene count	expected gene count	uncorrected p-value
GO:0045886	negative regulation of synaptic growth at neuromuscular junction	4	0.911652	0.0104919
GO:0050807	regulation of synapse organization	1	0.455826	0.376005
GO:0008582	regulation of synaptic growth at neuromuscular junction	1	1.10701	0.682231
Cluster 42: apoptosis
observed gene count: 1
expected gene count: 1.23724163160783
uncorrected p-value: 0.722392665741043
GO ID	term	observed gene count	expected gene count	uncorrected p-value
GO:0006915	apoptosis	1	0.911652	0.610873
Cluster 43: axonogenesis
observed gene count: 6
expected gene count: 9.89793305286263
uncorrected p-value: 0.937924573336574
GO ID	term	observed gene count	expected gene count	uncorrected p-value
GO:0007423	sensory organ development	2	1.69307	0.512352
GO:0001751	compound eye photoreceptor cell differentiation	1	0.781416	0.554635
GO:0001745	compound eye morphogenesis	3	3.12566	0.613544
GO:0007409	axonogenesis	1	1.95354	0.868087
GO:0048749	compound eye development	1	3.64661	0.977416
Cluster 44: translation
observed gene count: 2
expected gene count: 11.3956466069142
uncorrected p-value: 0.999914799803041
GO ID	term	observed gene count	expected gene count	uncorrected p-value
GO:0006412	translation	2	11.3305	0.999909

## Sheet: WEE_50-120-FEmbryo2-4h
sample name: WEE_50-120-FEmbryo2-4h
number of associated genes in the sample: 254
Cluster 1: RNA splicing
observed gene count: 33
expected gene count: 7.43369306749588
uncorrected p-value: 1.33763117485349e-13
GO ID	term	observed gene count	expected gene count	uncorrected p-value
GO:0000398	nuclear mRNA splicing, via spliceosome	31	6.31864	4.36129e-14
GO:0008380	RNA splicing	2	0.371685	0.0500185
GO:0006397	mRNA processing	1	0.650448	0.48668
GO:0006396	RNA processing	1	0.650448	0.48668
Cluster 2: gene silencing
observed gene count: 15
expected gene count: 2.46241082860801
uncorrected p-value: 8.60984858391564e-09
GO ID	term	observed gene count	expected gene count	uncorrected p-value
GO:0035195	gene silencing by miRNA	6	0.371685	2.45782e-07
GO:0000184	nuclear-transcribed mRNA catabolic process, nonsense-mediated decay	3	0.232303	0.000924544
GO:0031053	primary microRNA processing	2	0.0929212	0.00215048
GO:0016458	gene silencing	2	0.185842	0.0121233
GO:0010629	negative regulation of gene expression	4	1.02213	0.0171778
GO:0035194	posttranscriptional gene silencing by RNA	1	0.0464606	0.0464606
GO:0006401	RNA catabolic process	1	0.0929212	0.0907707
GO:0016246	RNA interference	2	0.557527	0.104446
GO:0000956	nuclear-transcribed mRNA catabolic process	1	0.139382	0.133029
Cluster 3: regulation of nuclear mRNA splicing, via spliceosome
observed gene count: 11
expected gene count: 1.95134443021767
uncorrected p-value: 2.08221027808422e-06
GO ID	term	observed gene count	expected gene count	uncorrected p-value
GO:0000381	regulation of alternative nuclear mRNA splicing, via spliceosome	10	1.71904	4.50016e-06
GO:0048024	regulation of nuclear mRNA splicing, via spliceosome	3	0.185842	0.000382983
Cluster 4: protein deneddylation
observed gene count: 7
expected gene count: 0.789829888421438
uncorrected p-value: 5.60950351722012e-06
GO ID	term	observed gene count	expected gene count	uncorrected p-value
GO:0050821	protein stabilization	5	0.557527	0.000125996
GO:0031647	regulation of protein stability	2	0.185842	0.0121233
GO:0000338	protein deneddylation	1	0.139382	0.133029
Cluster 5: negative regulation of gene expression
observed gene count: 25
expected gene count: 10.6859337845253
uncorrected p-value: 5.26272834380697e-05
GO ID	term	observed gene count	expected gene count	uncorrected p-value
GO:0045892	negative regulation of transcription, DNA-dependent	7	1.44028	0.0004331
GO:0006355	regulation of transcription, DNA-dependent	16	7.71246	0.00418212
GO:0010629	negative regulation of gene expression	4	1.02213	0.0171778
GO:0000122	negative regulation of transcription from RNA polymerase II promoter	6	2.8341	0.0624327
Cluster 6: mRNA cleavage
observed gene count: 7
expected gene count: 1.06859337845253
uncorrected p-value: 5.55845769995676e-05
GO ID	term	observed gene count	expected gene count	uncorrected p-value
GO:0006398	histone mRNA 3'-end processing	3	0.232303	0.000924544
GO:0006379	mRNA cleavage	4	0.650448	0.00314815
GO:0006378	mRNA polyadenylation	4	0.696909	0.00413812
GO:0008334	histone mRNA metabolic process	1	0.0464606	0.0464606
Cluster 7: regulation of mitosis
observed gene count: 12
expected gene count: 3.25224071702945
uncorrected p-value: 7.46277283171603e-05
GO ID	term	observed gene count	expected gene count	uncorrected p-value
GO:0051726	regulation of cell cycle	7	1.99781	0.00329629
GO:0007346	regulation of mitotic cell cycle	3	0.650448	0.0246554
GO:0030071	regulation of mitotic metaphase/anaphase transition	1	0.185842	0.173332
GO:0007088	regulation of mitosis	1	0.464606	0.378828
Cluster 8: transcription initiation
observed gene count: 14
expected gene count: 4.36729467715383
uncorrected p-value: 9.43739245369283e-05
GO ID	term	observed gene count	expected gene count	uncorrected p-value
GO:0006367	transcription initiation from RNA polymerase II promoter	7	2.23011	0.0061833
GO:0006366	transcription from RNA polymerase II promoter	5	1.62612	0.0215656
GO:0006351	transcription, DNA-dependent	4	1.34736	0.0433387
GO:0006352	transcription initiation	1	0.278763	0.248422
Cluster 9: cell cycle
observed gene count: 24
expected gene count: 11.2899213462594
uncorrected p-value: 0.000331143246823381
GO ID	term	observed gene count	expected gene count	uncorrected p-value
GO:0007049	cell cycle	8	1.39382	4.66594e-05
GO:0007052	mitotic spindle organization	15	5.99342	0.000856773
GO:0007017	microtubule-based process	2	1.25444	0.359276
GO:0000226	microtubule cytoskeleton organization	1	0.929212	0.61449
GO:0000278	mitotic cell cycle	1	1.02213	0.649608
Cluster 10: regulation of transcription, DNA-dependent
observed gene count: 21
expected gene count: 10.1284068044631
uncorrected p-value: 0.00108528412973106
GO ID	term	observed gene count	expected gene count	uncorrected p-value
GO:0006355	regulation of transcription, DNA-dependent	16	7.71246	0.00418212
GO:0006357	regulation of transcription from RNA polymerase II promoter	7	2.92702	0.0258296
Cluster 11: positive regulation of gene expression
observed gene count: 13
expected gene count: 5.06420340223157
uncorrected p-value: 0.00148881486870954
GO ID	term	observed gene count	expected gene count	uncorrected p-value
GO:0010628	positive regulation of gene expression	4	0.418145	0.000476573
GO:0045893	positive regulation of transcription, DNA-dependent	6	1.57966	0.00425331
GO:0045944	positive regulation of transcription from RNA polymerase II promoter	6	3.67039	0.159736
Cluster 12: histone exchange
observed gene count: 8
expected gene count: 2.32302908359246
uncorrected p-value: 0.00191072585501808
GO ID	term	observed gene count	expected gene count	uncorrected p-value
GO:0043044	ATP-dependent chromatin remodeling	2	0.185842	0.0121233
GO:0006338	chromatin remodeling	3	0.650448	0.0246554
GO:0016573	histone acetylation	2	0.325224	0.0386799
GO:0034728	nucleosome organization	1	0.0464606	0.0464606
GO:0043486	histone exchange	1	0.0929212	0.0907707
GO:0006325	chromatin organization	2	0.557527	0.104446
GO:0051276	chromosome organization	1	0.511066	0.407741
Cluster 13: mitosis
observed gene count: 10
expected gene count: 3.80976769709164
uncorrected p-value: 0.00437383628762636
GO ID	term	observed gene count	expected gene count	uncorrected p-value
GO:0007067	mitosis	9	2.60179	0.000973097
GO:0000087	M phase of mitotic cell cycle	1	0.139382	0.133029
GO:0000278	mitotic cell cycle	1	1.02213	0.649608
Cluster 14: centrosome cycle
observed gene count: 8
expected gene count: 2.97347722699835
uncorrected p-value: 0.00900496707837732
GO ID	term	observed gene count	expected gene count	uncorrected p-value
GO:0051297	centrosome organization	4	1.34736	0.0433387
GO:0051298	centrosome duplication	5	2.13719	0.060521
GO:0007098	centrosome cycle	1	0.278763	0.248422
Cluster 15: chromosome segregation
observed gene count: 5
expected gene count: 1.34735686848363
uncorrected p-value: 0.00988403245979591
GO ID	term	observed gene count	expected gene count	uncorrected p-value
GO:0000070	mitotic sister chromatid segregation	3	0.511066	0.0123881
GO:0000819	sister chromatid segregation	1	0.185842	0.173332
GO:0007059	chromosome segregation	1	0.743369	0.533391
Cluster 16: neuron development
observed gene count: 20
expected gene count: 12.1262118163527
uncorrected p-value: 0.018041816797652
GO ID	term	observed gene count	expected gene count	uncorrected p-value
GO:0045892	negative regulation of transcription, DNA-dependent	7	1.44028	0.0004331
GO:0007517	muscle organ development	6	1.48674	0.00309753
GO:0048813	dendrite morphogenesis	7	3.15932	0.0372764
GO:0000122	negative regulation of transcription from RNA polymerase II promoter	6	2.8341	0.0624327
GO:0048812	neuron projection morphogenesis	7	3.57746	0.0653595
GO:0048666	neuron development	2	0.882751	0.219997
GO:0000902	cell morphogenesis	1	1.57966	0.802606
Cluster 17: oogenesis
observed gene count: 16
expected gene count: 9.5244192427291
uncorrected p-value: 0.0280971580527639
GO ID	term	observed gene count	expected gene count	uncorrected p-value
GO:0007307	eggshell chorion gene amplification	4	0.511066	0.00115916
GO:0006261	DNA-dependent DNA replication	3	0.557527	0.0159589
GO:0006260	DNA replication	5	1.5332	0.0169936
GO:0048477	oogenesis	8	4.8319	0.109312
GO:0007304	chorion-containing eggshell formation	1	0.232303	0.211767
GO:0030707	ovarian follicle cell development	1	1.06859	0.665953
GO:0032504	multicellular organism reproduction	1	1.85842	0.851915
Cluster 18: meiosis
observed gene count: 6
expected gene count: 2.41595024693616
uncorrected p-value: 0.0322042378389339
GO ID	term	observed gene count	expected gene count	uncorrected p-value
GO:0007140	male meiosis	4	0.696909	0.00413812
GO:0007143	female meiosis	1	0.511066	0.407741
GO:0007126	meiosis	1	0.603988	0.461606
GO:0007059	chromosome segregation	1	0.743369	0.533391
Cluster 19: nucleosome assembly
observed gene count: 7
expected gene count: 3.2987012987013
uncorrected p-value: 0.0455357978026354
GO ID	term	observed gene count	expected gene count	uncorrected p-value
GO:0034728	nucleosome organization	1	0.0464606	0.0464606
GO:0065004	protein-DNA complex assembly	1	0.0929212	0.0907707
GO:0006325	chromatin organization	2	0.557527	0.104446
GO:0006334	nucleosome assembly	5	2.60179	0.117011
GO:0006333	chromatin assembly or disassembly	2	2.41595	0.703698
Cluster 20: endocytosis
observed gene count: 15
expected gene count: 10.3142491311505
uncorrected p-value: 0.0912579257311956
GO ID	term	observed gene count	expected gene count	uncorrected p-value
GO:0006911	phagocytosis, engulfment	15	5.80757	0.000613535
GO:0006897	endocytosis	1	1.39382	0.760961
Cluster 21: DNA repair
observed gene count: 7
expected gene count: 4.64605816718493
uncorrected p-value: 0.181962825591634
GO ID	term	observed gene count	expected gene count	uncorrected p-value
GO:0006281	DNA repair	3	1.71904	0.24566
GO:0006974	response to DNA damage stimulus	4	3.20578	0.400058
Cluster 22: protein amino acid N-linked glycosylation
observed gene count: 3
expected gene count: 1.53319919517103
uncorrected p-value: 0.196219070088759
GO ID	term	observed gene count	expected gene count	uncorrected p-value
GO:0018279	protein amino acid N-linked glycosylation via asparagine	2	0.139382	0.00625312
GO:0006487	protein amino acid N-linked glycosylation	2	0.418145	0.0623788
Cluster 23: wing disc development
observed gene count: 5
expected gene count: 3.34516188037315
uncorrected p-value: 0.241865880551403
GO ID	term	observed gene count	expected gene count	uncorrected p-value
GO:0007444	imaginal disc development	2	0.603988	0.119792
GO:0035220	wing disc development	3	1.95134	0.309684
Cluster 24: spliceosome assembly
observed gene count: 1
expected gene count: 0.325224071702945
uncorrected p-value: 0.283379532356617
GO ID	term	observed gene count	expected gene count	uncorrected p-value
GO:0000245	spliceosome assembly	1	0.232303	0.211767
Cluster 25: mRNA transport
observed gene count: 17
expected gene count: 14.5886226449607
uncorrected p-value: 0.289658370162863
GO ID	term	observed gene count	expected gene count	uncorrected p-value
GO:0006913	nucleocytoplasmic transport	4	0.325224	0.000142579
GO:0006406	mRNA export from nucleus	5	0.650448	0.000294926
GO:0006606	protein import into nucleus	3	0.743369	0.0354306
GO:0034613	cellular protein localization	1	0.0464606	0.0464606
GO:0051168	nuclear export	1	0.185842	0.173332
GO:0051028	mRNA transport	1	0.232303	0.211767
GO:0006605	protein targeting	1	0.232303	0.211767
GO:0008104	protein localization	2	1.34736	0.393021
GO:0006886	intracellular protein transport	2	2.88056	0.791171
GO:0015031	protein transport	1	2.23011	0.899107
GO:0055085	transmembrane transport	1	6.03988	0.99809
Cluster 26: response to heat
observed gene count: 3
expected gene count: 1.99780501188952
uncorrected p-value: 0.322609403061474
GO ID	term	observed gene count	expected gene count	uncorrected p-value
GO:0009408	response to heat	3	1.90488	0.296778
Cluster 27: determination of adult life span
observed gene count: 5
expected gene count: 3.85622827876349
uncorrected p-value: 0.342092086332071
GO ID	term	observed gene count	expected gene count	uncorrected p-value
GO:0008340	determination of adult life span	5	3.80977	0.332766
Cluster 28: proteolysis
observed gene count: 10
expected gene count: 9.3385769160417
uncorrected p-value: 0.458878578243661
GO ID	term	observed gene count	expected gene count	uncorrected p-value
GO:0006511	ubiquitin-dependent protein catabolic process	6	2.50887	0.0378588
GO:0051603	proteolysis involved in cellular protein catabolic process	2	0.325224	0.0386799
GO:0006508	proteolysis	5	7.15493	0.8508
Cluster 29: dephosphorylation
observed gene count: 8
expected gene count: 8.40936528260472
uncorrected p-value: 0.610096057453517
GO ID	term	observed gene count	expected gene count	uncorrected p-value
GO:0016311	dephosphorylation	1	0.696909	0.51059
GO:0006468	protein amino acid phosphorylation	7	6.82971	0.529301
Cluster 30: histone methylation
observed gene count: 1
expected gene count: 1.25443570513993
uncorrected p-value: 0.724081719992914
GO ID	term	observed gene count	expected gene count	uncorrected p-value
GO:0016571	histone methylation	1	0.371685	0.316717
Cluster 31: eye development
observed gene count: 5
expected gene count: 6.1327967806841
uncorrected p-value: 0.742118008756222
GO ID	term	observed gene count	expected gene count	uncorrected p-value
GO:0001654	eye development	1	0.325224	0.28338
GO:0001751	compound eye photoreceptor cell differentiation	1	0.557527	0.435313
GO:0007423	sensory organ development	1	1.20798	0.71057
GO:0048749	compound eye development	2	2.60179	0.741846
GO:0001745	compound eye morphogenesis	1	2.23011	0.899107
Cluster 32: segmentation
observed gene count: 2
expected gene count: 2.69471373696726
uncorrected p-value: 0.759300333939926
GO ID	term	observed gene count	expected gene count	uncorrected p-value
GO:0035282	segmentation	1	0.185842	0.173332
GO:0008595	determination of anterior/posterior axis, embryo	2	0.882751	0.219997
GO:0009952	anterior/posterior pattern formation	1	0.325224	0.28338

## Sheet: WEE_50-150-FEmbryo2-4h
sample name: WEE_50-150-FEmbryo2-4h
number of associated genes in the sample: 391
Cluster 1: RNA splicing
observed gene count: 48
expected gene count: 11.4432046826413
uncorrected p-value: 8.68992009586834e-19
GO ID	term	observed gene count	expected gene count	uncorrected p-value
GO:0000398	nuclear mRNA splicing, via spliceosome	44	9.72672	1.05474e-18
GO:0008380	RNA splicing	4	0.57216	0.00143095
GO:0006397	mRNA processing	4	1.00128	0.0145021
GO:0000375	RNA splicing, via transesterification reactions	1	0.07152	0.07152
GO:0006396	RNA processing	3	1.00128	0.0732604
Cluster 2: spliceosome assembly
observed gene count: 23
expected gene count: 7.22352295591732
uncorrected p-value: 4.18110866708301e-07
GO ID	term	observed gene count	expected gene count	uncorrected p-value
GO:0006367	transcription initiation from RNA polymerase II promoter	13	3.43296	2.01534e-05
GO:0006366	transcription from RNA polymerase II promoter	8	2.5032	0.00269543
GO:0000245	spliceosome assembly	2	0.3576	0.0441446
GO:0022618	ribonucleoprotein complex assembly	1	0.14304	0.137937
GO:0006352	transcription initiation	1	0.42912	0.359464
GO:0006351	transcription, DNA-dependent	2	2.07408	0.624776
Cluster 3: protein stabilization
observed gene count: 5
expected gene count: 1.14432046826413
uncorrected p-value: 0.00411763802957686
GO ID	term	observed gene count	expected gene count	uncorrected p-value
GO:0031647	regulation of protein stability	2	0.28608	0.0277893
GO:0050821	protein stabilization	3	0.85824	0.0491994
Cluster 4: regulation of transcription, DNA-dependent
observed gene count: 24
expected gene count: 15.5913663800988
uncorrected p-value: 0.0215767630795971
GO ID	term	observed gene count	expected gene count	uncorrected p-value
GO:0006357	regulation of transcription from RNA polymerase II promoter	11	4.50576	0.00453499
GO:0006355	regulation of transcription, DNA-dependent	14	11.8723	0.298556
Cluster 5: mitosis
observed gene count: 9
expected gene count: 4.4342418145235
uncorrected p-value: 0.0307996320000031
GO ID	term	observed gene count	expected gene count	uncorrected p-value
GO:0007067	mitosis	9	4.00512	0.0167493
Cluster 6: rRNA processing
observed gene count: 9
expected gene count: 4.50576184379001
uncorrected p-value: 0.0337591295989976
GO ID	term	observed gene count	expected gene count	uncorrected p-value
GO:0006364	rRNA processing	4	1.85952	0.110732
GO:0016072	rRNA metabolic process	1	0.14304	0.137937
GO:0008033	tRNA processing	2	0.85824	0.210044
GO:0042254	ribosome biogenesis	3	1.93104	0.303734
Cluster 7: histone acetylation
observed gene count: 3
expected gene count: 0.858240351198098
uncorrected p-value: 0.0491993703047215
GO ID	term	observed gene count	expected gene count	uncorrected p-value
GO:0016573	histone acetylation	3	0.50064	0.0102261
Cluster 8: nuclear export
observed gene count: 6
expected gene count: 3.07536125845985
uncorrected p-value: 0.0832673763879255
GO ID	term	observed gene count	expected gene count	uncorrected p-value
GO:0006406	mRNA export from nucleus	4	1.00128	0.0145021
GO:0051168	nuclear export	1	0.28608	0.256889
GO:0006913	nucleocytoplasmic transport	1	0.50064	0.405326
Cluster 9: regulation of cell cycle
observed gene count: 7
expected gene count: 4.07664166819096
uncorrected p-value: 0.109876092061437
GO ID	term	observed gene count	expected gene count	uncorrected p-value
GO:0051726	regulation of cell cycle	6	3.07536	0.0832674
GO:0007346	regulation of mitotic cell cycle	1	1.00128	0.646607
Cluster 10: negative regulation of gene expression
observed gene count: 10
expected gene count: 7.0089628681178
uncorrected p-value: 0.160861209688166
GO ID	term	observed gene count	expected gene count	uncorrected p-value
GO:0045892	negative regulation of transcription, DNA-dependent	5	2.21712	0.0664958
GO:0000122	negative regulation of transcription from RNA polymerase II promoter	7	4.36272	0.143044
GO:0010629	negative regulation of gene expression	2	1.57344	0.473725
Cluster 11: protein ubiquitination
observed gene count: 3
expected gene count: 1.43040058533016
uncorrected p-value: 0.168186358454908
GO ID	term	observed gene count	expected gene count	uncorrected p-value
GO:0016567	protein ubiquitination	3	1.4304	0.168186
Cluster 12: positive regulation of transcription, DNA-dependent
observed gene count: 5
expected gene count: 3.00384122919334
uncorrected p-value: 0.17826854031519
GO ID	term	observed gene count	expected gene count	uncorrected p-value
GO:0045893	positive regulation of transcription, DNA-dependent	5	2.43168	0.091675
Cluster 13: cell cycle
observed gene count: 21
expected gene count: 17.3793671117615
uncorrected p-value: 0.209709747659114
GO ID	term	observed gene count	expected gene count	uncorrected p-value
GO:0007049	cell cycle	5	2.1456	0.0590817
GO:0007052	mitotic spindle organization	11	9.22608	0.316253
GO:0000226	microtubule cytoskeleton organization	2	1.4304	0.424286
GO:0007051	spindle organization	1	0.7152	0.524172
GO:0000278	mitotic cell cycle	1	1.57344	0.805205
GO:0007010	cytoskeleton organization	1	1.85952	0.855426
GO:0007017	microtubule-based process	1	1.93104	0.865815
Cluster 14: chromatin silencing
observed gene count: 5
expected gene count: 3.43296140479239
uncorrected p-value: 0.25731519225518
GO ID	term	observed gene count	expected gene count	uncorrected p-value
GO:0040029	regulation of gene expression, epigenetic	1	0.14304	0.137937
GO:0006342	chromatin silencing	2	1.28736	0.372548
GO:0010629	negative regulation of gene expression	2	1.57344	0.473725
Cluster 15: regulation of nuclear mRNA splicing, via spliceosome
observed gene count: 4
expected gene count: 3.00384122919334
uncorrected p-value: 0.353496785353068
GO ID	term	observed gene count	expected gene count	uncorrected p-value
GO:0048024	regulation of nuclear mRNA splicing, via spliceosome	1	0.28608	0.256889
GO:0000381	regulation of alternative nuclear mRNA splicing, via spliceosome	4	2.64624	0.270723
Cluster 16: apoptosis
observed gene count: 2
expected gene count: 1.35888055606365
uncorrected p-value: 0.398675765741503
GO ID	term	observed gene count	expected gene count	uncorrected p-value
GO:0006915	apoptosis	2	1.00128	0.264527
Cluster 17: positive regulation of mitotic cell cycle
observed gene count: 1
expected gene count: 0.500640204865557
uncorrected p-value: 0.405325701539314
GO ID	term	observed gene count	expected gene count	uncorrected p-value
GO:0045931	positive regulation of mitotic cell cycle	1	0.21456	0.199614
Cluster 18: imaginal disc development
observed gene count: 3
expected gene count: 2.36016096579477
uncorrected p-value: 0.423558828501905
GO ID	term	observed gene count	expected gene count	uncorrected p-value
GO:0007450	dorsal/ventral pattern formation, imaginal disc	2	0.3576	0.0441446
GO:0007444	imaginal disc development	1	0.92976	0.619316
Cluster 19: methylation
observed gene count: 4
expected gene count: 4.00512163892446
uncorrected p-value: 0.575803331213245
GO ID	term	observed gene count	expected gene count	uncorrected p-value
GO:0034968	histone lysine methylation	1	0.07152	0.07152
GO:0016571	histone methylation	2	0.57216	0.107226
GO:0032259	methylation	1	0.50064	0.405326
Cluster 20: dendrite morphogenesis
observed gene count: 17
expected gene count: 17.450887141028
uncorrected p-value: 0.583145861220275
GO ID	term	observed gene count	expected gene count	uncorrected p-value
GO:0007517	muscle organ development	6	2.28864	0.0237924
GO:0000122	negative regulation of transcription from RNA polymerase II promoter	7	4.36272	0.143044
GO:0048813	dendrite morphogenesis	6	4.86336	0.358852
GO:0030182	neuron differentiation	1	0.50064	0.405326
GO:0048812	neuron projection morphogenesis	6	5.50704	0.476045
Cluster 21: salivary gland development
observed gene count: 2
expected gene count: 2.07408084872874
uncorrected p-value: 0.624776197901628
GO ID	term	observed gene count	expected gene count	uncorrected p-value
GO:0007431	salivary gland development	1	1.0728	0.671947
GO:0007435	salivary gland morphogenesis	1	1.4304	0.773908
Cluster 22: GPI anchor biosynthetic process
observed gene count: 2
expected gene count: 2.78928114139382
uncorrected p-value: 0.779437236020317
GO ID	term	observed gene count	expected gene count	uncorrected p-value
GO:0006506	GPI anchor biosynthetic process	2	1.00128	0.264527
Cluster 23: DNA replication
observed gene count: 2
expected gene count: 2.93232119992683
uncorrected p-value: 0.802690718549205
GO ID	term	observed gene count	expected gene count	uncorrected p-value
GO:0006260	DNA replication	2	2.36016	0.694883
Cluster 24: morphogenesis of an epithelium
observed gene count: 1
expected gene count: 1.57344064386318
uncorrected p-value: 0.805204693812759
GO ID	term	observed gene count	expected gene count	uncorrected p-value
GO:0002009	morphogenesis of an epithelium	1	0.85824	0.589922
Cluster 25: blastoderm segmentation
observed gene count: 2
expected gene count: 4.14816169745747
uncorrected p-value: 0.927149317337409
GO ID	term	observed gene count	expected gene count	uncorrected p-value
GO:0008595	determination of anterior/posterior axis, embryo	2	1.35888	0.398676
GO:0007350	blastoderm segmentation	1	0.92976	0.619316
Cluster 26: wing disc development
observed gene count: 2
expected gene count: 4.14816169745747
uncorrected p-value: 0.927149317337409
GO ID	term	observed gene count	expected gene count	uncorrected p-value
GO:0002165	instar larval or pupal development	1	0.42912	0.359464
GO:0035220	wing disc development	1	3.00384	0.956233
Cluster 27: DNA repair
observed gene count: 4
expected gene count: 7.29504298518383
uncorrected p-value: 0.940813853340059
GO ID	term	observed gene count	expected gene count	uncorrected p-value
GO:0006974	response to DNA damage stimulus	4	4.93488	0.737778
GO:0006281	DNA repair	1	2.64624	0.936395
Cluster 28: phosphorylation
observed gene count: 7
expected gene count: 11.8723248582404
uncorrected p-value: 0.958760983882821
GO ID	term	observed gene count	expected gene count	uncorrected p-value
GO:0016310	phosphorylation	1	1.35888	0.756427
GO:0006468	protein amino acid phosphorylation	6	10.5134	0.957742
Cluster 29: proteolysis
observed gene count: 8
expected gene count: 14.3755258825681
uncorrected p-value: 0.97979865002884
GO ID	term	observed gene count	expected gene count	uncorrected p-value
GO:0006511	ubiquitin-dependent protein catabolic process	4	3.86208	0.546429
GO:0006508	proteolysis	5	11.0141	0.988364
Cluster 30: oogenesis
observed gene count: 5
expected gene count: 11.0856045363088
uncorrected p-value: 0.988954476551867
GO ID	term	observed gene count	expected gene count	uncorrected p-value
GO:0007281	germ cell development	1	1.00128	0.646607
GO:0048477	oogenesis	4	7.43808	0.946421
Cluster 31: protein transport
observed gene count: 5
expected gene count: 11.8723248582404
uncorrected p-value: 0.993830490328453
GO ID	term	observed gene count	expected gene count	uncorrected p-value
GO:0006606	protein import into nucleus	2	1.14432	0.319043
GO:0006913	nucleocytoplasmic transport	1	0.50064	0.405326
GO:0008104	protein localization	1	2.07408	0.884413
GO:0015031	protein transport	1	3.43296	0.972066
Cluster 32: phagocytosis, engulfment
observed gene count: 6
expected gene count: 15.8774464971648
uncorrected p-value: 0.999050714424128
GO ID	term	observed gene count	expected gene count	uncorrected p-value
GO:0016192	vesicle-mediated transport	3	4.79184	0.867971
GO:0006911	phagocytosis, engulfment	3	8.94	0.99505

## Sheet: WEE_50-180-FEmbryo10-12h
sample name: WEE_50-180-FEmbryo10-12h
number of associated genes in the sample: 109
Cluster 1: spindle organization
observed gene count: 13
expected gene count: 4.94457655021035
uncorrected p-value: 0.00119685934466859
GO ID	term	observed gene count	expected gene count	uncorrected p-value
GO:0000022	mitotic spindle elongation	10	1.3159	5.43461e-07
GO:0007052	mitotic spindle organization	10	2.57198	0.000222015
GO:0007051	spindle organization	1	0.199378	0.182546
GO:0000226	microtubule cytoskeleton organization	1	0.398756	0.332018
Cluster 2: regulation of pole plasm oskar mRNA localization
observed gene count: 3
expected gene count: 0.358880556063655
uncorrected p-value: 0.00505838195294891
GO ID	term	observed gene count	expected gene count	uncorrected p-value
GO:0007317	regulation of pole plasm oskar mRNA localization	3	0.299067	0.00294587
Cluster 3: RNA splicing
observed gene count: 4
expected gene count: 0.717761112127309
uncorrected p-value: 0.00539003117406074
GO ID	term	observed gene count	expected gene count	uncorrected p-value
GO:0006397	mRNA processing	2	0.279129	0.0306607
GO:0008380	RNA splicing	1	0.159502	0.148894
GO:0006396	RNA processing	1	0.279129	0.245944
Cluster 4: phagocytosis, engulfment
observed gene count: 10
expected gene count: 4.42619352478507
uncorrected p-value: 0.0125888246724368
GO ID	term	observed gene count	expected gene count	uncorrected p-value
GO:0006911	phagocytosis, engulfment	7	2.49223	0.0119715
GO:0016192	vesicle-mediated transport	3	1.33583	0.148632
Cluster 5: transcription, DNA-dependent
observed gene count: 3
expected gene count: 1.21620632888239
uncorrected p-value: 0.121306004116439
GO ID	term	observed gene count	expected gene count	uncorrected p-value
GO:0006366	transcription from RNA polymerase II promoter	3	0.697823	0.031786
GO:0006351	transcription, DNA-dependent	1	0.578196	0.443203
Cluster 6: tRNA processing
observed gene count: 1
expected gene count: 0.259191512712639
uncorrected p-value: 0.23056663914326
GO ID	term	observed gene count	expected gene count	uncorrected p-value
GO:0008033	tRNA processing	1	0.239254	0.214879
Cluster 7: oogenesis
observed gene count: 4
expected gene count: 2.91092006584964
uncorrected p-value: 0.332260634922295
GO ID	term	observed gene count	expected gene count	uncorrected p-value
GO:0048477	oogenesis	3	2.07353	0.343544
GO:0032504	multicellular organism reproduction	1	0.797512	0.554468
Cluster 8: cell redox homeostasis
observed gene count: 1
expected gene count: 0.777574538137918
uncorrected p-value: 0.545338096974644
GO ID	term	observed gene count	expected gene count	uncorrected p-value
GO:0045454	cell redox homeostasis	1	0.737699	0.526518
Cluster 9: protein localization
observed gene count: 3
expected gene count: 2.91092006584964
uncorrected p-value: 0.561487154676963
GO ID	term	observed gene count	expected gene count	uncorrected p-value
GO:0046907	intracellular transport	2	0.199378	0.0159677
GO:0006886	intracellular protein transport	2	1.23614	0.351689
GO:0008104	protein localization	1	0.578196	0.443203
Cluster 10: protein targeting to mitochondrion
observed gene count: 1
expected gene count: 1.17633071154198
uncorrected p-value: 0.69718365721253
GO ID	term	observed gene count	expected gene count	uncorrected p-value
GO:0006626	protein targeting to mitochondrion	1	0.418694	0.345385

## Sheet: WEE_50-210-FEmbryo10-12h
sample name: WEE_50-210-FEmbryo10-12h
number of associated genes in the sample: 100
Cluster 1: RNA processing
observed gene count: 8
expected gene count: 2.92665081397476
uncorrected p-value: 0.00858549066344224
GO ID	term	observed gene count	expected gene count	uncorrected p-value
GO:0006396	RNA processing	2	0.256082	0.0261253
GO:0000398	nuclear mRNA splicing, via spliceosome	6	2.48765	0.0376338
GO:0006397	mRNA processing	1	0.256082	0.227995
Cluster 2: transcription, DNA-dependent
observed gene count: 4
expected gene count: 1.11578562282788
uncorrected p-value: 0.0248297510968255
GO ID	term	observed gene count	expected gene count	uncorrected p-value
GO:0006366	transcription from RNA polymerase II promoter	4	0.640205	0.0035714
GO:0006351	transcription, DNA-dependent	1	0.530455	0.415358
Cluster 3: RNA processing
observed gene count: 2
expected gene count: 0.256081946222791
uncorrected p-value: 0.0261253264887538
GO ID	term	observed gene count	expected gene count	uncorrected p-value
GO:0006396	RNA processing	2	0.256082	0.0261253
Cluster 4: phagocytosis, engulfment
observed gene count: 7
expected gene count: 4.06072800438998
uncorrected p-value: 0.110801601263696
GO ID	term	observed gene count	expected gene count	uncorrected p-value
GO:0016192	vesicle-mediated transport	3	1.22554	0.123422
GO:0006911	phagocytosis, engulfment	4	2.28645	0.194816
Cluster 5: intracellular transport
observed gene count: 6
expected gene count: 5.85330162794952
uncorrected p-value: 0.535963404930927
GO ID	term	observed gene count	expected gene count	uncorrected p-value
GO:0006614	SRP-dependent cotranslational protein targeting to membrane	3	0.182916	0.0006492
GO:0006626	protein targeting to mitochondrion	2	0.384123	0.0555206
GO:0046907	intracellular transport	1	0.182916	0.168699
GO:0006886	intracellular protein transport	1	1.13408	0.683702
Cluster 6: spindle organization
observed gene count: 4
expected gene count: 4.44485092372416
uncorrected p-value: 0.656229950722489
GO ID	term	observed gene count	expected gene count	uncorrected p-value
GO:0007051	spindle organization	1	0.182916	0.168699
GO:0007017	microtubule-based process	1	0.493872	0.393254
GO:0007052	mitotic spindle organization	3	2.35961	0.421653
Cluster 7: regulation of transcription, DNA-dependent
observed gene count: 2
expected gene count: 3.6400219498811
uncorrected p-value: 0.885089598594174
GO ID	term	observed gene count	expected gene count	uncorrected p-value
GO:0006355	regulation of transcription, DNA-dependent	2	3.0364	0.813477
Cluster 8: proteolysis
observed gene count: 1
expected gene count: 2.87177611121273
uncorrected p-value: 0.94718307115988
GO ID	term	observed gene count	expected gene count	uncorrected p-value
GO:0006508	proteolysis	1	2.8169	0.944084

## Sheet: WEE_50-240-FEmbryo10-12h
sample name: WEE_50-240-FEmbryo10-12h
number of associated genes in the sample: 161
Cluster 1: spindle organization (translation)
observed gene count: 24
expected gene count: 7.30345710627401
uncorrected p-value: 1.80331553085198e-07
GO ID	term	observed gene count	expected gene count	uncorrected p-value
GO:0000022	mitotic spindle elongation	20	1.94366	9.35977e-16
GO:0007052	mitotic spindle organization	21	3.79898	9.30264e-11
GO:0007051	spindle organization	1	0.294494	0.258565
GO:0000226	microtubule cytoskeleton organization	1	0.588988	0.45058
GO:0007017	microtubule-based process	1	0.795134	0.554711
Cluster 2: rRNA processing
observed gene count: 7
expected gene count: 1.91421254801536
uncorrected p-value: 0.00279350393971725
GO ID	term	observed gene count	expected gene count	uncorrected p-value
GO:0042254	ribosome biogenesis	5	0.795134	0.000993611
GO:0008033	tRNA processing	1	0.353393	0.301673
GO:0006364	rRNA processing	1	0.765685	0.541133
Cluster 3: RNA splicing
observed gene count: 5
expected gene count: 1.06017925736236
uncorrected p-value: 0.00374822326319484
GO ID	term	observed gene count	expected gene count	uncorrected p-value
GO:0008380	RNA splicing	2	0.235595	0.0214758
GO:0006397	mRNA processing	2	0.412292	0.0622067
GO:0006396	RNA processing	1	0.412292	0.34229
Cluster 4: cell redox homeostasis
observed gene count: 5
expected gene count: 1.14852752880922
uncorrected p-value: 0.00533287749032631
GO ID	term	observed gene count	expected gene count	uncorrected p-value
GO:0045454	cell redox homeostasis	5	1.08963	0.00423266
Cluster 5: regulation of pole plasm oskar mRNA localization
observed gene count: 3
expected gene count: 0.530089628681178
uncorrected p-value: 0.014776512352528
GO ID	term	observed gene count	expected gene count	uncorrected p-value
GO:0007317	regulation of pole plasm oskar mRNA localization	3	0.441741	0.00878904
Cluster 6: phagocytosis, engulfment
observed gene count: 11
expected gene count: 6.53777208706786
uncorrected p-value: 0.0620191387718
GO ID	term	observed gene count	expected gene count	uncorrected p-value
GO:0006911	phagocytosis, engulfment	7	3.68118	0.074813
GO:0016192	vesicle-mediated transport	4	1.97311	0.13413
Cluster 7: protein transport
observed gene count: 12
expected gene count: 8.56978233034571
uncorrected p-value: 0.148262663600375
GO ID	term	observed gene count	expected gene count	uncorrected p-value
GO:0006616	SRP-dependent cotranslational protein targeting to membrane, translocation	3	0.147247	0.00024005
GO:0015031	protein transport	5	1.41357	0.0128346
GO:0006613	cotranslational protein targeting to membrane	1	0.0294494	0.0294494
GO:0006614	SRP-dependent cotranslational protein targeting to membrane	2	0.294494	0.033209
GO:0046907	intracellular transport	1	0.294494	0.258565
GO:0008104	protein localization	1	0.854033	0.580681
GO:0006886	intracellular protein transport	1	1.82586	0.844928
GO:0055085	transmembrane transport	1	3.82843	0.98042
Cluster 8: protein targeting to mitochondrion
observed gene count: 3
expected gene count: 1.70806658130602
uncorrected p-value: 0.243260162123895
GO ID	term	observed gene count	expected gene count	uncorrected p-value
GO:0006626	protein targeting to mitochondrion	3	0.618438	0.0225845
Cluster 9: oogenesis
observed gene count: 8
expected gene count: 6.62612035851472
uncorrected p-value: 0.343622893470388
GO ID	term	observed gene count	expected gene count	uncorrected p-value
GO:0045451	pole plasm oskar mRNA localization	4	0.559539	0.00198728
GO:0007315	pole plasm assembly	1	0.206146	0.188896
GO:0009952	anterior/posterior pattern formation	1	0.206146	0.188896
GO:0007309	oocyte axis specification	1	0.265045	0.236029
GO:0008298	intracellular mRNA localization	1	0.353393	0.301673
GO:0007350	blastoderm segmentation	1	0.382843	0.322284
GO:0007314	oocyte anterior/posterior axis specification	1	0.412292	0.34229
GO:0007281	germ cell development	1	0.412292	0.34229
GO:0048477	oogenesis	3	3.06274	0.596414
GO:0032504	multicellular organism reproduction	1	1.17798	0.698812
Cluster 10: transcription, DNA-dependent
observed gene count: 1
expected gene count: 0.854033290653009
uncorrected p-value: 0.580680671844435
GO ID	term	observed gene count	expected gene count	uncorrected p-value
GO:0006351	transcription, DNA-dependent	1	0.854033	0.580681
Cluster 11: proteolysis
observed gene count: 1
expected gene count: 4.6235595390525
uncorrected p-value: 0.991454248761783
GO ID	term	observed gene count	expected gene count	uncorrected p-value
GO:0006508	proteolysis	1	4.53521	0.990628

## Sheet: WEE_50-240-FL1
sample name: WEE_50-240-FL1
number of associated genes in the sample: 83
Cluster 1: mitotic spindle elongation (translation)
observed gene count: 13
expected gene count: 3.76513627217853
uncorrected p-value: 7.75677271177194e-05
GO ID	term	observed gene count	expected gene count	uncorrected p-value
GO:0000022	mitotic spindle elongation	13	1.00201	9.27016e-12
GO:0007052	mitotic spindle organization	12	1.95848	4.15749e-07
Cluster 2: tRNA processing
observed gene count: 2
expected gene count: 0.440278031827328
uncorrected p-value: 0.0710049319115515
GO ID	term	observed gene count	expected gene count	uncorrected p-value
GO:0009451	RNA modification	1	0.030364	0.0301362
GO:0008033	tRNA processing	1	0.182184	0.167871

[truncated: 36 more sheets: WEE_50-300-FEmbryo6-8h, WEE_50-330-FEmbryo6-8h, WEE_50-360-FEmbryo4-6h, WEE_50-390-FEmbryo6-8h, WEE_50-420-FEmbryo6-8h, WEE_50-450-FEmbryo12-14h, WEE_50-480-FEmbryo12-14h, WEE_50-480-FPrepupae+2d, WEE_50-510-FEmbryo12-14h, WEE_50-510-FPrepupae+2d, WEE_50-540-FEmbryo14-16h, WEE_50-540-FPrepupae+2d, WEE_50-570-FEmbryo12-14h, WEE_50-570-FPrepupae+2d, WEE_50-600-FEmbryo18-20h, WEE_50-600-FPrepupae+2d, WEE_50-630-FEmbryo18-20h, WEE_50-630-FPrepupae+2d, WEE_50-660-FEmbryo18-20h, WEE_50-660-FPrepupae+2d …]
