# Supplementary material for: Comparison of D. melanogaster and C. elegans developmental stages, tissues, and cells by modENCODE RNA-seq data
Source: HighWire-hosted journal article supplement (doi:10.1101/gr.170100.113), 2014-07-01
Supplement: Supplemental_Files.zip [file TableS7C Top GO clusters in selected stage pairs.xls]

## Sheet: fly genes
worm embryo 50-0 - fly embryo 0-2h	worm embryo 50-240 - fly embryo 10-12h (column 1 early pair)	worm embryo 50-240 - fly larva L1 (column 1 late pair)	worm embryo 50-690 - fly embryo 18-20h (column 2 early pair)	worm embryo 50-690 - fly prepupae 2d (column 2 late pair)	worm larvae L4 MALE - fly embryo 22-24h (column 3 early pair)	worm larvae L4 MALE - fly male+1d (column 3 late pair)	worm young adult - fly female 5d	worm DauerDAF2 - fly embryo 22-24h
DNA repair	translation	translation	ion transport	ion transport	cation transport	response to insecticide	DNA recombination	ion transport
proteolysis	rRNA processing	tRNA processing	exocytosis	synaptic transmission	phosphorylation	glycerol metabolic process	DNA repair	protein amino acid phosphorylation
DNA replication	RNA splicing		chitin metabolic process	regulation of RNA metabolic process		glycolysis	meiosis
mitosis	cell redox homeostasis		calcium ion transport	response to light stimulus		ion transport	ribonucleoprotein complex assembly
chromosome condensation	regulation of pole plasm oskar mRNA localization		locomotory behavior	phosphorylation		oxidative phosphorylation	phosphorylation
oogenesis	phagocytosis, engulfment		phagocytosis, engulfment	vesicle-mediated transport		response to heat	oogenesis
female meiosis	protein transport		protein amino acid phosphorylation			proteolysis	regulation of programmed cell death
G2/M transition of mitotic cell cycle	protein targeting to mitochondrion		regulation of transcription, DNA-dependent			protein transport	RNA interference
nuclear export	oogenesis		neuron projection morphogenesis				translation
cell cycle checkpoint	transcription, DNA-dependent
