# Supplementary material for: Comparison of D. melanogaster and C. elegans developmental stages, tissues, and cells by modENCODE RNA-seq data
Source: HighWire-hosted journal article supplement (doi:10.1101/gr.170100.113), 2014-07-01
Supplement: Updated_Supplemental_TableS2.xlsx [file Updated_Supplemental_TableS2.xlsx]

## Sheet: fly developmental stages
Species	Sample Name	SRA accesssion	Sample Description	Organ/Tissue	Age	Sex	Sample Type	Sequencing platform	Single- vs paired-end	Reads sequenced (M)	URL for mapped reads	URL for gene expression estimates (in FPKM units)
D. melanogaster	Embryo0-2h	SRS004668	Embyros, 0-2 hour after egg laying	Whole organism	Embryo	Mixed Male/Female	RNA-seq	Illumina	paired	101	The previous links to the modENCODE website are no longer valid. Please email Dr. Jingyi Jessica Li (jli@stat.ucla.edu) for data request.	D. melanogaster gene expression estimates in 30 fly developmental stages:
D. melanogaster	Embryo2-4h	SRS004669	Embyros, 2-4 hours after egg laying	Whole organism	Embryo	Mixed Male/Female	RNA-seq	Illumina	paired	80		http://www.stat.ucla.edu/~jingyi.li/data/fly-worm/dm_timecourse_FPKMs.txt.bz2
D. melanogaster	Embryo4-6h	SRS004670	Embyros, 4-6 hours after egg laying	Whole organism	Embryo	Mixed Male/Female	RNA-seq	Illumina	paired	193
D. melanogaster	Embryo6-8h	SRS004671	Embyros, 6-8 hours after egg laying	Whole organism	Embryo	Mixed Male/Female	RNA-seq	Illumina	paired	119
D. melanogaster	Embryo8-10h	SRS004672	Embyros, 8-10 hours after egg laying	Whole organism	Embryo	Mixed Male/Female	RNA-seq	Illumina	paired	108
D. melanogaster	Embryo10-12h	SRS004673	Embyros, 10-12 hours after egg laying	Whole organism	Embryo	Mixed Male/Female	RNA-seq	Illumina	paired	139
D. melanogaster	Embryo12-14h	SRS004674	Embyros, 12-14 hours after egg laying	Whole organism	Embryo	Mixed Male/Female	RNA-seq	Illumina	paired	180
D. melanogaster	Embryo14-16h	SRS004675	Embyros, 14-16 hours after egg laying	Whole organism	Embryo	Mixed Male/Female	RNA-seq	Illumina	paired	137
D. melanogaster	Embryo16-18h	SRS004676	Embyros, 16-18 hours after egg laying	Whole organism	Embryo	Mixed Male/Female	RNA-seq	Illumina	paired	117
D. melanogaster	Embryo18-20h	SRS004677	Embyros, 18-20 hours after egg laying	Whole organism	Embryo	Mixed Male/Female	RNA-seq	Illumina	paired	127
D. melanogaster	Embryo20-22h	SRS004678	Embyros, 20-22 hours after egg laying	Whole organism	Embryo	Mixed Male/Female	RNA-seq	Illumina	paired	74
D. melanogaster	Embryo22-24h	SRS004679	Embyros, 22-24 hours after egg laying	Whole organism	Embryo	Mixed Male/Female	RNA-seq	Illumina	paired	155
D. melanogaster	L1	SRS004680	L1 stage larvae	Whole organism	L1	Mixed Male/Female	RNA-seq	Illumina	paired	126
D. melanogaster	L2	SRS004681	L2 stage larvae	Whole organism	L2	Mixed Male/Female	RNA-seq	Illumina	paired	189
D. melanogaster	L3+12h	SRS004682	L3 stage larvae, 12 hr post-molt	Whole organism	L3	Mixed Male/Female	RNA-seq	Illumina	paired	73
D. melanogaster	L3PS1-2	SRS004686	L3 stage larvae, dark blue gut, puff stage 1-2	Whole organism	L4	Mixed Male/Female	RNA-seq	Illumina	paired	80
D. melanogaster	L3PS3-6	SRS004687	L3 stage larvae, light blue gut, puff stage 3-6	Whole organism	L5	Mixed Male/Female	RNA-seq	Illumina	paired	73
D. melanogaster	L3PS7-9	SRS004867	L3 stage larvae, clear gut puff stage 7-9	Whole organism	L6	Mixed Male/Female	RNA-seq	Illumina	paired	103
D. melanogaster	Prepupae	SRS004868	White prepupae	Whole organism	Pupa	Mixed Male/Female	RNA-seq	Illumina	paired	114
D. melanogaster	Prepupae+12h	SRS004701	Pupae, 12 hours after white prepupae	Whole organism	Pupa	Mixed Male/Female	RNA-seq	Illumina	paired	129
D. melanogaster	Prepupae+24h	SRS004702	Pupae, 24 hours after white prepupae	Whole organism	Pupa	Mixed Male/Female	RNA-seq	Illumina	paired	105
D. melanogaster	Prepupae+2d	SRS004869	Pupae, 2 days after white prepupae	Whole organism	Pupa	Mixed Male/Female	RNA-seq	Illumina	paired	117
D. melanogaster	Prepupae+3d	SRS004870	Pupae, 3 days after white prepupae	Whole organism	Pupa	Mixed Male/Female	RNA-seq	Illumina	paired	154
D. melanogaster	Prepupae+4d	SRS004703	Pupae, 4 days after white prepupae	Whole organism	Pupa	Mixed Male/Female	RNA-seq	Illumina	paired	106
D. melanogaster	Male+1d	SRS004695	Adult male, one day after eclosion	Whole organism	Adult	Male	RNA-seq	Illumina	paired	112
D. melanogaster	Male+5d	SRS004696	Adult male, 5 days after eclosion	Whole organism	Adult	Male	RNA-seq	Illumina	paired	123
D. melanogaster	Male+30d	SRS004697	Adult male, 30 days after eclosion	Whole organism	Adult	Male	RNA-seq	Illumina	paired	104
D. melanogaster	Female+1d	SRS004689	Adult female, one day after eclosion	Whole organism	Adult	Female	RNA-seq	Illumina	paired	122
D. melanogaster	Female+5d	SRS004693	Adult female, 5 days after eclosion	Whole organism	Adult	Female	RNA-seq	Illumina	paired	91
D. melanogaster	Female+30d	SRS004692	Adult female, 30 days after eclosion	Whole organism	Adult	Female	RNA-seq	Illumina	paired	90

## Sheet: fly tissues and cell lines
Species	Sample Name	SRA accesssion	Sample Description	Tissue/Cell Line	Organ/Tissue	Age	Sex	Sample Type	Sequencing platform	Single- vs paired-end	Reads sequenced (M)	URL for mapped reads	URL for gene expression estimates (in FPKM units)
D. melanogaster	CarcassL3	SRR100269, SRR070426	third instar larvae, wandering stage, carcass	tissue	Muscle	L3	Mixed Male/Female	RNA-seq	Illumina	paired	88	The previous links to the modENCODE website are no longer valid. Please email Dr. Jingyi Jessica Li (jli@stat.ucla.edu) for data request.	D. melanogaster gene expression estimates in 29 fly tissues and 19 fly cell lines:
D. melanogaster	CarcassMixedMaleFemale+1d	SRR070395, SRR070399	mixed males and females, eclosion + 1 day, carcass	tissue	Muscle	Adult	Mixed Male/Female	RNA-seq	Illumina	paired	115		http://www.stat.ucla.edu/~jingyi.li/data/fly-worm/dm_tissuecell_FPKMs.txt.bz2
D. melanogaster	CarcassMixedMaleFemale+4d	SRR070387, SRR070402	mixed males and females, eclosion + 4 days, carcass	tissue	Muscle	Adult	Mixed Male/Female	RNA-seq	Illumina	paired	92
D. melanogaster	CarcassMixedMaleFemale+20d	SRR070391, SRR070404	mixed males and females, eclosion + 20 days, carcass	tissue	Muscle	Adult	Mixed Male/Female	RNA-seq	Illumina	paired	64
D. melanogaster	FatL3	SRR070405, SRR070406	third instar larvae, wandering stage, fat body	tissue	Endocrine/Liver	L3	Mixed Male/Female	RNA-seq	Illumina	paired	61
D. melanogaster	FatPrepupae	SRR070411, SRR070428	white prepupae, fat body	tissue	Endocrine/Liver	L4/Pupa	Mixed Male/Female	RNA-seq	Illumina	paired	93
D. melanogaster	FatPrepupae+2d	SRR070429,SRR070413	pupae, white prepupae+2d, fat	tissue	Endocrine/Liver	L4/Pupa	Mixed Male/Female	RNA-seq	Illumina	paired	55
D. melanogaster	SalivaryGlandsL3	SRR070425, SRR070407	third instar larvae, wandering stage, salivary glands	tissue	Exocrine gland	L3	Mixed Male/Female	RNA-seq	Illumina	paired	83
D. melanogaster	SalivaryGlandsPrepupae	SRR070427, SRR100270	white prepupae, salivary glands	tissue	Exocrine gland	L4/Pupa	Mixed Male/Female	RNA-seq	Illumina	paired	94
D. melanogaster	DigestiveSystemL3	SRR100268, SRR070408	third instar larvae, wandering stage, digestive system	tissue	Gut	L3	Mixed Male/Female	RNA-seq	Illumina	paired	94
D. melanogaster	DigestiveSystemMixedMaleFemale+1d	SRR070394, SRR070398	mixed males and females, eclosion + 1 day, digestive system	tissue	Gut	Adult	Mixed Male/Female	RNA-seq	Illumina	paired	60
D. melanogaster	DigestiveSystemMixedMaleFemale+4d	SRR070401, SRR070386, SRR111878, SRR111879	mixed males and females, eclosion + 4 days, digestive system	tissue	Gut	Adult	Mixed Male/Female	RNA-seq	Illumina	paired	165
D. melanogaster	DigestiveSystemMixedMaleFemale+20d	SRR070403, SRR070390, SRR111883	mixed males and females, eclosion + 20 days, digestive system	tissue	Gut	Adult	Mixed Male/Female	RNA-seq	Illumina	paired	106
D. melanogaster	ImaginalDiscsL3	SRR070392, SRR111884, SRR350962, SRR070393, SRR111885, SRR350963	third instar larvae, wandering stage, imaginal discs	tissue	Epithelial	L3	Mixed Male/Female	RNA-seq	Illumina	paired	415
D. melanogaster	CNSL3	SRR070409, SRR070410	third instar larvae, CNS	tissue	Neural	L3	Mixed Male/Female	RNA-seq	Illumina	paired	62
D. melanogaster	CNSPrepupae+2d	SRR100271, SRR070412	pupae, white prepupae+2d, CNS	tissue	Neural	L4/Pupa	Mixed Male/Female	RNA-seq	Illumina	paired	104
D. melanogaster	HeadsVirginFemale+1d	SRR070436, SRR070437, SRR100281	virgin female, eclosion + 1 day, heads	tissue	Neural	Adult	Female	RNA-seq	Illumina	paired	278
D. melanogaster	HeadsVirginFemale+4d	SRR070430, SRR100278, SRR100282	virgin female, eclosion + 4 days, heads	tissue	Neural	Adult	Female	RNA-seq	Illumina	paired	253
D. melanogaster	HeadsVirginFemale+20d	SRR070388, SRR070419, SRR100275	virgin female, eclosion + 20 days, heads	tissue	Neural	Adult	Female	RNA-seq	Illumina	paired	114
D. melanogaster	HeadsMatedFemale+1d	SRR070434, SRR070435, SRR100279	mated female, eclosion + 1 day, heads	tissue	Neural	Adult	Female	RNA-seq	Illumina	paired	264
D. melanogaster	HeadsMatedFemale+4d	SRR070414, SRR070415	mated female, eclosion + 4 days, heads	tissue	Neural	Adult	Female	RNA-seq	Illumina	paired	138
D. melanogaster	HeadsMatedFemale+20d	SRR116383, SRR111882, SRR070420, SRR100274	mated female, eclosion + 20 days, heads	tissue	Neural	Adult	Female	RNA-seq	Illumina	paired	71
D. melanogaster	HeadsMatedMale+1d	SRR070432, SRR070433, SRR100280	mated male, eclosion + 1 day, heads	tissue	Neural	Adult	Male	RNA-seq	Illumina	paired	196
D. melanogaster	HeadsMatedMale+4d	SRR070416, SRR070400	mated male, eclosion + 4 days, heads	tissue	Neural	Adult	Male	RNA-seq	Illumina	paired	127
D. melanogaster	HeadsMatedMale+20d	SRR070421, SRR070424	mated male, eclosion + 20 days, heads	tissue	Neural	Adult	Male	RNA-seq	Illumina	paired	105
D. melanogaster	OvariesVirginFemale+4d	SRR070396, SRR070417	virgin female, eclosion + 4 days, ovaries	tissue	Gonad	Adult	Female	RNA-seq	Illumina	paired	115
D. melanogaster	OvariesMatedFemale+4d	SRR070431, SRR100277, SRR100283	mated female, eclosion + 4 days, ovaries	tissue	Gonad	Adult	Female	RNA-seq	Illumina	paired	273
D. melanogaster	TestesMatedMale+4d	SRR070422, SRR350960, SRR070423, SRR100276, SRR350961	mated male, eclosion + 4 days, testes	tissue	Gonad	Adult	Male	RNA-seq	Illumina	paired	473
D. melanogaster	AccessoryGlandsMatedMale+4d	SRR070397, SRR111880, SRR182357, SRR070418, SRR100272, SRR100273, SRR111881, SRR182358, SRR350959	mated male, eclosion + 4 days, accessory glands	tissue	Gonad	Adult	Male	RNA-seq	Illumina	paired	107
D. melanogaster	(Embryo) 1182-4H	SRR070272	cell line 1182-4H from embryos	cell line	N.D.	Embryo	N.D.	RNA-seq	Illumina	paired	50
D. melanogaster	(Embryo) GM2	SRR070278, SRR070265, SRR070263	cell line GM2 from embryos	cell line	N.D.	Embryo	N.D.	RNA-seq	Illumina	single/paired	65
D. melanogaster	(Embryo) Kc167	SRR070261, SRR070269, SRR111873, SRR070292	cell line Kc167 from embryos	cell line	N.D.	Embryo	Female	RNA-seq	Illumina	single/paired	56
D. melanogaster	(Embryo) S1	SRR070280, SRR070286, SRR111877	cell line S1 from embryos	cell line	N.D.	Embryo	N.D.	RNA-seq	Illumina	single/paired	48
D. melanogaster	(Embryo) S3	SRR070259, SRR111872, SRR189834, SRR189835	cell line S3 from embryos	cell line	N.D.	Embryo	N.D.	RNA-seq	Illumina	single/paired	132
D. melanogaster	(Embryo) Sg4	SRR070271	cell line Sg4 from embryos	cell line	N.D.	Embryo	N.D.	RNA-seq	Illumina	paired	44
D. melanogaster	(L3 prothoracic leg disc) CME_L1	SRR070282, SRR070288	cell line CME_L1 from L3 larva prothoracic leg discs	cell line	ventral prothoracic disc	L3	N.D.	RNA-seq	Illumina	single/paired	84
D. melanogaster	(L3 eye-antennal disc) ML-DmD11	SRR070284, SRR070290, SRR111874	cell line ML-DmD11 from L3 larva eye-antennal discs	cell line	eye-antennal disc	L3	N.D.	RNA-seq	Illumina	single/paired	43
D. melanogaster	(L3 wing disc) CME_W2	SRR070260, SRR070268, SRR111868	cell line CME_W2 from L3 larva wing discs	cell line	dorsal mesothoracic disc	L3	N.D.	RNA-seq	Illumina	single/paired	77
D. melanogaster	(L3 wing disc) ML-DmD8	SRR070277	cell line ML-DmD8 from L3 larva wing discs	cell line	dorsal mesothoracic disc	L3	N.D.	RNA-seq	Illumina	paired	37
D. melanogaster	(L3 wing disc) ML-DmD9	SRR070274	cell line ML-DmD9 from L3 larva wing discs	cell line	dorsal mesothoracic disc	L3	N.D.	RNA-seq	Illumina	paired	56
D. melanogaster	(L3 wing disc) ML-DmD16-c3	SRR070283, SRR070289	cell line ML-DmD16-c3 from L3 larva wing discs	cell line	dorsal mesothoracic disc	L3	N.D.	RNA-seq	Illumina	single/paired	56
D. melanogaster	(L3 wing disc) ML-DmD21	SRR070276	cell line ML-DmD21 from L3 larva wing discs	cell line	dorsal mesothoracic disc	L3	N.D.	RNA-seq	Illumina	paired	55
D. melanogaster	(L3 wing disc) ML-DmD32	SRR070281, SRR070287, SRR111875	cell line ML-DmD32 from L3 larva wing discs	cell line	dorsal mesothoracic disc	L3	N.D.	RNA-seq	Illumina	single/paired	38
D. melanogaster	(L3 haltere disc) ML-DmD17-c3	SRR070285, SRR070291	cell line ML-DmD17-c3 from L3 larva haltere discs	cell line	dorsal metathoracic disc	L3	N.D.	RNA-seq	Illumina	single/paired	87
D. melanogaster	(L3 mixed imaginal discs) ML-DmD4-c1	SRR070273, SRR111876	cell line ML-DmD4-c1 from L3 larva mixed imaginal discs	cell line	imaginal disc	L3	N.D.	RNA-seq	Illumina	paired	116
D. melanogaster	(L3 CNS) ML-DmBG1-c1	SRR070275	cell line ML-DmBG1-c1 from L3 larva CNS	cell line	central nervous system	L3	N.D.	RNA-seq	Illumina	paired	36
D. melanogaster	(L3 CNS) ML-DmBG2-c2	SRR070262, SRR070270, SRR111870	cell line ML-DmBG2-c2 from L3 larva CNS	cell line	central nervous system	L3	N.D.	RNA-seq	Illumina	single/paired	35
D. melanogaster	(Tumorous blood cells) MBN2	SRR070258, SRR111869, SRR189833	cell line MBN2 from tumorous blood cells	cell line	larval circulatory system - tumorous blood cell	L3	N.D.	RNA-seq	Illumina	single/paired	75

## Sheet: worm developmental stages
Species	Sample Name	Annotated Name	SRA accesssion	Sample Description	Organ/Tissue	Age	Sex	Sample Type	Sequencing platform	Single- vs paired-end	Reads sequenced (M)	URL for mapped reads	URL for gene expression estimates (in FPKM units)
C. elegans	EE_50-0	embryo 0 mins	SRS258165	N2 embryonic time point data, polyA+ RNAseq - make eggs, hatch in absence of food to L1 arrest, add food, wait 50 hours, harvest eggs, incubate 0 minutes	Whole organism	Embryo	hermaphrodite	RNA-seq	Illumina	paired	34	The previous links to the modENCODE website are no longer valid. Please email Dr. Jingyi Jessica Li (jli@stat.ucla.edu) for data request.	C. elegans gene expression estimates in 35 worm developmental stages:
C. elegans	EE_50-30	embryo 30 mins	SRS258085	N2 embryonic time point data, polyA+ RNAseq - make eggs, hatch in absence of food to L1 arrest, add food, wait 50 hours, harvest eggs, incubate 30 minutes	Whole organism	Embryo	hermaphrodite	RNA-seq	Illumina	paired	21		http://www.stat.ucla.edu/~jingyi.li/data/fly-worm/ce_timecourse_FPKMs.txt.bz2
C. elegans	EE_50-60	embryo 60 mins	SRS242229	N2 embryonic time point data, polyA+ RNAseq - make eggs, hatch in absence of food to L1 arrest, add food, wait 50 hours, harvest eggs, incubate 60 minutes	Whole organism	Embryo	hermaphrodite	RNA-seq	Illumina	paired	19
C. elegans	EE_50-90	embryo 90 mins	SRS258166	N2 embryonic time point data, polyA+ RNAseq - make eggs, hatch in absence of food to L1 arrest, add food, wait 50 hours, harvest eggs, incubate 90 minutes	Whole organism	Embryo	hermaphrodite	RNA-seq	Illumina	paired	44
C. elegans	EE_50-120	embryo 120 mins	SRS242382	N2 embryonic time point data, polyA+ RNAseq - make eggs, hatch in absence of food to L1 arrest, add food, wait 50 hours, harvest eggs, incubate 120 minutes	Whole organism	Embryo	hermaphrodite	RNA-seq	Illumina	paired	28
C. elegans	EE_50-150	embryo 150 mins	SRS266274	N2 embryonic time point data, polyA+ RNAseq - make eggs, hatch in absence of food to L1 arrest, add food, wait 50 hours, harvest eggs, incubate 150 minutes	Whole organism	Embryo	hermaphrodite	RNA-seq	Illumina	paired	24
C. elegans	EE_50-180	embryo 180 mins	SRS266269	N2 embryonic time point data, polyA+ RNAseq - make eggs, hatch in absence of food to L1 arrest, add food, wait 50 hours, harvest eggs, incubate 180 minutes	Whole organism	Embryo	hermaphrodite	RNA-seq	Illumina	paired	44
C. elegans	EE_50-210	embryo 210 mins	SRS266275	N2 embryonic time point data, polyA+ RNAseq - make eggs, hatch in absence of food to L1 arrest, add food, wait 50 hours, harvest eggs, incubate 210 minutes	Whole organism	Embryo	hermaphrodite	RNA-seq	Illumina	paired	17
C. elegans	EE_50-240	embryo 240 mins	SRS266270	N2 embryonic time point data, polyA+ RNAseq - make eggs, hatch in absence of food to L1 arrest, add food, wait 50 hours, harvest eggs, incubate 240 minutes	Whole organism	Embryo	hermaphrodite	RNA-seq	Illumina	paired	17
C. elegans	EE_50-300	embryo 300 mins	SRS266880	N2 embryonic time point data, polyA+ RNAseq - make eggs, hatch in absence of food to L1 arrest, add food, wait 50 hours, harvest eggs, incubate 300 minutes	Whole organism	Embryo	hermaphrodite	RNA-seq	Illumina	paired	22
C. elegans	EE_50-330	embryo 330 mins	SRS266265	N2 embryonic time point data, polyA+ RNAseq - make eggs, hatch in absence of food to L1 arrest, add food, wait 50 hours, harvest eggs, incubate 330 minutes	Whole organism	Embryo	hermaphrodite	RNA-seq	Illumina	paired	20
C. elegans	EE_50-360	embryo 360 mins	SRS266266	N2 embryonic time point data, polyA+ RNAseq - make eggs, hatch in absence of food to L1 arrest, add food, wait 50 hours, harvest eggs, incubate 360 minutes	Whole organism	Embryo	hermaphrodite	RNA-seq	Illumina	paired	19
C. elegans	EE_50-390	embryo 390 mins	SRS266267	N2 embryonic time point data, polyA+ RNAseq - make eggs, hatch in absence of food to L1 arrest, add food, wait 50 hours, harvest eggs, incubate 390 minutes	Whole organism	Embryo	hermaphrodite	RNA-seq	Illumina	paired	19
C. elegans	EE_50-420	embryo 420 mins	SRS266268	N2 embryonic time point data, polyA+ RNAseq - make eggs, hatch in absence of food to L1 arrest, add food, wait 50 hours, harvest eggs, incubate 420 minutes	Whole organism	Embryo	hermaphrodite	RNA-seq	Illumina	paired	21
C. elegans	EE_50-450	embryo 450 mins	SRS266277	N2 embryonic time point data, polyA+ RNAseq - make eggs, hatch in absence of food to L1 arrest, add food, wait 50 hours, harvest eggs, incubate 450 minutes	Whole organism	Embryo	hermaphrodite	RNA-seq	Illumina	paired	34
C. elegans	EE_50-480	embryo 480 mins	SRS266271	N2 embryonic time point data, polyA+ RNAseq - make eggs, hatch in absence of food to L1 arrest, add food, wait 50 hours, harvest eggs, incubate 480 minutes	Whole organism	Embryo	hermaphrodite	RNA-seq	Illumina	paired	32
C. elegans	EE_50-510	embryo 510 mins	SRS266278	N2 embryonic time point data, polyA+ RNAseq - make eggs, hatch in absence of food to L1 arrest, add food, wait 50 hours, harvest eggs, incubate 510 minutes	Whole organism	Embryo	hermaphrodite	RNA-seq	Illumina	paired	29
C. elegans	EE_50-540	embryo 540 mins	SRS266272	N2 embryonic time point data, polyA+ RNAseq - make eggs, hatch in absence of food to L1 arrest, add food, wait 50 hours, harvest eggs, incubate 540 minutes	Whole organism	Embryo	hermaphrodite	RNA-seq	Illumina	paired	33
C. elegans	EE_50-570	embryo 570 mins	SRS266261	N2 embryonic time point data, polyA+ RNAseq - make eggs, hatch in absence of food to L1 arrest, add food, wait 50 hours, harvest eggs, incubate 570 minutes	Whole organism	Embryo	hermaphrodite	RNA-seq	Illumina	paired	30
C. elegans	EE_50-600	embryo 600 mins	SRS266262	N2 embryonic time point data, polyA+ RNAseq - make eggs, hatch in absence of food to L1 arrest, add food, wait 50 hours, harvest eggs, incubate 600 minutes	Whole organism	Embryo	hermaphrodite	RNA-seq	Illumina	paired	27
C. elegans	EE_50-630	embryo 630 mins	SRS266263	N2 embryonic time point data, polyA+ RNAseq - make eggs, hatch in absence of food to L1 arrest, add food, wait 50 hours, harvest eggs, incubate 630 minutes	Whole organism	Embryo	hermaphrodite	RNA-seq	Illumina	paired	31
C. elegans	EE_50-660	embryo 660 mins	SRS266264	N2 embryonic time point data, polyA+ RNAseq - make eggs, hatch in absence of food to L1 arrest, add food, wait 50 hours, harvest eggs, incubate 660 minutes	Whole organism	Embryo	hermaphrodite	RNA-seq	Illumina	paired	28
C. elegans	EE_50-690	embryo 690 mins	SRS266273	N2 embryonic time point data, polyA+ RNAseq - make eggs, hatch in absence of food to L1 arrest, add food, wait 50 hours, harvest eggs, incubate 690 minutes	Whole organism	Embryo	hermaphrodite	RNA-seq	Illumina	paired	22
C. elegans	EE_50-720	embryo 720 mins	SRS266279	N2 embryonic time point data, polyA+ RNAseq - make eggs, hatch in absence of food to L1 arrest, add food, wait 50 hours, harvest eggs, incubate 720 minutes	Whole organism	Embryo	hermaphrodite	RNA-seq	Illumina	paired	27
C. elegans	L1	larva L1	SRS003005,SRS151153	combined set containing N2 L1 larva polyA+ biological replicates	Whole organism	L1	hermaphrodite	RNA-seq	Illumina	single/paired	152
C. elegans	LIN35	larva L1 lin35	SRS002999	lin-35(n745) mid-L1 larva polyA+	Whole organism	L1	hermaphrodite	RNA-seq	Illumina	single	29
C. elegans	L2	larva L2	SRS001788,SRS174229	combined set containing N2 L2 larva polyA+ biological replicates	Whole organism	L2	hermaphrodite	RNA-seq	Illumina	single	44
C. elegans	L3	larva L3	SRS001790,SRS150938	combined set containing N2 L3 larva polyA+ biological replicates	Whole organism	L3	hermaphrodite	RNA-seq	Illumina	single	76
C. elegans	L4	larva L4	SRS001791,SRS004864	combined set containing N2 L4 larva polyA+ replicates	Whole organism	L4	hermaphrodite	RNA-seq	Illumina	single	40
C. elegans	L4MALE	larva L4 male	SRS003000,SRS174140	combined set containing N2 L4 larva males polyA+ biological replicates	Whole organism	L4	hermaphrodite	RNA-seq	Illumina	single	61
C. elegans	YA	young adult	SRS001789,SRS178501	combined set containing N2 young adult (pre-gravid) polyA+ biological replicates	Whole organism	Young adult	hermaphrodite	RNA-seq	Illumina	single	43
C. elegans	AdultSPE9	adult spe9	SRS004857	Adult spe-9 polyA+	Whole organism	Adult	hermaphrodite	RNA-seq	Illumina	single	65
C. elegans	DauerEntryDAF2	DauerEntryDAF2	SRS004860,SRS269109,SRS174141,SRS269110	combined set containing dauer entry daf-2(e1370) polyA+ biological replicates	Whole organism	Dauer entry	hermaphrodite	RNA-seq	Illumina	single/paired	105
C. elegans	DauerDAF2	DauerDAF2	SRS004859,SRS269390,SRS269389,SRS269391	combined set containing dauer daf-2(el370) polyA+ biological replicates	Whole organism	Dauer	hermaphrodite	RNA-seq	Illumina	single/paired	158
C. elegans	DauerExitDAF2	DauerExitDAF2	SRS004861,SRS151144,SRS269108,SRS269111	combined set containing dauer exit daf-2(e1370) polyA+ biological replicates	Whole organism	Dauer exit	hermaphrodite	RNA-seq	Illumina	single/paired	67

## Sheet: worm tissues and cells
Species	Sample Name	Annotated Name	SRA accesssion	Sample Description	Tissue or Cells	Organ/Tissue	Age	Sex	Sample Type	Sequencing platform	Single- vs paired-end	Reads sequenced (M)	URL for mapped reads	URL for gene expression estimates (in FPKM units)
C. elegans	DSN-Negative-Positive	4 cell stage embryo tissue DSN	SRS242383,SRS242384	N2 hand-picked 4 cell embryos DSN-Negative and DSN-Positive, total RNA	tissue	4 cell stage	EE	hermaphrodite	RNA-seq	Illumina	single	12	https://aspera.gs.washington.edu/aspera/user/modENCODE/C_elegans/20120601FreezeAlignments	C. elegans gene expression estimates in 4 worm tissues and 14 worm dissected cells:
C. elegans	N2_4cell_EE_RZ-56	4 cell stage embryo tissue RZ-56	SRS311761	N2 hand-picked 4 cell embryos, ribo-zero treated total RNA library	tissue	4 cell stage	EE	hermaphrodite	RNA-seq	Illumina	paired	15	Please email LaDeana Hillier <lhillier@watson.wustl.edu> for data request	http://www.stat.ucla.edu/~jingyi.li/data/fly-worm/ce_tissuecell_FPKMs.txt.bz2
C. elegans	PharyngealMuscle	PharyngealMuscle tissue	SRS242498	N2 pharyngeal muscle. Pharyngeal muscle, late embryo, total RNA	tissue	pharyngeal muscle	LE	hermaphrodite	RNA-seq	Illumina	paired	20
C. elegans	N2_Ad_gonad-1-RZLI	Adult gonad tissue RZLI	SRS344182	N2 adult gonad Ad_gonad-1 ribozero low input treated, total RNA, RNAseq random fragment library	tissue	gonad	Adult	hermaphrodite	RNA-seq	Illumina	single/paired	15
C. elegans	DMM239_Z1Z4_Em	Embryonic Z1/Z4 cells DMM239	SRS344160	DZ685 embryonic Z1/Z4 cells library FGSR239, total RNA, DSN treated, RNAseq random fragment library	cells	Z1/Z4 cells	Embryo	hermaphrodite	RNA-seq	Illumina	single/paired	11
C. elegans	DMM260_N2ref_EE	Early embryo cells DMM260	SRS344159	N2 early embryo reference cells library FGSR260, total RNA, DSN treated, RNAseq random fragment library	cells	Whole organism	EE	hermaphrodite	RNA-seq	Illumina	single/paired	10
C. elegans	DMM401_N2all_L1-DSN	All larval cells DMM401_L1-DSN	SRS311684	Illumina sequencing of C. elegans N2 larval L1 all cell library FGSR401 total RNA RNAseq random fragment library	cells	Whole organism	L1	hermaphrodite	RNA-seq	Illumina	paired	22
C. elegans	DMM401-N2all_L1-V	All larval cells DMM401_ L1-V	SRS311747	N2 larval L1 all cell library FGSR401, total RNA, RNAseq random fragment library	cells	Whole organism	L1	hermaphrodite	RNA-seq	Illumina	paired	209
C. elegans	DMM402_N2all_L1-DSN	All larval cells DMM402_L1-DSN	SRS311687	Illumina sequencing of C. elegans N2 larval L1 all cell library FGSR402 total RNA RNAseq random fragment library	cells	Whole organism	L1	hermaphrodite	RNA-seq	Illumina	paired	35
C. elegans	DMM402-N2all_L1-V	All larval cells DMM402_L1-V	SRS311750	N2 larval L1 all cell library FGSR402, total RNA, RNAseq random fragment library	cells	Whole organism	L1	hermaphrodite	RNA-seq	Illumina	paired	367
C. elegans	DMM383-all-nrn_L1-V	All neurons DMM383_L1	SRS311746	NW1229 larval L1 all neurons library FGSR383, total RNA, RNAseq random fragment library	cells	all neurons	L1	hermaphrodite	RNA-seq	Illumina	paired	90
C. elegans	DMM391-all-nrn_L1-V	All neurons DMM391_L1	SRS311749	NW1229 larval L1 all neurons library FGSR391, total RNA, RNAseq random fragment library	cells	all neurons	L1	hermaphrodite	RNA-seq	Illumina	paired	30
C. elegans	DMM386-NSML_NSMR-nrn_L1	NSML_NSMR neurons DMM386-L1	SRS308486	LX837 larval L1 NSML and NSMR neurons, total RNA, DSN treated	cells	NSML, NSMR neurons	L1	hermaphrodite	RNA-seq	Illumina	paired	9
C. elegans	DMM387-NSML_NSMR-nrn_L1-V	NSML_NSMR neurons DMM387-L1	SRS311748	LX837 larval L1 NSML and NSMR neurons library FGSR387, total RNA, RNAseq random fragment library	cells	NSML, NSMR neurons	L1	hermaphrodite	RNA-seq	Illumina	paired	14
C. elegans	DMM389_NSM_L1	NSM neurons DMM389_L1	SRS344181	LX837 larval L1 NSM neuron library FGSR389, total RNA, DSN treated, RNAseq random fragment library	cells	NSM neuron	L1	hermaphrodite	RNA-seq	Illumina	paired	15
C. elegans	DMM408_Amot_nrn_L2-DSN	Motor neurons DMM408_L2	SRS311688	Illumina sequencing of C. elegans larval L2 A motor neuron library FGSR408 DSN treated RNAseq random fragment library	cells	A motor neuron	L2	hermaphrodite	RNA-seq	Illumina	paired	14
C. elegans	DMM414_Amot_nrn_L2-DSN	Motor neurons DMM414_L2	SRS311689	Illumina sequencing of C. elegans larval L2 A motor neuron library FGSR414 DSN treated RNAseq random fragment library	cells	A motor neuron	L2	hermaphrodite	RNA-seq	Illumina	paired	14
C. elegans	DMM415_Amot_nrn_L2-DSN	Motor neuron DMM415_L2	SRS311690	Illumina sequencing of C. elegans larval L2 A motor neuron library FGSR415 DSN treated RNAseq random fragment library	cells	A motor neuron	L2	hermaphrodite	RNA-seq	Illumina	paired	16
