# Supplementary figures and images for: Comparison of D. melanogaster and C. elegans developmental stages, tissues, and cells by modENCODE RNA-seq data
Source: HighWire-hosted journal article supplement (doi:10.1101/gr.170100.113), 2014-07-01

**A**

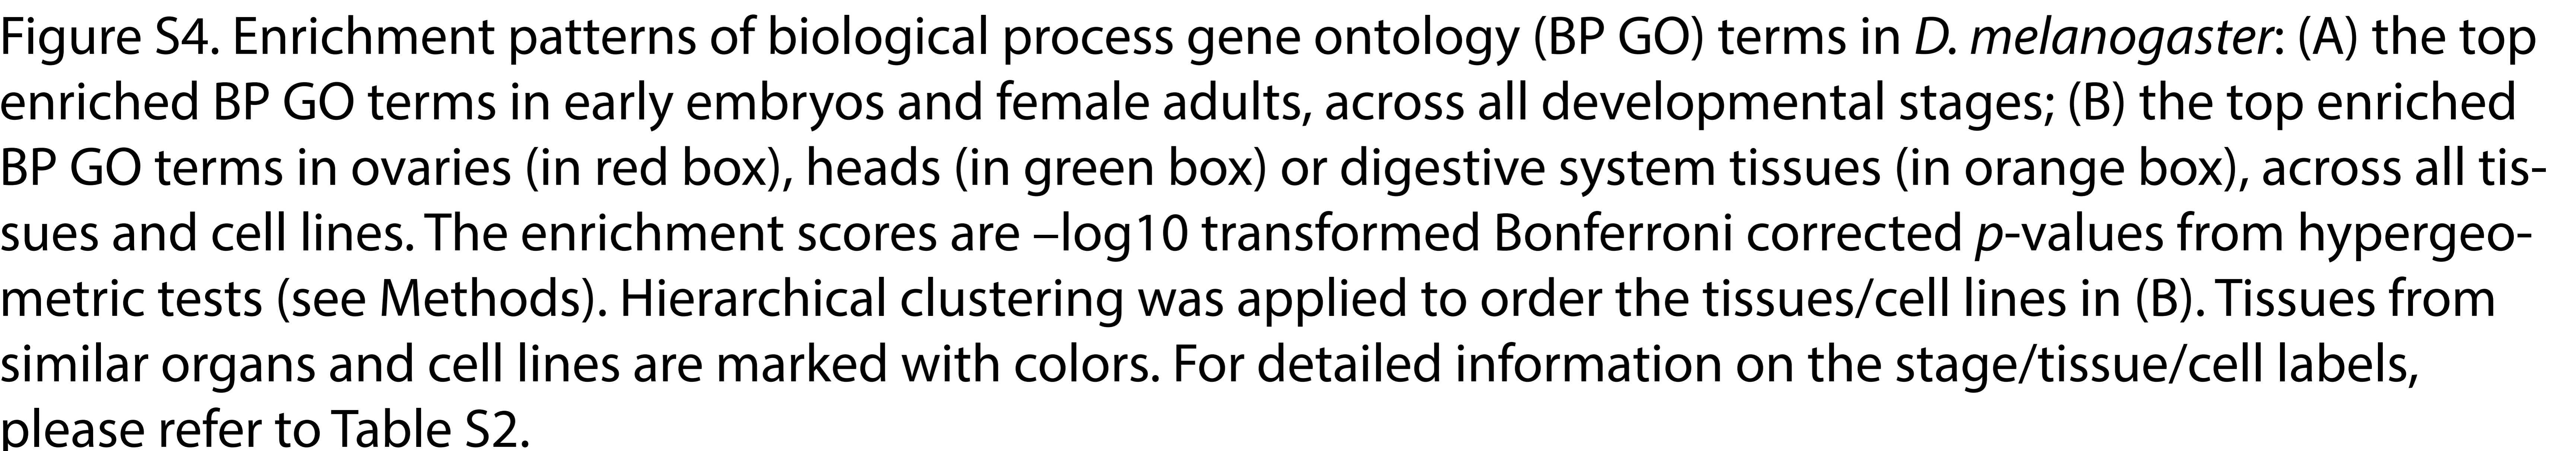

Supplement: Supplemental_Files.zip [file FigureS4 FlyStageAll (top 10 GOterms by p-values) (all).pdf › Supplementary files/FigureS4 FlyStageAll (top 10 GOterms by p-values) (all).pdf]
